# Supplementary material for: A Comparison of Sparse Partial Least Squares and Elastic Net in Wavelength Selection on NIR Spectroscopy Data
Source: Int J Anal Chem. 2019 Aug 1;2019:7314916. doi: 10.1155/2019/7314916 (PMC6699329; doi:10.1155/2019/7314916)
Supplement: Supplementary Materials — Three real data sets used in Section 4. All the data sets are saved as “.txt” format and can be used freely. [file 7314916.f1.zip]

Archive with 10 entries (9 files):
- 7314916.f1/
- 7314916.f1/bwX.txt
- 7314916.f1/bwy.txt
- 7314916.f1/gasolineX.txt
- 7314916.f1/gasoliney.txt
- 7314916.f1/m5spec.txt
- 7314916.f1/mp5spec.txt
- 7314916.f1/mp6spec.txt
- 7314916.f1/propvals.txt
- 7314916.f1/Readme.txt
