# Supplementary material for: A Comparison of Sparse Partial Least Squares and Elastic Net in Wavelength Selection on NIR Spectroscopy Data
Source: Int J Anal Chem. 2019 Aug 1;2019:7314916. doi: 10.1155/2019/7314916 (PMC6699329; doi:10.1155/2019/7314916)
Supplement: Supplementary Materials — Three real data sets used in Section 4. All the data sets are saved as “.txt” format and can be used freely. [file 7314916.f1.zip › 7314916.f1/bwX.txt]

"V1" "V2" "V3" "V4" "V5" "V6" "V7" "V8" "V9" "V10" "V11" "V12" "V13" "V14" "V15" "V16" "V17" "V18" "V19" "V20" "V21" "V22" "V23" "V24" "V25" "V26" "V27" "V28" "V29" "V30" "V31" "V32" "V33" "V34" "V35" "V36" "V37" "V38" "V39" "V40" "V41" "V42" "V43" "V44" "V45" "V46" "V47" "V48" "V49" "V50" "V51" "V52" "V53" "V54" "V55" "V56" "V57" "V58" "V59" "V60" "V61" "V62" "V63" "V64" "V65" "V66" "V67" "V68" "V69" "V70" "V71" "V72" "V73" "V74" "V75" "V76" "V77" "V78" "V79" "V80" "V81" "V82" "V83" "V84" "V85" "V86" "V87" "V88" "V89" "V90" "V91" "V92" "V93" "V94" "V95" "V96" "V97" "V98" "V99" "V100" "V101" "V102" "V103" "V104" "V105" "V106" "V107" "V108" "V109" "V110" "V111" "V112" "V113" "V114" "V115" "V116" "V117" "V118" "V119" "V120" "V121" "V122" "V123" "V124" "V125" "V126" "V127" "V128" "V129" "V130" "V131" "V132" "V133" "V134" "V135" "V136" "V137" "V138" "V139" "V140" "V141" "V142" "V143" "V144" "V145" "V146" "V147" "V148" "V149" "V150" "V151" "V152" "V153" "V154" "V155" "V156" "V157" "V158" "V159" "V160" "V161" "V162" "V163" "V164" "V165" "V166" "V167" "V168" "V169" "V170" "V171" "V172" "V173" "V174" "V175" "V176" "V177" "V178" "V179" "V180" "V181" "V182" "V183" "V184" "V185" "V186" "V187" "V188" "V189" "V190" "V191" "V192" "V193" "V194" "V195" "V196" "V197" "V198" "V199" "V200" "V201" "V202" "V203" "V204" "V205" "V206" "V207" "V208" "V209" "V210" "V211" "V212" "V213" "V214" "V215" "V216" "V217" "V218" "V219" "V220" "V221" "V222" "V223" "V224" "V225" "V226" "V227" "V228" "V229" "V230" "V231" "V232" "V233" "V234" "V235" "V236" "V237" "V238" "V239" "V240" "V241" "V242" "V243" "V244" "V245" "V246" "V247" "V248" "V249" "V250" "V251" "V252" "V253" "V254" "V255" "V256" "V257" "V258" "V259" "V260" "V261" "V262" "V263" "V264" "V265" "V266" "V267" "V268" "V269" "V270" "V271" "V272" "V273" "V274" "V275" "V276" "V277" "V278" "V279" "V280" "V281" "V282" "V283" "V284" "V285" "V286" "V287" "V288" "V289" "V290" "V291" "V292" "V293" "V294" "V295" "V296" "V297" "V298" "V299" "V300" "V301" "V302" "V303" "V304" "V305" "V306" "V307" "V308" "V309" "V310" "V311" "V312" "V313" "V314" "V315" "V316" "V317" "V318" "V319" "V320" "V321" "V322" "V323" "V324" "V325" "V326" "V327" "V328" "V329" "V330" "V331" "V332" "V333" "V334" "V335" "V336" "V337" "V338" "V339" "V340" "V341" "V342" "V343" "V344" "V345" "V346" "V347" "V348" "V349" "V350" "V351" "V352" "V353" "V354" "V355" "V356" "V357" "V358" "V359" "V360" "V361" "V362" "V363" "V364" "V365" "V366" "V367" "V368" "V369" "V370" "V371" "V372" "V373" "V374" "V375" "V376" "V377" "V378" "V379" "V380" "V381" "V382" "V383" "V384" "V385" "V386" "V387" "V388" "V389" "V390" "V391" "V392" "V393" "V394" "V395" "V396" "V397" "V398" "V399" "V400" "V401" "V402" "V403" "V404" "V405" "V406" "V407" "V408" "V409" "V410" "V411" "V412" "V413" "V414" "V415" "V416" "V417" "V418" "V419" "V420" "V421" "V422" "V423" "V424" "V425" "V426" "V427" "V428" "V429" "V430" "V431" "V432" "V433" "V434" "V435" "V436" "V437" "V438" "V439" "V440" "V441" "V442" "V443" "V444" "V445" "V446" "V447" "V448" "V449" "V450" "V451" "V452" "V453" "V454" "V455" "V456" "V457" "V458" "V459" "V460" "V461" "V462" "V463" "V464" "V465" "V466" "V467" "V468" "V469" "V470" "V471" "V472" "V473" "V474" "V475" "V476" "V477" "V478" "V479" "V480" "V481" "V482" "V483" "V484" "V485" "V486" "V487" "V488" "V489" "V490" "V491" "V492" "V493" "V494" "V495" "V496" "V497" "V498" "V499" "V500" "V501" "V502" "V503" "V504" "V505" "V506" "V507" "V508" "V509" "V510" "V511" "V512" "V513" "V514" "V515" "V516" "V517" "V518" "V519" "V520" "V521" "V522" "V523" "V524" "V525" "V526" "V527" "V528" "V529" "V530" "V531" "V532" "V533" "V534" "V535" "V536" "V537" "V538" "V539" "V540" "V541" "V542" "V543" "V544" "V545" "V546" "V547" "V548" "V549" "V550" "V551" "V552" "V553" "V554" "V555" "V556" "V557" "V558" "V559" "V560" "V561" "V562" "V563" "V564" "V565" "V566" "V567" "V568" "V569" "V570" "V571" "V572" "V573" "V574" "V575" "V576" "V577" "V578" "V579" "V580" "V581" "V582" "V583" "V584" "V585" "V586" "V587" "V588" "V589" "V590" "V591" "V592" "V593" "V594" "V595" "V596" "V597" "V598" "V599" "V600" "V601" "V602" "V603" "V604" "V605" "V606" "V607" "V608" "V609" "V610" "V611" "V612" "V613" "V614" "V615" "V616" "V617" "V618" "V619" "V620" "V621" "V622" "V623" "V624" "V625" "V626" "V627" "V628" "V629" "V630" "V631" "V632" "V633" "V634" "V635" "V636" "V637" "V638" "V639" "V640" "V641" "V642" "V643" "V644" "V645" "V646" "V647" "V648" "V649" "V650" "V651" "V652" "V653" "V654" "V655" "V656" "V657" "V658" "V659" "V660" "V661" "V662" "V663" "V664" "V665" "V666" "V667" "V668" "V669" "V670" "V671" "V672" "V673" "V674" "V675" "V676" "V677" "V678" "V679" "V680" "V681" "V682" "V683" "V684" "V685" "V686" "V687" "V688" "V689" "V690" "V691" "V692" "V693" "V694" "V695" "V696" "V697" "V698" "V699" "V700" "V701" "V702" "V703" "V704" "V705" "V706" "V707" "V708" "V709" "V710" "V711" "V712" "V713" "V714" "V715" "V716" "V717" "V718" "V719" "V720" "V721" "V722" "V723" "V724" "V725" "V726" "V727" "V728" "V729" "V730" "V731" "V732" "V733" "V734" "V735" "V736" "V737" "V738" "V739" "V740" "V741" "V742" "V743" "V744" "V745" "V746" "V747" "V748" "V749" "V750" "V751" "V752" "V753" "V754" "V755" "V756" "V757" "V758" "V759" "V760" "V761" "V762" "V763" "V764" "V765" "V766" "V767" "V768" "V769" "V770" "V771" "V772" "V773" "V774" "V775" "V776" "V777" "V778" "V779" "V780" "V781" "V782" "V783" "V784" "V785" "V786" "V787" "V788" "V789" "V790" "V791" "V792" "V793" "V794" "V795" "V796" "V797" "V798" "V799" "V800" "V801" "V802" "V803" "V804" "V805" "V806" "V807" "V808" "V809" "V810" "V811" "V812" "V813" "V814" "V815" "V816" "V817" "V818" "V819" "V820" "V821" "V822" "V823" "V824" "V825" "V826" "V827" "V828" "V829" "V830" "V831" "V832" "V833" "V834" "V835" "V836" "V837" "V838" "V839" "V840" "V841" "V842" "V843" "V844" "V845" "V846" "V847" "V848" "V849" "V850" "V851" "V852" "V853" "V854" "V855" "V856" "V857" "V858" "V859" "V860" "V861"
"1" 0.275421768 0.278220177 0.281030148 0.283797383 0.286610156 0.289438188 0.292259425 0.295030147 0.297907025 0.300784945 0.303622335 0.306409657 0.309263915 0.312115371 0.314997137 0.317825109 0.320614994 0.323429942 0.326241165 0.329062343 0.331960469 0.334740818 0.337564021 0.340362281 0.343212575 0.345954299 0.348663509 0.351442575 0.354182512 0.356885999 0.35957706 0.362270594 0.364948809 0.367567897 0.370203555 0.372795224 0.375298202 0.377873361 0.38035062 0.382803023 0.385217339 0.387627751 0.389888912 0.39221853 0.394455343 0.396688193 0.398798972 0.401039153 0.403078645 0.405172944 0.407094002 0.409060091 0.410917342 0.412760854 0.414529413 0.41623953 0.417823315 0.419376075 0.420910031 0.422365665 0.423800498 0.425276756 0.42663759 0.428035975 0.429367304 0.430689812 0.432036251 0.43342945 0.434734702 0.436210841 0.43754831 0.438955039 0.440446109 0.441778034 0.443183839 0.444371164 0.445757031 0.447100848 0.448383719 0.449608088 0.450799853 0.451870114 0.45293805 0.453855574 0.454671144 0.455353796 0.455826074 0.456194371 0.456326723 0.456426799 0.45642215 0.456341058 0.456234962 0.456070334 0.455896646 0.455683559 0.455593407 0.455432028 0.455211103 0.455156922 0.455166429 0.455301255 0.455513209 0.455905735 0.456435561 0.456960648 0.457682312 0.458346337 0.459015906 0.459860981 0.460624188 0.459360808 0.460304618 0.461229205 0.462169349 0.463090211 0.464024305 0.465030819 0.466113269 0.467054725 0.468087405 0.469110101 0.470172405 0.471217424 0.472213715 0.473231733 0.47428447 0.475309342 0.476317346 0.477288008 0.47832188 0.47933504 0.480325788 0.481277525 0.482317746 0.483313799 0.484250456 0.485207379 0.486172527 0.487148255 0.488079131 0.488990963 0.489887476 0.490725994 0.491591245 0.49246648 0.493378401 0.494197398 0.495000511 0.495756924 0.496460348 0.497130841 0.497796834 0.49846977 0.499008805 0.499486804 0.499981523 0.500430703 0.500825644 0.501186788 0.501491547 0.501737833 0.501918316 0.502037883 0.50209409 0.502060235 0.501915038 0.501664221 0.501324415 0.500828683 0.500182152 0.499325603 0.498277128 0.497014672 0.49548322 0.493775338 0.49184829 0.489612818 0.48718676 0.48457408 0.481785953 0.478840768 0.475703806 0.472444475 0.469201118 0.465889752 0.462584972 0.459414423 0.456398934 0.453575522 0.450898498 0.448426813 0.446191549 0.444195926 0.44237262 0.440646589 0.439022064 0.437454402 0.435969114 0.434454679 0.432920396 0.431459218 0.430063844 0.428752869 0.427509725 0.426422775 0.425486654 0.424697697 0.424058974 0.423613787 0.423322201 0.423145533 0.423129916 0.423266739 0.423571616 0.42403248 0.424653441 0.425462127 0.426512241 0.427725136 0.429042101 0.430442959 0.431903094 0.43338114 0.434835374 0.436265707 0.43764022 0.438986421 0.440288842 0.441513389 0.442674845 0.443764329 0.444763005 0.44567585 0.446512401 0.447265863 0.447965741 0.448618948 0.44918552 0.449694157 0.450167209 0.45058459 0.450966835 0.451315939 0.451664448 0.452053487 0.452474892 0.452925354 0.453386933 0.453928083 0.454503566 0.455095232 0.455697894 0.456276953 0.456796557 0.457234681 0.457600087 0.457885087 0.458054662 0.458086014 0.457991451 0.457750112 0.457377672 0.456873596 0.456219107 0.455428839 0.454449594 0.453288376 0.451982558 0.450508475 0.44886291 0.447041512 0.445061117 0.44291985 0.440585315 0.438107014 0.435527533 0.432828963 0.430011988 0.427093387 0.4241364 0.421104431 0.418056905 0.415043801 0.412079751 0.409176022 0.406344891 0.403564662 0.400846422 0.3981947 0.395631462 0.393169105 0.390803844 0.388564438 0.386466503 0.384442031 0.382425189 0.380364805 0.378196388 0.375779331 0.373004794 0.369882971 0.366382241 0.362420797 0.358006358 0.35321185 0.348064452 0.342519313 0.336661428 0.330535948 0.32420525 0.317717433 0.311111033 0.304520935 0.298046619 0.291737348 0.285665423 0.279919177 0.27458185 0.269676745 0.265156507 0.261057764 0.257425398 0.254240513 0.251424849 0.248987883 0.246939346 0.24524115 0.243828237 0.242672175 0.24174808 0.241025046 0.240455106 0.240014255 0.239677534 0.23941581 0.239182279 0.238975406 0.238812536 0.238676071 0.238552913 0.23847577 0.238455355 0.238497972 0.238627881 0.238862485 0.239183798 0.239602268 0.240113258 0.240694717 0.241344154 0.242041886 0.242778763 0.243556038 0.244368523 0.24520269 0.246065482 0.246955261 0.247861296 0.248774812 0.24969691 0.250642389 0.251617789 0.252585024 0.253528267 0.254478991 0.25544399 0.256389886 0.257299215 0.258169383 0.25899896 0.259771854 0.260489315 0.261158556 0.261783093 0.262369603 0.262923151 0.263465196 0.263979137 0.264479756 0.264954835 0.265420318 0.265891969 0.266348362 0.266803563 0.267284542 0.267773747 0.268250525 0.268704534 0.269144952 0.269579291 0.270029753 0.270470887 0.270885646 0.271307409 0.271721423 0.272135317 0.272553474 0.272981435 0.273420066 0.273894906 0.274410903 0.274972856 0.275610328 0.276319742 0.277096033 0.277963102 0.278898537 0.279899418 0.280950308 0.282030374 0.283144772 0.28425774 0.285375684 0.286509573 0.28764832 0.288763344 0.289856911 0.290902972 0.291913867 0.292902976 0.293826997 0.294715792 0.29555729 0.296322793 0.2970227 0.297669888 0.298242599 0.298742115 0.299157262 0.29947421 0.299687266 0.299773663 0.299750686 0.299596429 0.299322873 0.298933566 0.2984519 0.297872066 0.297213942 0.296545893 0.295888573 0.295263469 0.294704825 0.294254154 0.293878227 0.293559909 0.293301761 0.2930758 0.292835206 0.2925556 0.292222828 0.291812509 0.291326135 0.290738374 0.290074944 0.289370149 0.288616091 0.287860811 0.287109703 0.286352754 0.28562206 0.284893036 0.284163296 0.283444226 0.282655746 0.281798571 0.280887306 0.279957712 0.279080987 0.278283089 0.277637124 0.27713269 0.276778251 0.276613235 0.276568115 0.276600748 0.276700974 0.276800841 0.276837826 0.276784301 0.276642323 0.276440442 0.276189536 0.275867224 0.275524974 0.275173753 0.274763137 0.274332464 0.273903638 0.273494393 0.273121178 0.272807181 0.272572368 0.272369087 0.272204638 0.272073895 0.271953821 0.27185601 0.271803826 0.271778703 0.271760613 0.271789938 0.27183491 0.271947503 0.272124559 0.272308946 0.272538245 0.272794276 0.273114979 0.27344057 0.27373901 0.274059385 0.274351597 0.274626017 0.27489543 0.275123686 0.275359631 0.275609523 0.275872558 0.276188642 0.276489079 0.276832104 0.277247548 0.277684629 0.278142512 0.277456135 0.277926028 0.278432935 0.278909713 0.279368043 0.279777318 0.28011173 0.280337244 0.28044498 0.280399323 0.280189425 0.279829204 0.279272914 0.27848047 0.277454615 0.276179314 0.274653763 0.272788227 0.270549119 0.267908186 0.264858484 0.261306554 0.257231057 0.25264436 0.247517154 0.241782561 0.235395968 0.228419229 0.220984459 0.213103905 0.204868928 0.196475595 0.188115865 0.179986745 0.172106996 0.164754689 0.15809612 0.152187973 0.146996558 0.142548591 0.138856962 0.135835335 0.13344267 0.131588131 0.13021557 0.129309073 0.128835186 0.128694758 0.128845572 0.12927191 0.129935771 0.130842477 0.131914869 0.133108377 0.134453759 0.135971293 0.137564778 0.139194161 0.140858978 0.142589688 0.144319892 0.146029428 0.147761822 0.149509519 0.151255399 0.152999416 0.154710516 0.156417146 0.158149451 0.15989542 0.161650509 0.163401127 0.165167928 0.166931584 0.168671966 0.170376703 0.172042847 0.173710853 0.175356179 0.176948741 0.178457752 0.179914489 0.181288794 0.182598248 0.183820099 0.184967756 0.186000079 0.186889708 0.187631845 0.188260466 0.188783556 0.189146474 0.189336717 0.189368367 0.189252123 0.188987643 0.188578486 0.188052669 0.187422037 0.186620608 0.185693562 0.184715837 0.183662638 0.182536289 0.181342199 0.180106819 0.178857639 0.17760554 0.176302478 0.174971536 0.173712015 0.17248936 0.171309873 0.170113668 0.168969899 0.167900801 0.166870818 0.165847898 0.164865464 0.163969576 0.163102746 0.162281752 0.161528289 0.160863727 0.16025573 0.159694225 0.159184098 0.158724144 0.158308879 0.15793626 0.157568365 0.157229215 0.156940714 0.156669647 0.156435966 0.156259388 0.156158 0.156108722 0.156084225 0.156129211 0.156236053 0.156365067 0.156523794 0.156725615 0.156939656 0.15717265 0.157424971 0.157689244 0.157964021 0.158269286 0.158576548 0.158875361 0.1592215 0.159611046 0.160052538 0.160549894 0.161059961 0.161580622 0.162135795 0.162714615 0.163293242 0.163900688 0.164521009 0.165145785 0.165770367 0.166398466 0.167044848 0.167669982 0.168264732 0.168852642 0.169437557 0.17002663 0.170614779 0.171181664 0.171745211 0.172332853 0.172886476 0.173422202 0.173966974 0.174507722 0.175046474 0.175525501 0.175995827 0.176504299 0.176985145 0.177426487 0.177837893 0.178243712 0.178608179 0.178918242 0.179146677 0.179305092 0.179336712 0.179240003 0.179041088 0.178716436 0.178218529 0.177533939 0.176689878 0.175693572 0.174527422 0.173182458 0.171693414 0.170059681 0.168290734 0.166421592 0.164535016 0.16265218 0.160748675 0.158863932 0.157053083 0.155321464 0.153667986 0.152087539 0.15055877 0.149086863 0.147730872 0.146488324 0.145385593 0.144458026 0.143682778 0.143131554 0.142815292 0.14269495 0.142696351 0.142807156 0.142962277 0.143099099 0.143194377 0.143158019 0.142942086 0.142601237 0.142103419 0.141481325 0.14081268 0.140035003 0.139204174 0.138290361 0.137376815 0.136608288 0.135967359 0.135397419 0.134877786 0.134449005 0.134110346 0.133760348 0.133370489 0.132985219 0.132630542 0.132287413 0.131935775 0.131655648 0.131460503 0.131278142 0.131111249 0.130994618 0.130915076 0.130903512 0.130864635 0.130816415 0.130868986 0.130971685 0.131035417 0.131158039 0.131280318 0.131359965 0.131395087 0.131402209 0.131338164 0.13130933 0.131250769 0.131162688 0.13113147 0.131084561 0.131036595 0.130986288 0.130962387 0.130925193 0.130832627 0.130774379 0.130742893 0.130648434 0.130505651 0.130377129 0.130212098 0.130030081 0.129707679 0.12921913 0.128761739 0.128174782 0.127341032 0.126661748 0.126038864 0.125215128 0.124362126 0.123480767 0.122662984 0.121720672 0.120568149 0.119407564 0.118360326 0.117268145 0.115981072 0.114738435 0.1136747 0.112570636 0.111252978 0.10997691 0.108939849 0.107817158 0.106571451 0.105389267 0.104313135 0.103135183 0.10185422 0.100721925 0.099680685 0.098595865 0.097525805 0.09652704 0.095661357 0.094851501 0.094018519 0.093290217 0.09274473 0.092078589 0.091380365 0.090953894 0.090707727 0.090289988 0.089822203 0.089714155 0.08985474 0.08999864 0.089791387
"2" 0.2826702 0.285373151 0.288102537 0.290769577 0.293463856 0.296146065 0.29880175 0.301490128 0.304201394 0.306944937 0.309634864 0.312280893 0.3149499 0.317664772 0.320308715 0.322948784 0.325475395 0.327997118 0.330566168 0.333135366 0.335824996 0.338410854 0.341028482 0.343666166 0.346262217 0.348753065 0.351271838 0.35382244 0.356333435 0.358832836 0.361275792 0.363688141 0.366107643 0.368493259 0.37083149 0.37312758 0.375310361 0.377644062 0.379850656 0.382052302 0.384233475 0.386340886 0.388320386 0.390345246 0.392357886 0.394274861 0.396135122 0.398057193 0.399874151 0.401661813 0.403339356 0.40507257 0.406653732 0.40828684 0.409806132 0.4112342 0.412512004 0.413753122 0.414985716 0.416114599 0.417371213 0.418606371 0.419751674 0.42092371 0.422001481 0.423123688 0.424243897 0.42542094 0.426613331 0.427861035 0.429085106 0.430299938 0.431523412 0.432530284 0.43366316 0.434600562 0.435656965 0.436713755 0.437816024 0.438851297 0.439884156 0.440832943 0.44175154 0.442509502 0.443190634 0.443747401 0.444118977 0.444353968 0.444427252 0.444509804 0.444518358 0.444433719 0.444332123 0.444160908 0.443988115 0.443745017 0.443729132 0.443481266 0.443383187 0.44328323 0.443230838 0.443375409 0.443500698 0.443814814 0.44424513 0.444659591 0.445355028 0.445946395 0.446501613 0.447162241 0.447900176 0.446768224 0.447575927 0.448364347 0.449167699 0.449940711 0.450749129 0.451629758 0.452540904 0.453321666 0.454241306 0.455115676 0.456010431 0.456932127 0.457821429 0.458720118 0.459626228 0.46054709 0.461404026 0.462243676 0.463140577 0.464035332 0.464898944 0.465719253 0.466578364 0.467456847 0.468309969 0.469134927 0.469981909 0.470873028 0.471702248 0.472481132 0.473264754 0.474049985 0.474837631 0.475633889 0.47647199 0.477252632 0.477980107 0.478671074 0.479339153 0.479994655 0.480659515 0.481298774 0.481834382 0.482315123 0.482814759 0.483263105 0.483627528 0.483996183 0.484312177 0.484566331 0.484755397 0.484874904 0.484903693 0.484839618 0.484722823 0.484465271 0.484086663 0.483590454 0.482963681 0.482121676 0.481146365 0.479979753 0.478563607 0.476955473 0.475142479 0.473050058 0.470766455 0.46829915 0.465677589 0.462899745 0.459954619 0.456912994 0.453852624 0.450729996 0.447652459 0.444683701 0.441872478 0.439209193 0.43669641 0.434383303 0.432278693 0.430397362 0.428685814 0.42705369 0.425487101 0.423996866 0.422588795 0.421162844 0.419750482 0.41838789 0.417087317 0.415878356 0.414733827 0.413733155 0.412874877 0.412143677 0.411561698 0.411157548 0.410884649 0.410740077 0.4107503 0.410881162 0.411179304 0.411644638 0.412259102 0.413038611 0.414030463 0.415193588 0.416471988 0.417821974 0.41921398 0.420616359 0.422008276 0.423370451 0.424696326 0.425976038 0.427221119 0.428402454 0.429529399 0.430549949 0.431496829 0.432382345 0.433175653 0.433877945 0.434551537 0.435184717 0.435744613 0.436252385 0.436704874 0.437100232 0.437456489 0.437811375 0.438173562 0.438554496 0.438966721 0.439431816 0.439888269 0.440387428 0.440926731 0.441476762 0.442032993 0.442575693 0.443039477 0.443444729 0.443787962 0.444059551 0.444222599 0.444276363 0.444238901 0.444091022 0.443815649 0.443448424 0.442960203 0.442341 0.441537172 0.4405711 0.439494342 0.438237935 0.436782718 0.43513605 0.433332413 0.431363136 0.429189473 0.426878989 0.424460709 0.421931982 0.419272751 0.416503638 0.413685948 0.410779864 0.40785113 0.404959828 0.402100235 0.399301857 0.396579385 0.393923104 0.391317159 0.388765842 0.386306822 0.383935183 0.381661683 0.379509568 0.377482861 0.375518739 0.373571783 0.371601522 0.369515598 0.367192328 0.364538729 0.361545205 0.358183712 0.354393184 0.350176126 0.345580429 0.340644211 0.33533603 0.32972607 0.323863268 0.317815512 0.311624199 0.305312157 0.298999459 0.292812705 0.286786616 0.280981123 0.275489628 0.270373762 0.265658617 0.26130712 0.257361889 0.253861964 0.250783026 0.24806118 0.245692283 0.243679971 0.24200286 0.240590021 0.239418477 0.238492712 0.237758175 0.237157524 0.236684069 0.236307591 0.236008734 0.235749558 0.235516772 0.235316664 0.235130951 0.234950259 0.23479569 0.234712988 0.234708235 0.234780818 0.23494637 0.235204771 0.235554859 0.236002028 0.236525595 0.237116352 0.237752363 0.238441139 0.239175022 0.239936545 0.240718007 0.241536558 0.242381141 0.243239373 0.244107023 0.245004043 0.245924756 0.246857777 0.24779287 0.24872297 0.249657795 0.250599146 0.251526982 0.252424955 0.253281951 0.254105866 0.254877299 0.255587518 0.256263733 0.256904185 0.257496864 0.258049577 0.258591533 0.259115815 0.259637237 0.260125041 0.26060912 0.261111647 0.261597812 0.262079597 0.262567103 0.263048142 0.263544947 0.26403144 0.264490008 0.264938772 0.265387475 0.265822083 0.266240984 0.26666683 0.267087758 0.267497361 0.267906398 0.268314391 0.268743604 0.269211143 0.269728243 0.270287156 0.270904362 0.27159068 0.272352219 0.27319774 0.274095505 0.275073707 0.276110828 0.277184755 0.278297633 0.279406041 0.280506074 0.28162235 0.282731414 0.283836275 0.284919649 0.285950959 0.286941737 0.287921071 0.288853973 0.289733201 0.290562242 0.291333377 0.292052805 0.292719632 0.29331094 0.293826699 0.294258505 0.294594437 0.294836879 0.29496336 0.29498148 0.29486686 0.294633716 0.294294119 0.293851018 0.29332146 0.292723894 0.292100072 0.291474193 0.290877998 0.29035902 0.289923787 0.289537311 0.289203495 0.288935483 0.288689554 0.288420558 0.288127542 0.287785411 0.287374824 0.286884218 0.286321044 0.285677671 0.284997314 0.284278959 0.283536762 0.282799214 0.282075763 0.281372964 0.280655324 0.279927641 0.279198676 0.278411925 0.277565002 0.276679397 0.2757833 0.274937838 0.274164349 0.273530871 0.273059666 0.272742331 0.272590965 0.272557586 0.272623718 0.2727485 0.272855937 0.272887707 0.272829175 0.272709936 0.272531778 0.272279054 0.271962374 0.271631956 0.271282494 0.270862252 0.270429015 0.270023137 0.2696006 0.269215792 0.2689026 0.268645614 0.268439502 0.268263727 0.268115401 0.26798901 0.267890483 0.267815262 0.267775148 0.267771959 0.267777264 0.267821252 0.267944217 0.268100619 0.268293679 0.268527776 0.268781483 0.26910308 0.269416124 0.269715667 0.270001888 0.270246834 0.270500422 0.270752341 0.27098 0.271204352 0.271442831 0.271710753 0.272022098 0.272301644 0.272611707 0.273010284 0.273457408 0.273931235 0.273244292 0.273687303 0.274160743 0.274643451 0.275123149 0.27552554 0.275819808 0.276004553 0.276084423 0.276021391 0.275813192 0.275444806 0.274899006 0.27412343 0.273116857 0.271839082 0.270300955 0.268435776 0.26622799 0.263622761 0.26062873 0.257167786 0.253191501 0.248718202 0.243719265 0.238120437 0.231913358 0.225195557 0.218047023 0.210449368 0.202545315 0.194531158 0.186574638 0.178853542 0.171385869 0.164394885 0.158037335 0.152395636 0.147436127 0.143148363 0.139580548 0.136642277 0.134282619 0.132399499 0.130961999 0.129950836 0.129337162 0.12907356 0.129114211 0.129390538 0.129928872 0.130695075 0.131640941 0.132731244 0.133951977 0.135312811 0.136768371 0.138287112 0.139843449 0.141439825 0.143080547 0.144721508 0.146358967 0.148000553 0.149658725 0.151336759 0.152990237 0.154627264 0.156305507 0.157994047 0.15968594 0.161356539 0.163041085 0.164721042 0.166397661 0.168059438 0.1696987 0.171307921 0.172870755 0.174390078 0.175872505 0.177323788 0.178684443 0.179954588 0.181163609 0.18231827 0.183357552 0.184275463 0.185063303 0.185728624 0.186315253 0.186769918 0.187059417 0.187216282 0.187211409 0.187063336 0.186752677 0.186331347 0.185783148 0.185098991 0.18430306 0.183437765 0.182513595 0.181512743 0.180435017 0.179317743 0.178177267 0.177011371 0.175799817 0.174561709 0.173363134 0.172200382 0.171083301 0.169990778 0.168938443 0.167926967 0.166957483 0.166007966 0.165106654 0.164263263 0.163446561 0.162676826 0.161974832 0.161364272 0.160815597 0.160313368 0.159877375 0.159491286 0.159130454 0.15878877 0.158446491 0.158136785 0.157883048 0.157667682 0.157483667 0.157321855 0.157250583 0.157244176 0.157265738 0.157348678 0.15746136 0.157593831 0.157772824 0.157960579 0.158188313 0.15845558 0.158734262 0.159014717 0.159304634 0.159614056 0.159940124 0.160278216 0.160659283 0.161072835 0.161522135 0.161991 0.162491977 0.163044438 0.163605273 0.164141819 0.164673388 0.165239051 0.165825456 0.166400686 0.166985944 0.167578727 0.168193161 0.168787435 0.169327006 0.169869632 0.170416921 0.170982599 0.171539485 0.172070444 0.172578603 0.173121393 0.173655614 0.174173504 0.174700662 0.175196245 0.17566444 0.176126748 0.176603124 0.177091792 0.177531675 0.177972138 0.178417504 0.178809866 0.179147065 0.179425716 0.17963928 0.179790825 0.179828048 0.179749012 0.179556265 0.179233745 0.178764418 0.178093985 0.177249789 0.176237002 0.175068691 0.173708007 0.172202423 0.170572072 0.168855801 0.16704303 0.165177763 0.163303554 0.161411002 0.159509808 0.15768078 0.155942783 0.154278502 0.152696431 0.151149228 0.149704739 0.148362249 0.147121608 0.146025524 0.145091951 0.144329488 0.143779367 0.143449813 0.14331077 0.143341064 0.143468603 0.1436093 0.143738374 0.143837705 0.143778473 0.143574849 0.143291205 0.142852589 0.142208353 0.141493678 0.140752777 0.139938295 0.139037281 0.138195336 0.137452871 0.136761978 0.136152998 0.135645106 0.135252148 0.134927601 0.134583175 0.134227186 0.133831352 0.13345553 0.133120492 0.132779062 0.132523894 0.132345945 0.132147655 0.131923333 0.131765321 0.131692693 0.13169004 0.131697014 0.131645098 0.131652176 0.131725863 0.131857619 0.132018343 0.13211222 0.132105649 0.132089302 0.13208954 0.132056043 0.132053718 0.13197498 0.131825686 0.131753385 0.131717592 0.131676584 0.131625339 0.131561607 0.131514072 0.131439984 0.131353244 0.131334141 0.131324321 0.131215215 0.131077752 0.13089408 0.130643591 0.130271107 0.129814729 0.129336536 0.128793806 0.128040373 0.127335161 0.126736447 0.125973284 0.125169083 0.124318078 0.123366192 0.122329213 0.121260047 0.120296597 0.1192763 0.118125558 0.116950452 0.115808249 0.114789143 0.113672577 0.112416327 0.111237168 0.11014986 0.109077141 0.107999668 0.106811389 0.105558179 0.104507178 0.10334339 0.102289088 0.101296514 0.100116484 0.099091783 0.098250806 0.097435668 0.096587174 0.095685899 0.094997339 0.094509587 0.093955129 0.093230143 0.092700705 0.092634112 0.092416182 0.092004985 0.091816291 0.091945827 0.091929682 0.091675557
"3" 0.279045984 0.281796664 0.284566343 0.28728348 0.290037006 0.292792127 0.295530587 0.298260137 0.301054209 0.303864941 0.3066286 0.309345275 0.312106907 0.314890072 0.317652926 0.320386946 0.323045194 0.32571353 0.328403667 0.331098855 0.333892733 0.336575836 0.339296252 0.342014223 0.344737396 0.347353682 0.349967673 0.352632508 0.355257973 0.357859418 0.360426426 0.362979367 0.365528226 0.368030578 0.370517522 0.372961402 0.375304282 0.377758712 0.380100638 0.382427663 0.384725407 0.386984318 0.389104649 0.391281888 0.393406615 0.395481527 0.397467047 0.399548173 0.401476398 0.403417379 0.405216679 0.40706633 0.408785537 0.410523847 0.412167773 0.413736865 0.41516766 0.416564599 0.417947873 0.419240132 0.420585856 0.421941563 0.423194632 0.424479842 0.425684392 0.42690675 0.428140074 0.429425195 0.430674016 0.432035938 0.433316708 0.434627488 0.435984761 0.437154159 0.438423499 0.439485863 0.440706998 0.441907302 0.443099871 0.444229692 0.445342004 0.446351528 0.447344795 0.448182538 0.448930889 0.449550599 0.449972525 0.450274169 0.450376987 0.450468302 0.450470254 0.450387388 0.450283542 0.450115621 0.44994238 0.449714288 0.44966127 0.449456647 0.449297145 0.449220076 0.449198633 0.449338332 0.449506953 0.449860275 0.450340346 0.45081012 0.45151867 0.452146366 0.452758759 0.453511611 0.454262182 0.453064516 0.453940272 0.454796776 0.455668524 0.456515461 0.457386717 0.458330289 0.459327087 0.460188195 0.461164355 0.462112889 0.463091418 0.464074776 0.465017572 0.465975925 0.466955349 0.467928216 0.468860686 0.469765842 0.470731229 0.471685186 0.472612366 0.473498389 0.474448055 0.475385323 0.476280212 0.477171153 0.478077218 0.479010642 0.479890689 0.480736047 0.481576115 0.48238799 0.483214438 0.484050184 0.484925196 0.485725015 0.486490309 0.487213999 0.48789975 0.488562748 0.489228174 0.489884272 0.490421593 0.490900964 0.491398141 0.491846904 0.492226586 0.492591485 0.492901862 0.493152082 0.493336856 0.493456393 0.493498892 0.493449926 0.49331893 0.493064746 0.492705539 0.492209569 0.491572917 0.49072364 0.489711747 0.488497213 0.487023413 0.485365406 0.483495384 0.481331438 0.478976607 0.476436615 0.473731771 0.470870256 0.467829213 0.464678735 0.461526871 0.458309874 0.455118716 0.452049062 0.449135706 0.446392357 0.443797454 0.441405058 0.439235121 0.437296644 0.435529217 0.433850139 0.432254583 0.430725634 0.429278955 0.427808762 0.426335439 0.424923554 0.42357558 0.422315612 0.421121776 0.420077965 0.419180766 0.418420687 0.417810336 0.417385668 0.417103425 0.416942805 0.416940108 0.41707395 0.41737546 0.417838559 0.418456271 0.419250369 0.420271352 0.421459362 0.422757044 0.424132466 0.425558537 0.426998749 0.428421825 0.429818079 0.431168273 0.432481229 0.433754981 0.434957922 0.436102122 0.437157139 0.438129917 0.439029098 0.439844027 0.440571904 0.441258639 0.441901833 0.442465067 0.442973271 0.443436041 0.443842411 0.444211662 0.444563657 0.444919005 0.445303991 0.445720807 0.446178585 0.446637601 0.447157755 0.447715148 0.448285997 0.448865443 0.449426323 0.449918017 0.450339705 0.450694025 0.450972319 0.451138631 0.451181188 0.451115176 0.450920567 0.45059666 0.45016101 0.449589655 0.448884919 0.447993383 0.446929738 0.44573845 0.444373205 0.442822814 0.441088781 0.439196765 0.437141493 0.434887394 0.432493001 0.429994121 0.427380472 0.424642369 0.421798512 0.418911174 0.415942147 0.412954018 0.410001814 0.407089993 0.404238939 0.401462138 0.398743883 0.39608179 0.393480271 0.390969142 0.388552144 0.386232764 0.384037003 0.381974682 0.379980385 0.377998486 0.375983164 0.373855993 0.371485829 0.368771762 0.365714088 0.362282977 0.358406991 0.354091242 0.349396139 0.344354331 0.338927671 0.333193749 0.327199608 0.321010381 0.314670816 0.308211595 0.301760197 0.295429662 0.289261982 0.283323273 0.277704403 0.272477806 0.267667681 0.263231814 0.259209827 0.255643681 0.25251177 0.249743015 0.247340083 0.245309658 0.243622005 0.242209129 0.241045326 0.240120396 0.23939161 0.238806315 0.238349162 0.237992562 0.237712272 0.237465918 0.237246089 0.2370646 0.236903511 0.236751586 0.23663573 0.236584172 0.236603104 0.23670435 0.236904427 0.237194285 0.237578563 0.238057643 0.238610156 0.239230253 0.239897124 0.240609951 0.24136553 0.242152534 0.242960349 0.24380102 0.244668201 0.245550334 0.246440917 0.247350477 0.248283572 0.249237783 0.250188947 0.251125619 0.252068393 0.253021568 0.253958434 0.254862085 0.255725667 0.256552413 0.257324576 0.258038417 0.258711144 0.259343639 0.259933233 0.260486364 0.261028364 0.261547476 0.262058496 0.262539938 0.263014719 0.263501808 0.263973087 0.26444158 0.264925823 0.265410945 0.265897736 0.266367987 0.26681748 0.267259032 0.267708614 0.268146485 0.268563315 0.268987119 0.26940459 0.269816339 0.270229936 0.270647913 0.271081835 0.271553025 0.272069573 0.272630006 0.273257345 0.273955211 0.274724126 0.275580421 0.276497021 0.277486563 0.278530568 0.279607564 0.280721202 0.28183189 0.282940879 0.284065962 0.285189867 0.28629981 0.28738828 0.288426965 0.289427802 0.290412024 0.291340485 0.292224497 0.293059766 0.293828085 0.294537753 0.29519476 0.29577677 0.296284407 0.296707883 0.297034323 0.297262073 0.297368512 0.297366083 0.297231644 0.296978295 0.296613842 0.296151459 0.295596763 0.294968918 0.294322982 0.293681383 0.293070734 0.292531922 0.292088971 0.291707769 0.291381702 0.291118622 0.290882677 0.290627882 0.290341571 0.290004119 0.289593667 0.289105177 0.288529709 0.287876308 0.287183732 0.286447525 0.285698786 0.284954458 0.284214258 0.283497512 0.28277418 0.282045469 0.281321451 0.280533835 0.279681787 0.278783351 0.277870506 0.277009413 0.276223719 0.275583997 0.275096178 0.274760291 0.2746021 0.274562851 0.274612233 0.274724737 0.274828389 0.274862766 0.274806738 0.274676129 0.27448611 0.274234295 0.273914799 0.273578465 0.273228124 0.272812694 0.272380739 0.271963388 0.271547496 0.271168485 0.27085489 0.270608991 0.270404294 0.270234182 0.270094648 0.269971415 0.269873247 0.269809544 0.269776925 0.269766286 0.269783601 0.269828081 0.26994586 0.270112589 0.270301312 0.27053301 0.27078788 0.27110903 0.271428347 0.271727338 0.272030637 0.272299215 0.272563219 0.272823885 0.273051843 0.273281991 0.273526177 0.273791656 0.27410537 0.274395362 0.274721906 0.275128916 0.275571018 0.276036873 0.275350213 0.275806665 0.276296839 0.276776582 0.277245596 0.277651429 0.277965769 0.278170899 0.278264701 0.278210357 0.278001308 0.277637005 0.27708596 0.27630195 0.275285736 0.274009198 0.272477359 0.270612001 0.268388554 0.265765473 0.262743607 0.25923717 0.255211279 0.250681281 0.245618209 0.239951499 0.233654663 0.226807393 0.219515741 0.211776637 0.203707121 0.195503376 0.187345251 0.179420143 0.171746433 0.164574787 0.158066727 0.152291805 0.147216342 0.142848477 0.139218755 0.136238806 0.133862644 0.131993815 0.130588785 0.129629955 0.129086174 0.128884159 0.128979892 0.129331224 0.129932322 0.130768776 0.131777905 0.132919811 0.134202868 0.135642052 0.137166575 0.138740636 0.140351214 0.142014757 0.14370022 0.145375468 0.147060394 0.148755036 0.150457062 0.152168088 0.153850377 0.155522205 0.157227479 0.158944733 0.160668224 0.162378833 0.164104506 0.165826313 0.167534813 0.169218071 0.170870773 0.172509387 0.174113467 0.175669409 0.177165128 0.178619139 0.179986618 0.181276418 0.182491854 0.183643013 0.184678815 0.185582586 0.186347574 0.186994545 0.187549405 0.187958196 0.188198067 0.188292325 0.188231766 0.188025489 0.187665582 0.187192008 0.186602592 0.185859799 0.184998311 0.184076801 0.183088116 0.182024516 0.180888608 0.179712281 0.178517453 0.177308455 0.176051147 0.174766622 0.173537575 0.172344871 0.171196587 0.170052223 0.168954171 0.167913884 0.16691415 0.165927932 0.164986059 0.16411642 0.163274653 0.162479289 0.161751561 0.161114 0.160535663 0.160003796 0.159530737 0.159107715 0.158719666 0.158362515 0.158007428 0.157683 0.157411881 0.157168664 0.156959817 0.156790622 0.156704292 0.156676449 0.156674981 0.156738944 0.156848706 0.156979449 0.157148309 0.157343097 0.157563984 0.157814115 0.158079617 0.15835198 0.158634327 0.158941671 0.159258336 0.159576789 0.159940392 0.160341941 0.160787337 0.161270447 0.161775969 0.16231253 0.162870534 0.163428217 0.163983315 0.16456987 0.165173233 0.165773235 0.166378155 0.166988596 0.167619005 0.168228708 0.168795869 0.169361137 0.169927239 0.170504615 0.171077132 0.171626054 0.172161907 0.172727123 0.173271045 0.173797853 0.174333818 0.174851984 0.175355457 0.175826125 0.176299475 0.176798046 0.17725841 0.177699313 0.178127699 0.178526789 0.178877622 0.179171979 0.179392979 0.179547958 0.17958238 0.179494508 0.179298677 0.17897509 0.178491473 0.177813962 0.176969834 0.175965287 0.174798056 0.173445232 0.171947919 0.170315877 0.168573268 0.166732311 0.164856389 0.162977867 0.161079839 0.15918687 0.157366931 0.155632123 0.153973244 0.152391985 0.150853999 0.149395801 0.148046561 0.146804966 0.145705558 0.144774988 0.144006133 0.143455461 0.143132553 0.14300286 0.143018708 0.14313788 0.143285789 0.143418737 0.143516041 0.143468246 0.143258467 0.142946221 0.142478004 0.141844839 0.141153179 0.14039389 0.139571235 0.138663821 0.137786075 0.137030579 0.136364669 0.135775208 0.135261446 0.134850577 0.134518974 0.134171762 0.133798838 0.133408286 0.133043036 0.132703952 0.132357419 0.132089771 0.131903224 0.131712899 0.131517291 0.131379969 0.131303884 0.131296776 0.131280825 0.131230757 0.131260581 0.131348774 0.131446518 0.131588191 0.131696269 0.131732807 0.131742194 0.131745875 0.131697103 0.131681524 0.131612875 0.131494187 0.131442428 0.131401077 0.131356589 0.131305814 0.131261997 0.131219633 0.131136306 0.131063811 0.131038517 0.130986378 0.130860433 0.13072744 0.130553089 0.130336836 0.129989393 0.129516929 0.129049137 0.128484294 0.127690703 0.126998454 0.126387656 0.125594206 0.124765605 0.123899423 0.123014588 0.122024942 0.120914098 0.119852081 0.118818313 0.117696851 0.116465762 0.115273342 0.114231922 0.113121606 0.111834653 0.110607039 0.109544855 0.108447149 0.107285559 0.106100328 0.104935657 0.103821181 0.102598805 0.101505507 0.100488599 0.099356174 0.098308794 0.097388923 0.096548513 0.095719337 0.094852209 0.094143778 0.093627159 0.093016859 0.092305254 0.091827299 0.091670919 0.091353085 0.090913594 0.090765223 0.090900283 0.090964161 0.090733472
"4" 0.271954954 0.274624586 0.277341604 0.279975742 0.282638609 0.285291851 0.28795132 0.29062134 0.293297708 0.295983016 0.298636079 0.301275998 0.303889215 0.306537777 0.309196889 0.311769992 0.314285457 0.316750467 0.319249868 0.321775943 0.324458569 0.32697171 0.329516947 0.3320705 0.334624708 0.337016165 0.339452446 0.341952085 0.344408095 0.346805274 0.349183381 0.351531416 0.353885651 0.356165886 0.35842064 0.360635847 0.362739652 0.364960194 0.367076695 0.369160682 0.371252298 0.373286724 0.375143081 0.377073735 0.379038543 0.380891621 0.382692605 0.38451153 0.386250883 0.387937367 0.38953349 0.391153127 0.392654687 0.394150376 0.395611107 0.396973252 0.398197412 0.399359584 0.400505513 0.401567817 0.402688205 0.403872848 0.404987097 0.406033844 0.407069594 0.408124298 0.409150988 0.410247743 0.411347389 0.412549824 0.413657755 0.414780647 0.415917844 0.416938603 0.41801098 0.418848693 0.419862717 0.420882165 0.42193681 0.422849238 0.423815787 0.424720526 0.425529957 0.42632097 0.426882505 0.427432865 0.4277457 0.427970618 0.428002536 0.428051382 0.42806679 0.428002477 0.427797854 0.427564204 0.427375227 0.427152365 0.426996738 0.426764786 0.426591098 0.426431149 0.426267922 0.426444888 0.426462471 0.426750749 0.427059859 0.427406251 0.42807427 0.428466082 0.428989023 0.429641724 0.430313498 0.429294348 0.429944485 0.430617929 0.431293994 0.431991071 0.432671249 0.433424562 0.434251755 0.434960514 0.4357346 0.4365426 0.437349349 0.43813014 0.438943237 0.439712435 0.440503865 0.441327214 0.442115813 0.442820281 0.443600655 0.444416791 0.445196986 0.445942998 0.446761906 0.447531641 0.448245883 0.449006945 0.449772418 0.450544357 0.451295882 0.452011108 0.452717274 0.453382403 0.454069436 0.454744846 0.455440074 0.456098914 0.456711292 0.457292944 0.457863718 0.458377451 0.458874553 0.45938018 0.45978266 0.460118294 0.460472912 0.460788071 0.461049348 0.461289227 0.461486608 0.461619824 0.461704791 0.461717814 0.46167171 0.461564064 0.461352915 0.461022109 0.460601598 0.460077584 0.459448665 0.458644152 0.45772627 0.456621915 0.455265999 0.453739882 0.452050656 0.450102806 0.447973311 0.44569397 0.443231285 0.440625817 0.437886029 0.435050905 0.432198167 0.429298103 0.426425725 0.423660904 0.421054006 0.418566793 0.416183352 0.413992226 0.412007421 0.410211295 0.408560306 0.406982869 0.405479193 0.404052138 0.402693152 0.401320845 0.399959445 0.398657233 0.397413641 0.396268696 0.395192534 0.39425841 0.393455744 0.392767966 0.392220885 0.391851783 0.391601801 0.391468883 0.391471177 0.391599387 0.391878694 0.39230296 0.392847121 0.393560946 0.394455612 0.395504117 0.396665782 0.397886485 0.39912191 0.400360823 0.401603878 0.402800649 0.403962404 0.405086964 0.406174809 0.40719977 0.408159286 0.409051001 0.4098804 0.410628766 0.411305159 0.411892354 0.4124403 0.412952542 0.413383543 0.413783997 0.414161742 0.414488316 0.414748639 0.415003568 0.415296286 0.415609151 0.415965527 0.416347027 0.41672641 0.417160928 0.417613208 0.418076962 0.418557584 0.419018447 0.419416577 0.419757158 0.420031786 0.420230448 0.420314252 0.420299441 0.420183152 0.419969112 0.419648707 0.419206142 0.418669462 0.418040216 0.417217016 0.416236639 0.415149391 0.413905412 0.412508249 0.410974681 0.409299642 0.407466829 0.405463845 0.403350711 0.401144892 0.398851693 0.39646855 0.39399603 0.391487926 0.388887674 0.386270761 0.38367945 0.381127954 0.378622502 0.376173019 0.373772621 0.371438295 0.369172215 0.366986871 0.364893258 0.362891734 0.36099726 0.359226763 0.357512057 0.355789751 0.354025513 0.352175355 0.350114554 0.347752422 0.345084488 0.342107385 0.338747412 0.334996134 0.330920309 0.326540083 0.321823835 0.316821098 0.311579615 0.306157351 0.300583124 0.29490006 0.289204389 0.28359592 0.2781201 0.272821397 0.267798275 0.263106853 0.25877279 0.25476408 0.251118958 0.247870743 0.245004222 0.242454067 0.240227684 0.238336101 0.236750737 0.235416651 0.234306857 0.23340933 0.23268874 0.232105404 0.231645331 0.231275842 0.230975419 0.230714843 0.230478913 0.230281383 0.230104953 0.229935467 0.229795218 0.229713991 0.229695901 0.229750961 0.229901075 0.230134457 0.230457842 0.230866015 0.231329754 0.231856301 0.232429221 0.233036846 0.233683363 0.234353542 0.235057876 0.235796243 0.236550152 0.237317979 0.238102973 0.238901749 0.239726529 0.240573123 0.241414472 0.242237985 0.243071318 0.243897945 0.244708061 0.245498583 0.24626267 0.24700138 0.247686177 0.248319507 0.248923197 0.24949491 0.250025272 0.250523567 0.251013458 0.251499116 0.251974374 0.2524122 0.252844125 0.253292531 0.253727883 0.254157275 0.254593223 0.255026102 0.255476296 0.255907655 0.256305605 0.2566908 0.257087886 0.257472217 0.257834673 0.258200645 0.258558601 0.258910269 0.259279639 0.259661376 0.260053724 0.260468692 0.260928959 0.261429101 0.261982352 0.262597352 0.263273627 0.264029175 0.264832646 0.265707076 0.266622543 0.267562598 0.268543273 0.26952967 0.270507008 0.271485269 0.272466034 0.27343908 0.274399698 0.27532053 0.276197284 0.277061075 0.277892739 0.27868551 0.279428929 0.280113578 0.280742913 0.281322688 0.281845212 0.282309711 0.282694638 0.282985866 0.283200145 0.283308685 0.283312142 0.28319937 0.28299439 0.282701075 0.282313466 0.281848758 0.281333268 0.280795932 0.28025499 0.279755265 0.279298693 0.278913498 0.278574526 0.278257966 0.277985513 0.277743876 0.277476281 0.277178049 0.276832044 0.276411265 0.275922358 0.275377721 0.274774134 0.274119049 0.273454726 0.272774875 0.272088528 0.271418691 0.270732075 0.270057559 0.269390643 0.268724918 0.268023044 0.267243683 0.266415805 0.265591085 0.264824897 0.264118016 0.263528496 0.263083816 0.262782782 0.26263845 0.262588263 0.262615323 0.262701392 0.262778014 0.262798965 0.262739927 0.262606144 0.262426943 0.26217553 0.26187411 0.26158303 0.261281192 0.260930121 0.260557204 0.260209203 0.25985378 0.25953725 0.259275764 0.259050012 0.258866012 0.258725852 0.258625567 0.258524239 0.25843522 0.258374631 0.258350968 0.258350551 0.258357465 0.258400917 0.258515537 0.258664399 0.258827865 0.259017557 0.259230286 0.259493679 0.259765476 0.260028481 0.260276288 0.260509402 0.260748446 0.260978729 0.261181474 0.261375695 0.261607528 0.26187551 0.262146115 0.262408644 0.26271221 0.263053447 0.263448238 0.263892323 0.263269931 0.263657659 0.264071971 0.264496058 0.264911294 0.265267879 0.265557349 0.265740514 0.265840083 0.265804172 0.265639305 0.265359849 0.264913201 0.264249206 0.263380736 0.262310207 0.260996163 0.259402573 0.257517457 0.255295664 0.252735913 0.249779657 0.246376276 0.242551267 0.23825857 0.233401164 0.22797066 0.222031727 0.215676293 0.208899915 0.201785728 0.194493115 0.187186822 0.180021405 0.173045635 0.166463181 0.160408944 0.155000508 0.150200889 0.146034092 0.142548352 0.139637172 0.137275055 0.135403618 0.133961499 0.132931545 0.132298872 0.132012025 0.132028997 0.132298708 0.132793084 0.133517027 0.134415835 0.135435775 0.136596188 0.137881115 0.13925989 0.140688345 0.142163277 0.143678308 0.145220771 0.146758452 0.148291633 0.149833694 0.151397794 0.15295352 0.154483616 0.156028211 0.157583833 0.159144431 0.160705015 0.162262306 0.163795486 0.165347517 0.16689378 0.168411225 0.16989544 0.171370745 0.172817156 0.174210981 0.175570622 0.17689845 0.178155974 0.17933324 0.180426866 0.181445867 0.182373554 0.183211744 0.183946118 0.184576005 0.185091138 0.185469076 0.185709253 0.185821488 0.185793549 0.185628876 0.185314819 0.184901163 0.18438679 0.183758438 0.183035359 0.182231665 0.181353003 0.180428207 0.179450527 0.178410634 0.177348867 0.176240966 0.175097421 0.173976198 0.172892809 0.171820611 0.170767069 0.169750646 0.168802321 0.167883471 0.166967854 0.16608128 0.165254861 0.164459199 0.163720667 0.163041592 0.162383452 0.161791354 0.161255926 0.160775736 0.160344005 0.159969077 0.159611315 0.159273788 0.158905819 0.158572569 0.158308774 0.15808478 0.157862738 0.157664597 0.157541215 0.157487929 0.157505915 0.157569319 0.157644942 0.157742456 0.157874271 0.158039302 0.158218816 0.158425048 0.158630461 0.158837378 0.15903984 0.159277841 0.159533486 0.159794047 0.160075143 0.160388038 0.160760999 0.1611837 0.161601588 0.162040561 0.162515178 0.162990719 0.163466185 0.16399388 0.16453661 0.165048748 0.165549994 0.166031748 0.166524157 0.167016506 0.167490393 0.167952463 0.168407962 0.168865055 0.169338882 0.169781014 0.170215741 0.170702204 0.171157554 0.171611086 0.172092944 0.172579333 0.173021644 0.17344588 0.173864126 0.174266219 0.174669087 0.175064504 0.17543678 0.175795853 0.176117301 0.176388383 0.176610842 0.176765636 0.176781803 0.176708102 0.176563635 0.176291913 0.175856948 0.17525813 0.174527958 0.173665062 0.17264697 0.171437308 0.170051768 0.168556571 0.166994944 0.165353954 0.163678169 0.161969647 0.160218135 0.158452898 0.156783268 0.15524143 0.153724164 0.15225099 0.150861517 0.149532929 0.148294538 0.14713183 0.146107927 0.14526549 0.144567281 0.144046634 0.143700689 0.143539339 0.143526033 0.143596113 0.143736258 0.143831342 0.143844858 0.143765047 0.143551469 0.143212661 0.142735124 0.14213109 0.141446084 0.140711918 0.139931738 0.139099911 0.13829127 0.137581557 0.136958569 0.13640742 0.135915771 0.135553986 0.135254741 0.134921998 0.13455902 0.134189487 0.133855537 0.133547693 0.133232072 0.132979602 0.132801592 0.132618412 0.132375851 0.132221475 0.132116377 0.132067516 0.132016629 0.131974444 0.132040858 0.132196158 0.132309735 0.132413879 0.132485747 0.132569015 0.132616505 0.132595316 0.132515699 0.132477939 0.132447705 0.13239117 0.132355869 0.132318199 0.132311851 0.132223755 0.132161677 0.132203504 0.13214314 0.132063508 0.132047072 0.131980062 0.131859437 0.131708965 0.131540045 0.131304651 0.130941629 0.130494073 0.130050451 0.129561797 0.12880075 0.128063694 0.127415985 0.126729697 0.125969723 0.125129223 0.12437351 0.123506568 0.122466341 0.121471353 0.12047825 0.119364426 0.118198127 0.117105253 0.116171405 0.115065783 0.113795057 0.112649158 0.111523755 0.110283449 0.109059319 0.108005591 0.107093416 0.106067836 0.104842938 0.103860296 0.102912322 0.101781532 0.100716032 0.099752359 0.099012896 0.098207578 0.097369991 0.096654952 0.09587615 0.095223829 0.094744503 0.094447024 0.094197541 0.09379527 0.093569249 0.093545429 0.093411863 0.09336818 0.093246371
"5" 0.277312577 0.279998869 0.282722071 0.28537266 0.288051233 0.290718958 0.293376535 0.296055734 0.298749551 0.301463977 0.304135472 0.306778446 0.309419557 0.312101275 0.314752802 0.317359388 0.319880426 0.322373793 0.324908018 0.327455655 0.330141783 0.332691282 0.335272714 0.337868333 0.340443462 0.342884615 0.345362142 0.347887263 0.350370765 0.352819055 0.355229586 0.357609779 0.359996647 0.362329572 0.364626065 0.366881713 0.369025007 0.371302128 0.373463675 0.375606492 0.377742887 0.379813805 0.381731734 0.38370949 0.385698214 0.387583241 0.389413863 0.391284361 0.393062517 0.39479959 0.396436423 0.398112848 0.39965421 0.401218608 0.40270862 0.404103726 0.405354708 0.406556353 0.407745615 0.408841208 0.410029709 0.411239609 0.412369385 0.413478777 0.414535537 0.415623993 0.416697443 0.417834342 0.41898036 0.420205429 0.42137143 0.422540292 0.423720628 0.424734443 0.42583707 0.426724628 0.427759841 0.42879796 0.429876417 0.430850267 0.431849971 0.432776734 0.433640748 0.434415236 0.43503657 0.435590133 0.435932338 0.436162293 0.436214894 0.436280593 0.436292574 0.436218098 0.436064988 0.435862556 0.435681671 0.435448691 0.435362935 0.435123026 0.434987143 0.43485719 0.43474938 0.434910148 0.434981585 0.435282782 0.435652494 0.436032921 0.436714649 0.437206239 0.437745318 0.438401982 0.439106837 0.438031286 0.438760206 0.439491138 0.440230846 0.440965891 0.441710189 0.44252716 0.44339633 0.44414109 0.444987953 0.445829138 0.44667989 0.447531134 0.448382333 0.449216276 0.450065047 0.450937152 0.45175992 0.452531978 0.453370616 0.454226062 0.455047965 0.455831125 0.456670135 0.457494244 0.458277926 0.459070936 0.459877163 0.460708693 0.461499065 0.46224612 0.462991014 0.463716194 0.464453533 0.465189368 0.465956032 0.466675773 0.4673457 0.467982009 0.468601435 0.469186053 0.469767034 0.470339477 0.470808521 0.471216708 0.471643835 0.472025588 0.472338438 0.472642705 0.472899392 0.473093078 0.473230094 0.473296359 0.473287702 0.473201841 0.473037869 0.47274369 0.47234413 0.471834019 0.471206173 0.470382914 0.469436318 0.468300834 0.466914803 0.465347677 0.463596568 0.461576432 0.459369883 0.45699656 0.454454437 0.451762781 0.448920324 0.44598195 0.443025395 0.440014049 0.437039092 0.434172302 0.431463242 0.428887993 0.426439881 0.424187765 0.422143057 0.420304328 0.41862306 0.417018279 0.415483147 0.414024502 0.412640974 0.411241844 0.409854963 0.408522561 0.407250479 0.406073526 0.40496318 0.403995782 0.403165311 0.402455822 0.401891291 0.401504666 0.401243225 0.40110448 0.401110739 0.401240274 0.401528999 0.401973799 0.402553111 0.403299779 0.404243037 0.405348852 0.406568885 0.407854229 0.409167945 0.410488591 0.411806077 0.41308555 0.414329365 0.415531501 0.416697964 0.417801112 0.418844342 0.419800475 0.420688614 0.421505556 0.422240406 0.42288515 0.423495919 0.42406863 0.424564078 0.425018191 0.425433308 0.425794274 0.426102564 0.426407471 0.426734924 0.427081823 0.427466124 0.427889422 0.42830734 0.428774178 0.429269969 0.429776862 0.430295289 0.43079707 0.431228027 0.431600943 0.431909874 0.432145 0.432268426 0.432287902 0.432211027 0.432030067 0.431732178 0.431327283 0.430814832 0.430190608 0.429377094 0.428403869 0.427321866 0.426071674 0.424645483 0.423055366 0.421316028 0.419414982 0.417326659 0.41511485 0.412802801 0.410391837 0.40787065 0.405249834 0.402586937 0.399833769 0.397060946 0.394319639 0.391614094 0.388962179 0.386376202 0.383847862 0.381377727 0.378969029 0.376646847 0.37441422 0.372276708 0.370253414 0.368354812 0.366515398 0.364680767 0.362813517 0.360845476 0.358653441 0.356145576 0.353314847 0.350145549 0.346570298 0.34258613 0.338250369 0.333592147 0.328579932 0.323273584 0.317721441 0.311986431 0.306103662 0.300106108 0.294101924 0.288204312 0.282453358 0.27690126 0.271643952 0.266740307 0.262215704 0.2580356 0.254240423 0.250866354 0.247893624 0.245257623 0.242959984 0.241008036 0.239376798 0.238003336 0.236862667 0.235951021 0.235223457 0.234631464 0.2341647 0.233791716 0.233492076 0.2332322 0.232997842 0.232799023 0.232617952 0.232442863 0.232295454 0.23221349 0.232202068 0.23226589 0.232423723 0.232669614 0.233006351 0.233434021 0.233927675 0.234486327 0.235090792 0.235738993 0.236429192 0.237145044 0.237887941 0.2386664 0.239465646 0.240278676 0.241104998 0.241952896 0.242825642 0.24371545 0.244603671 0.245480478 0.246364556 0.247248545 0.248117521 0.248961769 0.24977231 0.250553623 0.251281738 0.251953512 0.252593465 0.253199548 0.253761068 0.254286572 0.254802495 0.255307466 0.255805805 0.25626862 0.256726623 0.257202089 0.257662848 0.258118436 0.258580163 0.259037122 0.259510621 0.259969547 0.260397807 0.260814786 0.261237681 0.26164715 0.262037829 0.262433738 0.262823179 0.263203815 0.263593018 0.263987884 0.264398664 0.264839917 0.265328601 0.265858129 0.266443357 0.267094016 0.267812923 0.268613458 0.269464076 0.270390391 0.271366686 0.272373676 0.273420453 0.274467856 0.275506541 0.27655381 0.277598724 0.278637677 0.279659674 0.280635744 0.281569511 0.282491073 0.283373356 0.284209356 0.284995586 0.285723478 0.286397859 0.28702116 0.287578076 0.288068205 0.288476571 0.288790151 0.289018512 0.289136022 0.289146811 0.289033115 0.288814053 0.288497597 0.288082242 0.287585109 0.287028581 0.286448002 0.285864592 0.285316631 0.284828857 0.284418643 0.284055918 0.28373073 0.283460498 0.283216715 0.282948419 0.282652795 0.282308728 0.281893045 0.281403288 0.280849382 0.280225903 0.279558182 0.278866842 0.278155819 0.277443871 0.276747227 0.27605252 0.275356442 0.274659142 0.273961797 0.273217484 0.272404343 0.271547601 0.270687193 0.269881368 0.269141182 0.268529683 0.268071741 0.267762557 0.267614707 0.267572924 0.26761952 0.267724946 0.267816976 0.267843336 0.267784551 0.26765804 0.26747936 0.267227292 0.266918242 0.266607493 0.266281843 0.265896186 0.26549311 0.26511617 0.26472719 0.264376521 0.264089182 0.263847813 0.263652757 0.26349479 0.263370484 0.263256624 0.263162851 0.263094947 0.263063058 0.263061255 0.263067365 0.263111085 0.263229877 0.263382509 0.263560772 0.263772666 0.264005885 0.264298379 0.2645908 0.264872074 0.265139088 0.265378118 0.265624434 0.265865535 0.266080737 0.266290024 0.266525179 0.266793132 0.267084107 0.267355144 0.267661959 0.268031865 0.268452823 0.268911779 0.268257111 0.268672481 0.269116357 0.269569755 0.270017222 0.270396709 0.270688578 0.270872533 0.270962253 0.270912781 0.270726249 0.270402327 0.269906104 0.269186318 0.268248796 0.267074645 0.265648559 0.263919175 0.261872724 0.259459212 0.256682321 0.253473721 0.249783888 0.245634735 0.240988918 0.235760801 0.229942009 0.223613642 0.216861658 0.209674641 0.202165522 0.194512136 0.18688073 0.179437473 0.172215752 0.165429033 0.159223139 0.153698072 0.148818508 0.144591227 0.14106445 0.138139725 0.135778837 0.133901559 0.132461749 0.131441191 0.130818017 0.130542792 0.130571604 0.130844623 0.131360978 0.132106051 0.133028388 0.134083509 0.135274082 0.136596963 0.13801413 0.139487728 0.141003363 0.142559066 0.144150659 0.14573998 0.1473253 0.148917124 0.15052826 0.15214514 0.153736927 0.155327737 0.15694467 0.158569239 0.160195477 0.161809422 0.163418286 0.165034279 0.166645721 0.168235332 0.16979707 0.171339333 0.172843955 0.174300529 0.175721563 0.177111119 0.178420208 0.179643914 0.180795237 0.181882069 0.182865553 0.183743604 0.18450471 0.185152315 0.185703196 0.186119497 0.186384335 0.186518885 0.186502479 0.186346106 0.186033748 0.185616255 0.185084969 0.184428714 0.183669209 0.182834715 0.181933299 0.180970475 0.179942772 0.178864188 0.177763067 0.176626168 0.175448619 0.174268954 0.173127972 0.172010496 0.170925185 0.169870712 0.168870382 0.167905219 0.166962668 0.166044623 0.165180758 0.164361231 0.163583614 0.162859209 0.162179142 0.161577813 0.161035761 0.160544552 0.16011069 0.159730181 0.159370884 0.159031279 0.158676155 0.158354677 0.158095911 0.157876231 0.157673202 0.157493226 0.157395899 0.157366052 0.157385826 0.157458998 0.157553151 0.157668144 0.157823548 0.15799994 0.158203565 0.158440314 0.158682361 0.158926047 0.159172237 0.159445949 0.159736805 0.160036132 0.160367213 0.160730436 0.161141567 0.16158735 0.162046783 0.1625425 0.163060226 0.163566269 0.164069787 0.164616466 0.165181033 0.165724717 0.166267969 0.166805238 0.167358659 0.16790197 0.168408699 0.168911047 0.169412442 0.169923827 0.170439184 0.170925729 0.171397172 0.171911798 0.172406584 0.172892295 0.173396803 0.173887789 0.174343042 0.174786314 0.175233625 0.175679006 0.176100381 0.176518321 0.176927142 0.17730286 0.177632183 0.17790705 0.178125061 0.17827823 0.178304926 0.178228557 0.17805995 0.177762829 0.177310683 0.176676057 0.175888874 0.174951032 0.17385783 0.172572657 0.171127096 0.169564322 0.167925373 0.166198492 0.164427966 0.1626366 0.160814568 0.158981353 0.157232024 0.155592106 0.154001333 0.15247371 0.151005372 0.149618834 0.148328394 0.147126719 0.146066725 0.14517872 0.144448385 0.143913001 0.143575251 0.143425055 0.143433549 0.143532358 0.143672779 0.143784858 0.143841282 0.14377176 0.143563159 0.143251933 0.142793857 0.142169721 0.141469881 0.140732348 0.139935017 0.139068596 0.138243303 0.137517214 0.136860274 0.136280209 0.135780439 0.135403067 0.135091171 0.134752586 0.134393103 0.134010419 0.133655533 0.133334093 0.133005567 0.132751748 0.132573768 0.132383034 0.132149592 0.131993398 0.131904535 0.131878778 0.131856821 0.131809771 0.131846517 0.13196101 0.132083677 0.132216111 0.132298984 0.132337332 0.132352903 0.132342428 0.132285871 0.132265829 0.132211342 0.132108428 0.132054627 0.132017896 0.131994218 0.131924547 0.131861642 0.131858788 0.131791562 0.131708376 0.131690606 0.131652191 0.131537326 0.131393358 0.131217062 0.130974121 0.130606368 0.130154401 0.129693493 0.129177801 0.128420562 0.127699427 0.127076216 0.126351491 0.125569403 0.124723651 0.123869851 0.122917891 0.121863194 0.120883975 0.119877275 0.118744992 0.117574289 0.116456751 0.115480274 0.11436918 0.113105692 0.111943163 0.110836808 0.109680295 0.108529493 0.10740849 0.106325798 0.105287507 0.104093164 0.103074692 0.102104418 0.100949008 0.099903908 0.099001583 0.098224282 0.097397376 0.096527945 0.095826145 0.095192868 0.094589479 0.093987323 0.093573865 0.093415827 0.093105726 0.092787117 0.09268086 0.092678845 0.092648931 0.092460964
"6" 0.266682982 0.269388109 0.272114187 0.274804145 0.277533352 0.280259401 0.282992035 0.285706818 0.288481355 0.291280329 0.294031084 0.296776801 0.299518168 0.302340686 0.305106878 0.307826012 0.310476661 0.313137323 0.315850168 0.318570137 0.32138595 0.324099451 0.326838017 0.32959947 0.332306027 0.334924877 0.337595254 0.340276927 0.342929423 0.345567584 0.348171949 0.350755006 0.353311688 0.355826288 0.358301073 0.360800952 0.363133401 0.365592659 0.367937952 0.370285898 0.37260288 0.374830157 0.377009392 0.379209757 0.381375849 0.383438617 0.385455906 0.387517899 0.389476597 0.391436547 0.393247306 0.395069718 0.396821469 0.398513794 0.400196254 0.401757717 0.403181136 0.404545873 0.405874014 0.407154143 0.40842393 0.409759074 0.410995752 0.412251323 0.413386375 0.414547801 0.415743202 0.416967779 0.418162405 0.419454575 0.420741677 0.422014058 0.423282802 0.424390733 0.425616324 0.426539183 0.427729517 0.428869098 0.429966986 0.43102926 0.432075799 0.432990849 0.433905244 0.434691668 0.435275197 0.435810387 0.436132699 0.436366975 0.436333746 0.436330944 0.436229467 0.436029881 0.435761899 0.435462266 0.435194135 0.434771031 0.434512317 0.434222937 0.434010923 0.433678031 0.433454454 0.433421135 0.43355599 0.433742136 0.434059501 0.434408844 0.434982449 0.435427248 0.435905755 0.436574161 0.437204123 0.436176717 0.436919272 0.437658995 0.438444316 0.439204544 0.439957976 0.440817058 0.441774309 0.442592144 0.4434793 0.444329321 0.445253909 0.446172744 0.447068572 0.447961479 0.448831797 0.449721038 0.450602502 0.451392829 0.452246189 0.453104824 0.453910708 0.454685301 0.455493689 0.456309706 0.457102001 0.457884908 0.458671033 0.459493548 0.460263819 0.461008668 0.461756557 0.462506145 0.463263631 0.464020818 0.464793056 0.465541393 0.466310591 0.46704784 0.467743337 0.468423814 0.46907115 0.469751388 0.47033605 0.470830232 0.471344471 0.471803606 0.472202241 0.472616553 0.472970814 0.473226458 0.473410636 0.473540962 0.473589659 0.473534912 0.473375678 0.473077029 0.472662419 0.472078532 0.471355498 0.470417202 0.469297945 0.467971325 0.466381729 0.46460855 0.462635338 0.460394204 0.457965583 0.455370188 0.452612817 0.449697345 0.446623594 0.443448007 0.440245926 0.43697536 0.433738619 0.430603504 0.427639127 0.424833417 0.422194868 0.419760406 0.417533636 0.415537804 0.413721561 0.412014127 0.410399586 0.408862978 0.407380223 0.405892074 0.404417276 0.403014243 0.401676834 0.400402576 0.399206549 0.398153633 0.397258878 0.396488518 0.395862937 0.395412713 0.395099282 0.394911885 0.394870609 0.394948393 0.39518404 0.395583779 0.396122575 0.396832943 0.397759616 0.398835868 0.400034308 0.401316196 0.402648121 0.403982311 0.405320078 0.406630337 0.407907665 0.409139961 0.410345256 0.411494702 0.412584603 0.413602531 0.414537966 0.415382951 0.416162521 0.416871965 0.417516947 0.418114483 0.418645531 0.419125885 0.419569731 0.419964433 0.420323431 0.420685172 0.421043247 0.421432078 0.421852291 0.422300994 0.422742397 0.423235953 0.423743248 0.424261242 0.424785525 0.425276101 0.425699532 0.426068842 0.426363051 0.426563174 0.426671207 0.426692247 0.426651806 0.426523268 0.426295042 0.425972581 0.425550252 0.42501995 0.424297839 0.423414201 0.422407299 0.421235859 0.419890732 0.418351084 0.416638613 0.414735675 0.412620425 0.410344899 0.407933563 0.405399501 0.402721286 0.399926126 0.397064239 0.394104749 0.391103357 0.38813898 0.385204554 0.382316083 0.379497498 0.376712233 0.373992771 0.371348858 0.368787885 0.366330475 0.363992542 0.361800373 0.359741777 0.357772529 0.355838329 0.35388279 0.351827115 0.349541098 0.346922457 0.343974173 0.340674371 0.336940885 0.332787156 0.328281462 0.323417902 0.318164557 0.312607825 0.30679816 0.300803244 0.294664741 0.288419485 0.282179832 0.276048064 0.270088494 0.264335901 0.258883834 0.253803939 0.249120995 0.244792506 0.240854621 0.237340018 0.234236374 0.231483459 0.229075462 0.227020994 0.225294903 0.223830506 0.222602248 0.22161904 0.220824122 0.220157295 0.21962148 0.219187155 0.218833864 0.218525603 0.218248427 0.218013018 0.217783272 0.21756722 0.217383549 0.217259988 0.217210293 0.217235804 0.217350006 0.21754761 0.217840135 0.218223065 0.218668222 0.219185129 0.219761834 0.220388189 0.221063465 0.221765757 0.222495884 0.223260492 0.224046081 0.224858731 0.22569178 0.226538166 0.227407843 0.228310987 0.229218587 0.230101183 0.230995208 0.23189804 0.232776001 0.233635917 0.234452054 0.23524183 0.235968456 0.236628324 0.237265483 0.237871096 0.238436177 0.238955125 0.239465043 0.239963651 0.240438804 0.240890205 0.241349295 0.241833091 0.242299214 0.242755234 0.243225023 0.243695512 0.244175866 0.244652808 0.245104194 0.245542184 0.245986536 0.246408522 0.24680306 0.247215658 0.2476172 0.248009533 0.248399928 0.248807132 0.249226809 0.249676153 0.250172317 0.250729352 0.251347363 0.252029777 0.252794981 0.253659785 0.254584253 0.255584896 0.256630987 0.257688761 0.258790433 0.259905964 0.261017174 0.262131721 0.263248771 0.264352828 0.265440643 0.26649332 0.267509043 0.268507928 0.269438297 0.270324826 0.27115196 0.27192679 0.272662371 0.273319244 0.273898691 0.274428278 0.274876535 0.27521655 0.275456011 0.275580019 0.275596023 0.275472403 0.27523005 0.274882466 0.274426103 0.273886055 0.273282111 0.272648007 0.272023231 0.271435767 0.270904183 0.270462424 0.270102084 0.269796729 0.269539833 0.269322366 0.269091666 0.268832058 0.268527418 0.268157363 0.267714679 0.267200768 0.266615808 0.265973121 0.265297502 0.264607638 0.263911009 0.263214231 0.26251784 0.261810839 0.261086822 0.260363966 0.259596497 0.258764178 0.25787288 0.256981075 0.256161571 0.255418897 0.254822165 0.254390746 0.254105777 0.253972948 0.253954798 0.25401184 0.254112005 0.254205555 0.254239023 0.254184008 0.254029661 0.253819168 0.253537983 0.253195554 0.252828687 0.252442539 0.25200507 0.251542538 0.251110494 0.2506859 0.250282586 0.249939293 0.249654144 0.249416783 0.24922666 0.249074638 0.248938903 0.248836637 0.248771012 0.248728871 0.248703629 0.248718441 0.248768374 0.248894587 0.249066934 0.249261364 0.249487996 0.249727756 0.250020742 0.250338703 0.250626326 0.2508955 0.251143306 0.251379192 0.25163123 0.25186348 0.25207305 0.252315044 0.252592921 0.252889156 0.253174216 0.253495246 0.253866553 0.254264086 0.25471729 0.254051328 0.254500806 0.254983515 0.25548014 0.255930364 0.256347179 0.25670442 0.256941468 0.257046044 0.257019579 0.256853104 0.256526649 0.256044537 0.255348235 0.254426509 0.253253341 0.25184086 0.250128061 0.248086095 0.245665833 0.242888644 0.239688069 0.236018956 0.231908381 0.227322683 0.222193226 0.216495574 0.210306525 0.203703329 0.196707726 0.189403206 0.181980491 0.174601823 0.167434141 0.160498187 0.153982773 0.148041636 0.142756104 0.138091221 0.134074852 0.130691007 0.1278698 0.125577435 0.123743601 0.12230996 0.121275164 0.120645858 0.12032 0.120235361 0.120409682 0.120814241 0.121414661 0.122172065 0.123079732 0.12411955 0.125308678 0.126580298 0.127903968 0.12924996 0.13068296 0.132168278 0.133628532 0.135095075 0.136573091 0.138082311 0.13958551 0.141074389 0.142563611 0.144090921 0.145615384 0.147151619 0.148669526 0.15020597 0.151739731 0.153262213 0.154764205 0.156256169 0.157748416 0.159209237 0.160615385 0.161987185 0.163335234 0.164613426 0.165816322 0.166940361 0.168008357 0.168974832 0.169815898 0.170570567 0.171220303 0.171752885 0.172174826 0.172457784 0.17261824 0.1726152 0.172472596 0.172193378 0.171827942 0.171340317 0.170721948 0.169995517 0.169189051 0.168321699 0.167406708 0.166420951 0.165370688 0.16429989 0.163217574 0.162080839 0.160932332 0.159833536 0.158756897 0.157703504 0.156661794 0.155677825 0.154739261 0.153828964 0.152952358 0.152116805 0.151339471 0.150601119 0.149910152 0.149241552 0.1486644 0.148165345 0.147710189 0.147295311 0.146928981 0.146582663 0.146260783 0.145931661 0.145646155 0.1454041 0.145191699 0.145022899 0.144881919 0.144791976 0.14476721 0.144788265 0.144850805 0.144973159 0.145156443 0.145341501 0.145525411 0.145728827 0.145984605 0.146266326 0.146540642 0.146800637 0.147079945 0.14738518 0.14769572 0.148023769 0.148405194 0.148845583 0.149320751 0.149791032 0.150287509 0.150824353 0.151363224 0.15189594 0.15245232 0.153023675 0.153561845 0.154096574 0.154616714 0.1551442 0.155693352 0.156204775 0.156711012 0.157205731 0.157717913 0.158206865 0.158681363 0.159161061 0.159658998 0.160153061 0.160642326 0.161120519 0.161581039 0.162027866 0.162468389 0.162911028 0.163337708 0.163757175 0.16415295 0.164517894 0.16485402 0.16515179 0.165419132 0.165612131 0.16569452 0.165660948 0.16553469 0.165298522 0.164921686 0.164408132 0.163747132 0.162922099 0.161931962 0.160806969 0.159535527 0.158080891 0.156540453 0.154912636 0.153175443 0.15146257 0.149782941 0.148036346 0.146309361 0.144694895 0.143147692 0.141684264 0.140294686 0.138919443 0.137604967 0.136389703 0.135291159 0.134328872 0.133473262 0.132781208 0.132293373 0.131974235 0.131850004 0.131862402 0.131954223 0.132062197 0.132143497 0.132181749 0.132112533 0.131900579 0.131579995 0.131141961 0.130528033 0.129831389 0.129134089 0.128364265 0.127543643 0.126755252 0.126032129 0.125435501 0.124884933 0.124372587 0.123954147 0.123627178 0.123320289 0.122901231 0.122502342 0.122205406 0.121901624 0.121586993 0.121321991 0.121153407 0.121000819 0.120816387 0.120688424 0.120629922 0.120656833 0.120672815 0.120609075 0.120619431 0.120701618 0.120732725 0.120809965 0.120899335 0.120911919 0.120901823 0.120888866 0.120854296 0.120800175 0.120761164 0.120702691 0.120680839 0.120604277 0.120527312 0.120504022 0.120470256 0.120433874 0.120445572 0.12043114 0.120392755 0.12031585 0.120097391 0.119932532 0.119828217 0.119636133 0.119315058 0.118855737 0.118354417 0.11784371 0.117166229 0.116505824 0.115906872 0.115164869 0.114330947 0.113589242 0.112859897 0.112021923 0.111127071 0.110222884 0.109300509 0.108285606 0.107234046 0.106161408 0.105180174 0.104221664 0.103122048 0.102026433 0.10098318 0.099992722 0.098915935 0.097842604 0.096926026 0.096029498 0.095001467 0.094016567 0.093024932 0.092108987 0.091172621 0.090354085 0.08967711 0.088925965 0.08822614 0.087679796 0.087129049 0.08640413 0.085692801 0.085466921 0.085322142 0.084999718 0.084833264 0.08490181 0.084885538 0.08464276 0.084576882
"7" 0.303290039 0.30607456 0.308922768 0.311672568 0.314463228 0.317253351 0.320042282 0.322863758 0.32569021 0.328571141 0.33136642 0.334155053 0.336930245 0.339801192 0.342656851 0.345365018 0.348066539 0.350707293 0.353437155 0.356183618 0.359048158 0.361831695 0.364624351 0.367440641 0.370231777 0.372901231 0.375581354 0.378338337 0.38104704 0.383743793 0.386400372 0.389047176 0.391617537 0.394195914 0.39677161 0.399256796 0.401650578 0.40417102 0.406587064 0.409008265 0.411408395 0.413698018 0.415913463 0.418149769 0.420372397 0.422515601 0.424592137 0.426742136 0.428726703 0.430746406 0.432633191 0.434546769 0.436319739 0.438082367 0.43980515 0.441400707 0.442872614 0.44420439 0.445584685 0.44691354 0.448231667 0.449606329 0.450883538 0.452205032 0.453416228 0.454652548 0.455895603 0.457231134 0.458543956 0.459921658 0.461302727 0.462653458 0.464055806 0.465192795 0.466458857 0.467458427 0.468686223 0.469902575 0.471069127 0.47224474 0.473382831 0.474425644 0.475388408 0.476281375 0.476941675 0.477564812 0.477912098 0.478168696 0.478231877 0.478240728 0.478169382 0.477944225 0.477702379 0.477419496 0.47710678 0.476736099 0.476473689 0.476205617 0.475916445 0.47563073 0.475470752 0.475483894 0.475525111 0.475751877 0.476108581 0.476546794 0.47722587 0.477818668 0.478336275 0.479012609 0.479695439 0.478563577 0.479435056 0.480256051 0.481072515 0.481863499 0.482720822 0.48367545 0.484695792 0.485580564 0.486540616 0.487467855 0.488447726 0.489436984 0.49039048 0.491353422 0.49231714 0.493275046 0.49421072 0.495116949 0.496094197 0.49705562 0.498004884 0.498924494 0.499875695 0.500787497 0.501708031 0.502644241 0.503611505 0.504607558 0.505505323 0.506421745 0.507330835 0.50820452 0.509084523 0.50997752 0.510881782 0.511709869 0.512527943 0.513318956 0.514055789 0.514727771 0.515393615 0.516064525 0.516594291 0.517028272 0.517476082 0.517890036 0.518235624 0.518536866 0.518770933 0.518930554 0.518992841 0.518994272 0.518911839 0.518722355 0.518412352 0.517944932 0.51736474 0.516649306 0.515782714 0.514675021 0.513365686 0.511870444 0.510097146 0.508139014 0.505972326 0.50351119 0.500832736 0.497995257 0.494971812 0.491792291 0.488459796 0.48498553 0.481491119 0.477935016 0.474409878 0.470995784 0.467771471 0.464717984 0.461824954 0.459155083 0.456746995 0.454573214 0.452589035 0.450716972 0.448948115 0.447257042 0.44565019 0.444030553 0.442413628 0.440845907 0.439337909 0.437934041 0.43661797 0.435471565 0.434484899 0.433626771 0.432920218 0.432407677 0.432054639 0.431831509 0.431762934 0.431851387 0.432111382 0.432527542 0.433105618 0.433883727 0.434872001 0.436030149 0.437320888 0.438717961 0.440157533 0.441610038 0.443083853 0.444519371 0.445922554 0.447300315 0.448633552 0.449892789 0.451103538 0.452209979 0.453223646 0.454163432 0.45501259 0.455764592 0.456462681 0.457127362 0.457719237 0.458255917 0.45872733 0.459142506 0.459497809 0.459837079 0.460200399 0.460580498 0.461004764 0.461475611 0.461972207 0.462542951 0.463151604 0.463793159 0.464462399 0.465111405 0.46569401 0.46620965 0.466648817 0.466985524 0.467217892 0.467309564 0.467273563 0.467088342 0.466753572 0.466272652 0.465617388 0.464811265 0.463775605 0.462539464 0.461159855 0.459599912 0.457820773 0.45582971 0.453663319 0.451328993 0.448779643 0.446064502 0.443261802 0.440336645 0.437276483 0.434113383 0.430912673 0.427600056 0.424277872 0.42099461 0.417750657 0.414571375 0.411472678 0.408443868 0.40548566 0.402606875 0.399820954 0.397147775 0.394614577 0.392243087 0.390036404 0.387922704 0.385839701 0.383731604 0.381514102 0.379045546 0.376217723 0.373011559 0.36942625 0.3653768 0.360853404 0.355936885 0.350632876 0.344906628 0.33884877 0.3325167 0.325977832 0.319282472 0.312478334 0.30567798 0.298992038 0.292489886 0.286227405 0.280298948 0.27476722 0.269657463 0.264943719 0.260659158 0.256838113 0.25347057 0.250480711 0.247861281 0.245634124 0.243761674 0.242160857 0.2408306 0.239758417 0.238880903 0.238163143 0.237592787 0.237130955 0.236754999 0.236430079 0.236143738 0.23589474 0.23565048 0.235415086 0.235215724 0.235079005 0.235013679 0.235026374 0.235136271 0.235343397 0.235644072 0.236044168 0.236526191 0.237072736 0.237676963 0.238342956 0.239055529 0.23980163 0.240580291 0.241397262 0.242250055 0.243126839 0.244015664 0.244918287 0.245838061 0.246790141 0.24774453 0.248674318 0.249613196 0.250570774 0.251517534 0.252431899 0.253294408 0.254130512 0.254910856 0.255631775 0.256321251 0.256956011 0.257540733 0.258086056 0.258617908 0.259128988 0.259631246 0.260121197 0.260620981 0.261120528 0.261592686 0.262072712 0.262574404 0.26307264 0.263576448 0.264078587 0.264546305 0.264988452 0.265448064 0.265889764 0.266303629 0.266723633 0.267131805 0.267542213 0.267954767 0.268379599 0.268823206 0.269289434 0.269806653 0.270387024 0.271047503 0.27177918 0.272583574 0.273484141 0.274464309 0.275526822 0.276640922 0.277780801 0.278960109 0.280148029 0.281336516 0.282543451 0.283746332 0.284940451 0.28611508 0.287243903 0.288327515 0.289386481 0.290410072 0.291393191 0.29230845 0.293165356 0.293958068 0.29468286 0.295335144 0.295917511 0.296408474 0.296796113 0.297081739 0.297250003 0.297280818 0.297174394 0.296955556 0.296612948 0.296161234 0.295598179 0.294953078 0.294294447 0.293616474 0.292967379 0.292403936 0.291944057 0.291545987 0.291193902 0.290889025 0.290605724 0.290335447 0.290045619 0.289700478 0.289273083 0.288777858 0.288218439 0.28757453 0.286859155 0.286102921 0.285339266 0.284563601 0.283778697 0.283014566 0.282248467 0.28146258 0.280675441 0.279844671 0.27894038 0.277970195 0.276991308 0.276075006 0.275249332 0.274580508 0.274070382 0.273734361 0.273570418 0.2735309 0.273587286 0.273694962 0.273800284 0.273847103 0.273807019 0.273662388 0.273447961 0.273163974 0.272811681 0.272442788 0.272061855 0.271624535 0.271137774 0.270668894 0.270216316 0.269798219 0.269464076 0.26918754 0.268958867 0.268781841 0.268632501 0.26849848 0.268429041 0.268360049 0.268307209 0.268298477 0.268332452 0.268396109 0.268520713 0.268711805 0.268928766 0.26918456 0.269449294 0.269754767 0.270088196 0.270407379 0.270724118 0.271005124 0.271272928 0.271544129 0.271790057 0.272043407 0.272312105 0.272599429 0.272910088 0.273200929 0.273540825 0.273973823 0.274455965 0.27493152 0.274221212 0.274684519 0.275194734 0.275714278 0.276222318 0.276659995 0.277011365 0.277267724 0.277439415 0.277438343 0.277267277 0.276936471 0.276416332 0.275655031 0.274660796 0.273397684 0.271836966 0.269938439 0.267695516 0.265073001 0.262033463 0.258524597 0.254529506 0.250067323 0.245088518 0.239521578 0.233343542 0.226642996 0.219531596 0.212003037 0.204151273 0.196180269 0.188249975 0.180549502 0.173086211 0.166084006 0.159692943 0.154014483 0.1490051 0.144656777 0.140996367 0.137954712 0.135484472 0.133508101 0.131972 0.130853325 0.130167454 0.129813224 0.12972109 0.129888222 0.130313188 0.130977869 0.13183108 0.13281481 0.13393943 0.135220051 0.136576101 0.137992412 0.139455855 0.140998229 0.142568812 0.144134596 0.145709932 0.147276983 0.14886184 0.150465176 0.152048722 0.153632417 0.155246824 0.156871885 0.1585024 0.16013895 0.161783382 0.163412184 0.165013731 0.166614681 0.168225065 0.169824302 0.171364099 0.172867209 0.174331158 0.175758928 0.177112103 0.178396881 0.179588377 0.18069981 0.181719273 0.182611883 0.183371693 0.184028208 0.184585527 0.185017064 0.185264319 0.185375899 0.185352951 0.185154527 0.18479678 0.184325412 0.183760881 0.183058649 0.182244763 0.181335106 0.180367708 0.179315358 0.178190768 0.177035332 0.175828636 0.174621344 0.173369661 0.172100037 0.170899436 0.169724122 0.168581128 0.167456269 0.166401893 0.165404901 0.164445534 0.16349344 0.162574589 0.16173172 0.160941198 0.160198063 0.159509525 0.158888519 0.158344671 0.157851636 0.157415435 0.157019481 0.156654119 0.156312585 0.155993268 0.155693322 0.155441597 0.155234158 0.155019507 0.154863864 0.154799208 0.154751137 0.154753774 0.154826358 0.154934406 0.155075938 0.155253351 0.155454636 0.155694544 0.155944616 0.156216651 0.156504661 0.156813696 0.157111242 0.157406703 0.157718182 0.15807727 0.158480942 0.158913895 0.159389362 0.159887001 0.160398692 0.1609485 0.161504164 0.162039131 0.162623212 0.163217574 0.163800269 0.164404407 0.164968446 0.165515617 0.166082621 0.166630536 0.167162299 0.167677104 0.168207139 0.168731093 0.169243172 0.169780523 0.170308009 0.170820177 0.171335191 0.171813816 0.172321662 0.172834441 0.173319668 0.173819482 0.174313545 0.174752325 0.175151557 0.175569981 0.175954998 0.176286176 0.176569074 0.176779136 0.176910833 0.176891923 0.176741347 0.176521823 0.176180184 0.175656393 0.174966216 0.174123645 0.173143744 0.171989441 0.170630902 0.169109225 0.167489171 0.165785432 0.16397348 0.162128061 0.160284996 0.158439025 0.156644508 0.154898733 0.153212517 0.151604012 0.150053799 0.14857775 0.147221044 0.145942017 0.144745857 0.143703431 0.142811269 0.142080754 0.141543284 0.141209543 0.141068384 0.141030982 0.1411165 0.141242117 0.141342506 0.141391665 0.141301081 0.141058236 0.140684366 0.140199393 0.139547214 0.13878046 0.137984246 0.137152597 0.136296928 0.135446191 0.134697065 0.134055227 0.133496255 0.133020848 0.132610589 0.132272288 0.131924033 0.131541029 0.131200582 0.13087295 0.130539596 0.130224511 0.129966408 0.129781306 0.129578441 0.129360437 0.129218563 0.129124478 0.129041195 0.128990784 0.128905654 0.12893346 0.129110977 0.129196122 0.129260555 0.12933743 0.129398242 0.129469365 0.129496247 0.129496485 0.129496455 0.129456162 0.12938486 0.129348397 0.129355922 0.129357085 0.129333884 0.129246876 0.129209265 0.12918812 0.129153863 0.129153341 0.129062518 0.128878593 0.128744453 0.128608838 0.128415093 0.128034934 0.127556518 0.127139837 0.126653671 0.12598604 0.125323474 0.124651559 0.123971604 0.123119973 0.122214943 0.121474423 0.120650195 0.11956083 0.118476883 0.117560491 0.116619989 0.11548803 0.114328422 0.113293923 0.112219304 0.110949747 0.10978502 0.108779781 0.107666902 0.106508762 0.105402082 0.104481205 0.103519104 0.102324031 0.101374716 0.100530609 0.099408917 0.098307066 0.097420216 0.096651085 0.095941015 0.095101476 0.094412163 0.093826704 0.093215033 0.092656709 0.092283219 0.092033856 0.091751359 0.091341153 0.09121795 0.091252424 0.091172799 0.091058932
"8" 0.319163114 0.322083741 0.325021297 0.327855021 0.330625772 0.333378047 0.336188138 0.339042902 0.342042178 0.34503901 0.347909451 0.350702882 0.353625238 0.356580764 0.359429479 0.362046361 0.364268094 0.366197467 0.368360609 0.371126503 0.374288499 0.377135515 0.380177438 0.383260369 0.386146724 0.388813257 0.391682148 0.394697845 0.397703707 0.400666803 0.403443545 0.40615651 0.408804536 0.411349952 0.413775682 0.416058242 0.418129265 0.420602649 0.42313087 0.425756663 0.428330302 0.430506498 0.432442963 0.434511453 0.43671158 0.438961416 0.441069633 0.443188012 0.445127994 0.44701913 0.448857993 0.450652838 0.452339888 0.454021096 0.455633819 0.456964195 0.457898229 0.458611161 0.459211349 0.459895074 0.461048156 0.462389648 0.463654369 0.464865357 0.465842187 0.466663599 0.467638165 0.468971133 0.470361114 0.471894324 0.47334066 0.474680245 0.475765735 0.476123571 0.476248324 0.476060748 0.476220936 0.476759583 0.477634549 0.478762537 0.48000741 0.481262088 0.482253581 0.482991934 0.483633667 0.48426187 0.484747946 0.485126495 0.485281318 0.485481054 0.485629261 0.485854179 0.486090273 0.486151338 0.48609212 0.48592943 0.485895872 0.485695362 0.485459507 0.485268325 0.485206783 0.485458314 0.485637128 0.486046076 0.486635804 0.487062037 0.487805873 0.488308847 0.488785565 0.489377081 0.490065634 0.489004761 0.48978442 0.490555197 0.491315216 0.4920322 0.492787838 0.493652314 0.494605154 0.495427638 0.496313155 0.497202516 0.49809736 0.499002904 0.499891996 0.50072062 0.501612902 0.502517164 0.50341922 0.504289746 0.505212247 0.506102026 0.50702256 0.507884026 0.508754313 0.509630561 0.510532916 0.511399686 0.512254596 0.513156712 0.514042318 0.514884472 0.515684485 0.51647085 0.517302334 0.518125653 0.518972158 0.51970911 0.520425439 0.521106958 0.521710992 0.522234201 0.522748351 0.523274124 0.523635626 0.523896098 0.524130344 0.524305224 0.524396479 0.524443388 0.524393737 0.524242878 0.524008036 0.523623109 0.523095965 0.522399187 0.521495819 0.520407498 0.519230306 0.517941236 0.516606808 0.515175343 0.513651133 0.51201272 0.510160089 0.508186698 0.506041229 0.503605843 0.500992298 0.498199403 0.49518317 0.491963327 0.48857671 0.485101968 0.481650501 0.478174776 0.474783182 0.471574396 0.468553931 0.465700954 0.462996364 0.460492641 0.458228141 0.456170529 0.454264641 0.452442259 0.450691998 0.448982328 0.447335958 0.445678234 0.444001526 0.442390651 0.4408665 0.439454168 0.438118666 0.436965942 0.43598634 0.435132116 0.434401751 0.433847725 0.433439702 0.433159649 0.433046132 0.433086306 0.433311999 0.433719128 0.434291422 0.435055017 0.436049372 0.437210649 0.438508451 0.439910501 0.441365868 0.442822486 0.444275826 0.445721716 0.447129995 0.448490769 0.449809611 0.451053798 0.452228934 0.45331943 0.454331934 0.455244362 0.456048727 0.456763268 0.457421482 0.458006829 0.458497196 0.458915353 0.459244192 0.459510267 0.459737659 0.459986061 0.460268795 0.46062392 0.461060286 0.461568236 0.462096304 0.462685317 0.463308305 0.463961661 0.464628994 0.465275764 0.465840638 0.466339707 0.466749012 0.467032343 0.467163861 0.467137218 0.466972709 0.466644138 0.466148287 0.465491116 0.464659274 0.463690817 0.462483138 0.461086571 0.459552467 0.45784381 0.455905944 0.453743905 0.451380908 0.448825866 0.446073502 0.44319272 0.440244347 0.437212825 0.434058219 0.430765301 0.427379727 0.423845023 0.420244098 0.416662246 0.413142979 0.409744382 0.406488597 0.403332561 0.400285304 0.397343457 0.394515157 0.391831338 0.389293283 0.386913657 0.384713829 0.382627219 0.38056621 0.378475368 0.376262516 0.373784214 0.37094745 0.367742836 0.364149451 0.360093981 0.35556525 0.350625098 0.345299333 0.339551896 0.333460987 0.327096522 0.320518076 0.313772708 0.306919903 0.300074011 0.293352246 0.286803156 0.280490398 0.274517417 0.268942744 0.263799369 0.259052515 0.254747033 0.250916868 0.247522965 0.244509518 0.241881669 0.239640579 0.237748086 0.236142144 0.234806523 0.233729616 0.232873738 0.232178509 0.231624454 0.231183499 0.230836511 0.230543777 0.230293915 0.230071738 0.229838848 0.229594916 0.229367658 0.22918348 0.22906585 0.229033977 0.229124501 0.229328945 0.2296509 0.230066031 0.230556682 0.231134608 0.231762782 0.232444704 0.233190179 0.233984455 0.234822601 0.23569116 0.236575022 0.237486035 0.238412827 0.239340127 0.240289614 0.241269693 0.242254913 0.243226722 0.244205087 0.24519597 0.24617134 0.247108832 0.248004317 0.248872876 0.249696136 0.250444919 0.251141936 0.251799494 0.252420247 0.252999276 0.253555834 0.254097551 0.254623532 0.255116463 0.255619109 0.256137073 0.256640315 0.257137865 0.25765276 0.258161545 0.258663595 0.259169608 0.259641856 0.260086328 0.260539383 0.260969728 0.261366487 0.26175496 0.262146711 0.26253283 0.262927771 0.263346642 0.263796508 0.264286101 0.264826119 0.265413105 0.266079426 0.266825736 0.267655909 0.268584013 0.269573033 0.270648003 0.27177459 0.272928268 0.274131209 0.275336564 0.276547283 0.277774096 0.278999567 0.280224562 0.281443924 0.282595605 0.283701956 0.284800261 0.28583011 0.286814809 0.287744135 0.288608104 0.289410084 0.290135145 0.290782273 0.291351199 0.29182601 0.292192876 0.292468756 0.292627335 0.292655915 0.292545825 0.292314321 0.291966558 0.291499317 0.290936619 0.290297478 0.289620429 0.288953036 0.288325965 0.287768632 0.287295818 0.286882162 0.286516905 0.286191642 0.285897046 0.285591155 0.285269767 0.284901172 0.284464747 0.283956647 0.283369333 0.28271836 0.282014519 0.281249642 0.280469656 0.279684544 0.278886169 0.278085828 0.277287602 0.276479453 0.275669396 0.274826676 0.27392152 0.27293545 0.271940082 0.271025509 0.270194829 0.269514054 0.26899749 0.26865083 0.26848796 0.268426299 0.268456817 0.26856938 0.268655062 0.268691093 0.268653482 0.268516421 0.268302023 0.268023789 0.267684728 0.267331511 0.266946912 0.266487807 0.26601252 0.265554339 0.26508534 0.264635324 0.264268488 0.263963342 0.263696522 0.263465971 0.263302594 0.263145238 0.263000697 0.262895912 0.262829721 0.262798816 0.262793511 0.26282227 0.262908816 0.263027549 0.263182014 0.263347 0.263502657 0.263731062 0.26399219 0.26422891 0.264478683 0.264710397 0.264943361 0.265181154 0.2653822 0.26559937 0.26582706 0.266089171 0.266421586 0.266734332 0.267041743 0.267439902 0.267915666 0.268411696 0.267680705 0.268152863 0.268678486 0.26920712 0.269703388 0.270142257 0.270516574 0.270775467 0.270907342 0.270895511 0.270725965 0.270388275 0.269854933 0.269082814 0.268083125 0.266811669 0.265261352 0.263381124 0.261150062 0.258519024 0.255506009 0.252024323 0.248068362 0.243641108 0.238697886 0.233175516 0.227059677 0.220439821 0.21338971 0.205928192 0.198178753 0.190300971 0.182497293 0.174933076 0.167635962 0.160791919 0.154571101 0.14904359 0.144184485 0.139983296 0.136432469 0.133480668 0.131072879 0.129148304 0.127654344 0.126580104 0.125897527 0.125537649 0.125453427 0.125619248 0.126008138 0.126623183 0.127418861 0.128397211 0.129512489 0.130768582 0.132082984 0.13346903 0.1349103 0.136406958 0.137931764 0.139474452 0.14101997 0.142574117 0.144159734 0.145767897 0.147374719 0.149000436 0.150649086 0.152297705 0.153949142 0.155608833 0.157267645 0.158906743 0.160532311 0.162146479 0.163731232 0.165317684 0.166865319 0.168327212 0.169730663 0.171086907 0.172341511 0.17348811 0.174567357 0.175603196 0.176557451 0.177411795 0.178148642 0.178805143 0.179349601 0.179750592 0.180036873 0.180177003 0.180180952 0.180042729 0.179765508 0.179366693 0.178873569 0.178229824 0.177431807 0.176538706 0.175574243 0.174500346 0.173355371 0.172198296 0.170999706 0.169760406 0.168488532 0.167187914 0.165941179 0.164725482 0.163559198 0.162408009 0.161327571 0.160298645 0.159331203 0.158400148 0.157498837 0.156645074 0.155855343 0.155113816 0.154427499 0.153834164 0.153292462 0.152809128 0.152374804 0.151967093 0.151593357 0.151253521 0.150942773 0.150661483 0.150421321 0.150213227 0.150009051 0.149848521 0.14978686 0.149757147 0.149772301 0.149875119 0.150008261 0.150168031 0.150376126 0.150599062 0.15083614 0.151122734 0.151423365 0.151727945 0.152033389 0.152381182 0.152738646 0.153079629 0.153443962 0.153860703 0.154341251 0.154841647 0.15533486 0.15586184 0.156421289 0.156955495 0.157480955 0.158066109 0.158665076 0.159237936 0.159820378 0.160387069 0.160945132 0.161485046 0.162015811 0.16255261 0.163099274 0.163641006 0.164183438 0.164709151 0.165227056 0.165767387 0.16628328 0.166768134 0.167259738 0.167799041 0.168310821 0.168767765 0.169255167 0.169748202 0.170172274 0.170595855 0.1710089 0.171381101 0.171731949 0.171992451 0.172160372 0.172256589 0.172240436 0.172120765 0.171884283 0.171484992 0.170955062 0.170256838 0.169411287 0.168397501 0.167238384 0.165897042 0.164418355 0.162812233 0.161102369 0.159308106 0.157512814 0.155756891 0.153993532 0.152251691 0.150571644 0.148979709 0.147440791 0.145949543 0.144512117 0.14315325 0.141885534 0.140697673 0.139675274 0.138825506 0.138126835 0.137580499 0.137264609 0.137151927 0.137123913 0.137210384 0.137319818 0.137428224 0.137506187 0.137442783 0.137211859 0.136863232 0.136359096 0.135724798 0.135017946 0.134264424 0.133478582 0.132617801 0.131731987 0.130963996 0.13029936 0.129701972 0.129186317 0.128751487 0.128379434 0.127984464 0.127576351 0.127224892 0.126907572 0.126571894 0.126243874 0.125975102 0.125783965 0.125593752 0.125413746 0.125283003 0.12516509 0.125088841 0.125006139 0.124950707 0.12496274 0.125068262 0.125141323 0.125180975 0.125282377 0.125319734 0.125294626 0.125278369 0.125252634 0.125249252 0.125229746 0.125160009 0.125106245 0.125106782 0.125096932 0.125032872 0.125001729 0.125043288 0.125006884 0.12497472 0.124970376 0.12494421 0.124819301 0.124682114 0.124493994 0.124255039 0.12398167 0.123701692 0.12329407 0.12266928 0.121898025 0.1212366 0.120650031 0.119916089 0.119144261 0.118370928 0.117577009 0.116806023 0.115836553 0.11477904 0.113786198 0.112790242 0.111702427 0.110577695 0.109582007 0.108563848 0.107345819 0.106120385 0.105121449 0.104080327 0.103006423 0.101927616 0.100963235 0.100026995 0.098892085 0.097966343 0.097064532 0.096062452 0.095044136 0.094070435 0.093406819 0.09272784 0.091869392 0.091135755 0.090592645 0.090073198 0.089620709 0.089267619 0.088955402 0.088628873 0.088245057 0.088316679 0.088398583 0.088246897 0.088250615
"9" 0.306064516 0.308860511 0.311686397 0.314451873 0.317198336 0.319951117 0.322726011 0.325506985 0.328416049 0.331284821 0.334087253 0.336878151 0.339697689 0.342597514 0.345429629 0.348086476 0.350580394 0.352929056 0.355420083 0.358170599 0.361142159 0.363934696 0.366866499 0.369734287 0.372537434 0.375185132 0.377971917 0.380831242 0.383648902 0.386451066 0.389129817 0.391771764 0.39438805 0.396943092 0.39940688 0.401797295 0.404018253 0.406517446 0.408957541 0.411432385 0.413896441 0.416143268 0.418180823 0.420321018 0.422522813 0.424684435 0.426736742 0.428849846 0.430807948 0.432726055 0.434548497 0.436369658 0.438098252 0.439812034 0.441458553 0.442929804 0.44411242 0.445209324 0.446227968 0.447244436 0.448481828 0.449796408 0.451063871 0.452321231 0.453409851 0.454431534 0.455559582 0.456860095 0.458193064 0.459626228 0.460951328 0.462302506 0.463505238 0.464275867 0.465001494 0.465455264 0.466184497 0.467109889 0.468096852 0.469220877 0.470431447 0.471519619 0.47244665 0.47325328 0.473938435 0.47452119 0.474930882 0.475246668 0.475284368 0.475465745 0.475456536 0.475491911 0.475498408 0.475380957 0.475184172 0.474936247 0.474864423 0.474588782 0.474400133 0.474143565 0.47408247 0.474153668 0.474336445 0.474722385 0.475133568 0.475513339 0.476193815 0.476656824 0.47717604 0.477874309 0.47856003 0.477458358 0.478273243 0.479047775 0.479837328 0.480592757 0.481397152 0.482294381 0.483251005 0.484058738 0.484942794 0.485834986 0.486775935 0.487654358 0.488540679 0.489431232 0.490334839 0.491245389 0.492142946 0.492941856 0.493830949 0.494741172 0.49566564 0.496499032 0.497394949 0.498300225 0.499128103 0.499988943 0.500888288 0.501822233 0.502682984 0.503519416 0.504315317 0.505114079 0.505924284 0.506731749 0.507531226 0.508293688 0.509013534 0.509705961 0.510346413 0.510943413 0.511530399 0.51206702 0.512512743 0.512860119 0.513184309 0.513455927 0.513658762 0.513831854 0.513930142 0.513942719 0.513845503 0.513669193 0.51337415 0.51293844 0.512379408 0.511658072 0.510812819 0.509852171 0.508791745 0.507568836 0.506200373 0.504670978 0.502933085 0.501051068 0.498978198 0.496626973 0.494091183 0.491396457 0.488498658 0.485430807 0.482196957 0.478856415 0.475499928 0.472113311 0.468785882 0.465576112 0.462551415 0.459682792 0.456953615 0.454432249 0.452137619 0.450065434 0.448155522 0.44633773 0.444597363 0.442925632 0.441339344 0.439732462 0.43811366 0.436566204 0.435097337 0.433732837 0.432437718 0.431312412 0.430361331 0.429544955 0.428860784 0.428367138 0.428011596 0.427786171 0.427714735 0.427789807 0.428041607 0.428465784 0.429061383 0.429843366 0.430833459 0.431980371 0.433259815 0.434646666 0.436067879 0.437499464 0.438935846 0.440347552 0.441699862 0.443018317 0.444316298 0.445530862 0.446679115 0.447751045 0.448732704 0.449610502 0.450415254 0.45113945 0.451802582 0.452396393 0.452905476 0.453358114 0.453736871 0.454055667 0.454341322 0.45463708 0.45494917 0.455294758 0.455704838 0.456176996 0.456658214 0.457200378 0.457775176 0.458370984 0.458992034 0.459602654 0.460139453 0.460596144 0.460969388 0.461233914 0.461366683 0.461351663 0.46123153 0.460961103 0.460535228 0.459962845 0.459229738 0.458375305 0.457320452 0.456081331 0.454712719 0.45316574 0.451414585 0.449460387 0.44734621 0.445037603 0.442500263 0.439837068 0.437079042 0.434206814 0.431210011 0.4280729 0.424862474 0.421526462 0.418141842 0.414773941 0.411458045 0.408230841 0.405093253 0.402018756 0.399032474 0.396144092 0.39336285 0.390703291 0.388167143 0.385800242 0.38359645 0.381472468 0.379366308 0.37722829 0.374956429 0.372421712 0.369526893 0.366269976 0.362639308 0.358536392 0.353969008 0.348992199 0.343619555 0.337826699 0.331696421 0.3252846 0.31865707 0.311854094 0.304927409 0.297999412 0.291189492 0.28455326 0.278151274 0.27209121 0.266436666 0.26121223 0.25638783 0.251987755 0.248067573 0.244605765 0.241525114 0.238834649 0.236535326 0.23459892 0.232952684 0.231571391 0.230453461 0.229556084 0.22882092 0.228230804 0.227764755 0.227393314 0.227072418 0.226793855 0.226547286 0.226311579 0.226083025 0.225878701 0.225727782 0.225658298 0.225671574 0.225791082 0.226018682 0.226354927 0.226793632 0.227306783 0.22789669 0.228539065 0.229235649 0.229992151 0.230796769 0.231625468 0.232481554 0.233364582 0.234267682 0.23517254 0.236092955 0.237042591 0.238017991 0.239001378 0.239969999 0.240948111 0.241928458 0.24288927 0.243828684 0.244723409 0.245587736 0.246405214 0.247144639 0.247843176 0.248499587 0.249104083 0.249679744 0.250246555 0.250792503 0.251318246 0.251819044 0.252325296 0.252836227 0.253333747 0.25382933 0.254332423 0.254841477 0.255351365 0.255854577 0.256335914 0.256786436 0.25723663 0.257676005 0.2580899 0.258499295 0.25890559 0.259309143 0.259722501 0.260159343 0.260614932 0.261101365 0.261641443 0.262244225 0.262914985 0.263653636 0.264469236 0.265374601 0.266337335 0.267382592 0.268492043 0.269627899 0.270788759 0.271961749 0.273138613 0.27432695 0.275510103 0.276673973 0.277824521 0.278930813 0.28000468 0.281055897 0.282054931 0.283018261 0.283916384 0.28475666 0.285542399 0.286246449 0.286874712 0.287435383 0.287912101 0.288274199 0.288523734 0.288646042 0.288641602 0.288491517 0.288206041 0.287820786 0.287326574 0.286717027 0.28602767 0.285310596 0.284594506 0.283930659 0.283341259 0.282832682 0.282389879 0.282017171 0.281706989 0.281443268 0.281161636 0.280854821 0.280507565 0.280093998 0.279598534 0.279012352 0.278333724 0.277607679 0.276862741 0.27609545 0.275318891 0.274553806 0.273793399 0.273018241 0.272224754 0.271424532 0.270564854 0.269635648 0.268646061 0.267648399 0.266715914 0.265866667 0.265190989 0.264665991 0.264289498 0.264112175 0.264066845 0.26410526 0.264211178 0.264324576 0.264351845 0.264285952 0.264142305 0.263942242 0.263679445 0.263353258 0.263001025 0.262631327 0.262207896 0.261775851 0.261354178 0.260921508 0.260523289 0.260186136 0.259910822 0.259693533 0.259511918 0.259366065 0.259218782 0.259111702 0.259033084 0.258992463 0.258981824 0.25900811 0.259066641 0.259145677 0.259278804 0.259487748 0.259704202 0.259912044 0.260192305 0.260485947 0.260766834 0.261049986 0.261306077 0.261550456 0.261814564 0.262053609 0.262270212 0.262520134 0.262791693 0.263104647 0.263415307 0.263744503 0.264158428 0.264643729 0.265144914 0.264400393 0.264891624 0.265401334 0.265935659 0.266446114 0.266899824 0.267292291 0.267572224 0.267717868 0.267706364 0.267544657 0.26720944 0.266663939 0.265849739 0.264802933 0.263499588 0.261881441 0.259892821 0.257563323 0.254808575 0.251626909 0.247966692 0.243816927 0.239184722 0.234036386 0.228267506 0.221895427 0.214999944 0.207679033 0.199937329 0.191881806 0.183720484 0.175646573 0.167815387 0.160276145 0.153220132 0.14680016 0.141112894 0.136103198 0.131796032 0.128197163 0.125201568 0.122775026 0.120825395 0.119309165 0.118201979 0.11750894 0.117158055 0.117116973 0.117304765 0.11772009 0.118365973 0.11920049 0.120198362 0.121326052 0.122578651 0.123935834 0.125362232 0.126842692 0.128355697 0.129895911 0.131445155 0.133019075 0.134608001 0.136211514 0.137837067 0.139448225 0.141068459 0.142706439 0.144349575 0.145986825 0.14762944 0.14928776 0.150935903 0.15258491 0.154222414 0.155850977 0.157483578 0.159053043 0.160569683 0.162035972 0.163466528 0.164811447 0.166078269 0.167241961 0.168332681 0.169360623 0.170278534 0.171057299 0.17173627 0.17230311 0.172725037 0.172985688 0.173117861 0.173128605 0.17297864 0.17267336 0.172236428 0.171697199 0.171042353 0.170247599 0.169332251 0.16836901 0.167335764 0.166233674 0.165086865 0.163899362 0.162678123 0.161453426 0.160211295 0.159007788 0.157831743 0.156701058 0.155574992 0.154515654 0.153534725 0.15259999 0.151682839 0.150781959 0.149942935 0.149180919 0.148459539 0.147771791 0.147160321 0.146615908 0.146131814 0.145679682 0.145272627 0.144895107 0.144555733 0.144210562 0.143885016 0.143612638 0.143390596 0.143175825 0.143025458 0.142935753 0.142864048 0.14286004 0.142919958 0.142993435 0.143117249 0.143262148 0.143415138 0.143602148 0.143823385 0.144074693 0.144335151 0.144605488 0.144891232 0.145192623 0.145507738 0.145874366 0.146268204 0.146679401 0.147139624 0.147633791 0.148161098 0.148727328 0.14928712 0.149823874 0.15040949 0.151031226 0.151652858 0.152264476 0.152856499 0.153470084 0.154083446 0.154677004 0.155265644 0.15584743 0.15641056 0.156975806 0.157542512 0.158073962 0.158633724 0.159197241 0.159749582 0.160319075 0.160887539 0.161423162 0.161928102 0.162425727 0.162934884 0.163426518 0.163894996 0.164322868 0.164708257 0.165077835 0.165397719 0.165619865 0.165754393 0.16579093 0.165700495 0.165488988 0.165160492 0.164667264 0.163998842 0.163170114 0.162210375 0.161092594 0.159781754 0.158304602 0.156691089 0.154994518 0.153239965 0.151432604 0.149624735 0.147849247 0.146078572 0.144361153 0.142738193 0.141198844 0.139708072 0.138258457 0.136922583 0.135683894 0.134539843 0.133513927 0.1326278 0.131900847 0.131363288 0.131040812 0.130907416 0.130896002 0.130959168 0.131079882 0.131144226 0.1311391 0.131068572 0.130877659 0.130557373 0.130077422 0.129443333 0.128701389 0.127942771 0.127169192 0.12634708 0.12555334 0.124830909 0.124177128 0.12360312 0.123106413 0.122670211 0.12234617 0.122035056 0.121679112 0.121339992 0.121011846 0.120696262 0.120407611 0.120133378 0.119939901 0.119762257 0.119560257 0.119439624 0.119353533 0.119283132 0.119204968 0.119151466 0.119194075 0.119301945 0.119372658 0.119460553 0.119542755 0.119611874 0.119634673 0.119570568 0.119488075 0.119479947 0.119475171 0.119344398 0.119251534 0.119214632 0.119201481 0.119127788 0.118986562 0.118941218 0.118936285 0.118927576 0.118853405 0.118789032 0.118685357 0.118494019 0.118270852 0.118021265 0.117622286 0.117198072 0.116784602 0.116211489 0.115449995 0.114753693 0.114112422 0.113313109 0.112501234 0.111659221 0.11087317 0.110072389 0.109004579 0.107984819 0.107057549 0.106000111 0.104788363 0.103655018 0.102644801 0.101610251 0.100384071 0.099185154 0.098198116 0.09717416 0.095997259 0.094892628 0.093918525 0.092986993 0.091877751 0.090946108 0.089986682 0.088931054 0.087958366 0.087159663 0.086489841 0.08571317 0.084780097 0.084193029 0.083710626 0.083090067 0.082452103 0.082064778 0.081857599 0.081618391 0.081348464 0.081101753 0.081126615 0.081045702 0.080922052
"10" 0.312613815 0.315472126 0.318353847 0.321153447 0.323912054 0.326664582 0.329457074 0.332274944 0.335229114 0.338161916 0.340998352 0.343790516 0.346661463 0.349589139 0.352429554 0.355066419 0.357424244 0.359563261 0.361890346 0.364648551 0.367715329 0.370535105 0.373521969 0.376497328 0.379342079 0.381999195 0.384827033 0.387764543 0.390676305 0.393558934 0.396286681 0.398964137 0.401596293 0.404146522 0.406591281 0.408927768 0.411073759 0.413560048 0.416044205 0.418594524 0.421113372 0.423324883 0.425311893 0.427416235 0.429617196 0.431822926 0.433903188 0.436018929 0.437967971 0.439872593 0.441703245 0.443511248 0.44521907 0.446916565 0.448546186 0.449947 0.451005325 0.451910242 0.452719659 0.453569755 0.454764992 0.456093028 0.45735912 0.458593294 0.459626019 0.460547566 0.461598873 0.462915614 0.464277089 0.465760276 0.467145994 0.468491375 0.469635487 0.470199719 0.470624909 0.470758006 0.471202716 0.471934736 0.472865701 0.473991707 0.475219429 0.476390854 0.477350116 0.478122607 0.478786051 0.47939153 0.479839414 0.480186582 0.480282843 0.480473399 0.480542898 0.480673045 0.48079434 0.480766147 0.480638146 0.480432838 0.480380148 0.480142072 0.47992982 0.479705945 0.479644626 0.479805991 0.479986787 0.480384231 0.480884686 0.481287688 0.481999844 0.482482836 0.482980803 0.483625695 0.484312832 0.483231559 0.484028831 0.484801486 0.485576272 0.486312479 0.487092495 0.487973347 0.48892808 0.489743188 0.490627974 0.491518751 0.492436647 0.493328631 0.494216338 0.495075926 0.49597387 0.496881276 0.497781083 0.498615801 0.499521598 0.500421599 0.5013441 0.502191529 0.503074631 0.503965393 0.504830509 0.505694315 0.506571442 0.507489473 0.508362651 0.509201944 0.509999901 0.510792464 0.511613309 0.512428701 0.513251692 0.514001399 0.514719486 0.51540646 0.516028702 0.516588807 0.517139375 0.517670572 0.518074185 0.518378109 0.518657327 0.518880576 0.519027621 0.519137621 0.51916194 0.519092798 0.518926769 0.518646151 0.518235058 0.517668813 0.516937613 0.516032785 0.515021563 0.513896704 0.512699276 0.511372089 0.509925753 0.508341849 0.506546587 0.504618883 0.502509713 0.500116408 0.497541741 0.49479793 0.491840914 0.488697067 0.485386834 0.481979191 0.478575215 0.475144044 0.471784532 0.468575254 0.465552673 0.462691873 0.459974989 0.457462445 0.45518288 0.453117982 0.451210082 0.449389994 0.447644681 0.44595398 0.444337651 0.442705348 0.441057593 0.439478427 0.437981918 0.436593503 0.435278192 0.434139177 0.433173835 0.432338536 0.431631267 0.431107432 0.430725649 0.43047291 0.430380434 0.430438057 0.430676803 0.431092456 0.431676403 0.432449192 0.433441415 0.43459551 0.435884133 0.437278584 0.438716874 0.440160975 0.441605836 0.443034634 0.444414929 0.445754543 0.447062954 0.44829233 0.449454024 0.450535238 0.451532319 0.452427432 0.45323199 0.453951359 0.454612032 0.455201611 0.455701336 0.456136733 0.456490532 0.456782967 0.45703949 0.457311571 0.457608983 0.457959339 0.458382562 0.458872616 0.459377259 0.459942847 0.46054174 0.461166322 0.461810514 0.462439209 0.462990046 0.463467926 0.4638592 0.464133129 0.464265272 0.46424444 0.464102119 0.463802621 0.463341758 0.46272698 0.461944506 0.461033061 0.459901795 0.458583951 0.457132593 0.455504775 0.453660265 0.451602146 0.449363559 0.446931735 0.444286883 0.441514894 0.438661695 0.435709819 0.432634115 0.4294191 0.426121101 0.422685742 0.41919297 0.415718094 0.412300512 0.408987612 0.405790925 0.402675658 0.399658889 0.396743774 0.393939003 0.391267315 0.388730213 0.38635695 0.384155139 0.382049844 0.379966259 0.377851829 0.375609472 0.373102963 0.370237172 0.367006406 0.36339438 0.359315187 0.354767129 0.349808648 0.344459444 0.338689297 0.332578704 0.326190561 0.319587573 0.312813401 0.305923656 0.299036711 0.292270869 0.285678208 0.279320836 0.273304313 0.267689705 0.2625058 0.257720172 0.253367394 0.249492221 0.246064365 0.243017316 0.240358159 0.238087952 0.236173503 0.234547414 0.233188957 0.232091539 0.231214911 0.230499715 0.229927629 0.229474127 0.229114912 0.228808098 0.228543885 0.228309512 0.228075214 0.227838971 0.22762318 0.227455631 0.227362074 0.227352776 0.227457792 0.227673814 0.228002913 0.228429832 0.228931732 0.229515649 0.230150923 0.230840176 0.231591165 0.232390612 0.233224034 0.234086357 0.234969802 0.235876858 0.236792684 0.237716541 0.238666102 0.239643842 0.240628146 0.24159836 0.242576599 0.243562214 0.244530305 0.245468758 0.246363863 0.247230306 0.248050675 0.248794779 0.249492556 0.250149541 0.250762165 0.25133951 0.251901194 0.252445027 0.252970889 0.253467754 0.253972203 0.25448665 0.254987031 0.255483598 0.255992591 0.256501511 0.25700748 0.257512093 0.257988885 0.258436382 0.258888006 0.259322867 0.259728193 0.260127127 0.26052615 0.260920987 0.261325136 0.261752993 0.26220572 0.262693733 0.263233781 0.263828665 0.264497206 0.265239686 0.266062573 0.266979307 0.267955184 0.269015297 0.270133317 0.271278083 0.272459984 0.273649156 0.274842948 0.276050523 0.277254835 0.278449267 0.279634222 0.280763209 0.281853318 0.282928079 0.283942521 0.284916535 0.285830259 0.286682382 0.287476242 0.288190797 0.288828492 0.289393291 0.289869055 0.290233538 0.290496245 0.290636688 0.290648758 0.290518671 0.290260181 0.289893672 0.289412946 0.288826823 0.288162574 0.287465513 0.286773771 0.286128312 0.285554945 0.28506425 0.284636021 0.284267038 0.283949316 0.283670157 0.283376396 0.283062294 0.282704368 0.282279372 0.281777591 0.281190842 0.280526042 0.279811099 0.279056191 0.278282553 0.277501717 0.276719987 0.275939614 0.275152922 0.274352103 0.273546964 0.272695765 0.271778584 0.270790756 0.269794241 0.268870711 0.268030748 0.267352521 0.266831741 0.266470164 0.266300067 0.266246572 0.266281039 0.266390279 0.266489819 0.266521469 0.266469717 0.266329363 0.266122133 0.265851617 0.265518993 0.265166268 0.264789119 0.264347851 0.263894185 0.263454258 0.263003424 0.262579307 0.262227312 0.261937082 0.261695027 0.261488944 0.26133433 0.26118201 0.2610562 0.260964498 0.260911092 0.26089032 0.26090081 0.260944456 0.261027247 0.261153176 0.261334881 0.261525601 0.261707351 0.261961684 0.262239069 0.262497872 0.262764335 0.263008237 0.263246909 0.263497859 0.263717905 0.263934791 0.264173597 0.264440432 0.264763117 0.265074819 0.265393123 0.265799165 0.266279697 0.266778305 0.266040549 0.266522244 0.26703991 0.26757139 0.268074751 0.268521041 0.268904433 0.269173846 0.269312605 0.269300938 0.269135311 0.268798858 0.268259436 0.267466277 0.266443029 0.265155628 0.263571396 0.261636972 0.259356692 0.256663799 0.253566459 0.249995507 0.245942645 0.241412915 0.236367136 0.230721511 0.224477552 0.217719883 0.210534371 0.20293276 0.195030279 0.187010728 0.179071933 0.171374232 0.163956054 0.157006025 0.150685631 0.145078242 0.140143842 0.135889664 0.132314816 0.129341118 0.126923952 0.12498685 0.123481754 0.122391041 0.121703234 0.121347852 0.1212852 0.121462006 0.121864114 0.122494578 0.123309676 0.124297787 0.12541927 0.126673616 0.128009409 0.129415631 0.130876496 0.132381327 0.133913837 0.135459803 0.137019522 0.138591059 0.140185624 0.141802482 0.143411472 0.145034447 0.146677762 0.14832364 0.149967983 0.151619136 0.153277703 0.154921323 0.15655861 0.158184446 0.159791104 0.161400631 0.162959181 0.164448448 0.165883318 0.167276718 0.168576479 0.16978319 0.170904659 0.171967939 0.172959037 0.173845164 0.17460297 0.175270706 0.175826356 0.176237814 0.17651128 0.176647432 0.176654778 0.176510684 0.176219434 0.17580156 0.175285384 0.174636088 0.173839703 0.172935478 0.171971627 0.170918055 0.169794522 0.168642581 0.167449534 0.166219264 0.164970979 0.163699605 0.162474483 0.161278613 0.160130128 0.158991501 0.157921612 0.156916685 0.155965596 0.155041493 0.154140398 0.153294004 0.152518131 0.151786678 0.151099645 0.150497243 0.149954185 0.149470471 0.149027243 0.14861986 0.148244232 0.147904627 0.147576667 0.14727325 0.14701698 0.146801911 0.146592438 0.146436989 0.146361306 0.146310598 0.146316171 0.146397538 0.146500848 0.14664264 0.146819137 0.1470071 0.147219144 0.14747306 0.147749029 0.148031548 0.148319438 0.148636207 0.148965634 0.149293683 0.149659164 0.150064453 0.150510326 0.150990635 0.151484326 0.152011469 0.152574308 0.153121307 0.153652415 0.154237799 0.154848151 0.155445397 0.156042427 0.156621784 0.157207608 0.157784246 0.158346407 0.158909127 0.159473352 0.160025783 0.160579622 0.161125831 0.161650509 0.162200555 0.16274026 0.163258858 0.163789406 0.16434329 0.164866991 0.165347934 0.165840447 0.166341543 0.166799396 0.167245425 0.167665884 0.168044679 0.168404892 0.168695085 0.168890119 0.169005491 0.169015683 0.16891063 0.168686636 0.168322742 0.167811163 0.16712784 0.1662907 0.165303938 0.164165489 0.162839398 0.161361478 0.159751661 0.158048443 0.156274036 0.154472709 0.152690813 0.150921389 0.149165131 0.147466399 0.145858951 0.144319817 0.142828807 0.141385287 0.140037917 0.138784714 0.137618758 0.136594601 0.135726653 0.135013841 0.134471893 0.13415271 0.134029672 0.134009957 0.134084776 0.13419985 0.134286225 0.134322643 0.134255677 0.134044759 0.133710302 0.133218259 0.132584065 0.131859668 0.131103598 0.130323887 0.129482441 0.128642663 0.127897453 0.127238244 0.126652546 0.126146365 0.125710849 0.125362802 0.12500976 0.124627732 0.124282442 0.123959709 0.123634078 0.123325743 0.12305424 0.122861933 0.122678004 0.122487001 0.122361314 0.122259311 0.122185986 0.122105554 0.122051086 0.122078408 0.122185104 0.122256991 0.122320764 0.122412566 0.122465804 0.122464649 0.122424468 0.122370355 0.122364599 0.122352459 0.122252204 0.12217889 0.122160707 0.122149207 0.12208033 0.121994145 0.121992253 0.121971585 0.121951148 0.121911891 0.121866621 0.121752329 0.121588066 0.121382423 0.121138152 0.120801978 0.120449882 0.120039336 0.119440384 0.11867401 0.117995147 0.117381226 0.116614599 0.115822747 0.115015075 0.11422509 0.113439206 0.112420566 0.111381929 0.110421874 0.109395176 0.108245395 0.107116356 0.106113404 0.105087049 0.103864945 0.10265277 0.101659782 0.100627244 0.099501841 0.098410122 0.09744088 0.096506994 0.095384918 0.094456226 0.093525607 0.092496753 0.091501251 0.090615049 0.08994833 0.089220505 0.088324744 0.087664392 0.087151635 0.086581632 0.086036406 0.085666198 0.085406501 0.085123632 0.08479676 0.084709216 0.084762599 0.084646299 0.084586333
"11" 0.296864033 0.299568504 0.302299708 0.304996341 0.307725757 0.310491294 0.313285023 0.316069901 0.318912715 0.32178846 0.324600935 0.327463716 0.330301255 0.333188653 0.336126983 0.338996202 0.34180066 0.344547004 0.347422421 0.350280613 0.353273273 0.3561517 0.359101355 0.362034768 0.364932597 0.367747486 0.370625943 0.37347883 0.376326621 0.379196376 0.381999314 0.384808362 0.387572944 0.39030236 0.393005997 0.395683974 0.39825052 0.400934428 0.403488547 0.406083316 0.408626884 0.411118239 0.413473457 0.415886432 0.418269485 0.420555472 0.422837704 0.425123036 0.427300572 0.429466367 0.431498379 0.433557481 0.435481191 0.437443346 0.439304322 0.441060901 0.442682028 0.444262475 0.445784479 0.447285175 0.448743671 0.450268865 0.451708615 0.45314768 0.454520166 0.455821007 0.457184702 0.458659738 0.460042864 0.461596072 0.463006914 0.464422226 0.465932488 0.467176497 0.468501806 0.469620943 0.470894009 0.472221345 0.473462641 0.47467041 0.475850791 0.476978481 0.477980882 0.478875458 0.479654461 0.480215847 0.48069793 0.480981648 0.481079251 0.481097758 0.481176108 0.480952054 0.480823427 0.48057729 0.480347127 0.4801296 0.479995668 0.479750365 0.479591072 0.479441702 0.479315609 0.479491919 0.479593098 0.47995916 0.480530083 0.4809452 0.48163861 0.482359469 0.482979357 0.48372519 0.484578311 0.483279675 0.484210193 0.485095888 0.486008316 0.486928463 0.487881392 0.488863856 0.489975721 0.490980446 0.492004812 0.493020833 0.494061649 0.495097846 0.496148169 0.497133166 0.498160005 0.499193609 0.500201225 0.501156211 0.502202332 0.503209949 0.504197538 0.505118251 0.506103814 0.50709492 0.508026779 0.508958936 0.509889066 0.51087451 0.511823356 0.512712538 0.513603985 0.514461875 0.515365958 0.516260028 0.51714319 0.517946243 0.518766403 0.519548953 0.520296335 0.520989418 0.521692932 0.522388458 0.522951603 0.523475647 0.524020374 0.524500787 0.524909377 0.525313318 0.525647402 0.525906146 0.526115537 0.526241183 0.526301503 0.526242852 0.526059151 0.525773048 0.525374293 0.524827659 0.524117589 0.523194075 0.522112012 0.52082473 0.519256592 0.517453671 0.515417218 0.513060331 0.510493636 0.507719755 0.504737079 0.501559615 0.498210818 0.494707614 0.491180718 0.487609595 0.484066039 0.480653107 0.477439582 0.474446595 0.471630096 0.469072878 0.466756046 0.464668334 0.462778389 0.460992664 0.45930326 0.457669586 0.456116468 0.45456022 0.452993006 0.451474577 0.45003143 0.448674083 0.447353393 0.446190685 0.445204228 0.444370657 0.443707407 0.443229884 0.442896992 0.442709535 0.442703694 0.442849278 0.443183303 0.44370687 0.444381922 0.445267141 0.446380883 0.447665423 0.449109256 0.450644642 0.452219427 0.453822076 0.455412924 0.456963778 0.458482414 0.459967256 0.461411506 0.462763071 0.464055955 0.465269297 0.466369241 0.467380971 0.468302101 0.469130099 0.46991989 0.470660597 0.471320093 0.471917242 0.472465873 0.472969025 0.473408163 0.473856747 0.474291414 0.47475037 0.475252897 0.475817412 0.476384044 0.477004528 0.477655828 0.478320867 0.479004622 0.479659051 0.48022753 0.48072207 0.481129706 0.48145014 0.481643617 0.481699288 0.481642157 0.481432676 0.481062949 0.480564743 0.479926586 0.479147673 0.478150368 0.476956159 0.475606591 0.474065065 0.472313851 0.470361829 0.46824345 0.465937197 0.463397682 0.46069783 0.457884073 0.454933524 0.451846689 0.448645592 0.445396006 0.442029089 0.438647985 0.435315728 0.432020068 0.428799272 0.425677121 0.42260471 0.419604212 0.416695237 0.413875163 0.411176711 0.408611476 0.406194568 0.403930128 0.401746094 0.399575233 0.397343129 0.394956052 0.392301381 0.389263421 0.385842979 0.382035851 0.37773779 0.372974098 0.367809922 0.362256646 0.356302738 0.350039572 0.343537837 0.336872756 0.330092311 0.323243797 0.316444367 0.309804976 0.303385794 0.297242522 0.291465491 0.28612709 0.281227291 0.276730359 0.272684813 0.269118011 0.265990317 0.263254166 0.260881007 0.258881688 0.257227421 0.255843312 0.254707456 0.253807068 0.253095925 0.25251776 0.252071172 0.251731217 0.251458406 0.251210541 0.250988454 0.250796318 0.250624955 0.250459075 0.250326365 0.250250131 0.250250697 0.250331312 0.250527769 0.250827789 0.251231849 0.251738906 0.252319455 0.252969831 0.253668576 0.254425645 0.255243987 0.256099045 0.256984472 0.257892698 0.258823961 0.259773493 0.260754585 0.261753649 0.26276803 0.263812214 0.264853746 0.265861064 0.266870975 0.267880678 0.268867075 0.269831121 0.270750493 0.271631002 0.272456199 0.273214728 0.273935378 0.274614692 0.275246203 0.27584818 0.276438266 0.276995122 0.277534813 0.278064311 0.278595418 0.279128194 0.279634744 0.280147493 0.280688256 0.281229228 0.28178665 0.282323211 0.282821655 0.283317 0.283833802 0.284332871 0.284802556 0.285274655 0.285729438 0.286184162 0.286639571 0.287109613 0.287584454 0.288088411 0.288668007 0.289307237 0.290006697 0.290784925 0.291635603 0.292583168 0.293610513 0.294715881 0.295870215 0.297064364 0.298289806 0.299523473 0.300766319 0.302015185 0.303269506 0.304501325 0.305714369 0.306871474 0.307997465 0.309107929 0.310145557 0.311138272 0.312067807 0.312939674 0.313742042 0.314478725 0.315155983 0.315760702 0.3162691 0.31666252 0.316959471 0.31712535 0.317167252 0.317075133 0.31686613 0.316551507 0.316104949 0.315549314 0.314904183 0.314222157 0.313528776 0.312878281 0.312314034 0.311839759 0.311434776 0.311065763 0.310749114 0.310488015 0.310205758 0.309902221 0.30954501 0.309092641 0.308564484 0.307942301 0.307233304 0.306468248 0.30565086 0.30481714 0.303989768 0.303157806 0.302344441 0.301543832 0.30072993 0.299920291 0.299062967 0.298118323 0.297124743 0.296140313 0.295224518 0.294411749 0.293760508 0.293291599 0.292997837 0.292899579 0.292940795 0.293056637 0.2932356 0.293402761 0.293483078 0.293466121 0.293314815 0.293070316 0.292752624 0.292347789 0.291907966 0.291463882 0.290977091 0.290427625 0.289897919 0.289400667 0.288949847 0.288553894 0.288228989 0.28797558 0.287777603 0.287642568 0.287501931 0.287379473 0.287315309 0.28729251 0.287303001 0.287329793 0.287397355 0.287551045 0.287732869 0.287961543 0.288223207 0.288481474 0.288810343 0.289158523 0.289488167 0.289802641 0.290074795 0.290352166 0.290649265 0.29092142 0.291175336 0.291438758 0.291742802 0.292092621 0.292411655 0.292747825 0.293161035 0.293638706 0.294173449 0.293413818 0.293893993 0.294395268 0.294918835 0.295423418 0.295834064 0.296165168 0.296370327 0.296482056 0.296415389 0.296166122 0.295739651 0.295101255 0.294187307 0.293036878 0.291585326 0.289794534 0.287669122 0.285190284 0.282294333 0.27895993 0.275133014 0.270786166 0.265947819 0.260592669 0.254606724 0.247986853 0.240866065 0.233345151 0.225422084 0.217223018 0.208945885 0.200785577 0.192891866 0.18530789 0.178257063 0.171880439 0.166275427 0.161372766 0.15715088 0.153620437 0.150715515 0.148374915 0.146520272 0.145088613 0.144076377 0.143464923 0.143187851 0.143199146 0.1434834 0.143981919 0.144717634 0.145648271 0.146691054 0.147877514 0.149197772 0.150640368 0.152143404 0.153672919 0.155252397 0.156908095 0.158563435 0.160211101 0.161859602 0.163517222 0.165203437 0.166892305 0.168562889 0.170258269 0.171966776 0.173691869 0.17541036 0.177122205 0.178834081 0.180561379 0.182257459 0.183935583 0.185597017 0.187222615 0.188823745 0.190380871 0.191883624 0.193310037 0.194654778 0.195912495 0.197096273 0.198198736 0.199208215 0.200094372 0.200863019 0.201529816 0.202047855 0.202406064 0.20262 0.202684805 0.202612698 0.20239076 0.202028155 0.20152688 0.200898305 0.200164795 0.199347764 0.198437676 0.197465464 0.196451724 0.195370793 0.194224834 0.193063438 0.191881597 0.190678909 0.189502031 0.188353941 0.187243059 0.186153427 0.185106575 0.184103325 0.183140263 0.182189763 0.181275591 0.180427283 0.179624259 0.178879231 0.178166971 0.177539051 0.176978827 0.176465839 0.176038429 0.17565687 0.175305977 0.174974531 0.174658388 0.174354643 0.174112365 0.173930973 0.173770905 0.17364499 0.173575819 0.17355369 0.17362389 0.173770234 0.17393218 0.174173504 0.174455971 0.174717724 0.175008267 0.175331116 0.175651684 0.17597951 0.176316679 0.176690981 0.177071065 0.177445203 0.17785944 0.178300917 0.178796038 0.179343656 0.179894567 0.180457413 0.181031331 0.181593478 0.182163969 0.182761446 0.183372825 0.184013531 0.184642449 0.185233727 0.185811162 0.186374292 0.18693389 0.187494427 0.188061848 0.188632771 0.189187974 0.189704701 0.190214083 0.190736324 0.191270575 0.191789687 0.192279741 0.192772582 0.193266615 0.19372493 0.194183901 0.194638655 0.195076883 0.195466042 0.195842415 0.196213886 0.196512163 0.1967545 0.196915224 0.197015435 0.196995974 0.196819589 0.196541741 0.196116656 0.195519045 0.194738224 0.193800345 0.192712322 0.191473007 0.190025941 0.188407376 0.18665494 0.18481411 0.182910949 0.180960074 0.178990901 0.176997334 0.174996674 0.173109531 0.171351165 0.169651389 0.168037653 0.166431099 0.164905101 0.163530916 0.162261024 0.161140367 0.160199225 0.159415245 0.158820495 0.158479631 0.158320636 0.158276796 0.158340111 0.158448726 0.158550426 0.158579469 0.158475474 0.158195347 0.157746181 0.157183796 0.156463146 0.155642733 0.154787302 0.15388906 0.152945295 0.152008653 0.151206851 0.150571033 0.150053695 0.149609208 0.149242923 0.148959666 0.148643881 0.14825353 0.147866964 0.147532806 0.147212043 0.146874338 0.146533176 0.14628911 0.146062672 0.145837352 0.145655021 0.14548707 0.145370439 0.145297483 0.145240232 0.145258471 0.145395443 0.145531029 0.145638838 0.145768017 0.145833865 0.145867109 0.145885497 0.145866275 0.145804346 0.145685136 0.145591795 0.145542771 0.145461351 0.145360649 0.145236835 0.145177588 0.145203888 0.145127192 0.144971251 0.14497532 0.144943193 0.144752219 0.144570708 0.144409254 0.144184887 0.143830553 0.143381387 0.142923564 0.142317936 0.141549096 0.14087902 0.140176505 0.139414266 0.138585344 0.137685597 0.136817664 0.13584739 0.134803772 0.133775219 0.132714376 0.1316275 0.130407333 0.129228488 0.128220677 0.127222747 0.126007766 0.124763526 0.123729236 0.122598894 0.121338472 0.120306671 0.119199947 0.118059754 0.116924912 0.115908481 0.114843674 0.113766797 0.112703845 0.111683324 0.110894024 0.110081501 0.109212503 0.10842935 0.107803531 0.107128635 0.106269807 0.105872661 0.105764151 0.105406433 0.105133526 0.104957394 0.104893528 0.104863383 0.10490346
"12" 0.285588503 0.288022906 0.290554047 0.293058753 0.295588136 0.298163623 0.300727367 0.303321362 0.305951267 0.308634758 0.311256349 0.313916504 0.31652534 0.319259346 0.322005928 0.324671954 0.327309072 0.329925656 0.332614988 0.335336417 0.3381446 0.340876013 0.343668997 0.346414328 0.34919259 0.351857185 0.354548663 0.357328027 0.360031754 0.3627581 0.365444332 0.368146896 0.370803177 0.373434305 0.376055032 0.378656656 0.38117981 0.383741975 0.386235207 0.388758391 0.391247272 0.393683076 0.396012157 0.398374498 0.400733382 0.402994752 0.405200601 0.407498181 0.40969038 0.411815077 0.413873076 0.415964663 0.417910874 0.41991502 0.421779096 0.423610389 0.425319791 0.426953465 0.42859754 0.430154711 0.431734264 0.433369994 0.434874505 0.436445385 0.437868774 0.439383656 0.440809846 0.442332178 0.443844497 0.44545725 0.446941704 0.448424727 0.450037718 0.451386273 0.45282048 0.454043686 0.45545274 0.456809431 0.45810616 0.459387511 0.460657358 0.461875975 0.462992311 0.463983059 0.464872777 0.465618938 0.466155082 0.466674745 0.466845512 0.467169106 0.46727407 0.467377394 0.467419088 0.467378438 0.467437148 0.467322975 0.467389464 0.467361867 0.467388988 0.467294216 0.467471987 0.467796803 0.467975318 0.468472719 0.469074577 0.469691098 0.470408797 0.47116977 0.471876323 0.472718596 0.473594457 0.47225377 0.473187268 0.474103659 0.475041091 0.475942075 0.476847231 0.477820963 0.478893906 0.479821146 0.480836213 0.481838048 0.482879192 0.483914942 0.484913468 0.485939264 0.486961246 0.487988085 0.488985479 0.489932477 0.490923673 0.491897851 0.492853135 0.493777007 0.494725019 0.495617002 0.496501207 0.497393698 0.498278201 0.499196231 0.500055909 0.500901401 0.501724243 0.502520084 0.503321409 0.504136324 0.504999757 0.505797625 0.506554961 0.5073241 0.508067369 0.508765578 0.509448767 0.510146856 0.510764599 0.511301279 0.511859238 0.51239574 0.512876272 0.513320804 0.513731897 0.514077961 0.514364719 0.514564037 0.51468575 0.514722109 0.51466918 0.514490843 0.514200866 0.513767481 0.513209939 0.512432754 0.511458278 0.510299444 0.508874893 0.507257402 0.50540024 0.503253639 0.50089854 0.498355389 0.495594651 0.492674291 0.489613861 0.486442029 0.483239591 0.479985178 0.476782113 0.47369343 0.470802635 0.468081534 0.465505779 0.46317178 0.46106419 0.459162116 0.457438111 0.455821514 0.454292566 0.452836633 0.451446205 0.450040042 0.448623866 0.447249442 0.445939749 0.444709808 0.443544298 0.442507833 0.441616178 0.440873325 0.440286219 0.439880997 0.439609736 0.439458579 0.439465374 0.439610809 0.439916223 0.440375596 0.440988868 0.441798121 0.442822665 0.443996489 0.445297569 0.44669798 0.448147595 0.449622244 0.451086938 0.452506274 0.453891695 0.45523718 0.456549406 0.457791984 0.458963305 0.460040778 0.461057514 0.462002546 0.462873787 0.463654697 0.464383006 0.465053737 0.465659231 0.466219515 0.466730326 0.467194676 0.467619509 0.468046129 0.468473256 0.468904227 0.469384134 0.469906032 0.470433086 0.471001714 0.471595407 0.472198159 0.472802788 0.47338298 0.473878711 0.474284202 0.474596411 0.474809825 0.474909842 0.474908143 0.474814266 0.474591494 0.474252313 0.473820984 0.473273993 0.472631395 0.471793801 0.470785558 0.469666183 0.46840772 0.466975391 0.465337455 0.463522673 0.461545587 0.459364086 0.457013428 0.454543769 0.451932162 0.449186713 0.446319878 0.4433963 0.44037357 0.437310368 0.434273392 0.431264192 0.428320676 0.425448716 0.422607064 0.419821888 0.417121798 0.414520293 0.412022442 0.409642428 0.407414436 0.405314416 0.403287858 0.401274651 0.399215549 0.397024751 0.394566387 0.391761571 0.38861078 0.385080516 0.381115854 0.376730263 0.371957958 0.366823316 0.36131531 0.355513722 0.349480271 0.343279004 0.336948395 0.330540091 0.324166894 0.317925662 0.311876863 0.306076765 0.300605804 0.295532644 0.290871084 0.286598206 0.282746375 0.279333711 0.276341975 0.273711801 0.271434903 0.269512475 0.267915815 0.266580135 0.265495539 0.264636338 0.263950288 0.263402969 0.2629731 0.262640923 0.262380004 0.262147069 0.261945903 0.261778057 0.261607677 0.261448652 0.261322111 0.26124993 0.261261791 0.2613585 0.261552334 0.261840701 0.262233764 0.262708575 0.263251781 0.26387316 0.264537334 0.265261292 0.266036689 0.26683411 0.267670423 0.268546432 0.269441515 0.270356447 0.271287352 0.272225738 0.273190469 0.274194658 0.275194347 0.276165158 0.277142972 0.278115898 0.279074162 0.280012399 0.280904055 0.281757981 0.282552332 0.283275723 0.283972442 0.284634501 0.28523919 0.285811603 0.28636843 0.286900103 0.287432581 0.287936717 0.288443029 0.288967669 0.289465547 0.289960384 0.290477574 0.290993661 0.291502476 0.292008489 0.292489976 0.292952299 0.293438643 0.293908089 0.294348538 0.294792682 0.295230627 0.295665383 0.296103895 0.296567827 0.297052234 0.297558248 0.298110008 0.298718184 0.299400181 0.300142199 0.300953954 0.301870853 0.302852124 0.303903669 0.30501312 0.30615738 0.307341874 0.308516145 0.309685737 0.310862035 0.312029988 0.313200086 0.314355671 0.31545186 0.316498935 0.317553043 0.318542331 0.319470316 0.320364386 0.321186453 0.321945935 0.322639823 0.323260337 0.323826045 0.324302614 0.324673891 0.324964225 0.325140476 0.325195789 0.325114548 0.324918747 0.324608773 0.324180603 0.323650539 0.323041618 0.322381526 0.321706682 0.321074992 0.320506066 0.320025563 0.319608927 0.319230199 0.318899065 0.318623692 0.31834206 0.31802702 0.317662567 0.317206442 0.316663831 0.316039205 0.315322578 0.31454429 0.313730478 0.312904775 0.312079817 0.311276674 0.310500681 0.309716135 0.308928519 0.308160692 0.307338476 0.306424469 0.305460244 0.304513186 0.303635806 0.302852809 0.302236736 0.301782727 0.301488131 0.301380008 0.301419556 0.301549464 0.301757663 0.301968575 0.302089006 0.302099526 0.301977605 0.301755488 0.301457375 0.301080465 0.300659031 0.300227255 0.299733371 0.299207777 0.298726588 0.298257411 0.297823936 0.297474712 0.297203541 0.296988696 0.29682821 0.296700746 0.296576381 0.296481669 0.296406925 0.296374559 0.296381414 0.296414554 0.296462417 0.296598941 0.296774685 0.296973526 0.297213823 0.297465473 0.297768384 0.298083782 0.298404872 0.298727125 0.299018025 0.299286336 0.299566686 0.299834967 0.300071359 0.300310671 0.300603479 0.300955504 0.301261872 0.30158481 0.301978528 0.30244568 0.302952111 0.302230895 0.302685976 0.303156883 0.303664774 0.304174513 0.304595828 0.30494222 0.305146307 0.305224001 0.30518204 0.304999113 0.304651141 0.304057121 0.303207606 0.30212605 0.300749898 0.299068779 0.297059774 0.294695258 0.291930497 0.288790196 0.28518188 0.281056136 0.276430607 0.271281481 0.265508175 0.259105772 0.252203524 0.244854733 0.237087801 0.229003698 0.220799953 0.212671846 0.204798266 0.197213694 0.19011417 0.183674648 0.17795226 0.172911748 0.168579996 0.164963767 0.161968321 0.159559429 0.157653451 0.156180814 0.155148387 0.154536664 0.154277548 0.154302835 0.154595762 0.155153528 0.155943304 0.156904787 0.158005774 0.159258917 0.160653248 0.162151203 0.163696781 0.165295303 0.166963458 0.168655083 0.170348898 0.17205143 0.17374447 0.175484598 0.177237883 0.178978026 0.180706218 0.18247132 0.184213027 0.185971245 0.187712923 0.189468503 0.191230953 0.192976668 0.194712266 0.196414709 0.198116109 0.199787259 0.201393649 0.202953085 0.204466328 0.205920696 0.207286283 0.208530813 0.209695965 0.210803494 0.211800992 0.212676123 0.213451967 0.214106217 0.214619949 0.214978367 0.21517694 0.215232864 0.215147763 0.214900896 0.214525312 0.214035451 0.213417202 0.212659851 0.211816952 0.210898712 0.209908858 0.208847091 0.207713723 0.20655337 0.205363184 0.204146877 0.20293054 0.201760024 0.200610533 0.199489474 0.198369458 0.197305381 0.196297035 0.195304364 0.194327042 0.193400607 0.19253175 0.19171837 0.190976247 0.190273076 0.189654887 0.189120486 0.188639507 0.188217983 0.187830389 0.187482774 0.187165737 0.186867923 0.186581552 0.186350346 0.186158001 0.185987428 0.185880437 0.185863391 0.185887277 0.185967982 0.186136425 0.186331555 0.186558068 0.186850637 0.187171921 0.187511697 0.187864557 0.188254565 0.188646227 0.189047039 0.189430863 0.189833075 0.190236568 0.190667793 0.191148251 0.191663235 0.192199081 0.19275111 0.193335652 0.193941236 0.194533557 0.195072308 0.195661664 0.196298152 0.196907356 0.197499752 0.198095188 0.198692575 0.199250624 0.19977279 0.200295135 0.20081979 0.201348603 0.201887101 0.202424079 0.202959105 0.203505114 0.203993082 0.204486877 0.204992339 0.205466971 0.205922648 0.206371024 0.206835791 0.207315117 0.20774883 0.208143756 0.208536327 0.208880633 0.209195957 0.209450096 0.209610239 0.209714293 0.209694833 0.20953463 0.209266275 0.208854139 0.208254367 0.207453325 0.206493139 0.205374867 0.204090625 0.202623934 0.201018557 0.199255109 0.197372809 0.195405543 0.193403423 0.191398412 0.189367115 0.187319115 0.185356259 0.183492526 0.181671381 0.179983348 0.178358167 0.176779658 0.175299391 0.173942372 0.172729731 0.171712264 0.170886561 0.170279488 0.169923693 0.169757873 0.169717148 0.169812709 0.169964403 0.170033261 0.170035899 0.169905335 0.16956532 0.169094726 0.168485209 0.167720079 0.166919366 0.166067719 0.165107235 0.164089575 0.16310735 0.162274435 0.161622718 0.161056697 0.160602853 0.160255492 0.159993038 0.159733132 0.159401491 0.159051955 0.158724129 0.158361733 0.157995284 0.157678813 0.157422379 0.157154411 0.156913787 0.156724602 0.156559542 0.156439349 0.156378984 0.15635398 0.156427115 0.156572893 0.156697541 0.156863675 0.157023385 0.157078624 0.157101348 0.15705438 0.156990245 0.156995252 0.156963825 0.156813115 0.156666666 0.156561971 0.156497985 0.156392202 0.156237826 0.156180859 0.15612638 0.156142935 0.15611133 0.156037644 0.155892804 0.155726254 0.155541077 0.15536955 0.155018315 0.1544718 0.153914526 0.15332675 0.152563214 0.151856542 0.151232868 0.150412589 0.149426773 0.148488864 0.147596538 0.146520749 0.145301044 0.144169822 0.143132269 0.14199838 0.140728816 0.139409408 0.138328314 0.137245938 0.13584435 0.134523019 0.133426845 0.132326484 0.131063625 0.12981759 0.128669322 0.12740609 0.126047462 0.1248689 0.123792998 0.122686766 0.121503815 0.120316558 0.11937163 0.118643776 0.117708482 0.116788387 0.116187848 0.115555078 0.11480397 0.114252999 0.114082262 0.113822542 0.113281831 0.113214411 0.113322243 0.113184161 0.113092773
"13" 0.263802111 0.266315877 0.268898636 0.271465033 0.274071872 0.276697427 0.279359996 0.282003224 0.284734786 0.287486315 0.290214062 0.292916954 0.295646608 0.298492551 0.301282436 0.30407536 0.306863993 0.309664458 0.312535763 0.315342486 0.318245173 0.321089089 0.323962837 0.326885134 0.32974714 0.332569182 0.335405082 0.338309586 0.341137469 0.344005913 0.346847594 0.349727094 0.352531284 0.355358362 0.358177692 0.360997409 0.36368838 0.366483122 0.369164795 0.371872008 0.374527931 0.377159148 0.379705399 0.382312357 0.384855121 0.387370288 0.389774799 0.392267585 0.394667476 0.397051811 0.399331778 0.40163514 0.403835267 0.406038225 0.408168823 0.410234362 0.41221571 0.414139867 0.416097254 0.417955577 0.419805437 0.421603739 0.423363864 0.425187767 0.426925302 0.428635955 0.430324793 0.432169408 0.433877617 0.435692102 0.43737793 0.439132065 0.440977305 0.442608625 0.444401205 0.445982903 0.447653055 0.449343771 0.45090428 0.452447534 0.453876466 0.455272049 0.456591755 0.45780316 0.458911538 0.459866375 0.46058923 0.461160392 0.461614668 0.462037623 0.462310135 0.462506503 0.462664217 0.462762564 0.46283561 0.462938935 0.463025212 0.463179588 0.463301063 0.463444173 0.463611215 0.463968784 0.464354128 0.464967132 0.465687752 0.466346711 0.467201829 0.46805045 0.468853384 0.469922364 0.470744818 0.469285488 0.470381021 0.471434385 0.472485512 0.473483235 0.474525303 0.475628257 0.476784617 0.477807462 0.478892624 0.479986995 0.48111245 0.482186884 0.483259529 0.484322369 0.485403121 0.48648724 0.487540245 0.488529176 0.489619881 0.490736961 0.491805673 0.492786765 0.493887991 0.494965792 0.4959701 0.497014761 0.498096704 0.499202728 0.500290692 0.50136292 0.502408028 0.503397346 0.504397452 0.505400062 0.506422639 0.507345974 0.508270681 0.509149373 0.509926319 0.510687172 0.51143837 0.512192547 0.512834489 0.513370752 0.513908029 0.514411032 0.51486361 0.515271187 0.515617907 0.515881777 0.516080797 0.516200483 0.516244888 0.516256928 0.516168892 0.515963018 0.515665829 0.515214026 0.514613748 0.513809979 0.512827933 0.511642754 0.510173261 0.50851661 0.506642342 0.504444361 0.502020419 0.499421924 0.496646374 0.493689597 0.490563989 0.487321764 0.484058142 0.48074469 0.477466553 0.474311084 0.471324742 0.468533933 0.46590209 0.463501543 0.461327821 0.4593786 0.457609773 0.455953926 0.454400301 0.45291391 0.451499462 0.450079083 0.448633134 0.447232276 0.445891112 0.444641918 0.443449974 0.44241038 0.441534072 0.440775514 0.440175265 0.439770073 0.439497441 0.439350933 0.439377308 0.439537168 0.43987143 0.440372288 0.441034317 0.441898823 0.442970544 0.444196939 0.44555977 0.447009653 0.448515952 0.450043201 0.451560289 0.453037024 0.454474896 0.455855995 0.457212865 0.458514631 0.459748477 0.460877359 0.461917698 0.462881267 0.463762045 0.464552402 0.465290666 0.465996176 0.466617852 0.467188567 0.467705071 0.468170762 0.468589544 0.468993902 0.469393671 0.469812781 0.470258594 0.470729798 0.471214026 0.471772969 0.472367048 0.472982854 0.473616362 0.474247664 0.474821746 0.475328535 0.475775689 0.476149648 0.476419181 0.476554722 0.476574987 0.476430804 0.476110727 0.475652069 0.475041509 0.474284679 0.473285764 0.472069561 0.470694482 0.469146699 0.467375457 0.46540916 0.463294595 0.46102488 0.458560914 0.455961764 0.453260511 0.450471193 0.447580367 0.444596112 0.441580027 0.438493043 0.43540293 0.432358325 0.429382354 0.426473498 0.423630327 0.420814782 0.41806826 0.41541189 0.412835985 0.410358906 0.407996148 0.40577668 0.403691083 0.401676059 0.399656624 0.397572368 0.395349711 0.39284724 0.389975667 0.386728823 0.383096963 0.379014283 0.374491841 0.369572639 0.364281386 0.358607233 0.352628231 0.346403927 0.340013474 0.333500087 0.326896489 0.320328474 0.31390667 0.307684571 0.301728666 0.296123266 0.29092297 0.286155343 0.281774163 0.277815372 0.27431336 0.271241605 0.268533856 0.26619643 0.264229804 0.262595862 0.261234343 0.260113925 0.259228498 0.258534282 0.257972956 0.257529855 0.257179469 0.256896913 0.25664705 0.256421626 0.256226778 0.256033778 0.255839974 0.255692303 0.255611897 0.255610287 0.255695254 0.255881697 0.256161749 0.25654766 0.257023871 0.257574707 0.258202106 0.258879185 0.259610534 0.260389894 0.261197954 0.262037128 0.26291132 0.263809204 0.264736384 0.265674561 0.266622752 0.267602056 0.268609196 0.269609243 0.270586401 0.271582067 0.272586763 0.273561299 0.274510831 0.275416195 0.276282638 0.277104288 0.277840644 0.278529495 0.279197842 0.279816091 0.280396014 0.280972064 0.281523198 0.28204903 0.282552093 0.283061743 0.283584833 0.284102678 0.284626037 0.28516683 0.285715014 0.286265224 0.286798298 0.287303418 0.287794918 0.288295716 0.288774669 0.289230496 0.289698303 0.290151119 0.290599495 0.291045129 0.291501254 0.291969478 0.292467326 0.293012917 0.293614984 0.294291317 0.295038909 0.295871943 0.296809345 0.297801256 0.298872441 0.299987555 0.301125735 0.302299261 0.303489417 0.304674178 0.305863529 0.307058126 0.308235377 0.309401095 0.310506433 0.311573386 0.312649339 0.313655406 0.314603299 0.315489799 0.316319883 0.317094475 0.317807913 0.318454355 0.319032192 0.319518 0.319883138 0.320163608 0.320338875 0.320380718 0.320294857 0.32010147 0.319801629 0.319381177 0.31885621 0.318270952 0.317660511 0.317041725 0.316447973 0.315916568 0.315460265 0.315044194 0.314667404 0.314338982 0.314053535 0.313754559 0.313420773 0.313036323 0.312551141 0.311964005 0.311300278 0.310548276 0.309768766 0.30895558 0.308118463 0.307289392 0.30644989 0.30563271 0.304817796 0.303978771 0.303159535 0.302317113 0.301404744 0.300421506 0.299434006 0.298526168 0.297708958 0.297050923 0.296566427 0.296267092 0.296130508 0.296118528 0.296213567 0.29638657 0.296563715 0.296652585 0.296642005 0.29650718 0.296290576 0.296002746 0.295621812 0.295216978 0.294792265 0.294318467 0.293815613 0.29332599 0.29283154 0.292392373 0.292042643 0.291749984 0.291520119 0.291346371 0.291212112 0.291101843 0.291017234 0.290943056 0.290892929 0.290894121 0.290913194 0.290956557 0.29110378 0.2912938 0.291506022 0.291751355 0.292005062 0.292321175 0.292655975 0.292972833 0.293285221 0.293562889 0.29383409 0.29411906 0.294373959 0.294638664 0.294922113 0.295221657 0.295571417 0.295886248 0.296231657 0.296675891 0.297157109 0.297665417 0.296934873 0.297393769 0.297894001 0.298390985 0.298882902 0.299302459 0.299649626 0.29988575 0.299990505 0.299943686 0.299713284 0.299303114 0.298688322 0.297796994 0.296652049 0.29522261 0.293506026 0.291451842 0.289034486 0.286198586 0.282977432 0.279261321 0.275025487 0.270295382 0.265028298 0.259146959 0.252628148 0.24556385 0.238067508 0.230155021 0.221947789 0.213629484 0.205373928 0.1973719 0.189644411 0.182418317 0.175874889 0.170072943 0.164991885 0.160630524 0.15699707 0.153989613 0.151584864 0.149661571 0.148191288 0.147161633 0.146562681 0.146314323 0.146357596 0.146667972 0.1472224 0.148012102 0.148983583 0.15008536 0.151324928 0.152716309 0.154195473 0.155744284 0.157343805 0.158997431 0.16068995 0.162393689 0.164106175 0.165810704 0.167524293 0.169247955 0.17097187 0.172696337 0.174440444 0.176171362 0.177908987 0.179656833 0.1814114 0.183159024 0.184905276 0.186626583 0.188330054 0.19004558 0.191709563 0.193305597 0.194865391 0.196394578 0.197832927 0.199185431 0.200454667 0.201637477 0.202743277 0.203728333 0.204592079 0.205348775 0.205977648 0.206466198 0.206802279 0.206993327 0.207033753 0.206922382 0.206654146 0.20626992 0.205778584 0.205145761 0.204390913 0.203538984 0.202601075 0.201588273 0.200508386 0.199380845 0.198195294 0.19699356 0.195769727 0.194540754 0.193364069 0.19220525 0.191070974 0.189942598 0.188888296 0.187899292 0.186923578 0.18595323 0.185025722 0.184165046 0.183355078 0.182591453 0.181875855 0.181249574 0.180684805 0.180192649 0.179776713 0.179387167 0.17902416 0.17868121 0.178352088 0.178041294 0.17778556 0.177561298 0.177357495 0.177224755 0.177181602 0.177195534 0.177280843 0.177416235 0.177594706 0.17783621 0.178095743 0.178365946 0.178671509 0.179024622 0.179389283 0.179751903 0.180110365 0.180496916 0.180877596 0.181239858 0.181631655 0.182083562 0.182603076 0.183110639 0.183632597 0.1841885 0.184762836 0.185354456 0.185923845 0.186499074 0.187088996 0.187694356 0.188293383 0.188837498 0.189393207 0.18996647 0.190517262 0.191047534 0.191565081 0.192097783 0.192640498 0.193161845 0.193717584 0.194297493 0.194826737 0.195332661 0.19585903 0.196378961 0.196853757 0.197302669 0.197748184 0.19821623 0.198676795 0.199102134 0.199510604 0.199878901 0.200212523 0.200497642 0.200699255 0.200837329 0.2008311 0.200685009 0.200452924 0.20008032 0.199542239 0.198826656 0.197941482 0.196886882 0.195667267 0.19426167 0.192699835 0.190994605 0.189145386 0.187187701 0.185187101 0.183182791 0.181170985 0.17912963 0.177156404 0.175310105 0.173534051 0.171822622 0.170150384 0.168542415 0.167036727 0.1656477 0.164424732 0.163402438 0.162571669 0.161950201 0.161570162 0.161390752 0.161379576 0.161470532 0.161544144 0.161585018 0.161585376 0.161405563 0.161069974 0.160613194 0.1600115 0.159245417 0.158380285 0.157505944 0.156590387 0.15563339 0.154686883 0.153858468 0.153197229 0.152637646 0.152182132 0.151844412 0.15155229 0.151235819 0.15088886 0.150500119 0.150131047 0.149731472 0.149310365 0.148942128 0.148707628 0.148493841 0.148214757 0.148006409 0.14787963 0.147777796 0.147651508 0.147572652 0.147605106 0.147725165 0.147839442 0.147972614 0.148126468 0.148188651 0.14819409 0.14818202 0.148173735 0.148159742 0.148066074 0.147969991 0.147901908 0.147781387 0.147668958 0.14749001 0.147373036 0.147364825 0.147234872 0.147118613 0.147077188 0.146990597 0.146840259 0.146715447 0.146503642 0.14619346 0.145745844 0.145240843 0.144709602 0.144081354 0.143315643 0.142603636 0.141893953 0.140993014 0.139985457 0.1390948 0.138230875 0.137221262 0.136096328 0.134943575 0.133827731 0.132685199 0.13141638 0.130136117 0.129010603 0.127877012 0.126621127 0.125341222 0.124281108 0.123163559 0.121898957 0.120658763 0.119470865 0.118253551 0.116977304 0.115778372 0.114680134 0.113508932 0.11242146 0.111378685 0.110473223 0.109594531 0.108614571 0.107707597 0.10709656 0.106538586 0.105765156 0.105159499 0.104776181 0.104488544 0.104165629 0.103937656 0.103982255 0.104035489 0.103885531
"14" 0.264113486 0.266688347 0.269278467 0.271831095 0.274475098 0.277135432 0.279833555 0.282509804 0.285263956 0.288048089 0.290774286 0.293556899 0.296292722 0.29914397 0.302007139 0.304807067 0.30761832 0.310453326 0.31333217 0.316180766 0.319091171 0.321973741 0.324886233 0.327793479 0.330702364 0.333509743 0.336375654 0.33926034 0.342094213 0.344984442 0.347810835 0.350650549 0.3534756 0.356297463 0.359084368 0.36190033 0.364584357 0.367342234 0.370009154 0.372659206 0.375323385 0.377956867 0.380490571 0.383058012 0.385580719 0.388019085 0.390403837 0.392845869 0.395175338 0.397512436 0.399750918 0.401990682 0.404131591 0.406257451 0.408354163 0.410342276 0.412280083 0.414144158 0.416046381 0.417819172 0.419540644 0.42130056 0.422950059 0.424667954 0.42630288 0.427917957 0.429503292 0.431255639 0.432839006 0.434568167 0.436185032 0.43778339 0.439562857 0.441042095 0.442803442 0.444246083 0.445809633 0.447384238 0.448850065 0.450265259 0.451665461 0.452976644 0.454176158 0.455316365 0.456276119 0.457155377 0.457818389 0.458284646 0.458619863 0.458938688 0.459159613 0.459269822 0.459294558 0.459279448 0.459218621 0.459215909 0.459321976 0.45934701 0.459343821 0.459525973 0.459596694 0.459906995 0.460352927 0.460861742 0.461536765 0.462104231 0.463072896 0.46378091 0.464612454 0.46555987 0.466525823 0.465039372 0.466092736 0.467120618 0.468169987 0.469198912 0.470251471 0.471351773 0.472536772 0.473572403 0.474673301 0.475792229 0.47695595 0.478076041 0.479195714 0.480328739 0.48144415 0.482616931 0.483749598 0.484791607 0.485906631 0.487056464 0.488190353 0.489270061 0.490393102 0.491510272 0.492609739 0.493726671 0.494865388 0.4960289 0.49715212 0.49826166 0.499368161 0.500416338 0.501475394 0.502536833 0.50363189 0.504608989 0.505574703 0.506523728 0.507429719 0.508295655 0.509140909 0.509991705 0.510714173 0.511373639 0.512015224 0.512620926 0.513178468 0.513703704 0.514154255 0.514538586 0.514888525 0.51515919 0.515327215 0.515450299 0.515475571 0.515377462 0.51516223 0.514786005 0.514283657 0.513557136 0.512639046 0.511500835 0.510097444 0.508466005 0.506613851 0.504429698 0.502026677 0.499449611 0.496685952 0.49372226 0.490564227 0.487271309 0.483956486 0.480584145 0.477238148 0.474004507 0.470970333 0.468133479 0.46547246 0.463065445 0.460889101 0.458960772 0.457229525 0.455600291 0.454075336 0.452609181 0.451224566 0.449822634 0.448413372 0.447041392 0.445697993 0.444461167 0.443305403 0.442276001 0.441413224 0.440699041 0.440157235 0.439801276 0.439601868 0.439542919 0.439628243 0.439870358 0.440289348 0.4408755 0.441639841 0.442618728 0.443830371 0.445202976 0.446737409 0.448386729 0.450073153 0.451781452 0.453483135 0.455150187 0.456777573 0.458365977 0.459925145 0.461402327 0.462811828 0.46412456 0.465356976 0.466505051 0.467559755 0.468535244 0.469455898 0.470304996 0.471072018 0.471797347 0.472465694 0.47307229 0.473613024 0.474130094 0.474656492 0.47519967 0.475768834 0.47637108 0.47700274 0.477716625 0.47848326 0.479279011 0.48010084 0.480926543 0.481671244 0.482350975 0.482962161 0.483480185 0.483858585 0.48408857 0.484182 0.484108657 0.48384583 0.483398497 0.482761025 0.481951922 0.48089686 0.479615003 0.478148639 0.47648257 0.474584788 0.472478688 0.470202625 0.467749 0.465079725 0.462262392 0.459344327 0.456305861 0.45314917 0.449888676 0.446610421 0.443265498 0.439919889 0.436630815 0.433411628 0.430272818 0.427211344 0.424209595 0.421267956 0.418416053 0.415666282 0.413036942 0.410536915 0.408181489 0.405969471 0.403832942 0.401685983 0.399481118 0.397110015 0.394431025 0.391350269 0.387869388 0.38397789 0.379588395 0.374715745 0.369417876 0.363724768 0.357620806 0.351196855 0.344522983 0.337676525 0.330713809 0.323704571 0.316761166 0.30998379 0.303433359 0.297175616 0.291299552 0.285884827 0.280944139 0.27642405 0.27235803 0.26877445 0.26564905 0.262906849 0.260543287 0.258569986 0.256943703 0.255596191 0.254507303 0.253657639 0.252995878 0.252484351 0.25209102 0.251788467 0.251564711 0.251368582 0.251184583 0.251034468 0.250905126 0.250789076 0.250707597 0.250691384 0.250757217 0.250901133 0.251154959 0.251499832 0.251937687 0.25248298 0.253104717 0.253794134 0.254534364 0.255332917 0.25618279 0.257063031 0.257980376 0.258936971 0.25990653 0.260896683 0.261908889 0.262949169 0.264012784 0.265092224 0.266167253 0.267217398 0.268274307 0.269336551 0.270383239 0.271397352 0.272361159 0.273285687 0.274147451 0.27494514 0.275709987 0.276429027 0.27709496 0.277722865 0.278334081 0.278927803 0.279518425 0.280086935 0.280643255 0.281222761 0.281794906 0.282356322 0.282946229 0.283544242 0.284136713 0.284715563 0.285266846 0.28579244 0.286325455 0.286857396 0.287359715 0.287857383 0.288352728 0.288847059 0.289351851 0.289858609 0.290378332 0.290935695 0.291546285 0.292220891 0.292964965 0.293802202 0.294725835 0.295745134 0.296856552 0.298048556 0.299283415 0.300560266 0.301891476 0.303220451 0.304523379 0.305841953 0.307161868 0.308455437 0.30973345 0.310965806 0.312150478 0.313316137 0.314412981 0.315472364 0.316465199 0.317386806 0.31826055 0.319062531 0.319781721 0.320423752 0.320960701 0.321382403 0.32169655 0.321885705 0.321941912 0.32185474 0.321625561 0.32126072 0.32077992 0.320183873 0.319488257 0.31876272 0.318037689 0.317352772 0.316745102 0.316237509 0.315804541 0.31544143 0.315132797 0.314870387 0.314601779 0.314302325 0.313964725 0.313525915 0.312983274 0.312360585 0.311648041 0.310859561 0.310029656 0.309183836 0.308331192 0.307493389 0.306668788 0.305847466 0.305022418 0.304206729 0.303326607 0.302355319 0.30133903 0.300341487 0.299422801 0.298614442 0.297989964 0.297553867 0.297308266 0.297267288 0.29735291 0.297535717 0.2977916 0.298025846 0.298171699 0.298202276 0.298091322 0.297878712 0.297586232 0.297193289 0.296766073 0.296317071 0.295795649 0.295237839 0.294723362 0.294229597 0.293770015 0.293400288 0.293093711 0.29283601 0.29264015 0.292492092 0.292357445 0.292269021 0.292190522 0.292164385 0.292170763 0.292194247 0.29228723 0.292457521 0.29266268 0.292920977 0.293193579 0.293480664 0.293836892 0.294201612 0.294561595 0.294902384 0.295188695 0.295473963 0.295791328 0.296068549 0.296333998 0.296626776 0.296951115 0.297323048 0.297671139 0.298042715 0.298470885 0.298953503 0.299476177 0.298714697 0.299216121 0.299740523 0.300275207 0.300797641 0.301279336 0.301681399 0.301959783 0.302105457 0.302098811 0.301862806 0.301412046 0.300726056 0.299786866 0.298563898 0.297041595 0.295184523 0.292950034 0.290354908 0.287328035 0.28387931 0.27990821 0.275398672 0.270352036 0.264751613 0.258504152 0.251623243 0.244229659 0.236407354 0.228233203 0.219821632 0.211341649 0.20298171 0.194948465 0.187244326 0.180103377 0.173686713 0.168059394 0.163168043 0.158998281 0.155533642 0.152682573 0.150407851 0.148627281 0.147273228 0.146339178 0.145772636 0.145560578 0.145642906 0.145956337 0.14650014 0.147280455 0.148239598 0.149331778 0.150565773 0.151947603 0.153416693 0.154937342 0.156514078 0.158162445 0.159825251 0.161507145 0.163212866 0.164907292 0.166620135 0.168359563 0.170092016 0.171828985 0.17358321 0.175333992 0.177078396 0.178826988 0.180601016 0.182388842 0.184169769 0.185920313 0.187627509 0.189315826 0.190986663 0.192627445 0.194200814 0.1957414 0.197205558 0.198593974 0.199878901 0.201103255 0.202224672 0.203212172 0.204071268 0.204846352 0.205497503 0.205968365 0.206304491 0.206509233 0.206550747 0.206436306 0.206156671 0.205753624 0.205238819 0.204585135 0.203801036 0.202919483 0.201965004 0.200954065 0.199865133 0.198732957 0.197558388 0.196323916 0.195070177 0.193824545 0.19261536 0.19143261 0.190283567 0.18915464 0.188069433 0.187027335 0.186007917 0.185012832 0.184086248 0.18321979 0.182373106 0.181586683 0.180876464 0.18023102 0.179632157 0.179119051 0.178672671 0.178278521 0.177921295 0.177602515 0.177269638 0.176953509 0.176714823 0.17653735 0.17638886 0.176298574 0.176265687 0.176290363 0.176383972 0.176546052 0.176739886 0.176984429 0.177257314 0.177569106 0.177913219 0.178266287 0.178647488 0.17902787 0.179411173 0.179804474 0.180219889 0.18062827 0.181046918 0.181501299 0.182031736 0.182629943 0.183222771 0.183830127 0.184469551 0.185102493 0.185730115 0.186361864 0.187009335 0.187666267 0.18831037 0.18893224 0.189534768 0.190134674 0.190738887 0.191323251 0.19189091 0.192455456 0.193025291 0.193547219 0.19407025 0.194632143 0.195141762 0.195603535 0.196080744 0.196590871 0.197084159 0.197553501 0.19800818 0.198446408 0.198847696 0.199211597 0.199538633 0.199830979 0.200088605 0.200282156 0.200395152 0.200430349 0.200363979 0.200174198 0.199836567 0.199324906 0.198672071 0.197833225 0.19683978 0.195661098 0.194300845 0.192726791 0.191032439 0.189204425 0.187237173 0.185204566 0.183147505 0.181079566 0.179032177 0.176972464 0.175012931 0.173200279 0.171426699 0.169694841 0.168070376 0.166546062 0.165123492 0.163838074 0.162675992 0.161685348 0.160900563 0.160322487 0.1599641 0.159795418 0.15977864 0.159869149 0.160007611 0.160111934 0.160134777 0.160008311 0.159679681 0.159230143 0.158637434 0.157892719 0.157064825 0.156151384 0.155195415 0.15423663 0.153294072 0.15245983 0.151748374 0.151192278 0.15078564 0.150472775 0.150225654 0.149934605 0.149583697 0.149239033 0.148906261 0.148529872 0.148158759 0.147847816 0.147646278 0.147410318 0.147170305 0.146988854 0.146856815 0.146782011 0.146734059 0.146661103 0.146693051 0.14683494 0.146925122 0.147007465 0.147150114 0.147255123 0.147297055 0.147288993 0.147239 0.14720042 0.147152722 0.147080928 0.146980986 0.146947473 0.146898448 0.146784142 0.146710694 0.146685109 0.146624178 0.146550179 0.146487594 0.146461219 0.146389723 0.146243304 0.146012664 0.145715564 0.14540872 0.145003647 0.144518286 0.143967569 0.143242374 0.142582446 0.14191772 0.141088933 0.1402677 0.139375299 0.138570279 0.137648538 0.136557698 0.135604292 0.134541303 0.133380771 0.132224068 0.131059781 0.130061686 0.129062921 0.127845064 0.126578405 0.12550357 0.12456499 0.123420455 0.122249842 0.121218503 0.120202698 0.119107418 0.118033506 0.117031254 0.115992621 0.11492686 0.113859825 0.112906039 0.112097219 0.111346081 0.11063318 0.110008776 0.109356374 0.108710118 0.108325042 0.108102202 0.107746318 0.1074811 0.10742373 0.107272685 0.107119061 0.107154511
"15" 0.263957798 0.266502112 0.269088551 0.271648064 0.274273485 0.276916429 0.279596776 0.282256514 0.284999371 0.287767202 0.290494174 0.293236926 0.295969665 0.29881826 0.301644787 0.304441214 0.307241157 0.310058892 0.312933967 0.315761626 0.318668172 0.321531415 0.324424535 0.327339306 0.330224752 0.333039463 0.335890368 0.338784963 0.341615841 0.344495177 0.347329214 0.350188822 0.353003442 0.355827913 0.35863103 0.361448869 0.364136368 0.366912678 0.369586974 0.372265607 0.374925658 0.377558008 0.380097985 0.382685184 0.38521792 0.387694687 0.390089318 0.392556727 0.394921407 0.397282124 0.399541348 0.401812911 0.403983429 0.406147838 0.408261493 0.410288319 0.412247896 0.414142013 0.416071817 0.417887375 0.419673041 0.42145215 0.423156962 0.42492786 0.426614091 0.428276956 0.429914042 0.431712523 0.433358312 0.435130134 0.436781481 0.438457727 0.440270081 0.44182536 0.443602324 0.445114493 0.446731344 0.448364004 0.449877173 0.451356396 0.452770963 0.454124346 0.455383956 0.456559762 0.457593828 0.458510876 0.459203809 0.459722519 0.460117266 0.460488155 0.460734874 0.460888162 0.460979387 0.461021006 0.461027116 0.461077422 0.461173594 0.461263299 0.461322442 0.461485073 0.461603954 0.461937889 0.462353528 0.462914437 0.463612258 0.464225471 0.465137362 0.46591568 0.466732919 0.467741117 0.468635321 0.46716243 0.468236879 0.469277501 0.47032775 0.471341074 0.472388387 0.473490015 0.474660695 0.475689933 0.476782963 0.477889612 0.4790342 0.480131462 0.481227621 0.482325554 0.483423635 0.484552085 0.485644922 0.486660391 0.487763256 0.488896713 0.489998013 0.491028413 0.492140546 0.493238032 0.49428992 0.495370716 0.496481046 0.497615814 0.498721406 0.49981229 0.500888094 0.501906842 0.502936423 0.503968447 0.505027264 0.505977482 0.506922692 0.50783655 0.508678019 0.509491414 0.510289639 0.511092126 0.511774331 0.512372196 0.512961626 0.513515979 0.514021039 0.514487445 0.514886081 0.515210181 0.515484661 0.515679836 0.515786052 0.515853614 0.515822232 0.51567024 0.515414029 0.515000015 0.514448702 0.513683558 0.512733489 0.511571795 0.510135353 0.508491307 0.506628096 0.504437029 0.502023548 0.499435768 0.496666163 0.493705928 0.490564108 0.487296537 0.484007314 0.480664417 0.477352351 0.474157795 0.471147537 0.468333706 0.465687275 0.463283494 0.461108461 0.459169686 0.457419649 0.455777109 0.454237819 0.452761546 0.451362014 0.449950859 0.448523253 0.447136834 0.445794553 0.444551542 0.443377689 0.44234319 0.441473648 0.440737277 0.44016625 0.439785674 0.439549655 0.439446926 0.439502776 0.439703763 0.440080389 0.440623894 0.441337079 0.442258775 0.443400458 0.444699958 0.446148589 0.447698191 0.449294552 0.450912327 0.452521712 0.454093605 0.455626234 0.457110986 0.458569005 0.459958479 0.461280152 0.46250096 0.463637337 0.464693159 0.4656609 0.466543823 0.467373282 0.468150586 0.468844935 0.469492957 0.470085382 0.470621526 0.471101284 0.471561998 0.472025082 0.472506225 0.473013714 0.473550439 0.474108383 0.474744797 0.475425154 0.476130933 0.476858601 0.477587104 0.478246495 0.478839755 0.479368925 0.479814917 0.480138883 0.480321646 0.480378494 0.48026973 0.479978278 0.479525283 0.478901267 0.4781183 0.477091312 0.475842282 0.474421561 0.472814634 0.470980123 0.468943924 0.46674861 0.46438694 0.461820319 0.459112078 0.456302419 0.453388527 0.450364769 0.447242394 0.444095224 0.44087927 0.437661409 0.43449457 0.431396991 0.428373158 0.425420836 0.422512189 0.419668108 0.416913971 0.414251134 0.411697924 0.409266531 0.406979084 0.404830277 0.402754501 0.400671303 0.398526743 0.396229863 0.393639132 0.390662968 0.387299106 0.383537427 0.379301339 0.374603793 0.369495258 0.364003077 0.358114019 0.351912543 0.345463455 0.338845 0.332106948 0.32530053 0.31854482 0.31194523 0.305558965 0.299452141 0.293711409 0.288403898 0.283549741 0.279099107 0.275086701 0.271543905 0.268445328 0.265720353 0.263369858 0.261399895 0.259769782 0.258415267 0.257310614 0.256443068 0.25576508 0.255228654 0.254810438 0.254483968 0.254230812 0.254007816 0.253803104 0.253630623 0.253469452 0.253314525 0.25319995 0.25315164 0.253183752 0.253298193 0.253518328 0.253830791 0.254242674 0.254753426 0.255339712 0.25599812 0.256706774 0.257471725 0.258286342 0.259130493 0.260008752 0.260924146 0.261857867 0.262816533 0.263791725 0.26478596 0.26580742 0.26685071 0.267888248 0.268901899 0.269928187 0.270961657 0.271972269 0.272954091 0.273888677 0.274784163 0.27562587 0.276392892 0.277119741 0.277813435 0.278455526 0.27905944 0.279653072 0.2802255 0.280783728 0.281319514 0.281852499 0.282403797 0.282948792 0.283491179 0.284056529 0.284629628 0.285200968 0.285756931 0.286285132 0.286793679 0.287310585 0.287816033 0.288295105 0.288777843 0.289251924 0.289723277 0.29019849 0.290679932 0.291173905 0.291701511 0.292279601 0.292917937 0.293628141 0.294420555 0.295298889 0.29627724 0.297328904 0.298460498 0.299635485 0.300843 0.302095369 0.303354934 0.304598778 0.305852741 0.307109997 0.308345407 0.309567273 0.31073612 0.311861932 0.312982738 0.314034194 0.315037832 0.315977499 0.316853344 0.317677513 0.318435222 0.319118038 0.319727972 0.32023935 0.320632771 0.320930079 0.32111229 0.321161315 0.321074799 0.320863515 0.320531175 0.320080549 0.319520041 0.318879604 0.318211615 0.317539707 0.316900373 0.316330835 0.315848887 0.315424368 0.315054417 0.314735889 0.314461961 0.314178169 0.313861549 0.313500524 0.313038528 0.31247364 0.311830431 0.311098158 0.310314164 0.309492618 0.308651149 0.307810292 0.306971639 0.306150749 0.305332631 0.304500595 0.303683132 0.30282186 0.301880032 0.300880268 0.299887747 0.298974484 0.2981617 0.297520444 0.297060147 0.296787679 0.296698898 0.296735719 0.296874642 0.297089085 0.297294781 0.297412142 0.297422141 0.297299251 0.297084644 0.296794489 0.296407551 0.295991525 0.295554668 0.295057058 0.294526726 0.294024676 0.293530568 0.293081194 0.292721465 0.292421848 0.292178065 0.29199326 0.291852102 0.291729644 0.291643128 0.291566789 0.291528657 0.291532442 0.291553721 0.291621894 0.291780651 0.29197824 0.2922135 0.292472467 0.292742863 0.293079033 0.293428794 0.293767214 0.294093803 0.294375792 0.294654027 0.294955194 0.295221254 0.295486331 0.295774445 0.296086386 0.296447232 0.296778694 0.297137186 0.297573388 0.298055306 0.298570797 0.297824785 0.298304945 0.298817262 0.299333096 0.299840271 0.300290897 0.300665513 0.300922766 0.301047981 0.301021248 0.300788045 0.30035758 0.299707189 0.29879193 0.297607973 0.296132103 0.294345275 0.292200938 0.289694697 0.28676331 0.283428371 0.279584765 0.275212079 0.270323709 0.264889956 0.258825555 0.252125695 0.244896755 0.237237431 0.229194112 0.220884711 0.212485567 0.204177819 0.196160182 0.188444369 0.181260847 0.174780801 0.169066168 0.164079964 0.159814402 0.156265356 0.153336093 0.150996357 0.149144426 0.147732258 0.146750405 0.146167658 0.14593745 0.146000251 0.146312155 0.14686127 0.147646278 0.14861159 0.149708569 0.150945351 0.152331956 0.153806083 0.155340813 0.156928942 0.158579938 0.1602576 0.161950417 0.16365952 0.165358998 0.167072214 0.168803759 0.170531943 0.172262661 0.174011827 0.175752677 0.177493691 0.179241911 0.181006208 0.182773933 0.184537522 0.186273448 0.187978782 0.189680703 0.191348113 0.192966521 0.194533102 0.196067989 0.197519243 0.198889703 0.200166784 0.201370366 0.202483974 0.203470252 0.204331674 0.205097564 0.205737576 0.206217282 0.206553385 0.20675128 0.20679225 0.206679344 0.206405409 0.206011772 0.205508702 0.204865448 0.204095975 0.203229234 0.20228304 0.201271169 0.200186759 0.199056901 0.197876841 0.196658738 0.195419952 0.194182649 0.192989714 0.19181893 0.19067727 0.189548619 0.188478865 0.187463313 0.186465748 0.185483031 0.184555985 0.183692418 0.182864092 0.182089068 0.181376159 0.180740297 0.180158481 0.17965585 0.179224692 0.178832844 0.178472728 0.178141862 0.177810863 0.177497402 0.177250192 0.177049324 0.176873177 0.176761664 0.176723644 0.176742949 0.176832408 0.176981144 0.177167296 0.177410319 0.177676529 0.177967526 0.178292364 0.178645454 0.179018386 0.179389887 0.179760769 0.180150695 0.180548742 0.180934064 0.181339286 0.181792431 0.182317406 0.182870291 0.183427684 0.184009314 0.184616193 0.185228474 0.18582698 0.186430469 0.187049165 0.187680312 0.188301876 0.188884869 0.189463988 0.190050572 0.190628074 0.191185392 0.191727996 0.192276619 0.192832895 0.193354532 0.193893917 0.194464818 0.19498425 0.195468098 0.195969887 0.196484916 0.196968958 0.197428085 0.197878182 0.198331319 0.198762245 0.199156865 0.199524619 0.19985494 0.200150564 0.200389899 0.200547203 0.200633839 0.20059754 0.200429603 0.200144745 0.199702613 0.199107155 0.19832994 0.197390631 0.19627399 0.194984056 0.193494231 0.191866137 0.190099515 0.18819128 0.186196133 0.184167303 0.182131179 0.180101581 0.178051047 0.176084667 0.174255192 0.172480375 0.170758732 0.16911038 0.167544238 0.16608011 0.164742887 0.163550362 0.162543893 0.161736116 0.161136344 0.160767131 0.160593085 0.160579108 0.160669841 0.160775878 0.160848476 0.160860077 0.160706937 0.160374828 0.159921668 0.159324467 0.158569068 0.157722555 0.156828664 0.155892901 0.15493501 0.153990477 0.153159149 0.152472802 0.151914962 0.151483886 0.151158594 0.150888972 0.150585212 0.150236279 0.149869576 0.149518654 0.149130672 0.148734562 0.148394972 0.148176953 0.14795208 0.147692531 0.147497632 0.147368222 0.147279903 0.147192784 0.147116877 0.147149079 0.147280052 0.147382282 0.147490039 0.147638291 0.147721887 0.147745572 0.147735506 0.147706367 0.147680081 0.147609398 0.14752546 0.147441447 0.14736443 0.147283703 0.147137076 0.147041865 0.147024967 0.146929525 0.146834396 0.146782391 0.146725908 0.146614991 0.146479376 0.146258153 0.145954512 0.145577282 0.145122245 0.144613944 0.144024462 0.143279009 0.142593041 0.141905837 0.141040973 0.140126579 0.139235049 0.138400577 0.1374349 0.136327013 0.135273933 0.134184517 0.133032985 0.131820224 0.130597949 0.129536144 0.128469966 0.127233095 0.125959814 0.124892339 0.123864274 0.122659706 0.121454302 0.120344684 0.119228125 0.118042361 0.116905939 0.115855694 0.114750776 0.11367416 0.112619255 0.111689631 0.110845875 0.109980326 0.109170388 0.108552668 0.10794748 0.107237637 0.10674227 0.106439192 0.106117431 0.105823364 0.105680693 0.10562747 0.105577275 0.105520021
"16" 0.255466372 0.2579965 0.26057604 0.263149232 0.265756845 0.268388778 0.271058083 0.273718536 0.276475668 0.279247075 0.2819812 0.284725606 0.287492424 0.290326118 0.293177009 0.29600355 0.298738033 0.301502496 0.304326087 0.307176352 0.310158879 0.313062698 0.316039026 0.318990022 0.321946532 0.324835986 0.327754259 0.330778778 0.333754569 0.336712182 0.339645982 0.342564225 0.345479518 0.348388284 0.351247758 0.354102463 0.356858045 0.359694421 0.362488687 0.365291715 0.368069053 0.37077558 0.373371482 0.376029253 0.378718227 0.381281137 0.383802325 0.386407256 0.388877749 0.391362339 0.39371866 0.396102756 0.39835459 0.400656402 0.402853787 0.405033827 0.407024324 0.408963114 0.410824656 0.412663221 0.414539814 0.416502357 0.418334067 0.420208424 0.421997279 0.42371276 0.425445139 0.427289397 0.429094791 0.43102926 0.432818025 0.434606016 0.436443537 0.437992096 0.439660609 0.44107306 0.442569435 0.444136381 0.445725828 0.447285444 0.448794961 0.450281769 0.451584995 0.452796668 0.453837246 0.45481348 0.455478579 0.456134468 0.456519157 0.456880569 0.457229793 0.457372576 0.457522213 0.457634389 0.457624316 0.45777905 0.457773566 0.457865179 0.457903206 0.458030522 0.458253413 0.458572954 0.459006429 0.459578276 0.460306287 0.461079061 0.462001234 0.462760836 0.46364364 0.46462208 0.465552896 0.464076489 0.465094179 0.466132075 0.467181921 0.468217432 0.469266534 0.470434546 0.471672863 0.472746342 0.473858505 0.474963844 0.476140618 0.477308512 0.478458017 0.479602814 0.480719656 0.481815219 0.482914388 0.483931154 0.485014915 0.486081362 0.487178743 0.488171011 0.489186108 0.490222782 0.491234988 0.492240101 0.493271351 0.494334221 0.495325923 0.496300429 0.497272879 0.498222679 0.499202549 0.500179112 0.501186967 0.502113938 0.503033698 0.503920376 0.504778206 0.505585849 0.506407261 0.507208586 0.507896602 0.508520544 0.509156704 0.509716749 0.510184824 0.510652721 0.511049688 0.511325777 0.511528611 0.511669636 0.511682808 0.511566103 0.511339903 0.51097244 0.510484338 0.509824991 0.509017766 0.507999063 0.506787121 0.505356252 0.503650844 0.501711905 0.499526978 0.497021139 0.494294852 0.491366923 0.48822692 0.484886289 0.481362998 0.477732956 0.47410655 0.470426053 0.466796666 0.463322341 0.4600631 0.457015544 0.454173148 0.45156005 0.449219257 0.44714886 0.445259809 0.443474829 0.441779763 0.440151721 0.438610077 0.437046468 0.435476899 0.43394804 0.432465345 0.431087077 0.429797173 0.428653955 0.427674115 0.426852077 0.426170141 0.42568171 0.425329506 0.425104231 0.425043255 0.425125778 0.425395846 0.425846636 0.426470429 0.427321225 0.428412884 0.429678321 0.431090087 0.432595164 0.434160382 0.435747147 0.437328368 0.4388825 0.440399975 0.441884637 0.443331063 0.444696993 0.445999086 0.447204858 0.44832924 0.449365795 0.450306714 0.451158166 0.45194605 0.452675819 0.453327239 0.453909099 0.454428166 0.454889715 0.455290705 0.455695421 0.456106305 0.456538975 0.457002431 0.457511067 0.458009362 0.458563268 0.459147453 0.459754616 0.460357875 0.460927784 0.461427808 0.461868197 0.462215275 0.462456644 0.462608784 0.462642223 0.462573856 0.462364316 0.462017059 0.461559474 0.460965961 0.460234523 0.459290236 0.458163202 0.456883639 0.455402523 0.453701347 0.451776296 0.449642003 0.447319239 0.444772482 0.442061305 0.439210713 0.436204582 0.433059454 0.42979607 0.426454306 0.423008829 0.419534624 0.416087329 0.41269362 0.409369916 0.406130761 0.40295592 0.399855405 0.396859109 0.393971264 0.39120084 0.388567716 0.386101902 0.383788556 0.381538749 0.37929374 0.376984358 0.374529034 0.371789098 0.368664771 0.365160286 0.361256123 0.356874228 0.352025002 0.346783161 0.341175437 0.335160106 0.32883805 0.322293341 0.315605551 0.308802843 0.301954716 0.295173019 0.288565874 0.282198668 0.276118875 0.270417988 0.265162826 0.260362566 0.255974144 0.252030581 0.248550326 0.245509356 0.242849857 0.24056153 0.2386453 0.237067893 0.235764742 0.234708786 0.233888999 0.23325856 0.232758492 0.232374579 0.232070431 0.231835112 0.231639832 0.231467173 0.231315687 0.23117432 0.231036037 0.230932802 0.230889559 0.230926305 0.23104687 0.231263176 0.231570482 0.231986269 0.232490748 0.233059406 0.233703882 0.234399453 0.235141397 0.235929489 0.236757979 0.237611234 0.238496333 0.239408255 0.24034667 0.241308033 0.242286131 0.243279681 0.244312182 0.245340362 0.246325463 0.247315943 0.248323724 0.24929738 0.250248134 0.251151323 0.252018124 0.252844036 0.253592819 0.254292458 0.254962087 0.255597442 0.256185293 0.256753922 0.257320911 0.257882446 0.258407086 0.258937478 0.259455383 0.259952039 0.260464966 0.261000723 0.261541724 0.262086213 0.26261586 0.263112515 0.263597012 0.264096916 0.264576763 0.265025735 0.265488029 0.265948355 0.266401678 0.266850948 0.26730001 0.267773688 0.268285453 0.268854618 0.269474447 0.270158827 0.270915359 0.271772444 0.272723317 0.273726493 0.27481696 0.275959164 0.277149707 0.278372943 0.279597729 0.280825138 0.282051086 0.283256173 0.284452677 0.285656393 0.28680715 0.287911594 0.288988829 0.289991677 0.290941536 0.291838765 0.292668551 0.293457538 0.294187009 0.294831902 0.295411408 0.295896441 0.296267927 0.296541691 0.296692908 0.296733499 0.296639442 0.296412021 0.296054006 0.29558292 0.295003951 0.294343114 0.293654352 0.292967558 0.292320609 0.291733772 0.291222215 0.290766776 0.290358603 0.289992154 0.289640367 0.289276391 0.288885921 0.288457036 0.287962407 0.287374973 0.286690861 0.285936147 0.285135329 0.284285843 0.283421755 0.282559276 0.281699598 0.280846238 0.279991537 0.279134542 0.278271317 0.2773678 0.276407808 0.275384307 0.274373174 0.273440182 0.272599578 0.271938771 0.271473229 0.271184593 0.27108106 0.271131486 0.271274984 0.271486074 0.271684796 0.271798909 0.271820366 0.271725148 0.271512866 0.271227479 0.27087447 0.270470977 0.270030022 0.269523352 0.269014329 0.268522054 0.268047065 0.267621696 0.267276973 0.267003566 0.26678583 0.266614497 0.266482711 0.266361445 0.266264707 0.266180426 0.266151011 0.266150087 0.266160131 0.266194701 0.266297162 0.266456217 0.266642392 0.266875297 0.267133951 0.267437965 0.267758876 0.268070668 0.268364459 0.268635422 0.268906176 0.269175917 0.269408077 0.269619465 0.269862264 0.270137876 0.27045989 0.270771533 0.27108857 0.271465421 0.271919668 0.272399843 0.271694332 0.272155732 0.272628695 0.273109227 0.273594737 0.274036914 0.2743752 0.274608701 0.274711788 0.274661779 0.274448991 0.274053723 0.273423135 0.272533864 0.271391273 0.269958466 0.26821357 0.266130924 0.263675183 0.260801196 0.257521242 0.25378114 0.249511048 0.244769722 0.239496931 0.233656675 0.227247 0.220376477 0.213136867 0.205527306 0.197707698 0.189859241 0.182152972 0.174752668 0.167686597 0.161159545 0.155303374 0.150153905 0.145657852 0.141837418 0.138665408 0.136068821 0.134000272 0.132366449 0.131124169 0.130253151 0.129761398 0.129565164 0.129637912 0.129937112 0.13043125 0.131147772 0.132029593 0.133024022 0.134151712 0.135406107 0.136740431 0.138138339 0.139580607 0.141068846 0.142603189 0.144128904 0.145672739 0.1472314 0.148803309 0.150371864 0.151922733 0.153482839 0.155087933 0.156698018 0.158320457 0.159939244 0.161554739 0.163163662 0.16477856 0.166364938 0.167939097 0.169511199 0.171054065 0.17253758 0.173964992 0.175368533 0.176719591 0.177987039 0.179154068 0.180255279 0.181264788 0.182173535 0.182963416 0.183658376 0.184239715 0.1846838 0.185004845 0.185173795 0.185211152 0.185098514 0.184840947 0.184432939 0.183950096 0.183357447 0.18261084 0.181797087 0.180928871 0.179988831 0.178998008 0.177951902 0.176860645 0.175741687 0.174619466 0.173475906 0.17237179 0.171295971 0.170267463 0.169242337 0.168257877 0.167304352 0.166393951 0.165513948 0.164659619 0.163858175 0.163121372 0.162439257 0.161791712 0.161238313 0.160766572 0.160340235 0.159962937 0.159637094 0.159329891 0.159045503 0.158769548 0.158530086 0.158311218 0.158135086 0.157998666 0.157897562 0.157870486 0.157913774 0.157991365 0.158126459 0.158330888 0.158570454 0.1588424 0.159139559 0.159445047 0.159779117 0.160126567 0.160475954 0.160820499 0.161182046 0.161558956 0.161948889 0.162346587 0.162794873 0.163280979 0.163786277 0.164321646 0.164862126 0.165434733 0.165993333 0.166535184 0.167106077 0.167687982 0.168253079 0.168815047 0.169338897 0.169878453 0.170417979 0.170905471 0.171398997 0.171899468 0.172412753 0.172899634 0.173372447 0.173878506 0.174419686 0.17489168 0.17533192 0.175805509 0.17629233 0.17674087 0.177174896 0.177617729 0.17804566 0.178464353 0.178838044 0.179194808 0.179525346 0.179804981 0.180027649 0.180170536 0.180213839 0.180150062 0.179980427 0.179686114 0.179289401 0.178708196 0.177945673 0.177025348 0.17598401 0.174760997 0.173343807 0.171786055 0.170128226 0.168381065 0.16654937 0.164705247 0.162866339 0.161040708 0.159237832 0.157524675 0.15592362 0.154370472 0.152865857 0.151397482 0.150022924 0.148734659 0.147549778 0.146505207 0.145579189 0.144844025 0.144288555 0.143907532 0.143712968 0.143664956 0.143720657 0.143802479 0.143831596 0.143811405 0.143664598 0.143345326 0.142916739 0.142346412 0.141653955 0.140890762 0.140070856 0.139204293 0.138298795 0.137439191 0.136694983 0.136078402 0.135567904 0.135177761 0.134912223 0.134711072 0.134483248 0.134180471 0.133836731 0.133508444 0.133179292 0.132843494 0.132532805 0.132280141 0.132085592 0.131883025 0.131685123 0.131519511 0.131425619 0.131335452 0.13123624 0.131279886 0.131437823 0.131535798 0.131591469 0.131654158 0.131731212 0.131769255 0.131748885 0.131736413 0.131722286 0.131621644 0.131510258 0.131507337 0.13146767 0.131378293 0.131331682 0.131235272 0.131190404 0.13118735 0.131217301 0.131155029 0.131092086 0.130975217 0.1308081 0.130637363 0.130377546 0.129994348 0.129606515 0.129222617 0.128743991 0.128025368 0.127351016 0.126720205 0.125944287 0.12515527 0.12439283 0.123605907 0.122693427 0.121679328 0.120657727 0.119605951 0.118580997 0.117524736 0.116507523 0.115519218 0.114455201 0.113345623 0.112220854 0.111265957 0.110295005 0.109228067 0.108297609 0.107310884 0.106205918 0.105159611 0.104189932 0.103165388 0.102094702 0.101058036 0.100209445 0.099508293 0.098844513 0.09813939 0.097402409 0.096705519 0.096144713 0.095658742 0.095341049 0.095008135 0.094633803 0.09445288 0.094319046 0.094255678 0.094213158 0.094168849
"17" 0.244404539 0.246862695 0.249416009 0.251893401 0.254486054 0.257085592 0.259718925 0.262370408 0.265105695 0.267864555 0.270626307 0.27337414 0.27618736 0.279054374 0.281949341 0.284782231 0.287598133 0.290364206 0.293222725 0.296166509 0.299251884 0.302246898 0.305337787 0.308419377 0.311490923 0.31449759 0.317549139 0.320698768 0.323849499 0.326934963 0.330042362 0.333124757 0.336207569 0.339265704 0.34227702 0.345286161 0.348187327 0.351226568 0.354223073 0.357224435 0.360210299 0.363131523 0.365891993 0.368730038 0.371530771 0.37432763 0.377039313 0.379861236 0.38248378 0.385163188 0.38767916 0.390307426 0.392764986 0.39525491 0.397650808 0.399959356 0.402113408 0.404181302 0.406219125 0.408255816 0.410302281 0.412472159 0.414472818 0.416562051 0.418484032 0.420434922 0.422335684 0.424373776 0.426406652 0.428536475 0.430531234 0.432512969 0.434512407 0.436235011 0.438001007 0.439469546 0.441142559 0.442888498 0.44460544 0.446283281 0.448031157 0.449655265 0.451145083 0.452540904 0.453782231 0.45483762 0.455729246 0.456447303 0.456989825 0.457515061 0.457977593 0.458331198 0.45865339 0.458929569 0.459117889 0.459218681 0.459490776 0.459637582 0.459796369 0.459954292 0.460287452 0.460752249 0.46118784 0.461934865 0.462743163 0.463484436 0.464515865 0.465444356 0.466389865 0.467496663 0.46843338 0.466866583 0.468018413 0.469154119 0.470321774 0.471469194 0.472651213 0.473898023 0.475197792 0.47636199 0.477607787 0.478884995 0.480185419 0.481428415 0.482680589 0.483940393 0.485185176 0.486429751 0.487646699 0.488797665 0.490034044 0.491261661 0.492465556 0.493614733 0.494785845 0.495966822 0.497122735 0.498271704 0.499440968 0.500657082 0.501800001 0.502918065 0.504020333 0.505099118 0.506199598 0.507308006 0.508427143 0.509443879 0.510438859 0.511411011 0.512324452 0.513184845 0.514027178 0.514877498 0.515604198 0.516231537 0.516842306 0.517409801 0.517923832 0.51839155 0.518779933 0.519058645 0.519261718 0.519370794 0.519391477 0.519293845 0.519053638 0.518652976 0.518132806 0.517446876 0.516625285 0.515568197 0.514333308 0.512874305 0.511117339 0.509139001 0.50690341 0.50428772 0.501437068 0.498360723 0.495067298 0.491544873 0.48784253 0.484029204 0.480192035 0.476307005 0.472502202 0.46886301 0.465424031 0.462217808 0.459208816 0.456455648 0.453964502 0.451752365 0.449743032 0.447842985 0.446047574 0.444315076 0.442663223 0.441003174 0.439331353 0.43773517 0.436208189 0.434761226 0.433400512 0.432211846 0.431209177 0.430366784 0.429677606 0.429190338 0.428865463 0.428691685 0.428696066 0.428848594 0.429192811 0.429726094 0.430435866 0.43139106 0.432593435 0.433977455 0.435518295 0.437179446 0.438878834 0.440599233 0.442330956 0.444016546 0.44565776 0.447244734 0.448792905 0.450254887 0.451658875 0.452948928 0.454138368 0.455243707 0.456262797 0.457195729 0.458066314 0.458863258 0.459582061 0.460234255 0.460812449 0.461339682 0.461806327 0.462251037 0.462707698 0.46320647 0.463739812 0.464315802 0.464902133 0.465565085 0.46624282 0.466947079 0.467671365 0.468378156 0.46900779 0.469536841 0.469985515 0.470338732 0.470545262 0.470617354 0.470573843 0.470359772 0.46998316 0.46945858 0.468773931 0.46792528 0.466833055 0.465518266 0.464036137 0.462346137 0.460433334 0.458300292 0.455954671 0.453426212 0.450660318 0.447718054 0.444660932 0.441479921 0.438174397 0.434733003 0.431230605 0.427642077 0.42402184 0.420434713 0.41689831 0.413446337 0.410108805 0.406849176 0.403673828 0.40059191 0.397624403 0.394810319 0.392141908 0.389628887 0.387281984 0.38501358 0.38273406 0.380396456 0.377904505 0.375107229 0.371925086 0.368347645 0.364352018 0.359871238 0.354921401 0.349551618 0.343789101 0.337621629 0.331160873 0.324469 0.317611724 0.310649067 0.303648353 0.296721786 0.289989322 0.283494174 0.277286768 0.271474183 0.266108871 0.261203766 0.256728351 0.252691478 0.249127671 0.246022657 0.243307009 0.240961224 0.238996461 0.237376064 0.236022592 0.234922469 0.234066889 0.233394176 0.23286745 0.232462332 0.232151061 0.231920019 0.231716648 0.231537133 0.231391177 0.231256709 0.231117174 0.231002286 0.230947196 0.230955273 0.23104614 0.231246263 0.231548324 0.231953248 0.232453212 0.233036667 0.233704165 0.234420836 0.235182405 0.23599416 0.236839905 0.237720847 0.23863931 0.239577621 0.240540877 0.241528407 0.24253054 0.243552595 0.244599521 0.245647326 0.246676907 0.247704208 0.248734534 0.249746561 0.250714749 0.251646906 0.252558798 0.253416598 0.25419575 0.254926711 0.25561288 0.256253362 0.256854683 0.257443875 0.258021355 0.258594006 0.259137541 0.259671956 0.260224819 0.260769397 0.261309922 0.261877894 0.26245448 0.263033211 0.263607383 0.264138937 0.264644086 0.26516363 0.265668005 0.266143739 0.266634643 0.267109841 0.267571568 0.268037796 0.268526137 0.269029945 0.269564509 0.270142078 0.270775884 0.271493047 0.272288442 0.273169219 0.274155259 0.275206298 0.276346296 0.277565241 0.278823227 0.280106902 0.281385183 0.282669961 0.283956707 0.285236448 0.286498636 0.287743777 0.288931876 0.290078908 0.291208476 0.29227528 0.293298244 0.294260889 0.295164138 0.296005219 0.296779394 0.297472864 0.29808706 0.298622757 0.299052417 0.299378663 0.299588412 0.299673557 0.299614131 0.299432665 0.299129486 0.29870218 0.298155993 0.297527492 0.296868593 0.296190947 0.295555741 0.294978946 0.294480443 0.294043213 0.293656796 0.293313354 0.292988718 0.292653352 0.292295337 0.291872084 0.291367739 0.290793896 0.29013142 0.289381981 0.288579196 0.287715048 0.286826491 0.285946429 0.285072803 0.284225971 0.283375114 0.282499671 0.281648815 0.280759871 0.279792964 0.278771222 0.277766585 0.27683112 0.275991529 0.275336713 0.274853826 0.274545819 0.274450868 0.274504185 0.274634033 0.274827659 0.275013685 0.275107294 0.27508983 0.274957448 0.274720877 0.274403721 0.274004698 0.2735717 0.273102343 0.272573382 0.272018939 0.271477729 0.270947039 0.270475835 0.270081758 0.269759893 0.269506931 0.269293576 0.269128501 0.268975407 0.268862844 0.268765479 0.268698812 0.268665731 0.268660218 0.268692911 0.268826365 0.269015044 0.269221127 0.269467235 0.269723177 0.270027727 0.270327151 0.270620048 0.270925254 0.271187842 0.271457314 0.271716386 0.271938354 0.27216661 0.272408426 0.272678405 0.273007482 0.273300856 0.273607939 0.274012089 0.274434656 0.274880379 0.274185985 0.274686038 0.275210977 0.275740653 0.276253879 0.276691973 0.277046889 0.277294397 0.277416825 0.277359843 0.277119279 0.276697874 0.276057541 0.275154799 0.273990929 0.272519052 0.270721287 0.268585443 0.266120642 0.263252407 0.259942919 0.256159604 0.251890451 0.247121438 0.241812125 0.235923335 0.229463428 0.222539246 0.21523501 0.207586005 0.199706897 0.191802248 0.184020966 0.176536366 0.169389457 0.162771508 0.15682286 0.151604667 0.14704138 0.143137544 0.139893338 0.137207255 0.135076463 0.133380279 0.13207221 0.131148636 0.130585864 0.13032411 0.130318075 0.130544811 0.131016791 0.131713659 0.132558107 0.133509353 0.134601578 0.135829106 0.137146115 0.138530985 0.139982134 0.141467065 0.14296785 0.144486129 0.146034285 0.147563145 0.149104595 0.150678381 0.152263135 0.153846264 0.155454338 0.157055184 0.158678338 0.160299078 0.161918312 0.163542688 0.165170684 0.166766539 0.168343037 0.169916391 0.171459511 0.172976196 0.174440861 0.175868705 0.177226841 0.178525522 0.179723501 0.180830225 0.181861758 0.182795405 0.183588237 0.184305161 0.184925407 0.185399726 0.185742915 0.185943067 0.186006561 0.185935095 0.185720503 0.185372531 0.184913695 0.184344441 0.183649838 0.182876393 0.182038918 0.181127608 0.180150643 0.179097623 0.178009674 0.176902547 0.175767183 0.174633056 0.173527732 0.172440127 0.171374738 0.170336813 0.169349089 0.168392852 0.167462707 0.166551307 0.16568698 0.164893642 0.164153084 0.163450822 0.162777677 0.162212476 0.161720708 0.161239773 0.160830468 0.160482228 0.160157397 0.159848645 0.159567401 0.159323275 0.159121603 0.15895541 0.158810854 0.158730835 0.158713087 0.15874429 0.15882735 0.158973187 0.159180716 0.159412235 0.159658283 0.159941122 0.160261944 0.160613582 0.160975516 0.161333993 0.161691412 0.162079856 0.162485003 0.162871882 0.163290396 0.163760468 0.164285883 0.164810389 0.165332526 0.165914565 0.166513145 0.167115688 0.16768302 0.168235376 0.168830708 0.169428855 0.170012474 0.170563236 0.17113255 0.171698645 0.172235578 0.172761396 0.173285112 0.173808023 0.17433688 0.174841776 0.175341457 0.175861746 0.176348463 0.176824331 0.177287728 0.177744687 0.178178415 0.178576961 0.178997368 0.179428935 0.179830134 0.18020533 0.180560231 0.180858552 0.181113899 0.181336582 0.181467742 0.181509346 0.181436718 0.181243181 0.180964932 0.180545926 0.17994459 0.179172009 0.178253829 0.177174449 0.175916553 0.174461544 0.172869965 0.171208888 0.169451848 0.167592704 0.165706366 0.163874239 0.162055731 0.160253346 0.158526272 0.156906605 0.155344799 0.15381448 0.152349919 0.150945172 0.149601579 0.148423851 0.147375911 0.146420121 0.145664886 0.145127237 0.14479959 0.144631371 0.14461273 0.144706354 0.144787073 0.144844607 0.144865453 0.144709468 0.144342393 0.143878579 0.143318549 0.142559066 0.14172776 0.140887603 0.140030697 0.139136463 0.138217792 0.137445137 0.136828244 0.136309773 0.135866389 0.135537535 0.135294288 0.13502717 0.134742528 0.134430692 0.134092391 0.133749008 0.133399442 0.133068725 0.13284637 0.132635683 0.132388875 0.132211119 0.132042035 0.131917298 0.131803483 0.131737441 0.131771743 0.131887615 0.131979451 0.132114798 0.132238552 0.132322177 0.132379323 0.132370934 0.132302061 0.132294089 0.13223733 0.132105336 0.132067189 0.132055253 0.132022336 0.131931424 0.131809354 0.131741613 0.131689966 0.131668806 0.1317527 0.131762698 0.131606892 0.131406009 0.131304458 0.131134093 0.130763128 0.130348966 0.129897088 0.129390344 0.128724828 0.128127635 0.1275426 0.126783684 0.126035929 0.125292614 0.124482393 0.123651743 0.122678444 0.12164516 0.120728098 0.119662918 0.118472829 0.117422476 0.116615847 0.115688831 0.114536636 0.113396429 0.112503961 0.111678198 0.110466279 0.109366782 0.108539179 0.107595474 0.106472433 0.105432428 0.104621679 0.103677124 0.102610484 0.101834469 0.101277046 0.100533091 0.099745736 0.099086061 0.098397225 0.097663641 0.097029142 0.096737623 0.096615963 0.096413568 0.096070275 0.095859356 0.095944427 0.095892757 0.095822968
"18" 0.251531929 0.253976434 0.256515056 0.25897041 0.261509836 0.264086336 0.266655087 0.269286215 0.271936715 0.274648637 0.277320415 0.279998034 0.282722116 0.285506904 0.288269639 0.291015685 0.293745637 0.296525419 0.299298257 0.302118629 0.305005699 0.307826102 0.310710192 0.313617438 0.316508472 0.319290102 0.322141051 0.325039059 0.327914059 0.330756396 0.333615959 0.336446613 0.339295119 0.342093408 0.344892442 0.347654521 0.350388765 0.353124708 0.35582912 0.358532399 0.361225098 0.363885343 0.36641106 0.368987381 0.371518433 0.374045789 0.376439542 0.378927976 0.381311417 0.383704066 0.385981858 0.388301462 0.390455574 0.392684162 0.394873679 0.396911323 0.398866922 0.400759697 0.402690589 0.404528052 0.406366825 0.40825212 0.410066456 0.41187042 0.413558215 0.415327758 0.41705671 0.418840975 0.420602918 0.422484845 0.424189419 0.4259758 0.427781969 0.429417461 0.431087852 0.432568878 0.434209257 0.435872853 0.43738696 0.438922971 0.440444916 0.441832215 0.443121791 0.444353819 0.445468128 0.446499169 0.44721821 0.447895408 0.448349267 0.448865592 0.449267507 0.44950074 0.449801773 0.449960738 0.450145304 0.4502455 0.450492948 0.450594753 0.450805902 0.450938046 0.451234728 0.451646209 0.452113122 0.452741832 0.453456908 0.454104006 0.455058455 0.455936819 0.456842899 0.457799554 0.458767921 0.457291991 0.458315939 0.45932138 0.460358232 0.461363941 0.462383538 0.4635019 0.464692801 0.465768516 0.466890961 0.467990339 0.469128639 0.470208049 0.47129342 0.472436756 0.473546922 0.474654049 0.475718528 0.476799816 0.477917433 0.479016185 0.480080843 0.481137037 0.482213974 0.483267784 0.48430267 0.485298157 0.486326128 0.487410486 0.48843497 0.489467114 0.490467072 0.49141103 0.492388844 0.493382603 0.494379997 0.495298058 0.496215641 0.497118384 0.497952372 0.498733789 0.49951008 0.500313103 0.501010418 0.50162971 0.502263367 0.502844512 0.503352702 0.503845036 0.504280627 0.504657567 0.504969656 0.505214989 0.50535965 0.505401492 0.505350292 0.505177379 0.504894912 0.50446862 0.503912628 0.503133953 0.502187729 0.501039088 0.499631405 0.498004466 0.496164411 0.494023561 0.491651505 0.489079475 0.486326486 0.483394325 0.480271667 0.477025867 0.473754078 0.470420659 0.467112094 0.463922858 0.460921377 0.458112597 0.455453634 0.453033894 0.450842768 0.448889285 0.447127968 0.445461363 0.443883628 0.442394018 0.440962672 0.439519763 0.438084453 0.43667081 0.435322791 0.434071332 0.432885647 0.431841195 0.430946261 0.430183798 0.429579884 0.429176629 0.428912759 0.428784788 0.428823948 0.428994983 0.429340243 0.429853231 0.430550694 0.431421906 0.43251127 0.433787644 0.435204387 0.436706334 0.438248098 0.439806849 0.441361934 0.442890942 0.444394439 0.445862412 0.447283924 0.448628455 0.449911207 0.45110172 0.452222437 0.453252047 0.454189479 0.455050021 0.455863327 0.456631452 0.457312942 0.457950175 0.458537787 0.45905751 0.459529847 0.459988087 0.460470349 0.460983336 0.461527348 0.4620983 0.462671608 0.463303477 0.463970631 0.464660555 0.4653458 0.46600771 0.46660167 0.467123181 0.467565745 0.467906952 0.468126714 0.468214601 0.468206167 0.468055844 0.467765987 0.467338979 0.46677658 0.466085464 0.465168566 0.464061856 0.462821811 0.46139729 0.459752977 0.457901835 0.455874473 0.453667164 0.451240569 0.448636532 0.44591409 0.443070889 0.440079898 0.436951697 0.43376106 0.430467367 0.42716229 0.423893362 0.420665681 0.417501628 0.41441679 0.41138193 0.408411324 0.405537218 0.402756751 0.400097817 0.39757812 0.395219028 0.393021494 0.390895605 0.388772726 0.386582613 0.384241343 0.38161847 0.378614902 0.375229985 0.37145254 0.367207587 0.362499297 0.357362151 0.351832688 0.345888376 0.339636266 0.333149314 0.326491624 0.319707572 0.312865883 0.306088299 0.299462944 0.29305166 0.286916733 0.281155556 0.275828153 0.270945191 0.266457856 0.262416244 0.258857608 0.255739421 0.252980143 0.250594914 0.248593599 0.246927962 0.245523825 0.244372576 0.243465692 0.242758542 0.242189541 0.241746083 0.241392463 0.241110235 0.240871221 0.24065499 0.240466952 0.240299061 0.240140155 0.240013048 0.239944726 0.239940524 0.240022272 0.240213901 0.240510568 0.240907386 0.241396904 0.241959572 0.242597133 0.24328579 0.244033054 0.244828865 0.245660305 0.246529579 0.247423142 0.248339474 0.249279559 0.250238091 0.251209587 0.252218217 0.25324735 0.254272908 0.255280167 0.256286144 0.257294625 0.258292675 0.259262085 0.260183364 0.261069864 0.261886626 0.262637138 0.26336202 0.264040172 0.264668435 0.265267074 0.265859187 0.266436785 0.266989321 0.267507672 0.268033355 0.268574119 0.269102305 0.269623429 0.270171314 0.270722061 0.271273702 0.271820128 0.272345781 0.272851199 0.273359418 0.273855865 0.274332374 0.27481553 0.275283426 0.27574116 0.276196957 0.276661426 0.277144283 0.277662158 0.278231144 0.278853595 0.279543251 0.28031069 0.281175852 0.282138884 0.283165932 0.284281075 0.285444617 0.286649078 0.287882507 0.289126605 0.290371865 0.291617781 0.292858511 0.294094384 0.295314163 0.29647541 0.297597289 0.298705071 0.299755096 0.300739527 0.301674038 0.302558839 0.303380698 0.30412522 0.304808706 0.305426061 0.305953383 0.306367844 0.306677103 0.306864679 0.306931764 0.306850642 0.306640387 0.306324989 0.305896014 0.305358171 0.304743469 0.304097414 0.303437382 0.302822322 0.302269578 0.301797777 0.301395684 0.301042557 0.300734609 0.300454885 0.300159395 0.299834639 0.299457997 0.298999876 0.298462689 0.297844529 0.297123283 0.29635188 0.295543641 0.29470998 0.29388538 0.293058783 0.292246908 0.291451633 0.290639073 0.289840341 0.288990736 0.288055032 0.287065774 0.28608346 0.285175383 0.284348637 0.283683091 0.283211082 0.282911837 0.28279373 0.28281045 0.282924682 0.28310439 0.28326264 0.283345431 0.28333348 0.283189386 0.282946646 0.282633156 0.282258332 0.281852484 0.281408995 0.28090921 0.28038916 0.279889584 0.279384077 0.278939605 0.278566122 0.278247893 0.278009355 0.277801216 0.277644217 0.277514964 0.277401924 0.277312845 0.277262241 0.277252614 0.277288705 0.277347773 0.277489215 0.277689308 0.277892172 0.278120309 0.278400809 0.2787292 0.279053569 0.279393017 0.279714942 0.279981077 0.28023994 0.280501187 0.280746281 0.280981481 0.281229615 0.281505316 0.281819344 0.282106191 0.282410085 0.282806963 0.283225477 0.283667743 0.282994956 0.283461571 0.283975661 0.284526825 0.285056472 0.285509557 0.285886943 0.286135286 0.286260247 0.286215127 0.286014438 0.285613686 0.284971833 0.284091502 0.282956243 0.28150329 0.279703647 0.277550101 0.275018185 0.272077173 0.268716037 0.264874876 0.260514975 0.255669743 0.250310153 0.244345367 0.23776491 0.230693758 0.223221138 0.215381801 0.207286388 0.199132219 0.191086829 0.183358341 0.175952256 0.169080675 0.16287522 0.157427981 0.152673379 0.148578092 0.145180941 0.142378598 0.140140414 0.138356164 0.136978835 0.136003062 0.135413662 0.135148525 0.135153741 0.13538979 0.135846481 0.136501938 0.13733831 0.138311803 0.139418676 0.140638351 0.1419653 0.143352896 0.144817188 0.146343291 0.147889867 0.149449885 0.151025265 0.152602658 0.1541944 0.155822158 0.157425404 0.15902859 0.160654858 0.162315205 0.163981989 0.165622115 0.167270929 0.168943465 0.170642048 0.172316775 0.173929974 0.175548822 0.177156985 0.178709477 0.180220425 0.181699544 0.18309021 0.184395298 0.185622245 0.186800838 0.18787837 0.188820705 0.18964988 0.190393075 0.191028193 0.19151026 0.191856489 0.192054316 0.192100376 0.192010343 0.191775516 0.191426203 0.190961957 0.190365329 0.189642638 0.188820273 0.187937811 0.186994836 0.185983747 0.184911281 0.18383266 0.18271862 0.181536168 0.180333361 0.1792036 0.178104892 0.177043676 0.175949275 0.174927384 0.173996776 0.173069775 0.172143936 0.171244562 0.170410946 0.169637486 0.168926418 0.168241024 0.167623386 0.167096943 0.166631475 0.166206524 0.165830776 0.165489078 0.165183797 0.164883941 0.164615512 0.16439119 0.164208412 0.164040163 0.163911402 0.16386345 0.163870215 0.163952455 0.164086118 0.164257884 0.164493814 0.16475682 0.165032238 0.165332094 0.165674299 0.166024268 0.166376963 0.166724771 0.167097718 0.167470351 0.167848572 0.168252751 0.168671578 0.169150382 0.169680417 0.170200706 0.170739621 0.171328187 0.171916604 0.172487035 0.173077732 0.173677638 0.174287945 0.17488569 0.175448403 0.17600131 0.176561013 0.177102312 0.177634433 0.178159773 0.178714499 0.179268226 0.179769665 0.180300549 0.180882066 0.181373253 0.181835979 0.18234852 0.182855815 0.183333322 0.183782876 0.184234053 0.184690326 0.18510206 0.185481936 0.185860366 0.186205789 0.186502457 0.186762884 0.186936542 0.187037885 0.187010482 0.1868743 0.186623171 0.186210766 0.1856298 0.184860408 0.183934629 0.182868198 0.181649074 0.180227965 0.178670973 0.17700851 0.175226003 0.173327878 0.171414435 0.169534206 0.167649418 0.165778995 0.16400215 0.162285671 0.160639033 0.159061104 0.157538489 0.15613392 0.15480113 0.153572813 0.152491689 0.151557133 0.150787622 0.150193661 0.149785578 0.149594873 0.149575934 0.149679914 0.149784267 0.149791107 0.149787188 0.149701566 0.1494008 0.14897871 0.148393676 0.147664443 0.146876961 0.146019399 0.145138562 0.144272476 0.143397152 0.142595455 0.14194648 0.141401529 0.140955955 0.140633687 0.140388727 0.140141517 0.139814198 0.139485314 0.139186859 0.138850734 0.138522953 0.138247892 0.138016284 0.137789026 0.137528047 0.137336403 0.137218401 0.137138411 0.13697724 0.136891648 0.136967987 0.137083218 0.137164116 0.137294859 0.137409642 0.137466833 0.1374989 0.137516886 0.137482122 0.137412131 0.137325943 0.137260675 0.13721475 0.137154311 0.137111515 0.137012541 0.136937365 0.136914656 0.136850297 0.136787593 0.136735409 0.136595562 0.136403739 0.136256143 0.13609165 0.135893434 0.135532081 0.135074049 0.134660929 0.134166494 0.133511186 0.132862374 0.132152379 0.131399378 0.130596191 0.129685849 0.128845394 0.127991527 0.126942247 0.125935346 0.124992691 0.123990402 0.122845672 0.121640056 0.120698996 0.119752266 0.118535995 0.117309898 0.116317414 0.1153768 0.114252225 0.113111287 0.112154461 0.111141264 0.109958902 0.108867966 0.107982874 0.107030965 0.105955869 0.105006769 0.104269616 0.103607789 0.102871612 0.102137879 0.101547219 0.10094808 0.100333259 0.099921338 0.099744111 0.099311434 0.098911874 0.098981172 0.099099845 0.099083073 0.09885139
"19" 0.313002259 0.315887243 0.318827182 0.321685046 0.324570596 0.327449024 0.330337971 0.33323288 0.336170971 0.339147538 0.342035145 0.344905049 0.347789794 0.350735188 0.353676319 0.356475055 0.359219342 0.361904323 0.364688545 0.367509007 0.370462775 0.373336971 0.376213253 0.379109651 0.381980747 0.384719431 0.387477934 0.390323579 0.393109113 0.395900249 0.398625076 0.401345253 0.403985798 0.406612724 0.409248531 0.411790013 0.414220154 0.416791588 0.41926834 0.421749651 0.424208283 0.426542312 0.42879653 0.431077212 0.433348775 0.43554765 0.437664986 0.439859718 0.441877633 0.443943232 0.445863485 0.44779712 0.449608356 0.451391041 0.453149945 0.454746991 0.456194073 0.457538038 0.458881319 0.460191041 0.461534649 0.462910563 0.464234352 0.465547532 0.46676144 0.467986077 0.469216168 0.47056973 0.471917182 0.473318726 0.474722475 0.476097465 0.477516234 0.478594154 0.479797453 0.480761856 0.481967002 0.483137727 0.484322786 0.485496014 0.486630023 0.487742662 0.488690913 0.489597797 0.490281492 0.490905851 0.49124527 0.491472304 0.491524994 0.491530865 0.491436869 0.491218418 0.491006672 0.490709066 0.490370274 0.489995092 0.489689857 0.48940289 0.489129633 0.488776267 0.488622814 0.488659054 0.488652378 0.488901287 0.48930487 0.489733577 0.490452886 0.491004825 0.491556644 0.492232263 0.492860794 0.491763115 0.492630899 0.493441999 0.494256228 0.495055318 0.495926589 0.496882498 0.497889161 0.498732984 0.499707729 0.500676572 0.50162518 0.502603233 0.503574252 0.504553974 0.50551033 0.506478429 0.507407904 0.508349359 0.50934279 0.510323107 0.511265278 0.512199163 0.513149559 0.514062941 0.515017152 0.515976965 0.516952276 0.517950892 0.518885911 0.519839644 0.520764172 0.521662474 0.522580743 0.523500502 0.524421811 0.525236428 0.526056111 0.526865125 0.527597308 0.528259814 0.528917611 0.52958101 0.530102015 0.530520558 0.530960083 0.531351745 0.53165096 0.53191179 0.532102585 0.532213092 0.53222698 0.53216958 0.532020152 0.531786084 0.531405091 0.530855775 0.530192196 0.529390395 0.528430104 0.527240157 0.525857449 0.524275243 0.522408664 0.520365655 0.518109322 0.5155586 0.512800217 0.509863079 0.506725848 0.503432572 0.499985576 0.496398985 0.492795914 0.489126354 0.48548004 0.481963962 0.478644311 0.475494772 0.472512305 0.469756365 0.467265964 0.465020478 0.462969154 0.461031556 0.459190041 0.457427293 0.455752015 0.454064667 0.45238331 0.450762093 0.449201584 0.447735012 0.446365625 0.4451828 0.444166601 0.443295032 0.442572266 0.442028254 0.441646039 0.441399932 0.441307724 0.441381931 0.441638857 0.442052692 0.442640662 0.443432897 0.444439888 0.445616424 0.44693619 0.448370039 0.449845076 0.451342404 0.452853262 0.454319507 0.45574683 0.457146674 0.45851016 0.45980376 0.461041719 0.462165505 0.463199258 0.464157552 0.465019345 0.465788573 0.466505051 0.467179507 0.467767179 0.468290091 0.468751788 0.46915397 0.469496071 0.469833583 0.470182151 0.470542371 0.470942378 0.471410513 0.471910983 0.472483248 0.473091692 0.473729968 0.474408925 0.475080341 0.475669324 0.476186991 0.476636767 0.476985037 0.477220386 0.477305889 0.47725603 0.477063566 0.476708412 0.476189524 0.475491852 0.474637181 0.473548263 0.472265035 0.470821977 0.469184965 0.467323571 0.465258747 0.463003814 0.460566014 0.457918346 0.455111861 0.452217072 0.449196666 0.446047097 0.442792028 0.439484149 0.43607527 0.432652861 0.42925477 0.425906062 0.422632724 0.419446647 0.41632852 0.413283706 0.410318553 0.40744853 0.404697329 0.402080774 0.399639636 0.397374183 0.395204335 0.393067837 0.390900671 0.388620764 0.38608405 0.38317728 0.379883528 0.376200825 0.37203753 0.367390543 0.362338811 0.356896698 0.351019323 0.344801754 0.338305116 0.331595182 0.324728042 0.317749381 0.310781062 0.303935915 0.297270685 0.290852994 0.284781426 0.279113919 0.273881376 0.269054741 0.264667451 0.26075542 0.257310957 0.254244685 0.25155887 0.249283239 0.247371227 0.245733902 0.244370818 0.243269071 0.242372215 0.241639346 0.241050661 0.240571395 0.240186855 0.239858136 0.239561945 0.23930268 0.239040032 0.238773957 0.2385557 0.238404483 0.238324717 0.238325328 0.238431886 0.238631666 0.238930136 0.239336744 0.239823103 0.240371406 0.240978912 0.24164784 0.242364034 0.243111461 0.243892923 0.244714513 0.245568797 0.24645403 0.247351378 0.248262957 0.249191925 0.250151306 0.251120955 0.252072096 0.25302431 0.253995895 0.254953414 0.255877197 0.256759465 0.257609725 0.258403271 0.259139448 0.259838402 0.260487258 0.261087477 0.261654556 0.262196541 0.262711465 0.26321891 0.263715833 0.264227867 0.264731377 0.265215605 0.265709221 0.266216755 0.266729087 0.267249644 0.267760366 0.268232495 0.268684 0.269155622 0.269596666 0.270006239 0.270422578 0.270833641 0.271248251 0.271666139 0.272089779 0.272538126 0.273019314 0.273549438 0.27413252 0.27480185 0.275560826 0.276390612 0.277313232 0.27831316 0.279399335 0.280539155 0.281710207 0.282924145 0.284139335 0.28535226 0.286581963 0.287810713 0.289033562 0.290236056 0.291385144 0.292485088 0.293567836 0.294611484 0.295612246 0.296551049 0.297424734 0.298231184 0.298971593 0.299638271 0.300226599 0.300725847 0.301119953 0.301404297 0.301568002 0.301601589 0.301500112 0.301274836 0.300924987 0.300463021 0.299889058 0.299233407 0.29856202 0.297879517 0.29723087 0.296663851 0.296195149 0.295790762 0.295424759 0.295102954 0.29479754 0.294506699 0.294204414 0.29384461 0.293394893 0.292877167 0.292300135 0.291641533 0.290925771 0.290159196 0.289380491 0.28859058 0.287784427 0.28700465 0.286224514 0.285417467 0.284613311 0.283762187 0.28284806 0.281864405 0.280852109 0.279916704 0.279076368 0.278402388 0.27788046 0.277528882 0.277363062 0.277321726 0.277380198 0.277492225 0.277585834 0.277625889 0.277596951 0.277462661 0.277246743 0.276959866 0.276606739 0.276227266 0.275829256 0.27537182 0.274885774 0.274423689 0.27396211 0.273533076 0.273191512 0.272901922 0.27266103 0.272470981 0.272322655 0.272192389 0.272110701 0.272050858 0.272008479 0.271989375 0.272005498 0.272066444 0.272192627 0.272375554 0.272584796 0.272835314 0.273091793 0.273394018 0.27373156 0.274044037 0.274353445 0.27464518 0.274928063 0.275201529 0.275444061 0.275693834 0.275963217 0.276259482 0.276573479 0.276887953 0.277240187 0.277667433 0.278167486 0.278661847 0.277925998 0.278400451 0.278933525 0.279475659 0.279995143 0.280435681 0.280805111 0.281062394 0.281217366 0.281204909 0.281037152 0.280702561 0.28017208 0.279397815 0.278376102 0.277087808 0.275505126 0.273587555 0.271319181 0.268655688 0.265560687 0.261981279 0.257932365 0.253418446 0.248365834 0.24271667 0.236448631 0.229653016 0.2224309 0.21478793 0.206829578 0.198760703 0.1907233 0.182925835 0.175377339 0.168306455 0.161863714 0.156131983 0.151078522 0.146697357 0.143011868 0.139941394 0.137444451 0.135451496 0.133895203 0.13277103 0.132075399 0.131725997 0.131633669 0.131790832 0.132209346 0.132862568 0.133722514 0.134734675 0.135878205 0.137160972 0.138527334 0.139957011 0.141436338 0.142986953 0.144566029 0.146136925 0.147717297 0.149301976 0.150913715 0.15254277 0.154140979 0.155747041 0.15737924 0.159020692 0.160660982 0.16232273 0.163999617 0.165648073 0.167253301 0.168866888 0.170500919 0.17212005 0.173679054 0.175199017 0.176676065 0.178111032 0.179470986 0.180756956 0.181955487 0.183079615 0.184117705 0.185019121 0.185790464 0.186460733 0.187007457 0.187430039 0.18768549 0.18780005 0.187780499 0.187578604 0.187213823 0.186730519 0.186163306 0.185455844 0.184623346 0.183691815 0.182704195 0.181628838 0.180491835 0.179322287 0.178100318 0.176869407 0.17560108 0.174313784 0.173088148 0.171881944 0.170709923 0.169561893 0.168498099 0.167475015 0.166483507 0.165521145 0.164600819 0.163741827 0.162929818 0.16215691 0.161446974 0.160816312 0.160248339 0.159738526 0.159287438 0.158883661 0.158513024 0.158171773 0.157841876 0.157536164 0.157275245 0.157057106 0.156850979 0.156697199 0.156623483 0.156568825 0.156575516 0.156648323 0.15675278 0.156911328 0.157115087 0.157327667 0.157561421 0.157826945 0.158117071 0.158417478 0.158727676 0.159048647 0.159381226 0.159705848 0.16006206 0.160482854 0.160927176 0.161429211 0.161939442 0.162448511 0.163005337 0.163563073 0.164114609 0.164716318 0.165321931 0.165928885 0.166556627 0.167129189 0.16769217 0.168259069 0.168800533 0.169339448 0.169874683 0.17040883 0.170940042 0.171482608 0.172023088 0.172552839 0.173075095 0.173594639 0.174085975 0.17458725 0.175095394 0.175588071 0.176096305 0.176598728 0.177033663 0.177443549 0.177863032 0.178242534 0.178578317 0.178855762 0.179040149 0.179171085 0.179157615 0.179008737 0.178778514 0.178415224 0.177888274 0.177211359 0.176371291 0.175368384 0.174169093 0.172787353 0.171254873 0.169618502 0.167898834 0.166053802 0.164184079 0.162329391 0.16045478 0.158621401 0.156852469 0.155181572 0.153559342 0.151968241 0.150472715 0.149099246 0.147801742 0.146584779 0.145520717 0.144612134 0.143867195 0.14333047 0.143000454 0.14286311 0.142829672 0.14291589 0.143048719 0.14316152 0.143230706 0.143145636 0.142893091 0.142525271 0.142040059 0.141376212 0.140598744 0.139796227 0.138944775 0.13805142 0.137175098 0.136410207 0.135754421 0.135180473 0.134698614 0.134266213 0.133924633 0.133561403 0.133156419 0.132816598 0.132493883 0.132148966 0.131824672 0.131555885 0.13136591 0.131173104 0.13097319 0.130832568 0.130739838 0.130649164 0.130586743 0.130495042 0.130493686 0.13067016 0.130779371 0.130834669 0.130910888 0.130966038 0.130985931 0.13100569 0.131021664 0.131049693 0.131036267 0.130927309 0.130861372 0.130891755 0.130894542 0.130861625 0.130772159 0.130745977 0.130736038 0.130679891 0.130679548 0.130582795 0.130390689 0.130284116 0.13015826 0.129931435 0.129565865 0.129153088 0.128744811 0.128201395 0.12746875 0.126806885 0.126155078 0.12543115 0.12460319 0.12374638 0.122979268 0.122131251 0.121004723 0.119947992 0.119001538 0.118027277 0.116911836 0.115751825 0.114735574 0.113673978 0.112399384 0.111144364 0.110069633 0.108976476 0.107816644 0.106653057 0.105704755 0.104775578 0.103585079 0.102697395 0.101885185 0.1007521 0.099621415 0.098723374 0.097973414 0.097208202 0.096325621 0.095656782 0.095006712 0.094386473 0.093912892 0.09348958 0.093263827 0.093140423 0.092713997 0.092601068 0.092654519 0.092500992 0.092335343
"20" 0.282267094 0.284931839 0.287671119 0.290327728 0.293040216 0.29576768 0.298496529 0.301259547 0.304053843 0.306898087 0.30967778 0.312451541 0.315255955 0.318121046 0.320972979 0.32374537 0.32648249 0.329214871 0.331993401 0.334813818 0.337734237 0.340581536 0.343461722 0.346363544 0.349244609 0.352004766 0.354809493 0.357681319 0.360511586 0.363328323 0.366120517 0.368895933 0.371640459 0.374353066 0.377070487 0.379722267 0.38230446 0.384958148 0.38754873 0.390141025 0.392716691 0.395213827 0.397603795 0.400032297 0.402433604 0.40479672 0.407052264 0.409393847 0.411594525 0.413823649 0.415922672 0.418049291 0.420031965 0.422037601 0.424011812 0.425829157 0.427530497 0.429148868 0.430785954 0.432359546 0.433950737 0.435581341 0.437150404 0.438708976 0.440159827 0.441656917 0.443136439 0.444705352 0.44626005 0.447901785 0.449455947 0.451036632 0.452649102 0.454005808 0.455442652 0.456665367 0.45808813 0.45950529 0.460854873 0.462209493 0.46353747 0.464787439 0.465906352 0.466975808 0.46787481 0.46870251 0.46923174 0.469683856 0.469937131 0.470198229 0.470352188 0.470359579 0.470404223 0.470334902 0.470257789 0.470120296 0.470091403 0.469998822 0.469967768 0.469857156 0.469928771 0.470152631 0.47038275 0.470821559 0.471380889 0.471918792 0.472755671 0.473470822 0.474199772 0.475015908 0.475814357 0.474527553 0.475473419 0.476381689 0.47730723 0.47820963 0.479155064 0.480192199 0.481290981 0.48225075 0.483299345 0.484333456 0.485376909 0.486405641 0.487433836 0.488495365 0.489528626 0.490566239 0.491563216 0.492574587 0.493630111 0.494669646 0.49567306 0.4966681 0.497681767 0.498665363 0.499659911 0.500637561 0.501639202 0.502680689 0.50366044 0.504653379 0.505615622 0.506536752 0.507484794 0.508441553 0.509400904 0.510267243 0.511135876 0.511991754 0.51277484 0.513496801 0.514213845 0.514947057 0.515556216 0.516075134 0.516611725 0.517098129 0.517501831 0.517878413 0.518191606 0.518435329 0.518598318 0.518692285 0.518689901 0.518593788 0.518377692 0.518016577 0.517543554 0.516929507 0.516171366 0.515187055 0.514022589 0.512657166 0.511020035 0.509185061 0.507136866 0.504791081 0.502225861 0.499471277 0.496526167 0.493413448 0.490128621 0.486712426 0.483274996 0.479773507 0.476296067 0.47294341 0.469782844 0.466803685 0.46398297 0.46139513 0.459054366 0.456954882 0.455048561 0.453246459 0.451536834 0.449910656 0.448357344 0.446792215 0.445233881 0.443716452 0.442262188 0.440903172 0.439625636 0.438511997 0.437556431 0.436739415 0.436076075 0.435602441 0.435279399 0.43509236 0.435065836 0.435188457 0.43548955 0.435952961 0.436595678 0.437427402 0.438475579 0.439702034 0.441070288 0.442538187 0.444046587 0.445574626 0.447107598 0.448605224 0.450070634 0.451504543 0.452897042 0.454216108 0.455476463 0.456633613 0.457710847 0.458704799 0.459604412 0.460419297 0.461184189 0.461905479 0.46254006 0.463120133 0.463644788 0.46410574 0.464512959 0.464910835 0.46532625 0.465762854 0.466234863 0.466754407 0.467291296 0.467893362 0.468531162 0.469195262 0.469877362 0.470544025 0.471135497 0.471655086 0.472101256 0.472445995 0.47267355 0.472760245 0.472731099 0.472559705 0.4722372 0.471764252 0.471134216 0.470361322 0.469358414 0.468163446 0.466821894 0.465291128 0.463538274 0.461580291 0.459439144 0.457116589 0.454579458 0.451874197 0.449065581 0.446133777 0.443063498 0.439871863 0.436622605 0.433271319 0.429907575 0.426574066 0.423285872 0.420067176 0.416931719 0.413855225 0.410847515 0.407927886 0.40510264 0.402397573 0.399829447 0.397429332 0.395197839 0.39304997 0.390920281 0.388741642 0.386431053 0.38385126 0.380896091 0.377556756 0.373826683 0.369622558 0.36494492 0.359850481 0.354364693 0.34845385 0.34221901 0.335727215 0.329043403 0.322217807 0.315307632 0.30843468 0.30169943 0.295161173 0.288884863 0.282968491 0.277471036 0.272413284 0.267756298 0.263541847 0.259806514 0.256525189 0.253612414 0.251076892 0.248938419 0.247149594 0.245628864 0.244371697 0.243367381 0.242565379 0.241914444 0.241398372 0.240981929 0.240648545 0.240364678 0.240108468 0.239884816 0.239669546 0.239457056 0.239284374 0.239174604 0.23913262 0.2391738 0.239322893 0.239571117 0.239918761 0.240366824 0.240891337 0.241484269 0.242132351 0.242840447 0.243596449 0.244385883 0.245211251 0.246068828 0.246954136 0.247866794 0.248794734 0.249736272 0.250705071 0.251699328 0.252696931 0.253676131 0.254655227 0.25564526 0.256623045 0.257569641 0.258471414 0.259339795 0.260144949 0.260888293 0.261600211 0.262263715 0.262877956 0.263460815 0.264027864 0.264574125 0.265104115 0.265611753 0.266130611 0.266652748 0.267158955 0.267666325 0.268194035 0.268725574 0.269261673 0.269790247 0.270289138 0.270767599 0.27125752 0.271726266 0.272169307 0.272619054 0.273058534 0.273494706 0.273931548 0.274375603 0.274841204 0.275340736 0.275890291 0.276493058 0.277172551 0.277935758 0.278783232 0.279726058 0.280739546 0.281840205 0.282991886 0.284179643 0.285403326 0.28663297 0.287862062 0.289099872 0.290334612 0.291563973 0.292775109 0.293930277 0.295041189 0.296136454 0.29718329 0.298175886 0.299112543 0.299991786 0.300805941 0.301548406 0.302223489 0.30282633 0.303339615 0.303743899 0.3040407 0.30421634 0.304266676 0.304175377 0.303957611 0.303624988 0.303179517 0.302623615 0.301988438 0.301329717 0.30065845 0.300026596 0.299466714 0.298996463 0.298593223 0.298233658 0.297918782 0.297626212 0.297333047 0.297019526 0.296651304 0.296197385 0.295669928 0.295072332 0.294382408 0.293638825 0.292851418 0.292045236 0.29123798 0.290421605 0.289625779 0.288838074 0.28802827 0.287226826 0.286376461 0.285451546 0.284465089 0.283467785 0.282546043 0.281712502 0.28104274 0.280545771 0.28022036 0.280078396 0.280066088 0.28015244 0.280298308 0.280424237 0.28048566 0.280465215 0.280326024 0.280096695 0.279796511 0.279432535 0.279039875 0.278619125 0.278140515 0.277637467 0.277156636 0.276673093 0.27623634 0.275878817 0.275574908 0.275335193 0.275136098 0.274983436 0.274853677 0.274756312 0.274681851 0.27463536 0.274620995 0.274647102 0.274707109 0.274840921 0.275032431 0.275238484 0.275477812 0.275746301 0.276061609 0.276392564 0.276718527 0.277034193 0.277313128 0.277584001 0.277851358 0.278095171 0.278337657 0.278596416 0.278882399 0.279196411 0.279497072 0.279825136 0.280237198 0.280696481 0.281164795 0.280460477 0.280931011 0.281454593 0.282001242 0.282525808 0.282972619 0.283346027 0.28359884 0.283738807 0.283710018 0.283525795 0.283158123 0.282571957 0.281744659 0.280666173 0.279295549 0.277604386 0.275568828 0.273168683 0.27036643 0.267138362 0.263428077 0.25922367 0.254544094 0.249337994 0.243531018 0.23710677 0.230173387 0.222826019 0.215084866 0.207057983 0.198946461 0.190905064 0.183142088 0.175664797 0.168693565 0.162369467 0.156779982 0.15187595 0.147637725 0.144096404 0.141159996 0.138792433 0.13690383 0.135437019 0.134387046 0.13374453 0.133437261 0.133393705 0.133590311 0.134027913 0.134682253 0.135530412 0.136523239 0.137648441 0.138899662 0.140246317 0.141654953 0.143126763 0.144665122 0.146227948 0.147793405 0.149371281 0.150952317 0.152554058 0.154182464 0.155783191 0.157387815 0.159017049 0.160667948 0.162321486 0.163972422 0.165635273 0.167295769 0.168947674 0.170591831 0.172215447 0.173834436 0.175418019 0.176954247 0.178448245 0.179905288 0.181280598 0.182576127 0.183788866 0.184940226 0.185998037 0.186919913 0.187720172 0.188426904 0.189017825 0.18947015 0.189770989 0.189927183 0.189940438 0.189794473 0.189494669 0.189078361 0.188562632 0.187910587 0.187132992 0.186256044 0.185321003 0.184311837 0.183237791 0.182116784 0.180966489 0.179794014 0.178568624 0.177323572 0.176145874 0.174993418 0.1738768 0.172755584 0.171712741 0.170735896 0.169776641 0.168832541 0.167922691 0.167076387 0.166283652 0.165541664 0.164843999 0.164219849 0.163672641 0.163185 0.162746981 0.162357219 0.162001051 0.161677785 0.161362909 0.161075838 0.160833217 0.160632759 0.160445571 0.1603043 0.160243466 0.16021952 0.160263985 0.160367221 0.160505332 0.160702571 0.160935953 0.161179952 0.161446758 0.161750622 0.162070669 0.162397221 0.162726223 0.163073182 0.163425788 0.16377721 0.164157405 0.164577216 0.165038779 0.165554814 0.166070074 0.166594066 0.167166762 0.167739838 0.168300822 0.168897025 0.169499785 0.170108415 0.170721158 0.171288796 0.17184674 0.172410041 0.172951423 0.173486941 0.174017228 0.174561664 0.175104134 0.175626136 0.176161818 0.176717453 0.177224174 0.177715309 0.178217247 0.178721532 0.179214358 0.179685473 0.180165179 0.180644527 0.181067862 0.181462742 0.181861699 0.182224162 0.182540387 0.182809323 0.182988346 0.183104485 0.183084048 0.182941519 0.182700843 0.182312995 0.181759037 0.181035884 0.18015296 0.179118291 0.177909084 0.176507659 0.174962923 0.173313506 0.171562418 0.16969084 0.167799257 0.165931799 0.164052099 0.162200198 0.16042731 0.158733621 0.157099187 0.155514672 0.154005602 0.152616583 0.151301436 0.150078796 0.149006203 0.148084633 0.147327408 0.146762066 0.146393016 0.146228991 0.146202803 0.146297902 0.146416493 0.146476313 0.146508947 0.146423601 0.146146946 0.14575199 0.145216867 0.144520327 0.143737853 0.142907813 0.142041668 0.141161948 0.140286125 0.139502831 0.138850451 0.138291001 0.137827285 0.13744995 0.13715668 0.13685146 0.136485308 0.136150956 0.135840371 0.13549985 0.135173813 0.134901889 0.134691097 0.134481065 0.134250619 0.134084485 0.133979119 0.133893788 0.133781992 0.133693345 0.133730836 0.133876689 0.133971743 0.134064764 0.134160265 0.134216435 0.134242415 0.134261288 0.134251893 0.134230912 0.134181105 0.134093992 0.134038061 0.134023033 0.134003028 0.133937083 0.133854762 0.133830316 0.133793168 0.133733742 0.133707479 0.133589178 0.133397214 0.13327013 0.133124955 0.132912435 0.132548973 0.132113568 0.13170287 0.131183945 0.130489968 0.12983463 0.129153728 0.128415264 0.12759969 0.126716115 0.125912331 0.125061389 0.123973485 0.122941669 0.121997114 0.121008839 0.119878754 0.118695941 0.117717285 0.116713122 0.11546769 0.114227131 0.113193523 0.112176638 0.111034434 0.109882172 0.108929608 0.107958421 0.106771991 0.10578268 0.104934029 0.103891533 0.102788642 0.101865072 0.101121515 0.100407995 0.099598616 0.09889733 0.098276965 0.097667277 0.097123075 0.096705459 0.096503969 0.096225929 0.095812935 0.09579112 0.095877182 0.095792033 0.095593367
"21" 0.317891479 0.320778131 0.323690474 0.326494813 0.329236239 0.331956178 0.334733993 0.337566823 0.340544224 0.343515158 0.346353799 0.349127501 0.35202533 0.354965806 0.357784241 0.36036697 0.362552017 0.364434779 0.366569728 0.369311452 0.372449815 0.375279516 0.378316134 0.381380916 0.384242058 0.386896521 0.389753759 0.392757297 0.395764649 0.398700982 0.401461631 0.404154211 0.406782389 0.40932107 0.411703229 0.413970143 0.416000962 0.418466896 0.420979083 0.42359072 0.426151425 0.428306431 0.430213511 0.4322519 0.434431702 0.43666485 0.438761741 0.440860868 0.442789733 0.444648027 0.446468711 0.448243022 0.449909985 0.451587319 0.453168988 0.454501599 0.455403656 0.456090212 0.456652731 0.457314879 0.458432764 0.459770918 0.461015463 0.46222508 0.463203847 0.463993847 0.464971542 0.466279328 0.467678905 0.469204485 0.470633268 0.471963942 0.473020732 0.473362923 0.473435968 0.47321552 0.47332412 0.473841846 0.474697739 0.47582078 0.477066815 0.478323162 0.479300439 0.480030209 0.480670273 0.481305152 0.481795132 0.482194781 0.482360959 0.482614189 0.482756972 0.483042151 0.483302176 0.483388722 0.483337998 0.483236909 0.483245671 0.483067185 0.482807159 0.482655168 0.48260653 0.48285082 0.483085096 0.483525246 0.484066188 0.484513044 0.485238552 0.485714257 0.486235082 0.486824393 0.487502873 0.486462712 0.487214863 0.487980038 0.488742203 0.489464909 0.490220666 0.491092443 0.492028177 0.492841601 0.49372977 0.494609088 0.495491624 0.496381164 0.497235268 0.498055339 0.498946667 0.499829739 0.500733197 0.501583755 0.502491653 0.503361642 0.504279494 0.505137682 0.506006062 0.506868243 0.507742703 0.508598089 0.509454846 0.510358334 0.511214197 0.512031317 0.512807786 0.513574958 0.514367998 0.515167117 0.515979826 0.516723812 0.517417669 0.51806879 0.518663049 0.519180834 0.519676685 0.520176589 0.52053535 0.520794094 0.52101922 0.52118063 0.521274507 0.521322191 0.521269262 0.521107137 0.520873427 0.520498097 0.519972801 0.519262373 0.518359125 0.517271996 0.516096413 0.514821112 0.513513088 0.512103915 0.510605276 0.509004176 0.507211387 0.50529778 0.503206074 0.500834584 0.498296797 0.495590687 0.492661536 0.489524841 0.486219615 0.482830018 0.47946465 0.47608456 0.472788274 0.46966216 0.466725528 0.463955939 0.461318672 0.458880305 0.456675589 0.454675585 0.452813685 0.451031387 0.449321836 0.447654724 0.44605419 0.444429964 0.442778081 0.441194564 0.439698726 0.438322037 0.43702215 0.43589884 0.43494609 0.434105426 0.433388323 0.43286103 0.432475537 0.432213902 0.432116508 0.432160228 0.432385713 0.432793051 0.433372021 0.434139311 0.43512547 0.436282337 0.437562346 0.43894577 0.440390795 0.441829979 0.443269581 0.444700629 0.446087033 0.447428554 0.448724091 0.449940294 0.451096088 0.45217222 0.453170687 0.454067409 0.454864979 0.455571264 0.456215054 0.45678091 0.457256347 0.457669675 0.457992941 0.458248764 0.45847559 0.458730161 0.459016353 0.459372193 0.459814489 0.460322291 0.460847795 0.461432844 0.462053895 0.462713599 0.463384897 0.464020878 0.464586794 0.465083718 0.465484321 0.465757191 0.465885341 0.465844035 0.46567753 0.465346605 0.464843452 0.464182466 0.463346124 0.462376177 0.461175263 0.459787399 0.458271086 0.456585974 0.454676837 0.452542812 0.450220197 0.447698563 0.444979548 0.442140043 0.439237773 0.436255485 0.433141261 0.42989397 0.426554173 0.423054546 0.419490039 0.415949523 0.412462085 0.409092277 0.405872464 0.402754098 0.399745226 0.396848857 0.394061059 0.391418755 0.38892144 0.386582881 0.384414941 0.382352531 0.380313814 0.378241777 0.376049727 0.373594552 0.370779753 0.367604434 0.364043415 0.360023201 0.355531871 0.350628376 0.345341116 0.339636564 0.333582848 0.327254683 0.320708603 0.31398809 0.307150424 0.300312489 0.293592095 0.287041962 0.280718863 0.274733275 0.269146264 0.263982773 0.259217143 0.254887998 0.251034617 0.247619912 0.244587272 0.241940394 0.239673153 0.237760499 0.236135617 0.234779194 0.233687878 0.232818007 0.232115194 0.231556281 0.23110716 0.230750516 0.230454355 0.230208144 0.229988515 0.229762673 0.229531512 0.229310408 0.229128227 0.229015678 0.228992119 0.229088992 0.229304656 0.22963652 0.230059624 0.230563238 0.23115702 0.231797516 0.232488602 0.233250305 0.234063596 0.234920084 0.235805839 0.23670651 0.237628326 0.238561034 0.239497036 0.240456507 0.241444647 0.242433324 0.243411019 0.244398102 0.245392621 0.24637197 0.247317418 0.248219073 0.249096781 0.249932349 0.250687063 0.2513901 0.25205338 0.252678216 0.25325945 0.253825277 0.25437668 0.254902452 0.255401999 0.255910039 0.256430387 0.256934941 0.25743252 0.257948816 0.258459747 0.258962631 0.259471387 0.259948134 0.260389626 0.260837913 0.261272132 0.261675209 0.262067914 0.262460858 0.262847692 0.263249159 0.263680845 0.264133692 0.264619619 0.265158474 0.265753031 0.266426206 0.267169654 0.267994612 0.26891762 0.2699022 0.270969361 0.272090137 0.273239881 0.274428844 0.275624216 0.276830375 0.278049201 0.279265344 0.280477256 0.281685829 0.282834828 0.283939928 0.285028607 0.286052853 0.287037134 0.287959605 0.288823187 0.28962034 0.290337175 0.290979534 0.29154855 0.292026639 0.29238987 0.292660058 0.29281354 0.292836696 0.292713106 0.29246828 0.292109132 0.291631311 0.291060925 0.290413946 0.289726824 0.289045781 0.288405508 0.287839502 0.287361383 0.286945254 0.286581069 0.286263824 0.285983086 0.285687119 0.28536737 0.28499499 0.284569502 0.284071088 0.283481807 0.282824755 0.282110155 0.281346023 0.280566633 0.279781938 0.27899313 0.278197825 0.277401298 0.276592165 0.275781363 0.274938852 0.274024785 0.273033977 0.272043586 0.27112478 0.270285845 0.26960364 0.269082159 0.268723816 0.268556833 0.268491477 0.268507302 0.268615901 0.268720031 0.268756121 0.268704623 0.268569142 0.268359303 0.268088758 0.267756373 0.267414153 0.267046064 0.266602337 0.266139984 0.265689492 0.265230417 0.264790684 0.264432251 0.264139444 0.263888419 0.263671339 0.263513505 0.263353944 0.263210714 0.263102353 0.263038278 0.263024211 0.263037413 0.263062686 0.263141811 0.263268799 0.263432026 0.263594627 0.263756663 0.263990074 0.264243931 0.264484942 0.264743954 0.264970511 0.265200019 0.265452534 0.265651584 0.265859127 0.26609239 0.266357511 0.266698062 0.267006576 0.267320514 0.267734051 0.268202841 0.268700659 0.267965436 0.268448621 0.268965006 0.269489199 0.269999802 0.270446122 0.270819843 0.271087736 0.271232963 0.271215796 0.271049917 0.270716906 0.270168185 0.269380331 0.268375337 0.267103344 0.265541136 0.26363036 0.261375457 0.258716851 0.255659133 0.252129614 0.248114675 0.243624568 0.23862347 0.233017042 0.226817563 0.220108733 0.212967575 0.205403596 0.197542042 0.189543948 0.181621194 0.173937172 0.166518345 0.15955773 0.153222099 0.147594258 0.142640069 0.138351485 0.13472718 0.131715909 0.129264638 0.127309874 0.125797451 0.12469738 0.123989433 0.123606771 0.12352968 0.123712793 0.124105617 0.124730334 0.125529468 0.126514584 0.127644897 0.128921166 0.130258769 0.131671324 0.133138448 0.134664893 0.136216164 0.137778789 0.139352351 0.140933305 0.142540172 0.144174933 0.145810574 0.147457048 0.149130523 0.150799841 0.15247415 0.154147163 0.155820161 0.157481536 0.159149855 0.160798386 0.162403136 0.164012656 0.165584832 0.167073175 0.168500543 0.169882417 0.171163201 0.172337577 0.173426107 0.174462855 0.175431713 0.176305726 0.177058011 0.177720115 0.17827791 0.178694934 0.178977445 0.179117754 0.179131567 0.179003343 0.178735524 0.178337336 0.17783457 0.17719242 0.176404878 0.175506771 0.174531028 0.173450172 0.172295645 0.171131715 0.169912443 0.168650866 0.167376429 0.166068047 0.164819866 0.163604036 0.162441418 0.161273852 0.160178065 0.159152195 0.158190638 0.157258317 0.156342074 0.155481294 0.154706627 0.153982371 0.153290525 0.152682066 0.152147368 0.151675344 0.15124087 0.15083687 0.150461257 0.150118113 0.149799764 0.149509221 0.149261475 0.14905715 0.148844048 0.148676828 0.148609564 0.14857392 0.148577571 0.148669839 0.148793206 0.148935512 0.149124265 0.149339646 0.14957352 0.14983809 0.150126904 0.150421679 0.150724128 0.151048928 0.151391476 0.151720539 0.152073696 0.152492061 0.152970031 0.153453171 0.153945729 0.154489309 0.155052856 0.15559943 0.156135261 0.156718746 0.157324359 0.157912984 0.158503994 0.159081489 0.159643337 0.16020298 0.160760924 0.161321059 0.161881655 0.162440836 0.162993655 0.163522288 0.164055884 0.164618105 0.165142849 0.165647224 0.166163564 0.166724965 0.167248726 0.167723298 0.168230057 0.168734446 0.169180721 0.169617757 0.170037985 0.17042093 0.170787871 0.171063796 0.171251088 0.171362311 0.171366826 0.171263069 0.171034992 0.170648783 0.170117393 0.169414625 0.168572217 0.167580947 0.166438386 0.165099919 0.163619965 0.161996156 0.160279304 0.158489376 0.1566879 0.154922143 0.153149828 0.151393086 0.149698257 0.148097724 0.146551386 0.145053655 0.143606097 0.142243683 0.140981138 0.1397966 0.13876538 0.137913227 0.137201026 0.136635303 0.136317447 0.136198312 0.136171222 0.136255324 0.136358395 0.136438876 0.136490732 0.136435747 0.13621974 0.135881782 0.135375723 0.134732738 0.134020865 0.133263633 0.132480666 0.131628051 0.130748972 0.129988983 0.129337385 0.128736228 0.128186062 0.127747342 0.127378032 0.126998961 0.126606628 0.126256943 0.125932485 0.125593185 0.125278696 0.125019222 0.124833696 0.124636024 0.124444447 0.124302395 0.124178216 0.124110013 0.124039337 0.123981424 0.123999208 0.124098614 0.124182492 0.124236897 0.124349385 0.124374978 0.124360517 0.124344923 0.124292716 0.124273285 0.124260098 0.124199763 0.124155983 0.12415918 0.124160543 0.124088481 0.124023274 0.124031149 0.123989418 0.123989537 0.123976506 0.123945855 0.123836763 0.123670891 0.123458877 0.123212293 0.122902244 0.122579329 0.122157514 0.121533886 0.120774463 0.120089158 0.119489536 0.118745193 0.117943957 0.117168047 0.116367631 0.11559844 0.114602685 0.113482676 0.112508081 0.111510597 0.110376015 0.109222576 0.108153328 0.10713695 0.105907105 0.104645342 0.103661574 0.102591507 0.101432197 0.100327373 0.09937223 0.098453201 0.0973536 0.096444219 0.095504597 0.09444768 0.093408234 0.092461437 0.09176904 0.091090053 0.090231925 0.089508727 0.08897496 0.088375054 0.087825619 0.087504134 0.087258711 0.086887076 0.086545467 0.086647592 0.086720362 0.086538732 0.086449094
"22" 0.301887393 0.304650277 0.307441622 0.310175568 0.312907666 0.315648317 0.318407714 0.321180016 0.324072272 0.326926649 0.329728842 0.33251667 0.335332572 0.338224053 0.341067702 0.343753546 0.346297413 0.348712623 0.351270676 0.354032964 0.357002139 0.359809607 0.362748623 0.365614057 0.368423045 0.371096015 0.37388429 0.376748413 0.379573405 0.382372975 0.385062635 0.387735754 0.390379429 0.392967761 0.395479769 0.397913009 0.400199413 0.402733833 0.405186713 0.40768227 0.410158604 0.412461638 0.41455397 0.416744441 0.418988049 0.421167403 0.423248976 0.42539683 0.427392781 0.429356754 0.431215614 0.433089614 0.434845179 0.436587006 0.438284844 0.439812094 0.441081643 0.442257524 0.443378866 0.444471687 0.445759594 0.447123408 0.448415399 0.449694723 0.45084244 0.45192191 0.453086883 0.454425126 0.455751806 0.457183659 0.458542615 0.459904909 0.461180538 0.462027371 0.462858319 0.463430524 0.464235872 0.465269268 0.466299385 0.467441589 0.468644887 0.469714433 0.470678538 0.471475363 0.472181737 0.472750098 0.47317481 0.473481447 0.473498523 0.473652959 0.473641753 0.473640591 0.473575264 0.473461211 0.473207653 0.472956896 0.472875088 0.472590446 0.472445577 0.472159714 0.472108334 0.472193331 0.472351521 0.472698659 0.473163575 0.473529726 0.474245608 0.474737287 0.475216866 0.475958496 0.476691604 0.475536466 0.476371318 0.477161884 0.477983505 0.478756756 0.479576498 0.480494529 0.48149249 0.482318431 0.483191639 0.48409006 0.48506549 0.485969007 0.486891627 0.487785786 0.48870942 0.489647001 0.490546525 0.491356939 0.492279023 0.493219316 0.494159162 0.495002061 0.495938927 0.496884882 0.497737885 0.498620659 0.499528348 0.500482082 0.501382649 0.502253592 0.503091276 0.503911018 0.504745245 0.505583942 0.506417572 0.507182777 0.507914066 0.508626997 0.509276271 0.509881437 0.51048708 0.511044681 0.511493564 0.511856437 0.512193441 0.512482882 0.512702346 0.512888432 0.513003767 0.513050437 0.512985051 0.512830615 0.512588859 0.512209654 0.511702955 0.511050761 0.510277271 0.509376168 0.50836581 0.507204831 0.505895495 0.50440824 0.50269258 0.500819266 0.498757571 0.496403188 0.493849218 0.491121203 0.488196105 0.48509413 0.481825441 0.478449494 0.47504741 0.471601039 0.468224347 0.464975238 0.461903304 0.45899272 0.456239045 0.453701735 0.451397747 0.449320585 0.44741112 0.445593417 0.443852544 0.442180395 0.440590143 0.438991934 0.437381804 0.435832351 0.434366405 0.432996988 0.431687117 0.430544555 0.429579616 0.428757697 0.428067356 0.427574813 0.42722103 0.426995069 0.426937431 0.427035958 0.427314878 0.427759558 0.428371251 0.429177463 0.430196375 0.431366175 0.432684749 0.434109926 0.435562909 0.437039196 0.438509673 0.43994844 0.441342771 0.442701131 0.444043934 0.445295155 0.446476221 0.447581649 0.448587567 0.449491948 0.450314343 0.451061815 0.451749265 0.45237726 0.452919066 0.453400791 0.453813881 0.454175413 0.454490632 0.454805762 0.45514068 0.455503941 0.45593214 0.456420541 0.456911057 0.457459122 0.45805192 0.458666623 0.459298581 0.459932625 0.460492074 0.460971326 0.461366922 0.461665809 0.461827546 0.461852342 0.461756557 0.461494952 0.461076796 0.460513532 0.459783435 0.458922714 0.457845986 0.456579119 0.455177993 0.453583986 0.451783389 0.449786186 0.447627515 0.445284188 0.442710429 0.440015435 0.437219799 0.434301466 0.431274533 0.428109407 0.424882114 0.421543151 0.41817081 0.414813519 0.411513895 0.40831095 0.40519014 0.402128488 0.399150312 0.396272868 0.393507153 0.390856355 0.3883214 0.385942698 0.383734345 0.381609976 0.379497111 0.377345681 0.375052631 0.372498125 0.369577467 0.366284281 0.362616777 0.358482301 0.35388279 0.348874629 0.343470305 0.337651193 0.331512243 0.325102866 0.318485796 0.311705083 0.304819316 0.297948599 0.291214108 0.284661204 0.278352439 0.272391319 0.266845137 0.261729807 0.25700894 0.252717704 0.248905405 0.245546192 0.24256669 0.239967316 0.237758636 0.235901833 0.234327525 0.233014986 0.231958941 0.231115982 0.230426744 0.22988008 0.229451135 0.229108974 0.228808969 0.228545174 0.228314549 0.228087038 0.227870286 0.227683574 0.227549762 0.227497101 0.227528229 0.227663755 0.227899179 0.228246525 0.228698492 0.229219183 0.229809105 0.230455205 0.231160641 0.231927514 0.232742831 0.233574301 0.234432474 0.235316724 0.236224622 0.237139255 0.238068715 0.239026785 0.240008742 0.240999907 0.241972119 0.242951348 0.243938372 0.244904533 0.245846465 0.246738285 0.247594923 0.248408973 0.249150649 0.249848962 0.250507176 0.251110554 0.251685113 0.252256155 0.252803177 0.253330916 0.253836095 0.254345208 0.254861265 0.255356401 0.255852401 0.256366014 0.256878734 0.25739336 0.257899374 0.258385062 0.258855224 0.259322852 0.259765416 0.26018703 0.260612458 0.261032015 0.261446297 0.261865228 0.262298733 0.262758642 0.263246775 0.263792932 0.264402866 0.265072376 0.265815109 0.266639054 0.267550975 0.268525422 0.269583076 0.270696193 0.271837026 0.27300936 0.274191022 0.275376767 0.276570648 0.277765185 0.278942257 0.280102432 0.281216204 0.282301188 0.283366412 0.284374118 0.285342842 0.286247164 0.287089437 0.287876695 0.28858906 0.289225757 0.289790362 0.290273607 0.290655613 0.290924966 0.29105556 0.291058719 0.290923953 0.290660203 0.290299714 0.289825678 0.289233208 0.288562953 0.287863076 0.287161291 0.28650704 0.285928756 0.285427541 0.284987181 0.284620583 0.284308881 0.284045964 0.283766031 0.283456951 0.283112437 0.282692909 0.282190412 0.281602412 0.280923218 0.280195236 0.279437274 0.278655171 0.277865857 0.27708745 0.276317656 0.27554208 0.274753362 0.273958445 0.27310589 0.27217868 0.27118662 0.270190358 0.269266874 0.268429875 0.267757028 0.26725027 0.266903877 0.266739786 0.266718596 0.266787201 0.266906917 0.26701805 0.267054886 0.266997576 0.266835839 0.26661855 0.266343027 0.266003042 0.265627265 0.265229523 0.264790118 0.264335424 0.263890952 0.263446689 0.263032854 0.262674868 0.262388855 0.262154847 0.261961251 0.261813253 0.261661112 0.261550635 0.261468679 0.261434942 0.261416793 0.261437982 0.261513591 0.261608243 0.261747867 0.261964351 0.262194932 0.262408555 0.262696713 0.263005495 0.263301879 0.263595611 0.263851225 0.264092505 0.264356613 0.264608622 0.264844567 0.265099943 0.265360326 0.265666336 0.26597622 0.266299695 0.26671195 0.26720646 0.267722338 0.266966075 0.267455399 0.267955095 0.268486917 0.268990308 0.269435942 0.269804269 0.27004534 0.270163178 0.27014944 0.269982368 0.269629627 0.269067883 0.268237263 0.267181784 0.26586464 0.264226764 0.26221624 0.259854436 0.257080972 0.253890187 0.25022608 0.246066511 0.24142009 0.236257777 0.230494663 0.224134475 0.217261791 0.209972158 0.202269331 0.194259912 0.186171174 0.178188264 0.170451224 0.163012877 0.156068653 0.149765849 0.144191444 0.139291167 0.135094628 0.131598517 0.12869668 0.126351625 0.124464869 0.122991666 0.121925093 0.121279329 0.120971851 0.120946735 0.121155828 0.121597558 0.122259036 0.123105153 0.124101534 0.125222668 0.126476273 0.127833694 0.129252464 0.130715296 0.132215157 0.1337547 0.135305077 0.136869937 0.138450503 0.140047044 0.141661257 0.14325808 0.144867405 0.146495789 0.148138195 0.14977257 0.151409775 0.15306583 0.154716343 0.156356394 0.157981694 0.159597129 0.161223635 0.162795931 0.164313853 0.165772319 0.16719225 0.168535888 0.169809729 0.170979053 0.172079608 0.173115402 0.174037501 0.174823061 0.175516129 0.176098943 0.176530048 0.17680575 0.176957116 0.176976323 0.176841453 0.176558673 0.176149935 0.175629884 0.174982175 0.174199045 0.173308343 0.172361821 0.171355188 0.170282215 0.169160768 0.168008134 0.16682449 0.165613994 0.164388388 0.163206249 0.162047386 0.160926223 0.159819826 0.158779576 0.157802582 0.156872779 0.155957967 0.155062139 0.154233992 0.153472394 0.152749702 0.152069345 0.151471213 0.150927588 0.150433093 0.149990097 0.14959082 0.149226114 0.148895651 0.148567632 0.148253754 0.147997111 0.147786498 0.147584647 0.14744921 0.147380769 0.147328585 0.14733763 0.147408068 0.14750874 0.147668913 0.147841305 0.148011759 0.148219958 0.148475438 0.148749068 0.149024591 0.149302378 0.149613112 0.149937421 0.15027 0.150657296 0.15105249 0.151471257 0.151954487 0.152467847 0.152992025 0.153545097 0.154109672 0.154651836 0.155236781 0.155856311 0.156472072 0.157080591 0.157662556 0.158257663 0.158856153 0.159443751 0.160018891 0.160584822 0.161139011 0.161704227 0.162268296 0.162795663 0.163323164 0.163863182 0.164396942 0.164948404 0.165503755 0.166025639 0.16651085 0.166988865 0.167476371 0.167942598 0.168381363 0.168799147 0.169172585 0.169514403 0.169809982 0.17002134 0.170140117 0.170148566 0.170029938 0.16980496 0.169456705 0.168949604 0.168256819 0.167400971 0.166400045 0.165259033 0.163921818 0.162421912 0.160812169 0.159100056 0.15731141 0.155487254 0.153657794 0.151857391 0.150068656 0.148336172 0.146692395 0.145133227 0.143642932 0.142191768 0.140828341 0.139568776 0.138413027 0.137382001 0.136477754 0.135745391 0.135207042 0.134877235 0.134742141 0.134729967 0.134807348 0.134927794 0.13499853 0.135014132 0.134944558 0.134738311 0.134403154 0.133907974 0.133265316 0.132517383 0.131746605 0.130952835 0.130118176 0.129323989 0.128586456 0.127928913 0.12736316 0.12689583 0.126467377 0.126149938 0.125841424 0.125482023 0.125126377 0.124801412 0.12450128 0.124193661 0.12389344 0.123688966 0.123518653 0.123327099 0.123218931 0.123125926 0.123040676 0.122949243 0.122877479 0.122922622 0.123044692 0.123124145 0.123211823 0.123288482 0.123390704 0.123428106 0.123335809 0.123270519 0.123275682 0.123230465 0.123096056 0.123020053 0.122960366 0.122903079 0.122826792 0.122737184 0.12273448 0.122720547 0.122690313 0.122623004 0.122556314 0.122448631 0.122257844 0.122049801 0.121801727 0.121404752 0.120981172 0.120580077 0.120031729 0.119262628 0.118577152 0.117945507 0.117191859 0.116405331 0.115530871 0.114691667 0.113844991 0.112826183 0.111898564 0.110950179 0.109846093 0.108690657 0.10760387 0.106595531 0.105519198 0.104281217 0.103161938 0.102167584 0.101140276 0.100053728 0.09897507 0.097980261 0.096981905 0.09583845 0.094854586 0.093884826 0.092950612 0.092014194 0.091177851 0.090471454 0.089673795 0.088795096 0.088182613 0.087654732 0.087085001 0.086531803 0.086069696 0.085772328 0.085618936 0.0852938 0.084917389 0.084945515 0.084926032 0.084885038
"23" 0.299432427 0.30214411 0.304886132 0.307596594 0.310335875 0.313113362 0.315917283 0.318722606 0.321568966 0.324455827 0.327274144 0.330160469 0.332997471 0.335901439 0.338849217 0.341729343 0.344551176 0.347319901 0.350205421 0.353087276 0.356089592 0.358974457 0.361936539 0.364875942 0.36779201 0.370624721 0.373508036 0.376379997 0.379229695 0.38211453 0.384937286 0.38775748 0.390535802 0.393280327 0.395997286 0.398700148 0.401281565 0.403972656 0.406544268 0.40915668 0.411720216 0.414221525 0.416593581 0.419017613 0.421416342 0.423721522 0.426014334 0.428313375 0.430510849 0.432687968 0.434733897 0.436813891 0.438754708 0.4407368 0.442609608 0.444386899 0.446025193 0.447624683 0.44917661 0.450697392 0.452177376 0.453708351 0.45516485 0.456633151 0.458003789 0.459339082 0.460705519 0.462182283 0.463595033 0.465174735 0.466591239 0.468015105 0.469536871 0.47082147 0.472170204 0.473314196 0.474625796 0.475961089 0.477202296 0.478419721 0.479639053 0.480774879 0.481774539 0.482690632 0.483488262 0.484051675 0.484536052 0.484840065 0.484956324 0.48499918 0.485050321 0.48484987 0.484726042 0.484463334 0.484288722 0.484044194 0.483932018 0.483671814 0.483500481 0.483372867 0.483282626 0.483460397 0.483549118 0.483926654 0.484495401 0.484941959 0.485625446 0.486369759 0.487003952 0.487750083 0.488597393 0.487297893 0.488232613 0.489123255 0.490042418 0.490973234 0.49193725 0.492924869 0.494031101 0.495058358 0.496105134 0.497127205 0.498175621 0.499228418 0.500288367 0.501302063 0.50233835 0.503381491 0.504403353 0.505372405 0.506421566 0.507433653 0.508430004 0.509362221 0.510341763 0.511323988 0.512261868 0.513192058 0.514123023 0.515111625 0.516059697 0.516946256 0.517828345 0.518686235 0.51959002 0.520478129 0.521352947 0.522163153 0.522996187 0.523789704 0.524546206 0.525243044 0.525963306 0.526676118 0.527260184 0.527792037 0.528353691 0.528860092 0.529288888 0.529709578 0.530065894 0.530346513 0.5305776 0.530732155 0.530808747 0.530771613 0.530615985 0.5303514 0.529965043 0.529439509 0.528754711 0.527844846 0.526765585 0.525478423 0.523904562 0.522099018 0.520058393 0.51769793 0.515120447 0.512331843 0.509327054 0.506137133 0.502779126 0.499266803 0.495722234 0.492134482 0.488578409 0.485150158 0.481932342 0.478931665 0.476101458 0.473529637 0.471203566 0.469106168 0.467203081 0.465409845 0.463715851 0.462073535 0.460510194 0.458952248 0.457382053 0.455858171 0.454408526 0.453044504 0.451723486 0.450557828 0.449565768 0.448727995 0.448063135 0.447587043 0.447257161 0.447075129 0.447075903 0.447224766 0.447556674 0.448078275 0.448756784 0.449640334 0.450754821 0.452047318 0.453492314 0.45502919 0.456607342 0.45820722 0.459797233 0.461349249 0.462866575 0.464347392 0.465780795 0.467134535 0.468427598 0.469637573 0.470742911 0.471754849 0.472680032 0.473509341 0.474301934 0.475040168 0.475700557 0.476302356 0.476853251 0.477357775 0.477805734 0.478257269 0.478696257 0.479166597 0.479674786 0.480234742 0.480801821 0.481432855 0.482087493 0.482747853 0.483424604 0.484065473 0.484621823 0.48510766 0.485503107 0.485804319 0.48597905 0.486023426 0.485960662 0.48575601 0.485392511 0.484902889 0.484276652 0.483518839 0.482549965 0.481378824 0.480055243 0.478554726 0.47684592 0.47492975 0.472841978 0.470561773 0.468043387 0.465361416 0.462564945 0.459623486 0.456549376 0.453354657 0.450103968 0.446735531 0.44334653 0.440014094 0.436714649 0.433479458 0.430349469 0.427269429 0.424253792 0.421327084 0.418498099 0.415791631 0.413218796 0.410795391 0.408518791 0.406326294 0.404152781 0.401915252 0.399526805 0.396869123 0.393830717 0.390409559 0.386598736 0.382296562 0.377532333 0.372365266 0.366808593 0.360852629 0.354586273 0.348078728 0.341404349 0.334618956 0.327765942 0.320951194 0.314291894 0.307856351 0.301694363 0.295898497 0.290538222 0.285618693 0.281104684 0.277041167 0.273452729 0.270303041 0.267543435 0.265151858 0.263134509 0.261464387 0.260070741 0.258922398 0.258009225 0.257287145 0.256696045 0.256236851 0.255889118 0.255612522 0.255361766 0.255136341 0.254941881 0.254770041 0.254606903 0.254475802 0.254398882 0.254399031 0.254479617 0.254673839 0.254973829 0.25538215 0.255889833 0.256470293 0.25712648 0.257826895 0.258588552 0.259407878 0.260257989 0.261144996 0.262056887 0.262993664 0.263947874 0.264932573 0.265930623 0.26694414 0.267992258 0.269036561 0.270045489 0.271059483 0.272072226 0.273060709 0.274027407 0.274951667 0.275833398 0.276656479 0.277411819 0.278132081 0.278812349 0.279442012 0.280043662 0.280634344 0.281192362 0.28173551 0.282261491 0.282786787 0.283317387 0.283824086 0.284336716 0.284877747 0.285420567 0.28597191 0.286506951 0.28700459 0.287495703 0.288007349 0.288502008 0.288969815 0.289438993 0.289891273 0.290345192 0.290799439 0.29127264 0.291750789 0.292254806 0.292833447 0.29347074 0.294173926 0.294950783 0.295798093 0.296745509 0.297771782 0.298875064 0.300032079 0.301227629 0.302452683 0.303687871 0.304926425 0.306174517 0.30742684 0.308656722 0.309873074 0.311032355 0.312155038 0.313268751 0.314306289 0.315295666 0.316232145 0.317103267 0.317905307 0.318641186 0.319312036 0.319914997 0.320421219 0.320809543 0.3211025 0.321269393 0.321313411 0.321222663 0.321014822 0.320697635 0.320249885 0.319690675 0.319039613 0.318349332 0.317646682 0.31699127 0.31642282 0.315945625 0.315547079 0.315183133 0.314869761 0.314610362 0.31432718 0.314028174 0.313679516 0.31322813 0.312694132 0.312068433 0.311361223 0.310591102 0.309768885 0.308938324 0.308114022 0.307289571 0.306482017 0.305683434 0.30487144 0.304061353 0.303203732 0.302256733 0.301258147 0.300273567 0.299357653 0.298547804 0.297899127 0.297427446 0.297134727 0.297034174 0.297071129 0.29718703 0.297377229 0.297552586 0.297634661 0.297628105 0.297483176 0.297237694 0.296922207 0.296516865 0.296077013 0.295636594 0.295140117 0.294586509 0.294059336 0.293562114 0.293111324 0.292719007 0.292396277 0.292150587 0.291956723 0.29182142 0.291680843 0.291558385 0.291494846 0.291471928 0.291486263 0.291515172 0.291585803 0.291738927 0.291921586 0.292146266 0.292408288 0.292674214 0.293005764 0.293352664 0.293676883 0.293988466 0.294265568 0.294548512 0.294844747 0.295123607 0.295375824 0.295627028 0.295936555 0.296295375 0.296622306 0.296959102 0.297362477 0.297836453 0.298369616 0.297609687 0.298093468 0.298605859 0.299130321 0.299632668 0.300048351 0.300391763 0.300606698 0.300724387 0.300659359 0.300416172 0.299992621 0.299355865 0.298447698 0.297296405 0.295848399 0.294066191 0.291947991 0.289475441 0.286579609 0.283248901 0.279426932 0.275082886 0.270248443 0.264885306 0.25888899 0.252250552 0.245108619 0.237559661 0.229600981 0.221357018 0.213015586 0.204792172 0.196830794 0.189176202 0.182045206 0.17558676 0.169891864 0.164904356 0.160613865 0.157019466 0.15405345 0.15166302 0.149761379 0.148291305 0.147251695 0.14661786 0.146320999 0.14632307 0.146596625 0.147092432 0.147833243 0.148766011 0.149823576 0.151027769 0.152364343 0.153817281 0.15533188 0.156882495 0.158487409 0.160158172 0.161830157 0.163501665 0.165167689 0.16684033 0.168542325 0.170252874 0.171943858 0.17365779 0.175383911 0.177129835 0.178867206 0.180601478 0.1823304 0.184072405 0.185791478 0.187489942 0.189172372 0.190814897 0.19242546 0.193995938 0.195513651 0.196959123 0.198320761 0.199594796 0.200788543 0.2018978 0.202917412 0.203814939 0.204590559 0.205265164 0.205794513 0.206164703 0.206383675 0.206450462 0.206379727 0.206151336 0.205783978 0.205283329 0.204654813 0.203918666 0.203100845 0.20218657 0.201209366 0.200190663 0.199106842 0.197962731 0.196791753 0.195599556 0.194392189 0.193205059 0.192052603 0.190940827 0.189851284 0.188796446 0.187791318 0.186826691 0.185873449 0.184953809 0.18408756 0.183268771 0.182523102 0.181815162 0.181180879 0.180612728 0.180099517 0.179671615 0.179286808 0.178932324 0.178596228 0.178273603 0.177965999 0.177725762 0.177538157 0.177371114 0.177248597 0.177179843 0.177158266 0.177225724 0.177381754 0.177547425 0.177777156 0.178058282 0.178319409 0.178615779 0.178945616 0.179268882 0.179599583 0.179940417 0.180317938 0.180696934 0.181070715 0.181492582 0.18193838 0.182430699 0.182976589 0.183525339 0.184092134 0.18466574 0.185229912 0.185804933 0.186398774 0.18701759 0.187662691 0.188285574 0.188879803 0.189468712 0.190029964 0.190589681 0.191155449 0.191733673 0.192297444 0.192848653 0.193364352 0.19386296 0.194398195 0.194943026 0.195457488 0.195947722 0.196447372 0.196941093 0.197402701 0.197864816 0.198317483 0.198749334 0.199137568 0.199519515 0.199900374 0.200208113 0.200455919 0.200619549 0.20071198 0.200688183 0.20051837 0.200240254 0.199811563 0.199205518 0.198415145 0.197465107 0.19636555 0.195110068 0.193651348 0.192018926 0.190246418 0.188393742 0.186466768 0.184493065 0.182511091 0.180494577 0.178472996 0.176562399 0.174773976 0.173056334 0.171427771 0.169798136 0.168250889 0.166848451 0.16555886 0.164429724 0.163478732 0.162682399 0.162085906 0.161735073 0.161568582 0.161515906 0.161559269 0.161672711 0.161797851 0.161830083 0.161706105 0.161414504 0.160960421 0.160384968 0.15964973 0.158821747 0.157945782 0.157018051 0.156054825 0.155098215 0.154292181 0.15365541 0.153136224 0.152698666 0.152352318 0.152078867 0.151762292 0.151371732 0.150994897 0.150662109 0.150316149 0.149966806 0.149642125 0.149407998 0.149164185 0.148918912 0.148731291 0.148562208 0.148448631 0.148379773 0.148319378 0.148323372 0.14845486 0.148602933 0.148725331 0.148853227 0.148917168 0.14896524 0.148995325 0.148962796 0.148892492 0.1487858 0.148686469 0.14861621 0.14852944 0.148425341 0.148287177 0.148197249 0.148222983 0.148156956 0.148015544 0.148038074 0.148007423 0.147829741 0.1476724 0.147488549 0.147240147 0.146872103 0.146411076 0.145944089 0.145335987 0.144575313 0.143895924 0.143160298 0.142372504 0.141533017 0.140647858 0.139789298 0.138768569 0.137655601 0.136600986 0.135560066 0.13445954 0.133217484 0.132026553 0.131008759 0.130002052 0.12877062 0.127490476 0.126430333 0.125336245 0.124029249 0.122919388 0.121840246 0.120730378 0.119551837 0.118505925 0.117439866 0.116344407 0.115215041 0.114151083 0.113345392 0.11254786 0.111672662 0.110832542 0.11021886 0.109605886 0.108698502 0.108287446 0.108199604 0.107736446 0.107498035 0.107478194 0.107439645 0.107294992 0.107306167
"24" 0.278149784 0.280535072 0.283023268 0.285485357 0.287968785 0.290497899 0.293020725 0.295564175 0.298154145 0.300791949 0.303378224 0.305986434 0.308559388 0.311256379 0.313958675 0.316582024 0.319177955 0.321750015 0.324401349 0.327078402 0.329847813 0.33254984 0.335297614 0.338020891 0.340761244 0.343388587 0.346050173 0.348803461 0.351475477 0.354179144 0.356833696 0.359511882 0.362138748 0.364742249 0.367340147 0.369919837 0.372411817 0.374964982 0.3774333 0.37994051 0.382409483 0.384826601 0.387134552 0.389497787 0.391829431 0.394073188 0.396281809 0.398565143 0.400741786 0.402867705 0.404920757 0.407000542 0.408948123 0.41093874 0.412812084 0.41463989 0.41635412 0.417982578 0.419628769 0.421181083 0.422766775 0.424420476 0.425935 0.42750451 0.428945214 0.430460006 0.431902081 0.433440566 0.434959233 0.436578214 0.43807295 0.439559579 0.44117856 0.442520678 0.443962961 0.445191622 0.446590722 0.447950184 0.449264586 0.450565577 0.451824278 0.453072906 0.454198658 0.455198884 0.456103444 0.456864506 0.457432419 0.457961321 0.458153725 0.458496422 0.458659768 0.458761841 0.458835691 0.458848894 0.458911687 0.45884338 0.45891425 0.458946049 0.45898959 0.458937168 0.459114581 0.459438592 0.459656537 0.460174561 0.460794359 0.461400539 0.462118566 0.462874413 0.463610053 0.464464039 0.465315729 0.463983536 0.464922816 0.465853155 0.466799915 0.467701554 0.468597442 0.469571918 0.470662802 0.471599579 0.472600013 0.473589182 0.474620998 0.475641549 0.476640731 0.477657586 0.47865501 0.479678094 0.480677396 0.481619716 0.482593685 0.483566314 0.484527498 0.485428303 0.486377925 0.487279922 0.488158315 0.489046156 0.489935875 0.490850598 0.491704702 0.492551863 0.493382722 0.494186759 0.494995177 0.495817244 0.496694207 0.497490913 0.498245418 0.499005705 0.499743044 0.50044477 0.501112819 0.501809001 0.502424061 0.502952754 0.50350219 0.504024923 0.504500747 0.504941702 0.505341411 0.505673051 0.505942047 0.506121218 0.506231546 0.506265044 0.506203413 0.506010532 0.505724311 0.505289435 0.504728138 0.503956199 0.502996266 0.501850307 0.50044781 0.498855263 0.497031808 0.494914949 0.492595464 0.490092903 0.487372458 0.484502017 0.481491476 0.478361398 0.475211978 0.472010732 0.468860328 0.465824246 0.462980598 0.460305959 0.457774043 0.455478221 0.453404695 0.451531321 0.449837685 0.448251039 0.446745962 0.4453125 0.443954259 0.442566007 0.441166013 0.439816803 0.438532561 0.437323004 0.436174959 0.435157806 0.434282362 0.433553189 0.432976902 0.432578474 0.432310522 0.432158381 0.432161748 0.432300657 0.432597071 0.433049202 0.433652461 0.434451312 0.435463041 0.436620414 0.437900484 0.43927896 0.440708101 0.442164451 0.443614244 0.445017189 0.446382642 0.447709233 0.449007273 0.450232178 0.451388836 0.452452332 0.45345068 0.454383433 0.455239922 0.456009656 0.45672527 0.457389623 0.457984269 0.458534688 0.459035993 0.459484965 0.459896773 0.46031183 0.460730612 0.461147964 0.461616039 0.462124795 0.462638229 0.463187873 0.463763535 0.464357167 0.464951634 0.465524793 0.466014057 0.466410905 0.466729194 0.466950655 0.467064083 0.467066497 0.466975957 0.466756076 0.466423452 0.465999216 0.465456784 0.464816064 0.463980198 0.462979853 0.46186316 0.460601836 0.459165156 0.457527637 0.455720901 0.453759462 0.451595455 0.44926405 0.44681865 0.444239914 0.441524833 0.438694298 0.435814857 0.432840079 0.429825306 0.426828831 0.423864752 0.420969218 0.418139279 0.415338576 0.41260159 0.409949303 0.407381475 0.404916465 0.402571231 0.400382042 0.398314357 0.396314502 0.394325614 0.392293096 0.390125692 0.387691349 0.38491708 0.381802201 0.378310233 0.374393612 0.370059282 0.365338027 0.36026144 0.354814142 0.349077135 0.343108445 0.336975902 0.330716044 0.324379206 0.318077892 0.311906278 0.305925131 0.300195873 0.294787526 0.289771438 0.285167396 0.280949086 0.277141273 0.273775071 0.270827115 0.268233329 0.265985429 0.264090508 0.262516737 0.26119858 0.260132939 0.259289443 0.258615375 0.258079618 0.257661581 0.257338673 0.257082373 0.256852746 0.25665459 0.256488562 0.25631997 0.256161034 0.256034881 0.255961746 0.255970299 0.256064385 0.256257474 0.256542534 0.256927639 0.257392049 0.257926196 0.258538961 0.259196818 0.259912372 0.260678321 0.261464655 0.262288541 0.263154298 0.264037997 0.264943391 0.265862912 0.266791552 0.26774773 0.268740088 0.269723475 0.270677269 0.271646112 0.272609532 0.27355659 0.274483502 0.275362968 0.276207656 0.276996374 0.27771464 0.278402478 0.27905792 0.279659748 0.28022778 0.280779153 0.281307101 0.281831592 0.282332242 0.282837808 0.283357114 0.283850551 0.284340471 0.284851879 0.285363436 0.285871625 0.286373228 0.286849976 0.28731057 0.287797302 0.288264245 0.288698196 0.289139658 0.289574593 0.290007532 0.29044345 0.2908988 0.291378409 0.29188484 0.292431891 0.293035179 0.293707579 0.294438362 0.295242161 0.296149582 0.297118038 0.298158437 0.29925558 0.30038622 0.301559716 0.3027246 0.303884029 0.305046588 0.306200266 0.307357132 0.308497518 0.30958119 0.310614288 0.311648846 0.312626094 0.313546211 0.314424872 0.315236926 0.315988481 0.316675961 0.317292452 0.317854732 0.318327338 0.318691492 0.318980396 0.31915614 0.319204241 0.319120407 0.318924606 0.31861949 0.318196923 0.317673564 0.317076117 0.316434801 0.315782964 0.315163046 0.314602256 0.31412974 0.313711584 0.313329846 0.312997341 0.312722057 0.312440813 0.312121958 0.311751246 0.3112939 0.310758173 0.31013608 0.309413999 0.30864197 0.307837486 0.307013839 0.306191385 0.305391699 0.304618478 0.303835511 0.303049684 0.302289128 0.301477551 0.300572693 0.299620807 0.298681766 0.297814012 0.297035903 0.296421885 0.295972854 0.295679986 0.295569152 0.295606941 0.295739233 0.295933753 0.296131432 0.296247631 0.296252578 0.296129882 0.295909524 0.295614719 0.295244783 0.294833094 0.29440707 0.293922484 0.293401599 0.292928994 0.292462111 0.292033941 0.291690975 0.291423202 0.29121092 0.291048825 0.290919989 0.290796697 0.290708184 0.290634632 0.290596098 0.290601641 0.290629089 0.290664256 0.290800542 0.290976584 0.291176379 0.291409522 0.291647822 0.291949242 0.292260438 0.29257068 0.292882949 0.293168992 0.293435484 0.293711394 0.293966919 0.294202924 0.294454247 0.294742823 0.295086175 0.2953825 0.295696735 0.296094775 0.296562612 0.297058821 0.296350271 0.296794832 0.297255248 0.29775697 0.298262 0.298677087 0.299009323 0.299209982 0.299281776 0.299244046 0.29906261 0.298715711 0.29813239 0.297286719 0.296208203 0.294836074 0.293166578 0.291168958 0.288817555 0.286072463 0.282956123 0.279374003 0.27527979 0.270691544 0.265588492 0.259868532 0.253531516 0.246692628 0.239416182 0.231733233 0.223741114 0.215639785 0.207609564 0.199830398 0.192338705 0.185334682 0.178989336 0.173356563 0.168396682 0.164138094 0.160582453 0.157633677 0.155267537 0.153407693 0.15197356 0.150968313 0.150377899 0.15013732 0.150168926 0.150461867 0.151012748 0.151794672 0.152751163 0.153838843 0.155072197 0.156447142 0.157926217 0.159449577 0.161023602 0.162664905 0.164335251 0.166003451 0.167671487 0.169339657 0.171056241 0.172785237 0.174506083 0.176216915 0.177960515 0.179675102 0.181404248 0.183123872 0.184855655 0.186592594 0.188307077 0.190003559 0.191678315 0.193351328 0.19499658 0.19658497 0.198126286 0.199624598 0.201053426 0.202390507 0.203613088 0.204763815 0.205860764 0.206846163 0.207706943 0.208467573 0.209108084 0.209611982 0.209964678 0.210163325 0.210222706 0.210136905 0.209896073 0.209527522 0.209049165 0.208440721 0.207692459 0.206856981 0.205953255 0.204979032 0.203926295 0.202804804 0.201653779 0.200479016 0.199281216 0.198077038 0.196918517 0.195779189 0.194668055 0.193558738 0.192508876 0.191511661 0.190524593 0.189551726 0.188635349 0.187787771 0.186993212 0.186261952 0.185575292 0.184969664 0.18444109 0.183969066 0.183554158 0.183171123 0.182828709 0.182517812 0.182220221 0.181938455 0.181713238 0.181513175 0.181344211 0.181231409 0.181209981 0.181239232 0.181323767 0.181489393 0.181685746 0.181919128 0.182201892 0.182518378 0.182857156 0.18320249 0.183588594 0.18397972 0.184383959 0.18476674 0.18516475 0.18556273 0.185983151 0.186462462 0.186982587 0.187507629 0.188042387 0.188613057 0.189224258 0.189813226 0.190339372 0.190925628 0.191553667 0.192151025 0.192738444 0.193325996 0.193917364 0.194473863 0.194993272 0.195506126 0.196020082 0.19654882 0.197091475 0.197621837 0.198159024 0.198700726 0.199185595 0.199679166 0.200178131 0.200647071 0.201101288 0.201537728 0.20199506 0.202474147 0.202915072 0.203321978 0.203710988 0.204044268 0.20436044 0.204618886 0.204778999 0.204885885 0.204868957 0.204708159 0.204446405 0.204053268 0.203466937 0.202683568 0.201740265 0.200646833 0.19938767 0.197950646 0.196375027 0.194640398 0.192776263 0.190840811 0.188871592 0.186887205 0.184887052 0.182871237 0.18093209 0.179104716 0.177316561 0.175643012 0.174027413 0.172462448 0.170997709 0.169672087 0.168483824 0.167474583 0.166659355 0.166052967 0.165700763 0.165542066 0.165513039 0.16562058 0.165775552 0.165839091 0.165839106 0.165708899 0.165372148 0.164900571 0.164306 0.163583383 0.162810355 0.161979169 0.161044255 0.160037041 0.159070492 0.158258557 0.157606497 0.157030687 0.156563878 0.156216651 0.155946583 0.155685067 0.155350745 0.154997706 0.154671758 0.154316351 0.153958276 0.153631821 0.153368488 0.153117925 0.152877554 0.152688056 0.152530372 0.152420789 0.152359366 0.152334496 0.152411476 0.152560368 0.152681336 0.152833402 0.152981758 0.153032005 0.153040782 0.152978405 0.152930886 0.152956769 0.152920872 0.152770936 0.152629301 0.152533174 0.152472466 0.152360067 0.152211636 0.152143151 0.152071312 0.152089119 0.152053013 0.151985601 0.15183416 0.151643991 0.151471615 0.151312605 0.150971055 0.150437534 0.149896532 0.149292573 0.148507968 0.147823587 0.147256121 0.146442309 0.145452097 0.144505441 0.143612549 0.14257434 0.141381606 0.140247554 0.139212072 0.138138235 0.136918932 0.135617867 0.134550929 0.133465856 0.13206692 0.130747974 0.129731119 0.12864998 0.127391383 0.126190349 0.124998726 0.123694226 0.122390375 0.121285126 0.120247431 0.119123735 0.117975831 0.116830036 0.115888864 0.115163855 0.11421369 0.113355473 0.112817548 0.112187676 0.111424163 0.110821217 0.110621013 0.110456392 0.109958492 0.109738752 0.109723449 0.109677725 0.109675616
"25" 0.288791105 0.291339591 0.2939547 0.296540976 0.29915233 0.30180563 0.304469004 0.30714339 0.309861556 0.312623888 0.315326184 0.318073452 0.32077843 0.323578909 0.326403946 0.329155684 0.331864566 0.334534958 0.337303385 0.340082839 0.342968702 0.345762148 0.348617077 0.351448417 0.354276627 0.357006654 0.359779105 0.362591729 0.365352586 0.368146837 0.370885491 0.373634681 0.376337275 0.379011288 0.381668717 0.384309992 0.386846691 0.389468819 0.391988784 0.394548595 0.39706485 0.399524063 0.401864067 0.4042577 0.406622887 0.408897355 0.411148071 0.413439259 0.415626317 0.417777836 0.419827327 0.421907216 0.423851416 0.42583777 0.427710846 0.429513395 0.431189656 0.432803631 0.434402689 0.435939237 0.437472075 0.439064413 0.440549925 0.44206883 0.443474501 0.444899544 0.4463038 0.447811425 0.449277133 0.450876474 0.452332094 0.453787342 0.455357715 0.456671074 0.458066583 0.459252909 0.460608259 0.461955637 0.463233441 0.464492649 0.465731665 0.466923892 0.467986599 0.468944758 0.469795853 0.47045809 0.470984235 0.471400693 0.471555024 0.471747801 0.471855044 0.471805856 0.471780866 0.471656114 0.471600205 0.471443787 0.471423134 0.471308932 0.471245036 0.471155018 0.471198604 0.471449494 0.471602827 0.472050607 0.47264488 0.473171249 0.473872006 0.474622086 0.475307003 0.476107061 0.476956561 0.475640714 0.476577714 0.477488205 0.478421167 0.479337394 0.480267346 0.481248394 0.482346952 0.483328968 0.484352574 0.485358194 0.486398309 0.487434983 0.488464549 0.489479825 0.49049668 0.491529793 0.492540374 0.49349606 0.494507626 0.495499983 0.496478751 0.497395262 0.498359844 0.499301955 0.500210091 0.501119107 0.502029449 0.502981111 0.5038822 0.50474906 0.505605534 0.506436497 0.507292598 0.508147687 0.509023577 0.509827033 0.510620803 0.511397704 0.512144625 0.512843907 0.513538063 0.51424256 0.514842123 0.515372396 0.515927941 0.516442508 0.516894817 0.51732564 0.517703652 0.518009782 0.518259823 0.518426687 0.518520147 0.518518329 0.518409699 0.518180966 0.517844677 0.517364472 0.516741425 0.515900522 0.514880925 0.513664365 0.512176186 0.510477141 0.508545101 0.50630644 0.503857955 0.501212373 0.498349756 0.495319575 0.492135301 0.488814101 0.485467106 0.482072607 0.478719369 0.475487202 0.47245647 0.469618812 0.466937751 0.464503929 0.46230413 0.460318744 0.458520383 0.456830442 0.455230907 0.453693017 0.452232227 0.450759128 0.449274033 0.447837487 0.446470544 0.445183754 0.443949223 0.442857817 0.441924065 0.441140592 0.440520018 0.440082759 0.439783841 0.439616755 0.439618826 0.439762712 0.440076873 0.440563738 0.441204622 0.442045823 0.443108931 0.444333866 0.445696399 0.447154075 0.448657721 0.450185835 0.451705739 0.453183219 0.454624608 0.456028312 0.457394034 0.458683357 0.459908217 0.461044952 0.462096795 0.463069141 0.463959977 0.464759499 0.465513602 0.466214895 0.466842413 0.467418522 0.467944622 0.46842137 0.468851253 0.469284549 0.469713435 0.470157281 0.470645413 0.471179768 0.471720025 0.472310364 0.472925514 0.47355251 0.474188119 0.474795133 0.47531794 0.475759283 0.476116151 0.476377487 0.476521567 0.476544961 0.47646831 0.476256043 0.475907981 0.475451052 0.474866718 0.474167451 0.473265082 0.472179338 0.470959201 0.469578281 0.468005538 0.466228694 0.46428144 0.462160617 0.459819421 0.457312733 0.454691797 0.4519317 0.449037105 0.446024477 0.442959413 0.439787805 0.436585918 0.433421463 0.430289701 0.427224338 0.424244374 0.421304002 0.418427691 0.415638193 0.412939787 0.410354048 0.407895014 0.405588716 0.403416574 0.401320398 0.399239197 0.397104174 0.394826248 0.392280236 0.389373899 0.38610588 0.382454485 0.378345087 0.373795807 0.368851647 0.363535017 0.357833385 0.351831704 0.345593587 0.339190125 0.3326675 0.326072574 0.319514543 0.313099086 0.306890741 0.300945118 0.295343012 0.29015483 0.285393044 0.281026885 0.27709122 0.2736139 0.270565078 0.267888382 0.265568644 0.263612509 0.261990562 0.260634661 0.259527668 0.258649334 0.25795126 0.257387832 0.256949216 0.256613895 0.256347448 0.256107256 0.255895466 0.255715221 0.255545005 0.255383968 0.255255342 0.255180314 0.255184665 0.255272001 0.255465657 0.255758181 0.256154895 0.256640941 0.257198244 0.257832721 0.258511856 0.259250462 0.2600431 0.260861322 0.261716768 0.262605593 0.26351583 0.264445633 0.265397742 0.266361088 0.267345935 0.268366173 0.269380018 0.270361379 0.271352798 0.272340879 0.27330865 0.274255455 0.275157318 0.276020527 0.276826426 0.277563229 0.278267279 0.278935134 0.27955088 0.280135721 0.280706748 0.281249732 0.281783551 0.282296866 0.282812297 0.28333725 0.283837318 0.284338593 0.284864813 0.285392001 0.285921767 0.286440089 0.286927283 0.287403136 0.287902325 0.288383126 0.288834006 0.289289325 0.289732933 0.290176362 0.290621445 0.29108572 0.291564599 0.292069823 0.292632669 0.29325296 0.293940753 0.294694573 0.295520127 0.296447545 0.29744491 0.29851675 0.299643829 0.300806925 0.3020062 0.303206235 0.304405227 0.305610552 0.306813553 0.308006927 0.309185296 0.310306773 0.311384663 0.312458798 0.313466191 0.314420938 0.315328509 0.316170096 0.316946894 0.317658573 0.318302244 0.318884864 0.319374278 0.319750518 0.320041448 0.320212767 0.320258826 0.320171535 0.319969714 0.319658563 0.319223404 0.318682119 0.318057865 0.317392066 0.316714823 0.316077158 0.315512538 0.315037683 0.314629331 0.314256489 0.313933551 0.31366621 0.313383996 0.313075066 0.312715381 0.312261015 0.311726153 0.311102256 0.310387611 0.309616536 0.308803186 0.307976082 0.307152703 0.306340635 0.305550247 0.304759473 0.303960562 0.303175241 0.302340642 0.301414713 0.300439477 0.299477667 0.298585832 0.297791854 0.297160506 0.29670015 0.296407357 0.296301663 0.296339035 0.296463132 0.296655491 0.296842009 0.296941146 0.296940342 0.296806529 0.296573609 0.296268463 0.295880824 0.295455053 0.295021832 0.294531301 0.293994054 0.293494165 0.293012112 0.292572632 0.292204991 0.291909739 0.291680753 0.291502774 0.291370705 0.29123877 0.291133285 0.291064739 0.291034013 0.291043952 0.29107213 0.291125029 0.291269735 0.291449085 0.291661322 0.291908905 0.292161018 0.292477503 0.292806551 0.293123782 0.293435708 0.29371728 0.293991998 0.29427807 0.294545263 0.294789374 0.295040637 0.295339689 0.295690775 0.296002403 0.296327919 0.296728626 0.297199532 0.297714218 0.296979979 0.29744415 0.297930554 0.298443645 0.298947334 0.299362719 0.299700543 0.29990834 0.300003082 0.299951702 0.299739391 0.299354166 0.298744127 0.297867209 0.296752304 0.295342237 0.293616384 0.291558474 0.289146498 0.286326036 0.283102512 0.279400468 0.275181338 0.270469993 0.265236899 0.259378761 0.252891034 0.245900624 0.238487922 0.230667107 0.222549066 0.214327686 0.206200868 0.198330596 0.190757453 0.183689944 0.177288048 0.171624213 0.166650519 0.162375979 0.15880096 0.155843563 0.153465278 0.151584536 0.150132433 0.149110004 0.14849788 0.148229159 0.148245998 0.148529246 0.14905259 0.149813958 0.150758587 0.15183121 0.153049983 0.154405743 0.155871749 0.157390729 0.158953048 0.160576157 0.162246712 0.163916804 0.165586576 0.167253673 0.168948285 0.170663781 0.172379479 0.174080387 0.175809152 0.177529506 0.179267041 0.180995539 0.182728566 0.184461497 0.186189741 0.187897518 0.189584129 0.19126185 0.192905739 0.194505215 0.196061112 0.197569124 0.199006274 0.200355634 0.201603942 0.202776179 0.203879282 0.204881787 0.205760941 0.206529066 0.207186624 0.207703248 0.20806469 0.2082735 0.208336584 0.208258316 0.208023705 0.20765575 0.207166247 0.206547767 0.205805562 0.204978913 0.204069912 0.203094199 0.202058479 0.200955823 0.199808255 0.198635384 0.197440386 0.196234614 0.195061788 0.193915896 0.192804441 0.191705011 0.190652661 0.189651489 0.188675642 0.187712587 0.186794579 0.185937665 0.185130991 0.184392527 0.183695227 0.183075272 0.182526909 0.182034291 0.181612886 0.181228966 0.180880517 0.18055702 0.180246912 0.179952227 0.1797195 0.179525666 0.179357663 0.179240003 0.179194912 0.179198749 0.179274745 0.179435574 0.179616585 0.179848142 0.180130087 0.180418894 0.180736467 0.181074053 0.181428738 0.181789652 0.182162188 0.182542339 0.182930842 0.183316723 0.183737867 0.184200421 0.184706643 0.185242109 0.185783863 0.186352596 0.186944999 0.187521569 0.188072152 0.188662201 0.189285628 0.189906858 0.190512009 0.1911029 0.191693038 0.192251913 0.192791477 0.193330787 0.193876877 0.194423132 0.194970064 0.195493095 0.196010992 0.19654946 0.19706431 0.197568327 0.198062927 0.198547222 0.19902119 0.199470215 0.199929938 0.200395815 0.200832203 0.201229773 0.201615252 0.201972321 0.202284276 0.202537403 0.202699274 0.202798933 0.20277857 0.202613264 0.20234333 0.201932415 0.201336227 0.200549357 0.199602686 0.198506191 0.197248869 0.195800997 0.194196977 0.192443408 0.190585002 0.188653789 0.186682329 0.184699148 0.182690814 0.180672117 0.178747244 0.176939346 0.175186448 0.173535392 0.171912774 0.170356669 0.16892308 0.167615473 0.166456774 0.165476657 0.164670877 0.164069436 0.163717918 0.163555324 0.163514473 0.163589925 0.163724132 0.163818471 0.163834594 0.163707502 0.163393326 0.162930496 0.162345484 0.161616556 0.160816051 0.159962475 0.159031153 0.158045933 0.157084353 0.156275369 0.155630954 0.155083455 0.154631272 0.154284485 0.154012725 0.153723679 0.153361239 0.152996302 0.152666934 0.15231625 0.151962541 0.151636973 0.151388243 0.151141055 0.150898233 0.150709674 0.15054629 0.15043471 0.15036957 0.150326937 0.150367424 0.150507614 0.150642134 0.150779366 0.150917493 0.150974587 0.151003011 0.150986865 0.150946841 0.15092463 0.150853336 0.150728703 0.150622755 0.150531307 0.150448903 0.150323622 0.150204442 0.150183067 0.150114134 0.150052331 0.150045544 0.149996512 0.149831951 0.149658196 0.149480082 0.149276376 0.148921579 0.148424305 0.14792031 0.14731428 0.14654164 0.145859756 0.14520821 0.144407406 0.143492557 0.14257665 0.141700923 0.140671454 0.139518604 0.13842427 0.137386069 0.136298887 0.135068208 0.13382221 0.132779844 0.131733954 0.13041877 0.129119225 0.128080726 0.126993112 0.125710316 0.124554869 0.123419486 0.122212302 0.120971106 0.119895525 0.118843649 0.117734071 0.116595436 0.115490559 0.114617128 0.113855857 0.112943176 0.112094007 0.111518204 0.110896781 0.110061333 0.109554332 0.109410308 0.109096419 0.108728264 0.108608473 0.108581547 0.108486358 0.108490892
"26" 0.273377419 0.276032388 0.278696954 0.281367093 0.284059048 0.286799073 0.289504826 0.292224944 0.295014203 0.297817886 0.300548851 0.303341448 0.306066513 0.308855712 0.311687142 0.314475864 0.317234188 0.32000652 0.322850257 0.325620741 0.328456581 0.331260592 0.334071457 0.336872876 0.33963719 0.342383415 0.345122635 0.347925752 0.350658 0.353381604 0.356069356 0.358766198 0.361467868 0.364126205 0.366771519 0.36942184 0.371944129 0.374592841 0.377091348 0.379605532 0.382118046 0.384598196 0.386974931 0.389394879 0.391779125 0.394070029 0.396310776 0.398656905 0.400840402 0.403041333 0.405132473 0.407291204 0.409290016 0.411340088 0.413334817 0.415292144 0.417071432 0.418911636 0.420702159 0.422440559 0.424133033 0.425881237 0.427514434 0.429221928 0.430843651 0.432445139 0.434075445 0.435736686 0.437390625 0.439095438 0.440699995 0.442356229 0.444081783 0.445610255 0.447382122 0.448817909 0.45040977 0.451991707 0.453556329 0.454978466 0.456445038 0.457714945 0.458995134 0.460169405 0.461299539 0.462258339 0.463133395 0.463811934 0.464335799 0.464877099 0.465290397 0.465660185 0.465947419 0.466168433 0.466369808 0.466563731 0.46689868 0.467088521 0.467263401 0.467499554 0.467805952 0.468219936 0.468539983 0.469151348 0.469813794 0.470577687 0.471424371 0.472182572 0.472897351 0.473791301 0.474630862 0.473270476 0.474265635 0.475245535 0.476255238 0.4772771 0.478275388 0.479356825 0.480496943 0.48149085 0.48258245 0.483653396 0.484729379 0.485788435 0.48684144 0.487897426 0.488987714 0.490071028 0.491044521 0.492014408 0.493056029 0.494115323 0.495122522 0.496074021 0.497063547 0.498064965 0.499013752 0.499962538 0.500919223 0.501897216 0.502853453 0.503777027 0.504665494 0.505534649 0.506407857 0.507315695 0.508257806 0.509112358 0.509963632 0.510812461 0.51162672 0.512390256 0.513165891 0.513967991 0.514674902 0.515311837 0.515955865 0.516593397 0.517180562 0.517761052 0.518281937 0.518768191 0.519227862 0.519602299 0.519916117 0.520204008 0.520418286 0.520525813 0.520565033 0.520522058 0.520341337 0.519989312 0.519505441 0.518839478 0.517928123 0.516830623 0.515508533 0.513923645 0.512132227 0.510140479 0.507969916 0.505659342 0.503174067 0.500603437 0.498001516 0.495327532 0.4926745 0.490107089 0.48769629 0.485440284 0.483273983 0.481268108 0.479453832 0.477825075 0.476339787 0.474925071 0.473584354 0.472294927 0.471071213 0.469835371 0.468599081 0.467413783 0.466273546 0.465233356 0.464243054 0.463364393 0.462632746 0.46202141 0.461556762 0.461264193 0.461126208 0.461102575 0.461206794 0.461438954 0.461843908 0.462402374 0.463103771 0.463969618 0.465010345 0.466201037 0.467509449 0.46887666 0.470294058 0.471732348 0.473151743 0.474539012 0.475898504 0.477220744 0.478499413 0.479711175 0.48087886 0.481954753 0.48295486 0.483875692 0.484719932 0.485485911 0.486203045 0.48687309 0.487506211 0.488084823 0.488624305 0.489124656 0.489563257 0.48999691 0.490435719 0.490899682 0.49138543 0.491906524 0.492434055 0.4930318 0.493649691 0.494294941 0.494971961 0.495631009 0.49622646 0.496763527 0.497239679 0.497635663 0.497943401 0.498128414 0.498218 0.498182267 0.498031467 0.497743547 0.497315109 0.49679023 0.496062517 0.495165676 0.494144022 0.492945075 0.491559565 0.490018845 0.488347352 0.486518592 0.48449716 0.482341975 0.480109543 0.477772534 0.475303918 0.472724199 0.470106512 0.467393667 0.464648783 0.461930752 0.459219396 0.456521928 0.453872889 0.451250821 0.448689342 0.446192026 0.443787605 0.44151783 0.439368576 0.437349617 0.435464263 0.433642268 0.431808591 0.42993173 0.427938521 0.425712228 0.423166364 0.420287192 0.417073965 0.413444638 0.409386754 0.404949248 0.400137365 0.39491874 0.389368176 0.383543104 0.377514035 0.371317744 0.36498633 0.358630776 0.352359831 0.346220851 0.340280384 0.334637702 0.329359442 0.324469775 0.319933355 0.315805256 0.312127948 0.308857054 0.305948675 0.303418159 0.301273197 0.299489647 0.297979951 0.29672575 0.295728087 0.294924945 0.294277638 0.293756455 0.293330461 0.292991817 0.292686492 0.292400628 0.292156786 0.291920662 0.29168418 0.291488588 0.291353583 0.291300297 0.291330993 0.291457236 0.291682512 0.292007416 0.292423218 0.292907506 0.293466598 0.294075519 0.294727594 0.295435786 0.296194315 0.296988547 0.297827959 0.298701018 0.299606591 0.300525844 0.30145359 0.30240345 0.30338195 0.304363996 0.305326611 0.306292832 0.307268381 0.308225006 0.309147388 0.310024023 0.310890764 0.311708808 0.31243214 0.313115448 0.313764781 0.314357907 0.31491074 0.315453798 0.315982372 0.316501379 0.316986471 0.317468852 0.317962378 0.318437934 0.318918109 0.319410384 0.31989336 0.320388794 0.320872456 0.321318626 0.321754456 0.322215497 0.322656393 0.323074251 0.323504388 0.323921025 0.324335814 0.324757516 0.325191557 0.32564792 0.326149076 0.32669729 0.327299535 0.327973515 0.328724414 0.329558998 0.330496758 0.331496626 0.332582295 0.333735913 0.334926993 0.336147726 0.337373376 0.338591129 0.339822739 0.341044575 0.342248291 0.343449771 0.344602138 0.345704108 0.346797317 0.347848773 0.348870695 0.349834144 0.350747675 0.351621538 0.352421463 0.353158772 0.353839636 0.354458362 0.354987621 0.355423003 0.355765879 0.356010675 0.356127441 0.35614717 0.356080592 0.355916411 0.355664998 0.355335921 0.354957044 0.354546547 0.354136974 0.353740036 0.35338074 0.35301882 0.352629453 0.352228761 0.351792872 0.351306468 0.350766271 0.350155652 0.349477023 0.348736823 0.347946465 0.347095013 0.346192211 0.345268041 0.344347239 0.343435407 0.34254989 0.341693521 0.340848625 0.340025485 0.339244604 0.338406503 0.337491691 0.336542368 0.33558628 0.334689438 0.333878994 0.333198398 0.332652211 0.332259685 0.332048714 0.331956714 0.331936479 0.331999898 0.332065165 0.332076967 0.332021475 0.331842214 0.331592202 0.331276298 0.330893546 0.330505043 0.330092698 0.329625696 0.329121381 0.328644842 0.328188777 0.327756584 0.327393025 0.327104062 0.326876849 0.32668674 0.326548159 0.326429397 0.326324195 0.326279134 0.326266974 0.326292783 0.326358676 0.326449811 0.326626509 0.326858789 0.327123255 0.327391386 0.327674121 0.328038186 0.32840538 0.328749388 0.32908982 0.329391122 0.329673439 0.329966158 0.330218345 0.330459207 0.330727875 0.331008762 0.331358373 0.331692457 0.332028657 0.332446903 0.3328951 0.333385378 0.332630634 0.3331801 0.333764493 0.334375292 0.334946424 0.335468769 0.335925609 0.336263865 0.33646214 0.336500496 0.336360723 0.336063087 0.335559487 0.334782332 0.333721459 0.332354575 0.330654681 0.328613549 0.326189727 0.323355287 0.32011795 0.316425502 0.312195599 0.307448506 0.302159756 0.296218663 0.289577812 0.282323956 0.27455458 0.266283691 0.257625401 0.248782963 0.239956915 0.231332287 0.222948134 0.215062439 0.207842752 0.201431111 0.195776895 0.190874785 0.186768889 0.183356434 0.180595145 0.178400591 0.176710367 0.175526083 0.174811065 0.174479827 0.174495935 0.174824715 0.175392821 0.176209688 0.177241042 0.178443059 0.179788098 0.181300953 0.182904661 0.184593752 0.186324373 0.188111648 0.189946309 0.191802278 0.193685308 0.195556566 0.197425976 0.199316114 0.201173261 0.203021571 0.204901457 0.206795841 0.208686695 0.210570455 0.212475285 0.214363828 0.216224894 0.218072668 0.219896004 0.221705347 0.223470971 0.225196138 0.22686553 0.228467405 0.22998175 0.231413707 0.23275578 0.233996406 0.235150501 0.236166298 0.237027347 0.23776409 0.238380134 0.238847598 0.239133388 0.239248142 0.239212558 0.239002287 0.238626152 0.238103032 0.237454772 0.236641228 0.235708252 0.234680623 0.233556986 0.232351005 0.231092766 0.229788482 0.228414491 0.227017313 0.225615412 0.224189401 0.222819805 0.221472681 0.22016713 0.218859106 0.217644587 0.21649541 0.215355843 0.214235932 0.21317865 0.212203965 0.211288214 0.210443273 0.209632814 0.208921224 0.208285511 0.207716405 0.207215264 0.20675233 0.206324354 0.205932558 0.20556213 0.205233246 0.20494546 0.204703942 0.204513356 0.204371691 0.204327226 0.204330012 0.204407781 0.204586133 0.204791278 0.205036208 0.205372185 0.20575963 0.206159502 0.206589282 0.207025856 0.207469687 0.207916945 0.208397865 0.208883852 0.209366232 0.209868222 0.210401192 0.210973039 0.211557329 0.212145954 0.212746114 0.213356107 0.213961899 0.214530572 0.215134412 0.215750888 0.216336533 0.216907188 0.217429742 0.217963159 0.218498304 0.219024599 0.219534159 0.220040813 0.220557019 0.221122995 0.221655652 0.22216998 0.222735032 0.223264202 0.223799244 0.224331483 0.224851146 0.225366831 0.225869402 0.226393133 0.226940751 0.227444366 0.227882624 0.228282258 0.228648558 0.229014561 0.229323372 0.229538962 0.229701161 0.229732871 0.229648054 0.229476884 0.229159504 0.228660658 0.227957636 0.22709322 0.226063848 0.224841923 0.22336781 0.221710652 0.21990028 0.217986628 0.215941727 0.213807479 0.211678579 0.209520698 0.207374737 0.205329105 0.203374311 0.201507688 0.199723288 0.197931141 0.196203113 0.194592968 0.1930677 0.191671193 0.190475926 0.189506665 0.188750058 0.188204557 0.187904313 0.187792584 0.187789798 0.187817365 0.187858433 0.187825695 0.187626421 0.187267974 0.186766908 0.186119467 0.185332745 0.184441596 0.18347849 0.182409629 0.181254253 0.180145055 0.179156691 0.178336143 0.177623898 0.177010536 0.176486388 0.176073223 0.175688088 0.175254762 0.174838141 0.174472556 0.174075574 0.17368494 0.17335619 0.173145965 0.172923788 0.172697395 0.172564194 0.172442213 0.172341377 0.172230363 0.172149003 0.172199726 0.172348008 0.172510922 0.172649056 0.172758818 0.172819018 0.172863185 0.172883466 0.172874838 0.172918916 0.172960788 0.172925204 0.172919899 0.172904223 0.172896087 0.172839478 0.172774181 0.172782779 0.172693357 0.172576889 0.1725128 0.172448084 0.172303587 0.172144741 0.171900511 0.171556875 0.171075851 0.170511678 0.169967845 0.169350281 0.168496117 0.167619601 0.166805327 0.165864795 0.164855972 0.163892031 0.162886187 0.161758408 0.160466433 0.159151405 0.157871976 0.156557351 0.155188456 0.153773382 0.152384058 0.15116258 0.149726376 0.148191467 0.146905631 0.145615026 0.144231647 0.142864466 0.141554087 0.140281081 0.138902485 0.137619108 0.136489257 0.135237813 0.134011269 0.132907301 0.131904319 0.130964577 0.129885644 0.128932968 0.128150344 0.127387539 0.126509443 0.125885963 0.125661239 0.125389367 0.125025198 0.124785893 0.12482167 0.124739036 0.124741644
"27" 0.24106425 0.243127406 0.245219901 0.247319743 0.249405384 0.251524985 0.253629833 0.255750716 0.257967591 0.260163367 0.262346923 0.264490306 0.266640037 0.268888205 0.271131724 0.273271948 0.275367022 0.277446926 0.279576629 0.281751722 0.284041643 0.286275446 0.28853339 0.290750802 0.292988449 0.2951563 0.297317564 0.299568176 0.301770538 0.30396086 0.306115896 0.308286637 0.310403883 0.312481612 0.314561188 0.316636652 0.31855303 0.32066071 0.322649986 0.324660003 0.326663584 0.328609824 0.330422938 0.332314879 0.334199548 0.3360053 0.337789953 0.339637041 0.341354162 0.343080431 0.344760269 0.346439809 0.348042309 0.349634677 0.351226956 0.35269168 0.354073793 0.355389714 0.356732786 0.35801667 0.35937199 0.360730171 0.362039745 0.363412023 0.364693791 0.365929902 0.367214978 0.368600547 0.369899094 0.371331036 0.372647375 0.37400493 0.375321954 0.376396596 0.377641708 0.378580511 0.379698575 0.380882025 0.382103711 0.383225471 0.384472251 0.38555932 0.386610061 0.387598157 0.38850075 0.389347255 0.39007479 0.390679151 0.391174287 0.391618699 0.392134011 0.392515808 0.392836839 0.393189281 0.393423438 0.393672884 0.394007236 0.394198567 0.394539773 0.394733936 0.395005286 0.395401597 0.395861447 0.396430373 0.397090942 0.397652239 0.398462892 0.399212927 0.399755925 0.40054509 0.401405871 0.400152177 0.400986373 0.401797265 0.402657419 0.403504878 0.404354334 0.405213028 0.406166345 0.407050848 0.407966912 0.408874154 0.409839809 0.41077888 0.411685854 0.412584782 0.413527608 0.414430678 0.415285617 0.416116238 0.416993469 0.417858541 0.418699563 0.419532567 0.42040652 0.421256661 0.422077298 0.422896415 0.423741758 0.424638003 0.42549023 0.426313102 0.427125365 0.427946955 0.428793818 0.429659218 0.430539072 0.431364775 0.432190776 0.433007002 0.433784604 0.434528708 0.435255557 0.436024398 0.436695457 0.437290996 0.437928796 0.438539416 0.439090043 0.439632475 0.440126896 0.440571725 0.440947056 0.441260427 0.441535592 0.441766083 0.441909939 0.44194746 0.441933066 0.441839576 0.441640019 0.441317171 0.440868258 0.440285742 0.439498693 0.438541383 0.437412262 0.436042845 0.434485257 0.432772875 0.430876583 0.428844869 0.426668644 0.424373031 0.422087669 0.419757336 0.417444468 0.41522485 0.413135171 0.411166757 0.409290135 0.407551736 0.405962467 0.404537916 0.403256178 0.402035981 0.400869936 0.39973107 0.398653507 0.3975555 0.396466196 0.395430118 0.394447535 0.393535018 0.392667532 0.391943842 0.39135775 0.390878558 0.390525818 0.390321732 0.390219241 0.390231192 0.39037621 0.390645236 0.391062111 0.391625166 0.392310828 0.393157899 0.394183695 0.395342052 0.396613747 0.397954345 0.399329692 0.400726676 0.402113676 0.403471023 0.404791087 0.406077176 0.407324791 0.408509821 0.409645408 0.410714209 0.411709607 0.412629664 0.413485616 0.414277971 0.415017426 0.415715516 0.416354358 0.416932017 0.417465389 0.417962939 0.41842249 0.418881297 0.419353366 0.419839442 0.420359761 0.420896828 0.421423495 0.421982318 0.422552407 0.42313534 0.423733771 0.424322069 0.424848229 0.425323695 0.425753355 0.426127255 0.426424384 0.426652908 0.42684418 0.426939338 0.426946074 0.42688328 0.426747173 0.426526785 0.42614007 0.425618947 0.4249883 0.424207032 0.423267663 0.422163486 0.420889258 0.419454336 0.417835176 0.416070819 0.41419661 0.412198246 0.410070837 0.40781948 0.40548408 0.403032005 0.400513113 0.397972107 0.395416945 0.392897666 0.390419453 0.387962013 0.385553956 0.383209944 0.380970389 0.378854305 0.376851112 0.374971062 0.373213977 0.371536642 0.369866639 0.368135095 0.366301417 0.364258528 0.361925036 0.359319031 0.356438607 0.353197575 0.349588096 0.345657319 0.341411978 0.336818784 0.331951797 0.326853126 0.321569234 0.316135794 0.310593575 0.305039465 0.29956165 0.294207215 0.28903681 0.284132868 0.279550403 0.27530843 0.27137655 0.267802447 0.264623046 0.261823118 0.259337783 0.257173181 0.255347729 0.253823549 0.252549887 0.251511395 0.250686735 0.250035405 0.249516532 0.249111697 0.248786643 0.248521924 0.248294502 0.248081222 0.247882277 0.247687116 0.247483656 0.247303188 0.247180253 0.247117341 0.247126028 0.247221425 0.247398436 0.247666731 0.248029068 0.248442188 0.248915449 0.249433443 0.249998346 0.25060913 0.25125581 0.251942217 0.252664179 0.253399611 0.254160553 0.254946113 0.255742818 0.25655219 0.257392108 0.258244395 0.259090543 0.259941995 0.260799408 0.261645854 0.2624605 0.263241678 0.264000595 0.264698982 0.265327483 0.265922338 0.266496539 0.267031074 0.267527759 0.268018663 0.268504232 0.268977731 0.269415826 0.269864947 0.270329595 0.270764291 0.271195173 0.271649659 0.272093117 0.27252987 0.27295661 0.273360729 0.273764014 0.274172902 0.274556994 0.274917722 0.275286168 0.275654554 0.276019245 0.27639547 0.276787251 0.27718538 0.277617663 0.278093964 0.278619826 0.279224306 0.279899746 0.280647397 0.281494886 0.282392234 0.283353209 0.284378499 0.285426617 0.286496282 0.287578553 0.288649887 0.289740562 0.290824592 0.291903824 0.292977333 0.294005692 0.294989437 0.295948803 0.296866 0.297765136 0.298617184 0.299405277 0.300144374 0.300828069 0.301444471 0.302015841 0.30253309 0.302967042 0.303333491 0.303618968 0.303808212 0.303904057 0.303900719 0.303800076 0.303598285 0.303307295 0.302950561 0.302556157 0.302134424 0.301699221 0.301293731 0.300928324 0.300539702 0.300133079 0.299727082 0.299292386 0.298814327 0.298291326 0.297708243 0.297059864 0.296354294 0.295606524 0.294822901 0.293999344 0.293153584 0.292299479 0.291442126 0.290606856 0.289815187 0.289050698 0.288297325 0.28756234 0.286796004 0.285981119 0.285115033 0.284234703 0.283421159 0.282677501 0.2820535 0.281575084 0.281233251 0.281049341 0.28097564 0.280996621 0.281075597 0.281159252 0.28120777 0.281169176 0.281048805 0.280856818 0.280581743 0.280250996 0.27991733 0.279543757 0.279125869 0.278702408 0.278293461 0.277869076 0.277473032 0.277147621 0.276895702 0.276699603 0.276540488 0.276440561 0.276345074 0.27625668 0.276192039 0.276160955 0.276166737 0.276203483 0.276241958 0.276344031 0.276501209 0.276661396 0.276849478 0.27706033 0.277293265 0.277544916 0.277798861 0.278022766 0.278213024 0.278405011 0.278591007 0.278740764 0.278892219 0.279069692 0.279265016 0.279477745 0.279677272 0.279905438 0.280188233 0.280506581 0.280851722 0.280290514 0.280726403 0.281224698 0.281761676 0.282287031 0.282758653 0.283203989 0.28353107 0.283756077 0.28383255 0.283759445 0.283533901 0.283142507 0.282533556 0.281686127 0.280547321 0.27915749 0.27745837 0.275443316 0.273091257 0.270422518 0.267347485 0.263882101 0.259997994 0.255640119 0.250708193 0.245186105 0.23915118 0.232682317 0.225764021 0.21852982 0.211160362 0.203778714 0.196548924 0.189533815 0.182956398 0.176955938 0.171629548 0.166954011 0.162901759 0.159525156 0.156741858 0.154501438 0.152718961 0.151358053 0.150425926 0.149876148 0.14965722 0.149721742 0.150004342 0.150505975 0.151255488 0.152177528 0.1532114 0.154350683 0.155627176 0.156990558 0.15842025 0.159881666 0.16141507 0.162983596 0.164545432 0.166118309 0.167706057 0.169315249 0.170929849 0.172512591 0.174097851 0.175689146 0.177266106 0.178828761 0.180423692 0.182042196 0.183644831 0.185207203 0.186740801 0.188266516 0.189784378 0.191241637 0.192653805 0.194005042 0.195308566 0.196517184 0.197651759 0.198711947 0.199712425 0.200610489 0.201399237 0.202054873 0.20261088 0.203063309 0.20333834 0.203479275 0.203500867 0.203366295 0.203094453 0.202670857 0.202145264 0.201496005 0.200716957 0.199822307 0.19884412 0.197811425 0.196692735 0.195518523 0.194304749 0.193050861 0.191770405 0.190471023 0.189185455 0.187957749 0.186759129 0.185590699 0.184430793 0.183336169 0.182314336 0.181323111 0.180355951 0.179440647 0.178572804 0.177746311 0.176993534 0.176304758 0.175704479 0.175155878 0.174664065 0.174219534 0.173816562 0.173452958 0.173128173 0.172800794 0.172489628 0.172257721 0.172088072 0.171949342 0.171854734 0.171825618 0.171875536 0.171991408 0.172169313 0.172383904 0.17264989 0.172961369 0.173302531 0.173674107 0.174087316 0.174500406 0.174923122 0.175348088 0.17581296 0.176261678 0.17668809 0.17713663 0.177615628 0.178138688 0.178660706 0.179178163 0.17971535 0.180244297 0.180734783 0.181209564 0.181713149 0.18221949 0.182739615 0.183228895 0.183675751 0.184115067 0.184566706 0.185011461 0.185459331 0.185904622 0.186370596 0.186828986 0.187256068 0.187715858 0.188234866 0.188699365 0.189134717 0.189596653 0.19006291 0.190505832 0.190928891 0.191347912 0.191776827 0.192179188 0.192566842 0.192926452 0.193271264 0.193581715 0.193850398 0.194086492 0.194267526 0.194326907 0.194295868 0.194183126 0.193945989 0.193573356 0.193033084 0.192310467 0.191427425 0.190395236 0.189192548 0.187832758 0.186333939 0.184707895 0.182968244 0.181197852 0.179408029 0.177595273 0.175806388 0.174056441 0.172415704 0.170863196 0.169330612 0.167793825 0.166318625 0.164942861 0.163652211 0.162475988 0.161456957 0.160634026 0.160009399 0.159593984 0.159375384 0.159294024 0.15931946 0.159393027 0.159435138 0.159423664 0.159303784 0.15902254 0.158627555 0.158113524 0.157451659 0.156667575 0.155863181 0.155044749 0.154125422 0.153151348 0.152285367 0.151568979 0.150947914 0.150384426 0.149897799 0.14950566 0.149168015 0.148806468 0.148424909 0.148124263 0.147888273 0.147576198 0.14729175 0.147107229 0.146897733 0.146705642 0.146638781 0.146591321 0.146578103 0.146519601 0.146478519 0.146561846 0.146693215 0.14680618 0.14690657 0.147026971 0.147129059 0.147223562 0.14726384 0.147265986 0.147305638 0.147340432 0.147355556 0.147403017 0.14740251 0.14744249 0.147399798 0.147346422 0.147338897 0.147259012 0.147244275 0.147255346 0.147180438 0.147017509 0.146815509 0.146650627 0.146412641 0.146054491 0.145609885 0.145106301 0.144515589 0.14372462 0.142970979 0.142264932 0.141442955 0.14060308 0.13976723 0.138843492 0.137801886 0.136736855 0.135708287 0.134593189 0.133365974 0.132170185 0.130920678 0.129768819 0.128624633 0.127241284 0.125908494 0.124722235 0.123603344 0.12247622 0.121295802 0.120177567 0.119114831 0.117840827 0.116705544 0.115635216 0.11458192 0.113439463 0.112466998 0.111556083 0.110520504 0.109616071 0.108789004 0.108108655 0.107279837 0.106430992 0.106095664 0.105972409 0.105559997 0.10517364 0.105213679 0.105231076 0.105132356 0.105143175
"28" 0.233018756 0.23500216 0.236995965 0.238955438 0.240947455 0.242932901 0.244963154 0.246981382 0.249084115 0.25116998 0.253199011 0.255243331 0.257304519 0.259415716 0.261520475 0.2635611 0.265501827 0.267427653 0.269395292 0.271464616 0.273641378 0.275734842 0.277866423 0.27999115 0.28210476 0.284122944 0.286176771 0.288315713 0.290405124 0.292491853 0.294542909 0.296581119 0.298601687 0.300595075 0.302590847 0.304504156 0.306346089 0.308335453 0.310208797 0.312143803 0.314047158 0.315892071 0.317620248 0.319442302 0.321227312 0.322946846 0.324676573 0.326407671 0.328060567 0.329743654 0.33130756 0.33293435 0.33443886 0.335990548 0.337494224 0.338901818 0.34017694 0.341429919 0.342662513 0.343821049 0.345071763 0.346380144 0.347605675 0.348909765 0.350073516 0.351245642 0.352401614 0.353636533 0.354938328 0.356232554 0.357445627 0.358672559 0.359967977 0.360964388 0.362032354 0.362902194 0.363886535 0.364979655 0.366066664 0.367166817 0.368299663 0.369343281 0.37035808 0.371201009 0.372023612 0.372792959 0.373428315 0.373985052 0.374401897 0.374866605 0.375261426 0.375579804 0.375891656 0.3760809 0.376398951 0.376491725 0.376761168 0.37695992 0.377072453 0.377250999 0.377485096 0.377835572 0.378157496 0.378656954 0.379251748 0.379749179 0.38044095 0.380951375 0.381590903 0.382320344 0.382977456 0.381965101 0.382621348 0.383290678 0.384001285 0.384652019 0.385295987 0.386009634 0.38684237 0.387518674 0.388212681 0.388924986 0.389671683 0.390431583 0.391165763 0.391858906 0.392569274 0.393295377 0.394017786 0.394669175 0.395356476 0.396057993 0.396759808 0.397424161 0.398132861 0.398837477 0.399510354 0.400217175 0.400910199 0.401627779 0.402318597 0.402975768 0.403644085 0.404285342 0.404959381 0.405634314 0.406333268 0.40693602 0.407550782 0.408155531 0.408706605 0.409226805 0.409738392 0.410279661 0.410720021 0.411100328 0.411503941 0.411865205 0.412163585 0.412453771 0.412730545 0.412966013 0.413143337 0.41325593 0.413309187 0.413314283 0.413256615 0.413110524 0.412918329 0.41265294 0.412306011 0.411822468 0.411269128 0.41060859 0.409756899 0.408751756 0.407584786 0.406227976 0.404727131 0.403072268 0.401262343 0.399323374 0.397246271 0.395089805 0.392958134 0.390789479 0.388644189 0.386573702 0.384630173 0.382786095 0.381025463 0.379389167 0.377901822 0.376541883 0.37527436 0.374072999 0.372926056 0.371803999 0.370745778 0.369679779 0.368583173 0.367539793 0.366568744 0.365669966 0.364799917 0.364062041 0.363420427 0.362877756 0.362443686 0.362150252 0.361953735 0.36184895 0.361858964 0.361973494 0.362220556 0.362596303 0.363074094 0.363687664 0.364461422 0.365331262 0.366292566 0.367307633 0.368364394 0.369427919 0.370488822 0.371518344 0.372520357 0.373473257 0.374407887 0.375290453 0.376137495 0.376910836 0.377626419 0.378278434 0.378869414 0.379392803 0.37988019 0.380347788 0.380761504 0.381120682 0.381455541 0.381761491 0.382010669 0.38225463 0.382511705 0.382794201 0.383100569 0.383439153 0.38376838 0.384144485 0.384560376 0.384988964 0.38542822 0.385875702 0.386285394 0.386649817 0.386953413 0.387213886 0.387425005 0.387562722 0.38761273 0.387548327 0.387398362 0.38715595 0.386811465 0.386364341 0.385740459 0.384973079 0.384129763 0.383163989 0.38203162 0.38074261 0.379337311 0.377818763 0.376138747 0.374369621 0.372536719 0.370626628 0.368651688 0.366594702 0.364503264 0.362334013 0.360127866 0.357915103 0.355723023 0.35356158 0.351445705 0.349359095 0.347337127 0.345377982 0.343500853 0.341730475 0.340067476 0.338534206 0.337105691 0.335733682 0.334380269 0.332975805 0.331471711 0.329792798 0.327880353 0.325738192 0.323368102 0.320725381 0.317785621 0.314548314 0.311034739 0.307234824 0.303192347 0.298947453 0.294548869 0.290016472 0.285385936 0.280730695 0.276122242 0.271596432 0.267193377 0.262996167 0.259054482 0.255384117 0.25196445 0.248833477 0.24603048 0.243541166 0.241309792 0.239346966 0.237678245 0.236269251 0.235062525 0.23405838 0.233250231 0.232607216 0.232086986 0.231668562 0.231327519 0.231045485 0.230791792 0.230552956 0.230325952 0.230108142 0.229887664 0.229681358 0.229530051 0.229430914 0.229392797 0.22943297 0.229548231 0.229751348 0.230028525 0.230343819 0.230714068 0.231126294 0.231578052 0.232070118 0.232596904 0.233152688 0.233737811 0.23435241 0.23498477 0.235636383 0.236304253 0.23699151 0.23771292 0.238448098 0.239155903 0.239864141 0.240569428 0.241265282 0.241950482 0.242594853 0.243215114 0.243795499 0.244324088 0.244829506 0.245307103 0.245746568 0.246153697 0.246550947 0.246946275 0.247326076 0.247685909 0.248048514 0.248413444 0.248755947 0.249088183 0.249452904 0.249823362 0.250184298 0.25053516 0.250861943 0.251171321 0.251494676 0.251813889 0.252107084 0.252412945 0.252721757 0.253030837 0.253344953 0.253669024 0.253998578 0.254352152 0.254753947 0.255208433 0.255714267 0.256284446 0.256921142 0.257629126 0.258384466 0.259206027 0.260063678 0.260932535 0.261835515 0.262744457 0.263653994 0.264577687 0.265497684 0.266405821 0.267314076 0.268174469 0.269009054 0.269850701 0.270629823 0.271383137 0.272109509 0.272787035 0.273417264 0.273999125 0.274529159 0.275024712 0.275477916 0.275855899 0.276180923 0.27644363 0.276630551 0.276719868 0.276734114 0.276669085 0.276524425 0.276307881 0.276032805 0.275733858 0.275392443 0.275042444 0.274718553 0.274414152 0.274104506 0.273774505 0.273429662 0.273058116 0.27263099 0.272164941 0.27165699 0.271095008 0.270489454 0.269832432 0.269152105 0.268457383 0.267735273 0.267015159 0.266319036 0.265646219 0.264995575 0.264363408 0.263742715 0.263149053 0.26252386 0.261830449 0.261093348 0.260349125 0.259655476 0.25900954 0.258469582 0.258056402 0.257762939 0.257608026 0.25753507 0.257539034 0.257591873 0.257644027 0.257644564 0.257573932 0.25743711 0.257250279 0.257012993 0.256740272 0.256468534 0.256183714 0.255845189 0.255490869 0.255150318 0.254806399 0.25448972 0.254235893 0.254036486 0.253870845 0.253738731 0.253643513 0.253556848 0.253490508 0.253435224 0.253426313 0.253444582 0.253449887 0.253493637 0.253604293 0.253728986 0.253888994 0.254072875 0.254237473 0.254446745 0.254659563 0.254866928 0.255048931 0.255204767 0.255385429 0.255560637 0.2557078 0.255864203 0.256046474 0.256215632 0.25641802 0.256611943 0.256821364 0.257093728 0.257401079 0.257707894 0.257211983 0.257587135 0.257990539 0.258432984 0.258889318 0.259300172 0.25965625 0.25992468 0.260100633 0.260182381 0.260152906 0.259977132 0.259662271 0.259167969 0.258467525 0.257535517 0.256376892 0.254974186 0.253327906 0.251415193 0.24925074 0.246782109 0.243961245 0.240794107 0.237199515 0.233086437 0.228457943 0.223358035 0.217856362 0.211946875 0.20570977 0.19927296 0.192806587 0.186438546 0.180191785 0.174256846 0.168811291 0.163930908 0.159582734 0.155784681 0.152592823 0.149922788 0.147727698 0.145957038 0.144592434 0.143625736 0.143029809 0.142741039 0.142716438 0.142911971 0.143345252 0.143981054 0.144779384 0.145711273 0.146767572 0.147935554 0.149171203 0.150461763 0.151817933 0.153213948 0.154630676 0.156066269 0.157513529 0.158947974 0.160409078 0.161864832 0.163293108 0.164709389 0.166130558 0.167538866 0.168950215 0.170358375 0.171776086 0.173185453 0.174573019 0.175951481 0.177315369 0.17865029 0.179938138 0.181190133 0.182399422 0.183558822 0.184631214 0.185617223 0.186528921 0.187368065 0.188125536 0.188803867 0.189363673 0.189815879 0.190177426 0.1904203 0.190520689 0.190498084 0.190354466 0.19008781 0.189681828 0.189174339 0.188576564 0.187847525 0.186986223 0.186060011 0.185082063 0.184057966 0.182955801 0.181813285 0.180645078 0.179430395 0.178205803 0.176975816 0.175797269 0.174653292 0.173560053 0.172471851 0.171441108 0.170449451 0.169503644 0.16860117 0.167728841 0.166908786 0.166144773 0.16543898 0.164769158 0.164165303 0.16362381 0.163122505 0.162685499 0.162322283 0.161989242 0.161681995 0.161369964 0.161075503 0.160828069 0.160634637 0.160453886 0.160313502 0.160264179 0.160270557 0.160344973 0.160488591 0.160656542 0.160879686 0.161164939 0.161457226 0.161771506 0.162118673 0.162476927 0.162851185 0.163239449 0.163640738 0.164021507 0.164397508 0.164792746 0.165195033 0.165624827 0.166070312 0.166507632 0.166953206 0.167412102 0.167851672 0.168308496 0.168777496 0.169218779 0.16965577 0.170072481 0.170464054 0.170875371 0.171264723 0.171621442 0.171985611 0.17236875 0.172784925 0.173209339 0.173599303 0.174001426 0.174431235 0.174842611 0.175242901 0.175636604 0.176030293 0.176401839 0.176741913 0.17710118 0.17747663 0.177818149 0.178142309 0.178457245 0.178753152 0.179020435 0.17923224 0.179405481 0.179544702 0.179572031 0.179512545 0.179381862 0.179133132 0.178737134 0.178202361 0.177542552 0.176760867 0.175820023 0.174689099 0.173407212 0.172011569 0.170505151 0.168898553 0.167268485 0.165642142 0.164002374 0.162359804 0.160747215 0.159246281 0.157792926 0.156353951 0.15497981 0.153659239 0.152394697 0.151204735 0.150123835 0.149175003 0.148403868 0.147810251 0.147387192 0.147159696 0.147095546 0.14712745 0.147184461 0.147254735 0.147283882 0.147205949 0.14697364 0.146644965 0.146228224 0.145635441 0.144937679 0.144208997 0.143438026 0.142625809 0.141790941 0.141029686 0.140354589 0.139746279 0.139208958 0.138752282 0.138380408 0.138045907 0.137677386 0.137316093 0.137009725 0.136727482 0.136433855 0.136228561 0.136119068 0.136003718 0.135836452 0.135720834 0.135640174 0.135633662 0.135597348 0.135572433 0.135666758 0.135795295 0.135866299 0.135995641 0.136148795 0.136230975 0.13633652 0.136391044 0.136433542 0.136512071 0.136535659 0.136541814 0.136531815 0.136492804 0.136522278 0.136510193 0.136487141 0.13652426 0.136500314 0.136487544 0.13648127 0.136408538 0.136300743 0.136151373 0.135922104 0.135745391 0.135499686 0.135014713 0.134507656 0.134015441 0.133384511 0.132742852 0.132035181 0.131352693 0.130641758 0.129821286 0.129031837 0.128040075 0.127000064 0.126033247 0.125081986 0.124010071 0.122789592 0.121619865 0.120523646 0.119494215 0.11817839 0.116938502 0.116063617 0.115020581 0.113857388 0.112764984 0.111738347 0.110710837 0.109531075 0.108458504 0.107408568 0.106335312 0.105323143 0.104215771 0.103419267 0.102601945 0.101671532 0.100941479 0.100327924 0.099802449 0.0992378 0.098888844 0.098752156 0.098416515 0.097969726 0.09788774 0.097923972 0.097825892 0.098023281
"29" 0.242552012 0.244836241 0.247131631 0.249411955 0.251732498 0.254060328 0.256376922 0.258663297 0.261068672 0.263473719 0.265822828 0.268185377 0.270513237 0.272934496 0.275340497 0.277692586 0.280024588 0.282343 0.284736872 0.287094653 0.289546013 0.291940391 0.294354022 0.296757042 0.29915911 0.301492065 0.30383575 0.306233436 0.308586568 0.310930908 0.313264281 0.315590858 0.317918271 0.320168436 0.322447985 0.324719578 0.326875687 0.329152942 0.33128342 0.333469659 0.335613579 0.337755114 0.339737892 0.34182936 0.343880326 0.345846236 0.347832382 0.349800348 0.351696402 0.353618652 0.35537973 0.3572523 0.358979434 0.360721737 0.362455904 0.364138395 0.365669787 0.367157757 0.368687481 0.370133489 0.37154001 0.37305373 0.374399841 0.375855714 0.377219737 0.378630519 0.380021811 0.381420493 0.382812619 0.384294659 0.38566944 0.387054086 0.388503224 0.389786512 0.391164541 0.392312616 0.393678308 0.394954145 0.396236151 0.397473693 0.398704201 0.399860859 0.40089944 0.401965618 0.402906179 0.403752118 0.404468209 0.405102253 0.405519754 0.406017721 0.406364024 0.40666905 0.406948835 0.407203436 0.407375097 0.407527059 0.407882869 0.407987744 0.408164501 0.408356935 0.408643603 0.409001112 0.409382731 0.409868658 0.410523444 0.411099792 0.411879718 0.412560344 0.413253993 0.414070696 0.414762795 0.413587093 0.414472401 0.415274024 0.416059941 0.416808635 0.41760847 0.418454409 0.419348925 0.420163512 0.421008825 0.421811849 0.422669172 0.423492491 0.424317092 0.425169766 0.42599231 0.42682156 0.427639395 0.428420424 0.429240584 0.430054247 0.430881739 0.431691021 0.432540029 0.433406413 0.434233755 0.435060978 0.435943037 0.436836481 0.437676877 0.438503981 0.439319342 0.440111876 0.440900922 0.441676497 0.44246307 0.443177491 0.443897069 0.444557101 0.445183575 0.445751846 0.446304142 0.446892381 0.447344542 0.447718471 0.448130846 0.448498607 0.448802382 0.449069232 0.44931376 0.449495643 0.449647546 0.449748456 0.449808449 0.449813575 0.449748099 0.449589789 0.449403763 0.449129075 0.448765188 0.448262751 0.447639465 0.446856946 0.445892036 0.444780976 0.443486989 0.441942066 0.440237582 0.438394129 0.436368823 0.434203118 0.431907982 0.42953521 0.427152425 0.424713135 0.42230016 0.419958621 0.417754441 0.415670276 0.413673639 0.411820531 0.410136104 0.408600032 0.407201618 0.405875504 0.404600501 0.403359592 0.402187794 0.401012421 0.399831295 0.398693472 0.397601128 0.39659363 0.395651847 0.394827366 0.394118816 0.393522501 0.393056333 0.39274466 0.39255181 0.392460108 0.392504334 0.392669857 0.392967284 0.393395603 0.393935442 0.394644231 0.39553991 0.396548688 0.397655219 0.39883849 0.400057495 0.401293606 0.402523249 0.40370822 0.404851675 0.405978829 0.40708679 0.408109397 0.40909481 0.410002559 0.410829157 0.411592692 0.412289262 0.412920952 0.413501203 0.414052576 0.414532751 0.414975435 0.415378898 0.415725291 0.416034609 0.416326076 0.416618049 0.416938692 0.417290241 0.417675704 0.418074042 0.418522865 0.419015169 0.419534087 0.420070738 0.420623899 0.421145618 0.421623796 0.422057271 0.422420293 0.422700971 0.422886431 0.422986448 0.422950566 0.422780752 0.422479391 0.422037274 0.42147845 0.420707554 0.419775456 0.418725401 0.417519897 0.416157693 0.414638728 0.412994802 0.411233604 0.409321547 0.407298476 0.405204266 0.403034061 0.400808632 0.398506105 0.396154851 0.393720835 0.391275525 0.388858765 0.386455983 0.384084344 0.381757736 0.379455268 0.377214432 0.375044346 0.372959912 0.370989174 0.369141668 0.367417574 0.36580506 0.364249676 0.362692535 0.361073285 0.359338015 0.357414901 0.355208546 0.35273236 0.349981785 0.346877694 0.343424112 0.339646339 0.335561663 0.331140816 0.326436967 0.321506292 0.316403002 0.311159998 0.305817217 0.300459445 0.295171976 0.289999008 0.284984946 0.280219555 0.275761068 0.271631807 0.267800927 0.264317006 0.261205584 0.258455783 0.256010652 0.253876984 0.252070665 0.25055173 0.249265566 0.248208746 0.247373462 0.246709809 0.246168569 0.245744452 0.245394155 0.245104402 0.244853869 0.244625121 0.244418249 0.244215116 0.244017586 0.24384287 0.243718714 0.243661329 0.2436672 0.243765458 0.243935555 0.24418208 0.244505495 0.244880378 0.245324641 0.245815292 0.246346161 0.246920362 0.247532696 0.248167917 0.248834535 0.249529243 0.250252157 0.250999242 0.251768321 0.252551794 0.253366232 0.254186004 0.254977107 0.255781233 0.256600112 0.257402509 0.258176655 0.258918554 0.259635329 0.260313213 0.260930002 0.261501759 0.262040347 0.262541533 0.263017982 0.263482839 0.263938606 0.264401853 0.264837235 0.265262961 0.265704483 0.266129673 0.266544878 0.266962081 0.267381608 0.267806441 0.268214494 0.268605798 0.268989056 0.269381493 0.26976037 0.270108879 0.270475119 0.270835698 0.271186233 0.271540761 0.271907508 0.272274017 0.272674739 0.27314195 0.273645282 0.274211884 0.274843127 0.275539607 0.276328802 0.277172178 0.278083563 0.279045105 0.280029565 0.281065404 0.282097757 0.283107549 0.284130454 0.285153776 0.28615278 0.287146538 0.288103372 0.28900969 0.28992781 0.290803462 0.291630149 0.292431027 0.293174624 0.293866336 0.294515163 0.295111924 0.295662612 0.296154857 0.29656899 0.296905756 0.297162116 0.297329754 0.297385782 0.297364473 0.297272861 0.297089219 0.296811521 0.296474844 0.296105742 0.295701861 0.295299292 0.294901967 0.294534594 0.294189095 0.293824106 0.293448508 0.293062478 0.292629987 0.292141378 0.291606128 0.29102242 0.290391952 0.289718956 0.288975537 0.288200498 0.287413388 0.286630929 0.285861641 0.285102248 0.284380138 0.283676028 0.282961756 0.282282412 0.28157118 0.280791193 0.279958665 0.279113591 0.2783328 0.277632982 0.277062863 0.27661249 0.276278496 0.276090801 0.2760337 0.276055515 0.276118875 0.276177555 0.276194006 0.276148766 0.276015073 0.275819719 0.275572866 0.275262475 0.274937153 0.274607062 0.274212271 0.273786277 0.27339983 0.273020029 0.272677571 0.272391349 0.272159308 0.271972209 0.271834761 0.271746665 0.271667212 0.271605551 0.27156654 0.27154997 0.271550268 0.27158305 0.271649569 0.271773636 0.27193889 0.272122413 0.272318482 0.272516459 0.272766858 0.273023456 0.273264468 0.273493141 0.273709506 0.273925006 0.274109483 0.274282217 0.274460733 0.274637192 0.274832308 0.275069296 0.275263131 0.275469869 0.275763243 0.27609849 0.276455104 0.275887579 0.276318759 0.276792198 0.277308732 0.277798682 0.27823627 0.278618664 0.278889686 0.279076964 0.279163986 0.279097676 0.278873444 0.278483033 0.277871311 0.277018815 0.275909245 0.274534851 0.272883177 0.270936102 0.268670499 0.266104281 0.263155729 0.259789944 0.256005496 0.251755744 0.246927083 0.241501719 0.235588998 0.2292445 0.222491249 0.215408519 0.208158657 0.20089142 0.193766758 0.186843857 0.180325896 0.174372822 0.169083133 0.164394721 0.160316139 0.156908035 0.154084548 0.15178512 0.149944916 0.148531154 0.147536695 0.146908447 0.1466299 0.146657065 0.146916658 0.147376403 0.148047403 0.1489003 0.149886966 0.151001722 0.152244225 0.153585345 0.154992864 0.156454891 0.157955244 0.15948388 0.161030024 0.162594855 0.164141253 0.165708289 0.167277589 0.168825299 0.17037341 0.171943814 0.173506394 0.175056934 0.176597893 0.178163528 0.179722294 0.181254953 0.182777017 0.184288308 0.185779586 0.187240571 0.188656822 0.190024972 0.191342875 0.192572027 0.193715274 0.194788694 0.195808187 0.196718022 0.197505698 0.198206022 0.198802069 0.199265271 0.199602619 0.199818164 0.19988738 0.199804336 0.199575648 0.199226201 0.198760316 0.198176041 0.197469041 0.196663737 0.195763707 0.194807976 0.193780839 0.192670494 0.191512421 0.190347329 0.189163074 0.187934101 0.18669489 0.185524568 0.184393182 0.18330805 0.182221234 0.181191772 0.180211589 0.179250255 0.178334072 0.177472234 0.176651523 0.175875187 0.175155416 0.17445448 0.173821822 0.173284382 0.172800094 0.172353417 0.171960905 0.171603993 0.171282455 0.170958266 0.170650244 0.170408174 0.170226514 0.170070872 0.169959366 0.169915691 0.169936001 0.170006722 0.170150608 0.17035529 0.170586511 0.170849621 0.171143606 0.171453372 0.171797022 0.172185928 0.17255871 0.172922105 0.173280686 0.173665747 0.174030945 0.17442596 0.174835682 0.175243154 0.175694734 0.176148906 0.176613539 0.177083462 0.17755869 0.178049818 0.178527147 0.178989902 0.179474279 0.179923832 0.180348188 0.18077454 0.181208551 0.181627169 0.182039946 0.182444438 0.182884872 0.18333219 0.183745369 0.184174344 0.184642166 0.185098082 0.185566336 0.186007529 0.186458722 0.186929673 0.187330097 0.187758625 0.18817766 0.188536763 0.188900694 0.189257398 0.189590871 0.189894944 0.190155253 0.190350518 0.190498471 0.190520391 0.190441817 0.190288559 0.190025434 0.189625472 0.189064473 0.188343897 0.187473953 0.186438069 0.185223386 0.183851659 0.182333559 0.180728823 0.179026827 0.177277103 0.175523937 0.173756033 0.172022611 0.170369789 0.168779418 0.167235881 0.165750027 0.164291963 0.162888393 0.161584333 0.160340905 0.159177333 0.158193052 0.157391801 0.156778723 0.156367928 0.156128645 0.15602693 0.156021565 0.15604277 0.156075969 0.156065732 0.155909404 0.155598223 0.155163616 0.154620543 0.153964207 0.153212145 0.15241012 0.151573732 0.150660142 0.149751738 0.148958743 0.148324534 0.147760779 0.147249788 0.146815941 0.146429062 0.146040156 0.145684421 0.145346552 0.145053983 0.144772857 0.144446701 0.144183502 0.143973708 0.143771559 0.143600792 0.143463597 0.143393651 0.14338766 0.143406093 0.143379033 0.143370718 0.143404663 0.143514156 0.143664375 0.143809319 0.143891186 0.143936694 0.143981084 0.143939793 0.143964887 0.144008383 0.143970504 0.143997699 0.144040599 0.144059807 0.144025028 0.143948495 0.143914074 0.143834651 0.143792883 0.143705368 0.143619418 0.143498287 0.143304884 0.143051624 0.142815858 0.142502457 0.142078325 0.141637564 0.14101994 0.140209302 0.139489844 0.138872385 0.13818197 0.137308851 0.136392772 0.135626107 0.134733364 0.133613706 0.13256149 0.131569043 0.130388305 0.129079387 0.127932459 0.126945853 0.12576361 0.124481328 0.123199336 0.122013815 0.120980509 0.119864292 0.118760973 0.117693 0.116608717 0.115501441 0.11439801 0.113375075 0.112225555 0.111218557 0.11034888 0.109437019 0.108620793 0.107726857 0.106908508 0.106492162 0.105867751 0.104954481 0.104591936 0.104546189 0.10411609 0.103668027 0.103677161 0.103628248 0.103500068 0.103535876
"30" 0.237785384 0.239919201 0.242063798 0.244183697 0.246339977 0.248496614 0.250670038 0.25282234 0.255076393 0.257321849 0.259510919 0.261714354 0.263908878 0.266175106 0.268430486 0.270626843 0.272763208 0.274885327 0.277066082 0.279279634 0.281593695 0.283837616 0.286110222 0.288374096 0.290631935 0.292807505 0.29500626 0.297274575 0.299495846 0.30171138 0.303903595 0.306085989 0.308259979 0.310381755 0.312519416 0.314611867 0.316610888 0.318744197 0.320746109 0.322806731 0.324830368 0.326823592 0.32867907 0.330635831 0.332553819 0.334396541 0.336254478 0.33810401 0.339878485 0.341681153 0.343343645 0.345093325 0.346709147 0.348356143 0.349975064 0.351520106 0.352923363 0.354293838 0.355674997 0.356977269 0.358305886 0.359716937 0.361002758 0.36238274 0.363646626 0.36493808 0.366211712 0.367528513 0.368875474 0.370263606 0.371557534 0.372863322 0.3742356 0.37537545 0.376598448 0.377607405 0.378782421 0.3799669 0.381151408 0.382320255 0.383501932 0.38460207 0.38562876 0.386583313 0.387464896 0.388272539 0.388948262 0.389543653 0.389960825 0.390442163 0.390812725 0.391124427 0.391420245 0.391642168 0.391887024 0.392009392 0.392322019 0.392473832 0.392618477 0.392803967 0.39306435 0.393418342 0.393770114 0.394262806 0.394887596 0.395424485 0.396160334 0.396755859 0.397422448 0.39819552 0.398870125 0.397776097 0.398546875 0.399282351 0.400030613 0.400730327 0.401452228 0.402232021 0.403095648 0.403841093 0.404610753 0.405368418 0.406170428 0.406962037 0.407741427 0.408514336 0.409280792 0.410058469 0.41082859 0.4115448 0.41229853 0.41305612 0.413820773 0.414557591 0.415336445 0.416121945 0.416872054 0.417639077 0.418426618 0.41923213 0.419997737 0.420739874 0.421481714 0.422198609 0.422930151 0.423655406 0.424398169 0.425056756 0.425723925 0.426356316 0.42694509 0.427489325 0.428021267 0.428586021 0.429032281 0.4294094 0.429817393 0.430181906 0.430482984 0.430761501 0.431022152 0.431230828 0.431395441 0.431502193 0.431558818 0.431563929 0.431502357 0.431350157 0.431161046 0.430891007 0.4305356 0.43004261 0.429454297 0.428732768 0.427824467 0.426766366 0.425535887 0.424085021 0.422482356 0.420733199 0.418815583 0.416763246 0.414577127 0.412312508 0.41005528 0.407751307 0.405472174 0.403266162 0.401192307 0.399228185 0.397349551 0.395604849 0.394018963 0.392570958 0.391237989 0.389974251 0.388763279 0.387581795 0.386466786 0.3853461 0.384207234 0.383116633 0.382084936 0.381131798 0.380225882 0.379444703 0.378769621 0.378200129 0.377750009 0.377447456 0.377252772 0.377154529 0.377181649 0.377321675 0.37759392 0.377995953 0.378504768 0.379165947 0.380000666 0.380939975 0.381973892 0.383073062 0.384210944 0.385360762 0.386506036 0.387613282 0.388686016 0.389726043 0.390747339 0.391699925 0.392616153 0.393456697 0.394227788 0.394935563 0.395579338 0.396156877 0.396690696 0.397200182 0.397647128 0.398048058 0.39841722 0.398743391 0.399022639 0.399290353 0.399564877 0.399866447 0.400195405 0.400557429 0.400921211 0.401333675 0.401787773 0.402261525 0.402749479 0.4032498 0.403715506 0.404136807 0.404505342 0.404817089 0.405062988 0.405224577 0.405299589 0.405249447 0.405089557 0.404817671 0.404424369 0.403921396 0.403224006 0.402374268 0.401427582 0.400341943 0.399094656 0.397690669 0.396166056 0.394526184 0.392730147 0.390834048 0.388870493 0.386830345 0.38473016 0.382550403 0.380329058 0.378027424 0.375701696 0.373386934 0.371089503 0.368822962 0.36660172 0.364407182 0.362275779 0.360211164 0.358230382 0.356359825 0.354604572 0.35297589 0.351455376 0.349991679 0.348536402 0.347024545 0.345404863 0.343603849 0.341544449 0.339235276 0.336674944 0.333801538 0.330604866 0.327097327 0.323298201 0.31918782 0.314814657 0.310226873 0.305475935 0.300588235 0.295601577 0.29059507 0.285647109 0.28079772 0.276089162 0.271607861 0.267407775 0.263507962 0.259882689 0.256575242 0.253618032 0.250998475 0.248660222 0.246611975 0.244874455 0.24341049 0.242164046 0.241133563 0.240311846 0.239658512 0.239127778 0.238706507 0.238360837 0.238074943 0.237822831 0.237589039 0.2373721 0.237161629 0.236952625 0.236762114 0.236624382 0.236546122 0.236529998 0.236599214 0.236741893 0.236966714 0.23726701 0.237612098 0.238019355 0.238470793 0.238962106 0.23949524 0.2400648 0.240660302 0.241286173 0.241940826 0.242618464 0.243317813 0.244036287 0.244771652 0.245539576 0.246317051 0.247066505 0.247822687 0.24858477 0.249333896 0.250063568 0.250756703 0.251425222 0.252054356 0.252627045 0.253165632 0.253673725 0.25414405 0.25458584 0.255016893 0.255442441 0.255863965 0.256261572 0.256655738 0.257058963 0.25744281 0.257816531 0.258207493 0.258602485 0.258995369 0.259374827 0.259733871 0.260080189 0.260438085 0.260787129 0.261107981 0.261444032 0.261778727 0.262108535 0.262442857 0.262788266 0.263136297 0.263513446 0.263947949 0.264426857 0.264963076 0.265563786 0.266230375 0.266978964 0.267778322 0.268644795 0.269554392 0.27048105 0.27145046 0.272421107 0.273380771 0.27435407 0.27532573 0.2762793 0.277230307 0.278138921 0.279009372 0.279889256 0.280716643 0.281506643 0.282270268 0.282980829 0.2836418 0.284257144 0.284820542 0.285343662 0.285816386 0.286212444 0.286543339 0.286802873 0.286980152 0.287052825 0.287049294 0.286970973 0.286806822 0.286559701 0.286253825 0.2859198 0.285547152 0.285170868 0.28481026 0.284474373 0.284146801 0.283799306 0.283439085 0.283060297 0.282630488 0.282153159 0.281631559 0.281058714 0.280440703 0.279775694 0.279063821 0.27832894 0.277574331 0.276823044 0.276090339 0.275374234 0.274687856 0.274019718 0.273352236 0.272715732 0.27204752 0.271310821 0.270526007 0.269731358 0.268994138 0.268321261 0.267766222 0.267334446 0.267020717 0.266849414 0.266784385 0.266797274 0.266855374 0.266910791 0.266919285 0.266861349 0.266726092 0.266534999 0.26629293 0.266001374 0.265702844 0.265395388 0.26502873 0.264638573 0.264275074 0.263913214 0.263583645 0.263313621 0.263097897 0.262921527 0.262786746 0.262695089 0.26261203 0.262548029 0.262500882 0.262488142 0.262497425 0.262516469 0.262571603 0.262688965 0.262833938 0.263005704 0.263195679 0.263376966 0.263606802 0.26384151 0.264065698 0.264271036 0.264457136 0.264655218 0.26483506 0.264995009 0.265162468 0.265341833 0.26552397 0.265743658 0.265937537 0.266145617 0.266428486 0.266749784 0.267081499 0.266549781 0.266952947 0.267391369 0.267870858 0.268344 0.268768221 0.269137457 0.269407183 0.269588798 0.269673184 0.269625291 0.269425288 0.269072652 0.26851964 0.26774317 0.266722381 0.265455872 0.263928682 0.262132004 0.260042846 0.25767751 0.254968919 0.251875594 0.248399802 0.24447763 0.24000676 0.234979831 0.229473516 0.223550431 0.217219062 0.210559145 0.203715809 0.196849003 0.190102652 0.183517821 0.177291371 0.171592057 0.166507021 0.161988728 0.15805041 0.154750429 0.152003668 0.149756409 0.147950977 0.146561794 0.145581216 0.144969128 0.14468547 0.144686751 0.144914314 0.145360827 0.146014228 0.146839842 0.147799119 0.148884647 0.15008989 0.151378274 0.152727313 0.154136412 0.155584596 0.157057278 0.158548146 0.160054192 0.161544614 0.163058683 0.164571211 0.166059203 0.1675414 0.169037186 0.17052263 0.172003575 0.173478134 0.174969807 0.176453874 0.177913986 0.179364249 0.180801839 0.182214938 0.183589354 0.184923477 0.186212197 0.187450849 0.18860162 0.189666249 0.190658808 0.191588126 0.192421779 0.193154782 0.193784848 0.194308974 0.194721349 0.195011459 0.195169427 0.195192732 0.195079401 0.194831729 0.194454014 0.193967327 0.193376303 0.192658283 0.19182498 0.190911859 0.18994502 0.188919403 0.187813148 0.186662853 0.185496204 0.184296735 0.183069952 0.181835353 0.180660918 0.179523237 0.178434052 0.177346542 0.17631644 0.17533052 0.17437695 0.173467621 0.172600538 0.171780154 0.17100998 0.170297198 0.169611819 0.168993562 0.168454096 0.167961299 0.167519458 0.167141594 0.166796617 0.166482225 0.166164115 0.165862873 0.165618122 0.165430576 0.165262379 0.165136434 0.165089935 0.165103279 0.165175848 0.165319599 0.165505916 0.165733099 0.16600728 0.166300416 0.166612439 0.166957848 0.167331427 0.167704947 0.168080777 0.168460712 0.168843627 0.169214226 0.169609353 0.170015357 0.170433991 0.170882523 0.171328269 0.171783373 0.172247782 0.172705181 0.173179157 0.173652321 0.17410434 0.174565025 0.174998157 0.175406121 0.175824955 0.176236637 0.176624306 0.177012779 0.177406594 0.177834898 0.178270765 0.178672336 0.179087885 0.1795367 0.179970346 0.180404618 0.180822067 0.181244507 0.181665756 0.182036005 0.182429902 0.182827145 0.183177456 0.183521502 0.183857322 0.184172012 0.18445769 0.184693746 0.184877999 0.185021587 0.185046211 0.184977181 0.18483521 0.184579283 0.184181303 0.183633417 0.182943225 0.18211741 0.181129046 0.179956242 0.178629436 0.177172564 0.175616987 0.17396269 0.172272794 0.17058304 0.168879203 0.167191207 0.165558502 0.164012849 0.162514403 0.161051989 0.159635887 0.158273816 0.156989515 0.15577282 0.154650584 0.153684027 0.152897835 0.152294487 0.15187756 0.15164417 0.151561238 0.151574507 0.151613615 0.151665352 0.151674807 0.151557676 0.151285931 0.15090429 0.150424384 0.149799824 0.149074912 0.148309559 0.147505879 0.146642976 0.14577134 0.144994214 0.144339561 0.143753529 0.143229373 0.142784111 0.142404735 0.142043032 0.141680904 0.141331322 0.141031854 0.14075017 0.140440278 0.140206032 0.140046388 0.139887638 0.139718622 0.139592215 0.139516912 0.139510661 0.139501721 0.139475733 0.139518738 0.139599979 0.139690228 0.139830008 0.139979057 0.14006108 0.140136607 0.140186064 0.140186667 0.140238479 0.140272021 0.140256159 0.140264757 0.140266702 0.140291043 0.140267611 0.140217818 0.140219167 0.140167482 0.140140213 0.140093319 0.140013978 0.139899515 0.139728129 0.139486864 0.139280625 0.139001071 0.138546519 0.13807261 0.137517691 0.136796907 0.136116348 0.135453783 0.134767331 0.133975305 0.133107029 0.132328972 0.13138672 0.130306885 0.129297368 0.128325514 0.127199188 0.125934489 0.124776162 0.12373475 0.122628912 0.121329859 0.120068919 0.119038716 0.118000545 0.11686084 0.115762979 0.114715673 0.113659777 0.112516258 0.111428257 0.110391822 0.109280434 0.10827085 0.107282326 0.106428143 0.105611369 0.104699194 0.103924993 0.103410043 0.1028351 0.10209614 0.10174039 0.101649173 0.101266302 0.100818876 0.10078245 0.10077611 0.10066298 0.100779578
"31" 0.259966969 0.262790859 0.265636653 0.268446624 0.271317661 0.274186075 0.277073443 0.279916495 0.282862663 0.285792202 0.288678586 0.291572332 0.294479042 0.297433674 0.300377697 0.303316295 0.306244105 0.309141338 0.312064648 0.3150132 0.318016499 0.320965201 0.32390213 0.326821625 0.329767674 0.332621127 0.33548215 0.338408709 0.34126839 0.344125271 0.346960068 0.349777877 0.352602035 0.355350286 0.358119577 0.360856831 0.363475323 0.3662121 0.368804604 0.371407092 0.373962164 0.37651819 0.37892285 0.38138476 0.383776218 0.386118025 0.388394237 0.390690625 0.392915249 0.395117462 0.397166133 0.399251014 0.401231945 0.403202683 0.405084044 0.406873435 0.408597857 0.410259396 0.411919385 0.413450629 0.414990127 0.416518867 0.417977035 0.419410318 0.420817703 0.422244221 0.423641622 0.425073296 0.426527828 0.428030223 0.429430515 0.430944175 0.432425976 0.433811545 0.435253412 0.436567664 0.43795526 0.43935591 0.440661877 0.441927761 0.443157941 0.444223106 0.445250571 0.446171492 0.446987152 0.44762525 0.448078156 0.448337257 0.448467612 0.448518664 0.448479146 0.448281378 0.448127717 0.447887182 0.447621882 0.447316021 0.4470945 0.446858585 0.446549714 0.446355492 0.446272969 0.446300507 0.446401238 0.446583986 0.447052479 0.447480977 0.448088765 0.448696643 0.449350119 0.450125545 0.450800091 0.44967863 0.450504512 0.451317102 0.452206463 0.453065813 0.453932315 0.454880774 0.455936044 0.456864059 0.457865119 0.458851963 0.459849805 0.460862458 0.461879432 0.46284914 0.463809758 0.46479103 0.465742409 0.4666394 0.467573822 0.468498886 0.469374865 0.470214367 0.471127123 0.472038805 0.472872227 0.473668844 0.474485934 0.475367367 0.476198375 0.476998538 0.477792501 0.47853902 0.479310751 0.480090797 0.480910838 0.481656611 0.482369453 0.483060688 0.483749568 0.48440221 0.485023022 0.485670179 0.486229777 0.486694276 0.487185448 0.487639755 0.488020003 0.488384813 0.488710344 0.48896879 0.489152193 0.489271045 0.48935023 0.489335358 0.48921299 0.488966018 0.488607436 0.488104135 0.4874461 0.486549735 0.485436559 0.484094918 0.482458949 0.480593264 0.478455961 0.475964785 0.473251909 0.470325232 0.467170238 0.463837147 0.46035251 0.456726968 0.453080922 0.449394703 0.445764154 0.442259908 0.438937604 0.435794055 0.43278724 0.430017054 0.427509636 0.425215811 0.423107117 0.421115339 0.419237137 0.417437434 0.415704012 0.413984567 0.412286639 0.410641968 0.409081072 0.407609522 0.406214565 0.40499717 0.403939635 0.403035909 0.402296603 0.401778907 0.401416421 0.401195019 0.401148379 0.401239514 0.401506245 0.40194428 0.402559876 0.403372973 0.40440172 0.405597359 0.406924158 0.408306718 0.409735024 0.411193311 0.412632465 0.414021581 0.415367097 0.416662037 0.417904019 0.419050306 0.420145929 0.421159267 0.422076702 0.422916442 0.423681617 0.424359679 0.424990475 0.425561756 0.426053703 0.426520437 0.426952422 0.427320689 0.427645981 0.427974254 0.428296536 0.428644776 0.429029197 0.429427236 0.42979601 0.430214524 0.430661738 0.43113786 0.431597084 0.432021499 0.432368934 0.432645291 0.432845414 0.432969749 0.432990968 0.432935774 0.432811767 0.432574064 0.432249457 0.431839079 0.431328535 0.430720001 0.429947793 0.429034352 0.427986264 0.426781029 0.42540139 0.423828632 0.422077149 0.420160294 0.418035716 0.415752292 0.413330466 0.410768956 0.408080161 0.405269623 0.402387857 0.399404228 0.396390349 0.393377304 0.390366912 0.387395144 0.384494096 0.381637841 0.378844291 0.376127452 0.373504013 0.371004581 0.368645936 0.366442502 0.364364803 0.36234796 0.36032778 0.358256161 0.356072664 0.353663146 0.350970209 0.347983778 0.344672203 0.340973109 0.336878538 0.332441926 0.327677459 0.322554529 0.317158192 0.311544836 0.305776 0.299883068 0.293902099 0.287948072 0.282107085 0.276410311 0.270901203 0.265684456 0.260805845 0.256282985 0.252103508 0.248303965 0.244918808 0.241927475 0.239256337 0.23691377 0.234929219 0.23325561 0.231823519 0.230633497 0.22967574 0.228903353 0.228272468 0.227766424 0.227347821 0.227001965 0.226696327 0.226421013 0.226189777 0.225980699 0.225774437 0.225596219 0.225482315 0.225439236 0.225465566 0.225584313 0.225791708 0.226085499 0.226463467 0.226905674 0.227410689 0.227960348 0.22854954 0.229183018 0.229847029 0.230536744 0.231245264 0.231974199 0.232733786 0.233504981 0.234284878 0.235083878 0.235910848 0.236738294 0.2375554 0.238378242 0.239204824 0.24000591 0.240787715 0.241542503 0.242265448 0.242948472 0.243574664 0.244164705 0.244719431 0.24523513 0.245713413 0.246181875 0.246642098 0.247093275 0.247523516 0.2479489 0.24837321 0.248770833 0.249173969 0.249598801 0.250020027 0.250436306 0.250849903 0.251247823 0.251622677 0.252006918 0.252375752 0.25272432 0.253076255 0.253422141 0.253757507 0.254099727 0.254460126 0.254839331 0.255243897 0.255691558 0.256195158 0.256759495 0.257384211 0.25808394 0.258861959 0.259688109 0.26058498 0.261528045 0.262501419 0.263509989 0.264517784 0.265515149 0.26652199 0.267520398 0.268509805 0.269491047 0.270429701 0.271336436 0.272234738 0.273099363 0.273938596 0.274715185 0.275425851 0.27610454 0.276742756 0.277319998 0.277841449 0.278304398 0.278668106 0.278940618 0.279119462 0.279217333 0.279211968 0.279108435 0.278899074 0.278598666 0.278209329 0.277750999 0.277268469 0.276751816 0.276256204 0.275810361 0.275409877 0.275028229 0.274660259 0.274314404 0.273970604 0.273584664 0.273148566 0.27266264 0.272102654 0.271475554 0.270780802 0.270029455 0.269260645 0.268476933 0.267691344 0.266913861 0.266159564 0.265421718 0.264689445 0.263964057 0.263249576 0.262492925 0.261668324 0.260810733 0.259959072 0.25915122 0.258416086 0.257796198 0.257303417 0.256962985 0.256780624 0.256703466 0.256696463 0.256748557 0.256795496 0.256802171 0.256749183 0.256596595 0.256380796 0.256111085 0.255769312 0.255415827 0.255045563 0.254622966 0.254189432 0.253778815 0.253356308 0.252972364 0.252669603 0.252426773 0.252238423 0.252105236 0.251983762 0.251881987 0.251820922 0.251770884 0.25174132 0.25174126 0.251785159 0.251862168 0.251996487 0.252180129 0.252373397 0.252576709 0.252806485 0.253091246 0.25337702 0.253641337 0.253912777 0.254153281 0.25437957 0.254612923 0.254796863 0.254960269 0.255144656 0.255352378 0.25559485 0.255803376 0.256031424 0.256317914 0.256612033 0.256914079 0.256387174 0.256835073 0.257312566 0.257829934 0.25833267 0.258785367 0.259175688 0.259464175 0.259657502 0.259712994 0.259606749 0.259352058 0.258943468 0.258273453 0.25734812 0.256196618 0.254795045 0.253071785 0.251032084 0.248638153 0.245922893 0.242813483 0.239267141 0.235323861 0.230910569 0.225938305 0.220365673 0.214288965 0.207795396 0.200894356 0.193667352 0.186280161 0.17889379 0.171649307 0.164606363 0.157956675 0.151883885 0.146461934 0.141651377 0.137492299 0.133991987 0.13105759 0.128670514 0.126773611 0.125265196 0.124166131 0.123489477 0.123169214 0.123132266 0.123359285 0.123802945 0.124439597 0.125264168 0.12622875 0.127334893 0.128587574 0.129935145 0.131355971 0.132815182 0.134313881 0.135837018 0.137388572 0.138949692 0.140498951 0.142078072 0.143661633 0.145210415 0.146768391 0.148345679 0.149925023 0.151496798 0.153063312 0.154616624 0.156176239 0.157742143 0.15928857 0.160831422 0.162371293 0.163846195 0.165280551 0.166690543 0.168077677 0.169368103 0.170577958 0.171721205 0.172789872 0.173781157 0.174673721 0.175447121 0.176118314 0.176692992 0.177121818 0.177410722 0.177564591 0.177582771 0.177463919 0.177207515 0.176836878 0.17637156 0.17578879 0.175091356 0.174291551 0.173442647 0.172553331 0.171569824 0.170542002 0.169486061 0.168399438 0.16728124 0.166151419 0.165059224 0.163994819 0.162960783 0.161935568 0.160967618 0.16006352 0.159163579 0.158300847 0.157481477 0.156672746 0.155911505 0.155224442 0.154599726 0.154053926 0.153566495 0.153116554 0.152699739 0.152349338 0.152018756 0.151716664 0.151400954 0.151128739 0.150880635 0.150653005 0.150467753 0.150345027 0.150279939 0.150272444 0.150327265 0.150410116 0.150531396 0.150691226 0.150904179 0.15113917 0.151376158 0.151655108 0.151937231 0.15222697 0.152513996 0.152833611 0.153160974 0.153496355 0.153859481 0.154265612 0.15467675 0.155099273 0.155568585 0.156065404 0.156586796 0.157116219 0.157635331 0.158163726 0.158689573 0.159209311 0.159751266 0.160286754 0.160816595 0.16133149 0.161807507 0.162273556 0.16273734 0.163231447 0.163742393 0.164230004 0.16473195 0.165243715 0.165712193 0.166171223 0.166633517 0.167141363 0.167620271 0.168049395 0.168481648 0.168922529 0.169350341 0.169739619 0.170128569 0.170511141 0.170834705 0.171100348 0.171301827 0.171443611 0.171490461 0.171421856 0.171243176 0.170973599 0.170541182 0.169937953 0.16918847 0.168315336 0.167280018 0.166061357 0.164700434 0.163243458 0.161676303 0.160004854 0.158267677 0.156551585 0.154899359 0.15324837 0.151661515 0.150173277 0.148730233 0.147342309 0.145992324 0.14466542 0.143411845 0.142278671 0.141249642 0.14034009 0.139567077 0.138976678 0.138572246 0.138340518 0.138256475 0.138233349 0.138219774 0.138212085 0.1381827 0.138038859 0.137729913 0.137310997 0.136769369 0.1360569 0.135301262 0.134525388 0.133687332 0.132804096 0.131931141 0.131176189 0.130545318 0.130034298 0.12956591 0.12921384 0.128959805 0.128722668 0.128445774 0.128121868 0.127815142 0.127559349 0.127240866 0.126959205 0.126773283 0.126607388 0.12640208 0.126256868 0.126161397 0.126069501 0.125924885 0.125846922 0.125950709 0.126080751 0.126119569 0.126172736 0.126285732 0.126387253 0.126437098 0.126457676 0.126468405 0.126477823 0.126488596 0.126460582 0.126406446 0.126357853 0.126343921 0.126279101 0.126244456 0.126255408 0.126219064 0.12612763 0.126082376 0.126018167 0.125857905 0.125651538 0.125471517 0.125270247 0.124890044 0.124372154 0.123887762 0.123369664 0.122639857 0.121898174 0.121346965 0.12064983 0.119733438 0.118813746 0.117941804 0.117027454 0.11604362 0.115126424 0.114037029 0.112875864 0.111734882 0.110521451 0.109468348 0.108445227 0.107278123 0.106105804 0.105053641 0.104044743 0.102921635 0.101750836 0.100751318 0.099767864 0.098718531 0.09758874 0.096614026 0.095603421 0.094439611 0.093419597 0.092803501 0.092130013 0.091203935 0.090381116 0.089812353 0.089294925 0.088666528 0.08815226 0.08778771 0.087605715 0.087323017 0.087148063 0.087158263 0.087133795 0.087249368
"32" 0.242517352 0.245017365 0.247532859 0.250076592 0.252676159 0.25525263 0.25784567 0.260410517 0.263113111 0.265765399 0.268419594 0.271040201 0.273706615 0.276437193 0.279180646 0.281876236 0.284552038 0.287232041 0.290005475 0.292702436 0.295514822 0.298282802 0.301036358 0.303786099 0.306546241 0.309233457 0.311953515 0.314730227 0.31747371 0.320178211 0.322883576 0.325585485 0.328283012 0.330950737 0.333632231 0.336261153 0.338846445 0.341460139 0.343966365 0.346517742 0.349009782 0.35149464 0.353890806 0.356294632 0.358675092 0.361012131 0.363224417 0.365538508 0.367723614 0.369922936 0.371976584 0.374105185 0.376095891 0.378111094 0.379977614 0.381833434 0.383607745 0.385330617 0.387002766 0.388622493 0.390181839 0.391750902 0.393285483 0.394821137 0.396308959 0.397785604 0.39921999 0.400723457 0.402183354 0.403686732 0.405164987 0.406667471 0.408239156 0.409676701 0.411161959 0.412423342 0.413854569 0.415267944 0.416529149 0.417891949 0.41906485 0.420199811 0.421278208 0.42223832 0.423039824 0.423837602 0.424296975 0.424698174 0.424855143 0.424979001 0.425074309 0.42501536 0.424928844 0.424840897 0.424649119 0.42442131 0.424294919 0.424118608 0.424031228 0.423852384 0.423792183 0.423925757 0.424134582 0.424438775 0.424977154 0.425391853 0.426080257 0.426748008 0.427342594 0.428165138 0.428900957 0.427706033 0.428566158 0.429407209 0.430307269 0.431196421 0.432111025 0.433051348 0.434089601 0.435007513 0.435971916 0.436965644 0.438001335 0.439021081 0.440003037 0.440952748 0.441969037 0.442953825 0.443884045 0.444767833 0.445713192 0.446611583 0.447473735 0.448300958 0.449197978 0.450050086 0.450874031 0.451687992 0.452525944 0.453380108 0.45418638 0.454986066 0.455741793 0.456495225 0.457252651 0.458032727 0.458805382 0.459521234 0.460235894 0.460954428 0.461648643 0.462304413 0.462943673 0.463603556 0.464169353 0.464653164 0.465169311 0.465640217 0.466050237 0.466433585 0.466758519 0.467010468 0.46721974 0.467371404 0.467447281 0.46744144 0.467330515 0.467105091 0.466768116 0.466268092 0.465635449 0.464789927 0.463738322 0.462467015 0.460889637 0.459079713 0.457006395 0.45458141 0.451939672 0.449124336 0.446079642 0.44284597 0.439452767 0.435957432 0.432451934 0.42889449 0.425391436 0.422013789 0.418819189 0.415825814 0.413008541 0.410401851 0.408020765 0.405872226 0.403909564 0.402055144 0.400291085 0.398601472 0.397001147 0.395404965 0.393825948 0.39231059 0.390849799 0.389465034 0.388156533 0.387003899 0.38599363 0.3851282 0.384415179 0.383889347 0.38350302 0.383280605 0.383220047 0.383275211 0.38350597 0.383895576 0.384432137 0.385171413 0.386113107 0.387188911 0.388393193 0.389693141 0.391031891 0.392367959 0.393694311 0.394999057 0.39626199 0.397486806 0.398680449 0.399802685 0.400854975 0.401838332 0.402737141 0.403551698 0.404286623 0.404946119 0.40554142 0.406104714 0.406618029 0.407076538 0.407486737 0.407856137 0.408187479 0.408516347 0.408853352 0.409203947 0.409569055 0.409961939 0.410357833 0.410787165 0.411232084 0.411666989 0.412093163 0.412502676 0.41282621 0.41307658 0.413270175 0.413391352 0.413404286 0.413326025 0.413183719 0.41294241 0.412613422 0.412216157 0.411738038 0.411174268 0.410434395 0.409568936 0.408603609 0.407487452 0.406195432 0.404721469 0.403067321 0.401248872 0.39922902 0.397024304 0.394686371 0.392223448 0.389614016 0.386888742 0.384093404 0.381211668 0.37829715 0.375377506 0.372472227 0.369599223 0.366766572 0.363961101 0.361226499 0.358569294 0.356015265 0.353602082 0.351319909 0.349176705 0.347167253 0.345216066 0.343266666 0.341284156 0.339180082 0.336864293 0.334268689 0.331376076 0.328174591 0.324595183 0.320645273 0.316373497 0.311790526 0.306877971 0.301705301 0.296333462 0.290820003 0.28521508 0.279551119 0.273919523 0.268400937 0.26303941 0.257891148 0.253026903 0.248498961 0.244326234 0.2404892 0.237005383 0.23391065 0.231189609 0.228783235 0.226684868 0.224905759 0.223414972 0.222157463 0.221111298 0.220274329 0.219607189 0.219061464 0.218621656 0.218264952 0.217973188 0.217709571 0.217468843 0.217262223 0.217066914 0.216870815 0.216706738 0.216592878 0.216545761 0.216569543 0.216682017 0.216876626 0.217153355 0.217516661 0.217932075 0.218408346 0.218933269 0.219494253 0.220089108 0.220717758 0.221376747 0.222067356 0.222773805 0.223491803 0.224226788 0.224982113 0.225753397 0.22655353 0.227342635 0.228119805 0.228908449 0.229699597 0.230495214 0.231269419 0.231988654 0.23267664 0.233326823 0.233913615 0.234472245 0.235006034 0.235499784 0.235957623 0.23641707 0.236852795 0.237273589 0.237673968 0.23807849 0.238490388 0.238886088 0.239281595 0.239686191 0.240082875 0.240477636 0.240879521 0.241261959 0.241625085 0.242006227 0.242384285 0.242743567 0.243084878 0.243409321 0.243743792 0.244089916 0.244441435 0.244803295 0.245205328 0.245650917 0.246142581 0.246688664 0.247291967 0.247976348 0.248741671 0.24954024 0.250411272 0.251330644 0.252277553 0.253256798 0.254241318 0.255224288 0.256210804 0.257193416 0.2581608 0.259129792 0.260054022 0.260938883 0.261833221 0.262683779 0.263497055 0.264264435 0.264987946 0.2656762 0.266299635 0.26685375 0.267365754 0.267826349 0.268195361 0.268479347 0.268671572 0.268775344 0.268785179 0.268694639 0.26850608 0.268226475 0.267865837 0.267443091 0.266995698 0.266528547 0.266064584 0.265648961 0.265295565 0.264967412 0.264646202 0.264346838 0.264047921 0.263716757 0.26335749 0.262942374 0.262462258 0.261916965 0.261309773 0.260657996 0.259978354 0.259262174 0.258531392 0.257815927 0.257110298 0.256428272 0.255746543 0.255058825 0.254392087 0.253680527 0.25290969 0.252092153 0.251267999 0.250501961 0.249827817 0.249279395 0.248852879 0.248536631 0.24836421 0.248305008 0.248299778 0.248343766 0.248360261 0.248307094 0.248195976 0.247987434 0.247716784 0.247413129 0.247057512 0.246672973 0.246269822 0.245836645 0.245367929 0.244923964 0.244481802 0.244061694 0.243707523 0.243409187 0.243157074 0.242953897 0.242779702 0.242629752 0.242518023 0.242419839 0.242358029 0.242338687 0.242353261 0.242379904 0.242479727 0.242619514 0.24275209 0.242918581 0.243111223 0.243333653 0.243574634 0.243816793 0.244037196 0.24421002 0.244383991 0.244575873 0.244722605 0.244864538 0.245028213 0.245201632 0.245396286 0.245557129 0.245721281 0.245940417 0.246183515 0.246443242 0.245978132 0.246393993 0.24684222 0.247319847 0.247781217 0.24821876 0.248599261 0.248879254 0.249060005 0.249094948 0.2489492 0.248659074 0.248203158 0.247532815 0.246634394 0.245476514 0.244053349 0.242332742 0.2403166 0.237987235 0.235343322 0.232317239 0.228868902 0.225037709 0.220763177 0.21596323 0.210596621 0.204788029 0.198613241 0.192079991 0.185276166 0.178394884 0.171557516 0.164899766 0.158463225 0.152456403 0.146986127 0.142147645 0.137913346 0.134250671 0.131181091 0.128638715 0.126588568 0.1249571 0.123690195 0.122771718 0.122200087 0.121924452 0.121920712 0.122142307 0.122544199 0.123155057 0.12392807 0.124809712 0.125825271 0.126977667 0.128189862 0.129458591 0.130785435 0.132170871 0.133602768 0.135028765 0.136462077 0.137927353 0.139404312 0.140864596 0.142306104 0.1437466 0.145208403 0.146685123 0.148157626 0.149613723 0.151076496 0.152547181 0.153999254 0.155420259 0.156834096 0.158260047 0.159662917 0.161025658 0.162333563 0.163601398 0.164808378 0.165962636 0.167031959 0.168011516 0.168893695 0.169689491 0.170415983 0.171040252 0.17154105 0.171940491 0.172226578 0.172370195 0.172381848 0.172280967 0.172033995 0.171681806 0.171229571 0.170678854 0.170010626 0.169266164 0.168482348 0.167637393 0.166716993 0.165736407 0.164732307 0.163689658 0.162623778 0.161560416 0.160533249 0.159523875 0.158543378 0.157574415 0.156656861 0.155776605 0.154917836 0.154060423 0.153237283 0.152466774 0.15174751 0.151082411 0.150460914 0.149938852 0.149459198 0.149007574 0.148610309 0.148271784 0.147974744 0.147716239 0.147453278 0.147179872 0.146944612 0.146793425 0.146678314 0.146591246 0.146570653 0.14658919 0.14665316 0.146791339 0.146981165 0.147185057 0.147427976 0.147718713 0.148038238 0.14838028 0.148723871 0.149063677 0.149398193 0.149744153 0.150116801 0.150505111 0.150876805 0.151287943 0.151756555 0.152213395 0.15266706 0.153149933 0.1536818 0.154182389 0.15463908 0.155152887 0.155663237 0.156148553 0.156650975 0.157148927 0.157633811 0.158082142 0.158515111 0.158946559 0.159382731 0.159811556 0.160263613 0.16071713 0.161165923 0.16165112 0.162084877 0.162488192 0.162919104 0.163352624 0.163743004 0.164105698 0.164516687 0.164922774 0.165282875 0.165646881 0.16600655 0.166312993 0.166585714 0.166825607 0.16701059 0.167112827 0.167083904 0.166963398 0.166754797 0.166419983 0.165959567 0.165361911 0.164644212 0.163788527 0.162776053 0.161606148 0.160317704 0.158896983 0.15741235 0.155829579 0.154197574 0.152595744 0.151004881 0.149459407 0.14795652 0.146553054 0.145226344 0.143917978 0.142607123 0.141374335 0.140237838 0.139181018 0.138231799 0.137422621 0.136747956 0.136233896 0.13589716 0.135732636 0.135717988 0.13572818 0.135762095 0.135854527 0.135893464 0.135783598 0.135532454 0.135161981 0.134675443 0.134047076 0.133365557 0.132612839 0.131791249 0.130968496 0.130151063 0.129404917 0.128797948 0.128270581 0.12779443 0.127374351 0.127050132 0.126801878 0.12651971 0.126216397 0.125917703 0.125571907 0.125262097 0.125037625 0.124891795 0.12473429 0.12456426 0.124447569 0.12439467 0.124330148 0.124225803 0.124145396 0.124194004 0.124290437 0.124324031 0.124349445 0.124415934 0.124475628 0.124493562 0.124476008 0.124427527 0.124486357 0.124481142 0.124368526 0.124314874 0.124286026 0.124283634 0.124203533 0.124120519 0.12407729 0.123994887 0.123974718 0.123921208 0.123889886 0.123761237 0.123648778 0.123492047 0.123228915 0.122893929 0.12245135 0.121984325 0.121491253 0.120870471 0.120277137 0.119625285 0.118922099 0.118159153 0.117360316 0.116643131 0.115819268 0.114804685 0.113790035 0.112810053 0.111838013 0.110899806 0.10988389 0.108863033 0.107796453 0.106636651 0.105552018 0.104775831 0.103878886 0.102779403 0.101757571 0.100796916 0.099853404 0.098935246 0.09801285 0.097064406 0.096116349 0.095109731 0.094278306 0.093724743 0.092948377 0.092074379 0.091482699 0.090967014 0.090383038 0.089730918 0.089426607 0.089324802 0.088986158 0.088718325 0.088623375 0.088398695 0.088283941 0.088518761
"33" 0.251080781 0.253773302 0.256491631 0.259160012 0.261903524 0.264646858 0.267396778 0.270111799 0.272938251 0.27574265 0.278544962 0.28131181 0.284104317 0.286918938 0.289773703 0.292605758 0.295360625 0.298125446 0.300974578 0.303764135 0.30665791 0.309444338 0.312288433 0.315103292 0.317907304 0.32064876 0.323421568 0.326205045 0.328931838 0.331670374 0.33435595 0.337093115 0.339799076 0.342457354 0.345097929 0.347753108 0.350239247 0.352847248 0.355347037 0.357834727 0.360311806 0.36273554 0.365069002 0.36737296 0.369695067 0.371933371 0.374079078 0.376289517 0.378376186 0.380465508 0.382453442 0.384447008 0.386313409 0.388164133 0.38996017 0.391697049 0.393307418 0.39487803 0.396399915 0.397814572 0.399216235 0.400678843 0.402038217 0.403391093 0.40470323 0.406006575 0.407328188 0.408643275 0.409947604 0.411401242 0.412740082 0.414091945 0.415576696 0.416846842 0.418222547 0.419405192 0.420713484 0.42203483 0.423225343 0.424444675 0.425583512 0.426585793 0.42753908 0.428380966 0.429073185 0.429617941 0.42998445 0.430217713 0.430237085 0.430255383 0.430138618 0.429958463 0.42967242 0.429353714 0.429054052 0.428644985 0.428405076 0.428070039 0.427848309 0.427503645 0.42732355 0.427452117 0.427414417 0.427596331 0.428004205 0.428354025 0.429016292 0.429529339 0.430037677 0.430715352 0.431518078 0.430371225 0.431139112 0.431908011 0.432725966 0.433489203 0.43422845 0.435069084 0.43603456 0.436854422 0.437742978 0.438596487 0.439531267 0.440468192 0.441333443 0.442223579 0.443118155 0.4440189 0.444904327 0.445745587 0.446648419 0.447526962 0.448418796 0.449212134 0.450060129 0.450928658 0.45176059 0.452590585 0.453437179 0.454298377 0.455115288 0.455895573 0.456628501 0.457313001 0.458054245 0.458811253 0.459543794 0.460164875 0.460824996 0.461483508 0.46204704 0.462572366 0.463114023 0.463680416 0.464119494 0.464446068 0.464799106 0.465114504 0.465366542 0.465599239 0.465788662 0.465904474 0.465969801 0.465961456 0.465894043 0.465744227 0.465511084 0.465171784 0.464725405 0.464138031 0.463408202 0.462466002 0.461314827 0.459951878 0.458310425 0.456431985 0.454303235 0.4518691 0.449215621 0.4463467 0.44329381 0.440065652 0.436675698 0.433176041 0.429664731 0.426125467 0.422616065 0.41923371 0.416041434 0.413034916 0.410198152 0.407575786 0.405185759 0.403036475 0.401054114 0.399168998 0.397393376 0.395710319 0.394094467 0.392475426 0.390858442 0.389329165 0.387863964 0.386480689 0.385157496 0.383971334 0.382965386 0.382102787 0.381389022 0.380866766 0.380499572 0.380269855 0.380200148 0.380251497 0.380473197 0.380863667 0.381404638 0.382126719 0.383041322 0.384107172 0.385298193 0.38656643 0.387879878 0.389214963 0.390541881 0.391833961 0.393082201 0.394284815 0.395456165 0.396554857 0.397591203 0.398556352 0.399439484 0.400217772 0.400912821 0.401541054 0.402136028 0.40268895 0.40316534 0.403583854 0.403977633 0.404322684 0.404619336 0.404904842 0.405188411 0.405493021 0.405827075 0.406197727 0.406582206 0.407022834 0.407492101 0.407996476 0.408517778 0.409017235 0.409441948 0.409815133 0.410105467 0.410302639 0.410377353 0.410333157 0.41019085 0.409927934 0.409534395 0.409015536 0.40838033 0.407636821 0.406706005 0.405620217 0.40439409 0.403015971 0.401485026 0.399776638 0.397917271 0.395912558 0.393710852 0.391373247 0.388941437 0.386389792 0.383721143 0.380955368 0.378151417 0.375266314 0.372357309 0.369472057 0.366621971 0.363817602 0.361058176 0.358340442 0.355693042 0.353121281 0.350654274 0.348319173 0.346104562 0.344021767 0.342070907 0.340199083 0.338332951 0.336421967 0.334392905 0.332146853 0.329606831 0.326765954 0.323623955 0.32010138 0.316179872 0.31192416 0.307337314 0.302379429 0.297156155 0.291720212 0.286134124 0.280439913 0.27467069 0.268926859 0.263282657 0.257788688 0.252508044 0.247515112 0.242858738 0.238557711 0.234572858 0.230950162 0.227724716 0.224871904 0.222332984 0.220116615 0.218241632 0.216663256 0.215325326 0.21421665 0.213319287 0.212599263 0.212008089 0.211527199 0.211137727 0.210819274 0.210531294 0.210275665 0.210050523 0.209833235 0.20963183 0.209455371 0.209320128 0.209249914 0.209254682 0.209352016 0.209532648 0.209794343 0.210134208 0.210539818 0.211001351 0.21151115 0.212062463 0.212661088 0.213292524 0.213947624 0.214641228 0.215362906 0.216100439 0.216856837 0.217625111 0.218415186 0.219231635 0.220047295 0.220842332 0.221642092 0.222449228 0.223240912 0.22400932 0.224737763 0.225442857 0.226110309 0.226720184 0.227287263 0.227822959 0.228326112 0.228793949 0.229256883 0.229705006 0.23014982 0.230568707 0.230983436 0.231415153 0.231827363 0.232233614 0.232653439 0.233069658 0.233488962 0.233898818 0.23429586 0.234672487 0.23505713 0.235422492 0.235772222 0.236125007 0.236467049 0.236804366 0.237140074 0.237484306 0.237848178 0.238249257 0.238674492 0.239147261 0.239703462 0.240313455 0.240992442 0.241758019 0.242588609 0.243484408 0.244424328 0.24539353 0.246410623 0.247432813 0.248439729 0.249460876 0.250468493 0.251459688 0.252446026 0.253393233 0.254304886 0.255211264 0.256077647 0.256909907 0.257695854 0.258424044 0.259104997 0.259740144 0.260331571 0.260854781 0.261313826 0.261688203 0.261969805 0.262160987 0.262270838 0.262282789 0.26218304 0.261987925 0.261701792 0.261330009 0.260878354 0.26039362 0.25990954 0.259441704 0.259023726 0.258651286 0.258313626 0.257993966 0.257678717 0.25735867 0.257020712 0.25665611 0.256260186 0.255801678 0.255279005 0.254702151 0.25406459 0.253400922 0.252705395 0.251997143 0.251304388 0.250627428 0.249954849 0.249285951 0.248609021 0.247933477 0.247223496 0.246448293 0.24563697 0.244824022 0.244066775 0.243395746 0.242850199 0.242423922 0.242134094 0.242000163 0.241949707 0.241952881 0.242000476 0.242047265 0.242044985 0.241955757 0.241771355 0.241535887 0.241250694 0.24090533 0.240551278 0.240170985 0.239750415 0.239298344 0.238840088 0.238410443 0.238027424 0.237698942 0.237419516 0.237191156 0.237011939 0.236861318 0.236719072 0.236610278 0.236538112 0.236501142 0.236479566 0.236485958 0.236548811 0.236671552 0.23683393 0.237040207 0.237251431 0.237468392 0.23773773 0.23799783 0.238254189 0.238518536 0.238748521 0.238960877 0.2391752 0.23933278 0.239481568 0.23967053 0.23985979 0.240073279 0.240294218 0.24052164 0.240786269 0.241100162 0.241400167 0.240878507 0.241312921 0.241781577 0.242259175 0.242714122 0.243110597 0.243457958 0.243720204 0.243894219 0.243924111 0.243796319 0.24352853 0.243104741 0.24247025 0.241590813 0.240480661 0.239112645 0.237407103 0.235407963 0.233086199 0.230452761 0.227438912 0.224011838 0.22016792 0.215904146 0.211120024 0.205760047 0.199933127 0.193743259 0.18718338 0.180374965 0.173453674 0.166575268 0.159877956 0.153411612 0.147350222 0.141801864 0.136889338 0.132567644 0.128808424 0.12565425 0.123030178 0.120912269 0.119199619 0.11785531 0.11688967 0.116270192 0.11596749 0.115943342 0.11614351 0.116552539 0.117166266 0.117930807 0.118811049 0.119825691 0.120963767 0.122190051 0.123473093 0.124803945 0.126199469 0.127641678 0.129079968 0.13052927 0.131972939 0.13341634 0.134864017 0.136287883 0.137726247 0.139197022 0.140660822 0.142122626 0.143603459 0.145068213 0.14652656 0.147999123 0.149428159 0.150861993 0.15231517 0.153707087 0.15506196 0.156368092 0.157623544 0.158819795 0.159960121 0.161033049 0.162029862 0.162952632 0.163773865 0.164466321 0.165079966 0.165617913 0.166031688 0.166303024 0.166432247 0.166434601 0.166325748 0.166098297 0.165764734 0.16531761 0.164757431 0.164104432 0.163362786 0.162553132 0.161691368 0.160763428 0.159786314 0.158774421 0.157734752 0.156664342 0.155593961 0.154548466 0.153522074 0.152516693 0.151525438 0.150570869 0.149670765 0.148790449 0.147914439 0.147080511 0.146320567 0.145629883 0.14493756 0.144295961 0.143782824 0.143280089 0.142821833 0.142452329 0.142138794 0.141834795 0.141542032 0.141241699 0.14098838 0.140812755 0.140671119 0.14050135 0.140381634 0.140356362 0.140359983 0.140432656 0.140586168 0.140760839 0.140950754 0.141166314 0.141407847 0.141660988 0.141960084 0.142266825 0.14257215 0.142868668 0.143210977 0.143571898 0.143932045 0.144326776 0.144745216 0.145195082 0.145679906 0.14618203 0.1467022 0.147214055 0.147737473 0.148267254 0.148804456 0.149337694 0.149861008 0.150370657 0.150868282 0.15137513 0.151862547 0.152300894 0.152734205 0.153166562 0.153632075 0.154110804 0.154572174 0.155007705 0.155465454 0.155907959 0.156314969 0.156725466 0.157154977 0.157583281 0.157955736 0.158315063 0.158709347 0.15909031 0.159434572 0.159792826 0.16009742 0.160354793 0.160563588 0.160708874 0.16080223 0.160753191 0.16062893 0.160439149 0.160094365 0.159588382 0.158924788 0.158152089 0.157262385 0.156212717 0.15495728 0.153619304 0.152186245 0.150643557 0.149037495 0.147418022 0.145835444 0.144256756 0.142684773 0.141187936 0.139801815 0.138458103 0.137145072 0.135864154 0.134658486 0.133567214 0.132512927 0.131551623 0.130759209 0.13012135 0.129608512 0.129287437 0.129171163 0.129138172 0.129188523 0.129258081 0.12929751 0.129356951 0.129294276 0.129099339 0.128783971 0.128295228 0.127677396 0.127018139 0.126272976 0.125479624 0.124639452 0.123801291 0.123074844 0.122454062 0.121901289 0.121410973 0.121039599 0.120743603 0.120447524 0.120141111 0.119829826 0.119553037 0.119262993 0.118946321 0.118711121 0.118554264 0.118399531 0.11826691 0.118191473 0.118155286 0.118093885 0.118015818 0.11795868 0.117943913 0.118020616 0.118078448 0.118138202 0.118203767 0.118236542 0.118255615 0.118246093 0.118218683 0.118218921 0.118251994 0.118239082 0.118221827 0.118207715 0.118168354 0.118176341 0.118250221 0.118230164 0.118161097 0.118129052 0.118080296 0.118003555 0.117850468 0.117773592 0.117677093 0.117437676 0.117052235 0.116675667 0.116317078 0.115791917 0.115168892 0.114590853 0.114020646 0.113286413 0.112499736 0.111773707 0.111022092 0.110205054 0.109203644 0.108215921 0.107359491 0.106391877 0.10528408 0.10424529 0.103376463 0.102444805 0.101319052 0.100261129 0.099396013 0.098418295 0.097377203 0.096378863 0.095417202 0.094542444 0.093551651 0.092555366 0.091646567 0.090814143 0.089911431 0.088948451 0.088180721 0.087697521 0.087062553 0.08629673 0.085765921 0.08527571 0.084616944 0.084144913 0.083930433 0.083670676 0.083532281 0.083503433 0.083377995 0.08303722 0.082982123
"34" 0.242514431 0.245492995 0.248492137 0.251500338 0.254546285 0.257605672 0.26066795 0.263737589 0.266858459 0.269990891 0.273141176 0.276231974 0.2793625 0.282556355 0.285753548 0.288897604 0.292041063 0.29517594 0.298384815 0.301563799 0.304796338 0.307972759 0.31118235 0.314379692 0.317595035 0.320710719 0.323843062 0.327047735 0.330184847 0.33329761 0.336410195 0.339505523 0.342590928 0.345639884 0.348694891 0.351691097 0.354625344 0.357633561 0.36047858 0.363376856 0.366226852 0.369032085 0.371729404 0.374493212 0.377167434 0.379825652 0.382374257 0.384954631 0.387414992 0.389907002 0.392264128 0.394644678 0.396872163 0.399159193 0.401328564 0.403416306 0.405382514 0.407317013 0.409226984 0.411039561 0.412782699 0.414613366 0.416310281 0.418073237 0.41969651 0.421358436 0.423015863 0.424659133 0.426281452 0.428047895 0.429671109 0.431313246 0.433072835 0.434610784 0.43628487 0.437719405 0.439301103 0.440904796 0.442367077 0.443805248 0.445228368 0.446523488 0.447706878 0.448837221 0.449767441 0.450638533 0.451295346 0.451766253 0.45207718 0.452365428 0.452522397 0.452597141 0.452586561 0.452541977 0.452477753 0.452395946 0.452391773 0.452310801 0.452239096 0.452114463 0.452206075 0.452368617 0.452518135 0.4529697 0.453508854 0.454033107 0.454864085 0.455559313 0.456234008 0.457071185 0.457894862 0.456600487 0.457521766 0.458387524 0.459271133 0.460110128 0.461026669 0.461957037 0.462967157 0.463927925 0.464915633 0.465864211 0.46687451 0.467884243 0.468880892 0.469833642 0.470831215 0.471834064 0.472779602 0.473665595 0.474624336 0.475591362 0.476520896 0.477439463 0.478384405 0.479303837 0.480179369 0.481027722 0.481937021 0.482885003 0.483764082 0.484626472 0.485474586 0.486279607 0.487112761 0.487920165 0.488731802 0.489481479 0.49022159 0.490926385 0.491605699 0.492236048 0.492855698 0.49349764 0.494016021 0.494438857 0.494872332 0.495259494 0.495611548 0.495945722 0.496203303 0.496370494 0.496472508 0.496568203 0.496586174 0.496500105 0.496336788 0.49605459 0.495632499 0.495073199 0.494391382 0.493462473 0.492345363 0.491013169 0.489409089 0.487554163 0.485462278 0.483046889 0.480422884 0.477576077 0.474537581 0.471328229 0.467977166 0.464510709 0.460990369 0.457427055 0.453912765 0.450482607 0.447226375 0.444158494 0.441254437 0.438548118 0.436073661 0.433857024 0.431827307 0.429907978 0.428098172 0.42637071 0.424723446 0.423063934 0.421403259 0.419801325 0.41828081 0.416879147 0.415563852 0.414398462 0.413397461 0.412552834 0.411875695 0.411385417 0.411040664 0.410821497 0.410756737 0.410848647 0.411115885 0.411542565 0.412141532 0.412953973 0.413997829 0.415179312 0.416470855 0.417878181 0.419345111 0.420798689 0.422209233 0.423589259 0.424927354 0.426240414 0.427497298 0.428655535 0.429746926 0.430759013 0.431696981 0.432549745 0.433321506 0.434023559 0.434661269 0.435249269 0.435764313 0.436226964 0.436656505 0.43702364 0.437329471 0.437623799 0.437926084 0.438249439 0.438596517 0.438989431 0.43938005 0.439812124 0.440271467 0.440743387 0.441220701 0.44168663 0.442096412 0.442433923 0.442699552 0.442877442 0.442972451 0.442940444 0.442815632 0.442577332 0.442233562 0.441771865 0.441192627 0.440492392 0.439623475 0.438585669 0.437412232 0.436078519 0.434564114 0.432857513 0.43101725 0.429015458 0.426783055 0.424404979 0.421912402 0.419304401 0.416562527 0.413700998 0.410775244 0.407752633 0.4047077 0.401674032 0.398666829 0.395697504 0.392774522 0.389897048 0.387080669 0.384351164 0.381726563 0.379229635 0.376862496 0.374652296 0.372577339 0.370553404 0.368527442 0.366449773 0.364245147 0.361797869 0.359027177 0.35594061 0.352529675 0.348697782 0.344447374 0.339834303 0.334872007 0.329524577 0.323888421 0.318029493 0.311985672 0.305802703 0.299533635 0.293281376 0.287143767 0.281169295 0.27542153 0.269990474 0.264916271 0.26022923 0.255904168 0.251974165 0.248478979 0.24539125 0.242651239 0.240256578 0.238229841 0.236532852 0.235094801 0.233896405 0.232931241 0.232164711 0.231536821 0.231032401 0.230625108 0.230291516 0.229992658 0.229718074 0.229472041 0.229242757 0.229028165 0.2288481 0.228724077 0.228676975 0.228714019 0.228841379 0.229057312 0.229374081 0.229777977 0.230249316 0.230796069 0.231381938 0.232014596 0.232701451 0.233408049 0.234138727 0.234904841 0.235695347 0.236510321 0.237340793 0.238189802 0.239061132 0.239959776 0.24085629 0.241725922 0.242612198 0.243507758 0.24438262 0.245223746 0.246035933 0.246826634 0.247561559 0.248221487 0.248857111 0.249465078 0.250026494 0.25055635 0.251075357 0.251585007 0.252085596 0.252559334 0.253030717 0.253508419 0.253973782 0.254442424 0.254918724 0.255388707 0.255856484 0.256329328 0.256774455 0.257190853 0.257615775 0.258031011 0.258426398 0.258823574 0.259203166 0.259589404 0.259985447 0.260385871 0.260805815 0.2612499 0.261730701 0.262267917 0.262879074 0.263550937 0.264298856 0.265134305 0.266023487 0.26698783 0.268014789 0.269070059 0.270149529 0.271238446 0.272313535 0.273391426 0.274471372 0.275538355 0.276593596 0.277598053 0.278574586 0.279535115 0.280434042 0.281300008 0.282108039 0.282866329 0.283585101 0.284246176 0.284840345 0.285376102 0.285843551 0.286210537 0.28648746 0.286651939 0.286709249 0.28665936 0.286495805 0.286229193 0.285867304 0.285396904 0.284862012 0.284305543 0.283737123 0.283187509 0.282697737 0.282285541 0.281890601 0.281510979 0.281168401 0.280831039 0.280458063 0.280055076 0.279605269 0.279098809 0.278528392 0.27788505 0.277171493 0.276422799 0.27565828 0.274900585 0.274141401 0.273382783 0.272630066 0.27187717 0.27112636 0.270384222 0.269587666 0.268714964 0.267804801 0.266919613 0.266091257 0.265342146 0.264757067 0.264329672 0.264035642 0.263904899 0.26390025 0.26395601 0.264065534 0.264164925 0.264183313 0.264116347 0.263956547 0.263739347 0.263445586 0.263085693 0.262720495 0.262335539 0.261892796 0.261406958 0.260935754 0.260506183 0.260091007 0.259753197 0.259494781 0.259268105 0.259095728 0.258975416 0.258843243 0.258744687 0.258681715 0.258647859 0.258651882 0.258673608 0.258731425 0.258849621 0.259020239 0.259228885 0.259432971 0.259649307 0.259938002 0.260230035 0.260515153 0.26078403 0.261001706 0.261226863 0.261453956 0.261630625 0.261799932 0.26199016 0.262198448 0.262417823 0.262629092 0.262878597 0.263136208 0.263433546 0.263773441 0.263207555 0.263677925 0.264191598 0.26471132 0.265222251 0.265678406 0.266072005 0.266360223 0.266558766 0.266576439 0.266440332 0.266147614 0.265650988 0.264927328 0.263975948 0.262714446 0.26116994 0.259321064 0.257136405 0.254551679 0.251618534 0.248283893 0.24446778 0.240182742 0.235410362 0.230064452 0.224062204 0.217560574 0.210662365 0.203349873 0.195729405 0.187964946 0.180260584 0.172808036 0.165597379 0.158850372 0.152729496 0.147318453 0.142539889 0.138422862 0.135004818 0.132163301 0.129858077 0.128019914 0.126598686 0.125593111 0.124976709 0.124705754 0.124726772 0.124986254 0.12545009 0.126130417 0.127005905 0.128026843 0.129153699 0.130434126 0.131795138 0.133240148 0.134716779 0.136235222 0.137780964 0.139352605 0.140938535 0.142516449 0.144122705 0.145756841 0.147355527 0.148954928 0.150587529 0.152207077 0.153802082 0.15540123 0.157026738 0.158641383 0.160258844 0.161855817 0.163428769 0.164981931 0.166489765 0.167975783 0.16942054 0.170841157 0.172195643 0.173482001 0.174661621 0.175764799 0.17677781 0.17769748 0.178499505 0.179206505 0.179801673 0.180253431 0.180543989 0.180708244 0.180733189 0.18062 0.180364579 0.180006489 0.179538935 0.178943008 0.178220734 0.177399993 0.176512331 0.175574735 0.174576491 0.173521817 0.172421589 0.171277896 0.170103744 0.168930948 0.167810842 0.166709781 0.165637821 0.164570093 0.163560331 0.162611097 0.161684126 0.160761833 0.159888521 0.159071073 0.158301637 0.157574654 0.156903133 0.156312674 0.155780062 0.155328467 0.154908165 0.154523805 0.154192477 0.153919324 0.153637171 0.153345853 0.153106406 0.152941227 0.152804479 0.15269652 0.152663141 0.152678117 0.152729824 0.152840555 0.152981073 0.153181404 0.153413042 0.153657347 0.153938964 0.154252037 0.154585436 0.154915243 0.155245364 0.155597955 0.155968845 0.156313017 0.156692341 0.157153249 0.157672524 0.158203587 0.158724129 0.15926829 0.159863874 0.160447985 0.160996571 0.161592379 0.162206471 0.162809134 0.163393959 0.163935095 0.164456531 0.164988399 0.165514365 0.16603744 0.166552544 0.167070195 0.167581216 0.168065771 0.168555394 0.16907987 0.169569492 0.17002368 0.170446798 0.170907572 0.171388149 0.171833813 0.17226027 0.172692135 0.173106283 0.173496217 0.173873559 0.174197793 0.174504057 0.174760982 0.174943328 0.175046563 0.175014555 0.174882382 0.174667656 0.174318537 0.173797488 0.173090443 0.172237352 0.171252295 0.170105919 0.168747202 0.167263493 0.165675044 0.16400373 0.162234679 0.160439581 0.158683509 0.156921864 0.155183226 0.153537527 0.151997238 0.150529593 0.14909865 0.147710934 0.146404296 0.145208418 0.144099057 0.143088192 0.142220825 0.141510069 0.140986398 0.140658826 0.140545547 0.140568808 0.140673637 0.140828595 0.140975118 0.141046166 0.140989468 0.140771449 0.140434012 0.139924407 0.139294416 0.13857694 0.13777864 0.136957318 0.136071712 0.135149717 0.134311914 0.133617759 0.13298893 0.132418424 0.131951287 0.131600142 0.131233633 0.130872086 0.130518422 0.130190864 0.129924968 0.129689515 0.129458576 0.129268005 0.129119635 0.128976017 0.128901362 0.128826067 0.128749654 0.128697023 0.128639758 0.128625467 0.128682524 0.12873666 0.128817707 0.128881618 0.128958911 0.129021272 0.128988534 0.128940493 0.128947288 0.128933579 0.128840342 0.128760368 0.128729016 0.128678188 0.12861681 0.128615156 0.128625244 0.128556192 0.128508598 0.128428191 0.128293723 0.128201619 0.128044993 0.127836496 0.127579212 0.127200276 0.126817167 0.12640664 0.125874117 0.125104934 0.124411821 0.123794913 0.123014092 0.122172222 0.121366091 0.120531291 0.119595639 0.118540324 0.117547221 0.116562739 0.115415268 0.114322208 0.113266908 0.11222554 0.111097477 0.109928325 0.108882636 0.107938461 0.106882632 0.105664387 0.104579613 0.103545077 0.102479815 0.101298407 0.100377694 0.099471793 0.098397262 0.097422801 0.096507676 0.095687933 0.094988622 0.09418837 0.093512863 0.093033366 0.092557669 0.092004359 0.091416933 0.091152802 0.090914972 0.090596169 0.090523235 0.090452604 0.090157628 0.090168603
"35" 0.246797606 0.249633148 0.252491884 0.255330175 0.258224905 0.261126265 0.264032364 0.266924694 0.269898355 0.272866771 0.275843069 0.278771892 0.281733409 0.284737647 0.287763625 0.290751681 0.293700844 0.296650693 0.299679697 0.302663967 0.305727124 0.308708549 0.311735392 0.314741492 0.317751169 0.320679739 0.323632315 0.32662639 0.329558343 0.332483992 0.335383072 0.338299319 0.341195002 0.344048619 0.34689641 0.349722102 0.352432296 0.355240405 0.357912809 0.360605791 0.363269329 0.365883812 0.368399203 0.370933086 0.37343125 0.375879511 0.378226668 0.380622074 0.382895589 0.385186255 0.387358785 0.389545843 0.391592786 0.393661663 0.395644367 0.397556677 0.399344966 0.401097521 0.40281345 0.404427066 0.405999467 0.407646105 0.409174249 0.410732165 0.41219987 0.413682505 0.415172026 0.416651204 0.418114528 0.419724569 0.421205595 0.422702596 0.424324766 0.425728813 0.427253708 0.428562298 0.430007294 0.431469813 0.43279621 0.434124961 0.43540594 0.436554641 0.437622979 0.438609093 0.439420313 0.440128237 0.440639898 0.440991983 0.441157132 0.441310406 0.441330507 0.441277802 0.441129491 0.440947846 0.440765902 0.440520465 0.440398425 0.44019042 0.440043703 0.439809054 0.439764813 0.439910367 0.439966276 0.440283015 0.44075653 0.441193566 0.441940188 0.442544326 0.443135843 0.443893269 0.44470647 0.443485856 0.444330439 0.445147768 0.445998549 0.446799666 0.447627559 0.448513061 0.449500859 0.450391173 0.451329306 0.452230349 0.453202888 0.454176217 0.455107167 0.45602861 0.456974685 0.457926482 0.458841965 0.459705591 0.460636377 0.461559162 0.462469846 0.463325799 0.464222267 0.465116248 0.46596998 0.466809154 0.4676871 0.46859169 0.469439685 0.470261022 0.471051544 0.471796304 0.472583503 0.473365709 0.474137798 0.474823177 0.475523293 0.476204947 0.47682637 0.477404207 0.477984861 0.478589028 0.479067758 0.479442462 0.479835719 0.480186999 0.480489045 0.48077248 0.480995983 0.481137484 0.481221154 0.48126483 0.481240109 0.481122166 0.480923936 0.480613187 0.480178952 0.479605615 0.478899792 0.477964237 0.476830095 0.475482523 0.473859757 0.471993074 0.469882756 0.467457995 0.464819252 0.461961389 0.458915696 0.45569694 0.452326432 0.448843375 0.44532755 0.441776261 0.438264415 0.434858158 0.431633905 0.428596705 0.425726295 0.423061952 0.42062971 0.418446749 0.41644071 0.414538488 0.412745774 0.411040515 0.409408957 0.40776968 0.40613085 0.404565245 0.403072387 0.401679918 0.400360674 0.399184898 0.398181424 0.397327811 0.396632358 0.396126091 0.395770118 0.395545676 0.395478442 0.395550072 0.395794541 0.396203116 0.396773085 0.397540346 0.398519576 0.399643242 0.400884524 0.402222306 0.403612494 0.405006826 0.406375557 0.40771161 0.409004778 0.410262614 0.411476731 0.412605196 0.413669065 0.414657682 0.415568233 0.416383758 0.417117164 0.417782307 0.418398649 0.41896911 0.419464827 0.419905409 0.420317069 0.420673162 0.420974404 0.421264321 0.421557248 0.42187123 0.422211796 0.422593579 0.422981128 0.423417479 0.423881784 0.424369931 0.424869239 0.425351933 0.42576918 0.426124528 0.426402509 0.42659004 0.426674902 0.4266368 0.426503241 0.426252633 0.425883979 0.425393701 0.424786478 0.424064606 0.42316474 0.422102943 0.420903161 0.419547245 0.41802457 0.416317075 0.41446726 0.412464008 0.410246953 0.407889113 0.405426919 0.402847096 0.400141835 0.397328183 0.394463331 0.391509473 0.388532504 0.385573044 0.3826444 0.379757553 0.376916349 0.374118745 0.371386856 0.368736222 0.366190419 0.363774404 0.361483529 0.359337032 0.357324123 0.355376244 0.353430197 0.35143587 0.349319026 0.346972361 0.344317004 0.341353282 0.338076815 0.334399581 0.330313623 0.325879231 0.321104661 0.315952003 0.310522288 0.304874852 0.299059898 0.293121308 0.287102163 0.281104118 0.275213212 0.269478992 0.263964787 0.258752793 0.253887504 0.249393471 0.245238513 0.241462164 0.238101847 0.235131577 0.232492112 0.230186597 0.228235736 0.226598054 0.225210063 0.224056527 0.223125264 0.222381987 0.221772455 0.2212798 0.220881417 0.220555395 0.220261976 0.21999687 0.219761282 0.219537996 0.219329998 0.219151735 0.219022103 0.218963444 0.218984351 0.219096698 0.21929498 0.219584212 0.219956093 0.220394567 0.22089871 0.221446544 0.22203853 0.222681269 0.223350286 0.224043176 0.224773034 0.225529127 0.22630538 0.227098815 0.227907456 0.228738159 0.229595706 0.230451792 0.231284127 0.232127145 0.232978493 0.233811766 0.234616533 0.235386848 0.236134745 0.236835934 0.237470835 0.238072187 0.238644019 0.239176303 0.239675149 0.24016612 0.240645006 0.241117708 0.241564021 0.242007077 0.242461786 0.242900573 0.243338019 0.243786082 0.244229183 0.244672723 0.245114073 0.245535158 0.24593167 0.246336453 0.246726751 0.24709931 0.24747429 0.247835107 0.248196885 0.248562761 0.248935089 0.249326997 0.249749579 0.250202596 0.250707589 0.251291268 0.251932196 0.252645649 0.253446162 0.254306048 0.255236119 0.256219558 0.257231794 0.258280076 0.25933563 0.260376632 0.261426151 0.262469932 0.263499022 0.264519811 0.265495643 0.266439736 0.267373189 0.268255845 0.269104958 0.269901946 0.270645186 0.271345049 0.27199316 0.272585958 0.273115441 0.273578689 0.27394937 0.274228632 0.274406463 0.274490044 0.274471074 0.274339423 0.274108559 0.273784548 0.273363456 0.272870183 0.272349581 0.271823332 0.271314606 0.270860732 0.270468414 0.270102113 0.269752473 0.269423559 0.269094855 0.268739387 0.268355593 0.267932728 0.267450243 0.266903698 0.2662936 0.265618041 0.26491186 0.264181837 0.263448864 0.262722895 0.262005106 0.261292458 0.26058156 0.259867691 0.25915885 0.258405581 0.257581629 0.256720886 0.255871817 0.255079016 0.254368946 0.253803633 0.253376797 0.253084868 0.252952531 0.252924979 0.252954446 0.253033005 0.253106095 0.253114149 0.253036052 0.252863951 0.252637617 0.25234814 0.251995511 0.251635887 0.251253262 0.250821605 0.250352651 0.249887921 0.249458313 0.249059215 0.24872607 0.248457149 0.24822963 0.248053834 0.247918367 0.247781157 0.247677483 0.247609913 0.247574501 0.247565724 0.247579783 0.247640118 0.247760586 0.247927085 0.248134546 0.248342201 0.248558849 0.248837866 0.249113932 0.249384671 0.249651283 0.249875113 0.25009387 0.250314578 0.250481702 0.25064075 0.250830345 0.251029119 0.251245551 0.251461655 0.251700118 0.251961239 0.252266854 0.252586804 0.252043031 0.252495423 0.252986588 0.253485247 0.253968187 0.254394501 0.254764982 0.255040213 0.255226493 0.255250275 0.255118325 0.254838072 0.254377864 0.253698789 0.25278338 0.251597553 0.250141293 0.248364083 0.246272184 0.243818939 0.241035648 0.237861402 0.234239809 0.230175331 0.225657254 0.220592238 0.214911126 0.20874685 0.202202812 0.195266627 0.188052185 0.18070931 0.173417926 0.166342996 0.159504496 0.153100297 0.14726568 0.142103896 0.137553766 0.133615643 0.130329534 0.12759674 0.125385173 0.123609766 0.122226998 0.121241391 0.120623451 0.120336622 0.120335057 0.120564882 0.121001314 0.121648341 0.122468356 0.123418946 0.124489695 0.125698946 0.126992594 0.128356621 0.129760362 0.131217346 0.132711321 0.134216286 0.135733902 0.137244694 0.138769522 0.140310429 0.141821705 0.143340588 0.144892275 0.146433949 0.147962354 0.149502344 0.151047476 0.152583972 0.154128984 0.155641988 0.157145381 0.158648551 0.160098426 0.161518872 0.162894316 0.164232351 0.165507719 0.166721061 0.167847335 0.168897331 0.169865221 0.170735672 0.171482913 0.172143236 0.172709793 0.17314256 0.173423506 0.173570246 0.173583895 0.173472874 0.173231438 0.172885612 0.172428273 0.171850219 0.171162583 0.17038139 0.169532731 0.168633051 0.167669959 0.166654065 0.165598005 0.164506324 0.163384043 0.162262455 0.161179654 0.160115927 0.159077257 0.158047765 0.1570656 0.156140931 0.155237287 0.154338136 0.153484516 0.15269582 0.15196576 0.151256107 0.150599547 0.150047749 0.149530075 0.14907515 0.148680247 0.148331299 0.148013636 0.147730678 0.147439435 0.147167116 0.14695958 0.146806173 0.146652915 0.146539077 0.146509752 0.14651905 0.14658124 0.146713361 0.146870956 0.147066079 0.147289678 0.147532597 0.147799976 0.148106061 0.14842613 0.148743697 0.149057016 0.149404466 0.149770372 0.150122531 0.150509559 0.150949232 0.151433803 0.151941746 0.15245308 0.152985245 0.153538965 0.154092729 0.154631913 0.155198418 0.155772083 0.156335071 0.156882308 0.157401688 0.157915831 0.158425473 0.15890763 0.159385823 0.159859553 0.160351135 0.16084601 0.161318973 0.161781549 0.162272662 0.162738726 0.163169324 0.163586132 0.164031275 0.164485715 0.164894775 0.165287666 0.165700741 0.166098297 0.166465394 0.166833192 0.167147607 0.167429425 0.167662285 0.167826101 0.167924397 0.167883873 0.167755656 0.167553402 0.167206451 0.166692935 0.166007616 0.16519472 0.16425734 0.163159318 0.161852241 0.160441399 0.158930644 0.157323644 0.155636087 0.153928801 0.152259476 0.15058931 0.148933999 0.147362731 0.145899527 0.144493848 0.143121861 0.141787544 0.140531391 0.139387816 0.138305992 0.137319908 0.136490017 0.13581571 0.135297455 0.134973131 0.134858355 0.13485349 0.13493108 0.135043338 0.135136314 0.135201558 0.135141872 0.134935394 0.134608991 0.134109817 0.133485906 0.132797539 0.132025808 0.131218471 0.130355582 0.129475504 0.128693379 0.12803591 0.127445109 0.126914699 0.126495443 0.126171872 0.125840578 0.125506599 0.125174124 0.124871951 0.124593981 0.124317918 0.124084849 0.123911135 0.123759583 0.123621464 0.123546418 0.123490676 0.12342177 0.123356421 0.123299219 0.12328469 0.12335157 0.123407554 0.123477954 0.123542693 0.123597726 0.123638444 0.123617314 0.123579588 0.123583104 0.123592786 0.123539712 0.123491097 0.123468366 0.123423271 0.123396575 0.123432688 0.123427704 0.123358645 0.123318825 0.123254243 0.123148639 0.123026043 0.122909293 0.122756794 0.122508444 0.122126255 0.121746417 0.121361859 0.120833017 0.120136913 0.119501337 0.118907779 0.118150253 0.117335979 0.116569899 0.115776692 0.114900347 0.113871984 0.112881571 0.111961115 0.110903572 0.109803144 0.108756099 0.107801002 0.106771141 0.105623689 0.104571883 0.103667237 0.102650464 0.101520795 0.100479238 0.099481139 0.09851113 0.097425029 0.09646653 0.09555918 0.094605703 0.093667116 0.092728063 0.091934327 0.091343071 0.090625461 0.089904796 0.089399643 0.088916689 0.088310651 0.087780923 0.087541617 0.087292824 0.087064225 0.087013334 0.086915299 0.086597424 0.086575363
"36" 0.224197611 0.227279782 0.230399802 0.233530402 0.23670876 0.239858925 0.243047565 0.246211752 0.249411419 0.252669513 0.25588578 0.259076178 0.262266666 0.265521586 0.26879245 0.27203536 0.275257021 0.278465509 0.2817384 0.284976572 0.288242459 0.291490883 0.29474929 0.297973812 0.301234692 0.304386884 0.307562381 0.310810119 0.313997537 0.317119062 0.320253134 0.323417932 0.326570272 0.32967326 0.332766503 0.335845798 0.338804901 0.341855019 0.344801396 0.347757339 0.350680083 0.35362637 0.356367975 0.359247953 0.362001359 0.364735365 0.367399931 0.370138288 0.372737318 0.375383526 0.377871275 0.380383849 0.382769227 0.385225475 0.387542903 0.389826357 0.392037779 0.39414227 0.396260858 0.398332536 0.400288552 0.402346373 0.404237688 0.406231195 0.408128828 0.409977734 0.411861897 0.413749278 0.415618926 0.417552114 0.419466078 0.421313733 0.423252702 0.425023913 0.426931292 0.428543359 0.430403262 0.432158411 0.433853209 0.435469806 0.43705231 0.438552111 0.440034389 0.441335887 0.442518532 0.443622857 0.444501877 0.445235491 0.445811272 0.446319759 0.44677484 0.447066426 0.447421283 0.447616965 0.447883219 0.448042542 0.448282003 0.448500276 0.448744476 0.448974997 0.44919762 0.449683607 0.450125456 0.450820535 0.451564163 0.452305049 0.45334205 0.45417726 0.455075115 0.456018567 0.457098097 0.455538779 0.456585884 0.457666129 0.458754867 0.459820062 0.460893154 0.462031811 0.463236511 0.46433267 0.465486139 0.466661572 0.467843801 0.468987703 0.470119745 0.471268892 0.472410351 0.473560899 0.474690497 0.475785822 0.47691077 0.47800529 0.479111344 0.48017624 0.481250286 0.482305825 0.483377993 0.484440833 0.485489517 0.486599892 0.487648815 0.488655239 0.489672005 0.490663469 0.491618484 0.492561489 0.493545651 0.494463742 0.495356143 0.49620229 0.49700886 0.497805327 0.498561352 0.499327123 0.499984562 0.500568748 0.501146138 0.501663446 0.502144635 0.502604663 0.503012002 0.50333333 0.50359726 0.503825366 0.503987253 0.50406158 0.504058719 0.503929079 0.503715217 0.503358841 0.502861798 0.502173245 0.501274645 0.500128865 0.498672903 0.496991605 0.495065391 0.492808431 0.490336239 0.487662613 0.484774947 0.481724292 0.478507578 0.475189298 0.471868306 0.468522489 0.465241522 0.462089688 0.459120512 0.456317872 0.45368284 0.45127809 0.449121952 0.447186738 0.445426971 0.443768919 0.442229867 0.440744698 0.439337969 0.437954247 0.436562181 0.435230047 0.433989763 0.432834297 0.431721032 0.430756152 0.429966956 0.429303914 0.428787738 0.428441763 0.428248852 0.428189337 0.428276598 0.428498805 0.428901345 0.429462522 0.430175543 0.431070954 0.432143897 0.433374673 0.434707075 0.436122954 0.437585175 0.439036041 0.440478921 0.441867352 0.443194389 0.444470912 0.445706278 0.44685781 0.447939396 0.448950499 0.449889123 0.450748146 0.451535434 0.452241361 0.452890873 0.453485459 0.454026282 0.454520911 0.45496738 0.455375493 0.455729634 0.456064612 0.456417382 0.456774622 0.457158417 0.457572401 0.457973629 0.45841381 0.458875477 0.459364891 0.459848106 0.460302413 0.460706085 0.461052626 0.461314619 0.46150443 0.461604893 0.461612999 0.461533338 0.461330026 0.461006045 0.46058315 0.460047603 0.459405273 0.458593756 0.457604051 0.456485301 0.455206841 0.453736842 0.452084184 0.450301588 0.448354006 0.446194738 0.443885148 0.441470206 0.438955516 0.436308861 0.433562577 0.430779785 0.427895099 0.425001144 0.42212975 0.419292867 0.416525662 0.413815022 0.411159962 0.408571452 0.406057239 0.403633416 0.401326954 0.399134308 0.397052526 0.395078331 0.393129528 0.391154587 0.389101505 0.386896372 0.384435415 0.381646067 0.378524572 0.375066787 0.371208727 0.366944522 0.362317502 0.357346475 0.352013886 0.346393794 0.340544045 0.334525496 0.328387856 0.322162628 0.315961927 0.309902608 0.304022521 0.298379153 0.293063223 0.288147986 0.283648044 0.279521286 0.275812626 0.272542357 0.269683808 0.267169148 0.265001863 0.26318115 0.261671603 0.260421664 0.259401947 0.25860101 0.257986635 0.25750798 0.257144481 0.256872773 0.25666064 0.256480694 0.256333977 0.2562204 0.256133497 0.256071419 0.256054878 0.256103545 0.256235838 0.256460667 0.256798416 0.257248759 0.257790089 0.258412272 0.259099007 0.259844095 0.260634691 0.261472404 0.262342691 0.263220668 0.264119744 0.265043974 0.265978783 0.266914517 0.267864168 0.268829495 0.269799501 0.270784914 0.271751016 0.272686899 0.273629427 0.274579048 0.275491565 0.276375443 0.277226597 0.278030694 0.278782666 0.279480726 0.280144215 0.280774832 0.281376213 0.28193748 0.282483786 0.283010721 0.283520192 0.284005344 0.284484684 0.284969747 0.285444528 0.285904408 0.286366314 0.286839664 0.28732878 0.287798643 0.28823024 0.288648605 0.289089829 0.289519191 0.289937437 0.290366411 0.290787697 0.291208088 0.291641355 0.292071432 0.292518675 0.292998046 0.293510437 0.294052273 0.294647664 0.295296311 0.295996279 0.29677707 0.297609478 0.298474491 0.299366772 0.300297081 0.301254869 0.302190483 0.303128481 0.304073632 0.305007607 0.305935889 0.306865066 0.307748407 0.308581531 0.309396237 0.31015569 0.310872883 0.311543733 0.31216988 0.3127428 0.313254476 0.313706189 0.314080685 0.314382732 0.314586431 0.314679533 0.314665675 0.314561099 0.314337492 0.31398654 0.313542455 0.313021868 0.312404305 0.311728537 0.311048031 0.310383648 0.309760481 0.309191138 0.308713913 0.308285356 0.307893872 0.307543457 0.307210743 0.306873292 0.306514472 0.30612421 0.305692643 0.305188268 0.3045955 0.30393815 0.303242147 0.302515209 0.301786363 0.301062763 0.300361216 0.29967764 0.298978984 0.298236072 0.297451556 0.296603978 0.295674682 0.294686526 0.293712348 0.292839587 0.292077392 0.29150039 0.291103065 0.290859669 0.290791154 0.290838033 0.290964544 0.291145235 0.291294545 0.291391104 0.291415304 0.291324526 0.291157156 0.290933549 0.290649623 0.290335625 0.289984494 0.289562792 0.289125979 0.288704425 0.288281858 0.287891477 0.287575841 0.287332624 0.28714022 0.286983103 0.28687048 0.286758721 0.28666997 0.286605895 0.286574125 0.286545634 0.286551178 0.286605954 0.286699504 0.286828667 0.286993653 0.287194222 0.287412256 0.287684947 0.287963808 0.288237631 0.288520575 0.288767576 0.288989872 0.289213359 0.289395124 0.289557487 0.289740652 0.289934635 0.290177405 0.290406525 0.290633619 0.29090482 0.291197836 0.291506916 0.290987164 0.291412473 0.291867703 0.292372197 0.292861968 0.293286562 0.293625116 0.293818146 0.293896228 0.293821514 0.293600619 0.293207973 0.29259482 0.291728795 0.290618122 0.289224923 0.287504315 0.285449952 0.283073992 0.280314714 0.277152508 0.273517638 0.269374371 0.264743656 0.259569257 0.253752321 0.247235417 0.240139529 0.232538819 0.224460363 0.215996802 0.207358375 0.19875446 0.19036907 0.182231367 0.174590647 0.167646274 0.161508083 0.15613398 0.15151073 0.14768602 0.144577876 0.142141819 0.140281171 0.138915882 0.138042733 0.137643024 0.137609586 0.1379053 0.138475627 0.139286876 0.140341371 0.141554996 0.142921954 0.144420832 0.146066308 0.147769287 0.149535373 0.151345283 0.153191164 0.155066401 0.156942949 0.158794805 0.160634249 0.162493974 0.164375812 0.166221157 0.16803728 0.169871688 0.171701744 0.17352365 0.175337136 0.177152693 0.178949654 0.180748865 0.182532206 0.184289053 0.186037093 0.187764496 0.189435676 0.191048607 0.192599371 0.19407919 0.195487887 0.196817428 0.198052809 0.199207023 0.200245649 0.201131105 0.20192197 0.202579647 0.203082085 0.203424007 0.203617916 0.20367907 0.20358555 0.203347385 0.202983305 0.202520326 0.201942936 0.201223537 0.200409248 0.199544832 0.198586196 0.197574586 0.19651477 0.195426375 0.19430384 0.193167701 0.192024603 0.190941155 0.189874485 0.188841969 0.187792093 0.186813131 0.185882136 0.184970126 0.184082776 0.183230177 0.182426348 0.181669846 0.180949792 0.180285186 0.179714873 0.179208845 0.178737491 0.178294033 0.17788747 0.1775195 0.177182928 0.176836833 0.176492408 0.176208138 0.17599307 0.175809473 0.175627902 0.175528646 0.175497174 0.175505504 0.175563172 0.175642475 0.175770551 0.175917298 0.17607525 0.176269233 0.176475704 0.176686585 0.176914006 0.177161217 0.177442446 0.177740753 0.178028405 0.178327605 0.178699464 0.17914857 0.179621488 0.180113316 0.180666402 0.18126063 0.181836843 0.182413071 0.183029234 0.183633476 0.18423444 0.184825733 0.185371101 0.185914502 0.186458394 0.186961532 0.187494278 0.1880413 0.188601211 0.189106449 0.189601749 0.190123558 0.190679342 0.191204607 0.191708833 0.192213282 0.192731857 0.193215489 0.193662122 0.194113031 0.19456768 0.195014969 0.195463404 0.195877731 0.19625926 0.196608201 0.196907178 0.197131425 0.197251707 0.197249725 0.197121114 0.196897879 0.196518615 0.195988253 0.195274502 0.194374099 0.193279088 0.192015603 0.190531403 0.188856483 0.187057152 0.185172662 0.18319656 0.181190625 0.179199189 0.177205145 0.175270051 0.173451543 0.171750799 0.170156524 0.168704972 0.167323038 0.166001156 0.164809644 0.163727388 0.162755489 0.161913201 0.161203563 0.160641104 0.160272345 0.160072803 0.159995079 0.160042912 0.160133839 0.160164267 0.160168186 0.160077542 0.159805402 0.159405798 0.158879578 0.158167899 0.157350138 0.156479105 0.155524135 0.154509753 0.153498143 0.152573258 0.151828974 0.151231334 0.150701523 0.150305048 0.150073379 0.14988938 0.149649516 0.149346292 0.149074212 0.148787767 0.148496449 0.148293704 0.148191109 0.148051053 0.147860855 0.147762045 0.147694483 0.147665352 0.147569016 0.147488087 0.14751561 0.147620484 0.147792459 0.147914886 0.147995159 0.148076445 0.148139238 0.148115933 0.148039073 0.148005247 0.147963643 0.147820637 0.147651136 0.147487164 0.147344917 0.147127703 0.146888673 0.146713078 0.146569878 0.146450087 0.146360174 0.146165043 0.145895794 0.145662561 0.14531216 0.144895494 0.144471973 0.14397113 0.143346727 0.14268361 0.141857192 0.141007707 0.14018403 0.139200926 0.138153523 0.137077063 0.136114717 0.135116771 0.133870751 0.132648051 0.131386846 0.130040824 0.128689364 0.127249375 0.126027569 0.124742962 0.123307288 0.121929422 0.120699823 0.119595349 0.118271343 0.116956152 0.115767196 0.114400625 0.112943165 0.11191202 0.110741466 0.10944891 0.108164586 0.107087024 0.106141433 0.105099753 0.103973828 0.103038833 0.102317892 0.101538062 0.100820057 0.100352079 0.100105546 0.099712715 0.099277668 0.098996408 0.098818958 0.098723941 0.098476976
"37" 0.266720474 0.270117015 0.273525625 0.276865751 0.280307889 0.283723801 0.287115246 0.29053995 0.293984056 0.297439128 0.300834149 0.304258198 0.307724804 0.311166883 0.314597726 0.318010449 0.321476549 0.324880958 0.328292012 0.331730574 0.335175395 0.338590592 0.341984749 0.345378458 0.348787248 0.352095574 0.355473757 0.358802915 0.362142324 0.365505397 0.368749589 0.372018188 0.375306696 0.378530413 0.381678343 0.384921432 0.388027966 0.391080767 0.394196868 0.397258908 0.400265038 0.4032318 0.406079203 0.409015238 0.411842912 0.414623082 0.417424321 0.420143962 0.422779649 0.425439119 0.428001016 0.430525303 0.433010131 0.435363591 0.437723041 0.439994633 0.442147493 0.444330573 0.44637233 0.448461026 0.450438321 0.452425927 0.454327554 0.456313789 0.458105773 0.459948927 0.461865485 0.463659674 0.465516955 0.467451811 0.46929425 0.471144855 0.473034114 0.474822134 0.476617038 0.47827518 0.480016887 0.481755793 0.483400732 0.485004425 0.486548394 0.48796773 0.489300638 0.490605384 0.491803825 0.49269256 0.493511558 0.494246006 0.494700432 0.495188951 0.495422632 0.495681763 0.495841861 0.495976716 0.496225268 0.496239483 0.496149957 0.496365279 0.496436149 0.496557593 0.496759146 0.49726072 0.497615397 0.498093814 0.498803169 0.499572456 0.500242651 0.501324177 0.50185895 0.502702475 0.503868997 0.502237022 0.503391445 0.504547656 0.505708754 0.506890178 0.508155286 0.509391308 0.51064992 0.511879444 0.513048232 0.514284313 0.51562649 0.516976178 0.518167257 0.519398332 0.520639598 0.521883786 0.523119688 0.524352014 0.525489628 0.526562691 0.527611732 0.528749883 0.529848874 0.530888975 0.531819165 0.532805681 0.533826232 0.534796596 0.535817564 0.536800861 0.53774035 0.538712263 0.539666355 0.540598869 0.541546464 0.542508125 0.543458045 0.544372737 0.545245171 0.546187341 0.547088861 0.547981381 0.548809826 0.549611926 0.550399959 0.551154137 0.551832795 0.552528679 0.55319345 0.553795755 0.554324031 0.554779828 0.555171967 0.555473149 0.555682123 0.55579859 0.555793166 0.555624425 0.555292487 0.554718614 0.553919971 0.5528543 0.551455438 0.549809337 0.547952592 0.545750558 0.543314576 0.540696144 0.53790462 0.534919381 0.531781614 0.52854538 0.525287628 0.522052884 0.518863022 0.515797377 0.512870729 0.510154784 0.507645428 0.505344272 0.503281593 0.50143218 0.499747336 0.498171985 0.496677101 0.495241642 0.493863136 0.492483526 0.491109639 0.489820391 0.48860693 0.487451494 0.486410588 0.485475183 0.484687179 0.48407203 0.483599275 0.483264565 0.483100712 0.483091354 0.483212769 0.483479142 0.483940691 0.484579861 0.485386848 0.486347944 0.487470567 0.488765478 0.490208238 0.491693705 0.493190646 0.494696617 0.496224791 0.497738689 0.4991633 0.500470102 0.501759708 0.502961814 0.504070878 0.505093098 0.506096244 0.507054865 0.507906914 0.508652091 0.509352267 0.510019302 0.510606468 0.511158586 0.511667073 0.512121081 0.512553751 0.512970984 0.513388753 0.513825893 0.514286101 0.514737725 0.515183628 0.515676439 0.516138434 0.516601205 0.517054737 0.517461419 0.517803788 0.518083394 0.518276632 0.518404901 0.518466294 0.518505692 0.518465459 0.518339217 0.518104851 0.517794609 0.517414749 0.516946673 0.516362369 0.515646815 0.514768302 0.513717949 0.512529314 0.511179328 0.509664416 0.507953644 0.505999863 0.503846586 0.501551867 0.499130875 0.496563137 0.493847549 0.491067857 0.488211989 0.485337734 0.482424736 0.47958228 0.476796865 0.474074006 0.471428335 0.468810052 0.466284037 0.463872761 0.461525768 0.459225029 0.456997573 0.454885364 0.452801734 0.450727731 0.448611081 0.446368515 0.443923771 0.44115293 0.438017249 0.434502751 0.43055886 0.426182568 0.421462595 0.416417509 0.411003858 0.405308992 0.399363726 0.393227488 0.386960685 0.380586982 0.37421605 0.367943227 0.361831427 0.355968475 0.350417584 0.345235288 0.340489924 0.336146235 0.332220078 0.328759283 0.325737387 0.323072255 0.320775777 0.318852216 0.317261398 0.315944344 0.314891785 0.31407091 0.313449711 0.31298998 0.312645316 0.312401026 0.312242657 0.312127411 0.312044024 0.311997086 0.311973393 0.311983496 0.312065959 0.312216461 0.312447071 0.312780112 0.313240349 0.313802034 0.314457297 0.315185249 0.315966934 0.316803575 0.31768322 0.318586916 0.319511563 0.320449531 0.321396232 0.32235992 0.32334739 0.324338973 0.325349718 0.326359481 0.327386707 0.328426838 0.329435468 0.330415875 0.331405163 0.332398474 0.333351761 0.334261417 0.335144848 0.335980475 0.336779505 0.337527335 0.338218153 0.338897288 0.339548618 0.340134084 0.340674639 0.341215163 0.341719419 0.342180103 0.34266004 0.343151122 0.343613237 0.344076365 0.344534636 0.344987571 0.345446646 0.345886171 0.346301675 0.346711606 0.347127676 0.347554058 0.347991586 0.348428965 0.348872185 0.349334776 0.349792749 0.350266248 0.35075587 0.351251632 0.351797253 0.352402866 0.353044719 0.353722394 0.354453713 0.355258346 0.356122255 0.357015938 0.357950121 0.358916759 0.359895557 0.360875249 0.361861974 0.362824798 0.363764912 0.364709169 0.365637332 0.366531283 0.367385298 0.368196636 0.368967891 0.36969769 0.370363742 0.370964617 0.371518195 0.372003078 0.372438967 0.372808337 0.373093605 0.373309374 0.373426288 0.373416126 0.373275697 0.373007119 0.372599334 0.372086406 0.371489912 0.370792061 0.370018929 0.369211853 0.368413001 0.36768645 0.367024779 0.366428733 0.365894556 0.365416259 0.364966393 0.364538401 0.364120454 0.36367026 0.363210499 0.362714022 0.362132818 0.361473143 0.360749632 0.359963834 0.359142333 0.358328104 0.357544094 0.356775552 0.356016994 0.355270624 0.354502976 0.353668869 0.352764398 0.351768792 0.350711614 0.349677324 0.348732352 0.347932756 0.347332716 0.346927404 0.346695334 0.346633345 0.346726924 0.346948653 0.347187787 0.347391456 0.347541898 0.347583473 0.347509623 0.347363114 0.347172648 0.346934795 0.346643656 0.346319348 0.345977038 0.345641494 0.345304579 0.34496212 0.344652295 0.344404161 0.344214559 0.344080478 0.344005078 0.343940794 0.343900353 0.343874335 0.343885452 0.343943089 0.344017893 0.34408614 0.344179779 0.344359338 0.344603628 0.344857275 0.345142961 0.345440626 0.345788777 0.346152604 0.34649545 0.346852124 0.347157836 0.347422481 0.347699821 0.347983152 0.348274648 0.348590583 0.348926067 0.349286795 0.349641055 0.350040197 0.350495487 0.350971818 0.351450026 0.350729972 0.351218343 0.35168305 0.3521505 0.352593929 0.352973342 0.353269011 0.35344699 0.353510797 0.353396177 0.353121519 0.352684826 0.352078944 0.351246119 0.350191802 0.348921269 0.347379625 0.345528215 0.343340039 0.340745807 0.337655336 0.334034711 0.32989341 0.325225532 0.320026934 0.314138919 0.307570934 0.300423443 0.292703182 0.284405231 0.275688499 0.266717762 0.257691532 0.248862118 0.240271866 0.232147068 0.224732772 0.21817328 0.212427527 0.207496598 0.203392401 0.200067401 0.197452337 0.195485055 0.194080904 0.193220109 0.192855909 0.192906156 0.193339437 0.194056481 0.195040792 0.196270019 0.197705895 0.199332401 0.201079369 0.202950597 0.204871148 0.206841156 0.208827451 0.210826129 0.212854415 0.214890569 0.216897681 0.218899474 0.220925763 0.222908407 0.224852368 0.226786658 0.228745997 0.230654508 0.232562855 0.234447554 0.236310214 0.238176942 0.240036786 0.241869777 0.243679434 0.245462492 0.247226015 0.248926967 0.250562429 0.252142012 0.253641874 0.255058289 0.256357402 0.257541597 0.258636832 0.259573191 0.260338366 0.2609604 0.261441767 0.261754245 0.261881858 0.261887193 0.261731267 0.261428416 0.260959327 0.260361433 0.259628773 0.258782595 0.257817209 0.256783158 0.255658269 0.254439533 0.253152847 0.251827836 0.250506461 0.249151811 0.24778603 0.246458218 0.245200366 0.243998811 0.242857039 0.241735905 0.240667 0.239646628 0.23867628 0.237747148 0.236832842 0.235960856 0.235132456 0.234371126 0.233677313 0.23306857 0.232518449 0.231986508 0.231472403 0.230991781 0.230544195 0.23012799 0.229729816 0.229363203 0.229049191 0.228792921 0.228570864 0.228390336 0.228297874 0.228250459 0.228228882 0.228266418 0.2283438 0.228452429 0.228620186 0.228770539 0.228900194 0.229072541 0.229263991 0.229466289 0.229671642 0.229893714 0.23012118 0.230348289 0.230603665 0.230946094 0.231329411 0.231743976 0.232209623 0.232714862 0.233241111 0.233792037 0.234379113 0.234969765 0.235500976 0.236005917 0.236502618 0.236966878 0.237441242 0.237929657 0.238418594 0.238919109 0.239432514 0.239957988 0.240460321 0.240951106 0.241463959 0.241943359 0.242384031 0.242827058 0.243283823 0.243767202 0.244238973 0.244696051 0.24515447 0.245606124 0.246052057 0.246441722 0.246820584 0.247239813 0.247629762 0.247955963 0.248248249 0.248403549 0.248383597 0.248281926 0.248043761 0.24757427 0.246894866 0.246083707 0.245113522 0.243952915 0.242511973 0.240855753 0.23906517 0.237138107 0.235053867 0.232842669 0.230606675 0.228360847 0.226105034 0.223944038 0.221881628 0.219896108 0.218026713 0.216256171 0.214609578 0.213131279 0.211786598 0.210520193 0.209353149 0.208359122 0.207517236 0.206834018 0.206282884 0.205904275 0.205678776 0.20558615 0.205554813 0.20549342 0.205380484 0.205159649 0.204797849 0.204359382 0.203772396 0.202966481 0.202120945 0.201194853 0.200162977 0.199105293 0.198130518 0.197259381 0.196533367 0.195979178 0.19556734 0.195331395 0.195202827 0.195058078 0.194783747 0.194492429 0.194215089 0.193884984 0.193554774 0.19331257 0.193148375 0.192977771 0.192748651 0.192548871 0.192434162 0.192380652 0.192295954 0.192234471 0.192338958 0.192553699 0.192755729 0.19296734 0.193188787 0.193402767 0.193513766 0.19356741 0.19355543 0.193524241 0.193455055 0.193282425 0.193159968 0.193112165 0.192993194 0.192892998 0.192715168 0.192593724 0.19246529 0.192256287 0.192161933 0.192029655 0.191887498 0.191719145 0.191411287 0.19103092 0.190629303 0.190123826 0.189436972 0.188795373 0.188169718 0.187265188 0.186305478 0.18531248 0.184169799 0.182994127 0.181897119 0.180732697 0.179261804 0.177818716 0.176583886 0.175340995 0.173816085 0.172295377 0.170953289 0.169497401 0.167881832 0.166288763 0.16488941 0.163476542 0.161922857 0.160348684 0.158851832 0.157452583 0.156025082 0.154636219 0.153264984 0.151897222 0.15049845 0.149208978 0.147946581 0.146699727 0.145589113 0.144686922 0.144069433 0.143246025 0.142286956 0.141607553 0.141038328 0.140594676 0.14003697 0.139740154 0.139966309 0.139831215 0.139560789
"38" 0.273316056 0.276701599 0.28011626 0.283471495 0.286857694 0.290211082 0.293584615 0.29697299 0.300300866 0.303670228 0.306966841 0.310286105 0.313628376 0.316972792 0.320272744 0.323544592 0.326861709 0.330112427 0.333350271 0.336625427 0.339889914 0.343139052 0.346356511 0.349527806 0.352713913 0.355879396 0.359039247 0.362153411 0.365283549 0.368383914 0.37142387 0.374478191 0.377568573 0.380540878 0.383517563 0.386490405 0.3893314 0.392216742 0.395077348 0.397916049 0.400678605 0.403397888 0.406041712 0.408713013 0.411351264 0.413859636 0.416423231 0.418890893 0.421374232 0.423766077 0.426082462 0.428396225 0.430663258 0.432807684 0.434934229 0.436942369 0.43892923 0.440883428 0.442754388 0.444619089 0.446419835 0.448206127 0.449990571 0.451717794 0.453345895 0.455038011 0.456733376 0.45838818 0.460035414 0.46180898 0.463522404 0.465239346 0.466960669 0.468625367 0.470264107 0.471771926 0.473411292 0.474964291 0.47647953 0.477958709 0.479374468 0.480643809 0.481868327 0.483087599 0.484086931 0.484924078 0.485681742 0.486251593 0.486555994 0.486995667 0.487198859 0.487412095 0.48738718 0.487546802 0.487681627 0.487640858 0.487502396 0.487599343 0.487677991 0.487717986 0.48786512 0.488255173 0.488599151 0.489005685 0.489660233 0.49037227 0.490957648 0.491904706 0.492478043 0.493302852 0.494350046 0.492914647 0.493843466 0.494817913 0.495803267 0.496774763 0.497816205 0.498844653 0.499819666 0.500810385 0.501799941 0.502819538 0.503910482 0.505012929 0.506004691 0.50703764 0.508075595 0.509123147 0.510223091 0.511320412 0.512303174 0.513226032 0.514184535 0.515217781 0.516246915 0.517228603 0.518121123 0.519090593 0.520088077 0.521030366 0.522029579 0.522986412 0.523880661 0.524791241 0.5256989 0.526550353 0.527398229 0.528239846 0.529042423 0.529798448 0.530500829 0.531239271 0.531953692 0.532613039 0.53318727 0.533759594 0.534297347 0.534780025 0.535164058 0.535560369 0.535914838 0.53619945 0.536387742 0.536528051 0.53663671 0.536637485 0.536564529 0.536418498 0.536136746 0.535747051 0.535210431 0.534431934 0.533454657 0.532216549 0.530677736 0.528928816 0.52698338 0.524705827 0.522231817 0.519596934 0.516815007 0.513870478 0.510803282 0.507633865 0.504413664 0.501182854 0.497980297 0.494873136 0.491882741 0.489092588 0.486476034 0.484078854 0.481946021 0.480008066 0.478246331 0.476611614 0.475084841 0.473635286 0.472246021 0.470854908 0.469475359 0.468150109 0.466902971 0.465728253 0.464667112 0.463742793 0.462969184 0.462348819 0.461859941 0.461500913 0.461307764 0.461250514 0.461303204 0.461507261 0.461896241 0.462447405 0.463160068 0.464052349 0.46508503 0.466273904 0.467615873 0.469011605 0.470434844 0.471866071 0.473307699 0.474722356 0.476061225 0.477302074 0.478510469 0.479643226 0.480691314 0.481659085 0.482594311 0.483458281 0.484243542 0.484931111 0.485567331 0.486172527 0.486690968 0.487149775 0.487577975 0.487948984 0.48828727 0.488606602 0.488914967 0.489258707 0.489629477 0.490009904 0.490408182 0.490870059 0.491331995 0.49179855 0.492287636 0.49275592 0.493179202 0.493532687 0.493784636 0.493965387 0.494061679 0.494115442 0.494063646 0.493875355 0.493548363 0.493097156 0.492524028 0.491830647 0.4909738 0.489950925 0.488755167 0.48737219 0.48583433 0.484167546 0.482351661 0.480359495 0.47815305 0.475771219 0.473280281 0.470685035 0.467951804 0.465101063 0.46219644 0.459257454 0.456339359 0.45339191 0.450503498 0.447682053 0.444934785 0.442267984 0.439638197 0.437074721 0.43458879 0.432189018 0.429857701 0.427612066 0.425491244 0.423405439 0.421317756 0.419180423 0.416895628 0.414363712 0.41147235 0.408186704 0.404491276 0.400309861 0.395642221 0.390588194 0.385146052 0.379283667 0.373077095 0.366590172 0.359860867 0.35296604 0.345945001 0.338913202 0.331987351 0.325233161 0.318739742 0.312594563 0.306844115 0.301547587 0.29668045 0.29228279 0.288387477 0.284970343 0.281951457 0.279325128 0.277105004 0.27526176 0.273720562 0.272461623 0.271459401 0.270676047 0.270074278 0.269610077 0.269261807 0.269003838 0.268797308 0.268625647 0.268490195 0.268385202 0.268325329 0.268338144 0.268418521 0.268588334 0.268868446 0.269272566 0.269783437 0.270404607 0.271128446 0.271922976 0.272769868 0.273676455 0.274615705 0.275583208 0.27656585 0.277557194 0.278568238 0.279594302 0.280628026 0.281682968 0.282746017 0.283831149 0.284923047 0.286000431 0.287066609 0.28813079 0.28919524 0.290222734 0.291202068 0.292152911 0.293059468 0.293940097 0.29476878 0.295534998 0.296294242 0.297004938 0.297638685 0.298235804 0.298819423 0.299378157 0.299911767 0.300456762 0.301008135 0.301548392 0.302093357 0.30262652 0.303154558 0.303686023 0.304204285 0.304691106 0.305169523 0.30565384 0.306122661 0.306586415 0.307044923 0.30750075 0.307979494 0.308471531 0.308982313 0.309507817 0.31005156 0.310645163 0.311289161 0.31198141 0.312725842 0.313538879 0.314436376 0.315396219 0.316398084 0.317449212 0.318537623 0.319638282 0.320730984 0.321831197 0.322926998 0.323996454 0.325066119 0.326102823 0.327101439 0.328050613 0.328942001 0.329781979 0.330579251 0.331322789 0.332009077 0.332638741 0.333201349 0.333708555 0.334142119 0.334489822 0.334738642 0.334879458 0.334872365 0.334721535 0.334422499 0.333962142 0.333380789 0.332692951 0.331888407 0.33101064 0.330109745 0.329239696 0.328435034 0.327707171 0.32706973 0.326507062 0.326002747 0.325512558 0.325036287 0.324582696 0.324130237 0.323666275 0.323159009 0.322611272 0.321999937 0.321289808 0.320514083 0.319697767 0.318884313 0.318089694 0.317297995 0.316524774 0.315740585 0.314933598 0.314053774 0.313067466 0.311983019 0.310843587 0.309728712 0.308717877 0.30787158 0.307240367 0.306833535 0.306635559 0.306607276 0.306720704 0.306948215 0.307187796 0.307378978 0.307516634 0.307567835 0.307511359 0.307376742 0.307171375 0.306907475 0.30659309 0.306227475 0.305836946 0.305437148 0.305017501 0.304618448 0.304262996 0.30396232 0.303720057 0.30355373 0.303453386 0.303374499 0.303327441 0.303284675 0.303254336 0.303249091 0.303257376 0.303296357 0.303386271 0.303537041 0.303729534 0.303964972 0.304267913 0.30458352 0.304930687 0.30529505 0.30563888 0.305978 0.306287378 0.306579024 0.306867063 0.307138681 0.307429016 0.307741404 0.308058023 0.308425277 0.308817267 0.309233874 0.309695274 0.310179114 0.310676962 0.309916019 0.310445309 0.310958505 0.311447769 0.31190747 0.312308013 0.312618017 0.312798142 0.312839448 0.312701583 0.312404096 0.311939716 0.311279923 0.310349613 0.309161067 0.307723612 0.305976808 0.303878516 0.301394671 0.298473775 0.295038074 0.291041672 0.286473215 0.281344712 0.275621861 0.269168258 0.262013018 0.254254818 0.245911077 0.236995429 0.227677271 0.21815443 0.208610609 0.199330911 0.190322176 0.181860894 0.174210608 0.167424455 0.161440939 0.156311199 0.152049348 0.148575544 0.145806774 0.14367421 0.142116517 0.141095489 0.140568867 0.140467748 0.140728891 0.141314104 0.142199308 0.143344223 0.144697949 0.14622882 0.147889748 0.149691358 0.151567996 0.153510138 0.15547438 0.15747571 0.159516424 0.161568299 0.163589135 0.165594906 0.167644933 0.169661283 0.171638042 0.173612833 0.175607488 0.177593514 0.179581776 0.181550816 0.183520347 0.185489357 0.187465683 0.189407736 0.191313684 0.193197221 0.195059463 0.196855351 0.198588669 0.200277373 0.201888561 0.203405276 0.204813063 0.206114545 0.207315728 0.208393902 0.209301308 0.210060522 0.210690275 0.211146429 0.211421281 0.211550847 0.211523145 0.211326748 0.21097149 0.210473746 0.209849626 0.209102944 0.208236679 0.207257375 0.206183672 0.205036819 0.203801572 0.202506378 0.201198757 0.199851617 0.198495716 0.197164506 0.195884332 0.194637164 0.193429127 0.192249119 0.19113636 0.190084815 0.189057425 0.188033238 0.187073395 0.186190337 0.185355723 0.184561253 0.183808655 0.183157697 0.182567954 0.182012901 0.181493372 0.18102321 0.180574626 0.180153653 0.179742411 0.179386899 0.179082513 0.17880556 0.178558946 0.178377151 0.178261176 0.178188398 0.178151235 0.178163499 0.178209662 0.17829442 0.178421676 0.178549424 0.178690344 0.178842247 0.17901881 0.179204017 0.179408371 0.179632708 0.179903433 0.180193484 0.18052642 0.180921435 0.181342632 0.181830555 0.182403192 0.182990968 0.183607906 0.18425101 0.184905484 0.185566232 0.186215371 0.186867625 0.187525451 0.188166901 0.188793913 0.189429075 0.190055147 0.190681905 0.191305518 0.191940248 0.192545325 0.19313556 0.193738267 0.194312513 0.194863871 0.195426032 0.195991397 0.19655329 0.197100595 0.197639719 0.198192343 0.198706016 0.199213788 0.199691325 0.200129226 0.200572878 0.20098944 0.201332882 0.201608613 0.201773763 0.201791316 0.201692447 0.201435938 0.20098424 0.200346246 0.19950977 0.198469624 0.197213426 0.195730329 0.194023877 0.192147821 0.190159887 0.188077405 0.185872048 0.183621526 0.18140097 0.179200485 0.177084237 0.175090611 0.173219159 0.171499327 0.169901922 0.168412253 0.167037949 0.165776998 0.164613694 0.163571283 0.162686735 0.161946997 0.161374226 0.160993338 0.160771266 0.160685197 0.160741344 0.160854906 0.160953805 0.160989106 0.160884559 0.16061081 0.160226688 0.159708306 0.158998117 0.15816389 0.157261923 0.156275347 0.15523079 0.154205903 0.153268546 0.152444437 0.151723087 0.15112564 0.150650948 0.150288761 0.149977207 0.149604827 0.14926298 0.148950532 0.148624688 0.148304775 0.14809446 0.147959888 0.147822529 0.147708148 0.147642717 0.147609606 0.147587851 0.147538304 0.147505417 0.147581398 0.147718355 0.147856057 0.148034781 0.148228064 0.148373246 0.148443505 0.148435682 0.148388416 0.148385152 0.148335144 0.148247197 0.148218349 0.148162231 0.148014963 0.147865951 0.147722617 0.147621408 0.14751558 0.147369862 0.147290319 0.147165731 0.146929532 0.146699339 0.146465018 0.146097839 0.145633891 0.145111963 0.144505322 0.14387767 0.143125266 0.142287433 0.141396821 0.140424937 0.13938117 0.13827391 0.137154773 0.135961235 0.134639844 0.133371383 0.132091761 0.130761996 0.12940757 0.128025696 0.126623899 0.125236526 0.123774499 0.12233229 0.120962076 0.119531699 0.118053608 0.116650745 0.115399629 0.114034064 0.112539843 0.111140274 0.109836884 0.108494252 0.107236795 0.106161267 0.105072193 0.10398867 0.102959089 0.101989716 0.101184979 0.100374065 0.099574581 0.098943286 0.098617673 0.098496877 0.098089539 0.097852573 0.097854644 0.097773097 0.097679846
[truncated: 20,474 more chars]
