# Supplementary material for: A Comparison of Sparse Partial Least Squares and Elastic Net in Wavelength Selection on NIR Spectroscopy Data
Source: Int J Anal Chem. 2019 Aug 1;2019:7314916. doi: 10.1155/2019/7314916 (PMC6699329; doi:10.1155/2019/7314916)
Supplement: Supplementary Materials — Three real data sets used in Section 4. All the data sets are saved as “.txt” format and can be used freely. [file 7314916.f1.zip › 7314916.f1/bwy.txt]

"x"
"1" 57.2
"2" 59.4
"3" 58.3
"4" 57.7
"5" 58.8
"6" 65
"7" 66.6
"8" 65.8
"9" 65.4
"10" 66.2
"11" 71.1
"12" 66.4
"13" 68.7
"14" 69.9
"15" 67.6
"16" 71.7
"17" 71.4
"18" 71.5
"19" 71.6
"20" 71.5
"21" 61.6
"22" 63
"23" 62.3
"24" 62
"25" 62.7
"26" 61.1
"27" 62.2
"28" 61.7
"29" 61.4
"30" 61.9
"31" 65.8
"32" 64.7
"33" 65.3
"34" 65.5
"35" 65
"36" 68.1
"37" 72.4
"38" 70.3
"39" 69.2
"40" 71.3
