# Supplementary material for: A Comparison of Sparse Partial Least Squares and Elastic Net in Wavelength Selection on NIR Spectroscopy Data
Source: Int J Anal Chem. 2019 Aug 1;2019:7314916. doi: 10.1155/2019/7314916 (PMC6699329; doi:10.1155/2019/7314916)
Supplement: Supplementary Materials — Three real data sets used in Section 4. All the data sets are saved as “.txt” format and can be used freely. [file 7314916.f1.zip › 7314916.f1/gasolineX.txt]

-0.050193	-0.045903	-0.042187	-0.037177	-0.033348	-0.031207	-0.030036	-0.031298	-0.034217	-0.036012	-0.039792	-0.043037	-0.047313	-0.048103	-0.050627	-0.05383	-0.054604	-0.056676	-0.058428	-0.060644	-0.061712	-0.063148	-0.06448	-0.065987	-0.066894	-0.068201	-0.069434	-0.069594	-0.071336	-0.071208	-0.071454	-0.071469	-0.071631	-0.070886	-0.07101	-0.070609	-0.070464	-0.070433	-0.069957	-0.070208	-0.070523	-0.070252	-0.06936	-0.068338	-0.066991	-0.065362	-0.063971	-0.06221	-0.060678	-0.059275
-0.044227	-0.039602	-0.035673	-0.030911	-0.026675	-0.023871	-0.022571	-0.02541	-0.02896	-0.03274	-0.036683	-0.040169	-0.044899	-0.046266	-0.048627	-0.052014	-0.053635	-0.055454	-0.056777	-0.059331	-0.060518	-0.062084	-0.063331	-0.065059	-0.065536	-0.066877	-0.067899	-0.067662	-0.06905	-0.068497	-0.068434	-0.067953	-0.067061	-0.066073	-0.065564	-0.065335	-0.064051	-0.063666	-0.062513	-0.061955	-0.060906	-0.059413	-0.058242	-0.056855	-0.055982	-0.055107	-0.054763	-0.054189	-0.054361	-0.054014
-0.046867	-0.04126	-0.036979	-0.031458	-0.02652	-0.023346	-0.021392	-0.024993	-0.029309	-0.03392	-0.038539	-0.042571	-0.047511	-0.048487	-0.050455	-0.053913	-0.055195	-0.056713	-0.057447	-0.05962	-0.060656	-0.061767	-0.062859	-0.064668	-0.065566	-0.06689	-0.068397	-0.068439	-0.070171	-0.070077	-0.070639	-0.070578	-0.070137	-0.069803	-0.069738	-0.070031	-0.069496	-0.069789	-0.069002	-0.069288	-0.069398	-0.068613	-0.067675	-0.066685	-0.065196	-0.063317	-0.061604	-0.059695	-0.058403	-0.056868
-0.046705	-0.04224	-0.038561	-0.034513	-0.030206	-0.02768	-0.026042	-0.02828	-0.03092	-0.034012	-0.037082	-0.040444	-0.044858	-0.046544	-0.048978	-0.052483	-0.054078	-0.055723	-0.056999	-0.059409	-0.060543	-0.061868	-0.062899	-0.064401	-0.064814	-0.065989	-0.06718	-0.066987	-0.068829	-0.069063	-0.069995	-0.070687	-0.070725	-0.070661	-0.071043	-0.071324	-0.070894	-0.071157	-0.070798	-0.07112	-0.071266	-0.07054	-0.069737	-0.068637	-0.067211	-0.065586	-0.064064	-0.062089	-0.060639	-0.059018
-0.050859	-0.045145	-0.041025	-0.036357	-0.032747	-0.031498	-0.031415	-0.034611	-0.037781	-0.040752	-0.04407	-0.04732	-0.051477	-0.05208	-0.054009	-0.057146	-0.058343	-0.059992	-0.060697	-0.062891	-0.063776	-0.065067	-0.065707	-0.067253	-0.06791	-0.069252	-0.070794	-0.070775	-0.072439	-0.072232	-0.072681	-0.072639	-0.072274	-0.071837	-0.071892	-0.071883	-0.071469	-0.071713	-0.071145	-0.071399	-0.071519	-0.070776	-0.069839	-0.068738	-0.067307	-0.065566	-0.064189	-0.062495	-0.06122	-0.059873
-0.048094	-0.042739	-0.038812	-0.034017	-0.030143	-0.02769	-0.026387	-0.028811	-0.031481	-0.034124	-0.037468	-0.040796	-0.045207	-0.046457	-0.048702	-0.05194	-0.053562	-0.055224	-0.056318	-0.05888	-0.060185	-0.061395	-0.06272	-0.064315	-0.065041	-0.066414	-0.067835	-0.067924	-0.069672	-0.069528	-0.069971	-0.070023	-0.069614	-0.069294	-0.069277	-0.069443	-0.068892	-0.069112	-0.06851	-0.068906	-0.06899	-0.068323	-0.067436	-0.066269	-0.065007	-0.063282	-0.061836	-0.060052	-0.058887	-0.057521
-0.049906	-0.044558	-0.040543	-0.035716	-0.031844	-0.029581	-0.027915	-0.030292	-0.03359	-0.037184	-0.041549	-0.045517	-0.049943	-0.050905	-0.052997	-0.056412	-0.057486	-0.059307	-0.060129	-0.062197	-0.063234	-0.064557	-0.065302	-0.066854	-0.067299	-0.068905	-0.069531	-0.070095	-0.071658	-0.071658	-0.071797	-0.072025	-0.071479	-0.071075	-0.07112	-0.071131	-0.07075	-0.070823	-0.07018	-0.07039	-0.070225	-0.069868	-0.068984	-0.067923	-0.066414	-0.06479	-0.063337	-0.061246	-0.060157	-0.058584
-0.049293	-0.043788	-0.039429	-0.034193	-0.029588	-0.026455	-0.025104	-0.028102	-0.031801	-0.036157	-0.040642	-0.044764	-0.049325	-0.050595	-0.052742	-0.05601	-0.057169	-0.058942	-0.059776	-0.061843	-0.06293	-0.064387	-0.065047	-0.066949	-0.067455	-0.069141	-0.069911	-0.070422	-0.071989	-0.072057	-0.072268	-0.072489	-0.072355	-0.071805	-0.071732	-0.071797	-0.071502	-0.071557	-0.070938	-0.071212	-0.070904	-0.070555	-0.069695	-0.068513	-0.067051	-0.065454	-0.063858	-0.061978	-0.060639	-0.05916
-0.049885	-0.044279	-0.040158	-0.034954	-0.031114	-0.02839	-0.027017	-0.029609	-0.032937	-0.036862	-0.041143	-0.044943	-0.049474	-0.050583	-0.052843	-0.056079	-0.056853	-0.058628	-0.059719	-0.061707	-0.06271	-0.063955	-0.06481	-0.066555	-0.067059	-0.068507	-0.069347	-0.069686	-0.071514	-0.071392	-0.071473	-0.07176	-0.071336	-0.07085	-0.070922	-0.070895	-0.070606	-0.070568	-0.069932	-0.070299	-0.070147	-0.069565	-0.068856	-0.067607	-0.066212	-0.064503	-0.063032	-0.061248	-0.060003	-0.058453
-0.051054	-0.045678	-0.041673	-0.036761	-0.033078	-0.030466	-0.029295	-0.031736	-0.034843	-0.038419	-0.042511	-0.046282	-0.050663	-0.05195	-0.053916	-0.057326	-0.05824	-0.060047	-0.060743	-0.062789	-0.063877	-0.064975	-0.065776	-0.067349	-0.068095	-0.069348	-0.070235	-0.070708	-0.072319	-0.072385	-0.07225	-0.072806	-0.072059	-0.071809	-0.071805	-0.071772	-0.071393	-0.071226	-0.071099	-0.07106	-0.071053	-0.070625	-0.070032	-0.068608	-0.067253	-0.065999	-0.064026	-0.062472	-0.060855	-0.059755
-0.052705	-0.047674	-0.04396	-0.039335	-0.035622	-0.033849	-0.032669	-0.035076	-0.037459	-0.040534	-0.044022	-0.047456	-0.051837	-0.05308	-0.055153	-0.058233	-0.059487	-0.061188	-0.062178	-0.064456	-0.065378	-0.066509	-0.067293	-0.068889	-0.069215	-0.070568	-0.071379	-0.071635	-0.073239	-0.073067	-0.073321	-0.073583	-0.073028	-0.072702	-0.072714	-0.072696	-0.072126	-0.072232	-0.071634	-0.071952	-0.071768	-0.071405	-0.070643	-0.069305	-0.068208	-0.066528	-0.064951	-0.063307	-0.062095	-0.060807
-0.050383	-0.044934	-0.041391	-0.036162	-0.032389	-0.030479	-0.028614	-0.031738	-0.034432	-0.036488	-0.041988	-0.045063	-0.049701	-0.051125	-0.05344	-0.057082	-0.057996	-0.059448	-0.060336	-0.062465	-0.063555	-0.064891	-0.065751	-0.067308	-0.068044	-0.069609	-0.070049	-0.070449	-0.072351	-0.072198	-0.072492	-0.072741	-0.072383	-0.071726	-0.071965	-0.071765	-0.071401	-0.071446	-0.070846	-0.071156	-0.070913	-0.070579	-0.069816	-0.068402	-0.067304	-0.065696	-0.063813	-0.062162	-0.060839	-0.05944
-0.047866	-0.043572	-0.039234	-0.033831	-0.029675	-0.026899	-0.02546	-0.028133	-0.031637	-0.035215	-0.040068	-0.043997	-0.048604	-0.050133	-0.052271	-0.055521	-0.057147	-0.058566	-0.059778	-0.06184	-0.06277	-0.064314	-0.064962	-0.066823	-0.067561	-0.06917	-0.06982	-0.070315	-0.072389	-0.072054	-0.072333	-0.072623	-0.072328	-0.071809	-0.071905	-0.071934	-0.07158	-0.071721	-0.071217	-0.071419	-0.071119	-0.070664	-0.069964	-0.068686	-0.067184	-0.065768	-0.063855	-0.062196	-0.060853	-0.059218
-0.046594	-0.041111	-0.036881	-0.031122	-0.026667	-0.023717	-0.021758	-0.024917	-0.029152	-0.033473	-0.038079	-0.042098	-0.046936	-0.048117	-0.050324	-0.053658	-0.054852	-0.056625	-0.057449	-0.059544	-0.060515	-0.061792	-0.062766	-0.064566	-0.065255	-0.066656	-0.067732	-0.068395	-0.070055	-0.070023	-0.070309	-0.070529	-0.070248	-0.069642	-0.069902	-0.069715	-0.069413	-0.069611	-0.069054	-0.06944	-0.06893	-0.068774	-0.067902	-0.066697	-0.065401	-0.063648	-0.061891	-0.060003	-0.058804	-0.057041
-0.04247	-0.036621	-0.03243	-0.026807	-0.021276	-0.018356	-0.016116	-0.01968	-0.024589	-0.029472	-0.034818	-0.039119	-0.043497	-0.045203	-0.047322	-0.050432	-0.051865	-0.05308	-0.053996	-0.056333	-0.057211	-0.058306	-0.059535	-0.061322	-0.062215	-0.063702	-0.065425	-0.065649	-0.067256	-0.067213	-0.06763	-0.067694	-0.06742	-0.067139	-0.067115	-0.067212	-0.066945	-0.067023	-0.06639	-0.066661	-0.066802	-0.066096	-0.06498	-0.063969	-0.06247	-0.060814	-0.058997	-0.056976	-0.055679	-0.053881
-0.048503	-0.04385	-0.040052	-0.035608	-0.031709	-0.029417	-0.027995	-0.030589	-0.032894	-0.035546	-0.038796	-0.041836	-0.046293	-0.047529	-0.049913	-0.053511	-0.054756	-0.056529	-0.057868	-0.060215	-0.06125	-0.06273	-0.063702	-0.065497	-0.066035	-0.067603	-0.068945	-0.068961	-0.070758	-0.070623	-0.071139	-0.070959	-0.070565	-0.070225	-0.070147	-0.070441	-0.069954	-0.070081	-0.069587	-0.06989	-0.070141	-0.069532	-0.06865	-0.067613	-0.066327	-0.064556	-0.063326	-0.061556	-0.060272	-0.058846
-0.052011	-0.046438	-0.042741	-0.037767	-0.033675	-0.031435	-0.030016	-0.032774	-0.035619	-0.03934	-0.043272	-0.04704	-0.051571	-0.052802	-0.054809	-0.058338	-0.059608	-0.061188	-0.062098	-0.064218	-0.065288	-0.066459	-0.067229	-0.068986	-0.069484	-0.070958	-0.071699	-0.072259	-0.073816	-0.073725	-0.074061	-0.074294	-0.073775	-0.073471	-0.073527	-0.073522	-0.073036	-0.073113	-0.072511	-0.072756	-0.072671	-0.072362	-0.071377	-0.070251	-0.068942	-0.067221	-0.065681	-0.06377	-0.062629	-0.061043
-0.055093	-0.049515	-0.045637	-0.040658	-0.036019	-0.033858	-0.032356	-0.035238	-0.03824	-0.042084	-0.046383	-0.049699	-0.054278	-0.055649	-0.057792	-0.06105	-0.062242	-0.063914	-0.064801	-0.067005	-0.067777	-0.069242	-0.070023	-0.071786	-0.072369	-0.073813	-0.074501	-0.074957	-0.076738	-0.076581	-0.076842	-0.076999	-0.076494	-0.076035	-0.076035	-0.076164	-0.07552	-0.075672	-0.075099	-0.075386	-0.075358	-0.074795	-0.073894	-0.072701	-0.071315	-0.069695	-0.067994	-0.066031	-0.064888	-0.063377
-0.055002	-0.049353	-0.045749	-0.040881	-0.036641	-0.034485	-0.032852	-0.035723	-0.038415	-0.041081	-0.044516	-0.047784	-0.052115	-0.053194	-0.055557	-0.059181	-0.060662	-0.062408	-0.063602	-0.065944	-0.06707	-0.068695	-0.069505	-0.071295	-0.072077	-0.073657	-0.074644	-0.074992	-0.0768	-0.076664	-0.076909	-0.077053	-0.076679	-0.076347	-0.076466	-0.076582	-0.076049	-0.076085	-0.075557	-0.075938	-0.075896	-0.075474	-0.074635	-0.07336	-0.072053	-0.070349	-0.06882	-0.066854	-0.065678	-0.064098
-0.053971	-0.048498	-0.044546	-0.039737	-0.035025	-0.032028	-0.030581	-0.032772	-0.036772	-0.040725	-0.045465	-0.049306	-0.053906	-0.055096	-0.057392	-0.06049	-0.061516	-0.063245	-0.064167	-0.066307	-0.067226	-0.068582	-0.069487	-0.071162	-0.071965	-0.073429	-0.075023	-0.0748	-0.076626	-0.076421	-0.077028	-0.076814	-0.076341	-0.076141	-0.076119	-0.076283	-0.07557	-0.07601	-0.075199	-0.075519	-0.075567	-0.074969	-0.073937	-0.072788	-0.071494	-0.069537	-0.068168	-0.066035	-0.064909	-0.063204
-0.056393	-0.051917	-0.048119	-0.042835	-0.03889	-0.037075	-0.035381	-0.03858	-0.041193	-0.04424	-0.047965	-0.051153	-0.05533	-0.057038	-0.059004	-0.062662	-0.063934	-0.065846	-0.067176	-0.069228	-0.070205	-0.071603	-0.072509	-0.07433	-0.075162	-0.076293	-0.076876	-0.07759	-0.07951	-0.079207	-0.079548	-0.079791	-0.079374	-0.079113	-0.07879	-0.079116	-0.078656	-0.078781	-0.078147	-0.078466	-0.07846	-0.077932	-0.077101	-0.075938	-0.074467	-0.072851	-0.071277	-0.069282	-0.068171	-0.066575
-0.041806	-0.037138	-0.03333	-0.028394	-0.024088	-0.02222	-0.020429	-0.02338	-0.026519	-0.029953	-0.034026	-0.037434	-0.041974	-0.043457	-0.045809	-0.049081	-0.050514	-0.052234	-0.053224	-0.055325	-0.056448	-0.057831	-0.058563	-0.060483	-0.061328	-0.062596	-0.063463	-0.064127	-0.066013	-0.065737	-0.065987	-0.066478	-0.06606	-0.065598	-0.065484	-0.065805	-0.065176	-0.065456	-0.064893	-0.065292	-0.065206	-0.064616	-0.063749	-0.062784	-0.061344	-0.059493	-0.058033	-0.056143	-0.055009	-0.053546
-0.056295	-0.050792	-0.047015	-0.041668	-0.037211	-0.035112	-0.03379	-0.036529	-0.039416	-0.043021	-0.047021	-0.050319	-0.054974	-0.056465	-0.058644	-0.06218	-0.063492	-0.06508	-0.066206	-0.068342	-0.069476	-0.070773	-0.071672	-0.07365	-0.074392	-0.075629	-0.076624	-0.077166	-0.07891	-0.078815	-0.07902	-0.079392	-0.078795	-0.078543	-0.078484	-0.078539	-0.077872	-0.078135	-0.077512	-0.07806	-0.078069	-0.07754	-0.076603	-0.075355	-0.074147	-0.072152	-0.07066	-0.068681	-0.067504	-0.066072
-0.056614	-0.050934	-0.047065	-0.042162	-0.037512	-0.035385	-0.03381	-0.036981	-0.03991	-0.043189	-0.047713	-0.051102	-0.055507	-0.056889	-0.059177	-0.062715	-0.063869	-0.065591	-0.066852	-0.069036	-0.069936	-0.071171	-0.072099	-0.07412	-0.074754	-0.075975	-0.076848	-0.077293	-0.079181	-0.078905	-0.079213	-0.079559	-0.079077	-0.078892	-0.078841	-0.078968	-0.078313	-0.078399	-0.077863	-0.078195	-0.078243	-0.07772	-0.076748	-0.07558	-0.074101	-0.072448	-0.070912	-0.06897	-0.067668	-0.066288
-0.056634	-0.050985	-0.047449	-0.042544	-0.037751	-0.035638	-0.034164	-0.03725	-0.040238	-0.043446	-0.047279	-0.050546	-0.055321	-0.056664	-0.058589	-0.062288	-0.063556	-0.065447	-0.066743	-0.068892	-0.069652	-0.07117	-0.072103	-0.073859	-0.07472	-0.075984	-0.077021	-0.07739	-0.079088	-0.078805	-0.079414	-0.079687	-0.079044	-0.078755	-0.078887	-0.078883	-0.078386	-0.078529	-0.077876	-0.078199	-0.078353	-0.077761	-0.076852	-0.075621	-0.074119	-0.072641	-0.071241	-0.069034	-0.067892	-0.066201
-0.053835	-0.048211	-0.043901	-0.039466	-0.034951	-0.032682	-0.031312	-0.033782	-0.03705	-0.040557	-0.044833	-0.048486	-0.054179	-0.055183	-0.057342	-0.059643	-0.060945	-0.062476	-0.063553	-0.06575	-0.066555	-0.067795	-0.0687	-0.070486	-0.071372	-0.072807	-0.073767	-0.073826	-0.075319	-0.075356	-0.075753	-0.075715	-0.075542	-0.07492	-0.075038	-0.074955	-0.074349	-0.074538	-0.074046	-0.074211	-0.074515	-0.074129	-0.072793	-0.071777	-0.070298	-0.068495	-0.067107	-0.06541	-0.063943	-0.06259
-0.054568	-0.049352	-0.045221	-0.040954	-0.036456	-0.034173	-0.033066	-0.035521	-0.038449	-0.041375	-0.045113	-0.048388	-0.053169	-0.054258	-0.056687	-0.059803	-0.061016	-0.062931	-0.063914	-0.066225	-0.067025	-0.068483	-0.069363	-0.070955	-0.071999	-0.073646	-0.074831	-0.074502	-0.076434	-0.076389	-0.076898	-0.076838	-0.076665	-0.076144	-0.07615	-0.076238	-0.075791	-0.075947	-0.075479	-0.075636	-0.075965	-0.075506	-0.074233	-0.073181	-0.071928	-0.070018	-0.068619	-0.066721	-0.065287	-0.064079
-0.056343	-0.05079	-0.046753	-0.042718	-0.038384	-0.036067	-0.034715	-0.037117	-0.040004	-0.042628	-0.046082	-0.049332	-0.054067	-0.05544	-0.057429	-0.060469	-0.061909	-0.063827	-0.065008	-0.067218	-0.068296	-0.069704	-0.070674	-0.072325	-0.073054	-0.074749	-0.075915	-0.07571	-0.077439	-0.077651	-0.07794	-0.077919	-0.077725	-0.077247	-0.077316	-0.077339	-0.07693	-0.076962	-0.076632	-0.076801	-0.077173	-0.076757	-0.075474	-0.074514	-0.073164	-0.071551	-0.069839	-0.06803	-0.066806	-0.065398
-0.055746	-0.050452	-0.046133	-0.042041	-0.037684	-0.03534	-0.034286	-0.03627	-0.039331	-0.042332	-0.04591	-0.049047	-0.054258	-0.055495	-0.057659	-0.060389	-0.061774	-0.063744	-0.064603	-0.067034	-0.067968	-0.069438	-0.070367	-0.072199	-0.073145	-0.074487	-0.075709	-0.075625	-0.077472	-0.077366	-0.07795	-0.077859	-0.077834	-0.077257	-0.077215	-0.077436	-0.076884	-0.076769	-0.076516	-0.076628	-0.076917	-0.076687	-0.075566	-0.074312	-0.072948	-0.071198	-0.069935	-0.067822	-0.066535	-0.06532
-0.056285	-0.051229	-0.047233	-0.043306	-0.038566	-0.036586	-0.035222	-0.037604	-0.040532	-0.043434	-0.046881	-0.050182	-0.055335	-0.056295	-0.058665	-0.061363	-0.062564	-0.064437	-0.065459	-0.067668	-0.068755	-0.070101	-0.071131	-0.072999	-0.073794	-0.075072	-0.076341	-0.076227	-0.077843	-0.077858	-0.07829	-0.0781	-0.078094	-0.077466	-0.077674	-0.077509	-0.077078	-0.07738	-0.076783	-0.07692	-0.077329	-0.076976	-0.075611	-0.07469	-0.073429	-0.071437	-0.070169	-0.068434	-0.067212	-0.065771
-0.055856	-0.050983	-0.047003	-0.042624	-0.038003	-0.035975	-0.034708	-0.036853	-0.039795	-0.04289	-0.046445	-0.049663	-0.054845	-0.055789	-0.058012	-0.060775	-0.061967	-0.06389	-0.065081	-0.067479	-0.068548	-0.069983	-0.070765	-0.072517	-0.073461	-0.074743	-0.075912	-0.075925	-0.077565	-0.077958	-0.078156	-0.078033	-0.078014	-0.077262	-0.077325	-0.077284	-0.076902	-0.076953	-0.076661	-0.076949	-0.077216	-0.076846	-0.075516	-0.074423	-0.073117	-0.071299	-0.069898	-0.068103	-0.066852	-0.06547
-0.054979	-0.049543	-0.045299	-0.041173	-0.036667	-0.034132	-0.033121	-0.03513	-0.037817	-0.04024	-0.043501	-0.046507	-0.051635	-0.052831	-0.055225	-0.058072	-0.059604	-0.061395	-0.06261	-0.065076	-0.066175	-0.067523	-0.06875	-0.070652	-0.071799	-0.073174	-0.074378	-0.074368	-0.076168	-0.076458	-0.076677	-0.076728	-0.076759	-0.076012	-0.076131	-0.076307	-0.075903	-0.075994	-0.07571	-0.075813	-0.076064	-0.075929	-0.074629	-0.073521	-0.07241	-0.070449	-0.068971	-0.067157	-0.065976	-0.064561
-0.056744	-0.05164	-0.047625	-0.043418	-0.03872	-0.036322	-0.035358	-0.037381	-0.040105	-0.042422	-0.045357	-0.048468	-0.053865	-0.054703	-0.05748	-0.060095	-0.061581	-0.063461	-0.0646	-0.06702	-0.068061	-0.069747	-0.070819	-0.072646	-0.073825	-0.075156	-0.076452	-0.076297	-0.07806	-0.078419	-0.078616	-0.078506	-0.078707	-0.077838	-0.078023	-0.078148	-0.077752	-0.07796	-0.077684	-0.077682	-0.078193	-0.077849	-0.076399	-0.075478	-0.074276	-0.072376	-0.070895	-0.069218	-0.067881	-0.066624
-0.055116	-0.049883	-0.045198	-0.041241	-0.036557	-0.034154	-0.033351	-0.035328	-0.038093	-0.040302	-0.043375	-0.046581	-0.051438	-0.052836	-0.055087	-0.058077	-0.059645	-0.061439	-0.062633	-0.06509	-0.066183	-0.067685	-0.068998	-0.070813	-0.071748	-0.07328	-0.074593	-0.074571	-0.076287	-0.076785	-0.076921	-0.076805	-0.076941	-0.07614	-0.076209	-0.076329	-0.075926	-0.076025	-0.075649	-0.075777	-0.076119	-0.075969	-0.074706	-0.073638	-0.072334	-0.070367	-0.068971	-0.067373	-0.06598	-0.064548
-0.055431	-0.04961	-0.046254	-0.041308	-0.037308	-0.034262	-0.034115	-0.035523	-0.03878	-0.04058	-0.043951	-0.047134	-0.051798	-0.053608	-0.055447	-0.058775	-0.059679	-0.061909	-0.063072	-0.065555	-0.066623	-0.06819	-0.069618	-0.071239	-0.072503	-0.073567	-0.074972	-0.074593	-0.076788	-0.076888	-0.077175	-0.07701	-0.077195	-0.076544	-0.076279	-0.076964	-0.076196	-0.076664	-0.075814	-0.076348	-0.076274	-0.076474	-0.075058	-0.073605	-0.072847	-0.070532	-0.069824	-0.067281	-0.066633	-0.064714
-0.054786	-0.049772	-0.045728	-0.041781	-0.037103	-0.034873	-0.032462	-0.035916	-0.038543	-0.043005	-0.046241	-0.050096	-0.05494	-0.055792	-0.058037	-0.061413	-0.062047	-0.064309	-0.06547	-0.067386	-0.06847	-0.069807	-0.070565	-0.072376	-0.073187	-0.074446	-0.075159	-0.075617	-0.077313	-0.077014	-0.077529	-0.077422	-0.077177	-0.076848	-0.076692	-0.076898	-0.076187	-0.076589	-0.075681	-0.076172	-0.07636	-0.075847	-0.074862	-0.073606	-0.072467	-0.070212	-0.068755	-0.067178	-0.065406	-0.064419
-0.052696	-0.047364	-0.043219	-0.039882	-0.035381	-0.032813	-0.031885	-0.034334	-0.037243	-0.038527	-0.041641	-0.045106	-0.049352	-0.050923	-0.053518	-0.056056	-0.057514	-0.05953	-0.060564	-0.063328	-0.064621	-0.065713	-0.067176	-0.068554	-0.069649	-0.071006	-0.072013	-0.071934	-0.073738	-0.074175	-0.074282	-0.073822	-0.074479	-0.073385	-0.073568	-0.073806	-0.073372	-0.073167	-0.073067	-0.073146	-0.073211	-0.073308	-0.071919	-0.070679	-0.069482	-0.067755	-0.066393	-0.064577	-0.0633	-0.061914
-0.051488	-0.04571	-0.041979	-0.037985	-0.034024	-0.030727	-0.029478	-0.031468	-0.036109	-0.038571	-0.043427	-0.046328	-0.051238	-0.053215	-0.054823	-0.057399	-0.059207	-0.060727	-0.062415	-0.063952	-0.064397	-0.065967	-0.067386	-0.068673	-0.069398	-0.07083	-0.071763	-0.071431	-0.07372	-0.073307	-0.07354	-0.073601	-0.073696	-0.072907	-0.072871	-0.072811	-0.072732	-0.07259	-0.072029	-0.072168	-0.072397	-0.072406	-0.071245	-0.069813	-0.068414	-0.066849	-0.065453	-0.063767	-0.062134	-0.060787
-0.050822	-0.04534	-0.040816	-0.036766	-0.031458	-0.029078	-0.027847	-0.029164	-0.034641	-0.037432	-0.042637	-0.046195	-0.051316	-0.053057	-0.054823	-0.057548	-0.059018	-0.060352	-0.062272	-0.063689	-0.064089	-0.065837	-0.067138	-0.068692	-0.069554	-0.07119	-0.072062	-0.07128	-0.073999	-0.073684	-0.073904	-0.073899	-0.074219	-0.073238	-0.073201	-0.073473	-0.073151	-0.072775	-0.072562	-0.072953	-0.072958	-0.072732	-0.071443	-0.070188	-0.06874	-0.066973	-0.065508	-0.063741	-0.06232	-0.060853
-0.053711	-0.04782	-0.043375	-0.03973	-0.035277	-0.03209	-0.031238	-0.033153	-0.037076	-0.040173	-0.044571	-0.048289	-0.053171	-0.054698	-0.056797	-0.059183	-0.060779	-0.062486	-0.063933	-0.065521	-0.066325	-0.067737	-0.068842	-0.070155	-0.071157	-0.072484	-0.073223	-0.072757	-0.075225	-0.075052	-0.075262	-0.074938	-0.075442	-0.074469	-0.074743	-0.074758	-0.074234	-0.074037	-0.074084	-0.074267	-0.074092	-0.074063	-0.072705	-0.071538	-0.070206	-0.068495	-0.066959	-0.065127	-0.064016	-0.062373
-0.052652	-0.046447	-0.043614	-0.040247	-0.035748	-0.033943	-0.031325	-0.035319	-0.037886	-0.040906	-0.044449	-0.04788	-0.0522	-0.052808	-0.055194	-0.058302	-0.059721	-0.061675	-0.062203	-0.064349	-0.065567	-0.066698	-0.067212	-0.068625	-0.069369	-0.070932	-0.07219	-0.072061	-0.073601	-0.07333	-0.073894	-0.073569	-0.073417	-0.072925	-0.072879	-0.073028	-0.072475	-0.072439	-0.072232	-0.072507	-0.072572	-0.072066	-0.070973	-0.069819	-0.068466	-0.066982	-0.065562	-0.063638	-0.062595	-0.061004
-0.050152	-0.044052	-0.04055	-0.036536	-0.032156	-0.03009	-0.028906	-0.031714	-0.034768	-0.037636	-0.041951	-0.045251	-0.049773	-0.050762	-0.052852	-0.05606	-0.057057	-0.058922	-0.05959	-0.062114	-0.063253	-0.064057	-0.065304	-0.066316	-0.067351	-0.069183	-0.070087	-0.070029	-0.071709	-0.071529	-0.072102	-0.071717	-0.071626	-0.071212	-0.071249	-0.071321	-0.070716	-0.070652	-0.07039	-0.070703	-0.070747	-0.070458	-0.069289	-0.068089	-0.066892	-0.065213	-0.063906	-0.06202	-0.060837	-0.059533
-0.045382	-0.040226	-0.036527	-0.032673	-0.028697	-0.026225	-0.024899	-0.026252	-0.031305	-0.033514	-0.037953	-0.041074	-0.046163	-0.047887	-0.049345	-0.052579	-0.053869	-0.05468	-0.056108	-0.058508	-0.05894	-0.060571	-0.061485	-0.063547	-0.064211	-0.065642	-0.066771	-0.066505	-0.068387	-0.068464	-0.068783	-0.068668	-0.068727	-0.068134	-0.067988	-0.068332	-0.067801	-0.067755	-0.06718	-0.067599	-0.067936	-0.067445	-0.06615	-0.065119	-0.06373	-0.062086	-0.060644	-0.058908	-0.057815	-0.05612
-0.050142	-0.044155	-0.040605	-0.036775	-0.032357	-0.029566	-0.028514	-0.029725	-0.033475	-0.035601	-0.039133	-0.042325	-0.046617	-0.048656	-0.05071	-0.053954	-0.055358	-0.056949	-0.05821	-0.060699	-0.061197	-0.063219	-0.064713	-0.066362	-0.067464	-0.069011	-0.069959	-0.069196	-0.071624	-0.071905	-0.072012	-0.071681	-0.072178	-0.07136	-0.071244	-0.071749	-0.071235	-0.071101	-0.070972	-0.071198	-0.071506	-0.070984	-0.069853	-0.068893	-0.067381	-0.065734	-0.064451	-0.062638	-0.061326	-0.05992
-0.055431	-0.049375	-0.04619	-0.042031	-0.037362	-0.035388	-0.033041	-0.036786	-0.03945	-0.042702	-0.046633	-0.050236	-0.054882	-0.056005	-0.057955	-0.060745	-0.061941	-0.063506	-0.064531	-0.066757	-0.068002	-0.069049	-0.069755	-0.071439	-0.071987	-0.073734	-0.07456	-0.07473	-0.076319	-0.076265	-0.076793	-0.076796	-0.076405	-0.075859	-0.075983	-0.076012	-0.075225	-0.075659	-0.075079	-0.075327	-0.075437	-0.074778	-0.073887	-0.072851	-0.071207	-0.069542	-0.067855	-0.066013	-0.0647	-0.063569
-0.062839	-0.056232	-0.053075	-0.048133	-0.044493	-0.041588	-0.040467	-0.043202	-0.046477	-0.049311	-0.053121	-0.057098	-0.062088	-0.062803	-0.065006	-0.06786	-0.068047	-0.070023	-0.07097	-0.072982	-0.073707	-0.075699	-0.07601	-0.07806	-0.078758	-0.080164	-0.080958	-0.081035	-0.082856	-0.082576	-0.083017	-0.082745	-0.082797	-0.082355	-0.082227	-0.081972	-0.082198	-0.08173	-0.081676	-0.081344	-0.082231	-0.080868	-0.08055	-0.078745	-0.077696	-0.075856	-0.074587	-0.072527	-0.07165	-0.070243
-0.060146	-0.054662	-0.051013	-0.046707	-0.042162	-0.040352	-0.038058	-0.041425	-0.044844	-0.047471	-0.051406	-0.055822	-0.06026	-0.060851	-0.063578	-0.065948	-0.067429	-0.068502	-0.069582	-0.071447	-0.072711	-0.073638	-0.074488	-0.076379	-0.077546	-0.078423	-0.078743	-0.07914	-0.080917	-0.080911	-0.080714	-0.081171	-0.080872	-0.080434	-0.080343	-0.079998	-0.080008	-0.080109	-0.079496	-0.079727	-0.079961	-0.079348	-0.078285	-0.077225	-0.075847	-0.074142	-0.072576	-0.070582	-0.069463	-0.06831
-0.059905	-0.053893	-0.049825	-0.045788	-0.039896	-0.037613	-0.035854	-0.039694	-0.043639	-0.046829	-0.051111	-0.055318	-0.059971	-0.060598	-0.062671	-0.065229	-0.066621	-0.068144	-0.069029	-0.070978	-0.072031	-0.072782	-0.074082	-0.075567	-0.076568	-0.078014	-0.07861	-0.078888	-0.080499	-0.080811	-0.080394	-0.081021	-0.080752	-0.08025	-0.080214	-0.079901	-0.079892	-0.079907	-0.07921	-0.079622	-0.079846	-0.079487	-0.077901	-0.076929	-0.075606	-0.07382	-0.072016	-0.070303	-0.069246	-0.068054
-0.060446	-0.054912	-0.051417	-0.046888	-0.042582	-0.040267	-0.038564	-0.041482	-0.045056	-0.047595	-0.051649	-0.055624	-0.060345	-0.061197	-0.0634	-0.065903	-0.066904	-0.068419	-0.069617	-0.071492	-0.07248	-0.073776	-0.074731	-0.076412	-0.077514	-0.078458	-0.078902	-0.079334	-0.081102	-0.080987	-0.080975	-0.081364	-0.080949	-0.080847	-0.080629	-0.080316	-0.08015	-0.080252	-0.079671	-0.079935	-0.080191	-0.079634	-0.078521	-0.077514	-0.076134	-0.074091	-0.072674	-0.070996	-0.069862	-0.068357
-0.060961	-0.056118	-0.052393	-0.048156	-0.043868	-0.041965	-0.04013	-0.04301	-0.046227	-0.048838	-0.052946	-0.056559	-0.061096	-0.061928	-0.064101	-0.066349	-0.067928	-0.069517	-0.070404	-0.072173	-0.073489	-0.074515	-0.075492	-0.077012	-0.078189	-0.079227	-0.079608	-0.079966	-0.081693	-0.0818	-0.081454	-0.081964	-0.081678	-0.081183	-0.081119	-0.080995	-0.080848	-0.080876	-0.080456	-0.080735	-0.080698	-0.080631	-0.079309	-0.078365	-0.076867	-0.07494	-0.073487	-0.071933	-0.070785	-0.069339
-0.052634	-0.046971	-0.043205	-0.039538	-0.034724	-0.032414	-0.02982	-0.03367	-0.036481	-0.040107	-0.04433	-0.047534	-0.052034	-0.052498	-0.055649	-0.058979	-0.059943	-0.061868	-0.062977	-0.064831	-0.066027	-0.067218	-0.068254	-0.069899	-0.070693	-0.071956	-0.072549	-0.073324	-0.075204	-0.075195	-0.07523	-0.075484	-0.075131	-0.07473	-0.074773	-0.07458	-0.074087	-0.074339	-0.073742	-0.073959	-0.074229	-0.073608	-0.072673	-0.071525	-0.070252	-0.068605	-0.067068	-0.065286	-0.063975	-0.062573
-0.0527	-0.047331	-0.043577	-0.040344	-0.035613	-0.033652	-0.031383	-0.034717	-0.0375	-0.040242	-0.043958	-0.047056	-0.051499	-0.052209	-0.054662	-0.058423	-0.059167	-0.061363	-0.062341	-0.06464	-0.065564	-0.06689	-0.067413	-0.069512	-0.069796	-0.071377	-0.072178	-0.072654	-0.074303	-0.074184	-0.074437	-0.074593	-0.074261	-0.073793	-0.074	-0.073934	-0.073398	-0.073687	-0.073149	-0.073275	-0.073434	-0.072921	-0.071861	-0.070808	-0.069523	-0.068053	-0.066463	-0.064664	-0.06363	-0.062201
-0.053394	-0.04799	-0.044082	-0.04069	-0.036469	-0.033663	-0.031475	-0.03474	-0.037418	-0.040692	-0.044748	-0.048034	-0.052443	-0.053603	-0.055775	-0.059413	-0.060384	-0.062054	-0.063307	-0.065562	-0.066717	-0.067796	-0.068512	-0.070317	-0.070813	-0.071966	-0.073118	-0.073577	-0.074969	-0.074897	-0.075274	-0.075213	-0.074837	-0.074202	-0.074437	-0.074551	-0.07382	-0.073677	-0.073463	-0.073523	-0.073743	-0.073317	-0.072295	-0.071204	-0.069838	-0.068259	-0.0671	-0.064975	-0.063831	-0.062549
-0.054134	-0.048487	-0.045171	-0.041012	-0.035553	-0.034104	-0.031523	-0.034866	-0.0372	-0.038979	-0.042826	-0.046231	-0.050822	-0.051837	-0.054924	-0.058384	-0.059882	-0.060961	-0.063166	-0.065417	-0.06649	-0.068089	-0.069072	-0.071629	-0.072573	-0.073863	-0.074364	-0.075119	-0.077388	-0.077197	-0.077073	-0.077821	-0.077157	-0.076906	-0.07693	-0.076889	-0.07598	-0.076474	-0.076073	-0.076195	-0.076498	-0.07615	-0.074968	-0.073937	-0.072581	-0.070752	-0.069231	-0.067451	-0.066192	-0.064999
-0.049623	-0.044263	-0.041154	-0.037335	-0.032926	-0.030602	-0.028713	-0.032058	-0.034363	-0.03544	-0.039802	-0.042433	-0.046782	-0.047554	-0.050767	-0.054003	-0.054813	-0.056336	-0.058315	-0.060818	-0.062075	-0.063767	-0.064616	-0.066462	-0.067227	-0.068925	-0.069666	-0.070228	-0.072081	-0.072094	-0.072259	-0.07208	-0.072171	-0.071479	-0.071448	-0.071744	-0.071078	-0.071213	-0.07056	-0.070813	-0.071175	-0.070857	-0.06956	-0.068704	-0.067327	-0.0656	-0.064415	-0.062843	-0.061461	-0.060268
-0.046884	-0.04236	-0.038683	-0.035291	-0.030175	-0.027898	-0.026519	-0.029413	-0.032182	-0.034033	-0.037016	-0.039604	-0.044603	-0.04583	-0.048799	-0.051911	-0.053445	-0.055557	-0.056485	-0.059301	-0.06043	-0.06168	-0.063075	-0.064269	-0.065581	-0.067312	-0.068149	-0.068359	-0.070165	-0.070234	-0.070979	-0.070863	-0.070359	-0.069886	-0.070004	-0.070441	-0.07027	-0.069922	-0.06921	-0.069609	-0.070052	-0.069687	-0.068732	-0.067382	-0.065812	-0.06454	-0.062965	-0.061657	-0.06026	-0.058708
-0.055555	-0.049867	-0.045942	-0.042266	-0.037195	-0.034837	-0.031842	-0.036051	-0.038897	-0.042842	-0.045712	-0.049276	-0.054354	-0.05528	-0.057617	-0.061558	-0.062477	-0.06385	-0.06548	-0.067151	-0.068302	-0.069968	-0.070707	-0.072725	-0.07377	-0.074929	-0.075505	-0.076406	-0.078295	-0.078161	-0.07833	-0.07845	-0.077991	-0.077876	-0.077774	-0.07793	-0.076906	-0.077384	-0.07694	-0.077186	-0.077274	-0.077192	-0.075741	-0.074752	-0.073468	-0.071696	-0.070088	-0.068086	-0.066937	-0.065779
-0.053693	-0.04802	-0.044677	-0.041021	-0.036254	-0.034531	-0.032428	-0.035264	-0.038362	-0.040816	-0.044461	-0.047152	-0.051256	-0.05301	-0.055236	-0.058745	-0.060435	-0.06162	-0.062893	-0.065417	-0.066244	-0.06786	-0.068487	-0.070133	-0.071032	-0.07236	-0.073858	-0.074061	-0.07571	-0.075839	-0.076049	-0.076001	-0.07581	-0.074975	-0.075349	-0.075294	-0.074698	-0.075101	-0.074348	-0.074592	-0.075148	-0.07456	-0.073624	-0.072581	-0.07096	-0.069683	-0.06785	-0.066005	-0.065183	-0.063083
-0.056311	-0.051231	-0.047483	-0.044605	-0.039404	-0.037526	-0.034336	-0.037852	-0.041023	-0.044488	-0.048675	-0.051964	-0.056449	-0.057032	-0.059608	-0.063234	-0.063776	-0.065895	-0.066979	-0.069155	-0.070064	-0.071662	-0.072135	-0.073812	-0.074959	-0.075825	-0.076751	-0.076959	-0.078707	-0.078615	-0.078859	-0.078795	-0.078487	-0.077941	-0.078171	-0.078043	-0.07705	-0.077396	-0.076658	-0.077172	-0.077514	-0.077247	-0.075701	-0.074726	-0.073559	-0.072049	-0.070242	-0.06848	-0.067221	-0.066009
-0.058805	-0.053311	-0.049543	-0.045053	-0.040598	-0.038965	-0.036749	-0.040284	-0.04208	-0.045058	-0.049194	-0.052106	-0.056853	-0.058258	-0.060359	-0.063644	-0.065566	-0.067019	-0.068453	-0.070733	-0.071175	-0.072653	-0.07332	-0.075405	-0.076334	-0.077533	-0.078346	-0.07898	-0.080729	-0.080462	-0.080889	-0.081391	-0.080324	-0.080124	-0.07976	-0.079823	-0.079516	-0.079988	-0.078474	-0.07898	-0.079241	-0.079237	-0.07811	-0.077441	-0.075079	-0.073671	-0.072021	-0.070123	-0.06939	-0.068613
[truncated: 351 more columns]
