# Supplementary material for: A Comparison of Sparse Partial Least Squares and Elastic Net in Wavelength Selection on NIR Spectroscopy Data
Source: Int J Anal Chem. 2019 Aug 1;2019:7314916. doi: 10.1155/2019/7314916 (PMC6699329; doi:10.1155/2019/7314916)
Supplement: Supplementary Materials — Three real data sets used in Section 4. All the data sets are saved as “.txt” format and can be used freely. [file 7314916.f1.zip › 7314916.f1/gasoliney.txt]

85.3
85.25
88.45
83.4
87.9
85.5
88.9
88.3
88.7
88.45
88.75
88.25
87.3
88
88.7
85.5
88.65
88.75
85.4
88.6
87
87.15
87.05
87.25
86.85
88.65
86.6
86
86.1
86.5
86.3
84.4
84.7
84.6
84.5
88.1
85.25
88.4
88.2
88.4
88.55
88.35
88.2
85.3
88.5
88.25
88
88.85
88.45
88.7
88.1
87.6
88.35
85.1
85.1
84.7
87.2
86.6
89.6
87.1
