# Supplementary material for: A Comparison of Sparse Partial Least Squares and Elastic Net in Wavelength Selection on NIR Spectroscopy Data
Source: Int J Anal Chem. 2019 Aug 1;2019:7314916. doi: 10.1155/2019/7314916 (PMC6699329; doi:10.1155/2019/7314916)
Supplement: Supplementary Materials — Three real data sets used in Section 4. All the data sets are saved as “.txt” format and can be used freely. [file 7314916.f1.zip › 7314916.f1/m5spec.txt]

0.044495	0.044383	0.044258	0.044212	0.044184	0.044229	0.044323	0.044451	0.044668	0.045067	0.045552	0.046264	0.047143	0.048298	0.049758	0.051425	0.053479	0.055774	0.058278	0.061135	0.064071	0.06724	0.070612	0.073918	0.077467	0.081006	0.084375	0.087863	0.091143	0.094318	0.097417	0.10022	0.10297	0.10558	0.10789	0.11024	0.11251	0.11474	0.11701	0.11918	0.12144	0.12366	0.12569	0.12772	0.12954	0.13115	0.13256	0.1337	0.13461	0.13527
0.046504	0.046349	0.04623	0.046205	0.046183	0.046192	0.046329	0.046497	0.046735	0.047097	0.047586	0.048299	0.049155	0.050286	0.051732	0.053413	0.055436	0.057746	0.060263	0.063113	0.066054	0.069216	0.07261	0.075939	0.079444	0.082985	0.086358	0.089836	0.09309	0.096208	0.099299	0.10211	0.1048	0.10739	0.1097	0.11206	0.11432	0.11648	0.11877	0.12093	0.12315	0.12536	0.12734	0.12935	0.13114	0.13271	0.13412	0.13522	0.13612	0.13673
0.046958	0.046817	0.046663	0.046601	0.046599	0.046639	0.046701	0.046817	0.047045	0.047419	0.047871	0.048529	0.049338	0.050438	0.051804	0.05338	0.055311	0.05748	0.059844	0.062534	0.065313	0.068273	0.071453	0.074589	0.077938	0.081278	0.084463	0.087774	0.090899	0.093915	0.096875	0.099581	0.10223	0.10477	0.10702	0.10933	0.11157	0.11373	0.11597	0.11808	0.12027	0.12241	0.12435	0.12629	0.12802	0.12953	0.13085	0.1319	0.13272	0.13329
0.045461	0.045321	0.045205	0.045159	0.045152	0.045188	0.0453	0.045463	0.045664	0.046025	0.046476	0.047113	0.047907	0.048964	0.050277	0.051816	0.053656	0.055764	0.058047	0.060627	0.063315	0.066193	0.069257	0.072302	0.075525	0.078746	0.081825	0.085006	0.088021	0.090918	0.093775	0.096392	0.098886	0.10131	0.10345	0.10562	0.10775	0.10976	0.11188	0.11391	0.11597	0.11803	0.11988	0.12173	0.1234	0.12483	0.12613	0.12714	0.12793	0.1285
0.053948	0.053786	0.05365	0.053613	0.053576	0.053623	0.053759	0.053915	0.054199	0.054589	0.055134	0.055909	0.056855	0.058158	0.059772	0.061657	0.063956	0.066523	0.069373	0.072595	0.075902	0.079483	0.083284	0.087031	0.090997	0.094953	0.09877	0.10271	0.1064	0.11	0.11348	0.11666	0.11975	0.12269	0.12532	0.128	0.13058	0.13308	0.13565	0.13811	0.14064	0.14311	0.14538	0.14763	0.14966	0.15141	0.15296	0.15421	0.15518	0.15587
0.052083	0.051876	0.051773	0.051748	0.051691	0.051755	0.051884	0.052067	0.052362	0.052718	0.053267	0.05402	0.054938	0.056202	0.057773	0.059613	0.061842	0.06433	0.067103	0.070212	0.073427	0.076909	0.080595	0.084224	0.088064	0.091916	0.095623	0.09944	0.10307	0.10653	0.10992	0.113	0.11598	0.11882	0.12135	0.12396	0.12644	0.12883	0.13133	0.1337	0.13615	0.13856	0.14074	0.14293	0.14489	0.14661	0.14811	0.14931	0.15026	0.15094
0.056716	0.056517	0.056404	0.056349	0.056309	0.056381	0.056475	0.056662	0.056973	0.057346	0.057902	0.05868	0.059612	0.06092	0.062512	0.064389	0.066656	0.069186	0.072004	0.075136	0.078368	0.081872	0.085567	0.089216	0.093059	0.096904	0.10062	0.10442	0.10805	0.11155	0.11497	0.11809	0.12109	0.12398	0.12653	0.12914	0.13165	0.13409	0.13661	0.139	0.14149	0.14391	0.14612	0.14831	0.15028	0.15198	0.15346	0.15467	0.15559	0.15624
0.056241	0.056031	0.055933	0.055881	0.055852	0.055925	0.056026	0.056258	0.056557	0.056938	0.057535	0.058312	0.059294	0.060635	0.06228	0.064225	0.066576	0.069201	0.072099	0.075348	0.078698	0.082317	0.086158	0.089938	0.093915	0.097901	0.10174	0.1057	0.10942	0.11304	0.1166	0.11983	0.12296	0.12593	0.12861	0.13132	0.13392	0.13647	0.13909	0.14159	0.14416	0.14668	0.14897	0.15125	0.15328	0.15504	0.15659	0.15781	0.15878	0.15945
0.048786	0.048587	0.048485	0.048445	0.048431	0.048514	0.048621	0.048803	0.049056	0.049391	0.049899	0.050564	0.051399	0.05253	0.053945	0.055588	0.057571	0.059806	0.062255	0.065019	0.067826	0.070904	0.074149	0.077339	0.08073	0.084127	0.087404	0.090766	0.093928	0.097015	0.099997	0.10274	0.10538	0.10788	0.11012	0.11239	0.11458	0.11669	0.11889	0.12099	0.12316	0.12529	0.12721	0.12913	0.13084	0.13234	0.13365	0.13468	0.13549	0.13606
0.049272	0.04905	0.048967	0.048934	0.048904	0.048976	0.04909	0.049289	0.049546	0.049878	0.050379	0.051057	0.051897	0.053033	0.05446	0.056123	0.058128	0.060395	0.062899	0.06571	0.068609	0.071754	0.075084	0.078367	0.081833	0.085298	0.088671	0.09213	0.095359	0.098493	0.10156	0.10436	0.10707	0.10965	0.11196	0.11432	0.11659	0.11878	0.12105	0.12324	0.12546	0.12766	0.12965	0.13163	0.1334	0.13495	0.13631	0.13738	0.13823	0.13882
0.054434	0.054277	0.054161	0.054097	0.054078	0.054112	0.054201	0.054409	0.054741	0.055174	0.055824	0.056725	0.057833	0.059348	0.06122	0.063417	0.066058	0.069049	0.072348	0.07607	0.079928	0.084041	0.088447	0.09281	0.097419	0.10201	0.10644	0.11101	0.11533	0.11951	0.12356	0.12729	0.13091	0.13432	0.13736	0.14051	0.14348	0.14639	0.14935	0.15221	0.15515	0.15804	0.16072	0.16336	0.16577	0.16788	0.16976	0.17125	0.17244	0.17333
0.054668	0.054542	0.054401	0.054326	0.054313	0.054336	0.0544	0.054565	0.054876	0.05529	0.055911	0.05677	0.05781	0.059272	0.061047	0.06316	0.065709	0.068572	0.071726	0.075295	0.078995	0.082937	0.087142	0.091304	0.095706	0.10011	0.10431	0.10866	0.11277	0.11674	0.12058	0.1241	0.12755	0.13081	0.13373	0.13673	0.1396	0.14241	0.14527	0.14802	0.15085	0.15364	0.15618	0.15869	0.16098	0.163	0.16476	0.16616	0.1673	0.16812
0.039546	0.039365	0.039259	0.03922	0.039178	0.039214	0.039275	0.039438	0.039664	0.03999	0.040496	0.041175	0.042035	0.043208	0.044624	0.046342	0.048383	0.050707	0.053256	0.056157	0.05917	0.062355	0.065819	0.069213	0.072801	0.076422	0.079873	0.083433	0.086772	0.089992	0.093105	0.095945	0.098718	0.10128	0.1036	0.10599	0.10828	0.11051	0.11281	0.11504	0.11732	0.11958	0.12165	0.12371	0.1256	0.12725	0.12873	0.12992	0.13087	0.13158
0.040965	0.040792	0.040706	0.040642	0.040633	0.04067	0.040751	0.040927	0.04117	0.041557	0.042084	0.042837	0.043758	0.044991	0.046523	0.048328	0.050512	0.052962	0.055653	0.058731	0.061888	0.065282	0.068889	0.072472	0.076248	0.08003	0.083658	0.087385	0.090908	0.09429	0.097565	0.10056	0.10346	0.1062	0.10862	0.11111	0.1135	0.11582	0.11821	0.12051	0.12289	0.12523	0.12738	0.12954	0.13151	0.13323	0.13475	0.13598	0.13699	0.13772
0.053086	0.05295	0.052838	0.052786	0.052789	0.052849	0.052933	0.053138	0.053467	0.053898	0.054551	0.055393	0.056459	0.057901	0.059654	0.061739	0.064211	0.067029	0.070087	0.073559	0.077162	0.080951	0.085034	0.089053	0.093317	0.097579	0.10165	0.10588	0.10985	0.11371	0.11743	0.12085	0.1242	0.12735	0.13015	0.13302	0.13579	0.13846	0.14121	0.14385	0.14655	0.14923	0.15164	0.15406	0.15623	0.15815	0.15984	0.16118	0.16225	0.16303
0.054238	0.054094	0.053975	0.053923	0.053915	0.054004	0.054078	0.054307	0.054652	0.055107	0.055788	0.056676	0.057799	0.059288	0.061144	0.063321	0.065921	0.068875	0.072081	0.075721	0.079478	0.083478	0.087768	0.091959	0.096429	0.10086	0.10512	0.10952	0.11366	0.11768	0.12154	0.12511	0.12858	0.13184	0.1348	0.13782	0.14072	0.1435	0.14639	0.14913	0.15196	0.15474	0.15726	0.15976	0.16203	0.16401	0.16574	0.16713	0.16822	0.16901
0.046986	0.046825	0.046724	0.046716	0.046702	0.046763	0.046821	0.047046	0.047361	0.047748	0.048332	0.049115	0.050104	0.051427	0.053036	0.054957	0.057234	0.059814	0.062647	0.065841	0.06913	0.072623	0.07638	0.080064	0.083955	0.087831	0.091561	0.095401	0.099028	0.10258	0.10601	0.10915	0.11223	0.11512	0.11773	0.1204	0.12298	0.12547	0.12803	0.13048	0.13298	0.13544	0.13769	0.1399	0.1419	0.14365	0.14517	0.14637	0.14732	0.14799
0.045524	0.045319	0.045234	0.045233	0.045229	0.045267	0.045378	0.045618	0.045945	0.046351	0.046955	0.047782	0.048803	0.050166	0.051846	0.053837	0.056207	0.058884	0.061823	0.065141	0.068557	0.072184	0.076088	0.079918	0.083952	0.087985	0.091856	0.095851	0.099627	0.10331	0.10687	0.11015	0.11337	0.1164	0.11912	0.12194	0.12465	0.12724	0.12992	0.13247	0.13508	0.13764	0.13996	0.14226	0.14434	0.14614	0.1477	0.14894	0.14991	0.1506
0.046162	0.045994	0.045917	0.045893	0.045891	0.045958	0.046047	0.046278	0.04661	0.047055	0.047676	0.048527	0.049571	0.050991	0.052714	0.054733	0.057155	0.059873	0.062848	0.066193	0.069638	0.073283	0.077184	0.081025	0.085044	0.08908	0.092922	0.096896	0.10065	0.10429	0.10784	0.1111	0.11427	0.11727	0.11995	0.12272	0.12538	0.12794	0.13056	0.13308	0.13563	0.13813	0.14039	0.14264	0.14464	0.14638	0.14788	0.14908	0.14999	0.15063
0.048773	0.048599	0.048503	0.048466	0.048444	0.048506	0.048586	0.048803	0.049127	0.049517	0.05013	0.050972	0.052002	0.053402	0.055111	0.057137	0.059547	0.06227	0.065256	0.06862	0.072098	0.075773	0.079713	0.083588	0.087681	0.091774	0.095682	0.099703	0.10351	0.1072	0.11079	0.11409	0.11731	0.12032	0.12306	0.12585	0.12855	0.13114	0.13382	0.13637	0.13898	0.14156	0.14388	0.14621	0.1483	0.15013	0.15172	0.15299	0.15401	0.15472
0.045741	0.04558	0.0455	0.045422	0.045416	0.045433	0.045519	0.045679	0.045929	0.046337	0.046893	0.047669	0.04863	0.04995	0.051571	0.053486	0.055768	0.05835	0.061172	0.064359	0.067608	0.071092	0.074797	0.078425	0.082279	0.086124	0.089793	0.093639	0.097239	0.10075	0.10415	0.10728	0.11033	0.1132	0.11579	0.11843	0.12095	0.12338	0.1259	0.12832	0.13079	0.13321	0.13541	0.1376	0.13955	0.14126	0.14275	0.14392	0.14483	0.14549
0.047766	0.047609	0.047516	0.047452	0.047439	0.04747	0.047535	0.047732	0.048012	0.048416	0.049006	0.049825	0.050829	0.05221	0.05391	0.055887	0.058293	0.060984	0.063951	0.067291	0.070716	0.074365	0.078251	0.082099	0.086158	0.090218	0.094092	0.09813	0.10194	0.10561	0.10924	0.11255	0.11578	0.11881	0.12155	0.12438	0.12705	0.12967	0.13235	0.13492	0.13756	0.14014	0.14248	0.1448	0.14688	0.14869	0.15028	0.15153	0.1525	0.1532
0.049731	0.049564	0.049465	0.049391	0.049373	0.049389	0.049478	0.049649	0.049918	0.050304	0.050862	0.051684	0.05265	0.054002	0.055652	0.05761	0.059969	0.062625	0.065578	0.068893	0.07233	0.075991	0.079901	0.083774	0.08785	0.091942	0.095834	0.099895	0.10371	0.10739	0.11099	0.11431	0.11753	0.12055	0.12328	0.12608	0.12874	0.13133	0.13398	0.13654	0.13919	0.14179	0.14416	0.14653	0.14866	0.15054	0.1522	0.15353	0.15457	0.15535
0.048684	0.048508	0.048419	0.048336	0.048331	0.048353	0.048412	0.048596	0.048863	0.049267	0.049821	0.050635	0.051601	0.052969	0.054634	0.056597	0.058963	0.061627	0.064595	0.067937	0.0714	0.075082	0.079022	0.082922	0.087043	0.091163	0.095094	0.099199	0.10305	0.10675	0.11038	0.11371	0.11693	0.11997	0.12271	0.12553	0.12821	0.13082	0.13351	0.13609	0.13876	0.14136	0.14376	0.14614	0.1483	0.15019	0.15187	0.15321	0.15428	0.15507
0.047567	0.047384	0.047308	0.047251	0.047243	0.047254	0.047348	0.047536	0.047836	0.048226	0.048783	0.049605	0.050581	0.051944	0.053615	0.055595	0.057986	0.060671	0.063654	0.067013	0.070486	0.074195	0.078149	0.082057	0.086192	0.09032	0.094258	0.098348	0.1022	0.10589	0.10952	0.11286	0.11608	0.11911	0.12185	0.12469	0.12737	0.12997	0.13267	0.13525	0.13791	0.1405	0.14287	0.14524	0.14735	0.14921	0.15084	0.15215	0.15317	0.15393
0.043573	0.043384	0.043324	0.043274	0.043294	0.043299	0.043429	0.043614	0.043892	0.044299	0.044843	0.045657	0.046619	0.047908	0.049539	0.051444	0.053727	0.056302	0.059143	0.062346	0.065615	0.069119	0.072851	0.076517	0.080366	0.08423	0.087917	0.091758	0.095371	0.098826	0.10224	0.10536	0.1084	0.11126	0.11385	0.11653	0.11905	0.12152	0.12404	0.12645	0.12895	0.13136	0.13358	0.13577	0.13773	0.13943	0.14092	0.1421	0.14302	0.14368
0.053401	0.053205	0.053114	0.053082	0.053096	0.053086	0.05323	0.053454	0.053761	0.054197	0.054801	0.055683	0.056748	0.058175	0.059953	0.062032	0.06455	0.067379	0.070499	0.074039	0.077686	0.081565	0.085716	0.089809	0.094109	0.098433	0.10256	0.10685	0.11088	0.11475	0.11855	0.12201	0.12539	0.12856	0.1314	0.13434	0.1371	0.13981	0.1426	0.14529	0.14807	0.15078	0.15328	0.15576	0.15797	0.15992	0.16164	0.16301	0.16409	0.1649
0.053283	0.053084	0.053001	0.052958	0.05298	0.052963	0.053088	0.053319	0.053633	0.054047	0.054639	0.055499	0.056534	0.057946	0.059687	0.061746	0.064227	0.06702	0.070121	0.073615	0.077228	0.081083	0.085207	0.089289	0.093574	0.097887	0.102	0.10628	0.1103	0.11416	0.11795	0.12142	0.12478	0.12795	0.13078	0.1337	0.13646	0.13916	0.14194	0.14462	0.14739	0.1501	0.15259	0.15507	0.15732	0.15928	0.16103	0.16243	0.16352	0.16436
0.053301	0.053102	0.053023	0.052995	0.053042	0.053024	0.053157	0.053434	0.053766	0.054202	0.054821	0.055733	0.056819	0.058274	0.060076	0.062185	0.064717	0.067549	0.070678	0.074209	0.077828	0.08167	0.085775	0.089815	0.094058	0.098304	0.10237	0.10659	0.11056	0.11436	0.11811	0.12158	0.12491	0.12808	0.13092	0.13385	0.13662	0.13928	0.14204	0.14467	0.14737	0.15	0.1524	0.15477	0.1569	0.15875	0.16037	0.16163	0.16262	0.16334
0.032015	0.031834	0.031774	0.031715	0.031736	0.031728	0.031814	0.032008	0.032238	0.032542	0.033005	0.033684	0.034495	0.035591	0.036967	0.038564	0.04049	0.042663	0.045071	0.047794	0.050582	0.053569	0.056773	0.059927	0.063259	0.066561	0.069729	0.073027	0.076076	0.079035	0.081931	0.084588	0.087166	0.089589	0.091805	0.094093	0.09626	0.098362	0.10053	0.10259	0.10471	0.10677	0.10866	0.11053	0.11222	0.1137	0.11501	0.11607	0.11688	0.11747
0.032143	0.032039	0.03192	0.031856	0.031851	0.031851	0.031935	0.032041	0.032261	0.032582	0.033011	0.033709	0.03452	0.035596	0.036983	0.038559	0.04051	0.042702	0.045084	0.047812	0.050622	0.053611	0.056813	0.059961	0.063325	0.066634	0.069805	0.073085	0.076153	0.079135	0.082034	0.084658	0.087261	0.089747	0.091966	0.094258	0.096434	0.098557	0.10075	0.10281	0.10494	0.10704	0.10894	0.11083	0.11253	0.11403	0.11536	0.1164	0.11723	0.11782
0.040973	0.040853	0.040782	0.040669	0.040662	0.040701	0.040769	0.040919	0.041157	0.041554	0.042081	0.042827	0.043745	0.044968	0.046523	0.048286	0.050462	0.052905	0.055571	0.058618	0.061758	0.0651	0.068661	0.072188	0.075966	0.079725	0.083329	0.087068	0.090588	0.093996	0.09727	0.10024	0.10314	0.10586	0.10827	0.11071	0.11305	0.11533	0.11772	0.11999	0.12235	0.12471	0.12687	0.12903	0.13095	0.13266	0.13419	0.1354	0.13638	0.13711
0.040031	0.039917	0.039833	0.039733	0.039711	0.039762	0.039836	0.039961	0.04018	0.040581	0.041106	0.04186	0.042784	0.044014	0.045576	0.047383	0.049611	0.052105	0.054838	0.057953	0.061185	0.064607	0.068227	0.071823	0.075661	0.079462	0.083098	0.086841	0.090364	0.093778	0.097069	0.10007	0.10302	0.10583	0.10834	0.11088	0.11334	0.11574	0.11821	0.12054	0.12296	0.12535	0.12753	0.1297	0.13165	0.13336	0.1349	0.1361	0.13705	0.13775
0.045156	0.045073	0.044995	0.044915	0.044904	0.044964	0.045067	0.045212	0.045489	0.045932	0.046499	0.047309	0.048296	0.049624	0.051294	0.053212	0.055557	0.058183	0.061056	0.064324	0.067722	0.071309	0.075122	0.078894	0.082922	0.086946	0.090763	0.09472	0.098452	0.1021	0.10562	0.10879	0.1119	0.11486	0.11746	0.12013	0.1227	0.1252	0.12781	0.13027	0.13284	0.13537	0.13769	0.13999	0.14206	0.14388	0.14551	0.14678	0.1478	0.14855
0.04903	0.048904	0.048818	0.048732	0.048696	0.048746	0.04881	0.048966	0.049252	0.049669	0.050242	0.051086	0.052097	0.053484	0.055197	0.057201	0.059652	0.062402	0.065437	0.06886	0.072423	0.076197	0.08021	0.084195	0.088443	0.092662	0.096694	0.10085	0.10477	0.10858	0.11226	0.11564	0.11893	0.12205	0.12483	0.12764	0.13036	0.133	0.13571	0.13829	0.14097	0.14362	0.14602	0.14842	0.15057	0.15249	0.15417	0.15552	0.15659	0.15737
0.03672	0.03666	0.036545	0.036445	0.036414	0.036448	0.036489	0.036579	0.03676	0.037111	0.037559	0.038204	0.039008	0.040086	0.041443	0.042999	0.044924	0.047091	0.04945	0.052147	0.054947	0.057917	0.061067	0.064191	0.067571	0.070915	0.074058	0.077329	0.080403	0.083391	0.086286	0.08887	0.091479	0.093941	0.096128	0.098355	0.10052	0.10263	0.1048	0.10686	0.10899	0.11109	0.113	0.1149	0.11663	0.11813	0.11948	0.12056	0.12141	0.12202
0.037727	0.03764	0.037545	0.037436	0.037395	0.037437	0.037482	0.037542	0.03774	0.038052	0.038489	0.039132	0.039907	0.040977	0.042318	0.043852	0.045752	0.047883	0.050228	0.052883	0.055638	0.058578	0.061676	0.064763	0.068099	0.071392	0.074527	0.077764	0.080816	0.083787	0.086638	0.089234	0.091785	0.094214	0.096373	0.098544	0.10068	0.10275	0.10488	0.10691	0.109	0.11109	0.11297	0.11485	0.11655	0.11803	0.11937	0.12041	0.12125	0.12186
0.040578	0.040459	0.040376	0.040264	0.040235	0.040237	0.040286	0.040396	0.040577	0.040909	0.041355	0.04199	0.042826	0.043887	0.045267	0.046871	0.048821	0.051043	0.053463	0.056218	0.059103	0.062129	0.065383	0.068605	0.072036	0.075498	0.07877	0.082171	0.085369	0.088469	0.091485	0.094235	0.09694	0.099525	0.1018	0.10415	0.10639	0.1086	0.11088	0.11302	0.11526	0.11747	0.11947	0.12147	0.12325	0.12483	0.12623	0.12734	0.12822	0.12886
0.038076	0.037923	0.037814	0.037767	0.037746	0.037748	0.037818	0.03795	0.03817	0.038484	0.038903	0.039568	0.040355	0.041412	0.04274	0.044291	0.046188	0.048325	0.050682	0.053347	0.056125	0.059067	0.062224	0.06535	0.068703	0.072047	0.07522	0.078524	0.081627	0.084638	0.087564	0.090233	0.092854	0.095306	0.097513	0.099763	0.10192	0.10402	0.10618	0.10825	0.11039	0.11251	0.11445	0.11635	0.11808	0.1196	0.12096	0.12203	0.12288	0.12351
0.034388	0.034286	0.034173	0.034083	0.034043	0.034056	0.034082	0.034191	0.034369	0.034639	0.035045	0.035619	0.03634	0.037321	0.038546	0.039973	0.041726	0.043695	0.045891	0.048363	0.050951	0.053681	0.056615	0.059543	0.062648	0.06575	0.068698	0.07176	0.074645	0.077456	0.080188	0.082658	0.085109	0.08745	0.089544	0.091688	0.093751	0.095761	0.09782	0.09977	0.1018	0.10379	0.10561	0.1074	0.10902	0.11044	0.11172	0.11272	0.11351	0.11409
0.038644	0.038482	0.038426	0.038398	0.038304	0.038297	0.038457	0.038623	0.038765	0.039025	0.039415	0.039982	0.040685	0.041629	0.042823	0.044216	0.045924	0.047906	0.050081	0.052518	0.055058	0.057839	0.060812	0.063733	0.066776	0.069866	0.072875	0.07588	0.078726	0.081494	0.084244	0.086752	0.089093	0.091379	0.093502	0.095636	0.097659	0.099616	0.10168	0.10366	0.10562	0.1076	0.1094	0.1112	0.11284	0.11424	0.11551	0.11654	0.11732	0.11788
0.036815	0.036642	0.036611	0.036563	0.036492	0.03648	0.036653	0.036843	0.03702	0.037268	0.037707	0.038308	0.039058	0.040066	0.041332	0.042817	0.044626	0.046716	0.049007	0.051597	0.05425	0.057168	0.060311	0.063345	0.066544	0.069773	0.072903	0.076077	0.079014	0.081882	0.084745	0.087308	0.089752	0.092086	0.094265	0.096474	0.098525	0.10052	0.10263	0.10463	0.10664	0.10864	0.11048	0.11234	0.11397	0.11542	0.1167	0.11774	0.11856	0.11912
0.03781	0.037625	0.03759	0.037554	0.037469	0.037452	0.037625	0.037827	0.03799	0.038234	0.038641	0.039232	0.039962	0.040952	0.042201	0.04365	0.045422	0.047471	0.049724	0.052258	0.054853	0.057712	0.060789	0.063771	0.0669	0.07005	0.073113	0.0762	0.079057	0.081875	0.084671	0.087185	0.089573	0.09185	0.094011	0.096178	0.098199	0.10017	0.10225	0.10424	0.1062	0.10816	0.10996	0.11175	0.11337	0.11477	0.11603	0.11705	0.11784	0.11839
0.046227	0.046023	0.045948	0.045865	0.045725	0.045672	0.045791	0.04592	0.046059	0.046298	0.046699	0.047296	0.04804	0.049069	0.050391	0.051935	0.053858	0.056069	0.058512	0.061287	0.064117	0.067262	0.07062	0.073872	0.077331	0.080801	0.084229	0.087658	0.090855	0.093992	0.097099	0.09992	0.10261	0.1052	0.10758	0.11002	0.11229	0.11449	0.11683	0.11905	0.12129	0.1235	0.12553	0.12759	0.12941	0.131	0.13241	0.13355	0.13444	0.13507
0.046194	0.04596	0.045893	0.045809	0.045683	0.045636	0.045769	0.045899	0.046039	0.046297	0.046714	0.047301	0.048047	0.049079	0.0504	0.051921	0.053826	0.056006	0.058418	0.061153	0.063933	0.067017	0.07032	0.073514	0.076901	0.080307	0.083678	0.087041	0.090195	0.093272	0.096337	0.099104	0.10173	0.10424	0.10656	0.10893	0.11113	0.11329	0.11557	0.11774	0.11993	0.12209	0.1241	0.12608	0.12787	0.1294	0.13079	0.1319	0.13277	0.13339
0.062052	0.061749	0.061598	0.061485	0.061281	0.061126	0.061176	0.061298	0.061361	0.061516	0.061819	0.062309	0.062951	0.06386	0.065031	0.066425	0.068169	0.070208	0.072486	0.075065	0.077717	0.080686	0.083898	0.087026	0.090336	0.093707	0.097003	0.10035	0.10348	0.10657	0.10964	0.11243	0.11506	0.11759	0.11992	0.12233	0.12454	0.1267	0.12899	0.13117	0.13339	0.13557	0.13759	0.13961	0.14143	0.143	0.14442	0.14555	0.14644	0.14707
0.062508	0.062234	0.06207	0.06193	0.061733	0.061597	0.06165	0.06175	0.061839	0.062043	0.062401	0.062981	0.063699	0.064732	0.066048	0.067623	0.069597	0.071869	0.074422	0.077308	0.080289	0.083604	0.087161	0.090612	0.094281	0.097998	0.10163	0.10529	0.10873	0.11209	0.11544	0.11852	0.12143	0.12424	0.12686	0.12952	0.13201	0.13442	0.13699	0.13941	0.14185	0.14427	0.14648	0.14871	0.15068	0.15241	0.15395	0.15518	0.15614	0.15679
0.047336	0.0471	0.047036	0.047024	0.046919	0.046885	0.047066	0.047265	0.047493	0.047803	0.04829	0.049008	0.049871	0.051051	0.052546	0.054278	0.056397	0.058835	0.061517	0.06454	0.067622	0.071001	0.074633	0.078114	0.081788	0.085494	0.0891	0.092782	0.096179	0.099513	0.10283	0.10582	0.10867	0.11139	0.11394	0.11651	0.1189	0.12124	0.12369	0.12603	0.12838	0.1307	0.13283	0.13497	0.13685	0.13848	0.13992	0.14109	0.142	0.14262
0.045945	0.045701	0.045661	0.045654	0.045552	0.045528	0.045708	0.045937	0.046145	0.046449	0.046938	0.047613	0.048462	0.049583	0.050974	0.052628	0.054629	0.056942	0.059487	0.062327	0.06523	0.068405	0.07182	0.075108	0.078564	0.08206	0.085487	0.088954	0.092154	0.095269	0.098405	0.10123	0.1039	0.10645	0.10883	0.11123	0.11348	0.11565	0.11797	0.12017	0.12238	0.12457	0.12656	0.12857	0.13035	0.13189	0.13326	0.13436	0.13522	0.13582
0.042605	0.042374	0.042339	0.042336	0.042248	0.042223	0.042405	0.042636	0.042848	0.04314	0.043624	0.044312	0.045148	0.046294	0.047705	0.049355	0.051398	0.05372	0.05627	0.059167	0.062097	0.065341	0.068792	0.072129	0.075653	0.079205	0.082691	0.086193	0.089429	0.092605	0.095759	0.098642	0.10134	0.10394	0.10635	0.10882	0.11111	0.11332	0.11569	0.11793	0.12018	0.1224	0.12444	0.12648	0.12829	0.12987	0.13126	0.13239	0.13326	0.13387
0.046298	0.046143	0.046014	0.045938	0.045928	0.045919	0.045973	0.046115	0.046358	0.046696	0.047155	0.047849	0.048712	0.049883	0.051332	0.053046	0.055151	0.0575	0.060107	0.063058	0.066114	0.0694	0.07288	0.076322	0.079974	0.083614	0.087075	0.090672	0.094092	0.097371	0.10057	0.10348	0.10638	0.10908	0.11157	0.11411	0.11653	0.1189	0.12131	0.12363	0.126	0.12833	0.13045	0.13255	0.13445	0.13611	0.13759	0.13874	0.13967	0.14032
0.044428	0.044288	0.04418	0.04409	0.044059	0.04406	0.044131	0.044241	0.044459	0.044815	0.045289	0.045992	0.046865	0.048041	0.049523	0.051251	0.053371	0.055738	0.058339	0.061284	0.064343	0.067628	0.071092	0.074519	0.078192	0.081837	0.085304	0.088925	0.092365	0.09567	0.098847	0.10176	0.10463	0.10732	0.10978	0.11225	0.11463	0.11694	0.11933	0.1216	0.12394	0.12626	0.12837	0.13046	0.13235	0.134	0.13547	0.13662	0.13756	0.13821
0.045851	0.045734	0.045626	0.045528	0.045486	0.045495	0.045579	0.04568	0.045901	0.046277	0.046773	0.047501	0.048397	0.049618	0.051145	0.052932	0.055134	0.057575	0.060285	0.06335	0.066518	0.069932	0.073517	0.077078	0.080885	0.08466	0.088257	0.091985	0.095535	0.098979	0.10229	0.10531	0.10829	0.11112	0.11368	0.11627	0.11879	0.12125	0.12375	0.12615	0.12861	0.13105	0.13325	0.13542	0.13739	0.13912	0.14065	0.14185	0.14281	0.14349
0.033803	0.033657	0.033545	0.033449	0.033395	0.033372	0.033416	0.033502	0.033638	0.033907	0.034264	0.034836	0.035548	0.03649	0.037697	0.039092	0.040836	0.042771	0.044918	0.047382	0.049893	0.052642	0.055526	0.058405	0.06148	0.064544	0.067482	0.070503	0.073391	0.076185	0.078892	0.081366	0.083799	0.086099	0.088188	0.090306	0.092359	0.094368	0.096437	0.098413	0.10046	0.10249	0.10434	0.10616	0.10782	0.10927	0.11057	0.11159	0.1124	0.11299
0.03327	0.033137	0.033024	0.032929	0.032886	0.032875	0.032935	0.03301	0.033169	0.033443	0.033823	0.034414	0.035137	0.03611	0.037332	0.038752	0.040522	0.042478	0.044644	0.047101	0.049624	0.052375	0.05526	0.058142	0.061213	0.06425	0.067172	0.070178	0.07305	0.07583	0.078512	0.080966	0.083369	0.085638	0.087702	0.089787	0.091789	0.093784	0.095821	0.097775	0.099795	0.10179	0.10362	0.10542	0.10706	0.10851	0.10978	0.1108	0.1116	0.11217
0.033569	0.033447	0.033336	0.033252	0.033207	0.033223	0.033293	0.033408	0.03359	0.033903	0.034356	0.035015	0.035821	0.036917	0.038264	0.039846	0.041793	0.043949	0.046329	0.049059	0.051877	0.054922	0.058119	0.061294	0.064738	0.068138	0.071379	0.074733	0.077915	0.080972	0.083939	0.086629	0.089285	0.091768	0.094024	0.09629	0.098491	0.10064	0.10284	0.10494	0.10711	0.10925	0.11121	0.11317	0.11494	0.11651	0.11791	0.11903	0.11993	0.12059
0.039351	0.039247	0.039149	0.039026	0.038987	0.039011	0.039096	0.039177	0.039374	0.039761	0.040253	0.040975	0.041857	0.043065	0.044579	0.046341	0.04851	0.050945	0.053612	0.05666	0.0598	0.06318	0.066756	0.070304	0.074115	0.077911	0.081532	0.085305	0.088861	0.092304	0.095637	0.098661	0.10164	0.10444	0.10696	0.10949	0.11192	0.11433	0.11679	0.11915	0.12159	0.12404	0.12626	0.12848	0.1305	0.13227	0.13386	0.1351	0.13612	0.13686
0.039918	0.039791	0.039708	0.039589	0.039564	0.039586	0.039679	0.039803	0.040014	0.040406	0.040919	0.041662	0.042584	0.04381	0.045363	0.047176	0.049393	0.051865	0.054598	0.057705	0.060916	0.064366	0.067987	0.071586	0.075436	0.079252	0.082898	0.086697	0.09027	0.093715	0.097033	0.10007	0.10303	0.10584	0.10836	0.11093	0.11337	0.11578	0.11827	0.12061	0.12307	0.12549	0.12771	0.1299	0.13189	0.13366	0.13524	0.13648	0.13748	0.13821
0.039304	0.039168	0.039073	0.03896	0.038919	0.038951	0.039045	0.03915	0.03935	0.039724	0.040231	0.040952	0.041859	0.043061	0.044588	0.046354	0.048539	0.050978	0.05365	0.056712	0.059856	0.063242	0.066811	0.070345	0.074137	0.077887	0.081473	0.085179	0.088674	0.092048	0.095325	0.098291	0.10122	0.10398	0.10649	0.10902	0.11144	0.11383	0.11626	0.11859	0.12099	0.12336	0.12554	0.12768	0.12963	0.13134	0.13288	0.13409	0.13505	0.13576
0.044356	0.04419	0.044096	0.044006	0.043988	0.043992	0.044058	0.044203	0.044448	0.044824	0.045331	0.046072	0.046999	0.048225	0.049768	0.051589	0.053796	0.056281	0.058992	0.062093	0.065313	0.068742	0.072383	0.075983	0.07981	0.083621	0.087241	0.091026	0.094595	0.098041	0.10138	0.10442	0.10742	0.11024	0.1128	0.1154	0.11787	0.12031	0.12279	0.12517	0.12763	0.13004	0.13225	0.13442	0.1364	0.13814	0.13969	0.1409	0.14187	0.14258
0.040966	0.040836	0.040726	0.040647	0.040595	0.040624	0.040687	0.040802	0.040997	0.041353	0.041831	0.042505	0.043379	0.044523	0.045973	0.047671	0.049716	0.052049	0.054599	0.057493	0.060467	0.063647	0.067006	0.070315	0.073877	0.07739	0.080756	0.084282	0.087559	0.090731	0.093827	0.096615	0.099381	0.10194	0.10428	0.10665	0.10892	0.11114	0.11344	0.11564	0.11791	0.12016	0.12221	0.12425	0.12607	0.12768	0.12909	0.13021	0.1311	0.13175
0.04273	0.042571	0.042471	0.042427	0.042424	0.042434	0.042512	0.042683	0.042939	0.043328	0.043841	0.044594	0.045531	0.046768	0.048334	0.050143	0.052331	0.054798	0.057507	0.060583	0.063739	0.067106	0.070679	0.074213	0.077981	0.081702	0.085253	0.088976	0.092493	0.095851	0.099117	0.1021	0.10502	0.10775	0.11025	0.11281	0.11522	0.11758	0.12003	0.12236	0.12476	0.12713	0.12929	0.13143	0.13333	0.13502	0.1365	0.13768	0.13861	0.13928
0.046549	0.046379	0.046254	0.046229	0.046228	0.046243	0.046287	0.046498	0.046776	0.047173	0.047698	0.048473	0.049448	0.05072	0.052334	0.054208	0.056469	0.059018	0.0618	0.064979	0.068237	0.071704	0.075409	0.079062	0.082953	0.086791	0.09046	0.094325	0.097907	0.10137	0.10475	0.10783	0.11088	0.11372	0.11629	0.11894	0.12147	0.12394	0.12648	0.12889	0.13138	0.13381	0.13604	0.13825	0.14022	0.14196	0.14348	0.14469	0.14564	0.14631
0.037811	0.037654	0.037545	0.037486	0.03746	0.037474	0.037569	0.037689	0.037888	0.038247	0.038722	0.03943	0.040302	0.041463	0.042933	0.044642	0.046716	0.049064	0.051641	0.054597	0.057624	0.060873	0.064336	0.067754	0.071415	0.075029	0.078516	0.082149	0.085512	0.088775	0.091943	0.094803	0.097647	0.10027	0.10265	0.10507	0.10739	0.10966	0.11201	0.11426	0.11658	0.1189	0.12103	0.12315	0.12505	0.12673	0.12824	0.12944	0.13041	0.13112
0.040911	0.040753	0.040642	0.040559	0.040523	0.040514	0.040579	0.040709	0.040908	0.041251	0.041726	0.042421	0.043299	0.044468	0.045934	0.047669	0.04978	0.052167	0.054793	0.057791	0.060858	0.064162	0.067662	0.071113	0.074815	0.078461	0.081944	0.085601	0.089006	0.09227	0.095451	0.09832	0.10117	0.10381	0.10622	0.10868	0.11102	0.11333	0.1157	0.11797	0.12031	0.12262	0.12474	0.12684	0.12874	0.13041	0.13189	0.13308	0.13402	0.13471
0.034063	0.033899	0.033793	0.033768	0.033741	0.033745	0.033821	0.033978	0.03419	0.034504	0.03495	0.035635	0.036455	0.03757	0.038966	0.040567	0.042534	0.044729	0.047143	0.049897	0.052696	0.055719	0.058904	0.062049	0.065435	0.068726	0.07189	0.0752	0.078291	0.081263	0.084161	0.086816	0.089415	0.091831	0.094042	0.096297	0.098457	0.10055	0.1027	0.10477	0.10689	0.10898	0.11088	0.11277	0.11445	0.11593	0.11722	0.11824	0.11903	0.11959
0.041836	0.04168	0.04157	0.041483	0.041433	0.041446	0.041502	0.041608	0.041807	0.042167	0.042645	0.043337	0.044223	0.045391	0.046878	0.04862	0.050732	0.053107	0.055725	0.058698	0.061745	0.064995	0.068447	0.071831	0.075485	0.079079	0.082499	0.086119	0.089481	0.092738	0.095939	0.098855	0.10177	0.10451	0.10703	0.10961	0.11206	0.11447	0.11692	0.11923	0.12162	0.12395	0.12608	0.12817	0.13003	0.13166	0.13309	0.13421	0.13506	0.13564
0.03967	0.039523	0.039424	0.039303	0.039247	0.039261	0.039295	0.039395	0.03957	0.039899	0.040346	0.040986	0.041791	0.042873	0.04424	0.04583	0.047752	0.0499	0.052264	0.054943	0.057698	0.06063	0.063746	0.066832	0.070129	0.073443	0.076591	0.079893	0.083011	0.086027	0.088972	0.091652	0.094315	0.096786	0.099044	0.10133	0.1035	0.10564	0.10786	0.10995	0.11211	0.11424	0.11617	0.11809	0.11977	0.12126	0.12256	0.12357	0.12438	0.12494
0.042248	0.042112	0.042004	0.041926	0.041886	0.041907	0.041996	0.042097	0.042321	0.042688	0.043167	0.043882	0.044762	0.045934	0.047431	0.049176	0.051287	0.053669	0.056301	0.059324	0.062413	0.065745	0.069281	0.07278	0.076544	0.080251	0.083785	0.087512	0.090956	0.094302	0.097528	0.10045	0.10336	0.10605	0.10853	0.11104	0.11343	0.11578	0.11817	0.12045	0.12282	0.12514	0.12729	0.12941	0.13134	0.13305	0.13457	0.13578	0.13676	0.13747
0.042089	0.04193	0.041829	0.041771	0.041742	0.041745	0.041818	0.041957	0.042179	0.042513	0.042963	0.043653	0.044497	0.045599	0.047	0.048644	0.05064	0.05289	0.05539	0.05822	0.061139	0.064271	0.067613	0.070926	0.074448	0.077932	0.081283	0.084789	0.088034	0.091153	0.094185	0.096925	0.099628	0.10212	0.1044	0.10671	0.10892	0.11106	0.11329	0.11543	0.11765	0.11984	0.12183	0.12383	0.12562	0.12721	0.12862	0.12973	0.13065	0.1313
0.044026	0.043884	0.043782	0.04371	0.043678	0.043661	0.043712	0.043829	0.044015	0.044318	0.044743	0.045356	0.046147	0.04717	0.048484	0.050061	0.051973	0.054132	0.056527	0.059267	0.062103	0.065154	0.06842	0.071656	0.075089	0.07853	0.081843	0.085306	0.088559	0.091694	0.094785	0.097609	0.1004	0.10306	0.10545	0.10793	0.1103	0.1126	0.11498	0.11725	0.1196	0.12191	0.12401	0.12611	0.12798	0.12963	0.13108	0.13223	0.13313	0.13378
0.043795	0.043643	0.043542	0.043465	0.043437	0.043417	0.043456	0.043556	0.043723	0.044024	0.044423	0.045027	0.04579	0.046792	0.048088	0.049609	0.051467	0.053592	0.055928	0.058618	0.061389	0.064374	0.067576	0.070759	0.074141	0.07754	0.080818	0.084245	0.087466	0.090604	0.093668	0.096477	0.099254	0.10188	0.10426	0.10671	0.10905	0.11134	0.11371	0.11597	0.11831	0.12061	0.12271	0.12481	0.12667	0.12834	0.12981	0.13095	0.13187	0.13251
0.048572	0.048409	0.048322	0.048275	0.048264	0.048246	0.048263	0.048423	0.048619	0.048906	0.049291	0.049899	0.050646	0.051626	0.052875	0.054349	0.05616	0.058199	0.060473	0.063074	0.065747	0.06866	0.071762	0.074855	0.078142	0.081403	0.084565	0.087843	0.090923	0.093901	0.09679	0.099454	0.10207	0.10455	0.1068	0.10911	0.11131	0.11347	0.11568	0.1178	0.11997	0.12211	0.12406	0.126	0.12775	0.12928	0.13064	0.13173	0.13258	0.1332
0.045197	0.045051	0.044976	0.044901	0.044883	0.044858	0.044894	0.044999	0.045156	0.045425	0.045789	0.046327	0.047037	0.047944	0.049123	0.0505	0.052186	0.0541	0.056211	0.058665	0.061162	0.06389	0.066809	0.069698	0.07282	0.075912	0.078925	0.082056	0.084973	0.087819	0.09057	0.093081	0.09554	0.097841	0.099918	0.10203	0.10406	0.10605	0.10812	0.11009	0.11216	0.1142	0.11606	0.11793	0.11959	0.12108	0.12239	0.12344	0.12427	0.1249
0.069101	0.068934	0.068823	0.068726	0.06872	0.068727	0.068834	0.069055	0.069354	0.069856	0.070491	0.07146	0.07266	0.074221	0.076218	0.07854	0.081377	0.084565	0.088034	0.092044	0.096105	0.10049	0.10516	0.10975	0.11469	0.11959	0.12431	0.12922	0.13385	0.13837	0.14277	0.1468	0.1508	0.15452	0.15791	0.16134	0.16459	0.16778	0.17102	0.17415	0.17735	0.18051	0.18339	0.18623	0.1888	0.19101	0.19297	0.1945	0.19571	0.19659
0.049494	0.049362	0.049267	0.049176	0.04915	0.049147	0.049206	0.049354	0.049572	0.049935	0.050432	0.051153	0.052042	0.053225	0.054706	0.056424	0.058543	0.060908	0.063525	0.06649	0.069541	0.072823	0.076307	0.079794	0.083509	0.087208	0.090789	0.094479	0.097976	0.10138	0.10465	0.10763	0.11053	0.11327	0.11569	0.11816	0.12053	0.12283	0.12522	0.1275	0.12985	0.13219	0.13432	0.13644	0.13835	0.14003	0.14153	0.14271	0.14367	0.14439
0.071578	0.07142	0.071306	0.071222	0.071218	0.07122	0.071329	0.07156	0.071839	0.072276	0.072851	0.073739	0.074826	0.076261	0.078093	0.080219	0.082832	0.085788	0.089038	0.092777	0.096613	0.10075	0.10518	0.10955	0.11425	0.11891	0.12341	0.12809	0.13249	0.13678	0.14093	0.14472	0.14846	0.15195	0.15513	0.15836	0.16145	0.16448	0.16758	0.17055	0.17361	0.17664	0.17939	0.18213	0.18457	0.18673	0.18864	0.19015	0.19136	0.19224
0.049717	0.049573	0.049471	0.049391	0.049386	0.049382	0.049458	0.049639	0.049883	0.050283	0.050816	0.051584	0.05254	0.053788	0.055385	0.057239	0.059504	0.062039	0.064827	0.068016	0.071288	0.074782	0.078531	0.082216	0.08614	0.090029	0.093744	0.097611	0.10121	0.10471	0.10812	0.11122	0.11427	0.11712	0.11972	0.12235	0.12487	0.12734	0.12987	0.13228	0.13477	0.1372	0.13943	0.14163	0.14362	0.14536	0.14691	0.14815	0.14911	0.14983
0.059438	0.059321	0.059222	0.059123	0.059093	0.059085	0.059157	0.059281	0.059488	0.059826	0.060294	0.060964	0.061806	0.062917	0.064316	0.065964	0.067997	0.070261	0.072767	0.075648	0.07859	0.081796	0.085189	0.088564	0.092199	0.095798	0.099288	0.1029	0.10631	0.10965	0.11285	0.11581	0.11873	0.1215	0.12397	0.12648	0.12889	0.13123	0.13365	0.13596	0.13833	0.14069	0.14283	0.14497	0.14687	0.14856	0.15005	0.15122	0.15215	0.15284
0.050085	0.049928	0.049829	0.049758	0.049746	0.049741	0.049814	0.050011	0.050265	0.050677	0.051213	0.051998	0.052978	0.054231	0.055832	0.057694	0.059951	0.062503	0.06527	0.068437	0.071664	0.075129	0.078828	0.082483	0.086389	0.090244	0.093965	0.097818	0.10141	0.10492	0.10832	0.11141	0.11443	0.11725	0.11978	0.12235	0.12478	0.12716	0.12961	0.13194	0.13438	0.13677	0.13897	0.14115	0.14311	0.14484	0.14638	0.1476	0.14856	0.14929
[truncated: 650 more columns]
