# Supplementary material for: A Comparison of Sparse Partial Least Squares and Elastic Net in Wavelength Selection on NIR Spectroscopy Data
Source: Int J Anal Chem. 2019 Aug 1;2019:7314916. doi: 10.1155/2019/7314916 (PMC6699329; doi:10.1155/2019/7314916)
Supplement: Supplementary Materials — Three real data sets used in Section 4. All the data sets are saved as “.txt” format and can be used freely. [file 7314916.f1.zip › 7314916.f1/mp5spec.txt]

-0.01244	-0.012514	-0.01255	-0.012519	-0.012468	-0.012356	-0.01219	-0.011983	-0.011684	-0.011296	-0.010783	-0.010145	-0.0092547	-0.0081435	-0.0067644	-0.0051099	-0.0031054	-0.0008332	0.0017189	0.0044811	0.0075286	0.010737	0.014059	0.017548	0.021147	0.024766	0.028403	0.031993	0.035558	0.038995	0.042254	0.045407	0.048351	0.051043	0.053623	0.056079	0.058486	0.06084	0.063163	0.06553	0.06792	0.070239	0.072547	0.07476	0.076837	0.078702	0.080345	0.081766	0.082932	0.083812
-0.014189	-0.014251	-0.014288	-0.014264	-0.014214	-0.014106	-0.013945	-0.013756	-0.013454	-0.013078	-0.012555	-0.011914	-0.011026	-0.0099253	-0.0085475	-0.006909	-0.0049121	-0.0026449	-9.73e-005	0.0026597	0.0057168	0.0089248	0.012262	0.015767	0.019371	0.022999	0.02665	0.030255	0.033838	0.037283	0.040555	0.043719	0.046667	0.049376	0.051961	0.054424	0.056842	0.059216	0.061558	0.063944	0.066351	0.068674	0.070987	0.073225	0.07531	0.077194	0.078852	0.080284	0.081458	0.082333
-0.013373	-0.013439	-0.013476	-0.013456	-0.013413	-0.013314	-0.013167	-0.013003	-0.012724	-0.012368	-0.011893	-0.0113	-0.010459	-0.0094102	-0.0081027	-0.00653	-0.0046269	-0.0024663	-3.65e-005	0.0025884	0.0054867	0.0085321	0.011683	0.014996	0.018409	0.021837	0.025287	0.028705	0.032111	0.035395	0.038526	0.041568	0.044432	0.047072	0.049607	0.052036	0.054416	0.05675	0.059046	0.06137	0.063695	0.065938	0.068157	0.070292	0.072278	0.074056	0.075616	0.076957	0.078041	0.078833
-0.016487	-0.016543	-0.016576	-0.016573	-0.016519	-0.016414	-0.016278	-0.016096	-0.01583	-0.015473	-0.014988	-0.014383	-0.013561	-0.012538	-0.011254	-0.0097227	-0.0078621	-0.0057489	-0.0033787	-0.0008145	0.0020157	0.0049807	0.0080546	0.011293	0.01463	0.017989	0.021371	0.024722	0.028053	0.031281	0.034352	0.037338	0.04014	0.042715	0.045174	0.047523	0.049821	0.052082	0.054304	0.056567	0.058843	0.061041	0.063225	0.065323	0.067278	0.069028	0.070568	0.071889	0.072965	0.073756
-0.0084945	-0.008567	-0.0085971	-0.0085664	-0.0085151	-0.0083876	-0.0082185	-0.0079969	-0.0076663	-0.0072372	-0.0066521	-0.0059328	-0.0049312	-0.0036872	-0.0021366	-0.0002756	0.0019756	0.0045378	0.0074159	0.010523	0.01395	0.017546	0.02127	0.025193	0.029217	0.033266	0.037341	0.041369	0.045365	0.049217	0.052892	0.056445	0.059767	0.062808	0.065716	0.068481	0.071189	0.07384	0.076462	0.079133	0.081822	0.084423	0.087001	0.089483	0.091794	0.09387	0.095694	0.097254	0.09853	0.099472
-0.0080392	-0.0081153	-0.0081474	-0.0081204	-0.0080771	-0.0079451	-0.0077832	-0.0075464	-0.0072199	-0.0067862	-0.0061978	-0.0054701	-0.0044595	-0.003202	-0.001638	0.0002465	0.0025136	0.0050872	0.0079828	0.011115	0.014571	0.018203	0.021957	0.025912	0.029985	0.034075	0.03818	0.042245	0.046289	0.050196	0.053902	0.057488	0.060845	0.063917	0.06685	0.069637	0.072372	0.075049	0.077684	0.080373	0.083074	0.085692	0.08829	0.090785	0.093114	0.095197	0.097036	0.098614	0.099899	0.10085
-0.0060157	-0.006107	-0.0061484	-0.0061363	-0.0060768	-0.0059696	-0.0058095	-0.0055948	-0.0052781	-0.0048554	-0.0042876	-0.0035778	-0.0025917	-0.0013597	0.0001752	0.0020089	0.0042341	0.006767	0.0096072	0.012669	0.01605	0.019584	0.023239	0.027082	0.031028	0.03499	0.038979	0.042924	0.046846	0.050639	0.054252	0.057759	0.061042	0.064051	0.066938	0.069673	0.072359	0.074991	0.07758	0.080223	0.082879	0.085438	0.087977	0.090411	0.092671	0.094687	0.096459	0.097973	0.099205	0.10011
-0.0061071	-0.0061888	-0.0062351	-0.006211	-0.00617	-0.0060476	-0.005887	-0.0056594	-0.0053422	-0.0049237	-0.0043456	-0.0036212	-0.0026235	-0.0013777	0.0001674	0.0020251	0.0042747	0.0068356	0.0097023	0.012796	0.016204	0.019786	0.023492	0.027389	0.031405	0.035439	0.039502	0.04353	0.047536	0.051423	0.055127	0.058701	0.062055	0.065129	0.068058	0.07084	0.07356	0.076222	0.07886	0.081548	0.084266	0.086901	0.089518	0.092018	0.094344	0.096433	0.098259	0.099819	0.10109	0.10203
-0.011135	-0.011205	-0.011241	-0.011226	-0.01118	-0.011058	-0.010903	-0.010703	-0.010406	-0.010007	-0.0094891	-0.0088443	-0.0079321	-0.0068061	-0.0054081	-0.0037266	-0.0016953	0.0006133	0.0031986	0.0059876	0.0090647	0.012302	0.015652	0.019171	0.022796	0.026449	0.030131	0.03378	0.037415	0.040935	0.044288	0.047532	0.050576	0.053365	0.056032	0.058561	0.061054	0.063486	0.065895	0.06835	0.070827	0.073227	0.075611	0.077898	0.080023	0.081927	0.0836	0.085031	0.086198	0.087062
-0.013503	-0.01357	-0.013605	-0.013588	-0.013545	-0.013428	-0.013277	-0.013081	-0.01278	-0.012393	-0.011872	-0.011231	-0.010341	-0.0092317	-0.0078584	-0.0062051	-0.0041982	-0.0019229	0.0006262	0.003387	0.0064255	0.0096117	0.012915	0.016382	0.019951	0.023546	0.027167	0.030748	0.034307	0.037761	0.041047	0.044235	0.04721	0.049938	0.052549	0.055041	0.057477	0.05987	0.062229	0.06464	0.067071	0.069425	0.071766	0.074002	0.076087	0.077953	0.079594	0.081	0.082146	0.082997
-0.0002518	-0.0003372	-0.0003769	-0.0003702	-0.000303	-0.0001814	2.39e-005	0.0002832	0.0006484	0.0011407	0.0017999	0.0026268	0.0037708	0.0051768	0.0069484	0.0090625	0.01162	0.014517	0.017769	0.021276	0.025144	0.029208	0.033416	0.037849	0.042412	0.046997	0.051609	0.056176	0.060707	0.065088	0.069246	0.07325	0.076977	0.080384	0.083626	0.0867	0.089702	0.092641	0.095541	0.098517	0.10152	0.10443	0.10732	0.1101	0.1127	0.11504	0.1171	0.11888	0.12033	0.12143
-0.0031553	-0.0032551	-0.0032971	-0.0032958	-0.0032561	-0.0031353	-0.0029661	-0.0027332	-0.002395	-0.001951	-0.0013393	-0.0005669	0.000501	0.0018236	0.0034896	0.0054901	0.0079221	0.01069	0.013804	0.017175	0.020914	0.024837	0.028909	0.033199	0.037598	0.04203	0.046488	0.050898	0.055275	0.059504	0.063517	0.067398	0.07103	0.074348	0.077526	0.08054	0.083487	0.086378	0.089238	0.09216	0.095103	0.097959	0.10081	0.10354	0.1061	0.1084	0.11044	0.11219	0.11363	0.11471
-0.013395	-0.013476	-0.013529	-0.01351	-0.013475	-0.013374	-0.013221	-0.013039	-0.012748	-0.012364	-0.011845	-0.011206	-0.010312	-0.0092002	-0.007814	-0.0061521	-0.0041356	-0.0018469	0.0007319	0.0035226	0.0066113	0.0098575	0.013237	0.016797	0.020459	0.024141	0.027845	0.031511	0.035138	0.038634	0.041959	0.045162	0.048138	0.050858	0.053445	0.055909	0.058318	0.060693	0.063039	0.065436	0.067864	0.070218	0.072573	0.074844	0.07698	0.078915	0.080629	0.082124	0.08336	0.084298
-0.013035	-0.013121	-0.013162	-0.013152	-0.013105	-0.012995	-0.012829	-0.01263	-0.012313	-0.011905	-0.011354	-0.010671	-0.0097224	-0.0085486	-0.0070788	-0.0053174	-0.0031791	-0.0007448	0.0019883	0.0049468	0.0082191	0.011659	0.015228	0.019001	0.02289	0.026791	0.030708	0.034585	0.038422	0.042129	0.045639	0.049017	0.052157	0.055023	0.057755	0.060345	0.062874	0.065364	0.067814	0.070331	0.072869	0.075333	0.077803	0.08018	0.082411	0.08443	0.086227	0.087787	0.089076	0.090052
-0.0008672	-0.0009451	-0.0009693	-0.0009419	-0.0008788	-0.000743	-0.0005521	-0.0002927	7.11e-005	0.0005472	0.001195	0.0020079	0.0031141	0.0044842	0.0061936	0.0082453	0.010722	0.01353	0.016679	0.020078	0.023822	0.027747	0.031804	0.036073	0.040456	0.044865	0.049294	0.053673	0.058018	0.062209	0.066198	0.070047	0.073629	0.076907	0.080033	0.082999	0.085909	0.088743	0.091533	0.094381	0.097249	0.10002	0.10276	0.10541	0.10786	0.11006	0.112	0.11366	0.11502	0.11603
-0.0013006	-0.001381	-0.0014029	-0.0013871	-0.0013099	-0.0011869	-0.0009899	-0.0007326	-0.0003805	9.98e-005	0.0007428	0.0015608	0.0026786	0.0040668	0.0057939	0.007872	0.010396	0.013254	0.016463	0.019936	0.023757	0.027772	0.031921	0.036287	0.040776	0.045281	0.049811	0.054294	0.058742	0.063033	0.067115	0.071059	0.074751	0.078138	0.081368	0.084442	0.08745	0.090399	0.093296	0.096258	0.099225	0.10209	0.10493	0.10766	0.1102	0.11248	0.11449	0.11621	0.11761	0.11864
-0.0072872	-0.0073691	-0.0074107	-0.0073834	-0.0073324	-0.007209	-0.0070318	-0.0068046	-0.0064741	-0.006037	-0.005459	-0.004728	-0.0037219	-0.0024719	-0.0009153	0.0009419	0.0031821	0.00572	0.0085624	0.011621	0.014981	0.018499	0.022135	0.025956	0.029877	0.033824	0.037795	0.041725	0.045632	0.049417	0.053019	0.056512	0.059779	0.062784	0.065656	0.06839	0.071062	0.073679	0.076262	0.07889	0.081531	0.084079	0.086611	0.089031	0.091288	0.0933	0.095067	0.09657	0.097798	0.098705
-0.0069932	-0.007076	-0.0071157	-0.0070969	-0.0070493	-0.0069179	-0.0067548	-0.006536	-0.0061985	-0.0057649	-0.0051791	-0.0044466	-0.0034186	-0.002139	-0.000555	0.0013576	0.0036592	0.0062756	0.0092096	0.012376	0.01587	0.019524	0.023297	0.027267	0.031345	0.035441	0.039559	0.043635	0.047688	0.051611	0.055345	0.058954	0.06234	0.065461	0.068454	0.071296	0.074081	0.076815	0.079504	0.082239	0.084984	0.087633	0.090265	0.092773	0.095105	0.0972	0.099033	0.1006	0.10187	0.1028
-0.00864	-0.0087151	-0.008755	-0.0087261	-0.0086778	-0.0085472	-0.0083787	-0.0081376	-0.007804	-0.0073514	-0.0067539	-0.0059922	-0.0049551	-0.0036557	-0.0020493	-0.0001138	0.0022188	0.0048571	0.0078156	0.011013	0.014532	0.018204	0.021998	0.025989	0.030077	0.034181	0.038303	0.042383	0.046435	0.050358	0.054085	0.05771	0.061102	0.064212	0.067184	0.070024	0.072794	0.075508	0.078177	0.080884	0.0836	0.086217	0.08881	0.091288	0.093587	0.09564	0.097441	0.098968	0.1002	0.1011
-0.0066768	-0.0067647	-0.0068133	-0.0067866	-0.0067437	-0.0066199	-0.0064388	-0.0062046	-0.0058641	-0.0054142	-0.0048063	-0.004045	-0.0029925	-0.0016803	-4.67e-005	0.0019107	0.0042683	0.0069487	0.009947	0.013178	0.016728	0.020451	0.024295	0.028333	0.032483	0.036636	0.040814	0.044938	0.049036	0.053	0.056772	0.060422	0.06384	0.066981	0.069984	0.07285	0.075658	0.078407	0.081112	0.083871	0.086636	0.089303	0.091954	0.094485	0.096846	0.098957	0.10081	0.10239	0.10368	0.10462
-0.009014	-0.0090901	-0.0091234	-0.0090975	-0.0090456	-0.0089145	-0.0087374	-0.0085121	-0.0081639	-0.0077257	-0.0071286	-0.0063835	-0.0053591	-0.0040875	-0.002497	-0.0006071	0.0016739	0.0042567	0.0071547	0.010276	0.013714	0.017304	0.021011	0.024909	0.028908	0.032921	0.036963	0.040964	0.044952	0.048807	0.05248	0.056036	0.059372	0.062428	0.065354	0.068132	0.070845	0.073511	0.076132	0.078808	0.081492	0.084082	0.086647	0.089094	0.091363	0.09339	0.095168	0.096681	0.097894	0.098783
-0.0080294	-0.0080948	-0.0081286	-0.0081014	-0.0080432	-0.0079076	-0.0077428	-0.0075088	-0.0071625	-0.0067175	-0.0061166	-0.0053675	-0.0043338	-0.0030435	-0.0014395	0.0004838	0.0027995	0.0054255	0.0083785	0.011557	0.01505	0.01871	0.022492	0.026462	0.030536	0.034633	0.038754	0.042832	0.046899	0.050829	0.054585	0.058223	0.061627	0.06476	0.067757	0.070605	0.073402	0.076143	0.07884	0.081584	0.084339	0.086991	0.089623	0.092136	0.094469	0.096554	0.098378	0.09993	0.10118	0.1021
-0.0067074	-0.006803	-0.0068464	-0.0068366	-0.0067844	-0.0066671	-0.0064948	-0.0062657	-0.0059407	-0.0055119	-0.0049268	-0.0041939	-0.0031901	-0.001923	-0.0003507	0.0015286	0.003819	0.0064295	0.0093615	0.012534	0.016043	0.019727	0.02354	0.027564	0.031704	0.035867	0.040051	0.044199	0.048329	0.052317	0.056103	0.059771	0.063208	0.066359	0.069371	0.072233	0.075036	0.077793	0.080517	0.083299	0.086101	0.088816	0.091516	0.094113	0.096536	0.098722	0.10065	0.10231	0.10366	0.10468
-0.0068481	-0.00694	-0.0069885	-0.0069793	-0.0069274	-0.0068143	-0.0066499	-0.0064264	-0.006096	-0.0056718	-0.0051114	-0.0044032	-0.0034139	-0.0021743	-0.0006393	0.0011997	0.0034257	0.0059574	0.008803	0.011876	0.015267	0.018832	0.022525	0.026417	0.030425	0.034452	0.038504	0.042502	0.046479	0.050323	0.053979	0.057517	0.06082	0.063839	0.06672	0.069445	0.07212	0.074748	0.077346	0.080009	0.082695	0.085298	0.087893	0.090389	0.092719	0.09481	0.096653	0.098237	0.099543	0.10052
-0.0018191	-0.0019053	-0.0019562	-0.0019451	-0.0018952	-0.0017878	-0.0016169	-0.0014018	-0.0010785	-0.0006509	-7.4e-005	0.0006591	0.0016644	0.0029148	0.0044544	0.0063309	0.0086012	0.011174	0.014067	0.017188	0.020636	0.024253	0.027985	0.031913	0.035954	0.040018	0.044104	0.04815	0.052171	0.056057	0.059748	0.063325	0.066674	0.069749	0.072703	0.075517	0.078268	0.080964	0.083619	0.086328	0.089051	0.091687	0.094308	0.096825	0.099173	0.10129	0.10314	0.10473	0.10602	0.10697
-0.011742	-0.011836	-0.011879	-0.011852	-0.011793	-0.011656	-0.011471	-0.011242	-0.010896	-0.010458	-0.0098639	-0.0091325	-0.0081206	-0.0068644	-0.0053032	-0.0034333	-0.0011838	0.0013655	0.004217	0.0072885	0.010667	0.014198	0.017841	0.02167	0.025597	0.029526	0.033474	0.03738	0.041266	0.045029	0.048613	0.052091	0.05535	0.058353	0.061219	0.063946	0.066616	0.069228	0.071804	0.074417	0.077041	0.079568	0.082072	0.084466	0.086689	0.088674	0.090416	0.091904	0.093108	0.093988
0.0008565	0.0007349	0.0006675	0.0006589	0.0007042	0.0008203	0.0010269	0.0012797	0.0016339	0.0021059	0.0027466	0.0035402	0.0046322	0.005996	0.0077003	0.0097431	0.012219	0.015038	0.018201	0.02162	0.025384	0.029334	0.033418	0.037723	0.04215	0.0466	0.051079	0.055499	0.059898	0.064154	0.068204	0.072118	0.075775	0.079108	0.082278	0.085286	0.088232	0.091121	0.093976	0.096908	0.099863	0.10273	0.1056	0.10835	0.11091	0.1132	0.11521	0.11694	0.11836	0.11942
-0.0034861	-0.0036073	-0.0036666	-0.0036568	-0.0036063	-0.0034763	-0.0032828	-0.0030317	-0.0026673	-0.0022032	-0.0015693	-0.000788	0.0003024	0.0016529	0.003328	0.0053426	0.00778	0.010546	0.01365	0.017007	0.020705	0.024585	0.028598	0.032835	0.037183	0.041543	0.04593	0.050273	0.054592	0.058757	0.062729	0.066564	0.070145	0.073405	0.076512	0.079444	0.082315	0.085137	0.087927	0.09078	0.09367	0.096479	0.099278	0.10196	0.10447	0.10672	0.1087	0.1104	0.11178	0.11282
-0.0037983	-0.0039129	-0.0039503	-0.0039367	-0.0038894	-0.0037507	-0.0035664	-0.0033002	-0.0029299	-0.0024479	-0.0017936	-0.0009951	0.0001082	0.0014725	0.0031596	0.0051834	0.0076288	0.010396	0.013484	0.016806	0.020465	0.024289	0.028231	0.032377	0.036641	0.040918	0.045223	0.049487	0.053713	0.057808	0.061701	0.065478	0.069007	0.072237	0.07532	0.078238	0.081087	0.083879	0.086625	0.089427	0.092244	0.09497	0.097667	0.10026	0.10267	0.10481	0.10669	0.10829	0.10959	0.11054
-0.020602	-0.020691	-0.020722	-0.020713	-0.02066	-0.020536	-0.020369	-0.020153	-0.019852	-0.019465	-0.018942	-0.018295	-0.017408	-0.016311	-0.01495	-0.013321	-0.011362	-0.0091458	-0.0066579	-0.0039861	-0.0010363	0.0020565	0.0052419	0.0086024	0.01205	0.015512	0.018984	0.022408	0.025803	0.029079	0.0322	0.035219	0.038057	0.040667	0.043172	0.045562	0.047908	0.050208	0.052461	0.054745	0.057036	0.059241	0.061426	0.063524	0.065487	0.067255	0.068815	0.070163	0.071263	0.07207
-0.022055	-0.022122	-0.022155	-0.022139	-0.022085	-0.021975	-0.021819	-0.021608	-0.021303	-0.020935	-0.020427	-0.019792	-0.018915	-0.017835	-0.016502	-0.014908	-0.012978	-0.010786	-0.0083294	-0.0056728	-0.0027403	0.0003353	0.003522	0.0068728	0.01032	0.013772	0.017242	0.020673	0.024073	0.027347	0.030466	0.033487	0.036305	0.03891	0.041407	0.043801	0.046139	0.048432	0.050691	0.052984	0.055284	0.0575	0.059703	0.061821	0.063797	0.065575	0.067148	0.068505	0.069604	0.070421
-0.017719	-0.017815	-0.017858	-0.017849	-0.017785	-0.017657	-0.017473	-0.017243	-0.01693	-0.016517	-0.015963	-0.015288	-0.014365	-0.013223	-0.011801	-0.010116	-0.0080765	-0.005772	-0.0031872	-0.000403	0.0026729	0.0059033	0.0092492	0.012778	0.016414	0.020074	0.023764	0.027423	0.031056	0.034572	0.037901	0.041102	0.044067	0.046751	0.049287	0.051674	0.054003	0.056293	0.058575	0.06092	0.063305	0.06564	0.067971	0.070228	0.07234	0.074249	0.075931	0.077384	0.07858	0.079489
-0.013716	-0.013812	-0.013878	-0.01385	-0.013796	-0.013674	-0.013503	-0.013274	-0.012937	-0.012498	-0.011915	-0.0112	-0.010198	-0.0089574	-0.0074218	-0.0055714	-0.0033371	-0.0008006	0.0020621	0.0051583	0.008574	0.012155	0.015859	0.019758	0.023767	0.02779	0.031822	0.035796	0.03973	0.043524	0.047118	0.050579	0.053817	0.056785	0.059638	0.062346	0.065	0.067614	0.070183	0.072798	0.075411	0.077943	0.080453	0.082868	0.085124	0.087154	0.088939	0.090479	0.091727	0.092654
-0.012817	-0.012892	-0.012931	-0.012902	-0.01283	-0.012688	-0.012507	-0.012264	-0.011908	-0.011449	-0.010838	-0.010085	-0.0090471	-0.007763	-0.0061773	-0.0042636	-0.0019636	0.0006524	0.0035874	0.006759	0.010264	0.013939	0.017749	0.021752	0.025871	0.030003	0.034159	0.038263	0.042332	0.046265	0.049996	0.053589	0.056936	0.060007	0.062932	0.065707	0.068429	0.0711	0.073735	0.076423	0.079129	0.081754	0.084357	0.08685	0.089181	0.091281	0.093126	0.094704	0.095986	0.096935
-0.0096408	-0.0097394	-0.0097921	-0.0097745	-0.009725	-0.009585	-0.0094028	-0.0091561	-0.0088072	-0.0083579	-0.0077418	-0.0069772	-0.0059191	-0.0046117	-0.0029792	-0.0010198	0.0013436	0.0040225	0.0070326	0.01029	0.013877	0.017651	0.021556	0.02566	0.029872	0.034105	0.038352	0.042543	0.046696	0.050698	0.054503	0.058176	0.061608	0.064745	0.067747	0.070599	0.073387	0.076117	0.078811	0.08156	0.084318	0.086984	0.089632	0.092172	0.094541	0.096663	0.098538	0.10014	0.10145	0.10241
-0.018936	-0.019015	-0.019054	-0.01905	-0.019006	-0.018884	-0.018737	-0.018526	-0.018241	-0.017875	-0.017379	-0.016766	-0.015922	-0.01488	-0.013573	-0.012013	-0.010116	-0.0079622	-0.005543	-0.0029259	-2.7e-005	0.0030241	0.0061836	0.0095098	0.012936	0.016373	0.019827	0.023233	0.026611	0.029863	0.032955	0.035952	0.038754	0.041329	0.043798	0.046152	0.048467	0.050738	0.052973	0.055255	0.057547	0.059764	0.061967	0.064086	0.066073	0.067861	0.069447	0.07082	0.071937	0.072768
-0.018735	-0.018824	-0.018856	-0.018837	-0.018772	-0.01866	-0.018481	-0.01829	-0.017997	-0.017629	-0.017132	-0.016516	-0.015677	-0.014637	-0.01335	-0.011801	-0.0099302	-0.0078131	-0.0054455	-0.0028804	-4.19e-005	0.002941	0.0060375	0.0092952	0.012647	0.016017	0.019404	0.022758	0.026084	0.029287	0.032338	0.035281	0.03803	0.040561	0.042983	0.045288	0.047537	0.049748	0.051923	0.054136	0.056381	0.058549	0.060698	0.06278	0.064728	0.066485	0.068042	0.069389	0.070491	0.071317
-0.016405	-0.016508	-0.016561	-0.016549	-0.016499	-0.016398	-0.016234	-0.016034	-0.015761	-0.01539	-0.014887	-0.014279	-0.013444	-0.012389	-0.011083	-0.0095104	-0.0076131	-0.0054569	-0.0030318	-0.0004077	0.002486	0.0055273	0.0086737	0.011982	0.015393	0.018821	0.022266	0.025674	0.029044	0.032305	0.035414	0.038427	0.041256	0.04386	0.046355	0.04874	0.051077	0.053368	0.055617	0.057908	0.060214	0.062429	0.064644	0.06677	0.068759	0.070547	0.072131	0.073493	0.074604	0.07543
-0.016767	-0.016866	-0.016901	-0.016894	-0.01684	-0.016732	-0.016562	-0.016355	-0.016076	-0.015701	-0.015189	-0.014579	-0.013733	-0.012682	-0.011367	-0.0097893	-0.0078876	-0.005725	-0.0032969	-0.0006727	0.0022293	0.0052813	0.0084306	0.011753	0.015186	0.018631	0.022097	0.02553	0.028942	0.032239	0.035376	0.038414	0.04126	0.04388	0.046382	0.048765	0.051105	0.053399	0.055657	0.057958	0.060274	0.062529	0.064766	0.066915	0.068927	0.070736	0.072339	0.073716	0.074851	0.0757
-0.021543	-0.02164	-0.021683	-0.021663	-0.021609	-0.02151	-0.021342	-0.021158	-0.020894	-0.020557	-0.020103	-0.019542	-0.018769	-0.017802	-0.016616	-0.015181	-0.01344	-0.011456	-0.0092352	-0.0068292	-0.0041783	-0.0013902	0.0015134	0.0045775	0.0077349	0.010916	0.014117	0.017291	0.020436	0.023478	0.026377	0.029182	0.031819	0.034256	0.036585	0.038813	0.040993	0.043133	0.04524	0.047372	0.049528	0.051612	0.053688	0.055676	0.05754	0.059213	0.060698	0.061985	0.063035	0.063821
-0.018494	-0.018581	-0.018612	-0.018611	-0.018568	-0.01848	-0.018361	-0.018177	-0.017936	-0.017602	-0.017161	-0.016604	-0.015841	-0.014892	-0.013702	-0.012276	-0.010549	-0.0085879	-0.006372	-0.003966	-0.0013136	0.001494	0.004401	0.0074844	0.010649	0.013832	0.017029	0.020187	0.023341	0.026385	0.029281	0.032093	0.034749	0.037181	0.039535	0.04179	0.044005	0.046188	0.048332	0.050514	0.052685	0.054795	0.05689	0.058901	0.060785	0.06249	0.063999	0.065295	0.066365	0.067162
-0.018249	-0.018327	-0.018357	-0.018346	-0.018295	-0.018204	-0.018067	-0.017868	-0.017605	-0.017254	-0.016795	-0.016203	-0.015404	-0.014423	-0.013172	-0.011699	-0.0099057	-0.0078729	-0.0055796	-0.0031014	-0.0003533	0.0025364	0.0055287	0.008703	0.011966	0.015245	0.01853	0.021783	0.025034	0.028153	0.031132	0.034018	0.036731	0.039218	0.041601	0.043872	0.046097	0.048287	0.050443	0.052649	0.054857	0.056998	0.059117	0.061157	0.063075	0.064811	0.066353	0.067682	0.068785	0.069611
-0.020275	-0.02035	-0.020383	-0.020369	-0.020313	-0.020209	-0.020079	-0.019879	-0.019613	-0.019258	-0.018795	-0.018206	-0.01741	-0.016423	-0.01519	-0.013717	-0.011932	-0.0099038	-0.0076214	-0.005149	-0.0024176	0.0004619	0.0034323	0.006582	0.0098047	0.013047	0.016287	0.019496	0.022697	0.025765	0.028693	0.031537	0.034207	0.036659	0.039026	0.04129	0.043509	0.0457	0.047845	0.050029	0.052205	0.054316	0.056403	0.05841	0.060289	0.062	0.063508	0.064802	0.065879	0.066665
-0.011781	-0.011884	-0.011957	-0.011976	-0.011943	-0.011874	-0.011774	-0.011627	-0.011373	-0.011032	-0.010577	-0.0099941	-0.0091766	-0.0081667	-0.0068887	-0.0053541	-0.0034741	-0.0013432	0.0010697	0.0036923	0.0065892	0.0096572	0.012838	0.01621	0.019677	0.023173	0.02668	0.03016	0.033634	0.036979	0.040168	0.043268	0.046183	0.048858	0.05144	0.0539	0.056311	0.058684	0.061024	0.063406	0.065788	0.068101	0.0704	0.072611	0.07467	0.076537	0.078188	0.079601	0.080767	0.081626
-0.01254	-0.01265	-0.012726	-0.012742	-0.012719	-0.012642	-0.012537	-0.01237	-0.01213	-0.011783	-0.011337	-0.010759	-0.0099579	-0.0089535	-0.007686	-0.0061733	-0.0043202	-0.0022147	0.00015	0.0027262	0.0055717	0.0085702	0.011673	0.014963	0.01835	0.021759	0.025187	0.028593	0.031997	0.035284	0.038419	0.041456	0.044306	0.046919	0.049432	0.051814	0.054146	0.056443	0.058706	0.061032	0.063359	0.065631	0.067891	0.070058	0.072086	0.073902	0.075509	0.076893	0.078027	0.078873
0.007183	0.0070109	0.0068914	0.0068125	0.0067593	0.0067665	0.0068101	0.0069117	0.0070953	0.0073613	0.0077392	0.0082533	0.0089837	0.0099245	0.011139	0.012606	0.014418	0.016507	0.018881	0.021474	0.024367	0.027438	0.030648	0.034066	0.037597	0.041173	0.04477	0.048351	0.051936	0.055401	0.058711	0.061934	0.064967	0.067766	0.070466	0.073031	0.075546	0.078032	0.080478	0.082977	0.085481	0.087912	0.090326	0.092647	0.094824	0.096792	0.098527	0.10001	0.10124	0.10215
0.00305	0.0028724	0.0027392	0.0026513	0.0026074	0.0025808	0.0026263	0.0027358	0.0029163	0.0031797	0.0035757	0.0041028	0.0048509	0.0057988	0.0070464	0.0085621	0.010432	0.012583	0.015033	0.017715	0.020702	0.023869	0.027172	0.030688	0.034319	0.037987	0.041676	0.045337	0.048989	0.052518	0.05589	0.05917	0.062275	0.065145	0.067923	0.070576	0.073179	0.075746	0.078269	0.080835	0.083402	0.085893	0.08836	0.090741	0.092958	0.094959	0.096728	0.098239	0.099483	0.1004
-0.0099893	-0.010085	-0.010149	-0.010151	-0.010113	-0.01003	-0.0099004	-0.0097099	-0.0094191	-0.0090288	-0.0085283	-0.0078842	-0.0069742	-0.0058481	-0.0044266	-0.0027252	-0.0006667	0.0016703	0.004297	0.0071364	0.010267	0.013564	0.016959	0.020547	0.02423	0.027923	0.031626	0.035293	0.038957	0.042492	0.045861	0.049138	0.05221	0.055033	0.057742	0.060321	0.062846	0.065325	0.067777	0.070281	0.072775	0.075198	0.077594	0.079893	0.082029	0.083947	0.085633	0.08707	0.088248	0.089122
-0.011464	-0.011539	-0.011585	-0.011584	-0.011533	-0.011438	-0.0113	-0.011109	-0.010815	-0.010428	-0.0099326	-0.0092899	-0.0084001	-0.0072971	-0.0059079	-0.0042516	-0.0022423	3.74e-005	0.0025947	0.0053531	0.0083863	0.011573	0.014865	0.018339	0.021894	0.025473	0.029053	0.032605	0.036155	0.039578	0.042847	0.046011	0.048988	0.051703	0.054311	0.056787	0.059206	0.061592	0.06395	0.066351	0.068758	0.07109	0.073406	0.075624	0.077686	0.079545	0.081177	0.082572	0.083712	0.084556
-0.014746	-0.014814	-0.014866	-0.014862	-0.014811	-0.014709	-0.014568	-0.014359	-0.014065	-0.013682	-0.013166	-0.012505	-0.01163	-0.01052	-0.0091282	-0.0074808	-0.0054796	-0.0032056	-0.0006548	0.0021061	0.0051572	0.0083643	0.011675	0.015179	0.01877	0.022383	0.026001	0.029586	0.033165	0.036617	0.039913	0.043095	0.046099	0.048849	0.051497	0.054013	0.056469	0.058888	0.061276	0.063709	0.066139	0.068505	0.070863	0.073116	0.075216	0.077109	0.078774	0.080195	0.081362	0.082218
-0.0080348	-0.0081115	-0.0081672	-0.0081608	-0.0081182	-0.0080224	-0.0079021	-0.0076984	-0.0073913	-0.0069942	-0.0064809	-0.0058115	-0.0048914	-0.003758	-0.0023159	-0.0006051	0.0014733	0.0038347	0.0064906	0.0093749	0.012558	0.015915	0.019373	0.023033	0.026775	0.030532	0.034304	0.038036	0.041745	0.045326	0.048733	0.052038	0.055156	0.058027	0.060814	0.063461	0.066066	0.068623	0.071136	0.073694	0.07624	0.078705	0.081144	0.083477	0.08565	0.087615	0.089343	0.090815	0.09201	0.092887
-0.007034	-0.0070976	-0.0071435	-0.0071334	-0.0070877	-0.0069904	-0.0068581	-0.0066508	-0.0063565	-0.0059547	-0.0054467	-0.0047765	-0.0038573	-0.0027268	-0.0012877	0.0004249	0.0025002	0.0048634	0.0075211	0.010411	0.013604	0.016962	0.020435	0.024108	0.02788	0.031671	0.03547	0.039233	0.042991	0.046608	0.050048	0.053389	0.056537	0.059421	0.0622	0.064857	0.067456	0.070012	0.072529	0.075096	0.07765	0.080128	0.08259	0.084945	0.087143	0.089126	0.090876	0.092369	0.093587	0.094489
-0.0085663	-0.0086228	-0.0086799	-0.0086702	-0.0086182	-0.0085212	-0.0083965	-0.0081839	-0.0078798	-0.0074757	-0.0069544	-0.0062541	-0.0053151	-0.0041569	-0.0026821	-0.0009194	0.001215	0.0036405	0.0063693	0.0093354	0.01262	0.01607	0.019639	0.023416	0.027286	0.031179	0.035094	0.038974	0.042848	0.046586	0.050151	0.0536	0.056837	0.059815	0.062687	0.065428	0.068102	0.070739	0.073338	0.075995	0.07864	0.081204	0.08375	0.08619	0.08847	0.090522	0.092325	0.093868	0.09513	0.096068
-0.018043	-0.018108	-0.018168	-0.018178	-0.018125	-0.018058	-0.017971	-0.017796	-0.017554	-0.017231	-0.016799	-0.01623	-0.01546	-0.014512	-0.013304	-0.011867	-0.010126	-0.0081456	-0.0059162	-0.0035057	-0.0008271	0.0019913	0.0049044	0.0079997	0.011173	0.014363	0.017571	0.020762	0.023952	0.027035	0.029975	0.032826	0.035509	0.037972	0.04035	0.042624	0.044846	0.047051	0.049228	0.051452	0.053677	0.055847	0.058002	0.060064	0.062	0.06375	0.06529	0.066616	0.067705	0.068515
-0.017774	-0.017837	-0.017888	-0.017896	-0.017846	-0.017777	-0.017679	-0.017496	-0.017246	-0.016908	-0.016459	-0.015871	-0.015086	-0.014124	-0.012897	-0.011437	-0.0096767	-0.0076713	-0.0054306	-0.0030042	-0.0003193	0.0025002	0.0054114	0.0084952	0.011653	0.01483	0.018009	0.021174	0.024334	0.027382	0.030289	0.033106	0.03575	0.038171	0.040505	0.042728	0.044908	0.047066	0.049202	0.051386	0.053575	0.055709	0.057825	0.059853	0.06175	0.06346	0.064971	0.066263	0.067328	0.06812
-0.017004	-0.017072	-0.017118	-0.01712	-0.017069	-0.01701	-0.016895	-0.016688	-0.016416	-0.016052	-0.015557	-0.014927	-0.014073	-0.013034	-0.011705	-0.010127	-0.008212	-0.0060433	-0.0036017	-0.0009484	0.0019864	0.0050826	0.0082893	0.011686	0.015176	0.018681	0.022198	0.025688	0.029152	0.032491	0.035652	0.038705	0.041566	0.044173	0.046684	0.049073	0.051412	0.053727	0.056007	0.058333	0.060651	0.06291	0.065157	0.067316	0.069341	0.071183	0.072819	0.07422	0.075385	0.076258
-0.012841	-0.012923	-0.012979	-0.012978	-0.012926	-0.012874	-0.012759	-0.012564	-0.012275	-0.011884	-0.011354	-0.01068	-0.0097709	-0.0086292	-0.0071907	-0.0054765	-0.0034001	-0.001039	0.0016133	0.0044922	0.0076768	0.011033	0.014507	0.018188	0.021972	0.02578	0.029606	0.033411	0.037198	0.040849	0.044323	0.047668	0.050801	0.053658	0.056403	0.058994	0.061542	0.064052	0.066531	0.069082	0.071643	0.074135	0.07662	0.079003	0.081227	0.083245	0.085032	0.08657	0.087839	0.088786
-0.010843	-0.010917	-0.010985	-0.01097	-0.010926	-0.010849	-0.01073	-0.010525	-0.010218	-0.0098165	-0.0092777	-0.0085837	-0.0076352	-0.0064601	-0.0049761	-0.0032119	-0.0010717	0.0013761	0.0041229	0.0071007	0.010392	0.013867	0.017456	0.021264	0.025162	0.029078	0.033004	0.03689	0.040759	0.044481	0.048012	0.051409	0.054589	0.057495	0.060282	0.062934	0.065523	0.068093	0.070621	0.073217	0.075817	0.078345	0.080865	0.083292	0.085561	0.087611	0.089427	0.090988	0.092273	0.093228
-0.013464	-0.013541	-0.013598	-0.013599	-0.013559	-0.013485	-0.013367	-0.013155	-0.01285	-0.012454	-0.011903	-0.011194	-0.010251	-0.0090602	-0.007569	-0.0057916	-0.0036379	-0.0011812	0.001583	0.0045771	0.0078768	0.011362	0.014957	0.018767	0.022667	0.026579	0.030503	0.034402	0.038284	0.04202	0.04557	0.048999	0.052215	0.055159	0.057998	0.060695	0.063334	0.065943	0.068511	0.071129	0.073755	0.076306	0.07884	0.081271	0.083546	0.085605	0.087421	0.088976	0.090249	0.091196
-0.0093935	-0.0094873	-0.0095626	-0.0095507	-0.0095218	-0.0094484	-0.0093271	-0.0091229	-0.0088299	-0.0084283	-0.0078963	-0.0071992	-0.0062512	-0.0050776	-0.003595	-0.0018315	0.000299	0.0027278	0.0054618	0.0084258	0.011691	0.015134	0.01869	0.022447	0.026304	0.030183	0.034065	0.037923	0.041763	0.045472	0.049002	0.052408	0.055601	0.058526	0.061349	0.064035	0.066662	0.069261	0.07182	0.074427	0.077039	0.079578	0.082103	0.08452	0.086782	0.088822	0.090623	0.092167	0.093431	0.094366
-0.011369	-0.011444	-0.011497	-0.011488	-0.011449	-0.011376	-0.011265	-0.011085	-0.010801	-0.010433	-0.0099315	-0.0092884	-0.0084262	-0.00736	-0.0059975	-0.0043818	-0.0024352	-0.0002259	0.0022588	0.0049408	0.0078964	0.011006	0.014223	0.017615	0.021086	0.024577	0.028087	0.031575	0.035063	0.038427	0.041622	0.0447	0.047584	0.05022	0.052758	0.055165	0.057526	0.059856	0.062157	0.06452	0.066891	0.069201	0.071494	0.073694	0.075748	0.07759	0.079205	0.080583	0.081713	0.082547
-0.0064648	-0.0065203	-0.0065751	-0.0065578	-0.0064824	-0.0063872	-0.0062544	-0.0060157	-0.0056919	-0.0052725	-0.0047111	-0.003986	-0.0030272	-0.001829	-0.0003351	0.0014548	0.0035907	0.0060185	0.0087497	0.011697	0.014937	0.018347	0.021868	0.025588	0.029398	0.033225	0.037066	0.040878	0.044681	0.048349	0.051844	0.055223	0.058394	0.061293	0.064084	0.06673	0.069317	0.071878	0.074395	0.07697	0.079543	0.08204	0.084508	0.086881	0.089088	0.09107	0.092816	0.094298	0.095508	0.096396
-0.0089266	-0.008995	-0.009044	-0.0090337	-0.0089722	-0.0088809	-0.0087494	-0.0085272	-0.0082007	-0.0077796	-0.0072274	-0.00651	-0.0055422	-0.0043562	-0.0028476	-0.0010597	0.0010944	0.0035266	0.006262	0.0092175	0.012476	0.015896	0.019427	0.023153	0.02697	0.030813	0.034673	0.038511	0.042331	0.046014	0.049529	0.052922	0.05611	0.059029	0.061852	0.064523	0.06713	0.069708	0.072244	0.07484	0.077429	0.07994	0.082439	0.084823	0.087046	0.089037	0.090785	0.092277	0.093489	0.094379
-0.015988	-0.016054	-0.016092	-0.016086	-0.016025	-0.015954	-0.015832	-0.015619	-0.015324	-0.014934	-0.014418	-0.013752	-0.012873	-0.011782	-0.010398	-0.0087587	-0.0067888	-0.0045457	-0.0020168	0.000718	0.003739	0.006911	0.0102	0.013682	0.017254	0.020853	0.024462	0.02804	0.031617	0.035061	0.03833	0.041482	0.044427	0.047107	0.049686	0.052126	0.05451	0.056869	0.05921	0.061618	0.064035	0.066396	0.068741	0.070999	0.073111	0.075027	0.076714	0.078172	0.079373	0.08028
-0.014123	-0.014199	-0.014267	-0.014266	-0.014209	-0.014125	-0.013994	-0.013796	-0.013511	-0.013114	-0.01259	-0.011921	-0.011009	-0.0098781	-0.0084508	-0.0067462	-0.0046847	-0.0023425	0.0002918	0.0031444	0.0062904	0.009601	0.013027	0.016647	0.020362	0.024088	0.027815	0.031519	0.035201	0.038749	0.042127	0.045385	0.04844	0.051227	0.053902	0.056448	0.058938	0.061393	0.063819	0.066302	0.068792	0.071209	0.073614	0.07592	0.078075	0.080019	0.081733	0.083206	0.084412	0.085311
-0.018059	-0.018118	-0.01815	-0.018144	-0.018083	-0.01798	-0.017845	-0.017635	-0.017353	-0.016972	-0.016467	-0.015828	-0.014956	-0.013894	-0.01255	-0.010956	-0.0090321	-0.0068613	-0.0044302	-0.0018021	0.001085	0.004114	0.0072371	0.010533	0.013902	0.017291	0.020678	0.024039	0.027388	0.030617	0.033691	0.036678	0.039475	0.042031	0.044483	0.046822	0.049102	0.051347	0.053559	0.055829	0.058094	0.060299	0.062479	0.064565	0.066503	0.068239	0.069765	0.071064	0.072125	0.072897
-0.013918	-0.014015	-0.01408	-0.014091	-0.014054	-0.013961	-0.013842	-0.013644	-0.013359	-0.012966	-0.012461	-0.011803	-0.010914	-0.0098103	-0.0084233	-0.0067725	-0.0047646	-0.0024936	6.54e-005	0.002824	0.0058631	0.0090578	0.012354	0.015832	0.0194	0.022987	0.026583	0.030157	0.033724	0.037171	0.040471	0.043684	0.046721	0.049532	0.052259	0.054867	0.057417	0.059922	0.062384	0.064886	0.067359	0.069749	0.072105	0.074352	0.076437	0.078299	0.079933	0.081313	0.082425	0.083217
-0.012853	-0.012948	-0.01302	-0.013041	-0.012992	-0.012924	-0.012805	-0.012613	-0.012331	-0.011954	-0.011463	-0.010818	-0.0099485	-0.0088697	-0.0075092	-0.0058902	-0.0039427	-0.001737	0.0007339	0.0034053	0.0063366	0.0094132	0.012586	0.015939	0.019379	0.022844	0.02633	0.029813	0.033291	0.036655	0.039879	0.043015	0.045963	0.04867	0.051277	0.053762	0.056195	0.058585	0.06094	0.063337	0.065723	0.068039	0.07033	0.072509	0.074527	0.076328	0.077899	0.079226	0.0803	0.081084
-0.013614	-0.013697	-0.013746	-0.013753	-0.013703	-0.013612	-0.013475	-0.01328	-0.012987	-0.012591	-0.012083	-0.011428	-0.010541	-0.0094341	-0.0080519	-0.0064024	-0.0044091	-0.0021361	0.0004207	0.003199	0.0062696	0.0095104	0.012861	0.01642	0.020078	0.023757	0.027448	0.031112	0.034758	0.038267	0.041602	0.044817	0.047834	0.050598	0.05325	0.055781	0.058254	0.060687	0.063088	0.065534	0.067982	0.070366	0.072737	0.075024	0.077171	0.079112	0.080831	0.082311	0.083525	0.084433
-0.011571	-0.01166	-0.011712	-0.011695	-0.011653	-0.011546	-0.011411	-0.011219	-0.010935	-0.010543	-0.010044	-0.009408	-0.0085466	-0.0074755	-0.0061324	-0.0045398	-0.0026009	-0.0004023	0.0020716	0.0047533	0.0077227	0.010851	0.014092	0.017528	0.021064	0.024625	0.0282	0.031741	0.035261	0.038653	0.041878	0.04499	0.047902	0.050552	0.053093	0.055508	0.057873	0.060202	0.0625	0.064856	0.067219	0.069521	0.071813	0.074018	0.076084	0.077959	0.079613	0.081039	0.082222	0.083115
-0.0067864	-0.006867	-0.0069098	-0.0069	-0.006849	-0.0067464	-0.0066114	-0.0064198	-0.0061461	-0.005784	-0.0053133	-0.004707	-0.0038752	-0.0028465	-0.0015431	1.66e-005	0.0019201	0.0040853	0.0065385	0.0092116	0.012166	0.015298	0.018555	0.022013	0.025565	0.029158	0.032773	0.036376	0.039988	0.04348	0.046832	0.05009	0.053177	0.056029	0.058782	0.061418	0.064012	0.066575	0.069106	0.071695	0.07428	0.076785	0.079268	0.081641	0.083858	0.085855	0.087611	0.08911	0.090339	0.091242
-0.010698	-0.010794	-0.010846	-0.010839	-0.010802	-0.01071	-0.010575	-0.010387	-0.010117	-0.0097484	-0.0092873	-0.0086978	-0.0078949	-0.0068978	-0.005642	-0.0041427	-0.002323	-0.0002523	0.0020779	0.0046136	0.0074245	0.01039	0.01347	0.016748	0.020123	0.023525	0.026955	0.030382	0.033812	0.037141	0.040321	0.04342	0.046347	0.04905	0.051666	0.05415	0.056586	0.058993	0.061371	0.063805	0.06625	0.068621	0.07097	0.073221	0.07532	0.077213	0.078872	0.080291	0.081449	0.082309
-0.0066873	-0.0067712	-0.0068064	-0.00679	-0.0067323	-0.0066373	-0.0065094	-0.0063124	-0.0060567	-0.0057318	-0.0053041	-0.0047621	-0.0040162	-0.0030949	-0.001937	-0.0005547	0.0011259	0.0030433	0.0051974	0.0075519	0.010167	0.01294	0.015816	0.018873	0.022024	0.025201	0.028403	0.031579	0.03475	0.037819	0.040753	0.043595	0.046287	0.048756	0.051153	0.053431	0.055676	0.057879	0.060049	0.062273	0.064489	0.066638	0.068773	0.070819	0.072736	0.074467	0.07599	0.077299	0.078378	0.079171
-0.0078801	-0.0079524	-0.0079903	-0.0079823	-0.0079345	-0.0078406	-0.0077255	-0.0075317	-0.0072746	-0.0069371	-0.0065135	-0.0059713	-0.0052344	-0.0043291	-0.0031765	-0.0018035	-0.0001438	0.0017412	0.0038618	0.0061709	0.0087351	0.011446	0.014263	0.017274	0.020379	0.023522	0.02669	0.029854	0.033028	0.036095	0.03903	0.041882	0.044556	0.047008	0.049355	0.051584	0.053765	0.055912	0.058043	0.060235	0.062442	0.064592	0.06673	0.068785	0.070707	0.072443	0.073974	0.075285	0.076374	0.077192
0.010202	0.010089	0.01003	0.010027	0.010092	0.010224	0.0104	0.010677	0.011054	0.011567	0.012228	0.013089	0.014264	0.015709	0.017534	0.019705	0.022336	0.025319	0.028648	0.032239	0.036201	0.04036	0.044654	0.049202	0.05386	0.058558	0.063284	0.067984	0.072693	0.077256	0.081615	0.085827	0.089798	0.093419	0.096894	0.10019	0.1034	0.10655	0.10965	0.11282	0.11598	0.11903	0.12206	0.12494	0.12759	0.12996	0.13203	0.13379	0.13521	0.13626
-0.0050331	-0.0051376	-0.005198	-0.0052048	-0.0051516	-0.0050467	-0.0049069	-0.0046812	-0.0043648	-0.0039551	-0.0034172	-0.0027266	-0.0017891	-0.0006289	0.0008118	0.0025298	0.0046066	0.0069581	0.0095973	0.012468	0.015633	0.018972	0.022431	0.026107	0.02989	0.033705	0.037538	0.04136	0.045172	0.048852	0.052351	0.055734	0.058909	0.061804	0.064578	0.067209	0.069774	0.072299	0.074788	0.077343	0.079887	0.082365	0.08483	0.087182	0.089387	0.091379	0.093131	0.094637	0.095867	0.096791
0.015558	0.015455	0.015403	0.015406	0.015464	0.01559	0.01576	0.016011	0.01638	0.016861	0.017499	0.018321	0.019422	0.020797	0.022529	0.024587	0.027094	0.029948	0.033151	0.036618	0.040457	0.044505	0.048709	0.053174	0.057779	0.062426	0.067103	0.071765	0.076424	0.080939	0.085246	0.089409	0.093334	0.096932	0.10038	0.10365	0.10684	0.10997	0.11306	0.11622	0.11938	0.12246	0.12551	0.12842	0.13113	0.13356	0.1357	0.13752	0.13901	0.14011
-0.0071361	-0.0072424	-0.0072961	-0.0072976	-0.0072569	-0.0071528	-0.007012	-0.006789	-0.0064729	-0.0060472	-0.0054936	-0.0047729	-0.0038059	-0.0026046	-0.0010848	0.0007228	0.0029113	0.005394	0.0082004	0.011229	0.01457	0.018087	0.021733	0.025585	0.029545	0.033529	0.037516	0.041476	0.045421	0.049223	0.052843	0.056342	0.059627	0.062617	0.065485	0.068202	0.070865	0.073477	0.076053	0.07869	0.08133	0.083902	0.086454	0.088904	0.091184	0.093247	0.09506	0.096614	0.097889	0.098843
0.0051164	0.0050404	0.0049914	0.0050008	0.0050533	0.0051541	0.0052948	0.0054945	0.0057824	0.0061609	0.0066502	0.0072884	0.0081368	0.0092013	0.010559	0.012171	0.014129	0.016372	0.018902	0.021651	0.024704	0.027939	0.03129	0.034858	0.038537	0.042252	0.045989	0.049711	0.053443	0.057048	0.06049	0.063829	0.066978	0.069871	0.072663	0.075325	0.07793	0.080503	0.083041	0.085633	0.08822	0.090722	0.093215	0.0956	0.097818	0.099823	0.10158	0.1031	0.10434	0.10526
-0.0037009	-0.0038175	-0.0038672	-0.0038641	-0.0038232	-0.0037099	-0.0035506	-0.003304	-0.0029749	-0.0025292	-0.0019444	-0.0011961	-0.0001864	0.001067	0.002648	0.0045202	0.0067885	0.009357	0.012234	0.015338	0.018769	0.022375	0.026102	0.030044	0.034103	0.038194	0.042302	0.046386	0.050466	0.054397	0.058143	0.061754	0.065135	0.068205	0.071128	0.073883	0.076573	0.079208	0.081819	0.084507	0.087208	0.089839	0.09246	0.094971	0.097305	0.099418	0.10127	0.10285	0.10417	0.10515
[truncated: 650 more columns]
