# Supplementary material for: A Comparison of Sparse Partial Least Squares and Elastic Net in Wavelength Selection on NIR Spectroscopy Data
Source: Int J Anal Chem. 2019 Aug 1;2019:7314916. doi: 10.1155/2019/7314916 (PMC6699329; doi:10.1155/2019/7314916)
Supplement: Supplementary Materials — Three real data sets used in Section 4. All the data sets are saved as “.txt” format and can be used freely. [file 7314916.f1.zip › 7314916.f1/mp6spec.txt]

-0.022701 -0.022803 -0.02288 -0.022914 -0.022902 -0.022848 -0.022722 -0.022522 -0.022215 -0.021807 -0.02125 -0.020535 -0.019615 -0.01848 -0.017081 -0.015409 -0.013454 -0.011236 -0.0087045 -0.0059768 -0.0030191 0.0001548 0.0034779 0.0069463 0.010455 0.014024 0.017649 0.021164 0.024601 0.027994 0.031242 0.034346 0.03728 0.040052 0.04274 0.045279 0.047718 0.050146 0.052527 0.054888 0.057231 0.059521 0.061798 0.063937 0.065961 0.067827 0.069462 0.070846 0.072029 0.07291 0.073569 0.073918 0.074024 0.073828 0.073356 0.072594 0.071568 0.070271 0.068743 0.067055 0.065254 0.063342 0.06144 0.059553 0.057714 0.055975 0.054301 0.052784 0.05139 0.050105 0.048969 0.047952 0.047045 0.046273 0.04557 0.044979 0.044456 0.043987 0.043574 0.043203 0.042856 0.042535 0.042231 0.04192 0.041612 0.041276 0.040939 0.040561 0.040161 0.039741 0.039286 0.038827 0.038371 0.037919 0.037492 0.037113 0.036772 0.036498 0.036278 0.036155 0.03611 0.036161 0.036307 0.036569 0.036942 0.037432 0.038068 0.038835 0.039739 0.040805 0.042024 0.043425 0.044974 0.046681 0.048617 0.050679 0.052925 0.055313 0.057837 0.060519 0.063282 0.066119 0.069107 0.072111 0.075168 0.078234 0.081267 0.08434 0.087293 0.090159 0.092952 0.095594 0.098137 0.10054 0.10285 0.10516 0.10738 0.10963 0.11194 0.11438 0.11705 0.11996 0.12316 0.12682 0.13081 0.13528 0.14015 0.14544 0.15135 0.15768 0.16455 0.17194 0.17976 0.1881 0.1967 0.2055 0.21468 0.22378 0.23295 0.24195 0.2507 0.25932 0.26744 0.27511 0.28235 0.28891 0.29503 0.30036 0.30512 0.30932 0.3129 0.31598 0.31858 0.32077 0.32263 0.32419 0.32547 0.32655 0.32742 0.32816 0.32872 0.32914 0.32942 0.32953 0.32951 0.3293 0.32896 0.32844 0.3278 0.32705 0.32621 0.32531 0.32431 0.32327 0.32217 0.32103 0.31979 0.31854 0.31724 0.3159 0.31447 0.31312 0.31166 0.31022 0.30879 0.30733 0.30589 0.30448 0.30311 0.30178 0.30052 0.29929 0.29818 0.29708 0.29601 0.29508 0.29423 0.29347 0.29277 0.29214 0.29157 0.29108 0.2906 0.29018 0.28976 0.28939 0.28905 0.28873 0.28841 0.28809 0.28776 0.28744 0.28709 0.28671 0.28627 0.28577 0.28519 0.28454 0.28378 0.28294 0.28198 0.28093 0.27979 0.2785 0.27712 0.27561 0.274 0.27231 0.27048 0.2686 0.26663 0.26462 0.26258 0.26048 0.25838 0.25627 0.25417 0.2521 0.25 0.24796 0.24594 0.24394 0.24199 0.24005 0.23816 0.2363 0.23449 0.23272 0.23098 0.2293 0.22769 0.22613 0.22465 0.22322 0.22189 0.22065 0.21952 0.2185 0.21761 0.21685 0.21621 0.21569 0.21529 0.21502 0.2149 0.215 0.21535 0.21599 0.21701 0.21834 0.22009 0.2222 0.22467 0.22752 0.23056 0.23377 0.23692 0.23997 0.24285 0.2454 0.24767 0.24951 0.25098 0.25213 0.25295 0.25359 0.25409 0.25453 0.25495 0.25537 0.25579 0.2562 0.25655 0.25685 0.25704 0.25713 0.25718 0.25723 0.25737 0.25766 0.25814 0.25877 0.25954 0.26036 0.2612 0.26198 0.26267 0.26326 0.26375 0.26416 0.26448 0.26471 0.2649 0.26499 0.26505 0.26509 0.26509 0.26499 0.26478 0.2644 0.26384 0.26308 0.26216 0.26107 0.25981 0.25845 0.25697 0.25547 0.25393 0.25236 0.25084 0.24932 0.24787 0.24651 0.24523 0.24404 0.24294 0.24191 0.24093 0.23995 0.23894 0.23787 0.23674 0.23552 0.23425 0.23292 0.23154 0.23023 0.22876 0.22728 0.22579 0.22435 0.22303 0.22188 0.22095 0.22024 0.21984 0.21971 0.21988 0.22038 0.2212 0.22237 0.2239 0.22585 0.2282 0.23113 0.2345 0.23844 0.24295 0.24815 0.25418 0.26106 0.26914 0.27814 0.28834 0.29963 0.31186 0.32505 0.33889 0.35356 0.36833 0.38332 0.39799 0.41214 0.42577 0.43838 0.45032 0.46124 0.47125 0.4803 0.48832 0.49544 0.50133 0.50622 0.50999 0.51253 0.51393 0.5142 0.51348 0.51176 0.50923 0.50608 0.50246 0.49847 0.49425 0.48986 0.48542 0.4809 0.47642 0.47195 0.46753 0.46316 0.45884 0.45459 0.45035 0.4462 0.44203 0.43791 0.43384 0.42976 0.42578 0.42179 0.41795 0.41416 0.41051 0.40702 0.40371 0.40064 0.39776 0.39522 0.39296 0.39103 0.38945 0.38828 0.38748 0.38707 0.38702 0.38741 0.38821 0.3894 0.39098 0.39299 0.39539 0.39809 0.40117 0.40446 0.40808 0.41183 0.41578 0.41985 0.424 0.42822 0.43244 0.43672 0.4409 0.44508 0.44908 0.453 0.45671 0.46027 0.46365 0.46681 0.46992 0.47278 0.47558 0.47817 0.48068 0.483 0.48522 0.48728 0.48921 0.491 0.49263 0.49419 0.49554 0.49681 0.49791 0.49889 0.49972 0.50042 0.50098 0.50136 0.50161 0.50169 0.50162 0.50138 0.50099 0.50043 0.49973 0.49885 0.4978 0.49656 0.49515 0.49356 0.49181 0.48989 0.48794 0.48594 0.48396 0.48195 0.47992 0.47789 0.47578 0.47363 0.47135 0.46906 0.46668 0.46431 0.46191 0.45952 0.45713 0.45477 0.45241 0.45005 0.44768 0.44527 0.44285 0.4404 0.43793 0.43541 0.43296 0.43047 0.42807 0.42566 0.42335 0.42107 0.41885 0.41669 0.41458 0.41251 0.41043 0.40845 0.40647 0.40458 0.4027 0.40093 0.39925 0.39768 0.39623 0.39497 0.39384 0.39295 0.39236 0.39206 0.39213 0.39261 0.3935 0.3949 0.39674 0.39917 0.40207 0.40555 0.40951 0.41407 0.41903 0.42446 0.4302 0.43626 0.44246 0.44876 0.45504 0.46132 0.4675 0.47365 0.47981 0.48597 0.49222 0.49852 0.50472 0.51046 0.51556 0.51951 0.52228 0.52381 0.52428 0.52419 0.52395 0.52397 0.52453 0.52574 0.52757 0.52993 0.53249 0.53497 0.53702 0.53844 0.53929 0.53963 0.53957 0.5393 0.53892 0.53844 0.53783 0.53707 0.53621 0.53525 0.53435 0.53349 0.53279 0.53228 0.53189 0.53152 0.53101 0.5302 0.52904 0.52756 0.526 0.52449 0.52325 0.52241 0.5219 0.52168 0.52166 0.52168 0.52172 0.52175 0.52172 0.52158 0.52144 0.52118 0.52095 0.52079 0.52073 0.52085 0.52118 0.52181 0.52263 0.52389 0.52548 0.52743 0.52969 0.53238 0.5353 0.53847 0.54183 0.54533 0.54887 0.55254 0.55622 0.55989 0.56357 0.56715 0.57087 0.5745 0.57825 0.58207 0.58602 0.59003 0.59419 0.59847 0.60288 0.60716 0.61144 0.61561 0.6199 0.62382 0.6278 0.63157 0.63532 0.63889 0.64243 0.64585 0.64923 0.65238 0.65553 0.65856 0.66134 0.66391 0.66627 0.66839 0.67024 0.67174 0.67309 0.67412 0.67476 0.67515 0.67524 0.67508 0.67468 0.67406
-0.021921 -0.022055 -0.022161 -0.022221 -0.022226 -0.022188 -0.022073 -0.021879 -0.02158 -0.021183 -0.020628 -0.019925 -0.01901 -0.017867 -0.016484 -0.014816 -0.012866 -0.010647 -0.008116 -0.0053928 -0.0024375 0.0007504 0.0040841 0.0075609 0.011084 0.014662 0.0183 0.021825 0.025274 0.028679 0.031932 0.035045 0.037979 0.040761 0.043466 0.046004 0.048461 0.050907 0.053293 0.05567 0.058021 0.060327 0.062613 0.064766 0.066804 0.068681 0.070332 0.071729 0.072921 0.073802 0.074452 0.074801 0.0749 0.074693 0.07421 0.07343 0.072383 0.071072 0.069525 0.06782 0.065996 0.064067 0.062145 0.060244 0.058385 0.056627 0.05494 0.053408 0.051993 0.050693 0.049546 0.048516 0.047601 0.046824 0.046118 0.045521 0.044995 0.044518 0.044105 0.043727 0.043376 0.043043 0.042732 0.042418 0.042096 0.04176 0.04141 0.041024 0.040619 0.040196 0.039744 0.039278 0.038816 0.038363 0.037938 0.037553 0.037207 0.036933 0.036715 0.036594 0.036546 0.036602 0.036745 0.037014 0.037384 0.037883 0.03852 0.039291 0.040202 0.041271 0.042505 0.043916 0.045478 0.047199 0.049142 0.051219 0.053475 0.05588 0.058425 0.061134 0.063929 0.066794 0.069814 0.072856 0.075964 0.079072 0.082154 0.085271 0.088257 0.091146 0.093952 0.096598 0.099145 0.10155 0.10387 0.10618 0.10842 0.11069 0.11304 0.11554 0.11827 0.12124 0.12449 0.1282 0.13221 0.13673 0.14166 0.14699 0.15299 0.1594 0.16637 0.17386 0.18178 0.19023 0.19891 0.20782 0.21709 0.22628 0.23554 0.24463 0.25347 0.26216 0.27035 0.2781 0.2854 0.29203 0.29822 0.30359 0.30841 0.31265 0.31629 0.31941 0.32204 0.32427 0.32617 0.32775 0.32906 0.33017 0.33106 0.33182 0.33241 0.33285 0.33316 0.3333 0.33331 0.33312 0.33279 0.33229 0.33167 0.3309 0.33005 0.32912 0.3281 0.32703 0.32588 0.32468 0.32344 0.32213 0.3208 0.31943 0.31797 0.31664 0.31518 0.31376 0.31233 0.3109 0.30948 0.30809 0.30674 0.30544 0.30417 0.30297 0.30187 0.3008 0.29974 0.29882 0.29797 0.29721 0.2965 0.29588 0.2953 0.2948 0.29432 0.29388 0.29347 0.29308 0.29271 0.29237 0.29204 0.29172 0.29138 0.29104 0.29068 0.29028 0.28983 0.28931 0.2887 0.28804 0.28726 0.2864 0.28544 0.28436 0.28319 0.28187 0.28047 0.27893 0.2773 0.27558 0.27371 0.27179 0.2698 0.26775 0.26568 0.26354 0.26141 0.25927 0.25714 0.25503 0.25289 0.25081 0.24875 0.24672 0.24474 0.24276 0.24085 0.23896 0.23711 0.23532 0.23355 0.23185 0.2302 0.2286 0.22709 0.22563 0.22427 0.22299 0.22183 0.22079 0.21985 0.21904 0.21837 0.21781 0.21737 0.21706 0.21691 0.21698 0.21731 0.21793 0.21892 0.22024 0.22198 0.22408 0.22655 0.22941 0.23246 0.23568 0.23885 0.24192 0.2448 0.24732 0.24957 0.25136 0.25279 0.25389 0.25466 0.25525 0.25571 0.25611 0.25649 0.25688 0.25729 0.25771 0.25807 0.25839 0.25864 0.25881 0.25894 0.25908 0.25932 0.25968 0.26024 0.26094 0.26178 0.26266 0.26353 0.26433 0.26503 0.26563 0.26612 0.26654 0.26687 0.26712 0.26733 0.26747 0.26759 0.26767 0.26771 0.26766 0.26749 0.26715 0.2666 0.26584 0.26491 0.26381 0.26254 0.26116 0.25967 0.25813 0.25658 0.25499 0.25344 0.25192 0.25045 0.24908 0.24778 0.2466 0.24549 0.24447 0.24349 0.24252 0.24153 0.24047 0.23933 0.2381 0.23681 0.23546 0.23405 0.23272 0.23124 0.22972 0.22819 0.2267 0.22534 0.22414 0.22317 0.22246 0.22206 0.22195 0.22215 0.22269 0.22357 0.2248 0.22644 0.2285 0.23096 0.23396 0.2374 0.24138 0.24593 0.25121 0.25732 0.26429 0.2725 0.28165 0.29207 0.30353 0.31598 0.32936 0.34344 0.35828 0.37331 0.38846 0.40334 0.41767 0.43143 0.44418 0.45626 0.4673 0.47746 0.4866 0.49473 0.50194 0.50792 0.51287 0.51664 0.51926 0.52067 0.52099 0.52032 0.5186 0.51609 0.51294 0.50927 0.50525 0.501 0.49658 0.49212 0.48755 0.48304 0.47853 0.47406 0.46966 0.46529 0.46102 0.45669 0.4525 0.44827 0.44411 0.43999 0.43589 0.43187 0.42782 0.42393 0.42009 0.4164 0.41286 0.40951 0.40639 0.40349 0.4009 0.39859 0.39664 0.39502 0.39379 0.39296 0.39251 0.39246 0.39282 0.39358 0.39475 0.39632 0.39831 0.40067 0.40336 0.40642 0.40973 0.41332 0.41705 0.42098 0.42506 0.4292 0.43344 0.43767 0.44194 0.44612 0.45032 0.45434 0.45825 0.46202 0.4656 0.46901 0.47223 0.47531 0.47819 0.48101 0.48363 0.48614 0.48853 0.49076 0.49287 0.49481 0.49663 0.4983 0.49988 0.50125 0.5025 0.50363 0.50463 0.50546 0.50618 0.50674 0.50717 0.50744 0.50753 0.50746 0.50722 0.50686 0.5063 0.50559 0.50472 0.50367 0.50243 0.50104 0.49944 0.49769 0.49578 0.49383 0.49181 0.48977 0.48773 0.48568 0.48363 0.48149 0.47932 0.47704 0.47474 0.47233 0.46996 0.46753 0.46512 0.46272 0.46033 0.45792 0.45555 0.45315 0.45073 0.4483 0.44584 0.44333 0.44079 0.4383 0.43576 0.43334 0.43093 0.4286 0.42633 0.4241 0.42195 0.41984 0.41779 0.41574 0.41378 0.41182 0.40991 0.40804 0.40628 0.40457 0.40297 0.4015 0.40019 0.39901 0.39808 0.39743 0.39707 0.39712 0.39753 0.39841 0.39975 0.40156 0.40397 0.40684 0.41033 0.41428 0.41887 0.42384 0.42929 0.43507 0.44119 0.44744 0.45382 0.46016 0.46651 0.47274 0.47895 0.48516 0.49138 0.49772 0.50404 0.51033 0.51616 0.52132 0.52537 0.52815 0.52962 0.53009 0.52993 0.52963 0.52956 0.53002 0.53118 0.533 0.53529 0.53782 0.54026 0.54236 0.54388 0.54471 0.54508 0.54507 0.54483 0.54449 0.54401 0.5434 0.54265 0.54179 0.54082 0.5399 0.53905 0.53834 0.53777 0.53734 0.53692 0.53642 0.53559 0.5344 0.53296 0.5314 0.52992 0.52873 0.5279 0.52744 0.52725 0.52725 0.52736 0.52742 0.52749 0.52745 0.52737 0.52723 0.52702 0.5268 0.52666 0.52667 0.52684 0.52724 0.52787 0.52875 0.53001 0.53167 0.5336 0.5359 0.53862 0.54165 0.54488 0.54833 0.5519 0.55557 0.55924 0.563 0.56668 0.57044 0.57414 0.57779 0.58149 0.5853 0.58912 0.59307 0.59716 0.60138 0.60561 0.60994 0.61422 0.61864 0.62289 0.62716 0.63117 0.63511 0.63893 0.64263 0.64621 0.6498 0.65329 0.65665 0.65986 0.66303 0.6661 0.66889 0.67152 0.6738 0.67594 0.67775 0.67933 0.6806 0.68171 0.6825 0.68285 0.68312 0.68294 0.68265 0.68216
-0.02086 -0.020993 -0.021107 -0.021176 -0.021187 -0.021159 -0.021076 -0.02091 -0.020637 -0.020264 -0.019743 -0.019093 -0.018232 -0.017154 -0.015834 -0.014253 -0.012412 -0.010309 -0.0079102 -0.0053211 -0.0025323 0.0004775 0.0036188 0.0069013 0.01022 0.013587 0.017015 0.020339 0.023601 0.026827 0.029926 0.032904 0.035729 0.038419 0.041047 0.043517 0.045915 0.048288 0.050606 0.052903 0.055173 0.057378 0.059566 0.061609 0.063534 0.065301 0.066846 0.068141 0.06923 0.070026 0.0706 0.070876 0.070918 0.070675 0.070171 0.069397 0.068382 0.067126 0.065653 0.064048 0.062348 0.060544 0.058752 0.056978 0.055244 0.053608 0.052029 0.050598 0.04928 0.048063 0.046991 0.046025 0.045168 0.044439 0.043782 0.043228 0.042737 0.042297 0.041917 0.041576 0.041253 0.040958 0.040674 0.040386 0.040095 0.039786 0.039467 0.039111 0.038731 0.038327 0.037899 0.037449 0.036998 0.036552 0.03613 0.035751 0.035405 0.035125 0.0349 0.034764 0.034707 0.034738 0.034856 0.035098 0.035436 0.035892 0.036484 0.0372 0.038055 0.039058 0.040215 0.041539 0.043005 0.044629 0.046468 0.048434 0.050576 0.052867 0.055289 0.057872 0.060549 0.063292 0.066194 0.069117 0.072102 0.075095 0.078061 0.081059 0.083929 0.086708 0.0894 0.091933 0.094363 0.09666 0.098861 0.10104 0.10316 0.10528 0.10748 0.1098 0.11233 0.11509 0.11811 0.12154 0.12529 0.12951 0.13412 0.13916 0.14476 0.15077 0.15732 0.16439 0.17188 0.17988 0.1881 0.19657 0.20539 0.21416 0.223 0.2317 0.24017 0.24852 0.25641 0.26386 0.27091 0.27732 0.28331 0.28852 0.29316 0.29727 0.30078 0.30378 0.30631 0.30846 0.31028 0.3118 0.31308 0.31416 0.31505 0.3158 0.31639 0.31685 0.31717 0.31734 0.31738 0.31725 0.31698 0.31654 0.31598 0.3153 0.31455 0.3137 0.31277 0.31179 0.31075 0.30967 0.30853 0.30734 0.30613 0.30487 0.30359 0.30237 0.30099 0.29967 0.29837 0.29702 0.29572 0.29441 0.29317 0.29197 0.29077 0.28964 0.28857 0.28754 0.28655 0.28567 0.28486 0.28415 0.28348 0.28289 0.28234 0.28185 0.2814 0.28099 0.28058 0.28022 0.27988 0.27955 0.27926 0.27896 0.27866 0.27836 0.27802 0.27765 0.27723 0.27675 0.27619 0.27557 0.27483 0.27401 0.2731 0.27206 0.27094 0.26969 0.26833 0.26685 0.26527 0.2636 0.26179 0.25993 0.258 0.25602 0.254 0.25193 0.24987 0.24779 0.24572 0.24368 0.24162 0.23961 0.23762 0.23566 0.23375 0.23184 0.22999 0.22816 0.22637 0.22464 0.22292 0.22127 0.21967 0.21813 0.21665 0.21523 0.21389 0.21265 0.21151 0.21048 0.20956 0.20877 0.20811 0.20756 0.20713 0.20684 0.20672 0.20681 0.20715 0.20777 0.20876 0.21005 0.21175 0.2138 0.21618 0.21891 0.22182 0.22488 0.22785 0.23071 0.23334 0.23564 0.23764 0.23921 0.24044 0.24135 0.24198 0.24245 0.2428 0.24313 0.24346 0.24382 0.24421 0.24462 0.24499 0.24534 0.24562 0.24586 0.24606 0.2463 0.24661 0.24702 0.2476 0.24828 0.24906 0.24986 0.25063 0.25133 0.25192 0.25241 0.2528 0.25312 0.25337 0.25358 0.25375 0.25388 0.254 0.25409 0.25415 0.25412 0.25397 0.25364 0.25311 0.2524 0.2515 0.25045 0.24923 0.2479 0.24647 0.245 0.24351 0.24198 0.2405 0.23904 0.23765 0.23633 0.2351 0.23397 0.23291 0.23195 0.23103 0.23012 0.22918 0.22817 0.22709 0.22591 0.22469 0.2234 0.22205 0.22078 0.21934 0.21786 0.21639 0.21493 0.2136 0.21242 0.21148 0.21077 0.21036 0.21023 0.21038 0.21087 0.21169 0.21283 0.21436 0.21626 0.21854 0.22131 0.2245 0.22819 0.23244 0.23734 0.24303 0.24957 0.25726 0.26588 0.27559 0.28635 0.29807 0.3107 0.32395 0.33799 0.35223 0.36662 0.38075 0.39437 0.40751 0.41969 0.43124 0.44186 0.45159 0.46037 0.46819 0.47513 0.4809 0.48569 0.48934 0.49187 0.49324 0.49355 0.49288 0.49123 0.48877 0.48573 0.48218 0.47829 0.47421 0.46996 0.4657 0.46135 0.45705 0.45275 0.44854 0.44438 0.44026 0.43622 0.43216 0.42819 0.42423 0.42031 0.41642 0.41251 0.40871 0.40489 0.40121 0.39756 0.39409 0.39074 0.38756 0.38461 0.38186 0.37944 0.37727 0.37545 0.37398 0.37288 0.37217 0.37181 0.37184 0.37226 0.37308 0.37429 0.37587 0.37786 0.38023 0.38293 0.38596 0.38923 0.39282 0.39653 0.40046 0.40447 0.40857 0.41277 0.41692 0.42118 0.42533 0.42945 0.43341 0.43727 0.44095 0.44447 0.4478 0.45093 0.45395 0.45675 0.45949 0.46207 0.46454 0.46686 0.46903 0.47106 0.47294 0.47473 0.47637 0.47789 0.47922 0.48046 0.48157 0.48257 0.48339 0.48411 0.48466 0.48507 0.48534 0.48545 0.48537 0.48516 0.48478 0.48427 0.48362 0.4828 0.48184 0.48068 0.47938 0.47787 0.47622 0.47443 0.47255 0.4706 0.46866 0.46669 0.46474 0.46279 0.46075 0.45867 0.45649 0.45431 0.45204 0.4498 0.44749 0.44521 0.44291 0.4406 0.43834 0.43606 0.43375 0.43141 0.42905 0.42665 0.42423 0.42179 0.41939 0.41701 0.41463 0.4123 0.41002 0.4078 0.40564 0.40355 0.40148 0.39945 0.39746 0.3955 0.39356 0.39171 0.38989 0.38814 0.38647 0.38492 0.38344 0.38216 0.38099 0.38007 0.37943 0.37906 0.37903 0.3794 0.38018 0.38143 0.38316 0.38543 0.38817 0.39149 0.39527 0.39964 0.4044 0.40965 0.41518 0.42107 0.42706 0.4332 0.43927 0.44536 0.4513 0.45724 0.46317 0.46912 0.47519 0.48127 0.48732 0.49289 0.49782 0.5016 0.50417 0.50544 0.50577 0.50543 0.50498 0.50475 0.50507 0.50602 0.50764 0.50973 0.51211 0.51444 0.51646 0.518 0.51896 0.51949 0.51963 0.51948 0.51923 0.51881 0.51819 0.51745 0.51656 0.5156 0.51463 0.5137 0.5129 0.51228 0.51174 0.51119 0.51055 0.50966 0.50851 0.50712 0.50565 0.50427 0.50317 0.50237 0.50193 0.50172 0.5017 0.50173 0.50178 0.50177 0.50171 0.50161 0.50143 0.5012 0.50094 0.50079 0.50074 0.50082 0.50118 0.50178 0.50262 0.50384 0.50535 0.50722 0.5095 0.51207 0.515 0.51816 0.5215 0.52493 0.52847 0.53205 0.5357 0.53933 0.54294 0.54653 0.55012 0.55368 0.55735 0.56106 0.56489 0.56886 0.57298 0.57715 0.58143 0.58568 0.58998 0.59406 0.59812 0.60198 0.60588 0.60957 0.61322 0.61674 0.62028 0.62364 0.62694 0.63012 0.63309 0.63608 0.63871 0.64126 0.64353 0.64556 0.64732 0.6489 0.65013 0.65109 0.65185 0.65225 0.65234 0.65228 0.65198 0.65152
-0.023631 -0.023761 -0.023869 -0.023937 -0.023948 -0.023924 -0.023837 -0.023669 -0.023393 -0.023021 -0.022513 -0.021876 -0.02102 -0.019961 -0.01866 -0.017117 -0.01531 -0.013247 -0.010903 -0.0083825 -0.0056473 -0.0027078 0.0003642 0.0035727 0.0068174 0.010122 0.013482 0.016746 0.01995 0.023116 0.026166 0.029086 0.031844 0.034469 0.037033 0.039447 0.041766 0.044076 0.046336 0.048581 0.050805 0.052962 0.055109 0.057117 0.059013 0.060754 0.062269 0.063548 0.064626 0.065419 0.065998 0.06628 0.066344 0.066117 0.065639 0.064884 0.063893 0.062654 0.061199 0.059597 0.057901 0.056102 0.054309 0.052536 0.050803 0.049169 0.047599 0.046172 0.044856 0.043642 0.042575 0.041614 0.040766 0.040038 0.039379 0.038822 0.038331 0.037893 0.037512 0.037168 0.036846 0.036549 0.036267 0.035979 0.03569 0.035387 0.035068 0.034718 0.03434 0.033943 0.033515 0.033076 0.03264 0.032194 0.031779 0.031408 0.031068 0.03079 0.030568 0.030437 0.030376 0.030404 0.030521 0.030748 0.031075 0.031516 0.032091 0.03279 0.033618 0.034591 0.035714 0.037005 0.038435 0.040014 0.041801 0.043721 0.045807 0.048036 0.050394 0.052918 0.055522 0.058201 0.061036 0.063893 0.066811 0.069731 0.072633 0.075565 0.078382 0.081098 0.083729 0.086216 0.08861 0.09087 0.093039 0.095197 0.097287 0.099388 0.10155 0.10383 0.10633 0.10904 0.11203 0.11542 0.11911 0.12325 0.12777 0.13272 0.13826 0.14411 0.15054 0.15751 0.1649 0.17279 0.18095 0.18932 0.19806 0.20675 0.21554 0.2242 0.2326 0.24094 0.24878 0.25622 0.26326 0.26966 0.27564 0.28086 0.28552 0.28962 0.29313 0.29614 0.29866 0.30081 0.30264 0.30416 0.30544 0.30654 0.30742 0.30818 0.30877 0.30923 0.30956 0.30973 0.30977 0.30964 0.30937 0.30894 0.30839 0.30772 0.30696 0.30613 0.30522 0.30425 0.30323 0.30217 0.30107 0.29988 0.2987 0.29745 0.29614 0.29493 0.2936 0.29227 0.29094 0.28958 0.28827 0.28696 0.2857 0.28446 0.28324 0.28208 0.281 0.27996 0.27894 0.27804 0.27723 0.27653 0.27586 0.27525 0.27469 0.2742 0.27373 0.27331 0.2729 0.27253 0.27221 0.27189 0.27157 0.27127 0.27097 0.27066 0.27034 0.26997 0.26955 0.26907 0.26851 0.26788 0.26715 0.26634 0.26541 0.2644 0.26328 0.26202 0.26067 0.25919 0.25761 0.25595 0.25415 0.25229 0.25036 0.24839 0.24638 0.24431 0.24228 0.2402 0.23815 0.23612 0.23407 0.23208 0.2301 0.22816 0.22626 0.22436 0.22253 0.22072 0.21895 0.21723 0.21554 0.21391 0.21234 0.21081 0.20935 0.20796 0.20665 0.20544 0.20432 0.20333 0.20244 0.20168 0.20106 0.20054 0.20015 0.19991 0.19981 0.19993 0.20031 0.20095 0.20195 0.20328 0.20499 0.20707 0.20948 0.21225 0.21519 0.21826 0.22127 0.22416 0.22686 0.22921 0.23128 0.23291 0.23422 0.2352 0.23589 0.23641 0.23681 0.23717 0.23754 0.23792 0.23833 0.23873 0.2391 0.23942 0.23967 0.23986 0.24001 0.24016 0.2404 0.24074 0.24126 0.24189 0.24264 0.24342 0.24418 0.24488 0.24547 0.24597 0.24637 0.24669 0.24694 0.24714 0.24728 0.24738 0.24745 0.2475 0.24752 0.24744 0.24725 0.2469 0.24636 0.24564 0.24473 0.24367 0.24245 0.24112 0.2397 0.23822 0.23675 0.23522 0.23374 0.2323 0.23092 0.2296 0.22837 0.22724 0.22619 0.22522 0.22429 0.22337 0.22243 0.22141 0.22032 0.21914 0.21792 0.21663 0.21527 0.214 0.21257 0.21111 0.20963 0.20819 0.20688 0.20571 0.20476 0.20405 0.20365 0.20352 0.20367 0.20416 0.20495 0.20607 0.20757 0.20945 0.21169 0.21442 0.21758 0.22123 0.22545 0.23033 0.23599 0.2425 0.25017 0.25877 0.26849 0.2792 0.29092 0.30355 0.31686 0.33093 0.3452 0.35966 0.37387 0.38756 0.40079 0.41307 0.42469 0.43537 0.44521 0.45407 0.46194 0.46893 0.47477 0.47962 0.4833 0.48587 0.48726 0.48759 0.4869 0.48524 0.48278 0.47971 0.47613 0.47223 0.46812 0.46384 0.45955 0.45517 0.45085 0.44654 0.44228 0.43812 0.43395 0.42989 0.42583 0.42185 0.41786 0.41394 0.41001 0.40611 0.4023 0.39847 0.39477 0.39112 0.38762 0.38426 0.38108 0.37811 0.37536 0.37293 0.37077 0.36894 0.36745 0.36635 0.36565 0.3653 0.36533 0.36577 0.3666 0.36781 0.36943 0.37143 0.37381 0.37653 0.37959 0.38289 0.38651 0.39027 0.39421 0.39827 0.40242 0.40667 0.41088 0.41517 0.41935 0.42354 0.42751 0.43142 0.43511 0.43866 0.44202 0.44516 0.4482 0.45099 0.45373 0.45631 0.45876 0.46108 0.46325 0.46532 0.46723 0.46899 0.47064 0.47214 0.47349 0.47474 0.47584 0.47682 0.47767 0.47835 0.47892 0.47933 0.4796 0.47969 0.47964 0.47944 0.47909 0.47856 0.4779 0.47707 0.4761 0.47493 0.47364 0.47211 0.47045 0.46865 0.46678 0.46482 0.46289 0.46094 0.459 0.45701 0.45496 0.45289 0.45071 0.44852 0.44625 0.44398 0.44168 0.43938 0.43708 0.4348 0.43252 0.43025 0.42796 0.42561 0.42328 0.42088 0.41842 0.41597 0.41355 0.41114 0.40875 0.40641 0.4041 0.40188 0.39971 0.39759 0.39549 0.39346 0.39145 0.38949 0.38752 0.38566 0.38383 0.38208 0.3804 0.37883 0.37736 0.37608 0.37491 0.374 0.37334 0.37298 0.37296 0.37336 0.37414 0.3754 0.37717 0.37944 0.38221 0.38555 0.38938 0.39381 0.39862 0.40388 0.40947 0.41541 0.42147 0.42764 0.43378 0.43991 0.44592 0.45193 0.45794 0.46396 0.47007 0.4762 0.48228 0.48791 0.49286 0.4967 0.49931 0.50062 0.50094 0.50064 0.50023 0.50006 0.5004 0.50137 0.50304 0.50514 0.50756 0.50991 0.51194 0.51342 0.51433 0.51476 0.51483 0.51467 0.51437 0.51391 0.51328 0.51252 0.51159 0.51064 0.50968 0.50876 0.508 0.50735 0.50682 0.5063 0.5057 0.50486 0.50368 0.50228 0.50072 0.49931 0.49815 0.49734 0.49687 0.49665 0.49661 0.49661 0.49663 0.49663 0.49656 0.49648 0.49629 0.496 0.49576 0.49559 0.49554 0.49563 0.49596 0.49652 0.49735 0.49851 0.50004 0.50194 0.50418 0.50676 0.50968 0.51285 0.51619 0.51964 0.52317 0.52675 0.53039 0.53399 0.53767 0.54119 0.54478 0.54844 0.5521 0.55584 0.55971 0.56367 0.5678 0.572 0.57634 0.58061 0.58493 0.58908 0.59314 0.59699 0.60084 0.60458 0.60824 0.61185 0.61538 0.61882 0.62208 0.62529 0.62835 0.63128 0.63405 0.63657 0.63886 0.64085 0.64261 0.64419 0.64537 0.64635 0.64712 0.64753 0.64757 0.64749 0.64715 0.64669
-0.015174 -0.015314 -0.015437 -0.015511 -0.015513 -0.015473 -0.015363 -0.015152 -0.014821 -0.014381 -0.013747 -0.012961 -0.011927 -0.010644 -0.009055 -0.0071602 -0.0049576 -0.0024536 0.0004128 0.0034836 0.0068063 0.010389 0.014126 0.018024 0.021961 0.025968 0.030042 0.033992 0.037859 0.041675 0.045343 0.04884 0.052144 0.055273 0.058316 0.061173 0.063925 0.066653 0.069323 0.071987 0.074622 0.077197 0.079752 0.082146 0.084401 0.086475 0.088282 0.089815 0.091101 0.092049 0.092739 0.093087 0.093164 0.092907 0.09234 0.091435 0.090243 0.088752 0.086995 0.085057 0.083 0.080813 0.078639 0.076473 0.07437 0.072387 0.070481 0.068738 0.067139 0.06566 0.064355 0.063186 0.062147 0.061251 0.060439 0.05975 0.059138 0.058593 0.058115 0.057682 0.057278 0.056905 0.056546 0.056188 0.055828 0.055447 0.055054 0.054619 0.054154 0.053669 0.05315 0.05262 0.052086 0.051558 0.051064 0.050619 0.050217 0.049889 0.049629 0.049475 0.049405 0.049449 0.049596 0.049877 0.050278 0.050814 0.051513 0.052356 0.053361 0.054542 0.055894 0.057449 0.059174 0.061083 0.063236 0.065538 0.068038 0.070709 0.073537 0.076551 0.079654 0.082846 0.08621 0.089586 0.093034 0.096486 0.099901 0.10336 0.10667 0.10986 0.11298 0.11592 0.11875 0.12145 0.12404 0.12662 0.12911 0.13163 0.13423 0.13696 0.13995 0.14321 0.14676 0.1508 0.1552 0.16015 0.16554 0.17141 0.17795 0.1849 0.19242 0.2005 0.20906 0.21817 0.22753 0.2371 0.24703 0.25685 0.26671 0.27638 0.28575 0.29494 0.30358 0.31173 0.3194 0.32635 0.3328 0.33841 0.34341 0.3478 0.35156 0.35478 0.3575 0.35979 0.36173 0.36335 0.3647 0.36585 0.36678 0.36756 0.36817 0.36863 0.36894 0.36909 0.36908 0.36889 0.36855 0.36803 0.36739 0.36662 0.36575 0.36482 0.3638 0.36274 0.3616 0.36043 0.35917 0.35781 0.35649 0.35513 0.35369 0.35234 0.35085 0.34937 0.3479 0.34639 0.34492 0.34345 0.34203 0.34066 0.3393 0.33802 0.33681 0.33566 0.33453 0.33354 0.33264 0.33186 0.33113 0.33045 0.32982 0.32927 0.32875 0.32828 0.32782 0.32739 0.32701 0.32664 0.32627 0.32594 0.32558 0.32523 0.32484 0.32442 0.32394 0.32341 0.32279 0.3221 0.32129 0.32039 0.31936 0.31823 0.31701 0.31562 0.31415 0.31254 0.31081 0.30899 0.30702 0.305 0.30289 0.30073 0.29854 0.29628 0.29405 0.29178 0.28952 0.28729 0.28505 0.28287 0.28069 0.27855 0.27645 0.27436 0.27234 0.27034 0.26838 0.26649 0.26461 0.26281 0.26108 0.2594 0.2578 0.25627 0.25484 0.2535 0.25229 0.2512 0.25026 0.24946 0.2488 0.24827 0.24787 0.24762 0.24753 0.24769 0.24813 0.24889 0.25006 0.25158 0.25355 0.25594 0.25869 0.26187 0.26525 0.26881 0.27229 0.27565 0.27881 0.28163 0.28415 0.28618 0.28783 0.28911 0.29003 0.29076 0.29132 0.29182 0.29229 0.29277 0.29326 0.29372 0.29413 0.29447 0.2947 0.29479 0.29482 0.29485 0.29496 0.29523 0.2957 0.29634 0.29713 0.29801 0.29889 0.2997 0.30043 0.30106 0.30158 0.302 0.30233 0.30254 0.30269 0.30276 0.30278 0.30277 0.30273 0.30258 0.30233 0.3019 0.30127 0.30045 0.29944 0.29828 0.29693 0.29546 0.29391 0.29229 0.29065 0.28897 0.28733 0.28571 0.28417 0.2827 0.28133 0.28008 0.27889 0.27779 0.27674 0.27569 0.27461 0.27346 0.27223 0.27091 0.26953 0.26809 0.26657 0.26513 0.26352 0.26189 0.26026 0.25867 0.25722 0.25594 0.25492 0.25415 0.25371 0.25358 0.25377 0.25433 0.25524 0.25653 0.25821 0.26033 0.26288 0.26598 0.26955 0.27374 0.27853 0.2841 0.29053 0.29788 0.30648 0.31607 0.3269 0.33879 0.35166 0.36547 0.37991 0.39509 0.41042 0.42586 0.44094 0.45542 0.46931 0.48212 0.49423 0.50527 0.51536 0.52442 0.53245 0.53956 0.54546 0.55029 0.55397 0.55644 0.55782 0.55811 0.55739 0.55567 0.55313 0.54997 0.54634 0.54234 0.53814 0.53375 0.52934 0.52486 0.52038 0.51591 0.51154 0.50722 0.5029 0.49869 0.49445 0.49033 0.48617 0.48207 0.47799 0.47389 0.46989 0.46586 0.46199 0.45815 0.45446 0.45089 0.44754 0.44441 0.44149 0.4389 0.43661 0.43466 0.43306 0.43185 0.43104 0.43063 0.4306 0.43099 0.43179 0.43303 0.43469 0.43675 0.4392 0.44201 0.44517 0.44858 0.45232 0.4562 0.46027 0.46448 0.46875 0.4731 0.47746 0.48187 0.48614 0.4904 0.49447 0.49845 0.50222 0.5058 0.50918 0.51236 0.51538 0.51819 0.52094 0.52349 0.52593 0.52821 0.53034 0.53239 0.53426 0.53601 0.53764 0.53912 0.54046 0.54168 0.54275 0.54372 0.54456 0.54524 0.5458 0.54623 0.54652 0.5466 0.54652 0.54632 0.54597 0.54544 0.54479 0.54393 0.54293 0.54173 0.54037 0.5388 0.53707 0.5352 0.53327 0.53134 0.52934 0.52738 0.52546 0.5235 0.52146 0.51937 0.51716 0.51489 0.51256 0.51025 0.50788 0.50552 0.50318 0.50088 0.49856 0.49622 0.49388 0.49149 0.48908 0.48659 0.48412 0.48158 0.47911 0.47659 0.47412 0.4717 0.46934 0.46704 0.46479 0.4626 0.46043 0.45833 0.45622 0.45423 0.45219 0.45024 0.44834 0.44652 0.4448 0.44319 0.4417 0.44038 0.43921 0.43828 0.43765 0.43733 0.43741 0.43793 0.43889 0.44032 0.44223 0.44478 0.4478 0.45143 0.45555 0.46025 0.46537 0.47094 0.47682 0.48308 0.48939 0.49579 0.50216 0.50856 0.51483 0.52106 0.52725 0.53349 0.53982 0.54609 0.55228 0.55802 0.56312 0.56712 0.56991 0.57149 0.5721 0.57208 0.57204 0.57223 0.57296 0.57431 0.57635 0.5788 0.58145 0.58391 0.58595 0.58724 0.58789 0.58798 0.58773 0.58731 0.58683 0.58624 0.58558 0.58483 0.58403 0.58316 0.58232 0.58156 0.58103 0.58063 0.58038 0.58012 0.57975 0.57903 0.57788 0.57637 0.5747 0.57307 0.57177 0.57082 0.57026 0.56998 0.5699 0.56992 0.56997 0.56999 0.56995 0.56985 0.56966 0.56942 0.5692 0.56902 0.569 0.56908 0.56939 0.56996 0.57082 0.57201 0.57353 0.57541 0.57762 0.58022 0.58307 0.58617 0.58942 0.59277 0.59633 0.59987 0.60342 0.60696 0.61057 0.6141 0.6177 0.62127 0.62481 0.62847 0.63227 0.63619 0.64029 0.64441 0.64863 0.65289 0.6571 0.66124 0.66533 0.66918 0.67307 0.6768 0.68036 0.68397 0.68744 0.69073 0.69403 0.6972 0.7003 0.70318 0.70589 0.70837 0.71062 0.7126 0.71438 0.71589 0.71709 0.71799 0.71865 0.71901 0.71914 0.71901 0.71863 0.71811
-0.015738 -0.015869 -0.01598 -0.016044 -0.016044 -0.016005 -0.015885 -0.015686 -0.015361 -0.014914 -0.014289 -0.013519 -0.012489 -0.011216 -0.0096395 -0.0077608 -0.0055771 -0.0030842 -0.0002363 0.0028171 0.0061219 0.0096862 0.013406 0.017296 0.021222 0.025214 0.029273 0.033217 0.037078 0.040893 0.044546 0.048036 0.051336 0.054457 0.057495 0.060344 0.063093 0.06582 0.068481 0.071128 0.073759 0.076317 0.078865 0.081253 0.083505 0.085571 0.087375 0.088902 0.090185 0.091141 0.091838 0.09219 0.092271 0.092014 0.091454 0.090563 0.089382 0.087905 0.086159 0.084239 0.082198 0.080028 0.077867 0.075728 0.073635 0.071662 0.069767 0.068042 0.066451 0.064985 0.063686 0.062519 0.061483 0.060587 0.059781 0.059094 0.058486 0.057939 0.057464 0.057032 0.056632 0.056252 0.055894 0.055537 0.055172 0.05479 0.054405 0.053966 0.053503 0.053012 0.052488 0.05196 0.051428 0.050896 0.050407 0.049956 0.049553 0.049226 0.048967 0.048816 0.048744 0.048791 0.04894 0.049221 0.049628 0.050175 0.050873 0.051718 0.052727 0.053917 0.055275 0.056838 0.058566 0.060481 0.062648 0.064958 0.067476 0.070162 0.073003 0.076028 0.079152 0.082354 0.085744 0.089133 0.092594 0.096066 0.099492 0.10295 0.10627 0.10948 0.11262 0.11558 0.11844 0.12116 0.12378 0.12639 0.12892 0.13145 0.13408 0.13683 0.13984 0.14312 0.14672 0.15081 0.15526 0.16028 0.16575 0.17171 0.17835 0.1854 0.19306 0.20131 0.21002 0.21931 0.22884 0.23861 0.24875 0.25877 0.26885 0.27874 0.28832 0.29773 0.30657 0.31489 0.32274 0.32984 0.33642 0.34215 0.34727 0.35176 0.3556 0.35889 0.36167 0.36402 0.36601 0.36767 0.36905 0.37022 0.37117 0.37196 0.37257 0.37303 0.37334 0.37348 0.37346 0.37325 0.3729 0.37236 0.37169 0.3709 0.37001 0.36904 0.36797 0.36684 0.36566 0.3644 0.36305 0.36166 0.36027 0.35885 0.35736 0.35595 0.35439 0.35289 0.35136 0.34982 0.3483 0.34681 0.34535 0.34394 0.34255 0.34125 0.34001 0.33884 0.33769 0.33668 0.33576 0.33495 0.33421 0.33354 0.3329 0.33234 0.33181 0.33132 0.33085 0.33042 0.33002 0.32963 0.32926 0.32891 0.32854 0.32817 0.32776 0.32732 0.32684 0.32628 0.32565 0.32494 0.3241 0.32318 0.32213 0.32098 0.31973 0.31831 0.31681 0.31516 0.3134 0.31153 0.30954 0.30747 0.30531 0.30311 0.30087 0.29857 0.29628 0.29398 0.29169 0.28941 0.28711 0.28489 0.28267 0.28049 0.27836 0.27623 0.27418 0.27214 0.27015 0.26823 0.26633 0.2645 0.26273 0.26104 0.25942 0.25786 0.2564 0.25507 0.25385 0.25277 0.25183 0.25103 0.25039 0.24987 0.24949 0.24926 0.2492 0.24937 0.24983 0.25059 0.25178 0.25332 0.25531 0.25769 0.26046 0.26363 0.26701 0.27057 0.27406 0.27742 0.28058 0.2834 0.2859 0.28793 0.28957 0.29085 0.29176 0.2925 0.29308 0.29361 0.29411 0.29463 0.29514 0.29562 0.29603 0.29636 0.29657 0.29668 0.29672 0.29676 0.29689 0.29716 0.29765 0.29831 0.29912 0.3 0.30087 0.30169 0.30242 0.30304 0.30356 0.30399 0.30432 0.30456 0.30474 0.30484 0.30488 0.3049 0.30488 0.30477 0.30454 0.30411 0.3035 0.30269 0.30169 0.30052 0.29917 0.2977 0.29613 0.2945 0.29284 0.29115 0.28949 0.28786 0.2863 0.28484 0.28345 0.28217 0.28096 0.27985 0.27878 0.27771 0.27661 0.27543 0.27419 0.27285 0.27146 0.26999 0.26845 0.26698 0.26535 0.2637 0.26205 0.26043 0.25897 0.25769 0.25666 0.2559 0.25547 0.25535 0.25556 0.25614 0.25708 0.25839 0.2601 0.26226 0.26484 0.26801 0.27167 0.27595 0.28092 0.28666 0.29329 0.30084 0.30969 0.31956 0.33065 0.3429 0.35613 0.37035 0.38524 0.40088 0.41666 0.43259 0.44813 0.46307 0.47741 0.49059 0.50306 0.51441 0.52476 0.53408 0.54231 0.54959 0.55561 0.56055 0.56431 0.56684 0.5682 0.56846 0.56768 0.56586 0.56325 0.56002 0.55626 0.55215 0.54781 0.54328 0.53874 0.53407 0.52948 0.52487 0.52035 0.51589 0.51143 0.50709 0.5027 0.49841 0.49412 0.48988 0.48566 0.48144 0.47731 0.47315 0.46914 0.46517 0.46135 0.45771 0.45422 0.45099 0.44797 0.44528 0.44288 0.44085 0.43918 0.43793 0.43709 0.43665 0.4366 0.43701 0.43783 0.43909 0.44078 0.4429 0.4454 0.44826 0.4515 0.45501 0.45882 0.4628 0.46697 0.47123 0.47561 0.48006 0.48452 0.489 0.49337 0.49775 0.50193 0.50597 0.50983 0.51346 0.51693 0.52021 0.52332 0.52621 0.52901 0.53163 0.53414 0.53649 0.53869 0.54076 0.54269 0.54448 0.54617 0.54765 0.54901 0.55028 0.5514 0.55243 0.55326 0.55398 0.55456 0.55498 0.55525 0.55534 0.5553 0.5551 0.55473 0.5542 0.55351 0.55264 0.55163 0.55041 0.549 0.54738 0.54558 0.54365 0.54169 0.53968 0.53764 0.53564 0.53364 0.53162 0.52954 0.52738 0.5251 0.52279 0.52039 0.51803 0.5156 0.51321 0.51079 0.50841 0.506 0.5036 0.50119 0.49873 0.49628 0.49378 0.49121 0.48862 0.48608 0.48353 0.48104 0.4786 0.47619 0.47386 0.47161 0.46941 0.46723 0.46512 0.463 0.46096 0.45891 0.45697 0.45507 0.45321 0.45143 0.44982 0.44831 0.44697 0.4458 0.44488 0.44428 0.44398 0.44411 0.44468 0.4457 0.44723 0.44929 0.45192 0.45507 0.45885 0.46312 0.46797 0.47321 0.47895 0.48496 0.49126 0.49767 0.50418 0.5106 0.51705 0.52336 0.52959 0.53586 0.54213 0.54847 0.5548 0.56101 0.56685 0.57195 0.57596 0.57876 0.58024 0.58082 0.58081 0.58066 0.58085 0.58158 0.5829 0.5849 0.58737 0.59004 0.59252 0.5946 0.59603 0.59679 0.59703 0.59692 0.59655 0.59616 0.59563 0.59503 0.59431 0.59349 0.59263 0.59178 0.59097 0.59034 0.58996 0.58966 0.58937 0.58893 0.58818 0.58697 0.58551 0.58385 0.58226 0.58097 0.58003 0.5795 0.57921 0.57919 0.57916 0.57921 0.57921 0.57918 0.57905 0.57885 0.57861 0.57837 0.57823 0.57817 0.57832 0.5787 0.57927 0.58012 0.58131 0.58288 0.5848 0.58706 0.5897 0.59262 0.59576 0.59915 0.60267 0.60623 0.60984 0.61356 0.61725 0.62094 0.62458 0.62815 0.63182 0.63549 0.63937 0.64334 0.64735 0.65161 0.65586 0.66026 0.66456 0.66903 0.67326 0.67749 0.68147 0.68545 0.68929 0.69307 0.69673 0.70029 0.70384 0.70724 0.71043 0.71357 0.71656 0.71943 0.72201 0.72433 0.72645 0.72826 0.72982 0.73116 0.73222 0.73292 0.73335 0.73355 0.73333 0.733 0.7325
-0.012641 -0.012772 -0.012884 -0.012944 -0.012941 -0.012906 -0.012799 -0.012598 -0.012283 -0.011851 -0.011238 -0.010469 -0.0094628 -0.0082008 -0.0066465 -0.0047881 -0.0026244 -0.0001592 0.0026477 0.0056662 0.0089389 0.012445 0.016104 0.019915 0.023764 0.027679 0.031662 0.035523 0.039314 0.04306 0.046652 0.050095 0.053353 0.056447 0.059453 0.062284 0.065015 0.067719 0.070365 0.072997 0.075602 0.078142 0.080654 0.083011 0.085225 0.087245 0.089008 0.090496 0.091739 0.092659 0.093329 0.093656 0.093715 0.093447 0.092878 0.091987 0.090802 0.089334 0.087596 0.085695 0.083669 0.081528 0.079388 0.077273 0.075208 0.073265 0.071395 0.069693 0.068127 0.06668 0.065401 0.06425 0.063226 0.062344 0.061548 0.060868 0.060273 0.059739 0.059268 0.058843 0.058451 0.058081 0.057739 0.057383 0.057035 0.056666 0.05628 0.05586 0.05541 0.054931 0.054416 0.053893 0.053363 0.052839 0.052342 0.051898 0.051498 0.051167 0.050905 0.050746 0.05067 0.050702 0.05084 0.051111 0.051496 0.052017 0.052696 0.053511 0.054487 0.055636 0.056961 0.058477 0.060155 0.062011 0.064115 0.066359 0.068805 0.071416 0.074178 0.077121 0.080159 0.08328 0.086566 0.089867 0.093226 0.096599 0.099928 0.10329 0.10652 0.10964 0.11267 0.11555 0.11832 0.12095 0.12349 0.12602 0.12847 0.13093 0.13344 0.1361 0.13899 0.14214 0.14558 0.14951 0.15376 0.15857 0.1638 0.16951 0.17585 0.18261 0.18994 0.19784 0.20619 0.2151 0.22427 0.23366 0.24344 0.25312 0.26287 0.27245 0.28174 0.29089 0.2995 0.30762 0.31527 0.32223 0.3287 0.33433 0.33935 0.34377 0.34757 0.35083 0.35358 0.35591 0.3579 0.35957 0.36095 0.36213 0.36307 0.36388 0.36451 0.365 0.36533 0.3655 0.36551 0.36533 0.36502 0.36454 0.36394 0.36321 0.36238 0.36149 0.36052 0.3595 0.35841 0.35726 0.35606 0.35475 0.35343 0.35209 0.35069 0.34935 0.34786 0.34641 0.34495 0.34346 0.342 0.34053 0.33912 0.33775 0.3364 0.33511 0.33391 0.33275 0.33163 0.33065 0.32977 0.32898 0.32824 0.32757 0.32694 0.32639 0.32587 0.32539 0.32492 0.3245 0.32412 0.32375 0.32339 0.32305 0.32269 0.32234 0.32197 0.32155 0.32108 0.32054 0.31993 0.31924 0.31842 0.31752 0.3165 0.31538 0.31416 0.31277 0.31129 0.30968 0.30795 0.30613 0.30416 0.30215 0.30004 0.29789 0.2957 0.29345 0.2912 0.28895 0.2867 0.28449 0.28225 0.28006 0.2779 0.27576 0.27369 0.27161 0.26959 0.26761 0.26566 0.26378 0.26192 0.26012 0.25839 0.25674 0.25514 0.25361 0.25217 0.25085 0.24964 0.24856 0.24761 0.24682 0.24616 0.24563 0.24525 0.24502 0.24495 0.24513 0.2456 0.24637 0.24756 0.2491 0.25109 0.25348 0.25624 0.25941 0.26277 0.2663 0.26975 0.27307 0.27619 0.27895 0.2814 0.28341 0.28502 0.28628 0.2872 0.28792 0.28849 0.289 0.2895 0.29 0.29051 0.291 0.29142 0.29177 0.292 0.2921 0.29211 0.29213 0.29222 0.29245 0.2929 0.29353 0.2943 0.29514 0.29599 0.29678 0.29747 0.29806 0.29856 0.29893 0.29922 0.29941 0.29954 0.29957 0.29955 0.2995 0.29944 0.29929 0.29901 0.29857 0.29793 0.2971 0.29608 0.29492 0.29358 0.29212 0.29057 0.28895 0.28731 0.28563 0.28399 0.28238 0.28084 0.27938 0.27801 0.27674 0.27554 0.27444 0.27338 0.27232 0.27124 0.27007 0.26885 0.26753 0.26615 0.26471 0.2632 0.26175 0.26016 0.25852 0.25689 0.25532 0.25389 0.25262 0.2516 0.25084 0.25039 0.25025 0.25043 0.25097 0.25187 0.25308 0.25471 0.25674 0.25919 0.2622 0.2657 0.26982 0.27457 0.28004 0.2864 0.29365 0.30215 0.31163 0.32233 0.3341 0.34687 0.3606 0.37498 0.39011 0.40541 0.4209 0.43601 0.4506 0.46463 0.47761 0.48988 0.50107 0.51136 0.52057 0.52878 0.53605 0.5421 0.54709 0.55095 0.5536 0.55504 0.5554 0.55475 0.55305 0.55055 0.54745 0.54381 0.53981 0.53561 0.53119 0.52677 0.52223 0.51777 0.51327 0.50889 0.50454 0.50024 0.49603 0.49181 0.48765 0.4835 0.47938 0.4753 0.4712 0.46718 0.46314 0.45923 0.45535 0.45162 0.44805 0.44465 0.44149 0.43855 0.43596 0.43363 0.43165 0.43003 0.42883 0.42803 0.42761 0.4276 0.42805 0.42888 0.43014 0.43181 0.43394 0.43648 0.43934 0.44257 0.44608 0.44989 0.45386 0.45804 0.46235 0.4667 0.47117 0.47564 0.48014 0.48449 0.48886 0.49298 0.49703 0.50084 0.50445 0.50784 0.51103 0.51406 0.51688 0.51961 0.52214 0.52455 0.52685 0.52901 0.53101 0.53289 0.53463 0.53627 0.53778 0.53909 0.54037 0.54146 0.54245 0.54332 0.54404 0.5446 0.54502 0.54529 0.54539 0.54536 0.54515 0.54481 0.54426 0.54359 0.54276 0.54176 0.54058 0.53922 0.53766 0.53595 0.5341 0.5322 0.53026 0.52833 0.52638 0.5245 0.52258 0.52056 0.51851 0.5163 0.5141 0.51177 0.50947 0.50717 0.50486 0.50254 0.50023 0.49793 0.49562 0.49328 0.4909 0.4885 0.48599 0.4835 0.48095 0.47845 0.47594 0.47346 0.471 0.46859 0.46624 0.46395 0.46172 0.45952 0.4574 0.45524 0.45317 0.45109 0.44909 0.44715 0.44528 0.44349 0.4418 0.44024 0.43888 0.43767 0.43669 0.436 0.43567 0.43569 0.43616 0.43708 0.43853 0.44045 0.44296 0.44599 0.44966 0.45381 0.45859 0.4638 0.46948 0.4755 0.48184 0.48829 0.4949 0.50147 0.50801 0.51441 0.52077 0.5271 0.53341 0.53985 0.54621 0.5525 0.55834 0.5635 0.56757 0.57047 0.57202 0.57268 0.57273 0.57272 0.57295 0.57377 0.57527 0.57741 0.57994 0.58268 0.58519 0.5872 0.58848 0.58901 0.58898 0.58857 0.588 0.58748 0.58685 0.58614 0.58536 0.58445 0.58356 0.58271 0.58199 0.58149 0.58116 0.58102 0.58086 0.58051 0.5798 0.57867 0.57707 0.57529 0.5736 0.5722 0.57116 0.57055 0.57022 0.57012 0.57009 0.57011 0.57009 0.57 0.56987 0.5697 0.56944 0.56917 0.56903 0.56896 0.56907 0.56936 0.56994 0.5708 0.572 0.57353 0.57543 0.57766 0.58021 0.58312 0.58622 0.58953 0.59298 0.59647 0.60005 0.60368 0.60725 0.61095 0.61449 0.61809 0.62174 0.62536 0.62897 0.63289 0.63689 0.6411 0.64531 0.64962 0.65389 0.65829 0.66235 0.66653 0.67053 0.67449 0.67825 0.682 0.68557 0.68914 0.69248 0.69589 0.69913 0.70216 0.70515 0.70781 0.71041 0.71268 0.71472 0.71647 0.71792 0.71913 0.72007 0.72072 0.72111 0.7212 0.72106 0.72066 0.72008
-0.013703 -0.013819 -0.013929 -0.013992 -0.013981 -0.013952 -0.013834 -0.013634 -0.013308 -0.012879 -0.012257 -0.01148 -0.010461 -0.0091864 -0.0075978 -0.0057182 -0.0035311 -0.0010331 0.0018133 0.004875 0.0081885 0.01175 0.015459 0.019343 0.023266 0.027256 0.031326 0.035272 0.039144 0.042978 0.046657 0.050185 0.053514 0.056663 0.05973 0.062607 0.065375 0.06813 0.070823 0.073509 0.076174 0.078772 0.08135 0.083769 0.086045 0.088124 0.089938 0.091472 0.09276 0.093714 0.094405 0.09476 0.094838 0.094572 0.093995 0.093084 0.091864 0.090338 0.088536 0.086546 0.084426 0.082177 0.079934 0.077717 0.075557 0.073523 0.071577 0.069804 0.068174 0.066666 0.065338 0.064144 0.063081 0.062164 0.061337 0.060636 0.060012 0.059454 0.058972 0.05853 0.05812 0.057748 0.057389 0.057035 0.056677 0.056302 0.055917 0.055488 0.055034 0.054548 0.05403 0.0535 0.052965 0.052435 0.051934 0.051487 0.051083 0.050748 0.050486 0.050328 0.050253 0.050293 0.050436 0.050712 0.05111 0.051641 0.052331 0.053168 0.054167 0.055338 0.056683 0.058226 0.059941 0.061835 0.063979 0.066271 0.068758 0.071422 0.074236 0.077241 0.080333 0.083515 0.086874 0.090239 0.093683 0.097126 0.10053 0.10398 0.10729 0.11049 0.11361 0.11658 0.11946 0.12219 0.12482 0.12745 0.12999 0.13255 0.13517 0.13793 0.14093 0.1442 0.14778 0.15182 0.15627 0.16123 0.16663 0.17249 0.17901 0.18595 0.19348 0.20156 0.21014 0.2193 0.22869 0.23832 0.24831 0.25821 0.26815 0.2779 0.28736 0.29667 0.30542 0.31366 0.32143 0.32849 0.33505 0.34075 0.34585 0.35036 0.3542 0.3575 0.36029 0.36264 0.36468 0.36636 0.36776 0.36896 0.36993 0.37075 0.3714 0.37189 0.37223 0.3724 0.37242 0.37226 0.37196 0.37147 0.37088 0.37015 0.36934 0.36844 0.36745 0.36642 0.36532 0.36416 0.3629 0.3616 0.36029 0.35891 0.35748 0.35611 0.35463 0.35316 0.35169 0.3502 0.34873 0.34729 0.34585 0.34446 0.3431 0.34182 0.3406 0.33943 0.3383 0.3373 0.33639 0.33558 0.33487 0.33417 0.33353 0.33296 0.33241 0.33192 0.33143 0.33099 0.33059 0.3302 0.32982 0.32947 0.32911 0.32876 0.32837 0.32796 0.32748 0.32694 0.32631 0.32561 0.32479 0.32388 0.32285 0.32171 0.32047 0.31907 0.31757 0.31595 0.31422 0.31237 0.31038 0.30833 0.3062 0.30402 0.3018 0.29953 0.29727 0.29499 0.29271 0.29047 0.2882 0.28598 0.28379 0.28164 0.27954 0.27743 0.2754 0.27339 0.27142 0.26952 0.26763 0.26583 0.26407 0.26239 0.26079 0.25925 0.25781 0.25649 0.25528 0.25421 0.25327 0.2525 0.25187 0.25137 0.25101 0.2508 0.25078 0.25099 0.2515 0.25232 0.25359 0.25521 0.2573 0.2598 0.26269 0.26602 0.26954 0.27323 0.27682 0.2803 0.28356 0.28647 0.28907 0.29119 0.29291 0.29428 0.29527 0.29606 0.29668 0.29724 0.29777 0.2983 0.29884 0.29935 0.29977 0.30011 0.30031 0.30036 0.30032 0.30026 0.30029 0.30046 0.30086 0.30144 0.3022 0.30304 0.30389 0.30471 0.30543 0.30605 0.30656 0.30695 0.30726 0.30743 0.3075 0.30749 0.30743 0.30732 0.3072 0.30698 0.30667 0.30617 0.30549 0.30463 0.30358 0.30237 0.30099 0.2995 0.29791 0.29625 0.29458 0.29287 0.29119 0.28954 0.28796 0.28647 0.28507 0.28376 0.28255 0.28143 0.28034 0.27925 0.27813 0.27694 0.27567 0.27433 0.27292 0.27145 0.26991 0.26844 0.2668 0.26515 0.26351 0.26191 0.26045 0.25917 0.25815 0.25738 0.25693 0.2568 0.25698 0.25752 0.25843 0.2597 0.26137 0.26346 0.26595 0.26905 0.27261 0.27683 0.28172 0.28738 0.29389 0.30133 0.31001 0.31971 0.33058 0.34258 0.35554 0.36947 0.384 0.3993 0.41474 0.43032 0.44556 0.46021 0.47429 0.48729 0.4996 0.51082 0.52108 0.53034 0.53853 0.54581 0.55187 0.55689 0.56073 0.56339 0.56486 0.56523 0.56459 0.56297 0.56052 0.55747 0.55385 0.5499 0.54574 0.54139 0.53699 0.53251 0.52807 0.52361 0.51926 0.51496 0.51066 0.50648 0.50227 0.49815 0.49405 0.48997 0.48589 0.48181 0.47781 0.47376 0.46986 0.46598 0.46224 0.45865 0.45528 0.4521 0.44913 0.4465 0.44415 0.44216 0.44052 0.43928 0.43845 0.43804 0.43798 0.43839 0.4392 0.44044 0.4421 0.44419 0.44668 0.44951 0.45271 0.4562 0.46001 0.46395 0.46809 0.47237 0.47674 0.4812 0.48564 0.4901 0.49445 0.4988 0.50292 0.50695 0.51069 0.51425 0.5176 0.52074 0.52372 0.52647 0.52917 0.53164 0.534 0.53625 0.53833 0.54031 0.54215 0.54387 0.54549 0.54691 0.54824 0.54947 0.55057 0.55155 0.55239 0.5531 0.55366 0.55409 0.55437 0.55448 0.55446 0.55426 0.5539 0.5534 0.55277 0.55193 0.55097 0.54979 0.54844 0.54691 0.54522 0.5434 0.54152 0.53965 0.53778 0.53587 0.534 0.53212 0.53018 0.52819 0.52604 0.52386 0.52158 0.51931 0.51704 0.51476 0.51246 0.5102 0.50794 0.50567 0.50334 0.50096 0.49857 0.49612 0.49364 0.49112 0.48862 0.48611 0.48363 0.4812 0.47882 0.47649 0.47419 0.47195 0.46973 0.46758 0.46544 0.46334 0.46126 0.45925 0.45728 0.4554 0.45361 0.4519 0.45034 0.44897 0.44773 0.44679 0.44613 0.44575 0.44582 0.44628 0.44721 0.44865 0.45057 0.45311 0.45616 0.45981 0.46401 0.46877 0.47397 0.4797 0.48571 0.49205 0.49853 0.50514 0.5117 0.51822 0.52467 0.53102 0.53738 0.54372 0.55014 0.5565 0.56277 0.56862 0.5738 0.57782 0.58071 0.58232 0.58297 0.58306 0.58309 0.58337 0.58424 0.58572 0.58788 0.59043 0.59317 0.59565 0.59764 0.59883 0.59935 0.59925 0.59882 0.59823 0.59764 0.59697 0.59627 0.59549 0.59458 0.59371 0.59292 0.59226 0.59175 0.59151 0.5914 0.59128 0.59099 0.59033 0.58917 0.58759 0.5858 0.58409 0.58271 0.58169 0.5811 0.58083 0.58074 0.58075 0.5808 0.58078 0.58071 0.58057 0.58044 0.5802 0.57992 0.57979 0.5798 0.57988 0.58024 0.58082 0.58163 0.58283 0.58439 0.58627 0.58848 0.59106 0.59398 0.59707 0.60035 0.60371 0.60724 0.61076 0.61431 0.61789 0.62142 0.62503 0.6285 0.63196 0.63562 0.63924 0.64312 0.64706 0.65119 0.65537 0.65969 0.66393 0.66819 0.6723 0.67644 0.68034 0.68419 0.68792 0.69167 0.6952 0.69871 0.70209 0.70535 0.70859 0.71155 0.71443 0.7171 0.71964 0.72192 0.7239 0.72554 0.72709 0.7283 0.7293 0.72985 0.73028 0.73041 0.73019 0.72982 0.72932
-0.017899 -0.018007 -0.018105 -0.018165 -0.018156 -0.018117 -0.018022 -0.017832 -0.017544 -0.01715 -0.016595 -0.015902 -0.014975 -0.013835 -0.012432 -0.010741 -0.0087831 -0.0065483 -0.0039994 -0.0012638 0.0016907 0.0048808 0.0081979 0.011666 0.015175 0.018739 0.022389 0.025924 0.029399 0.032834 0.036139 0.039301 0.042291 0.045123 0.047881 0.050473 0.052966 0.055443 0.057874 0.060303 0.062706 0.065049 0.067386 0.069569 0.071624 0.073508 0.075157 0.076549 0.077714 0.078576 0.079206 0.079524 0.079596 0.079357 0.078842 0.078015 0.076917 0.075546 0.073924 0.072134 0.070229 0.068211 0.066197 0.064207 0.062276 0.060446 0.05869 0.057102 0.055641 0.054292 0.0531 0.052029 0.051076 0.050254 0.049514 0.048884 0.048326 0.047831 0.047397 0.047005 0.046634 0.046298 0.045979 0.04566 0.04534 0.045 0.044646 0.044257 0.043839 0.0434 0.042935 0.042451 0.04197 0.04149 0.041036 0.040624 0.040253 0.039956 0.039709 0.039564 0.039491 0.039517 0.039639 0.039879 0.040233 0.040706 0.041323 0.042076 0.042968 0.044016 0.045221 0.046609 0.048144 0.04985 0.05178 0.053844 0.056089 0.058485 0.061025 0.063728 0.066524 0.069389 0.072425 0.07547 0.07858 0.081685 0.084765 0.087879 0.090873 0.093774 0.096599 0.099275 0.10187 0.10433 0.10671 0.10909 0.11139 0.1137 0.11607 0.11855 0.12125 0.1242 0.12743 0.13113 0.13514 0.13962 0.14447 0.14973 0.15563 0.16195 0.16879 0.17616 0.18398 0.19234 0.20092 0.20974 0.21892 0.22798 0.23714 0.24614 0.25486 0.26345 0.27155 0.27918 0.28639 0.29294 0.29901 0.30432 0.30908 0.31326 0.31685 0.31994 0.32255 0.32476 0.32666 0.32824 0.32956 0.33068 0.33159 0.33236 0.33298 0.33344 0.33376 0.33394 0.33396 0.33382 0.33354 0.3331 0.33255 0.33187 0.33111 0.33029 0.32937 0.32841 0.32739 0.3263 0.32518 0.32399 0.32277 0.32148 0.3201 0.31884 0.31745 0.31609 0.31473 0.31334 0.31196 0.31062 0.30929 0.30802 0.30677 0.30559 0.30451 0.30345 0.3024 0.3015 0.30067 0.29992 0.29922 0.29859 0.29801 0.2975 0.29701 0.29657 0.29613 0.29573 0.29537 0.29502 0.29469 0.29438 0.29404 0.29373 0.29338 0.29299 0.29257 0.29206 0.29148 0.29083 0.29007 0.28923 0.28827 0.28722 0.28606 0.28475 0.28336 0.28184 0.28022 0.2785 0.27665 0.27475 0.27276 0.27072 0.26866 0.26653 0.26443 0.26231 0.26019 0.2581 0.256 0.25395 0.25191 0.2499 0.24795 0.24599 0.2441 0.24224 0.24042 0.23865 0.23692 0.23523 0.23362 0.23205 0.23057 0.22915 0.22781 0.22658 0.22546 0.22447 0.22359 0.22286 0.22227 0.22178 0.22143 0.22123 0.22117 0.22134 0.22178 0.22249 0.22362 0.22508 0.22694 0.2292 0.2318 0.23481 0.238 0.24134 0.24462 0.24778 0.25076 0.2534 0.25576 0.25769 0.25923 0.26045 0.26133 0.26203 0.26256 0.26305 0.2635 0.26396 0.26442 0.26487 0.26525 0.26555 0.26575 0.26582 0.26582 0.2658 0.26587 0.26608 0.26649 0.26706 0.26778 0.26856 0.26936 0.27011 0.27077 0.27133 0.27179 0.27215 0.27242 0.27259 0.27269 0.27271 0.27268 0.27263 0.27254 0.27237 0.27209 0.27166 0.27104 0.27026 0.26929 0.26819 0.26691 0.26554 0.26406 0.26253 0.26098 0.25939 0.25784 0.25633 0.25488 0.2535 0.25221 0.25102 0.24989 0.24884 0.24784 0.24683 0.24582 0.24472 0.24357 0.24233 0.24103 0.23968 0.23825 0.23691 0.23539 0.23386 0.23235 0.23088 0.22954 0.22836 0.22741 0.2267 0.22629 0.22617 0.22633 0.22683 0.22766 0.22882 0.23034 0.23226 0.23455 0.23738 0.24068 0.24456 0.24905 0.25425 0.26029 0.26713 0.27511 0.28404 0.29414 0.30529 0.31736 0.33033 0.34391 0.35827 0.37277 0.38742 0.40179 0.41566 0.429 0.44136 0.45304 0.46372 0.47351 0.48234 0.49018 0.49716 0.50294 0.50776 0.51144 0.51396 0.51535 0.51568 0.51502 0.5134 0.51095 0.50796 0.50447 0.50064 0.49661 0.49238 0.48813 0.48381 0.47952 0.47524 0.47102 0.4669 0.46277 0.45874 0.4547 0.45076 0.4468 0.4429 0.43901 0.43512 0.43132 0.42747 0.42378 0.42012 0.4166 0.41323 0.41004 0.40707 0.40429 0.40182 0.39962 0.39777 0.39626 0.39514 0.3944 0.39402 0.39401 0.39442 0.39524 0.39645 0.39807 0.40009 0.40247 0.40519 0.40827 0.41159 0.41522 0.41897 0.42293 0.427 0.43116 0.4354 0.43962 0.4439 0.44806 0.45221 0.45616 0.46003 0.46367 0.46713 0.47041 0.47348 0.47639 0.47912 0.48175 0.48424 0.48659 0.48879 0.49087 0.49284 0.49468 0.49644 0.49801 0.49945 0.50077 0.50199 0.5031 0.50409 0.50493 0.50562 0.5062 0.5066 0.5069 0.50701 0.50702 0.50684 0.50651 0.50603 0.50539 0.50462 0.50369 0.50256 0.50128 0.4998 0.49817 0.49639 0.49457 0.49271 0.49085 0.48901 0.48719 0.4853 0.48335 0.48136 0.47923 0.4771 0.47487 0.47266 0.47042 0.46818 0.46595 0.46372 0.4615 0.45928 0.45704 0.45476 0.45246 0.45011 0.44774 0.44531 0.44295 0.44056 0.43821 0.43588 0.43359 0.43137 0.42918 0.42708 0.42499 0.42294 0.42094 0.41897 0.41701 0.41514 0.4133 0.41154 0.40984 0.40829 0.40682 0.40551 0.40438 0.40349 0.40285 0.40252 0.40254 0.40298 0.40385 0.40519 0.40702 0.40937 0.41222 0.41565 0.41955 0.42404 0.42893 0.43432 0.44001 0.44602 0.45215 0.45838 0.46462 0.47086 0.47698 0.48309 0.48912 0.49522 0.5014 0.50752 0.51356 0.51913 0.52407 0.52797 0.53063 0.53207 0.53253 0.53246 0.53231 0.53241 0.53305 0.53432 0.53622 0.53858 0.54112 0.5435 0.54546 0.54678 0.54744 0.54756 0.54736 0.54693 0.54649 0.54595 0.54528 0.54451 0.5437 0.54277 0.54191 0.54114 0.54058 0.5402 0.53992 0.53967 0.53927 0.53857 0.53747 0.53602 0.53442 0.53288 0.53163 0.53071 0.5302 0.52997 0.5299 0.52993 0.52992 0.52991 0.52984 0.52976 0.5296 0.52933 0.52911 0.52896 0.52892 0.52905 0.52935 0.52995 0.53078 0.53193 0.53343 0.53524 0.53741 0.53991 0.54275 0.54576 0.54894 0.5523 0.55565 0.55913 0.5626 0.56611 0.56962 0.57307 0.57661 0.58005 0.58372 0.58735 0.59113 0.59504 0.59909 0.60319 0.60741 0.61152 0.61569 0.61979 0.62377 0.62767 0.63144 0.63518 0.63875 0.64223 0.64562 0.6489 0.65217 0.65534 0.6583 0.66124 0.66388 0.66637 0.66858 0.67059 0.67236 0.67379 0.67501 0.67599 0.67662 0.67707 0.67715 0.67698 0.67664 0.67609
-0.020009 -0.020104 -0.020196 -0.020248 -0.020244 -0.020208 -0.02011 -0.019942 -0.019645 -0.019247 -0.018699 -0.018 -0.017093 -0.015954 -0.014564 -0.01289 -0.010935 -0.0087278 -0.0061875 -0.0034651 -0.0005267 0.0026316 0.0059339 0.0093766 0.01285 0.016386 0.01999 0.023488 0.026919 0.030313 0.033575 0.036704 0.039655 0.042459 0.045185 0.047749 0.050219 0.052675 0.055077 0.057478 0.05986 0.062169 0.064462 0.066615 0.068646 0.070505 0.072122 0.073489 0.074639 0.075483 0.076093 0.076405 0.076469 0.076223 0.075713 0.074904 0.073824 0.07248 0.070891 0.069147 0.067292 0.065323 0.063361 0.061428 0.05953 0.057743 0.056026 0.054465 0.053031 0.05171 0.050542 0.049491 0.048561 0.047757 0.047037 0.046427 0.045882 0.045396 0.044976 0.044591 0.044232 0.043901 0.043588 0.043272 0.042956 0.042619 0.042269 0.041891 0.041479 0.041046 0.040582 0.040108 0.039634 0.039161 0.038718 0.038316 0.037953 0.037653 0.03742 0.037275 0.037204 0.037236 0.037358 0.037602 0.037949 0.038422 0.039036 0.039786 0.040669 0.041715 0.042917 0.044293 0.045817 0.047504 0.049423 0.051472 0.053704 0.056088 0.058607 0.061296 0.064067 0.066913 0.069914 0.07293 0.076012 0.079088 0.08214 0.085218 0.088173 0.091048 0.093842 0.096491 0.099063 0.10151 0.10387 0.10622 0.1085 0.11079 0.11313 0.11558 0.11825 0.12116 0.12437 0.12804 0.13203 0.1365 0.14136 0.14661 0.15252 0.15884 0.16571 0.17311 0.18094 0.18934 0.19797 0.20683 0.21608 0.22525 0.23448 0.24356 0.25238 0.26109 0.26928 0.27703 0.28433 0.29096 0.29712 0.30251 0.30731 0.31154 0.31516 0.31828 0.32092 0.32315 0.32505 0.32663 0.32796 0.32907 0.32996 0.33072 0.33131 0.33176 0.33207 0.33222 0.33222 0.33203 0.33172 0.33126 0.33068 0.32997 0.32919 0.32834 0.32741 0.32643 0.32537 0.32428 0.32312 0.32188 0.32062 0.3193 0.31789 0.31658 0.31515 0.31374 0.31232 0.31087 0.30946 0.30805 0.30668 0.30536 0.30406 0.30287 0.30174 0.30064 0.29958 0.29863 0.29777 0.297 0.29629 0.29565 0.29506 0.29455 0.29405 0.2936 0.29317 0.29278 0.29242 0.29208 0.29174 0.29141 0.29108 0.29077 0.29042 0.29003 0.28959 0.28908 0.2885 0.28785 0.28707 0.28622 0.28525 0.28419 0.28302 0.2817 0.28028 0.27875 0.2771 0.27537 0.27349 0.27157 0.26955 0.26748 0.2654 0.26324 0.26111 0.25896 0.25682 0.2547 0.25257 0.25048 0.24843 0.2464 0.24442 0.24245 0.24053 0.23865 0.23681 0.23503 0.23326 0.23156 0.22993 0.22834 0.22683 0.22538 0.22401 0.22275 0.22161 0.22058 0.21967 0.21889 0.21826 0.21775 0.21735 0.21711 0.21703 0.21717 0.21758 0.21827 0.21936 0.22078 0.22261 0.22483 0.2274 0.23036 0.23349 0.23678 0.24001 0.24311 0.246 0.24855 0.2508 0.25258 0.25402 0.25513 0.25591 0.25651 0.25698 0.25739 0.2578 0.25822 0.25866 0.25909 0.25948 0.25981 0.26005 0.2602 0.26029 0.26039 0.26056 0.26086 0.26136 0.26199 0.26276 0.26356 0.26436 0.2651 0.26573 0.26626 0.26668 0.267 0.26726 0.26744 0.26757 0.26762 0.26765 0.26765 0.26763 0.26753 0.2673 0.26689 0.26631 0.26553 0.26456 0.26344 0.26216 0.26076 0.25926 0.25771 0.25614 0.25453 0.25297 0.25144 0.24996 0.24858 0.24727 0.24606 0.24494 0.24388 0.24288 0.24187 0.24084 0.23973 0.23857 0.23732 0.23603 0.23466 0.23323 0.23186 0.23034 0.2288 0.22726 0.22579 0.22444 0.22326 0.22231 0.22161 0.22121 0.22108 0.22124 0.22175 0.22259 0.22375 0.22529 0.2272 0.22948 0.23234 0.23567 0.23961 0.24415 0.24943 0.25551 0.26243 0.27052 0.27954 0.28976 0.30105 0.31329 0.32648 0.34026 0.35486 0.36959 0.3845 0.39913 0.41326 0.4269 0.43949 0.45141 0.46231 0.47232 0.48132 0.48933 0.49646 0.50237 0.50728 0.51102 0.51357 0.51498 0.51526 0.51455 0.51284 0.51035 0.50722 0.50361 0.49964 0.49547 0.49114 0.48675 0.48229 0.47786 0.47344 0.46911 0.46485 0.46059 0.45645 0.45228 0.44822 0.44415 0.44012 0.43613 0.43211 0.42819 0.42425 0.42044 0.41667 0.41306 0.40958 0.40631 0.40325 0.4004 0.39787 0.39562 0.39372 0.39215 0.391 0.39023 0.38985 0.38986 0.3903 0.39113 0.39238 0.39403 0.3961 0.39854 0.40133 0.40448 0.40787 0.41159 0.41545 0.41948 0.42362 0.42788 0.43219 0.43649 0.44086 0.4451 0.44933 0.45337 0.45732 0.46106 0.46461 0.46799 0.47114 0.47417 0.47699 0.47972 0.48226 0.48469 0.48697 0.48912 0.49116 0.49308 0.49485 0.4965 0.49801 0.49938 0.50064 0.50175 0.50278 0.50362 0.50436 0.50493 0.50535 0.50565 0.50577 0.50575 0.50556 0.5052 0.5047 0.50402 0.50319 0.50222 0.50105 0.49972 0.4982 0.49651 0.49468 0.49281 0.49087 0.48892 0.487 0.48506 0.48309 0.48104 0.47896 0.47676 0.47453 0.47224 0.46996 0.46762 0.46532 0.46301 0.46069 0.45837 0.45608 0.45379 0.45142 0.44906 0.44659 0.44414 0.44165 0.4392 0.43675 0.43434 0.43193 0.42956 0.4273 0.42504 0.42287 0.4207 0.41861 0.41652 0.41449 0.41248 0.41054 0.40862 0.40682 0.40509 0.40345 0.40196 0.40062 0.39943 0.39848 0.39781 0.39745 0.39743 0.39786 0.39869 0.40002 0.40181 0.40416 0.40703 0.41046 0.41439 0.41893 0.42389 0.42934 0.4351 0.44123 0.4475 0.45385 0.46019 0.46654 0.47275 0.47896 0.4851 0.4913 0.49758 0.50386 0.51006 0.51576 0.52082 0.52474 0.52736 0.52878 0.52922 0.52899 0.52868 0.52864 0.52916 0.53032 0.53215 0.53446 0.537 0.53941 0.54143 0.54287 0.54364 0.54391 0.5438 0.54347 0.54307 0.54252 0.54188 0.54107 0.54021 0.53923 0.53831 0.53745 0.53677 0.53624 0.53585 0.53549 0.53495 0.53418 0.53303 0.53158 0.52999 0.52847 0.52724 0.52634 0.52584 0.52558 0.5255 0.5255 0.52553 0.52547 0.52542 0.52524 0.52506 0.52481 0.52454 0.52438 0.52431 0.52447 0.5248 0.52539 0.52625 0.52744 0.52895 0.53087 0.53309 0.53562 0.53855 0.54165 0.54497 0.54835 0.55189 0.55548 0.55911 0.56273 0.56641 0.56999 0.57358 0.57723 0.58091 0.58466 0.58862 0.59262 0.59685 0.60106 0.60538 0.6096 0.61389 0.61805 0.6222 0.6261 0.63001 0.63371 0.6374 0.64099 0.64454 0.64798 0.6513 0.65454 0.65764 0.66063 0.66336 0.66594 0.66814 0.6702 0.67195 0.67345 0.67469 0.67567 0.67634 0.67668 0.67678 0.67658 0.67625 0.67568
-0.0074092 -0.0075279 -0.0076355 -0.0076866 -0.0076739 -0.007629 -0.0074923 -0.0072624 -0.0069004 -0.0063908 -0.0056999 -0.0048287 -0.0036825 -0.0022393 -0.0004779 0.0016305 0.0040838 0.0068756 0.010074 0.01351 0.017221 0.021219 0.025396 0.029762 0.034176 0.038666 0.04323 0.047663 0.052008 0.05629 0.060387 0.064298 0.067983 0.071455 0.074823 0.077975 0.081013 0.084021 0.08697 0.089909 0.092836 0.095697 0.098549 0.10122 0.10374 0.10607 0.1081 0.10983 0.11129 0.11239 0.11319 0.11363 0.11376 0.1135 0.11291 0.11192 0.11059 0.10892 0.10693 0.10472 0.10237 0.099857 0.097352 0.094879 0.092463 0.090185 0.087997 0.086015 0.084183 0.082507 0.081019 0.079683 0.078496 0.077469 0.076541 0.075752 0.075046 0.074419 0.073867 0.073364 0.072893 0.072458 0.072041 0.071626 0.071207 0.07077 0.070319 0.069825 0.069303 0.068755 0.06817 0.067573 0.066976 0.066383 0.065825 0.065332 0.064883 0.064521 0.064231 0.06406 0.063987 0.064039 0.064205 0.064523 0.064977 0.065579 0.066361 0.067301 0.068424 0.069752 0.071266 0.073005 0.074937 0.077064 0.079472 0.082038 0.084831 0.087808 0.090952 0.094301 0.09775 0.10129 0.10501 0.10873 0.11253 0.11632 0.12008 0.12387 0.12751 0.13104 0.13449 0.13776 0.14094 0.14397 0.14688 0.14979 0.1526 0.15539 0.15823 0.16127 0.16456 0.16817 0.17215 0.17669 0.18161 0.18709 0.19303 0.19949 0.20663 0.21424 0.22246 0.23129 0.2406 0.25054 0.2607 0.27109 0.28186 0.29249 0.30313 0.31355 0.32361 0.33351 0.34277 0.3515 0.35972 0.36716 0.37407 0.38007 0.38541 0.39009 0.39409 0.39751 0.4004 0.40281 0.40487 0.40658 0.40801 0.40922 0.4102 0.41103 0.41168 0.41218 0.4125 0.41265 0.41263 0.41242 0.41205 0.41151 0.41085 0.41006 0.40918 0.40824 0.40716 0.40604 0.40487 0.40366 0.40236 0.40099 0.39957 0.39811 0.39657 0.3951 0.39348 0.39187 0.39026 0.38863 0.38702 0.38542 0.38387 0.38239 0.38091 0.37951 0.37822 0.37695 0.37575 0.37468 0.3737 0.37283 0.37201 0.3713 0.37062 0.37004 0.36949 0.36898 0.36851 0.36809 0.36768 0.3673 0.36692 0.36655 0.36617 0.36581 0.36541 0.36497 0.36448 0.3639 0.36326 0.36253 0.36168 0.36072 0.35967 0.35848 0.35719 0.35573 0.35417 0.35247 0.35065 0.34873 0.34665 0.34452 0.34229 0.34001 0.3377 0.33531 0.33294 0.33054 0.32815 0.32581 0.32343 0.32111 0.31881 0.31655 0.31433 0.31212 0.30999 0.30787 0.3058 0.30381 0.30184 0.29995 0.29813 0.29636 0.29468 0.29308 0.29158 0.29021 0.28896 0.28785 0.28689 0.2861 0.28544 0.28494 0.28458 0.28437 0.28433 0.28456 0.28507 0.28592 0.28723 0.28892 0.2911 0.2937 0.29672 0.30019 0.30388 0.30776 0.31158 0.31526 0.31875 0.32189 0.32472 0.32705 0.32898 0.33053 0.33168 0.33261 0.33336 0.33403 0.33466 0.33527 0.33586 0.33641 0.33686 0.3372 0.33735 0.33734 0.3372 0.33704 0.33699 0.3371 0.33748 0.33808 0.33889 0.33981 0.34076 0.34168 0.34252 0.34325 0.34386 0.34435 0.34473 0.34497 0.34509 0.34511 0.34504 0.34494 0.3448 0.34457 0.34423 0.34371 0.34299 0.34207 0.34096 0.33969 0.33825 0.33666 0.33498 0.33325 0.33147 0.32965 0.32787 0.32611 0.32443 0.32285 0.32133 0.31996 0.31865 0.31743 0.31626 0.31507 0.31387 0.3126 0.31125 0.3098 0.3083 0.30674 0.3051 0.30352 0.30178 0.30004 0.2983 0.29661 0.29508 0.29375 0.29266 0.29185 0.2914 0.29124 0.29145 0.29204 0.293 0.29434 0.29612 0.29833 0.30098 0.30429 0.30816 0.31272 0.31798 0.32404 0.33102 0.33891 0.34814 0.35839 0.3699 0.38254 0.3962 0.41084 0.42612 0.44217 0.45831 0.47456 0.49045 0.50568 0.5203 0.53376 0.54643 0.55798 0.56851 0.57796 0.58634 0.59376 0.59988 0.60495 0.60883 0.61149 0.61292 0.61321 0.6125 0.61078 0.60823 0.60506 0.60134 0.59726 0.59298 0.58849 0.58395 0.57933 0.57473 0.57012 0.56556 0.56108 0.5566 0.55225 0.54783 0.5435 0.53918 0.5349 0.53064 0.52637 0.52218 0.51797 0.51393 0.50991 0.50605 0.50233 0.49884 0.49555 0.49249 0.48977 0.48735 0.48532 0.48361 0.48235 0.48151 0.48105 0.48102 0.48142 0.48228 0.48357 0.48527 0.48744 0.48999 0.49291 0.49622 0.49978 0.50368 0.50772 0.51199 0.51637 0.52082 0.52535 0.52991 0.53449 0.53896 0.54342 0.54764 0.55179 0.5557 0.55944 0.56291 0.56618 0.56934 0.57221 0.57505 0.57765 0.58014 0.58247 0.58466 0.5867 0.58861 0.59035 0.59198 0.59347 0.5948 0.59603 0.59712 0.59811 0.59895 0.59968 0.60025 0.60065 0.60091 0.60097 0.6009 0.60069 0.60033 0.59977 0.5991 0.59822 0.59716 0.59594 0.59454 0.59289 0.59109 0.58913 0.58716 0.58513 0.58312 0.58115 0.57918 0.57721 0.57512 0.57299 0.5707 0.56836 0.56592 0.56348 0.56102 0.55854 0.55608 0.55362 0.55119 0.54876 0.54632 0.54381 0.54124 0.53867 0.53605 0.53341 0.53084 0.52823 0.52571 0.52318 0.5207 0.51827 0.51593 0.51362 0.51135 0.50912 0.50693 0.50478 0.5026 0.50057 0.49858 0.49667 0.49485 0.49317 0.49162 0.49026 0.48909 0.48821 0.48762 0.48737 0.48754 0.48819 0.48927 0.49092 0.49307 0.49584 0.49913 0.50308 0.5075 0.51255 0.51802 0.52397 0.53018 0.53672 0.54337 0.55015 0.55686 0.56354 0.57012 0.57671 0.58325 0.58974 0.59628 0.60281 0.60918 0.61511 0.62036 0.62451 0.62745 0.62922 0.62999 0.63022 0.63044 0.63098 0.63207 0.63378 0.63621 0.63904 0.64204 0.64468 0.64673 0.64792 0.64836 0.64806 0.64746 0.64679 0.64609 0.64546 0.64474 0.64394 0.64307 0.64225 0.64148 0.64085 0.64042 0.64028 0.64032 0.64033 0.64019 0.63959 0.63843 0.6368 0.63489 0.633 0.63144 0.63034 0.62965 0.62938 0.62927 0.62932 0.62938 0.6294 0.62934 0.62921 0.62901 0.62879 0.62852 0.6284 0.62836 0.62846 0.62875 0.62932 0.63015 0.63135 0.63285 0.63478 0.63701 0.6396 0.64251 0.64559 0.64884 0.65229 0.65581 0.65937 0.66294 0.6665 0.67016 0.67374 0.67729 0.68093 0.68455 0.68828 0.69223 0.69617 0.70034 0.70453 0.70886 0.71309 0.71744 0.72161 0.72578 0.72972 0.73361 0.73732 0.74106 0.74469 0.74817 0.75159 0.75489 0.75806 0.76125 0.76429 0.76699 0.76961 0.77188 0.77401 0.7758 0.77731 0.7785 0.77955 0.78016 0.78054 0.78061 0.7804 0.77994 0.77938
-0.010314 -0.010435 -0.010534 -0.010587 -0.010582 -0.010547 -0.01042 -0.010212 -0.0098777 -0.0094212 -0.0087701 -0.0079456 -0.0068642 -0.005501 -0.0038114 -0.0017866 0.0005686 0.0032651 0.0063541 0.0096918 0.013309 0.017205 0.021274 0.025525 0.029824 0.034197 0.038647 0.042967 0.047189 0.051358 0.055357 0.059179 0.06279 0.066211 0.069526 0.072642 0.075648 0.078641 0.081565 0.084489 0.08739 0.09023 0.093055 0.095703 0.098205 0.10051 0.10254 0.10427 0.10572 0.10682 0.10763 0.10806 0.10819 0.10794 0.10735 0.10638 0.10509 0.10345 0.10151 0.099358 0.097056 0.094625 0.092192 0.089786 0.087437 0.085226 0.083108 0.081178 0.079408 0.077783 0.076342 0.075055 0.073913 0.072932 0.072051 0.071299 0.070634 0.07004 0.069513 0.069047 0.068609 0.068196 0.067796 0.067401 0.066998 0.066574 0.066134 0.065657 0.065144 0.06461 0.064037 0.063462 0.062881 0.062306 0.061768 0.061282 0.060849 0.060492 0.060215 0.060042 0.059964 0.060013 0.06017 0.060475 0.060913 0.061501 0.062261 0.063185 0.064285 0.065575 0.067055 0.068751 0.070637 0.072716 0.075069 0.077583 0.080304 0.083214 0.086285 0.089561 0.092923 0.096373 0.1 0.10364 0.10734 0.11104 0.1147 0.1184 0.12195 0.1254 0.12876 0.13195 0.13505 0.138 0.14086 0.14371 0.14646 0.14923 0.15205 0.15496 0.15817 0.16168 0.16554 0.16996 0.17474 0.1801 0.18592 0.19224 0.19926 0.20671 0.21479 0.22349 0.23266 0.24245 0.25249 0.26276 0.27345 0.28402 0.29463 0.30502 0.3151 0.325 0.3343 0.34307 0.35134 0.35884 0.36581 0.37186 0.37727 0.38202 0.38604 0.38951 0.39241 0.39485 0.39694 0.39868 0.40013 0.40135 0.40234 0.40318 0.40382 0.40432 0.40466 0.40482 0.40483 0.40463 0.40429 0.40376 0.4031 0.40233 0.40144 0.40049 0.39945 0.39829 0.39708 0.39585 0.39453 0.39315 0.39174 0.39025 0.38872 0.38727 0.38566 0.38409 0.38254 0.38095 0.37939 0.37784 0.37636 0.37492 0.37351 0.37219 0.37094 0.36976 0.36862 0.36761 0.36669 0.36587 0.36513 0.36444 0.36381 0.36327 0.36276 0.36231 0.36189 0.36149 0.36111 0.36075 0.36039 0.36006 0.35971 0.35938 0.359 0.35858 0.35809 0.35753 0.35688 0.35617 0.35531 0.35437 0.3533 0.35211 0.35081 0.34934 0.34778 0.34606 0.34423 0.34229 0.3402 0.33804 0.33579 0.33348 0.33115 0.32874 0.32635 0.32393 0.32153 0.31915 0.31674 0.31439 0.31207 0.30977 0.30752 0.30529 0.30312 0.30099 0.2989 0.29687 0.29487 0.29294 0.29107 0.28926 0.28755 0.28589 0.28434 0.2829 0.28158 0.2804 0.27934 0.27845 0.2777 0.2771 0.27664 0.27633 0.27621 0.27634 0.27678 0.27756 0.27879 0.28042 0.28255 0.28513 0.28812 0.29159 0.29527 0.29914 0.30294 0.30662 0.3101 0.31319 0.31597 0.31825 0.32011 0.32159 0.32267 0.32352 0.3242 0.32479 0.32535 0.3259 0.32646 0.327 0.32746 0.32782 0.32804 0.3281 0.32806 0.32801 0.32807 0.32829 0.32877 0.32945 0.33034 0.33132 0.33232 0.33327 0.33413 0.33488 0.33551 0.336 0.33638 0.33663 0.33679 0.33684 0.33683 0.33678 0.3367 0.33652 0.33623 0.33574 0.33504 0.33413 0.33302 0.33174 0.33027 0.32866 0.32696 0.32518 0.32338 0.32153 0.31973 0.31796 0.31627 0.31467 0.31316 0.31177 0.31045 0.30924 0.30806 0.30688 0.30569 0.30441 0.30307 0.30163 0.30013 0.29856 0.29692 0.29533 0.29357 0.29182 0.29007 0.28838 0.28686 0.2855 0.28441 0.28359 0.28313 0.28297 0.28316 0.28373 0.28467 0.28599 0.28775 0.28994 0.29258 0.29587 0.2997 0.30423 0.30946 0.31551 0.32245 0.33036 0.33954 0.34978 0.3613 0.37397 0.38765 0.40234 0.41769 0.43385 0.45014 0.46658 0.48262 0.49807 0.51293 0.52661 0.53955 0.55132 0.5621 0.57176 0.58037 0.588 0.59435 0.59962 0.60366 0.60641 0.60796 0.60833 0.60759 0.60586 0.60325 0.60002 0.59622 0.59204 0.58766 0.58306 0.57844 0.57367 0.56897 0.56428 0.55963 0.55506 0.55051 0.54605 0.54151 0.53711 0.53268 0.52831 0.52397 0.51962 0.51538 0.51111 0.50698 0.50291 0.49898 0.49523 0.49166 0.48835 0.48526 0.48254 0.48012 0.47808 0.47639 0.47515 0.47432 0.47391 0.47393 0.47438 0.47527 0.47662 0.4784 0.48065 0.48331 0.48634 0.48978 0.49345 0.49749 0.50165 0.50605 0.51057 0.51518 0.51985 0.52453 0.52927 0.53387 0.53848 0.54289 0.54719 0.55124 0.55511 0.55876 0.56218 0.56545 0.56852 0.57144 0.57419 0.57681 0.57928 0.58158 0.58374 0.58575 0.58764 0.58936 0.59098 0.59235 0.59367 0.59483 0.59589 0.5968 0.59755 0.59816 0.59858 0.59889 0.59901 0.59895 0.5987 0.59835 0.59781 0.59708 0.59622 0.59514 0.59387 0.59242 0.59072 0.5889 0.58689 0.58483 0.58272 0.58065 0.57857 0.57655 0.5745 0.57233 0.57011 0.56779 0.56536 0.56283 0.56032 0.55775 0.55523 0.55269 0.55018 0.54762 0.5451 0.54256 0.53995 0.53733 0.53464 0.53197 0.52926 0.52658 0.52392 0.52131 0.51873 0.51616 0.51368 0.51127 0.50892 0.50659 0.50432 0.50207 0.49984 0.49769 0.49556 0.49349 0.49151 0.48964 0.4879 0.48629 0.48485 0.48359 0.4826 0.48192 0.4816 0.48167 0.48217 0.4832 0.48474 0.48682 0.48953 0.49276 0.49667 0.50113 0.50622 0.51177 0.51784 0.52426 0.53104 0.53789 0.5449 0.55189 0.55889 0.56579 0.57264 0.57949 0.58635 0.59324 0.6001 0.60685 0.61309 0.61866 0.62303 0.62615 0.62796 0.62879 0.62894 0.62902 0.62945 0.63052 0.63221 0.63465 0.63755 0.64059 0.64335 0.6454 0.64663 0.64707 0.64687 0.64628 0.64554 0.64483 0.64405 0.64326 0.64239 0.64147 0.6405 0.6396 0.63888 0.63846 0.63819 0.63816 0.63812 0.6379 0.63727 0.63604 0.63434 0.63241 0.63048 0.62892 0.62781 0.62721 0.62691 0.62688 0.62692 0.62696 0.627 0.62694 0.62685 0.62669 0.62643 0.62619 0.62606 0.62598 0.62613 0.62652 0.62714 0.62806 0.62934 0.63101 0.63305 0.63548 0.63829 0.64136 0.64461 0.64804 0.65164 0.65541 0.65903 0.66289 0.66665 0.67037 0.67413 0.67793 0.68163 0.68539 0.68937 0.69338 0.69744 0.70183 0.70614 0.71063 0.71512 0.71958 0.72383 0.72811 0.73223 0.7361 0.74006 0.74378 0.74748 0.75103 0.75458 0.75795 0.76128 0.76443 0.76746 0.77029 0.77291 0.77531 0.77741 0.77919 0.78082 0.78207 0.78312 0.78378 0.78412 0.78418 0.78393 0.78345 0.78275
-0.020386 -0.020471 -0.020553 -0.020604 -0.020598 -0.020562 -0.020466 -0.020303 -0.020017 -0.019636 -0.019076 -0.018393 -0.017486 -0.016351 -0.01496 -0.013283 -0.011329 -0.00911 -0.0065581 -0.0038084 -0.0008318 0.0023815 0.0057462 0.0092566 0.012818 0.016431 0.020112 0.023681 0.027178 0.030618 0.033916 0.037055 0.040009 0.042803 0.045514 0.048059 0.050507 0.052943 0.055334 0.057722 0.060097 0.062417 0.064733 0.066925 0.069 0.070922 0.07261 0.07406 0.075295 0.076231 0.076929 0.077317 0.077461 0.077288 0.076833 0.076067 0.075025 0.073703 0.072128 0.070383 0.068517 0.066539 0.064559 0.062603 0.060689 0.058885 0.05715 0.05558 0.054135 0.052806 0.051642 0.050589 0.04966 0.048865 0.048146 0.04754 0.046997 0.046514 0.046086 0.045695 0.045323 0.044979 0.044648 0.044308 0.043966 0.043606 0.043235 0.042831 0.0424 0.041948 0.041467 0.040988 0.040503 0.040034 0.039587 0.039191 0.038828 0.038533 0.038298 0.038157 0.038091 0.038122 0.03825 0.038494 0.038848 0.039326 0.039947 0.040695 0.04159 0.042643 0.043854 0.045247 0.046789 0.048496 0.050426 0.052491 0.054732 0.057121 0.059642 0.062328 0.065098 0.06793 0.070914 0.07391 0.076955 0.080005 0.083015 0.086062 0.088984 0.091814 0.094584 0.097212 0.099766 0.10219 0.10453 0.10687 0.10913 0.11139 0.1137 0.11613 0.11876 0.12163 0.12481 0.12845 0.1324 0.13686 0.1417 0.14693 0.15283 0.15914 0.166 0.17339 0.18125 0.18965 0.1983 0.2072 0.21649 0.22571 0.23501 0.24416 0.25307 0.26186 0.27015 0.27801 0.28543 0.2922 0.29851 0.304 0.30889 0.31318 0.31682 0.31993 0.32253 0.32471 0.32657 0.32812 0.3294 0.33047 0.33136 0.3321 0.33268 0.33312 0.3334 0.33354 0.33351 0.33331 0.33297 0.33246 0.33183 0.33107 0.33022 0.32931 0.3283 0.32722 0.32609 0.32488 0.32365 0.32236 0.32102 0.31963 0.31815 0.31678 0.31528 0.31383 0.31237 0.31089 0.30944 0.30802 0.30664 0.30532 0.30401 0.30283 0.30172 0.30063 0.29957 0.29865 0.29781 0.29708 0.29639 0.29578 0.29522 0.29474 0.29428 0.29388 0.29349 0.29313 0.29282 0.2925 0.29219 0.29189 0.29158 0.29127 0.29094 0.29055 0.29011 0.2896 0.28902 0.28838 0.28762 0.28677 0.28582 0.28476 0.2836 0.28228 0.28088 0.27935 0.2777 0.27598 0.27411 0.27219 0.27019 0.26814 0.26605 0.26391 0.26177 0.25962 0.25748 0.25536 0.25322 0.25113 0.24905 0.24702 0.24504 0.24305 0.24114 0.23926 0.23741 0.23562 0.23386 0.23216 0.23052 0.22893 0.22743 0.22598 0.2246 0.22334 0.22217 0.22112 0.22019 0.21939 0.21871 0.21814 0.21769 0.21737 0.21719 0.21723 0.21753 0.21811 0.21907 0.22036 0.22208 0.22419 0.22667 0.22953 0.2326 0.23583 0.23902 0.24211 0.24504 0.24765 0.24998 0.25187 0.25342 0.25464 0.25551 0.25621 0.25673 0.25719 0.25762 0.25805 0.25847 0.25888 0.25921 0.25947 0.25962 0.25966 0.25963 0.25963 0.25973 0.25999 0.26047 0.26112 0.26192 0.26282 0.26371 0.26457 0.26532 0.26598 0.26652 0.26695 0.26729 0.26753 0.26771 0.26781 0.26785 0.26787 0.26784 0.26773 0.2675 0.2671 0.2665 0.26572 0.26473 0.26359 0.26228 0.26085 0.25933 0.25775 0.25615 0.25451 0.25291 0.25133 0.24983 0.2484 0.24706 0.24583 0.24466 0.2436 0.24255 0.24153 0.24047 0.23935 0.23817 0.23691 0.2356 0.23422 0.23275 0.23136 0.22981 0.22826 0.22673 0.22524 0.2239 0.22272 0.22176 0.22105 0.22064 0.2205 0.22066 0.22116 0.22198 0.22313 0.22464 0.22651 0.22877 0.23159 0.23491 0.23882 0.24337 0.24863 0.25469 0.26159 0.26966 0.27864 0.28885 0.30013 0.31238 0.32561 0.33949 0.35421 0.3691 0.38419 0.39902 0.41337 0.4272 0.44003 0.45219 0.46331 0.47349 0.48269 0.49087 0.49813 0.50419 0.50919 0.51302 0.51562 0.51703 0.51733 0.51658 0.51482 0.51223 0.50902 0.5053 0.50124 0.49692 0.49243 0.48792 0.48329 0.47872 0.47413 0.46963 0.46518 0.46072 0.45636 0.45197 0.44766 0.4434 0.43917 0.43499 0.43082 0.42676 0.42272 0.41881 0.41497 0.4113 0.40778 0.40446 0.4014 0.39854 0.39601 0.39377 0.39187 0.39035 0.38925 0.38852 0.38818 0.38821 0.38869 0.38954 0.39083 0.39252 0.3946 0.39709 0.39988 0.40308 0.40653 0.41028 0.41416 0.41822 0.42241 0.42669 0.43109 0.43546 0.43989 0.44425 0.44859 0.45276 0.45687 0.46078 0.46454 0.46815 0.47154 0.47484 0.47793 0.48096 0.4838 0.48648 0.48903 0.4914 0.49363 0.49568 0.49762 0.49933 0.50091 0.50232 0.50365 0.50482 0.50582 0.50669 0.50744 0.508 0.50842 0.50866 0.5087 0.50859 0.50831 0.50791 0.50731 0.50659 0.50568 0.5046 0.50333 0.50187 0.50018 0.4984 0.49639 0.49435 0.49222 0.49009 0.48794 0.48581 0.48365 0.48142 0.47912 0.4767 0.47424 0.47164 0.46909 0.46648 0.4639 0.46128 0.45875 0.45618 0.45363 0.45115 0.44859 0.44602 0.44342 0.44086 0.43824 0.43569 0.43314 0.43068 0.42822 0.42582 0.42346 0.42117 0.41896 0.41673 0.41461 0.41248 0.41042 0.40839 0.40644 0.40455 0.40277 0.40106 0.39948 0.39803 0.39677 0.39566 0.3948 0.39421 0.39393 0.39403 0.39453 0.39546 0.39689 0.39876 0.40126 0.40421 0.40779 0.41186 0.41655 0.42165 0.42723 0.43308 0.43929 0.44563 0.45212 0.45856 0.46502 0.47144 0.47776 0.48412 0.49051 0.49702 0.50348 0.50989 0.5158 0.521 0.52508 0.52787 0.52933 0.5298 0.52966 0.52945 0.52948 0.53011 0.53145 0.53346 0.53596 0.53871 0.54129 0.54344 0.54488 0.54567 0.54591 0.54576 0.54545 0.54501 0.54444 0.54375 0.54292 0.54199 0.54094 0.53998 0.53912 0.53841 0.53787 0.53753 0.5372 0.53671 0.5359 0.53471 0.53317 0.53147 0.52987 0.52856 0.52767 0.52714 0.52692 0.52692 0.52698 0.52705 0.52707 0.52697 0.5269 0.52672 0.52645 0.5262 0.52608 0.52599 0.52614 0.52648 0.52712 0.52797 0.52923 0.53087 0.53283 0.53515 0.53785 0.5409 0.54416 0.54763 0.55124 0.5549 0.55863 0.5624 0.56613 0.56994 0.57361 0.57736 0.58111 0.58493 0.58884 0.59284 0.59696 0.60125 0.60557 0.60996 0.6143 0.61874 0.62298 0.6272 0.63123 0.63521 0.63902 0.64282 0.64654 0.65009 0.65363 0.65708 0.66038 0.66366 0.66679 0.66968 0.67239 0.67484 0.67702 0.67887 0.68048 0.68178 0.68278 0.68351 0.68391 0.68392 0.68377 0.68331 0.68274
-0.019605 -0.019695 -0.019776 -0.019823 -0.01982 -0.019779 -0.01968 -0.019489 -0.019193 -0.018785 -0.018194 -0.017464 -0.016504 -0.015302 -0.013823 -0.012046 -0.0099743 -0.0076111 -0.0049042 -0.0019878 0.0011787 0.0045921 0.0081536 0.011885 0.015652 0.019484 0.023393 0.027172 0.03087 0.034517 0.038003 0.041322 0.044447 0.047391 0.050248 0.052926 0.055502 0.058059 0.060572 0.063074 0.065565 0.068007 0.070439 0.072738 0.074914 0.07693 0.078708 0.080231 0.081527 0.082514 0.083255 0.083671 0.083824 0.083653 0.083189 0.082397 0.08131 0.079936 0.078287 0.076461 0.074501 0.072423 0.070339 0.068276 0.066261 0.064361 0.062538 0.060882 0.059357 0.057957 0.056721 0.055612 0.05463 0.05379 0.053034 0.052388 0.051812 0.051301 0.050849 0.050434 0.050044 0.049683 0.049331 0.04898 0.04862 0.048246 0.047854 0.047436 0.046986 0.046513 0.046012 0.045508 0.04501 0.044505 0.044039 0.043615 0.043237 0.042933 0.042689 0.042542 0.042477 0.042518 0.042659 0.042918 0.043296 0.043802 0.044457 0.045254 0.0462 0.047314 0.048596 0.050068 0.051704 0.053506 0.055548 0.057721 0.060081 0.062599 0.065252 0.068075 0.070981 0.073955 0.077089 0.080223 0.083406 0.086584 0.089727 0.092903 0.09595 0.098908 0.1018 0.10453 0.10719 0.10972 0.11218 0.11462 0.11698 0.11934 0.12175 0.12427 0.127 0.12999 0.13327 0.13705 0.14115 0.14571 0.15066 0.1561 0.16216 0.16862 0.17563 0.18319 0.1912 0.19973 0.20854 0.21757 0.22697 0.23629 0.24568 0.25491 0.26385 0.2727 0.28102 0.2889 0.29634 0.3031 0.30941 0.3149 0.31979 0.32407 0.3277 0.3308 0.33337 0.33554 0.33739 0.33892 0.34021 0.3413 0.34218 0.34293 0.34352 0.34397 0.34426 0.34439 0.34437 0.34417 0.34384 0.34333 0.3427 0.34196 0.3411 0.34019 0.33918 0.33812 0.33698 0.33582 0.33457 0.33328 0.33196 0.33053 0.32912 0.32779 0.32632 0.32487 0.32343 0.32196 0.32054 0.31914 0.31779 0.31648 0.3152 0.31401 0.31288 0.31183 0.31081 0.3099 0.30908 0.30835 0.30769 0.30708 0.30652 0.30604 0.30559 0.30519 0.3048 0.30445 0.30412 0.30381 0.30349 0.3032 0.30289 0.30257 0.30223 0.30183 0.3014 0.3009 0.30033 0.29968 0.29891 0.29807 0.2971 0.29605 0.29488 0.29357 0.29216 0.29062 0.28897 0.28724 0.28535 0.28342 0.28141 0.27935 0.27726 0.2751 0.27296 0.27079 0.26863 0.2665 0.26435 0.26225 0.26016 0.25811 0.25611 0.25411 0.25218 0.25028 0.24842 0.24661 0.24483 0.24311 0.24146 0.23987 0.23835 0.23688 0.23551 0.23424 0.23308 0.23203 0.23111 0.23031 0.22965 0.22909 0.22865 0.22834 0.22817 0.22823 0.22854 0.22913 0.23013 0.23146 0.23322 0.23537 0.23789 0.24081 0.24392 0.24722 0.25046 0.25361 0.25659 0.25927 0.26167 0.26364 0.26525 0.26652 0.26746 0.2682 0.26877 0.26927 0.26974 0.27019 0.27063 0.27105 0.27138 0.27164 0.27176 0.27177 0.27171 0.27165 0.2717 0.27191 0.27234 0.27296 0.27376 0.27464 0.27555 0.27642 0.27719 0.27787 0.27843 0.2789 0.27927 0.27953 0.2797 0.27978 0.2798 0.27979 0.27975 0.27962 0.27937 0.27896 0.27835 0.27754 0.27656 0.27542 0.27413 0.2727 0.27119 0.26961 0.268 0.26637 0.26476 0.26319 0.26169 0.26026 0.25892 0.25769 0.25651 0.25543 0.25439 0.25335 0.25229 0.25116 0.24997 0.2487 0.24737 0.24597 0.2445 0.24311 0.24156 0.24 0.23845 0.23696 0.23561 0.23443 0.23348 0.23276 0.23234 0.23221 0.23237 0.23287 0.2337 0.23487 0.23637 0.23827 0.24055 0.24339 0.24674 0.2507 0.25528 0.26061 0.26674 0.27366 0.28176 0.29084 0.30107 0.31238 0.32464 0.33786 0.35174 0.36639 0.38122 0.39623 0.41097 0.42519 0.43892 0.45163 0.46366 0.47463 0.48473 0.4938 0.50186 0.50902 0.51496 0.51991 0.52369 0.52625 0.52761 0.52789 0.52713 0.52538 0.5228 0.51964 0.51593 0.51189 0.50762 0.50321 0.49877 0.49421 0.48968 0.48515 0.4807 0.47629 0.47188 0.46758 0.46325 0.45897 0.45473 0.45056 0.44641 0.44231 0.4383 0.43429 0.43044 0.42664 0.423 0.41953 0.41624 0.41321 0.41036 0.40787 0.40564 0.4038 0.40228 0.40118 0.40048 0.40014 0.40019 0.40065 0.40147 0.40275 0.40439 0.40647 0.40895 0.41174 0.41491 0.41827 0.42199 0.42584 0.4299 0.43406 0.4383 0.44266 0.44702 0.45141 0.45572 0.46003 0.46418 0.46822 0.4721 0.47582 0.47939 0.48275 0.48603 0.48908 0.49208 0.49487 0.49753 0.50003 0.50238 0.50453 0.50653 0.50842 0.51015 0.51172 0.51311 0.51439 0.51553 0.51656 0.51741 0.51812 0.51867 0.51908 0.51928 0.51934 0.51921 0.51895 0.51854 0.51797 0.51722 0.51633 0.51526 0.514 0.51255 0.51091 0.5091 0.50716 0.5051 0.50303 0.50091 0.49882 0.49671 0.49459 0.4924 0.49013 0.48775 0.48535 0.48281 0.48027 0.4777 0.47512 0.47254 0.47003 0.46753 0.46501 0.46252 0.45998 0.45747 0.4549 0.45235 0.44979 0.44728 0.44477 0.44232 0.4399 0.43755 0.43525 0.433 0.43081 0.42865 0.42655 0.42448 0.42248 0.42047 0.41858 0.41669 0.41494 0.41328 0.41173 0.41029 0.40906 0.40799 0.40715 0.4066 0.40634 0.40644 0.40699 0.40798 0.40941 0.41134 0.41378 0.41678 0.42038 0.42448 0.42916 0.43422 0.43972 0.44557 0.45171 0.45795 0.46436 0.47069 0.47709 0.48338 0.48967 0.49593 0.50222 0.5086 0.51495 0.5212 0.52706 0.5322 0.53616 0.53896 0.54038 0.54089 0.54081 0.54062 0.54074 0.5414 0.54279 0.54482 0.54735 0.55007 0.55267 0.5548 0.55624 0.55698 0.55717 0.55696 0.55658 0.55614 0.55559 0.55493 0.55413 0.5532 0.55223 0.5513 0.55047 0.54983 0.54939 0.54909 0.54882 0.54835 0.54758 0.5464 0.54488 0.54319 0.54158 0.54028 0.53936 0.53888 0.53865 0.53865 0.53867 0.53871 0.53871 0.53867 0.53856 0.53841 0.53815 0.53795 0.53779 0.53775 0.53787 0.53819 0.5388 0.53966 0.54086 0.54242 0.54439 0.54672 0.54939 0.55234 0.55553 0.55895 0.56245 0.56606 0.56971 0.57345 0.57708 0.58076 0.58444 0.58813 0.59181 0.59555 0.59938 0.60337 0.60737 0.61161 0.61577 0.62009 0.6244 0.62879 0.633 0.63722 0.64118 0.64503 0.6489 0.65266 0.6563 0.65988 0.6634 0.66678 0.67012 0.67328 0.67638 0.67924 0.68192 0.68425 0.68646 0.68831 0.68997 0.69134 0.69225 0.6929 0.69332 0.69342 0.69324 0.69284 0.69231
-0.0074704 -0.0075504 -0.0076188 -0.0076665 -0.0076179 -0.0075606 -0.0074225 -0.0071938 -0.0068314 -0.0063353 -0.0056432 -0.0047887 -0.0036552 -0.0022417 -0.0005 0.0015819 0.0039897 0.0067271 0.0098649 0.013224 0.01685 0.020753 0.02482 0.02907 0.03336 0.037708 0.042136 0.046441 0.050648 0.054796 0.058773 0.062561 0.066142 0.069525 0.072803 0.075875 0.078833 0.081762 0.084616 0.08747 0.090292 0.093038 0.095764 0.098316 0.10072 0.10293 0.10486 0.10649 0.10786 0.10888 0.10962 0.11001 0.1101 0.10983 0.10923 0.10827 0.107 0.10541 0.10351 0.10142 0.099202 0.096845 0.094494 0.092166 0.089888 0.087744 0.085687 0.083817 0.082093 0.0805 0.07909 0.077826 0.076697 0.07572 0.074841 0.074087 0.07342 0.072826 0.072303 0.071822 0.07138 0.070968 0.070569 0.070181 0.06979 0.069372 0.068941 0.068472 0.067967 0.06744 0.066876 0.066308 0.06573 0.065165 0.064634 0.064157 0.063728 0.06338 0.063105 0.062951 0.062882 0.062936 0.063104 0.063414 0.06386 0.064452 0.065218 0.066137 0.067228 0.068517 0.069992 0.071688 0.073565 0.075636 0.077972 0.080467 0.083179 0.086072 0.089122 0.092366 0.095711 0.099142 0.10274 0.10634 0.11001 0.11367 0.11728 0.12093 0.12444 0.12783 0.13116 0.13431 0.13738 0.14031 0.14314 0.14597 0.14869 0.15141 0.15418 0.15707 0.16026 0.16375 0.16761 0.17203 0.17684 0.18222 0.18807 0.19442 0.20145 0.20893 0.21703 0.22575 0.23494 0.24472 0.25476 0.26503 0.2757 0.28622 0.29679 0.30712 0.31714 0.32695 0.33617 0.34483 0.353 0.36038 0.36725 0.37321 0.37852 0.38318 0.38717 0.3906 0.39349 0.39592 0.398 0.39975 0.40118 0.40241 0.40339 0.40422 0.40487 0.40535 0.40565 0.4058 0.40576 0.40554 0.40516 0.4046 0.40391 0.40309 0.40218 0.4012 0.40012 0.39896 0.39772 0.39647 0.39512 0.39373 0.3923 0.39081 0.38926 0.38778 0.38614 0.38455 0.38297 0.38134 0.37974 0.37816 0.37663 0.37515 0.3737 0.37231 0.37102 0.36979 0.36861 0.36754 0.36657 0.36571 0.36491 0.36418 0.36351 0.36293 0.36239 0.36188 0.36141 0.36097 0.36055 0.36014 0.35976 0.35938 0.35899 0.3586 0.35818 0.35771 0.3572 0.35661 0.35595 0.35519 0.35433 0.35337 0.35228 0.35108 0.34978 0.3483 0.34673 0.34502 0.34319 0.34126 0.33917 0.33705 0.33482 0.33254 0.33024 0.32786 0.3255 0.32311 0.32074 0.31839 0.31604 0.31374 0.31145 0.3092 0.307 0.3048 0.30269 0.3006 0.29856 0.29658 0.29463 0.29276 0.29095 0.28921 0.28756 0.28598 0.28451 0.28316 0.28194 0.28086 0.27995 0.27921 0.27861 0.27815 0.27783 0.27767 0.27768 0.27792 0.27846 0.27933 0.28063 0.2823 0.28444 0.287 0.28994 0.29332 0.29691 0.30068 0.30437 0.30796 0.31134 0.31438 0.31711 0.31936 0.32122 0.3227 0.32381 0.32472 0.32546 0.32613 0.32678 0.3274 0.32801 0.32856 0.32899 0.32931 0.32946 0.32944 0.32933 0.3292 0.32918 0.32932 0.32972 0.33032 0.33112 0.33201 0.33292 0.33381 0.3346 0.33529 0.33588 0.33635 0.33671 0.33694 0.33707 0.33711 0.33709 0.33702 0.33691 0.33671 0.33641 0.33592 0.33524 0.33436 0.33332 0.3321 0.33068 0.32915 0.3275 0.3258 0.32406 0.32227 0.32052 0.31881 0.31715 0.3156 0.31412 0.31274 0.31144 0.31022 0.30905 0.30788 0.30669 0.30541 0.30407 0.30265 0.30118 0.29964 0.298 0.29644 0.29473 0.29302 0.29131 0.28966 0.2882 0.28691 0.28586 0.28509 0.28467 0.28456 0.28478 0.28538 0.28634 0.28769 0.28943 0.29162 0.29426 0.29756 0.30144 0.30603 0.31135 0.31751 0.32458 0.33257 0.34188 0.35224 0.36387 0.37667 0.3905 0.4053 0.42078 0.43706 0.45342 0.46991 0.48599 0.50142 0.51621 0.52982 0.54264 0.55427 0.56485 0.57432 0.58268 0.59009 0.59618 0.60122 0.60502 0.60761 0.60898 0.60925 0.60848 0.60666 0.60406 0.60083 0.59705 0.59293 0.58859 0.58405 0.57945 0.57477 0.57011 0.56546 0.56087 0.55635 0.55184 0.54742 0.54298 0.53863 0.53424 0.52991 0.52561 0.52131 0.51712 0.51286 0.50875 0.50469 0.50078 0.49704 0.49349 0.49017 0.4871 0.48435 0.4819 0.47983 0.4781 0.47681 0.47595 0.47549 0.47543 0.47586 0.4767 0.47802 0.47976 0.48193 0.48454 0.48751 0.49087 0.49447 0.49841 0.50249 0.50681 0.51118 0.51572 0.52029 0.52485 0.52947 0.53396 0.53844 0.54271 0.54685 0.55072 0.55444 0.55791 0.56117 0.56429 0.56718 0.56996 0.57254 0.57499 0.5773 0.57947 0.5815 0.58337 0.58515 0.58674 0.58821 0.58954 0.59078 0.5919 0.59287 0.59373 0.59446 0.59503 0.59544 0.59571 0.59582 0.59576 0.59558 0.59521 0.59468 0.59401 0.59315 0.59212 0.59089 0.5895 0.5879 0.5861 0.58417 0.58219 0.5802 0.57824 0.5763 0.57435 0.57239 0.57034 0.56822 0.56595 0.56363 0.56122 0.55883 0.55638 0.55394 0.55151 0.54909 0.54669 0.54423 0.54181 0.53933 0.53682 0.53424 0.53166 0.52906 0.52646 0.52389 0.52134 0.51885 0.51641 0.51401 0.51168 0.50942 0.50718 0.50498 0.50285 0.5007 0.49857 0.49656 0.49458 0.49271 0.49091 0.48925 0.48771 0.48637 0.48522 0.48436 0.48383 0.48362 0.48386 0.4846 0.48581 0.48759 0.48985 0.49274 0.49619 0.50027 0.50482 0.50999 0.51556 0.52157 0.52787 0.53441 0.54105 0.54779 0.55445 0.56108 0.56758 0.57404 0.58049 0.58689 0.59333 0.59973 0.60599 0.61173 0.61683 0.62093 0.62381 0.62547 0.62628 0.62657 0.62678 0.62731 0.62839 0.63013 0.63254 0.63533 0.63827 0.64089 0.64298 0.64421 0.64455 0.64444 0.64401 0.6434 0.6428 0.6422 0.6416 0.64086 0.64007 0.63926 0.63858 0.63797 0.63765 0.63749 0.63752 0.63754 0.63733 0.63677 0.63562 0.63399 0.63211 0.63036 0.62884 0.62779 0.62714 0.62682 0.62674 0.62676 0.62679 0.62672 0.62667 0.62653 0.62639 0.62617 0.62597 0.62577 0.62574 0.62587 0.62621 0.62675 0.62762 0.62877 0.63027 0.63214 0.63435 0.63686 0.63979 0.6428 0.64614 0.64949 0.65297 0.65653 0.6601 0.66367 0.66735 0.67089 0.67458 0.67815 0.68188 0.68563 0.68957 0.69358 0.69779 0.70202 0.70639 0.71074 0.7151 0.71932 0.72356 0.72758 0.7316 0.73545 0.73921 0.74288 0.74641 0.74987 0.75321 0.75653 0.75962 0.7626 0.76538 0.768 0.77039 0.77252 0.77445 0.77599 0.77723 0.77824 0.77895 0.77941 0.77951 0.7795 0.77903 0.7784
-0.007647 -0.0077227 -0.0077926 -0.0078309 -0.0077976 -0.0077354 -0.0076056 -0.0073673 -0.0070138 -0.0065209 -0.0058325 -0.0049803 -0.0038399 -0.0024164 -0.0006589 0.0014311 0.0038699 0.0066595 0.0098409 0.013267 0.016968 0.020941 0.025101 0.029431 0.033808 0.038253 0.042781 0.047169 0.051472 0.055715 0.059789 0.063673 0.067345 0.070828 0.074218 0.077395 0.08046 0.083494 0.086455 0.089411 0.092334 0.095177 0.097992 0.10064 0.10312 0.10539 0.10738 0.10906 0.11046 0.11152 0.11227 0.11265 0.11273 0.11243 0.1118 0.11079 0.10946 0.10781 0.10586 0.10372 0.10144 0.099027 0.096629 0.094247 0.091931 0.089741 0.08764 0.085734 0.083978 0.082353 0.080918 0.079635 0.078488 0.0775 0.076608 0.075853 0.075185 0.074585 0.074058 0.073585 0.07314 0.072724 0.072326 0.071934 0.071528 0.071112 0.07068 0.070202 0.069693 0.069157 0.068583 0.068 0.067416 0.066833 0.066285 0.065791 0.065349 0.064993 0.064711 0.064543 0.064476 0.064525 0.064695 0.065016 0.065464 0.06607 0.06685 0.067791 0.068912 0.070228 0.071735 0.073471 0.075389 0.07751 0.079906 0.082458 0.085228 0.088195 0.091319 0.094646 0.09807 0.10158 0.10526 0.10895 0.1127 0.11645 0.12015 0.12389 0.12748 0.13096 0.13437 0.1376 0.14076 0.14377 0.14669 0.14959 0.15238 0.1552 0.15806 0.16106 0.16434 0.16793 0.17188 0.17641 0.18135 0.18688 0.19288 0.1994 0.20663 0.21433 0.22266 0.2316 0.24104 0.25111 0.26142 0.27198 0.28294 0.29376 0.30463 0.31527 0.32558 0.33571 0.34521 0.35416 0.3626 0.37023 0.37732 0.3835 0.389 0.39383 0.39795 0.4015 0.40448 0.40701 0.40916 0.41095 0.41245 0.41372 0.41473 0.4156 0.41629 0.4168 0.41714 0.4173 0.41729 0.4171 0.41675 0.4162 0.41552 0.41471 0.41378 0.41279 0.41168 0.41049 0.40925 0.40797 0.40659 0.40517 0.40368 0.40216 0.40056 0.39906 0.39742 0.39582 0.39424 0.39262 0.39104 0.38948 0.38797 0.38649 0.38505 0.38369 0.3824 0.38116 0.37997 0.37891 0.37796 0.37709 0.37628 0.37555 0.37487 0.37428 0.37371 0.3732 0.37272 0.37227 0.37184 0.37144 0.37105 0.37066 0.37028 0.36989 0.36947 0.369 0.36848 0.36788 0.3672 0.36644 0.36553 0.36454 0.36342 0.36219 0.36084 0.35933 0.3577 0.35595 0.35406 0.35208 0.34993 0.34773 0.34541 0.34306 0.34068 0.33821 0.33578 0.33331 0.33086 0.32843 0.32599 0.32361 0.32124 0.3189 0.31663 0.31436 0.31215 0.30999 0.30787 0.30582 0.30379 0.30184 0.29996 0.29814 0.29641 0.29475 0.29319 0.29177 0.29046 0.28931 0.2883 0.28746 0.28677 0.28623 0.28583 0.28561 0.28557 0.28579 0.28632 0.28719 0.28853 0.29026 0.29249 0.29515 0.29823 0.30178 0.30552 0.30944 0.31332 0.31703 0.32054 0.32366 0.32645 0.32874 0.33061 0.33208 0.33317 0.33404 0.33474 0.33537 0.33596 0.33656 0.33716 0.33772 0.3382 0.33857 0.3388 0.33886 0.33885 0.33882 0.3389 0.33915 0.33964 0.34033 0.3412 0.34214 0.34311 0.34405 0.34485 0.34555 0.34613 0.3466 0.34696 0.34719 0.34732 0.34738 0.34737 0.34732 0.34724 0.34705 0.34675 0.34625 0.34555 0.34463 0.34351 0.34222 0.34074 0.33913 0.3374 0.3356 0.33378 0.3319 0.33006 0.32826 0.32654 0.3249 0.32337 0.32194 0.3206 0.31934 0.31812 0.31691 0.31566 0.31435 0.31297 0.31149 0.30996 0.30835 0.30666 0.30503 0.30325 0.30146 0.2997 0.298 0.29646 0.29513 0.29404 0.29325 0.2928 0.29267 0.2929 0.2935 0.29451 0.2959 0.29773 0.29998 0.30272 0.30611 0.31011 0.31487 0.32035 0.3267 0.33399 0.3422 0.35179 0.36241 0.37436 0.38751 0.40165 0.41682 0.43266 0.4493 0.466 0.48281 0.49924 0.51501 0.53016 0.54409 0.55722 0.56915 0.58001 0.58978 0.59842 0.60606 0.6124 0.61766 0.62167 0.62443 0.62595 0.62633 0.62563 0.62385 0.62126 0.61804 0.61427 0.61013 0.60572 0.60117 0.59652 0.59179 0.58708 0.58236 0.57772 0.57314 0.56854 0.56407 0.55959 0.55517 0.55073 0.54633 0.54196 0.53758 0.53329 0.52897 0.52479 0.52065 0.51665 0.51283 0.50919 0.50579 0.50261 0.49981 0.49728 0.49515 0.49339 0.49207 0.4912 0.49071 0.49067 0.49109 0.49193 0.49325 0.49502 0.49721 0.49988 0.50289 0.50631 0.50997 0.51402 0.51819 0.52261 0.52711 0.53175 0.53641 0.54111 0.54585 0.5505 0.55506 0.55944 0.56369 0.56769 0.57147 0.57506 0.57841 0.58162 0.58455 0.58742 0.59008 0.59261 0.59498 0.59722 0.59931 0.60125 0.60306 0.60472 0.60628 0.60764 0.60889 0.61004 0.61108 0.61197 0.6127 0.61329 0.61372 0.61402 0.61413 0.61407 0.61387 0.61348 0.61293 0.61226 0.61138 0.61033 0.60907 0.60763 0.60595 0.60417 0.60219 0.60019 0.59812 0.59606 0.59409 0.59211 0.5901 0.58802 0.58586 0.5836 0.58122 0.57878 0.57635 0.57387 0.5714 0.56892 0.56647 0.564 0.56152 0.559 0.55644 0.55385 0.5512 0.54856 0.54588 0.54324 0.54057 0.53797 0.5354 0.53289 0.53045 0.52806 0.52572 0.5234 0.52115 0.51892 0.51673 0.51452 0.5124 0.51033 0.50837 0.50646 0.50469 0.50301 0.50156 0.50028 0.49932 0.49866 0.49836 0.49848 0.49907 0.50014 0.50179 0.50399 0.50685 0.51019 0.51424 0.51882 0.52403 0.52965 0.53581 0.54227 0.54905 0.55594 0.56291 0.5698 0.57672 0.58346 0.59025 0.59694 0.60368 0.61043 0.61713 0.62372 0.62983 0.63526 0.63954 0.64259 0.64447 0.64521 0.64545 0.64563 0.64611 0.64723 0.649 0.65145 0.65427 0.6573 0.65997 0.66208 0.66328 0.66373 0.66355 0.66302 0.66234 0.66169 0.66103 0.66033 0.65958 0.6587 0.65785 0.65706 0.65644 0.65603 0.6558 0.65581 0.65586 0.65565 0.65502 0.65383 0.65214 0.65027 0.64842 0.6469 0.64583 0.64522 0.64497 0.64495 0.64499 0.64509 0.64512 0.64504 0.64494 0.64479 0.64458 0.64433 0.64417 0.64419 0.64432 0.64467 0.64529 0.64616 0.64743 0.64913 0.65108 0.65346 0.65617 0.65914 0.66238 0.6658 0.6694 0.67309 0.67678 0.68048 0.68418 0.68792 0.6915 0.69525 0.69893 0.7027 0.70652 0.71051 0.71462 0.71885 0.7232 0.72767 0.73206 0.73653 0.74077 0.74498 0.74906 0.75304 0.75681 0.7606 0.7643 0.76789 0.77134 0.77463 0.77781 0.78091 0.78386 0.78673 0.78929 0.79176 0.7939 0.79575 0.79731 0.79856 0.79962 0.80033 0.8007 0.80077 0.80053 0.80024 0.79961
-0.014076 -0.014141 -0.014199 -0.014229 -0.0142 -0.014146 -0.014026 -0.013821 -0.013501 -0.013058 -0.012438 -0.011664 -0.010649 -0.0093825 -0.0078181 -0.0059566 -0.0037915 -0.0013303 0.0014734 0.0044774 0.0077225 0.011209 0.014841 0.018622 0.022441 0.026324 0.030278 0.034113 0.037879 0.041604 0.045183 0.048606 0.051849 0.054923 0.057918 0.060735 0.063451 0.066142 0.068771 0.07139 0.073975 0.076505 0.078997 0.081339 0.083538 0.085548 0.087298 0.088781 0.090024 0.090936 0.091593 0.091923 0.091987 0.091724 0.091167 0.090278 0.089111 0.087663 0.085953 0.084075 0.082074 0.079959 0.077848 0.075759 0.073725 0.0718 0.069952 0.06827 0.066717 0.065288 0.064023 0.062886 0.061874 0.061002 0.060218 0.059549 0.05896 0.058431 0.057967 0.057558 0.057168 0.056807 0.056465 0.056122 0.055778 0.055413 0.055032 0.054618 0.054166 0.053692 0.053175 0.052652 0.05213 0.051606 0.051108 0.050663 0.050256 0.049927 0.049665 0.0495 0.049419 0.049446 0.049578 0.049841 0.050226 0.05074 0.051411 0.052227 0.053196 0.054341 0.055655 0.057165 0.058843 0.060691 0.062786 0.065029 0.067462 0.070064 0.072817 0.075755 0.078774 0.081873 0.085138 0.088399 0.091724 0.095049 0.098334 0.10164 0.10482 0.10789 0.11091 0.11377 0.11656 0.11921 0.12178 0.12434 0.1268 0.12926 0.13176 0.13436 0.1372 0.1403 0.14371 0.1476 0.15184 0.15662 0.16184 0.1675 0.1738 0.1805 0.18777 0.19559 0.20384 0.21267 0.22174 0.23102 0.24066 0.25021 0.25982 0.26922 0.27835 0.28734 0.29578 0.30374 0.31124 0.31804 0.32436 0.32987 0.33478 0.3391 0.3428 0.34598 0.34868 0.35096 0.35291 0.35454 0.35591 0.35707 0.35802 0.35883 0.35946 0.35995 0.36028 0.36047 0.36049 0.36034 0.36006 0.35962 0.35908 0.35841 0.35766 0.35684 0.35593 0.35494 0.35392 0.35282 0.35166 0.3504 0.34911 0.34779 0.34641 0.34511 0.34366 0.34224 0.34083 0.33936 0.33795 0.33653 0.33518 0.33385 0.33254 0.33132 0.33015 0.32902 0.32793 0.327 0.32614 0.32539 0.32467 0.32402 0.32341 0.32288 0.32237 0.32192 0.32148 0.32107 0.32069 0.32033 0.31999 0.31965 0.31932 0.31898 0.31861 0.31821 0.31775 0.31723 0.31663 0.31596 0.31515 0.31427 0.31328 0.31218 0.31098 0.30961 0.30816 0.30657 0.30487 0.30307 0.30113 0.29914 0.29705 0.29493 0.29277 0.29054 0.28834 0.28612 0.2839 0.28171 0.27951 0.27736 0.27523 0.27314 0.27109 0.26903 0.26706 0.2651 0.26319 0.26134 0.25951 0.25775 0.25606 0.25442 0.25287 0.25137 0.24997 0.24868 0.24751 0.24647 0.24556 0.2448 0.24417 0.24368 0.24332 0.24311 0.24308 0.24327 0.24373 0.24449 0.24566 0.24718 0.24912 0.25145 0.25414 0.25724 0.26052 0.26395 0.26731 0.27053 0.27355 0.27621 0.27857 0.28046 0.28198 0.28317 0.28402 0.2847 0.28522 0.28572 0.28619 0.28668 0.28718 0.28766 0.28806 0.28839 0.28862 0.28875 0.2888 0.28885 0.28897 0.28924 0.2897 0.29032 0.29108 0.2919 0.29272 0.29349 0.29416 0.29473 0.29518 0.29555 0.29583 0.29603 0.29616 0.29622 0.29623 0.29622 0.29618 0.29604 0.29579 0.29536 0.29474 0.29393 0.29296 0.29181 0.2905 0.28907 0.28754 0.28596 0.28434 0.28268 0.28107 0.27948 0.27796 0.27652 0.27517 0.27392 0.27274 0.27165 0.27058 0.26952 0.26843 0.26729 0.26608 0.26477 0.26341 0.26198 0.26048 0.25904 0.25744 0.25583 0.25425 0.25273 0.25135 0.25015 0.24917 0.24843 0.24803 0.2479 0.24807 0.24859 0.24944 0.25063 0.2522 0.25414 0.25647 0.25938 0.26283 0.26692 0.2717 0.27721 0.28353 0.29071 0.29908 0.3084 0.31887 0.33041 0.34287 0.35627 0.37024 0.38498 0.39979 0.41482 0.42953 0.44373 0.45739 0.46998 0.4819 0.49278 0.50275 0.5117 0.51966 0.52675 0.53263 0.53753 0.54125 0.5438 0.5452 0.54552 0.54479 0.54311 0.54065 0.53761 0.53402 0.53013 0.52601 0.52175 0.51744 0.51303 0.50868 0.50434 0.50008 0.49586 0.49166 0.48757 0.48344 0.4794 0.47537 0.47137 0.46739 0.46343 0.45953 0.4556 0.4518 0.44806 0.44448 0.44102 0.43775 0.4347 0.43186 0.42935 0.42711 0.42523 0.42368 0.42255 0.42179 0.42141 0.42142 0.42187 0.42269 0.42397 0.42562 0.42769 0.43016 0.43294 0.43609 0.43951 0.44322 0.44708 0.45114 0.45534 0.4596 0.46395 0.46829 0.47268 0.47695 0.4812 0.48529 0.48925 0.49299 0.49653 0.49987 0.50299 0.506 0.50877 0.51147 0.51398 0.51637 0.51865 0.52074 0.52275 0.52459 0.52633 0.52794 0.52943 0.53074 0.53196 0.53306 0.53402 0.53487 0.53561 0.53617 0.5366 0.53691 0.53703 0.537 0.5368 0.53647 0.53598 0.53536 0.53457 0.53361 0.53246 0.53115 0.52965 0.52802 0.52619 0.52436 0.52248 0.52056 0.51869 0.51683 0.51492 0.51293 0.5109 0.50875 0.50657 0.5043 0.50203 0.49973 0.49744 0.49514 0.49285 0.49057 0.48828 0.48597 0.48361 0.48123 0.47877 0.47633 0.47385 0.47142 0.46899 0.4666 0.46425 0.4619 0.45965 0.45746 0.45531 0.45318 0.4511 0.44906 0.44706 0.44504 0.4431 0.44121 0.43941 0.43767 0.43606 0.43459 0.43328 0.43213 0.43122 0.43057 0.43027 0.43034 0.43081 0.43175 0.43319 0.43507 0.43755 0.44051 0.44407 0.4481 0.45274 0.45774 0.46325 0.46901 0.47509 0.48137 0.4877 0.49399 0.50028 0.50647 0.51262 0.51873 0.52484 0.53104 0.53727 0.54343 0.54911 0.55416 0.55806 0.56078 0.56225 0.56274 0.56266 0.56246 0.56255 0.56315 0.56447 0.56637 0.56875 0.57133 0.57375 0.57572 0.57705 0.57769 0.57786 0.57767 0.57726 0.5768 0.57625 0.57563 0.57485 0.57397 0.57307 0.57218 0.57142 0.57084 0.57043 0.57014 0.56989 0.56942 0.56867 0.56752 0.56605 0.56438 0.56284 0.56153 0.56062 0.5601 0.55984 0.55975 0.55974 0.5598 0.5598 0.5597 0.55957 0.55942 0.55912 0.55883 0.55861 0.55859 0.55866 0.559 0.55959 0.5604 0.56153 0.56302 0.56488 0.56707 0.56958 0.57243 0.57552 0.57875 0.58214 0.58557 0.58905 0.59263 0.5961 0.59971 0.60325 0.60676 0.61023 0.61388 0.61751 0.62129 0.62514 0.6292 0.63333 0.63756 0.64178 0.64603 0.65019 0.65424 0.65811 0.66199 0.66565 0.66931 0.67283 0.67629 0.67958 0.68288 0.686 0.68899 0.69184 0.6945 0.69704 0.69932 0.70135 0.70309 0.70458 0.70578 0.70671 0.70742 0.70775 0.7079 0.70771 0.70732 0.70676
-0.013715 -0.013782 -0.013852 -0.013885 -0.01386 -0.013803 -0.0137 -0.013486 -0.013168 -0.012722 -0.0121 -0.011314 -0.010282 -0.0089813 -0.0073743 -0.00546 -0.0032252 -0.0006855 0.0022146 0.0053244 0.0086904 0.012302 0.01607 0.020001 0.023966 0.02799 0.03209 0.036068 0.039974 0.043835 0.047545 0.051094 0.054455 0.057646 0.060763 0.063695 0.066517 0.06932 0.072061 0.074787 0.077471 0.080093 0.082689 0.085114 0.087393 0.089478 0.091288 0.09282 0.094096 0.095043 0.095715 0.096043 0.096093 0.095804 0.095212 0.094282 0.093064 0.091552 0.089772 0.087818 0.085744 0.083553 0.081369 0.079209 0.077094 0.075098 0.073185 0.071443 0.069841 0.068349 0.067043 0.065859 0.064808 0.063907 0.063095 0.062403 0.061791 0.061246 0.06077 0.060341 0.059938 0.059562 0.059208 0.058852 0.058498 0.058118 0.057722 0.057286 0.05682 0.056328 0.055796 0.055255 0.054718 0.05417 0.053661 0.053196 0.052776 0.052434 0.052161 0.051992 0.051909 0.05194 0.052074 0.052352 0.052746 0.053284 0.053982 0.054824 0.055829 0.057017 0.058381 0.059945 0.061685 0.063608 0.065783 0.068102 0.07063 0.073332 0.076186 0.079229 0.082364 0.085575 0.08896 0.092339 0.09579 0.099239 0.10264 0.10608 0.10938 0.11259 0.11572 0.11869 0.12159 0.12435 0.12702 0.12969 0.13226 0.13482 0.13743 0.14014 0.1431 0.14631 0.1498 0.15386 0.15831 0.16328 0.1687 0.17459 0.18114 0.18812 0.19567 0.20379 0.2124 0.22158 0.231 0.24066 0.2507 0.26064 0.27063 0.28043 0.28993 0.29927 0.30804 0.31631 0.32408 0.33114 0.33768 0.34337 0.34845 0.35292 0.35674 0.36001 0.36277 0.36512 0.36711 0.36878 0.37018 0.37137 0.37233 0.37314 0.37377 0.37425 0.3746 0.37476 0.37477 0.37461 0.3743 0.37384 0.37324 0.37254 0.37173 0.37086 0.36991 0.36887 0.36777 0.36663 0.36535 0.36405 0.36271 0.36133 0.35988 0.35852 0.35702 0.35556 0.3541 0.35262 0.35119 0.34976 0.34837 0.34703 0.34571 0.34443 0.34325 0.34211 0.34101 0.34003 0.33915 0.33836 0.33765 0.33701 0.33639 0.33585 0.33532 0.33485 0.33439 0.33398 0.33359 0.3332 0.33285 0.3325 0.33215 0.33181 0.33143 0.33101 0.33054 0.33001 0.32938 0.32868 0.32786 0.32696 0.32593 0.32479 0.32354 0.32214 0.32064 0.31899 0.31724 0.31538 0.31338 0.31132 0.30917 0.30698 0.30474 0.30245 0.30017 0.29787 0.29559 0.29332 0.29104 0.28881 0.28662 0.28445 0.28234 0.28023 0.27818 0.27617 0.27419 0.27229 0.2704 0.26858 0.26683 0.26514 0.26353 0.26198 0.26053 0.25919 0.25797 0.2569 0.25595 0.25517 0.25452 0.25402 0.25365 0.25343 0.2534 0.25362 0.25411 0.25492 0.25615 0.25774 0.25978 0.26221 0.26504 0.26828 0.2717 0.27526 0.27874 0.28209 0.2852 0.28793 0.29035 0.29227 0.29381 0.29499 0.29584 0.2965 0.29703 0.29752 0.29801 0.29852 0.29904 0.29954 0.29998 0.30036 0.30064 0.30081 0.30091 0.30102 0.30122 0.30154 0.30206 0.30273 0.30354 0.30439 0.30523 0.306 0.30668 0.30724 0.3077 0.30806 0.30833 0.30852 0.30865 0.30872 0.30876 0.30876 0.30873 0.30862 0.30838 0.30795 0.30734 0.30651 0.3055 0.30432 0.30296 0.30148 0.2999 0.29824 0.29656 0.29484 0.29317 0.29151 0.28994 0.28844 0.28703 0.28574 0.28452 0.28337 0.28226 0.28115 0.28003 0.27885 0.27759 0.27624 0.27482 0.27334 0.27178 0.27028 0.26861 0.26694 0.2653 0.26372 0.26229 0.26104 0.26003 0.25926 0.25883 0.25869 0.25886 0.25941 0.26031 0.26155 0.26319 0.26521 0.26763 0.27066 0.27425 0.27852 0.2835 0.28927 0.29589 0.30336 0.31208 0.32177 0.33265 0.34463 0.35757 0.37142 0.3859 0.40109 0.41638 0.4318 0.44687 0.46136 0.47524 0.48812 0.5002 0.51123 0.52127 0.5303 0.53831 0.54543 0.55132 0.55623 0.55995 0.5625 0.56386 0.56415 0.56343 0.56172 0.55924 0.5562 0.5526 0.54873 0.54461 0.54029 0.53596 0.53155 0.52718 0.52281 0.51853 0.51428 0.51008 0.50593 0.50178 0.49773 0.49364 0.48961 0.4856 0.48158 0.47763 0.47365 0.4698 0.46599 0.46231 0.4588 0.45547 0.45236 0.44946 0.44691 0.44462 0.44269 0.4411 0.43996 0.43922 0.43884 0.43888 0.43935 0.44024 0.44157 0.44329 0.44543 0.44799 0.45087 0.45412 0.45764 0.46148 0.46545 0.46964 0.47391 0.47829 0.48275 0.48719 0.49167 0.49603 0.50038 0.50452 0.50854 0.51233 0.51592 0.51928 0.52246 0.52553 0.52831 0.53102 0.53353 0.53592 0.53818 0.54034 0.54231 0.54416 0.54591 0.54749 0.54897 0.55031 0.55155 0.55264 0.55363 0.55449 0.55519 0.55579 0.55624 0.55653 0.55667 0.55666 0.55649 0.55615 0.55566 0.55505 0.55427 0.5533 0.55215 0.55086 0.54937 0.54771 0.54592 0.54405 0.54218 0.54027 0.53841 0.53652 0.53465 0.5327 0.53069 0.52857 0.52643 0.52417 0.52193 0.51966 0.51739 0.51512 0.51283 0.51054 0.50823 0.50592 0.50356 0.50116 0.49872 0.49626 0.49376 0.49132 0.48887 0.48647 0.48408 0.48177 0.47948 0.47727 0.47512 0.47297 0.47086 0.4688 0.46676 0.46473 0.46275 0.46082 0.45897 0.4572 0.45554 0.454 0.45267 0.45147 0.45051 0.44988 0.44956 0.44963 0.45015 0.4511 0.45257 0.45453 0.45705 0.46009 0.46373 0.46785 0.47257 0.47771 0.48336 0.48926 0.49547 0.50178 0.50824 0.51464 0.52101 0.52718 0.53336 0.53953 0.54569 0.55193 0.55814 0.56433 0.57005 0.5751 0.579 0.58168 0.58314 0.58365 0.58354 0.58333 0.5834 0.584 0.58525 0.58716 0.58947 0.59197 0.59438 0.5964 0.59772 0.59845 0.59867 0.59851 0.59819 0.5978 0.5973 0.59668 0.59596 0.59515 0.59424 0.59341 0.59261 0.59203 0.59159 0.59127 0.59096 0.59049 0.58974 0.58858 0.58715 0.58555 0.58401 0.58275 0.58186 0.58136 0.58111 0.58108 0.58109 0.5811 0.58107 0.58098 0.58085 0.58065 0.58041 0.58009 0.57991 0.57987 0.57999 0.58031 0.5809 0.58174 0.58287 0.58441 0.58631 0.58851 0.59101 0.59389 0.59696 0.60023 0.60363 0.60706 0.61059 0.61418 0.61765 0.62119 0.6247 0.62822 0.6317 0.63529 0.63889 0.64272 0.64665 0.6507 0.65484 0.65909 0.66323 0.66751 0.67158 0.6756 0.67941 0.68326 0.68688 0.69049 0.69394 0.69734 0.7006 0.70387 0.70691 0.70985 0.71273 0.7154 0.71786 0.72004 0.72201 0.72376 0.72518 0.72638 0.72732 0.72799 0.72843 0.72854 0.72841 0.72803 0.72746
-0.015403 -0.01547 -0.015541 -0.015583 -0.015562 -0.015499 -0.015392 -0.015177 -0.014854 -0.014389 -0.013747 -0.012951 -0.011892 -0.01057 -0.0089428 -0.0069958 -0.0047369 -0.0021732 0.0007537 0.0038978 0.0072819 0.010914 0.014703 0.018646 0.022627 0.026662 0.030768 0.034757 0.038669 0.042536 0.04625 0.049808 0.053172 0.056362 0.059471 0.062394 0.065213 0.068003 0.070719 0.073426 0.076093 0.078689 0.08125 0.083642 0.08589 0.087941 0.089716 0.091216 0.092464 0.093372 0.094016 0.094325 0.094369 0.09407 0.093471 0.092538 0.091323 0.089814 0.088034 0.086085 0.084014 0.081827 0.079645 0.07748 0.075377 0.073382 0.071474 0.069741 0.06814 0.066663 0.065359 0.064185 0.063138 0.062239 0.061428 0.060738 0.060126 0.05958 0.059103 0.058677 0.058277 0.057912 0.057562 0.057213 0.056864 0.056492 0.056105 0.055682 0.055222 0.054738 0.054225 0.053687 0.053146 0.052612 0.052112 0.051651 0.051242 0.050912 0.050649 0.05049 0.050419 0.050458 0.050606 0.050893 0.051301 0.051846 0.052555 0.053412 0.054428 0.055622 0.056991 0.058567 0.060309 0.062235 0.064412 0.066734 0.069256 0.071961 0.074809 0.077849 0.08097 0.084173 0.087533 0.090896 0.094328 0.097749 0.10113 0.10453 0.1078 0.11097 0.11408 0.11703 0.11991 0.12265 0.1253 0.12795 0.13052 0.13307 0.13567 0.13838 0.14133 0.14452 0.14804 0.15209 0.15648 0.16142 0.16677 0.17259 0.17904 0.18589 0.19331 0.20129 0.20971 0.21868 0.22789 0.2373 0.24709 0.25676 0.26645 0.27595 0.28516 0.29421 0.30271 0.31072 0.31826 0.3251 0.33145 0.33697 0.3419 0.34622 0.34991 0.35309 0.35575 0.358 0.35993 0.36154 0.36289 0.36404 0.36497 0.36577 0.36638 0.36685 0.36717 0.36735 0.36735 0.36718 0.36688 0.36642 0.36585 0.36517 0.36441 0.3636 0.3627 0.36173 0.36073 0.35964 0.35847 0.35725 0.35596 0.35465 0.35324 0.35193 0.35045 0.34899 0.34752 0.34601 0.34454 0.34306 0.34163 0.34023 0.33886 0.33756 0.33635 0.33517 0.33403 0.33303 0.33213 0.33131 0.33057 0.32989 0.32927 0.3287 0.32817 0.32768 0.32722 0.32679 0.32639 0.32601 0.32565 0.32532 0.32496 0.32464 0.32428 0.32387 0.32341 0.32289 0.32231 0.32163 0.32084 0.31996 0.31897 0.31786 0.31666 0.31529 0.31384 0.31226 0.31055 0.30874 0.30682 0.30483 0.30274 0.3006 0.29846 0.29622 0.29402 0.29179 0.28958 0.28738 0.28518 0.28302 0.28088 0.27878 0.27673 0.27467 0.27269 0.27072 0.2688 0.26695 0.26512 0.26335 0.26164 0.25999 0.25842 0.25692 0.2555 0.25421 0.25303 0.25199 0.25107 0.25032 0.24971 0.24922 0.24889 0.2487 0.24868 0.24892 0.24943 0.25025 0.25149 0.25307 0.25509 0.2575 0.26028 0.26346 0.26682 0.27032 0.27374 0.27701 0.28006 0.28276 0.28515 0.28708 0.28864 0.28985 0.29073 0.29145 0.29202 0.29255 0.29306 0.29358 0.29412 0.29463 0.29507 0.29543 0.29566 0.29577 0.29581 0.29583 0.29592 0.29615 0.29658 0.29717 0.2979 0.29868 0.29947 0.30022 0.30086 0.3014 0.30184 0.30218 0.30244 0.30261 0.30271 0.30273 0.30271 0.30266 0.30258 0.3024 0.30213 0.30168 0.30104 0.30021 0.2992 0.29802 0.29669 0.29524 0.29371 0.29211 0.29048 0.28881 0.28718 0.28557 0.28404 0.2826 0.28123 0.27996 0.27877 0.27766 0.27658 0.2755 0.27441 0.27324 0.27202 0.2707 0.26932 0.26789 0.26637 0.26491 0.26329 0.26168 0.26009 0.25856 0.25719 0.25598 0.255 0.25429 0.25388 0.25377 0.25396 0.2545 0.25539 0.25662 0.25822 0.2602 0.26258 0.26555 0.26909 0.27331 0.27817 0.28381 0.29029 0.29761 0.30612 0.31562 0.32624 0.33797 0.35061 0.36417 0.37829 0.39317 0.40813 0.42326 0.43807 0.45232 0.46604 0.47867 0.49066 0.50154 0.51152 0.52048 0.52844 0.5355 0.5414 0.5463 0.55003 0.55257 0.55395 0.55423 0.55352 0.55182 0.54936 0.54632 0.54276 0.53886 0.53473 0.53043 0.52612 0.5217 0.51734 0.51299 0.5087 0.50451 0.50033 0.49623 0.49211 0.48808 0.48404 0.48004 0.47607 0.47207 0.46818 0.46422 0.46041 0.45664 0.45299 0.44952 0.44622 0.44313 0.44024 0.43771 0.43543 0.43351 0.43195 0.43078 0.42999 0.42958 0.42956 0.42995 0.43074 0.43198 0.43358 0.43562 0.43804 0.44082 0.44395 0.44733 0.45103 0.45488 0.45896 0.46311 0.46741 0.47174 0.47606 0.48045 0.48475 0.489 0.49304 0.49696 0.50067 0.50418 0.50747 0.51054 0.5135 0.51621 0.51884 0.52128 0.52361 0.52583 0.52785 0.52977 0.53156 0.53326 0.5348 0.53625 0.53751 0.53868 0.53977 0.54073 0.54154 0.54225 0.54279 0.54319 0.54345 0.54357 0.54354 0.54337 0.54303 0.54256 0.54193 0.54114 0.54019 0.53904 0.53773 0.53626 0.53457 0.5328 0.53097 0.52912 0.52723 0.52537 0.52354 0.52168 0.51975 0.51776 0.51564 0.51348 0.51126 0.50905 0.50677 0.50449 0.50225 0.5 0.49775 0.4955 0.49323 0.4909 0.48855 0.48614 0.4837 0.48124 0.47882 0.4764 0.474 0.47164 0.46934 0.46709 0.46487 0.46272 0.46063 0.45856 0.45652 0.45454 0.45253 0.4506 0.44871 0.4469 0.44516 0.44352 0.44202 0.44067 0.4395 0.43856 0.43793 0.43757 0.43764 0.43811 0.43904 0.44045 0.44234 0.44482 0.44778 0.45137 0.45544 0.46006 0.46512 0.4706 0.47639 0.48254 0.48874 0.49506 0.50134 0.50761 0.51377 0.5199 0.52599 0.53213 0.53832 0.5445 0.55059 0.55628 0.56126 0.5652 0.56792 0.56942 0.56994 0.56995 0.56981 0.56993 0.57062 0.57198 0.57395 0.5764 0.57901 0.58144 0.58341 0.58469 0.58532 0.58536 0.5851 0.5846 0.58405 0.58341 0.58279 0.58198 0.58113 0.58022 0.57938 0.5786 0.57804 0.57763 0.57744 0.57722 0.57689 0.57618 0.57506 0.57354 0.57187 0.57023 0.56889 0.56799 0.56738 0.56706 0.567 0.56698 0.56698 0.56692 0.56683 0.56667 0.56649 0.56619 0.56595 0.56572 0.56567 0.56575 0.56605 0.56665 0.56747 0.5686 0.57011 0.57193 0.57409 0.5766 0.57939 0.58239 0.58565 0.58898 0.59243 0.59585 0.5994 0.60289 0.60637 0.60986 0.61337 0.61684 0.62039 0.62397 0.62777 0.63161 0.63565 0.63976 0.64398 0.64818 0.65243 0.6564 0.66052 0.66433 0.66813 0.67181 0.67544 0.679 0.68236 0.68566 0.68888 0.69202 0.695 0.69782 0.70049 0.70297 0.70519 0.70709 0.70883 0.71019 0.71129 0.71223 0.71289 0.71318 0.71332 0.71314 0.71271 0.71212
-0.012833 -0.012907 -0.012982 -0.013025 -0.012995 -0.012948 -0.012828 -0.012624 -0.012296 -0.011838 -0.011185 -0.010375 -0.0093067 -0.0079675 -0.0063191 -0.0043476 -0.0020689 0.0005292 0.003495 0.006679 0.010112 0.013795 0.017639 0.021636 0.025671 0.029762 0.033926 0.037957 0.041912 0.045818 0.049568 0.053155 0.056551 0.059767 0.06291 0.065862 0.068711 0.071535 0.074301 0.077045 0.079758 0.082399 0.085015 0.087466 0.089772 0.09188 0.093714 0.095267 0.096569 0.097523 0.098209 0.098549 0.098611 0.098335 0.097743 0.096813 0.095594 0.094075 0.092289 0.090318 0.088232 0.086025 0.083829 0.081647 0.079521 0.077517 0.075591 0.073833 0.072216 0.070725 0.069405 0.068224 0.067172 0.066269 0.06545 0.064754 0.064139 0.063592 0.063113 0.062679 0.062279 0.061901 0.06154 0.061184 0.060826 0.060449 0.060054 0.059615 0.059143 0.05865 0.058125 0.057579 0.057035 0.056499 0.055991 0.055531 0.055118 0.054779 0.054515 0.054354 0.054285 0.054337 0.054487 0.054778 0.055193 0.055749 0.056469 0.057337 0.05837 0.059589 0.060973 0.062573 0.064344 0.066293 0.068501 0.070861 0.073422 0.076159 0.079055 0.082135 0.085301 0.088547 0.091959 0.095376 0.098849 0.10232 0.10575 0.10921 0.11253 0.11576 0.11892 0.12192 0.12485 0.12764 0.13034 0.13303 0.13563 0.13822 0.14086 0.14361 0.1466 0.14985 0.15343 0.15758 0.16211 0.1672 0.17272 0.17873 0.18541 0.19251 0.2002 0.20848 0.21723 0.22656 0.23615 0.24596 0.25617 0.26626 0.27642 0.28637 0.29602 0.30552 0.31444 0.32285 0.33077 0.33795 0.34462 0.35042 0.35562 0.36016 0.36404 0.36736 0.37015 0.37251 0.37451 0.3762 0.3776 0.37879 0.37974 0.38056 0.38119 0.38168 0.38201 0.38216 0.38216 0.38196 0.38162 0.38112 0.38049 0.37975 0.37892 0.37801 0.37702 0.37598 0.37487 0.37368 0.37242 0.37112 0.36976 0.36837 0.36691 0.36552 0.36397 0.36244 0.36093 0.35938 0.35786 0.35636 0.35489 0.35346 0.35207 0.35076 0.34951 0.34831 0.34718 0.34615 0.34523 0.3444 0.34366 0.34297 0.34234 0.3418 0.34127 0.34079 0.34032 0.3399 0.33951 0.33914 0.33878 0.33844 0.33809 0.33775 0.33737 0.33694 0.33648 0.33594 0.33532 0.33462 0.33379 0.33287 0.33183 0.33068 0.32942 0.32802 0.32651 0.32486 0.32309 0.32123 0.31922 0.31716 0.315 0.31279 0.31056 0.30824 0.30595 0.30364 0.30133 0.29906 0.29676 0.29452 0.29229 0.29011 0.28798 0.28584 0.28377 0.28173 0.27974 0.2778 0.27589 0.27405 0.27228 0.27057 0.26893 0.26736 0.26589 0.26452 0.26329 0.26217 0.2612 0.26039 0.25972 0.25918 0.25878 0.25855 0.25847 0.25866 0.25914 0.25993 0.26115 0.26273 0.26478 0.26723 0.27007 0.27334 0.27678 0.2804 0.28393 0.28731 0.29048 0.29327 0.29575 0.29775 0.29936 0.30061 0.3015 0.30221 0.30276 0.30327 0.30375 0.30425 0.30477 0.30528 0.30572 0.3061 0.30636 0.30651 0.3066 0.30668 0.30685 0.30717 0.30768 0.30836 0.30919 0.31006 0.31093 0.31175 0.31246 0.31306 0.31355 0.31394 0.31424 0.31444 0.31457 0.31464 0.31465 0.31465 0.31461 0.31446 0.31421 0.31377 0.31313 0.31228 0.31126 0.31007 0.3087 0.3072 0.3056 0.30393 0.30223 0.30049 0.29879 0.29711 0.2955 0.29398 0.29254 0.29122 0.28996 0.2888 0.28766 0.28653 0.28539 0.28417 0.28289 0.28152 0.28009 0.27859 0.277 0.27549 0.27381 0.27214 0.27048 0.2689 0.26747 0.26623 0.26522 0.26448 0.26406 0.26394 0.26415 0.26471 0.26563 0.2669 0.26856 0.27061 0.27308 0.2762 0.27986 0.28424 0.28933 0.2952 0.30196 0.30957 0.31847 0.32833 0.33943 0.35167 0.36488 0.37907 0.39386 0.40944 0.42513 0.44099 0.45652 0.47145 0.48578 0.49904 0.51154 0.52291 0.53333 0.54268 0.55099 0.55832 0.56442 0.56947 0.57334 0.57598 0.57746 0.57777 0.57706 0.57535 0.5728 0.56966 0.56597 0.56197 0.55773 0.55328 0.54879 0.54421 0.53967 0.53512 0.53064 0.52625 0.52185 0.51754 0.51324 0.50902 0.50477 0.5006 0.49643 0.49228 0.48818 0.48405 0.48009 0.47615 0.47235 0.46872 0.46529 0.46208 0.45908 0.45645 0.45409 0.45211 0.45048 0.44928 0.44849 0.44809 0.4481 0.44856 0.44943 0.45076 0.45248 0.45466 0.45726 0.46018 0.4635 0.46706 0.47097 0.47503 0.4793 0.4837 0.48814 0.49273 0.49729 0.50187 0.50633 0.51079 0.51501 0.51913 0.52302 0.52672 0.5302 0.53345 0.53653 0.53942 0.54223 0.54484 0.54733 0.54964 0.55182 0.55386 0.55576 0.55753 0.55917 0.56066 0.56201 0.56326 0.56436 0.56537 0.56619 0.5669 0.56747 0.56789 0.56814 0.5682 0.56813 0.56791 0.56754 0.56695 0.56629 0.56542 0.56438 0.56316 0.56176 0.56017 0.55843 0.55652 0.55458 0.55257 0.55061 0.54867 0.54672 0.54475 0.54272 0.54066 0.53841 0.53618 0.53381 0.53147 0.5291 0.52673 0.52436 0.522 0.51958 0.51721 0.51482 0.51236 0.50989 0.50733 0.50481 0.50222 0.49969 0.49711 0.49466 0.49218 0.48974 0.48736 0.48504 0.48276 0.48053 0.47835 0.47615 0.47404 0.47192 0.46988 0.46786 0.46596 0.46416 0.46245 0.46086 0.45945 0.45821 0.45727 0.45663 0.45628 0.45635 0.45686 0.45782 0.45932 0.4613 0.46389 0.467 0.47073 0.47499 0.47983 0.48512 0.49092 0.49699 0.50341 0.50994 0.51658 0.52319 0.52977 0.53624 0.54268 0.54905 0.55548 0.56197 0.56842 0.57479 0.58064 0.58585 0.58998 0.59282 0.59436 0.59494 0.59498 0.59486 0.59503 0.59571 0.5971 0.59909 0.60154 0.60423 0.60672 0.60882 0.61016 0.61085 0.61096 0.61076 0.61034 0.60984 0.60931 0.60863 0.60785 0.607 0.60611 0.60521 0.60443 0.60388 0.60345 0.60318 0.60294 0.60251 0.60176 0.60058 0.59905 0.59737 0.59571 0.59437 0.59346 0.59285 0.59261 0.59254 0.59252 0.59252 0.59254 0.59243 0.5923 0.59208 0.59183 0.59159 0.59142 0.59142 0.59151 0.59188 0.59249 0.59336 0.5946 0.59616 0.59815 0.60043 0.60309 0.6061 0.60926 0.61265 0.61616 0.61975 0.62338 0.62707 0.63069 0.63445 0.638 0.64164 0.64536 0.64915 0.6529 0.65681 0.66096 0.66521 0.66948 0.67391 0.67818 0.68254 0.68678 0.69094 0.69493 0.69886 0.70266 0.70647 0.71012 0.71362 0.71705 0.7204 0.72366 0.7267 0.72968 0.73246 0.73513 0.73745 0.73957 0.74135 0.74293 0.74417 0.74503 0.74572 0.74612 0.74625 0.74614 0.74572 0.7451
-0.015345 -0.015407 -0.015475 -0.015502 -0.015478 -0.015411 -0.01529 -0.015089 -0.014757 -0.014309 -0.01367 -0.012886 -0.011858 -0.010555 -0.0089591 -0.0070583 -0.0048537 -0.002344 0.0005226 0.0035896 0.0068957 0.010443 0.014133 0.017985 0.021873 0.025815 0.029832 0.033732 0.037564 0.041348 0.04499 0.048472 0.051769 0.054898 0.057936 0.060795 0.063538 0.066264 0.06893 0.07158 0.074199 0.076744 0.079269 0.081624 0.083839 0.085858 0.08761 0.089085 0.090321 0.091222 0.091865 0.09218 0.092234 0.091956 0.09138 0.090477 0.089287 0.087795 0.086035 0.084104 0.082058 0.079877 0.077708 0.075559 0.073461 0.071486 0.069587 0.067863 0.066273 0.064809 0.063515 0.062345 0.061304 0.060406 0.059594 0.058907 0.058297 0.057747 0.057274 0.056848 0.056448 0.056087 0.055742 0.055397 0.055052 0.054691 0.054317 0.0539 0.053453 0.052977 0.05247 0.051947 0.051418 0.050892 0.050399 0.049948 0.049541 0.049214 0.048954 0.048799 0.048725 0.04876 0.0489 0.049175 0.049571 0.0501 0.050789 0.051616 0.052601 0.053762 0.055095 0.056622 0.058321 0.060193 0.062312 0.064574 0.067037 0.069668 0.072449 0.075414 0.078466 0.081598 0.084895 0.08819 0.091552 0.094917 0.098232 0.10158 0.1048 0.10792 0.11097 0.11388 0.11671 0.11941 0.12203 0.12463 0.12714 0.12964 0.13218 0.13484 0.13774 0.1409 0.1444 0.14837 0.15272 0.1576 0.1629 0.16867 0.17507 0.18188 0.18923 0.19716 0.20555 0.21451 0.22371 0.23313 0.24293 0.25262 0.26238 0.27194 0.2812 0.29034 0.29891 0.30701 0.31464 0.32156 0.328 0.3336 0.33859 0.34297 0.34669 0.34989 0.35257 0.35483 0.35678 0.3584 0.35976 0.3609 0.36184 0.36264 0.36325 0.36372 0.36404 0.3642 0.3642 0.36402 0.36371 0.36323 0.36265 0.36195 0.36117 0.36033 0.3594 0.35841 0.35736 0.35626 0.35508 0.35379 0.35248 0.35113 0.34972 0.34837 0.34688 0.34542 0.34396 0.34246 0.341 0.33954 0.33812 0.33673 0.33536 0.33406 0.33285 0.33167 0.33054 0.32953 0.32863 0.32783 0.32707 0.32638 0.32574 0.32516 0.32461 0.32412 0.32364 0.32319 0.32279 0.3224 0.32203 0.32167 0.32131 0.32095 0.32057 0.32014 0.31968 0.31914 0.31852 0.31783 0.31702 0.31611 0.31509 0.31397 0.31275 0.31137 0.3099 0.30829 0.30656 0.30475 0.30279 0.30078 0.29867 0.29653 0.29436 0.29211 0.28989 0.28765 0.28542 0.28323 0.28101 0.27886 0.27672 0.27462 0.27256 0.27051 0.26852 0.26655 0.26463 0.26278 0.26093 0.25918 0.25748 0.25583 0.25426 0.25277 0.25138 0.25009 0.24892 0.2479 0.24701 0.24627 0.24568 0.24524 0.24492 0.24476 0.24478 0.24506 0.2456 0.24647 0.24775 0.24937 0.25144 0.25391 0.25673 0.25998 0.26338 0.26695 0.27041 0.27374 0.27687 0.27963 0.2821 0.28411 0.28575 0.28704 0.28798 0.28875 0.28937 0.28994 0.2905 0.29106 0.29163 0.29216 0.29263 0.29298 0.2932 0.2933 0.2933 0.29327 0.29333 0.29351 0.2939 0.29446 0.29518 0.29596 0.29675 0.29752 0.29817 0.29872 0.29918 0.29953 0.29981 0.29996 0.30005 0.30006 0.30001 0.29993 0.29982 0.29962 0.29932 0.29885 0.29819 0.29736 0.29634 0.29517 0.29383 0.2924 0.29085 0.28924 0.28761 0.28594 0.2843 0.28269 0.28114 0.27968 0.27831 0.27702 0.27581 0.27468 0.27359 0.27249 0.27136 0.27019 0.26894 0.26761 0.26622 0.26476 0.26323 0.26177 0.26013 0.25851 0.25693 0.25539 0.25401 0.2528 0.25182 0.2511 0.25069 0.25057 0.25076 0.2513 0.25218 0.2534 0.25499 0.25697 0.25936 0.26235 0.26591 0.27012 0.27503 0.28071 0.28725 0.29466 0.30328 0.3129 0.3237 0.33559 0.34845 0.36229 0.37672 0.39193 0.40728 0.42276 0.43793 0.45256 0.46663 0.47959 0.49187 0.50305 0.51325 0.52242 0.5306 0.53782 0.54383 0.54882 0.55262 0.55521 0.55662 0.55694 0.5562 0.55448 0.55194 0.54883 0.5452 0.54121 0.53701 0.53262 0.52819 0.52368 0.51924 0.5148 0.51041 0.50611 0.50185 0.49768 0.4935 0.48941 0.48531 0.48123 0.47717 0.47311 0.46913 0.4651 0.4612 0.45735 0.45365 0.45009 0.44671 0.44354 0.44061 0.43804 0.43573 0.43377 0.43219 0.43101 0.43022 0.42985 0.42985 0.4303 0.43114 0.43242 0.4341 0.43622 0.43875 0.44163 0.4449 0.44839 0.45225 0.45625 0.46044 0.46477 0.46917 0.47368 0.47817 0.48272 0.48711 0.49149 0.49564 0.49967 0.50348 0.50706 0.5104 0.51349 0.51648 0.51923 0.52189 0.52437 0.52672 0.5289 0.53098 0.53294 0.53476 0.53643 0.53798 0.53942 0.54071 0.54188 0.54295 0.5439 0.54476 0.54545 0.54599 0.54637 0.54662 0.54671 0.54666 0.54645 0.54609 0.54561 0.54494 0.54413 0.54316 0.54202 0.5407 0.53915 0.53749 0.53567 0.53382 0.53192 0.53007 0.52819 0.52635 0.5245 0.52256 0.52057 0.51845 0.51629 0.51405 0.51183 0.50956 0.50733 0.50506 0.50283 0.50059 0.49829 0.496 0.49367 0.49131 0.48884 0.48637 0.48386 0.4814 0.47894 0.47648 0.47407 0.47168 0.46937 0.46706 0.46485 0.46262 0.46045 0.45829 0.45618 0.4541 0.45205 0.45011 0.44827 0.44648 0.44483 0.44329 0.44193 0.44077 0.43984 0.43924 0.43895 0.43905 0.43958 0.44055 0.44207 0.44406 0.44666 0.44978 0.45351 0.45775 0.46257 0.46784 0.47357 0.47957 0.48593 0.49236 0.49893 0.50543 0.5119 0.51826 0.52458 0.53086 0.53716 0.54352 0.54984 0.55607 0.56184 0.56697 0.57095 0.57375 0.57534 0.57596 0.57603 0.57603 0.57632 0.57718 0.57864 0.58076 0.5833 0.58603 0.58853 0.59053 0.59185 0.59242 0.59235 0.59205 0.5915 0.59095 0.59034 0.58964 0.58887 0.588 0.58711 0.58624 0.58555 0.58507 0.58479 0.58461 0.58449 0.58416 0.58348 0.5823 0.58079 0.57905 0.57737 0.57593 0.57488 0.57429 0.57398 0.57389 0.57381 0.57377 0.57371 0.57364 0.57346 0.57323 0.57295 0.57267 0.57249 0.57246 0.57254 0.57287 0.57345 0.57434 0.57549 0.577 0.57891 0.58112 0.58368 0.58659 0.58966 0.59296 0.5964 0.59992 0.60338 0.607 0.61055 0.61422 0.61778 0.62142 0.62491 0.62855 0.63223 0.6361 0.64008 0.64431 0.64855 0.65286 0.65715 0.66141 0.66556 0.66969 0.67362 0.67758 0.6814 0.68507 0.6887 0.69217 0.69558 0.69887 0.70207 0.70518 0.70807 0.71074 0.71328 0.71561 0.71757 0.71932 0.72079 0.72191 0.72276 0.72348 0.7238 0.72386 0.72367 0.72329 0.72266
-0.01432 -0.014379 -0.014439 -0.014475 -0.014441 -0.014387 -0.014273 -0.014055 -0.01373 -0.013272 -0.012626 -0.011836 -0.010781 -0.0094643 -0.0078375 -0.0058941 -0.0036472 -0.0010878 0.0018363 0.0049667 0.0083478 0.011973 0.015751 0.019695 0.023671 0.027712 0.031836 0.035834 0.039763 0.043651 0.047392 0.050974 0.054366 0.057584 0.060722 0.063674 0.066519 0.069332 0.072088 0.074824 0.077532 0.080167 0.082774 0.085216 0.087502 0.089588 0.091409 0.092933 0.094213 0.095149 0.09582 0.096145 0.096191 0.095896 0.095295 0.094354 0.093115 0.091575 0.08976 0.087767 0.085645 0.0834 0.081172 0.078959 0.076803 0.074769 0.072818 0.071041 0.069401 0.067887 0.066552 0.065347 0.064275 0.063354 0.06252 0.061808 0.061176 0.060613 0.060121 0.059681 0.059269 0.058891 0.058529 0.058173 0.057813 0.057431 0.057037 0.056609 0.056144 0.055652 0.05512 0.054576 0.054029 0.053482 0.05297 0.05251 0.052093 0.051748 0.051477 0.05131 0.051236 0.051275 0.051423 0.051706 0.052117 0.05266 0.05337 0.054231 0.055254 0.056457 0.057836 0.05942 0.06118 0.063124 0.065322 0.067674 0.070236 0.072967 0.075861 0.078947 0.082123 0.085389 0.088819 0.092254 0.095758 0.099263 0.10272 0.10622 0.10958 0.11285 0.11605 0.1191 0.12207 0.1249 0.12764 0.13038 0.13302 0.13566 0.13834 0.14114 0.14418 0.14748 0.15113 0.15533 0.15991 0.16506 0.17064 0.17671 0.18345 0.19062 0.19839 0.20676 0.2156 0.22504 0.23474 0.24466 0.25499 0.26519 0.27544 0.2855 0.29523 0.3048 0.31379 0.32227 0.33025 0.33745 0.34417 0.34998 0.35518 0.35973 0.36359 0.36691 0.36969 0.37204 0.37404 0.3757 0.37709 0.37827 0.37922 0.38004 0.38066 0.38114 0.38144 0.3816 0.38159 0.3814 0.38106 0.38055 0.37992 0.37918 0.37836 0.37746 0.37647 0.37543 0.3743 0.37309 0.37186 0.37051 0.36915 0.36772 0.36623 0.36481 0.36325 0.36172 0.36021 0.35866 0.35715 0.35564 0.35417 0.35275 0.35135 0.35002 0.34878 0.34757 0.34642 0.34539 0.34445 0.34362 0.34285 0.34214 0.34149 0.34091 0.34036 0.33985 0.33937 0.33892 0.3385 0.33809 0.33771 0.33735 0.33698 0.33662 0.33622 0.33578 0.33529 0.33473 0.33409 0.33336 0.33253 0.3316 0.33054 0.32936 0.32809 0.32665 0.32512 0.32344 0.32164 0.31976 0.31771 0.3156 0.31342 0.31117 0.3089 0.30657 0.30425 0.30191 0.29958 0.29728 0.29496 0.2927 0.29047 0.28826 0.28612 0.28397 0.28188 0.27983 0.27783 0.27589 0.27397 0.27213 0.27036 0.26864 0.26701 0.26544 0.26398 0.26264 0.26143 0.26035 0.25943 0.25867 0.25806 0.25759 0.25728 0.25713 0.25715 0.25743 0.258 0.25891 0.26024 0.26194 0.26409 0.26666 0.26959 0.27296 0.27651 0.28022 0.28383 0.28729 0.29053 0.29338 0.29592 0.29797 0.29964 0.30094 0.30189 0.30266 0.30328 0.30384 0.30441 0.30499 0.30558 0.30613 0.3066 0.30699 0.30723 0.30735 0.30739 0.30741 0.30752 0.30776 0.30821 0.30883 0.3096 0.31043 0.31126 0.31204 0.31272 0.3133 0.31377 0.31413 0.31442 0.31459 0.31471 0.31473 0.31471 0.31466 0.31458 0.31442 0.31413 0.31368 0.313 0.31215 0.31111 0.3099 0.30849 0.30698 0.30537 0.3037 0.30199 0.30023 0.29852 0.29683 0.29522 0.29369 0.29225 0.29091 0.28964 0.28846 0.28732 0.28617 0.285 0.28376 0.28247 0.28108 0.27963 0.27812 0.27651 0.27497 0.27326 0.27156 0.26989 0.26828 0.26683 0.26557 0.26455 0.26378 0.26336 0.26324 0.26343 0.264 0.26492 0.26621 0.26789 0.26998 0.27247 0.27562 0.27936 0.28381 0.28901 0.29498 0.30186 0.30964 0.31868 0.32872 0.34002 0.35242 0.36582 0.38019 0.39515 0.41088 0.42673 0.44268 0.45825 0.47322 0.48761 0.50088 0.51337 0.52472 0.53507 0.54437 0.55261 0.5599 0.56595 0.57097 0.5748 0.5774 0.57881 0.57908 0.57833 0.57656 0.574 0.57083 0.56715 0.5631 0.55885 0.55444 0.54996 0.54539 0.54088 0.53635 0.53194 0.5276 0.52327 0.51903 0.51477 0.5106 0.5064 0.50228 0.49813 0.49398 0.48991 0.4858 0.48184 0.47791 0.47411 0.47048 0.46702 0.46381 0.46079 0.45815 0.45577 0.45377 0.45215 0.45096 0.45016 0.44977 0.44976 0.45024 0.45111 0.45247 0.45422 0.45641 0.45901 0.46196 0.46527 0.4689 0.47284 0.47691 0.48121 0.48563 0.49014 0.49471 0.49926 0.50385 0.50835 0.51279 0.51702 0.5211 0.52499 0.52863 0.53205 0.53524 0.5383 0.54111 0.54384 0.54638 0.54878 0.55103 0.55312 0.55513 0.55698 0.55871 0.56029 0.56175 0.56307 0.5643 0.56539 0.56635 0.5672 0.5679 0.56849 0.56892 0.56922 0.56929 0.56928 0.56909 0.56874 0.56828 0.56763 0.56679 0.56584 0.56467 0.56332 0.56178 0.5601 0.55829 0.55638 0.55446 0.55255 0.5507 0.54882 0.54693 0.54497 0.54294 0.5408 0.53861 0.53638 0.5341 0.5318 0.5295 0.52721 0.52492 0.52263 0.52031 0.51797 0.51555 0.51313 0.51063 0.50814 0.5056 0.5031 0.50062 0.49816 0.49573 0.49333 0.49098 0.48869 0.48646 0.48424 0.48211 0.47996 0.47786 0.47573 0.47372 0.47175 0.46984 0.468 0.46633 0.46476 0.46337 0.46216 0.46122 0.46057 0.46027 0.46039 0.46095 0.46197 0.46353 0.46559 0.46826 0.47148 0.47532 0.47965 0.48463 0.48998 0.49582 0.50196 0.50839 0.51495 0.52157 0.52811 0.53466 0.5411 0.54746 0.55377 0.56013 0.56653 0.57295 0.5792 0.58499 0.59013 0.59412 0.59695 0.59852 0.59911 0.59916 0.59913 0.59937 0.60017 0.60164 0.60371 0.60624 0.60891 0.61144 0.6135 0.61484 0.61549 0.61556 0.61526 0.61481 0.6143 0.61373 0.61307 0.6123 0.61144 0.61054 0.60977 0.60907 0.60856 0.60823 0.60803 0.60786 0.60748 0.60678 0.60565 0.6041 0.60237 0.60069 0.59928 0.59832 0.5977 0.59744 0.59736 0.59737 0.59732 0.5973 0.59719 0.59702 0.59683 0.59653 0.59628 0.59607 0.59601 0.59611 0.59645 0.59706 0.59791 0.59914 0.60067 0.60253 0.60479 0.60737 0.61032 0.61348 0.61681 0.62026 0.62379 0.62729 0.63096 0.63447 0.63807 0.64168 0.64527 0.6489 0.65261 0.65639 0.66032 0.66431 0.66851 0.6727 0.67702 0.68134 0.68562 0.68985 0.69404 0.69802 0.70191 0.70566 0.70937 0.71303 0.71649 0.71984 0.72317 0.7263 0.72935 0.73228 0.73499 0.7375 0.73974 0.7418 0.74362 0.74517 0.74631 0.74728 0.748 0.74835 0.74834 0.74825 0.7478 0.7472
-0.013409 -0.01348 -0.013558 -0.013608 -0.013583 -0.013535 -0.013445 -0.013245 -0.01294 -0.012498 -0.011876 -0.011117 -0.010097 -0.0088145 -0.00722 -0.0053154 -0.0030999 -0.0005722 0.0023228 0.0054418 0.0088199 0.012458 0.016266 0.020238 0.024253 0.028333 0.032501 0.036544 0.040511 0.044425 0.04819 0.051788 0.05519 0.058415 0.061553 0.064513 0.067358 0.070188 0.072967 0.075733 0.078479 0.081162 0.083829 0.086331 0.088696 0.090866 0.092772 0.094384 0.095749 0.096768 0.097514 0.097904 0.098008 0.097751 0.097178 0.096242 0.095008 0.093456 0.091617 0.089594 0.087442 0.085163 0.082892 0.08064 0.078447 0.076379 0.074391 0.072586 0.070925 0.069396 0.068045 0.066837 0.065762 0.06484 0.064012 0.063306 0.062683 0.062128 0.061639 0.061194 0.060784 0.060396 0.060023 0.059653 0.059274 0.058874 0.058465 0.058018 0.057534 0.05703 0.056491 0.055939 0.055392 0.054844 0.054325 0.053865 0.053445 0.053102 0.052828 0.052656 0.052578 0.052611 0.052755 0.053028 0.053429 0.053967 0.054669 0.055521 0.056537 0.057739 0.059114 0.060701 0.062461 0.064404 0.066606 0.068958 0.071519 0.074255 0.077152 0.080227 0.0834 0.086652 0.090071 0.093495 0.096985 0.10048 0.10392 0.1074 0.11074 0.11401 0.1172 0.12023 0.12319 0.12603 0.12876 0.13151 0.13416 0.1368 0.13947 0.14226 0.14528 0.14857 0.15214 0.15632 0.16088 0.16599 0.17153 0.17758 0.18429 0.19145 0.19922 0.2076 0.21648 0.22598 0.23572 0.24575 0.25619 0.26653 0.27695 0.28717 0.29708 0.30684 0.31602 0.32467 0.33283 0.3402 0.34706 0.35302 0.35833 0.36299 0.36696 0.37037 0.37322 0.37563 0.37768 0.37937 0.38078 0.38197 0.38294 0.38375 0.38438 0.38485 0.38516 0.3853 0.38528 0.38507 0.38474 0.38421 0.38355 0.38278 0.38191 0.38096 0.37991 0.37881 0.37764 0.37635 0.37503 0.37364 0.37224 0.37077 0.36926 0.36779 0.36621 0.36469 0.36316 0.36163 0.36013 0.35865 0.35721 0.35582 0.35447 0.3532 0.35199 0.35083 0.34972 0.34875 0.34786 0.34706 0.34633 0.34568 0.34512 0.34459 0.34409 0.34364 0.3432 0.34281 0.34244 0.34208 0.34174 0.34142 0.34107 0.34074 0.34039 0.33996 0.33949 0.33894 0.33831 0.3376 0.33677 0.33584 0.33479 0.33363 0.33236 0.33091 0.32937 0.3277 0.32589 0.324 0.32194 0.31984 0.31763 0.31537 0.31308 0.31073 0.30839 0.30601 0.30365 0.30133 0.29898 0.29667 0.29439 0.29216 0.28998 0.28779 0.28567 0.28359 0.28155 0.27958 0.27764 0.27576 0.27395 0.2722 0.27053 0.26893 0.26742 0.26603 0.26475 0.26362 0.26261 0.26176 0.26105 0.26047 0.26002 0.25974 0.25963 0.25977 0.26022 0.26099 0.26222 0.26382 0.26591 0.26843 0.27136 0.27475 0.27832 0.2821 0.2858 0.28937 0.29272 0.29568 0.29832 0.30046 0.30218 0.30351 0.30445 0.30519 0.30576 0.30626 0.30673 0.30721 0.3077 0.3082 0.30864 0.309 0.30926 0.30939 0.30945 0.30952 0.30968 0.31 0.31054 0.31126 0.31214 0.31309 0.31403 0.31493 0.3157 0.31635 0.31689 0.31732 0.31766 0.31789 0.31805 0.31812 0.31814 0.31813 0.3181 0.31795 0.31769 0.31724 0.31657 0.31569 0.31462 0.31338 0.31192 0.31035 0.30867 0.30692 0.30515 0.30333 0.30155 0.29982 0.29815 0.29656 0.29508 0.29371 0.29241 0.2912 0.29002 0.28885 0.28767 0.28642 0.28509 0.28369 0.28223 0.28069 0.27906 0.27748 0.27575 0.27402 0.27231 0.27068 0.2692 0.26789 0.26685 0.26606 0.2656 0.26545 0.26564 0.26619 0.2671 0.26835 0.27 0.27204 0.27449 0.27755 0.28124 0.28566 0.29079 0.29671 0.3035 0.31118 0.32013 0.33006 0.34124 0.35358 0.36691 0.38125 0.39617 0.41191 0.42776 0.44377 0.45943 0.47448 0.48897 0.50233 0.51491 0.52637 0.53685 0.54622 0.55455 0.56194 0.56805 0.57314 0.57706 0.57972 0.58117 0.58148 0.58075 0.579 0.57646 0.57328 0.56958 0.56551 0.56124 0.55675 0.55226 0.54764 0.54309 0.5385 0.534 0.52955 0.52515 0.52082 0.51647 0.5122 0.50794 0.50369 0.49948 0.49527 0.49117 0.48703 0.48304 0.47908 0.47529 0.47164 0.46819 0.465 0.46203 0.45942 0.45707 0.45512 0.4535 0.45238 0.45165 0.45133 0.45144 0.45197 0.45294 0.45437 0.45622 0.45852 0.46122 0.46426 0.46769 0.47138 0.47541 0.47957 0.48394 0.48844 0.493 0.49763 0.50226 0.50693 0.51146 0.516 0.52031 0.52452 0.52853 0.53231 0.53594 0.53932 0.54258 0.5456 0.5485 0.55123 0.55386 0.55632 0.55861 0.56076 0.56275 0.56464 0.56637 0.56795 0.56938 0.5707 0.57187 0.57291 0.5738 0.57456 0.57515 0.57559 0.57585 0.57597 0.5759 0.5757 0.57534 0.57476 0.57408 0.57322 0.57216 0.57092 0.56948 0.56784 0.56604 0.5641 0.56209 0.56005 0.55802 0.55599 0.55399 0.55198 0.54986 0.54769 0.54539 0.54307 0.54061 0.53818 0.53571 0.53323 0.53075 0.5283 0.5258 0.52334 0.52085 0.51833 0.51579 0.51323 0.51065 0.50801 0.50544 0.50284 0.5003 0.49779 0.49534 0.49296 0.4906 0.48833 0.48609 0.48389 0.48168 0.47954 0.47742 0.47533 0.47332 0.4714 0.46954 0.46783 0.46623 0.46479 0.46355 0.46257 0.46192 0.46155 0.46161 0.4621 0.46303 0.46451 0.4665 0.46907 0.47218 0.47595 0.48024 0.48518 0.49051 0.49638 0.50254 0.50911 0.51576 0.52261 0.52934 0.53608 0.54272 0.54933 0.55594 0.56251 0.56914 0.57579 0.58235 0.58841 0.59375 0.59799 0.60091 0.60251 0.60305 0.60303 0.60287 0.60302 0.60368 0.60511 0.60721 0.60972 0.61244 0.61499 0.61709 0.61845 0.61914 0.61927 0.61904 0.61858 0.6181 0.61751 0.6168 0.61599 0.61507 0.61411 0.61316 0.61232 0.6117 0.61124 0.61095 0.61069 0.61023 0.6095 0.60825 0.60669 0.60495 0.60331 0.60198 0.60105 0.60051 0.60032 0.60029 0.60033 0.60037 0.60041 0.60036 0.60021 0.60003 0.59979 0.59955 0.59934 0.59936 0.5994 0.59977 0.60038 0.60131 0.60255 0.60419 0.60622 0.60859 0.61129 0.61435 0.61756 0.62103 0.62453 0.62818 0.63187 0.63551 0.63923 0.64285 0.64655 0.6502 0.65395 0.6577 0.66154 0.6655 0.66959 0.67385 0.67807 0.68243 0.68684 0.69123 0.69537 0.69947 0.70349 0.70735 0.71115 0.71485 0.7184 0.7219 0.72525 0.72857 0.7318 0.7347 0.73781 0.74057 0.74307 0.74543 0.74752 0.74928 0.75077 0.75198 0.75297 0.7536 0.7539 0.75406 0.75376 0.7534 0.75277
-0.01423 -0.014298 -0.014365 -0.0144 -0.01439 -0.014339 -0.014235 -0.014046 -0.013746 -0.013321 -0.01272 -0.011968 -0.010969 -0.0097229 -0.008174 -0.006322 -0.0041645 -0.0017101 0.0011016 0.0041201 0.0073938 0.010914 0.014594 0.018441 0.022328 0.026276 0.030304 0.034211 0.038038 0.041823 0.045455 0.048923 0.052198 0.055297 0.058305 0.061137 0.063867 0.066569 0.069222 0.071872 0.074509 0.077079 0.079633 0.082034 0.084306 0.086391 0.088222 0.089775 0.091092 0.092073 0.092795 0.093171 0.09328 0.093046 0.092507 0.091623 0.090439 0.088949 0.087187 0.085233 0.083158 0.080953 0.078759 0.076586 0.074463 0.072466 0.070546 0.068804 0.067197 0.065716 0.064416 0.063244 0.062198 0.061312 0.060507 0.05982 0.059214 0.058674 0.058196 0.057767 0.057362 0.056985 0.056623 0.056262 0.055895 0.055509 0.055108 0.054674 0.054204 0.053713 0.05319 0.052661 0.052127 0.051596 0.051098 0.050652 0.050246 0.049914 0.049642 0.049484 0.049404 0.049431 0.049563 0.049826 0.050205 0.05072 0.05139 0.052207 0.053178 0.054323 0.055644 0.057163 0.058842 0.060711 0.062818 0.065071 0.06752 0.070136 0.072904 0.07585 0.078888 0.082 0.085268 0.088532 0.091862 0.09519 0.09847 0.10179 0.10498 0.10807 0.11112 0.11403 0.11686 0.11957 0.1222 0.12481 0.12733 0.12983 0.13238 0.13502 0.13789 0.14103 0.14451 0.14846 0.15279 0.15768 0.16298 0.16876 0.17517 0.18201 0.18943 0.19743 0.20593 0.21501 0.22436 0.23394 0.24395 0.25386 0.26383 0.27364 0.28315 0.29251 0.30133 0.30963 0.31747 0.32456 0.33118 0.33691 0.34201 0.3465 0.35031 0.35358 0.35632 0.35863 0.36059 0.36222 0.36358 0.36473 0.36566 0.36644 0.36704 0.3675 0.36779 0.36792 0.3679 0.36768 0.36734 0.36681 0.36618 0.36545 0.3646 0.3637 0.36271 0.36166 0.36056 0.3594 0.35815 0.35682 0.35548 0.35409 0.35263 0.35124 0.34969 0.34818 0.34667 0.34511 0.3436 0.34209 0.34064 0.33922 0.33785 0.33654 0.33532 0.33415 0.33303 0.33204 0.33115 0.33037 0.32965 0.32898 0.32838 0.32784 0.32735 0.32689 0.32645 0.32605 0.32567 0.32534 0.32502 0.32468 0.32435 0.32401 0.32365 0.32324 0.32279 0.32226 0.32165 0.32096 0.32016 0.31926 0.31823 0.31711 0.31588 0.3145 0.31302 0.3114 0.30968 0.30786 0.30588 0.30385 0.30173 0.29956 0.29736 0.29509 0.29285 0.29057 0.28831 0.28608 0.28382 0.28162 0.27945 0.27731 0.27522 0.27313 0.27111 0.26912 0.26716 0.26529 0.26342 0.26163 0.2599 0.25823 0.25664 0.25511 0.2537 0.25237 0.25118 0.25011 0.24916 0.24837 0.24772 0.24719 0.2468 0.24655 0.24647 0.24663 0.24707 0.24783 0.24902 0.25058 0.25259 0.25502 0.25783 0.26107 0.26452 0.26816 0.27173 0.27517 0.27843 0.28134 0.28394 0.28605 0.28778 0.28913 0.29012 0.29088 0.29148 0.29202 0.29251 0.293 0.2935 0.29398 0.29439 0.29471 0.2949 0.29495 0.29491 0.29488 0.29494 0.29515 0.29559 0.29621 0.29701 0.2979 0.29881 0.29965 0.30041 0.30107 0.3016 0.30203 0.30235 0.30255 0.30268 0.30271 0.30269 0.30263 0.30254 0.30237 0.30209 0.30162 0.30095 0.30009 0.29904 0.29783 0.29644 0.29494 0.29333 0.29167 0.28997 0.28822 0.28653 0.28485 0.28326 0.28174 0.28031 0.27898 0.27772 0.27654 0.2754 0.27426 0.2731 0.27187 0.27059 0.26924 0.26783 0.26634 0.26477 0.26326 0.26159 0.25994 0.25831 0.25676 0.25535 0.25412 0.25312 0.25238 0.25194 0.25179 0.25194 0.25245 0.2533 0.25448 0.256 0.25793 0.26023 0.26317 0.26669 0.27089 0.27577 0.28145 0.28796 0.29531 0.30387 0.31341 0.32413 0.33598 0.3488 0.36258 0.377 0.39219 0.40751 0.42303 0.43823 0.4529 0.46703 0.48006 0.49236 0.50357 0.5138 0.52299 0.53116 0.53841 0.54443 0.54944 0.55325 0.55584 0.55726 0.55752 0.55677 0.55504 0.55251 0.54938 0.5457 0.5417 0.53747 0.53303 0.52858 0.52404 0.51952 0.51501 0.51058 0.50622 0.50186 0.49761 0.49335 0.48919 0.48499 0.48083 0.47672 0.47259 0.46856 0.46452 0.46061 0.45676 0.45307 0.4495 0.44615 0.44304 0.44014 0.43759 0.43531 0.43342 0.43189 0.43078 0.43007 0.42974 0.42983 0.43037 0.43131 0.43269 0.43447 0.43672 0.43935 0.44233 0.44567 0.44928 0.45321 0.45727 0.46153 0.46588 0.47035 0.47487 0.47939 0.48399 0.48844 0.49286 0.49708 0.5012 0.50512 0.50882 0.51232 0.51563 0.51881 0.52175 0.52461 0.5273 0.52983 0.53224 0.53445 0.53657 0.53853 0.54037 0.54203 0.54356 0.54495 0.54618 0.54732 0.54833 0.5492 0.54991 0.55046 0.55085 0.55111 0.55118 0.55111 0.55085 0.55045 0.54988 0.54917 0.54828 0.54722 0.546 0.54455 0.5429 0.54114 0.53921 0.53725 0.53525 0.53321 0.53121 0.52926 0.52724 0.52516 0.52302 0.52072 0.51839 0.51595 0.51354 0.51104 0.50862 0.50616 0.50376 0.50129 0.49887 0.49645 0.49398 0.49151 0.48897 0.48643 0.48384 0.48133 0.47878 0.47628 0.47381 0.47135 0.46897 0.46662 0.46436 0.4621 0.4599 0.45773 0.45564 0.45348 0.45146 0.44948 0.4476 0.44581 0.44414 0.44262 0.44129 0.44011 0.43922 0.43858 0.43828 0.43835 0.43888 0.43983 0.44128 0.44327 0.44583 0.44893 0.45262 0.45682 0.46164 0.46688 0.47261 0.47865 0.48506 0.49157 0.49824 0.50486 0.51151 0.51803 0.52452 0.531 0.53747 0.54404 0.55056 0.55699 0.56293 0.56825 0.57239 0.57531 0.57694 0.5776 0.57766 0.57764 0.57791 0.57871 0.58021 0.58238 0.58497 0.58779 0.59031 0.59236 0.59366 0.59424 0.59426 0.59389 0.59339 0.59278 0.59216 0.59143 0.5906 0.58966 0.58868 0.58775 0.58696 0.58642 0.58605 0.58583 0.58563 0.58527 0.58457 0.58337 0.5818 0.58003 0.57832 0.57695 0.5759 0.57532 0.57505 0.57502 0.575 0.57501 0.575 0.57493 0.57482 0.57462 0.57433 0.57408 0.5739 0.57383 0.57391 0.57423 0.57483 0.57573 0.5769 0.57847 0.5804 0.58268 0.58533 0.5882 0.59137 0.59467 0.59812 0.6017 0.60531 0.60889 0.61254 0.61616 0.6198 0.6235 0.62705 0.63072 0.6345 0.63845 0.64249 0.6467 0.65087 0.65524 0.65951 0.66386 0.66797 0.67209 0.67609 0.67998 0.68377 0.68742 0.69106 0.69456 0.69797 0.70127 0.70447 0.70759 0.71057 0.71333 0.71584 0.71818 0.72025 0.72201 0.72342 0.72469 0.72551 0.72616 0.7265 0.72649 0.72637 0.72587 0.72524
-0.0090972 -0.0091656 -0.0092339 -0.0092752 -0.0092581 -0.0092101 -0.0091036 -0.0089048 -0.0086139 -0.0081686 -0.0075668 -0.0068063 -0.0058071 -0.0045299 -0.0029615 -0.001079 0.0011068 0.0035983 0.0064467 0.0095251 0.012848 0.016415 0.02015 0.02403 0.027959 0.031946 0.036003 0.03994 0.043808 0.047626 0.051292 0.054808 0.058127 0.061274 0.064341 0.067238 0.070026 0.072789 0.075494 0.078189 0.080861 0.083464 0.086046 0.088471 0.090751 0.092842 0.094667 0.096217 0.097517 0.098469 0.099163 0.099513 0.099586 0.099303 0.098723 0.097804 0.096588 0.095081 0.093307 0.091356 0.089278 0.087084 0.084897 0.082729 0.080617 0.07862 0.076702 0.074963 0.073364 0.071883 0.070584 0.069415 0.068378 0.067489 0.066685 0.066007 0.065407 0.064875 0.064407 0.063986 0.063586 0.063213 0.062855 0.062504 0.062147 0.061763 0.061368 0.060931 0.06047 0.05998 0.059457 0.058925 0.058387 0.057854 0.057347 0.056892 0.056482 0.056144 0.055875 0.05571 0.055631 0.055659 0.055795 0.056064 0.056453 0.056977 0.057665 0.058499 0.059486 0.060658 0.061997 0.063539 0.065252 0.067145 0.069288 0.071579 0.074074 0.076737 0.079545 0.082545 0.085629 0.088787 0.092104 0.095426 0.098814 0.10218 0.10552 0.10889 0.11213 0.11529 0.11838 0.12132 0.1242 0.12694 0.12961 0.13227 0.13484 0.13739 0.13996 0.14264 0.14555 0.14871 0.15214 0.15618 0.16058 0.16551 0.17087 0.1767 0.18318 0.19007 0.19754 0.20559 0.2141 0.2232 0.23253 0.24211 0.25208 0.26195 0.27187 0.28162 0.29105 0.30034 0.30908 0.3173 0.32505 0.33207 0.33859 0.34424 0.34929 0.35372 0.3575 0.36074 0.36345 0.36574 0.3677 0.36932 0.37067 0.37181 0.37273 0.37352 0.37412 0.37457 0.37489 0.37502 0.37502 0.37483 0.37449 0.37399 0.3734 0.37267 0.37186 0.37098 0.37001 0.36897 0.36787 0.36671 0.36545 0.36414 0.36282 0.36144 0.36 0.35864 0.35713 0.35565 0.35418 0.35269 0.35123 0.34979 0.34837 0.34702 0.34568 0.34443 0.34324 0.34212 0.34102 0.34004 0.33918 0.3384 0.3377 0.33707 0.33648 0.33595 0.33546 0.33502 0.33458 0.33419 0.33383 0.33348 0.33315 0.33284 0.33251 0.33218 0.33183 0.33143 0.33099 0.33045 0.32986 0.32918 0.32838 0.32749 0.32648 0.32538 0.32416 0.32277 0.3213 0.31969 0.31797 0.31616 0.31419 0.31217 0.31005 0.30788 0.30569 0.30343 0.30118 0.29892 0.29666 0.29443 0.29218 0.28998 0.2878 0.28566 0.28358 0.28148 0.27945 0.27746 0.2755 0.27362 0.27175 0.26994 0.26821 0.26652 0.26492 0.26337 0.26192 0.26057 0.25934 0.25823 0.25725 0.2564 0.25571 0.25513 0.2547 0.25442 0.25431 0.25445 0.25488 0.25562 0.25679 0.25831 0.2603 0.26269 0.26547 0.26867 0.27207 0.27564 0.27912 0.28247 0.2856 0.28836 0.29081 0.29276 0.29432 0.29552 0.29635 0.29701 0.29751 0.29795 0.29838 0.29882 0.29928 0.29974 0.30015 0.3005 0.30076 0.30092 0.30102 0.30113 0.30133 0.30166 0.30221 0.30291 0.30375 0.30464 0.30553 0.30635 0.30705 0.30765 0.30813 0.3085 0.30878 0.30898 0.30912 0.3092 0.30922 0.30921 0.30918 0.30906 0.30882 0.30838 0.30773 0.30688 0.30583 0.30462 0.30322 0.3017 0.30008 0.29839 0.29668 0.29493 0.29323 0.29154 0.28994 0.28844 0.287 0.28569 0.28443 0.28326 0.28213 0.281 0.27986 0.27865 0.27739 0.27605 0.27465 0.27316 0.27159 0.27009 0.26843 0.26677 0.26515 0.26359 0.26219 0.26095 0.25994 0.25919 0.25876 0.2586 0.25876 0.25928 0.26013 0.26131 0.26288 0.26481 0.26712 0.27007 0.27357 0.27777 0.2827 0.28837 0.29488 0.3022 0.31072 0.3202 0.33085 0.34254 0.35521 0.36882 0.38297 0.39791 0.41291 0.42806 0.4429 0.45718 0.47092 0.48359 0.49556 0.50644 0.51638 0.52533 0.53326 0.54029 0.54615 0.55102 0.55473 0.55728 0.55864 0.55892 0.5582 0.55649 0.554 0.55096 0.54741 0.54349 0.53938 0.53507 0.53076 0.52636 0.52202 0.51762 0.51333 0.50911 0.50489 0.50077 0.49664 0.49256 0.4885 0.48446 0.48047 0.47646 0.47255 0.46862 0.4648 0.46103 0.4574 0.45394 0.45066 0.44761 0.44477 0.4423 0.44007 0.43823 0.43672 0.43563 0.43494 0.43462 0.43471 0.43525 0.43616 0.43753 0.43928 0.44147 0.44403 0.44694 0.45023 0.45373 0.45756 0.46152 0.46569 0.46993 0.47431 0.47872 0.48313 0.48761 0.49194 0.49625 0.50042 0.50443 0.50826 0.51189 0.51536 0.51858 0.5217 0.52461 0.52741 0.53004 0.53256 0.5349 0.53713 0.53919 0.54113 0.54293 0.54463 0.54616 0.54755 0.54882 0.54995 0.55098 0.55185 0.55259 0.55316 0.55358 0.55385 0.55396 0.55393 0.55371 0.55334 0.55284 0.55215 0.55131 0.55031 0.54912 0.54775 0.54617 0.54446 0.54256 0.54067 0.53866 0.53667 0.53468 0.53275 0.53078 0.52873 0.52664 0.52438 0.52214 0.51974 0.5174 0.51499 0.51258 0.5102 0.50781 0.50541 0.50305 0.50066 0.49824 0.49577 0.49329 0.49079 0.48827 0.48577 0.48328 0.48084 0.47843 0.47609 0.47374 0.47147 0.46927 0.4671 0.46495 0.46285 0.46078 0.45872 0.45674 0.4548 0.45294 0.45119 0.44954 0.44801 0.44667 0.44547 0.44453 0.44387 0.44353 0.44357 0.44401 0.4449 0.44628 0.44813 0.45057 0.45352 0.45708 0.46112 0.46578 0.47086 0.47641 0.48233 0.48857 0.49489 0.50141 0.50785 0.51431 0.52066 0.52697 0.53324 0.53954 0.54593 0.55231 0.55859 0.56442 0.56954 0.57352 0.57629 0.57779 0.57829 0.5782 0.57804 0.57809 0.57873 0.58003 0.58202 0.58446 0.58706 0.58948 0.59146 0.59285 0.59352 0.59363 0.59338 0.59298 0.59246 0.59189 0.59119 0.59037 0.58949 0.58855 0.58758 0.58678 0.58613 0.58566 0.58534 0.58507 0.58458 0.58381 0.58265 0.58115 0.57951 0.57791 0.57664 0.57576 0.57525 0.57502 0.57495 0.57498 0.57499 0.57503 0.57494 0.57477 0.57459 0.57432 0.57406 0.57387 0.5738 0.57391 0.57424 0.57483 0.57568 0.57689 0.57846 0.58035 0.58262 0.58523 0.58814 0.59123 0.59455 0.59794 0.60141 0.60494 0.60855 0.61204 0.61559 0.61921 0.62275 0.62627 0.62989 0.63347 0.6373 0.64121 0.64533 0.64945 0.65366 0.65783 0.66209 0.66611 0.67006 0.67386 0.67765 0.68131 0.68486 0.68832 0.69171 0.69498 0.69826 0.70134 0.70439 0.70719 0.7098 0.71227 0.71459 0.71653 0.7182 0.71967 0.72085 0.7217 0.72238 0.72265 0.72261 0.72248 0.72208 0.72148
-0.018479 -0.01853 -0.018586 -0.018617 -0.018589 -0.018526 -0.018423 -0.01822 -0.017911 -0.017475 -0.016865 -0.016105 -0.015097 -0.013839 -0.012289 -0.01043 -0.0082774 -0.0058233 -0.0030248 -1.62e-005 0.0032223 0.0067028 0.010326 0.014101 0.017912 0.021773 0.025711 0.029529 0.033272 0.036978 0.040546 0.043956 0.047191 0.050256 0.053245 0.056063 0.058778 0.061464 0.064095 0.06671 0.069299 0.071809 0.074297 0.076623 0.078806 0.080801 0.082539 0.083992 0.085212 0.086106 0.086744 0.08705 0.087095 0.086815 0.086242 0.085347 0.084179 0.082728 0.081015 0.079141 0.077145 0.075036 0.072934 0.07085 0.06882 0.066905 0.065065 0.063391 0.061851 0.060433 0.059174 0.058048 0.057044 0.056187 0.055416 0.054754 0.054168 0.053649 0.053194 0.052786 0.052401 0.052055 0.051721 0.051386 0.051048 0.050691 0.050319 0.049912 0.049469 0.048998 0.048495 0.047985 0.047464 0.046949 0.046469 0.046026 0.045631 0.045304 0.045048 0.044889 0.044819 0.044854 0.044993 0.045262 0.045649 0.046167 0.046842 0.047657 0.048637 0.049782 0.05109 0.052601 0.054266 0.056118 0.058206 0.06043 0.062856 0.065446 0.068181 0.071092 0.074089 0.077156 0.080379 0.083598 0.086882 0.090151 0.093381 0.096641 0.099772 0.10282 0.1058 0.10864 0.11142 0.11408 0.11666 0.11924 0.12172 0.12419 0.12669 0.12929 0.13212 0.13519 0.13861 0.14253 0.14677 0.15152 0.15672 0.16236 0.16864 0.17529 0.18251 0.19029 0.19849 0.20727 0.21626 0.22548 0.23508 0.24457 0.25411 0.26348 0.27255 0.2815 0.28989 0.29781 0.30527 0.31204 0.31834 0.32381 0.32869 0.33297 0.33661 0.33974 0.34237 0.3446 0.34651 0.34809 0.34943 0.35056 0.35147 0.35225 0.35285 0.35332 0.35363 0.35378 0.35378 0.35362 0.35331 0.35285 0.35228 0.3516 0.35084 0.35002 0.34912 0.34815 0.34712 0.34607 0.34491 0.34371 0.34242 0.34111 0.33974 0.33844 0.337 0.33557 0.33413 0.33267 0.33123 0.3298 0.3284 0.32705 0.32572 0.32447 0.32328 0.32214 0.32105 0.3201 0.31924 0.31844 0.3177 0.31703 0.3164 0.31586 0.31535 0.31486 0.31442 0.314 0.31362 0.31325 0.3129 0.31256 0.31221 0.31188 0.31151 0.3111 0.31066 0.31014 0.30954 0.30887 0.30808 0.30721 0.30621 0.30512 0.30391 0.30256 0.30111 0.29954 0.29784 0.29606 0.29413 0.29215 0.29008 0.28797 0.28582 0.28362 0.28143 0.27922 0.27702 0.27486 0.27268 0.27054 0.26843 0.26635 0.26432 0.26229 0.26033 0.25839 0.25649 0.25466 0.25284 0.25109 0.2494 0.24777 0.24622 0.24473 0.24332 0.24202 0.24084 0.23979 0.23886 0.23808 0.23745 0.23694 0.23656 0.23636 0.2363 0.2365 0.23697 0.23775 0.23895 0.24047 0.24245 0.2448 0.24753 0.25065 0.25395 0.2574 0.26076 0.26399 0.267 0.26964 0.27197 0.27384 0.27534 0.2765 0.27733 0.27798 0.2785 0.27898 0.27944 0.27992 0.28042 0.28091 0.28134 0.28171 0.28198 0.28213 0.28222 0.2823 0.28246 0.28273 0.28321 0.28382 0.28459 0.28539 0.28619 0.28694 0.28757 0.2881 0.28853 0.28887 0.28912 0.28929 0.2894 0.28944 0.28946 0.28943 0.28938 0.28924 0.28898 0.28855 0.28792 0.28708 0.28608 0.28493 0.28359 0.28214 0.28059 0.27899 0.27736 0.27569 0.27405 0.27245 0.27092 0.26948 0.26811 0.26683 0.26563 0.26451 0.26342 0.26233 0.26123 0.26007 0.25884 0.25754 0.25617 0.25473 0.25322 0.25175 0.25014 0.24854 0.24697 0.24547 0.24412 0.24293 0.24198 0.24126 0.24085 0.24073 0.24089 0.24141 0.24227 0.24343 0.24496 0.24685 0.24913 0.25203 0.2555 0.25967 0.26452 0.27008 0.27648 0.28368 0.29208 0.30143 0.31193 0.32349 0.33599 0.34941 0.36343 0.37817 0.393 0.40804 0.42275 0.43695 0.45064 0.46328 0.47521 0.48612 0.49608 0.50507 0.51303 0.52011 0.52604 0.53096 0.5347 0.53726 0.53864 0.53892 0.53819 0.53648 0.53396 0.53088 0.52728 0.52338 0.51925 0.51492 0.51057 0.50614 0.50178 0.49741 0.49313 0.48891 0.48471 0.4806 0.4765 0.47246 0.4684 0.46442 0.46042 0.45644 0.45251 0.44856 0.44476 0.44102 0.43739 0.43393 0.43065 0.42761 0.42475 0.42221 0.41996 0.41808 0.41655 0.4154 0.41466 0.41429 0.41431 0.41475 0.4156 0.41688 0.41854 0.42062 0.4231 0.4259 0.42907 0.4325 0.43627 0.44016 0.44427 0.44849 0.45282 0.4572 0.46156 0.46601 0.47033 0.47459 0.47869 0.48265 0.48641 0.48996 0.49331 0.49643 0.49944 0.50217 0.50488 0.50737 0.50974 0.51197 0.51406 0.51604 0.51789 0.5196 0.5212 0.52268 0.52401 0.52524 0.52635 0.52735 0.52817 0.52889 0.52946 0.52987 0.53015 0.53026 0.53022 0.53003 0.5297 0.52922 0.52859 0.5278 0.52683 0.5257 0.52439 0.52286 0.5212 0.51937 0.51751 0.51562 0.51371 0.51186 0.50998 0.50809 0.50611 0.50411 0.50193 0.49977 0.49747 0.49524 0.49293 0.49066 0.48837 0.48609 0.4838 0.48151 0.47922 0.47686 0.47448 0.47206 0.46958 0.46709 0.46466 0.46221 0.45979 0.45741 0.45507 0.4528 0.45054 0.44836 0.4462 0.44407 0.442 0.43997 0.43793 0.43599 0.43406 0.43222 0.43043 0.42881 0.42726 0.42589 0.42468 0.42371 0.42305 0.4227 0.42272 0.42314 0.42398 0.42535 0.42721 0.42959 0.43253 0.43607 0.44008 0.4447 0.44972 0.45527 0.46109 0.46728 0.47358 0.48002 0.48639 0.49277 0.49908 0.5053 0.51151 0.51778 0.52408 0.5304 0.53668 0.54248 0.54758 0.55158 0.55437 0.55589 0.55637 0.55628 0.5561 0.55614 0.55677 0.55806 0.56 0.56241 0.56499 0.56745 0.56946 0.5708 0.5715 0.57159 0.57134 0.57087 0.57033 0.56972 0.56901 0.56818 0.56727 0.56631 0.56538 0.56458 0.56398 0.56356 0.56325 0.56295 0.56252 0.56179 0.5606 0.5591 0.55742 0.55583 0.55454 0.55358 0.55303 0.55275 0.55266 0.55266 0.55263 0.5526 0.5525 0.55233 0.55215 0.55183 0.55155 0.55133 0.55126 0.55136 0.55168 0.55229 0.55315 0.55434 0.55587 0.55779 0.56001 0.56261 0.56553 0.56863 0.57189 0.57534 0.57886 0.58236 0.58597 0.58958 0.59313 0.59674 0.60024 0.60386 0.60751 0.61122 0.61507 0.61896 0.62306 0.62724 0.63161 0.63589 0.64016 0.64424 0.64825 0.6522 0.65602 0.65974 0.66342 0.66693 0.67042 0.6738 0.67706 0.68022 0.68322 0.68611 0.68879 0.69126 0.69356 0.69557 0.69724 0.69871 0.69979 0.70076 0.70141 0.70174 0.70179 0.70165 0.70117 0.70064
-0.0050919 -0.0051836 -0.005263 -0.0053094 -0.0053003 -0.0052597 -0.0051312 -0.0049225 -0.0045998 -0.0041292 -0.0034714 -0.0026593 -0.0015631 -0.000179 0.0015309 0.0035766 0.0059547 0.0086723 0.011792 0.015149 0.018774 0.022675 0.026755 0.031015 0.035318 0.039689 0.044144 0.048469 0.0527 0.056886 0.060902 0.064738 0.068357 0.071777 0.075097 0.078214 0.081216 0.084197 0.08712 0.090052 0.092963 0.095808 0.098643 0.10129 0.1038 0.10609 0.1081 0.10981 0.11124 0.11231 0.1131 0.11352 0.11363 0.11337 0.11276 0.11178 0.11044 0.10877 0.10678 0.10457 0.10222 0.099714 0.097221 0.094758 0.092355 0.090093 0.087923 0.085961 0.084151 0.082487 0.081017 0.079702 0.078523 0.07751 0.076594 0.075817 0.075124 0.074506 0.073966 0.073481 0.073023 0.072601 0.072198 0.071802 0.071398 0.070978 0.070543 0.070068 0.069562 0.069027 0.068453 0.067874 0.067294 0.066717 0.06617 0.065681 0.06524 0.064883 0.0646 0.06443 0.064354 0.064403 0.064567 0.064879 0.065318 0.065904 0.066669 0.067594 0.068696 0.069991 0.071468 0.073177 0.075061 0.077148 0.079503 0.082011 0.084745 0.087664 0.090744 0.094023 0.097397 0.10086 0.10449 0.10813 0.11182 0.11551 0.11917 0.12288 0.12643 0.12989 0.13328 0.13652 0.13969 0.14273 0.14568 0.14864 0.15149 0.15432 0.15718 0.1602 0.16349 0.16709 0.17106 0.17561 0.18055 0.18608 0.19204 0.19851 0.20567 0.21328 0.22154 0.23042 0.23979 0.24982 0.26008 0.2706 0.28152 0.29229 0.30311 0.31369 0.32393 0.334 0.34341 0.3523 0.36064 0.36819 0.37519 0.38127 0.38669 0.39145 0.39552 0.399 0.40193 0.40441 0.40653 0.40829 0.40974 0.41099 0.41198 0.41281 0.41346 0.41393 0.41425 0.41439 0.41437 0.41414 0.41377 0.41321 0.41253 0.41172 0.41082 0.40984 0.40874 0.40758 0.40638 0.40512 0.40378 0.40237 0.4009 0.3994 0.39782 0.39634 0.39471 0.39311 0.39152 0.38989 0.38831 0.38675 0.38523 0.38376 0.38231 0.38094 0.37966 0.37843 0.37723 0.3762 0.37524 0.37439 0.37359 0.37287 0.3722 0.37162 0.37107 0.37056 0.37008 0.36966 0.36927 0.36888 0.3685 0.36813 0.36777 0.3674 0.36701 0.36657 0.36608 0.3655 0.36484 0.36411 0.36324 0.36228 0.36119 0.35998 0.35866 0.35718 0.35559 0.35385 0.35199 0.35005 0.34792 0.34574 0.34347 0.34115 0.3388 0.33637 0.33395 0.3315 0.32908 0.32669 0.32426 0.32192 0.31958 0.31727 0.31501 0.31276 0.31059 0.30844 0.30634 0.3043 0.30229 0.30035 0.29849 0.2967 0.295 0.29336 0.29183 0.29042 0.28914 0.28801 0.28703 0.28622 0.28556 0.28505 0.28469 0.28449 0.28447 0.28472 0.28528 0.2862 0.28759 0.28937 0.29166 0.2944 0.29757 0.30122 0.30509 0.30915 0.31316 0.31703 0.32071 0.32401 0.32699 0.32947 0.33151 0.33315 0.33437 0.33535 0.33613 0.33683 0.33747 0.33811 0.33873 0.3393 0.33978 0.34013 0.34031 0.34029 0.34013 0.33994 0.33983 0.33991 0.34025 0.34082 0.34162 0.34254 0.34351 0.34446 0.34531 0.34605 0.34669 0.34719 0.34755 0.34777 0.34787 0.34785 0.34774 0.34759 0.34741 0.34714 0.34675 0.34619 0.34543 0.34447 0.34333 0.34201 0.34051 0.3389 0.33718 0.33538 0.33355 0.33167 0.32983 0.32802 0.32628 0.32464 0.32309 0.32165 0.32029 0.319 0.31776 0.31652 0.31525 0.31391 0.31252 0.31104 0.3095 0.30789 0.30617 0.30453 0.30272 0.30093 0.29918 0.2975 0.29599 0.29466 0.29357 0.29278 0.29234 0.29219 0.2924 0.293 0.29398 0.29532 0.29709 0.29927 0.30191 0.30525 0.30924 0.314 0.31955 0.32594 0.33324 0.3415 0.35106 0.36167 0.3736 0.38667 0.40076 0.41589 0.4316 0.44808 0.46464 0.48129 0.49753 0.51313 0.52807 0.5418 0.55472 0.56642 0.57705 0.58658 0.59501 0.60249 0.60865 0.61381 0.61772 0.6204 0.62185 0.62216 0.62143 0.6197 0.61715 0.61401 0.61031 0.60625 0.60196 0.59748 0.59294 0.58829 0.58366 0.57907 0.5745 0.57001 0.56552 0.56112 0.55671 0.55235 0.548 0.5437 0.5394 0.53509 0.53088 0.5266 0.5225 0.51841 0.51446 0.51072 0.50715 0.50382 0.5007 0.49794 0.49546 0.49336 0.49166 0.49037 0.48953 0.48906 0.48906 0.48952 0.49043 0.49177 0.49356 0.4958 0.49849 0.50151 0.50494 0.50866 0.5127 0.51689 0.52128 0.52577 0.53039 0.53508 0.53975 0.54448 0.54906 0.55362 0.55795 0.56216 0.56617 0.56992 0.57346 0.57672 0.57987 0.58279 0.58559 0.58818 0.59066 0.59301 0.5952 0.59725 0.59916 0.60093 0.60259 0.60411 0.6055 0.60681 0.60793 0.60902 0.60989 0.61064 0.61124 0.61171 0.61203 0.61216 0.61215 0.61199 0.61167 0.61119 0.61054 0.60971 0.6087 0.6075 0.60609 0.60449 0.60274 0.60082 0.59887 0.59688 0.59491 0.59298 0.59109 0.58916 0.58711 0.58501 0.58275 0.58046 0.57802 0.57562 0.57318 0.57076 0.56834 0.56588 0.56348 0.56104 0.55859 0.55609 0.55357 0.55096 0.54837 0.54573 0.54311 0.54049 0.53791 0.53537 0.53289 0.53045 0.52807 0.52575 0.52348 0.52122 0.51901 0.51685 0.51469 0.51259 0.51053 0.50855 0.50667 0.50495 0.50334 0.50188 0.50065 0.49972 0.4991 0.49881 0.49898 0.4996 0.50071 0.50237 0.50456 0.50739 0.51074 0.5148 0.51934 0.52451 0.53016 0.53633 0.54275 0.54961 0.55652 0.56361 0.57059 0.57757 0.58443 0.59125 0.59803 0.60475 0.61148 0.61817 0.62477 0.63092 0.63635 0.64065 0.64374 0.64563 0.6465 0.64687 0.64714 0.64771 0.6489 0.65074 0.65327 0.65618 0.6592 0.66188 0.66392 0.66503 0.66538 0.66501 0.66435 0.66349 0.66276 0.662 0.66121 0.66048 0.65961 0.65885 0.65808 0.65751 0.65717 0.65717 0.65726 0.65737 0.65727 0.65672 0.65556 0.6539 0.65195 0.65001 0.64846 0.64731 0.64668 0.64639 0.64633 0.6464 0.64645 0.64648 0.6464 0.64632 0.64617 0.64593 0.64572 0.64557 0.64555 0.64563 0.64598 0.64659 0.64744 0.64868 0.65025 0.65215 0.65449 0.6571 0.66005 0.66323 0.66654 0.66997 0.67357 0.67713 0.6807 0.6843 0.68795 0.69154 0.69515 0.69874 0.70243 0.70615 0.71007 0.71406 0.71825 0.72246 0.72673 0.731 0.73526 0.73941 0.74358 0.74747 0.75131 0.75503 0.75871 0.76219 0.76572 0.76906 0.77233 0.77545 0.77841 0.78134 0.78395 0.78649 0.7888 0.79087 0.79265 0.79417 0.79543 0.79636 0.797 0.79725 0.79729 0.7971 0.7967 0.79606
-0.0090073 -0.0090942 -0.0091683 -0.0092118 -0.0091938 -0.0091447 -0.0090338 -0.0088278 -0.0084942 -0.0080357 -0.0073886 -0.0065755 -0.0055058 -0.0041437 -0.0024646 -0.0004491 0.0018908 0.0045591 0.0076232 0.010923 0.014496 0.01833 0.022337 0.02652 0.030747 0.035036 0.039408 0.043655 0.047812 0.051913 0.055847 0.059606 0.063148 0.066497 0.069737 0.072786 0.075721 0.078643 0.081507 0.084367 0.087213 0.090003 0.092775 0.095376 0.097832 0.10009 0.10207 0.10374 0.10515 0.10622 0.107 0.10742 0.10755 0.1073 0.10672 0.10576 0.10447 0.10284 0.1009 0.098748 0.096447 0.094003 0.091571 0.089162 0.086805 0.084599 0.082481 0.080559 0.078788 0.077161 0.075724 0.074432 0.073284 0.072296 0.071405 0.070645 0.069968 0.069365 0.068837 0.068359 0.06791 0.067501 0.067106 0.066713 0.066322 0.065902 0.065475 0.065004 0.064506 0.063978 0.063419 0.062847 0.062275 0.061702 0.061166 0.060681 0.060247 0.0599 0.059621 0.059449 0.059369 0.059411 0.059565 0.059858 0.060281 0.060849 0.061592 0.062488 0.063555 0.064809 0.066247 0.0679 0.069733 0.071761 0.074052 0.076495 0.07915 0.081993 0.084989 0.088175 0.091453 0.094818 0.098349 0.10188 0.10547 0.10906 0.1126 0.11619 0.11965 0.12301 0.12632 0.12945 0.13254 0.13548 0.13835 0.14122 0.14399 0.14676 0.14957 0.15247 0.15564 0.1591 0.16295 0.16736 0.17216 0.17752 0.18331 0.1896 0.19656 0.20397 0.21201 0.22064 0.2298 0.23958 0.24961 0.25989 0.27058 0.28115 0.29178 0.30218 0.31225 0.32217 0.33149 0.34023 0.34848 0.35594 0.36288 0.3689 0.37426 0.37897 0.38299 0.38644 0.38933 0.39179 0.39387 0.39559 0.39702 0.39825 0.39922 0.40003 0.40067 0.40113 0.40144 0.40156 0.40152 0.4013 0.40092 0.40037 0.39969 0.3989 0.39801 0.39705 0.396 0.39487 0.39366 0.39241 0.3911 0.38972 0.38831 0.38682 0.38527 0.38379 0.38216 0.38057 0.37897 0.37735 0.37576 0.37418 0.37264 0.37116 0.3697 0.36833 0.36702 0.3658 0.36462 0.36356 0.36261 0.36177 0.36097 0.36026 0.35959 0.35903 0.3585 0.35802 0.35756 0.35712 0.35672 0.35633 0.35595 0.35559 0.35523 0.35486 0.35447 0.35402 0.35352 0.35295 0.3523 0.35156 0.35068 0.34973 0.34864 0.34742 0.34611 0.34462 0.34304 0.34132 0.33948 0.33752 0.33542 0.33326 0.33101 0.3287 0.32637 0.32396 0.32157 0.31916 0.31675 0.31438 0.31197 0.30964 0.30732 0.30505 0.30281 0.30058 0.29843 0.2963 0.29421 0.2922 0.29021 0.28829 0.28644 0.28466 0.28296 0.28133 0.27981 0.2784 0.27712 0.27598 0.27498 0.27416 0.27348 0.27293 0.27254 0.27231 0.27226 0.27247 0.273 0.27386 0.27519 0.27693 0.27914 0.28181 0.2849 0.28846 0.29224 0.29621 0.30012 0.3039 0.30749 0.31072 0.31363 0.31604 0.31803 0.31962 0.3208 0.32175 0.3225 0.32316 0.32379 0.32438 0.32498 0.32553 0.32599 0.32632 0.32649 0.32647 0.32633 0.32616 0.32607 0.32617 0.32653 0.32711 0.32792 0.32883 0.32978 0.33073 0.33158 0.33231 0.33293 0.33341 0.33378 0.33401 0.33412 0.33411 0.33404 0.33392 0.33375 0.33351 0.33314 0.3326 0.33187 0.33093 0.3298 0.32851 0.32704 0.32544 0.32374 0.32196 0.32016 0.31832 0.31652 0.31473 0.31303 0.3114 0.30989 0.30846 0.30712 0.30587 0.30464 0.30341 0.30217 0.30086 0.29949 0.29803 0.29651 0.29491 0.29323 0.29162 0.28985 0.28808 0.28635 0.2847 0.28321 0.2819 0.28085 0.28006 0.27959 0.27945 0.27964 0.28021 0.28113 0.28243 0.28412 0.28621 0.28876 0.292 0.29586 0.30048 0.30587 0.31208 0.3192 0.32724 0.33654 0.34691 0.35854 0.37134 0.38518 0.40002 0.41544 0.43173 0.44803 0.46452 0.4806 0.49611 0.51098 0.52465 0.53756 0.54931 0.56003 0.56956 0.57804 0.58557 0.59183 0.59701 0.60099 0.60366 0.60512 0.60546 0.60474 0.60294 0.60035 0.5971 0.59333 0.58923 0.58486 0.58027 0.57567 0.57096 0.5663 0.56163 0.55705 0.55249 0.54798 0.54355 0.53909 0.53472 0.53033 0.526 0.52168 0.51736 0.51313 0.50887 0.50475 0.50066 0.49677 0.49302 0.48945 0.48611 0.48302 0.48027 0.47787 0.47582 0.47413 0.47288 0.47206 0.47166 0.47168 0.47212 0.47302 0.47439 0.47619 0.47845 0.48114 0.48419 0.48763 0.49133 0.49537 0.49956 0.50397 0.5085 0.51311 0.51778 0.52245 0.52716 0.53175 0.53633 0.54069 0.54494 0.54894 0.55273 0.55631 0.55966 0.56286 0.56581 0.56866 0.57132 0.57384 0.57621 0.57844 0.58055 0.58249 0.58432 0.58603 0.58759 0.58897 0.59025 0.59143 0.59245 0.59333 0.59406 0.59464 0.59511 0.5954 0.5955 0.59544 0.59525 0.5949 0.59434 0.59365 0.59277 0.59171 0.59046 0.58903 0.58737 0.58552 0.58356 0.58155 0.5795 0.57744 0.57546 0.5735 0.57147 0.56941 0.56722 0.56491 0.56254 0.56005 0.55758 0.55506 0.55257 0.55005 0.54764 0.54515 0.54269 0.54019 0.53767 0.53509 0.53248 0.52984 0.52716 0.52456 0.52191 0.51934 0.51679 0.51426 0.51179 0.50941 0.50704 0.50474 0.50249 0.50026 0.49808 0.49589 0.49382 0.49173 0.48977 0.48793 0.48617 0.48455 0.48309 0.48187 0.48092 0.48026 0.47995 0.48005 0.48064 0.48166 0.48328 0.4854 0.48815 0.49142 0.49538 0.49989 0.50502 0.51059 0.51673 0.52314 0.52996 0.53686 0.54394 0.55094 0.55794 0.56482 0.57169 0.57851 0.58531 0.59217 0.59897 0.60562 0.61183 0.61738 0.6218 0.62495 0.62678 0.6277 0.62797 0.62823 0.62882 0.63003 0.63186 0.6344 0.63737 0.64047 0.64318 0.64525 0.6464 0.64667 0.64625 0.64558 0.64472 0.64392 0.64314 0.64236 0.64154 0.64062 0.6397 0.63884 0.63825 0.63787 0.63775 0.63781 0.63789 0.63775 0.63716 0.63597 0.63429 0.63227 0.63029 0.62874 0.62755 0.62686 0.62653 0.62647 0.6265 0.62655 0.62658 0.62649 0.62636 0.6262 0.62594 0.62571 0.62553 0.62548 0.62557 0.62592 0.62654 0.6274 0.62866 0.63028 0.6323 0.63466 0.6373 0.64031 0.64347 0.64687 0.65032 0.65396 0.65756 0.66131 0.6649 0.66861 0.67229 0.67601 0.6797 0.68349 0.68729 0.69122 0.69534 0.69961 0.70393 0.70834 0.71268 0.7171 0.72135 0.72553 0.72953 0.73345 0.73729 0.74107 0.74469 0.74817 0.75165 0.75496 0.75816 0.76128 0.76429 0.76706 0.76963 0.77197 0.77417 0.77592 0.77739 0.77854 0.7795 0.78011 0.78049 0.78051 0.78026 0.77976 0.77908
-0.009682 -0.0097501 -0.0098122 -0.0098401 -0.0098126 -0.0097596 -0.0096293 -0.0094091 -0.009069 -0.0085955 -0.0079262 -0.0070969 -0.0060042 -0.0046287 -0.0029244 -0.0008995 0.0014487 0.0041238 0.0071766 0.010446 0.013985 0.017774 0.021723 0.025832 0.029987 0.034199 0.038484 0.042648 0.046727 0.050761 0.054631 0.058339 0.061839 0.065153 0.068366 0.071387 0.074299 0.077179 0.079998 0.082798 0.085572 0.088271 0.090951 0.093456 0.095813 0.097961 0.09983 0.10141 0.10273 0.10371 0.10441 0.10477 0.10484 0.10455 0.10396 0.10301 0.10174 0.10015 0.09828 0.096214 0.094011 0.091677 0.089351 0.087041 0.084794 0.082675 0.080642 0.078798 0.077092 0.075522 0.074126 0.072875 0.071764 0.0708 0.069929 0.069188 0.068531 0.067943 0.06743 0.066966 0.066537 0.066144 0.065768 0.065399 0.065027 0.064633 0.064227 0.063779 0.063299 0.06279 0.062244 0.061688 0.061132 0.060576 0.060058 0.059593 0.059164 0.058825 0.058557 0.058395 0.058325 0.058381 0.058539 0.058842 0.059268 0.059845 0.060585 0.061487 0.062551 0.063801 0.06523 0.06687 0.068694 0.070704 0.072975 0.075399 0.078031 0.080849 0.083815 0.08698 0.090232 0.093564 0.097066 0.10057 0.10412 0.10768 0.11118 0.11471 0.11812 0.12143 0.12468 0.12778 0.13081 0.13371 0.13653 0.13935 0.14207 0.14478 0.14754 0.1504 0.15349 0.15688 0.16067 0.16501 0.16972 0.17498 0.18068 0.18686 0.1937 0.20096 0.20882 0.21728 0.22622 0.23573 0.24551 0.2555 0.26588 0.27613 0.28641 0.29647 0.3062 0.31578 0.32474 0.33318 0.3411 0.34828 0.35494 0.36071 0.36587 0.37041 0.37429 0.37763 0.38045 0.38282 0.38485 0.38654 0.38795 0.38914 0.3901 0.39091 0.39154 0.39201 0.39233 0.39248 0.39244 0.39224 0.39188 0.39135 0.39071 0.38997 0.38913 0.38823 0.38725 0.38621 0.38509 0.38388 0.38266 0.38136 0.38001 0.3786 0.37711 0.37568 0.37412 0.37257 0.37099 0.36939 0.36783 0.36626 0.36473 0.36325 0.36182 0.36046 0.35918 0.35794 0.35674 0.35567 0.3547 0.35385 0.35305 0.35232 0.35166 0.35111 0.35056 0.35004 0.34955 0.34908 0.34867 0.34826 0.34789 0.34752 0.34713 0.34677 0.34636 0.34592 0.34544 0.34489 0.34424 0.34352 0.34267 0.34174 0.34068 0.33952 0.33824 0.33682 0.33529 0.33363 0.33185 0.32997 0.32794 0.32587 0.3237 0.32149 0.31925 0.31693 0.31463 0.31232 0.31002 0.30775 0.30545 0.30321 0.301 0.29882 0.29669 0.29457 0.2925 0.29048 0.2885 0.28658 0.28469 0.28287 0.28112 0.27944 0.27783 0.27631 0.27488 0.27357 0.2724 0.27137 0.27048 0.26976 0.26919 0.26876 0.26849 0.26836 0.2684 0.2687 0.2693 0.27019 0.27153 0.27322 0.27536 0.27792 0.28085 0.2842 0.28777 0.29151 0.29515 0.29866 0.30198 0.30492 0.30757 0.30973 0.3115 0.31292 0.31397 0.31483 0.31554 0.31618 0.31678 0.3174 0.31801 0.31859 0.31906 0.31941 0.31963 0.31968 0.31962 0.31954 0.31955 0.3197 0.32009 0.32065 0.32139 0.32223 0.32308 0.3239 0.32462 0.32524 0.32576 0.32617 0.32648 0.32667 0.32677 0.32677 0.32672 0.32663 0.3265 0.32629 0.32597 0.32548 0.32479 0.32392 0.32286 0.32166 0.32027 0.31876 0.31715 0.31546 0.31376 0.312 0.31028 0.30858 0.30696 0.30543 0.30398 0.30263 0.30135 0.30014 0.29897 0.29779 0.2966 0.29534 0.29403 0.29265 0.29119 0.28968 0.28807 0.28652 0.28483 0.28315 0.28151 0.27994 0.27853 0.2773 0.27631 0.27559 0.27518 0.27508 0.2753 0.27587 0.27682 0.27811 0.27976 0.2818 0.28429 0.28747 0.29125 0.2958 0.30109 0.30718 0.31415 0.32202 0.33114 0.34124 0.35265 0.36514 0.37865 0.39315 0.40822 0.42412 0.44007 0.45616 0.47189 0.487 0.50154 0.51491 0.52752 0.53895 0.54935 0.55867 0.56693 0.57423 0.58026 0.58531 0.58913 0.5917 0.59309 0.59333 0.59259 0.59081 0.58824 0.58507 0.58139 0.57733 0.57305 0.56859 0.56408 0.55949 0.55496 0.55042 0.54594 0.54153 0.53716 0.53287 0.52853 0.52434 0.52011 0.51591 0.51175 0.50757 0.50347 0.49932 0.49534 0.49138 0.48759 0.48394 0.48046 0.47724 0.47421 0.47154 0.46915 0.46713 0.46546 0.46423 0.4634 0.46297 0.46295 0.4634 0.46426 0.46557 0.46732 0.4695 0.47207 0.47499 0.47832 0.48187 0.48578 0.48982 0.49409 0.49843 0.5029 0.50744 0.51196 0.51651 0.52092 0.52534 0.52954 0.5336 0.53745 0.54104 0.54444 0.5476 0.55063 0.5534 0.55609 0.55856 0.56093 0.56316 0.56525 0.56722 0.56903 0.57074 0.57232 0.57381 0.57514 0.57638 0.57745 0.57845 0.57931 0.58004 0.5806 0.58104 0.58132 0.58146 0.58143 0.58127 0.58091 0.58042 0.57976 0.57893 0.57794 0.57675 0.57539 0.57381 0.57211 0.57028 0.56837 0.56645 0.56454 0.56266 0.5608 0.55893 0.55697 0.55492 0.55274 0.55054 0.54821 0.54591 0.54357 0.54122 0.53888 0.53657 0.53425 0.53192 0.52959 0.52716 0.52473 0.52223 0.51973 0.51715 0.51466 0.51211 0.50966 0.5072 0.50482 0.50245 0.50022 0.49798 0.49578 0.49366 0.49153 0.48944 0.48733 0.48534 0.48339 0.48151 0.47969 0.47802 0.47646 0.47511 0.47394 0.47303 0.4724 0.47218 0.47236 0.47298 0.47407 0.47568 0.47779 0.48054 0.48379 0.48768 0.49208 0.49706 0.50244 0.50833 0.51451 0.52102 0.52759 0.53425 0.54088 0.54746 0.55397 0.56042 0.56678 0.57316 0.57956 0.58595 0.59223 0.59798 0.60312 0.60715 0.60998 0.61163 0.61224 0.61246 0.61254 0.61288 0.61385 0.61545 0.61767 0.62026 0.62308 0.62561 0.62763 0.62889 0.62947 0.62942 0.62898 0.62844 0.62786 0.6272 0.62659 0.62578 0.62493 0.62414 0.62335 0.62272 0.6222 0.62194 0.62185 0.62178 0.62152 0.62088 0.61973 0.61822 0.61642 0.6147 0.61331 0.61224 0.61161 0.61128 0.61116 0.61118 0.61119 0.61112 0.61101 0.61087 0.61065 0.61038 0.61015 0.60994 0.60987 0.60999 0.61031 0.61086 0.6117 0.61291 0.61441 0.61629 0.61851 0.62108 0.62398 0.62707 0.63035 0.6337 0.6372 0.64069 0.64423 0.64781 0.65143 0.65503 0.65871 0.66232 0.66609 0.66984 0.67372 0.67776 0.68201 0.6863 0.69069 0.695 0.6994 0.70361 0.70777 0.71179 0.71577 0.71957 0.72336 0.72695 0.73051 0.73387 0.73724 0.74052 0.74353 0.74659 0.74933 0.75191 0.75422 0.75642 0.75816 0.75965 0.76088 0.76187 0.76255 0.7629 0.76294 0.76277 0.76232 0.76173
-0.027154 -0.027197 -0.027242 -0.027264 -0.027241 -0.027196 -0.027095 -0.026929 -0.026652 -0.026277 -0.025733 -0.02508 -0.024201 -0.023103 -0.021746 -0.020139 -0.01828 -0.01615 -0.013711 -0.011093 -0.0082707 -0.0052263 -0.0020514 0.0012512 0.0045856 0.0079732 0.011418 0.014746 0.018005 0.02123 0.02432 0.027279 0.030082 0.032746 0.035355 0.037815 0.040179 0.042525 0.044817 0.0471 0.049341 0.051518 0.053684 0.055716 0.057632 0.059396 0.06094 0.062254 0.063363 0.06418 0.064771 0.065072 0.065142 0.064923 0.064454 0.063716 0.062735 0.061529 0.060109 0.058554 0.056901 0.055147 0.053397 0.051663 0.049968 0.048359 0.046809 0.045391 0.044088 0.042876 0.04181 0.040856 0.040004 0.039278 0.03862 0.038066 0.037575 0.037138 0.036756 0.036407 0.036078 0.035774 0.03548 0.035184 0.034879 0.034562 0.034225 0.033858 0.033462 0.033048 0.03261 0.032156 0.031705 0.031259 0.030839 0.030461 0.030121 0.029844 0.029623 0.029495 0.029441 0.029486 0.029615 0.029859 0.030211 0.030675 0.031284 0.032011 0.032877 0.033899 0.035075 0.036419 0.03791 0.039558 0.041425 0.043416 0.045578 0.047883 0.050321 0.052912 0.05558 0.058301 0.061164 0.064017 0.066907 0.069794 0.072639 0.075516 0.078268 0.080946 0.083564 0.08607 0.088519 0.09085 0.093103 0.095351 0.097512 0.099649 0.10181 0.10406 0.10652 0.10922 0.11223 0.11572 0.11954 0.12386 0.12858 0.13371 0.13943 0.14547 0.15211 0.15927 0.16684 0.17495 0.18329 0.19186 0.2008 0.20968 0.21863 0.22743 0.23598 0.24441 0.25235 0.25982 0.26688 0.27327 0.27921 0.28437 0.28898 0.29302 0.29646 0.29943 0.30192 0.30401 0.30579 0.30726 0.30848 0.30951 0.31034 0.31103 0.31156 0.31195 0.31221 0.31231 0.31226 0.31205 0.3117 0.3112 0.31058 0.30986 0.30906 0.30819 0.30723 0.3062 0.30513 0.304 0.30283 0.30157 0.30031 0.29899 0.29762 0.29633 0.29491 0.29347 0.29206 0.29065 0.28927 0.28792 0.28662 0.28533 0.28409 0.28292 0.28181 0.28077 0.27974 0.27883 0.27803 0.27733 0.27667 0.27609 0.27555 0.27508 0.27464 0.27424 0.27385 0.2735 0.27318 0.27288 0.27257 0.27228 0.27197 0.27166 0.27131 0.27094 0.27051 0.27002 0.26945 0.26882 0.26808 0.26727 0.26634 0.26532 0.26419 0.26292 0.26156 0.26008 0.2585 0.25683 0.25502 0.25316 0.25122 0.24923 0.24722 0.24514 0.24308 0.241 0.23893 0.23688 0.23482 0.23281 0.23082 0.22887 0.22697 0.22505 0.22322 0.2214 0.21962 0.2179 0.2162 0.21456 0.21297 0.21144 0.20997 0.20855 0.20723 0.20599 0.20487 0.20386 0.20295 0.20217 0.20152 0.20098 0.20055 0.20027 0.20014 0.2002 0.20052 0.2011 0.20202 0.20325 0.20486 0.20682 0.2091 0.21173 0.21453 0.21748 0.22036 0.22314 0.2257 0.22793 0.22985 0.23134 0.23249 0.23336 0.23393 0.23437 0.23473 0.23505 0.23539 0.23576 0.23616 0.23657 0.23695 0.23731 0.23764 0.23793 0.23819 0.2385 0.23889 0.23939 0.24003 0.24077 0.2416 0.24242 0.24322 0.24394 0.24453 0.24503 0.24545 0.24579 0.24608 0.24633 0.24658 0.24678 0.24698 0.24716 0.2473 0.24734 0.24724 0.24697 0.24649 0.2458 0.24493 0.2439 0.24268 0.24135 0.23993 0.23845 0.23694 0.23539 0.23389 0.23242 0.231 0.22967 0.2284 0.22723 0.22613 0.22509 0.2241 0.2231 0.22208 0.22101 0.21989 0.21869 0.21746 0.21613 0.21473 0.21339 0.21191 0.21045 0.20901 0.20763 0.2064 0.20532 0.20447 0.20384 0.20347 0.20338 0.20356 0.20405 0.20486 0.20596 0.20738 0.20915 0.21129 0.214 0.21724 0.22112 0.22565 0.2309 0.23691 0.24369 0.2516 0.26041 0.2703 0.28125 0.29316 0.30601 0.31941 0.33362 0.34796 0.36251 0.37678 0.39056 0.40385 0.41616 0.42777 0.43837 0.44805 0.45674 0.46446 0.47129 0.47696 0.48166 0.48518 0.48754 0.48872 0.48882 0.4879 0.48601 0.48335 0.48013 0.47641 0.47241 0.46818 0.46378 0.45937 0.4549 0.45047 0.44607 0.44174 0.43746 0.43321 0.42907 0.42491 0.42084 0.41675 0.41276 0.40877 0.40479 0.40092 0.39705 0.39332 0.38964 0.38613 0.38276 0.37957 0.37663 0.3739 0.3715 0.36935 0.36755 0.3661 0.36505 0.36439 0.3641 0.36418 0.3647 0.3656 0.36691 0.3686 0.37072 0.37318 0.37597 0.37911 0.38246 0.38613 0.3899 0.39389 0.39794 0.40209 0.40632 0.41052 0.41478 0.41892 0.42309 0.42711 0.43103 0.43481 0.43842 0.44188 0.44515 0.44832 0.45129 0.45417 0.45687 0.45945 0.46187 0.46419 0.46636 0.46836 0.47023 0.47197 0.47357 0.47498 0.47632 0.47748 0.47851 0.47938 0.48013 0.48071 0.48113 0.4814 0.4815 0.48143 0.48118 0.48079 0.48023 0.47952 0.4786 0.47758 0.47633 0.47491 0.4733 0.47153 0.46961 0.46762 0.46557 0.46348 0.4614 0.45933 0.45719 0.45498 0.45278 0.45044 0.44813 0.4457 0.4433 0.44084 0.43837 0.43593 0.4335 0.43109 0.42866 0.42627 0.42382 0.42139 0.41893 0.41646 0.41399 0.41158 0.40917 0.40682 0.40448 0.40219 0.39996 0.3978 0.39568 0.39358 0.39156 0.38953 0.38756 0.3856 0.38375 0.38191 0.38017 0.37854 0.37701 0.37562 0.37439 0.37332 0.37247 0.3719 0.37163 0.3717 0.37218 0.37305 0.37441 0.3762 0.37851 0.38129 0.38468 0.38847 0.39282 0.39758 0.40281 0.40831 0.41417 0.42011 0.42618 0.43218 0.43822 0.44415 0.45004 0.45594 0.4619 0.46803 0.47413 0.48017 0.48579 0.49069 0.49442 0.49684 0.49799 0.49809 0.49759 0.49694 0.49652 0.49664 0.49743 0.49887 0.50088 0.50318 0.50549 0.50769 0.50944 0.51076 0.51162 0.51206 0.51224 0.51216 0.51189 0.51131 0.51061 0.50973 0.50871 0.50763 0.50658 0.5056 0.5047 0.50393 0.50318 0.50233 0.5014 0.50024 0.49894 0.49764 0.49648 0.49553 0.49488 0.49451 0.49432 0.49427 0.49427 0.4943 0.49425 0.49417 0.49401 0.49383 0.49352 0.49326 0.49306 0.49303 0.49312 0.49346 0.49411 0.49499 0.49621 0.49779 0.49974 0.50206 0.50471 0.50768 0.5108 0.51422 0.51772 0.5213 0.52496 0.52868 0.53234 0.5361 0.53982 0.54359 0.54735 0.5512 0.55504 0.5591 0.56328 0.56761 0.57195 0.57637 0.58071 0.58509 0.58935 0.59352 0.59745 0.60132 0.60509 0.60879 0.61241 0.61603 0.6195 0.62296 0.62628 0.62938 0.63243 0.63528 0.63784 0.64027 0.64243 0.6443 0.64588 0.64716 0.6482 0.64891 0.64932 0.64944 0.64933 0.64894 0.6484
-0.027838 -0.02787 -0.027908 -0.027927 -0.027896 -0.02785 -0.027751 -0.027575 -0.027311 -0.026926 -0.026396 -0.025745 -0.024872 -0.023791 -0.022452 -0.020858 -0.019017 -0.016905 -0.014491 -0.011891 -0.0090817 -0.0060562 -0.0028977 0.0003976 0.003729 0.0071027 0.010548 0.013882 0.017141 0.020369 0.023467 0.026435 0.029236 0.031905 0.034514 0.036978 0.03934 0.041687 0.043982 0.046265 0.048518 0.050711 0.052883 0.054925 0.056856 0.058633 0.060184 0.061499 0.062615 0.063438 0.064039 0.064344 0.064414 0.064202 0.063726 0.062977 0.061985 0.060762 0.059314 0.057734 0.056048 0.054271 0.052496 0.050736 0.049013 0.047387 0.045821 0.044397 0.043083 0.041868 0.040801 0.039842 0.038993 0.038265 0.037609 0.037057 0.036562 0.036123 0.035745 0.035396 0.035068 0.034764 0.034467 0.034171 0.033872 0.033556 0.033226 0.032863 0.032478 0.032073 0.03164 0.031198 0.030757 0.030315 0.029907 0.029538 0.029207 0.02894 0.028733 0.028613 0.028568 0.028611 0.02875 0.029002 0.029358 0.02983 0.030437 0.031177 0.032051 0.033071 0.03424 0.035586 0.037079 0.038724 0.040583 0.042567 0.044723 0.04702 0.049442 0.052011 0.054661 0.057369 0.060204 0.06303 0.065908 0.068776 0.071606 0.07446 0.077208 0.079881 0.082503 0.085002 0.087456 0.089803 0.092087 0.094362 0.096552 0.098728 0.10093 0.10322 0.10573 0.10847 0.11152 0.11506 0.11893 0.12328 0.12803 0.13322 0.13897 0.14506 0.15171 0.15889 0.16649 0.1746 0.18293 0.19147 0.20039 0.20922 0.21812 0.22685 0.23532 0.24368 0.25155 0.25897 0.26598 0.27232 0.27823 0.28336 0.28796 0.292 0.29546 0.29844 0.30095 0.30307 0.30489 0.30639 0.30764 0.30871 0.30957 0.31029 0.31085 0.31127 0.31155 0.31168 0.31166 0.31149 0.31118 0.31071 0.31013 0.30944 0.30866 0.3078 0.30686 0.30585 0.3048 0.30368 0.30252 0.30129 0.30003 0.29875 0.29739 0.29612 0.2947 0.29332 0.29197 0.29059 0.28926 0.28794 0.28666 0.28542 0.28419 0.28306 0.28198 0.28094 0.27995 0.27907 0.27827 0.27756 0.2769 0.27632 0.27577 0.27528 0.27483 0.27442 0.27403 0.27365 0.27334 0.27302 0.2727 0.27241 0.27208 0.27177 0.27142 0.27103 0.27059 0.27009 0.26951 0.26888 0.26812 0.2673 0.26637 0.26534 0.26422 0.26295 0.26159 0.26011 0.25854 0.25686 0.25506 0.25321 0.25127 0.2493 0.24731 0.24524 0.24318 0.24112 0.23906 0.23703 0.23498 0.23299 0.23101 0.22906 0.22716 0.22527 0.22345 0.22164 0.21986 0.21815 0.21646 0.21483 0.21326 0.21173 0.21026 0.20887 0.20755 0.20632 0.2052 0.20418 0.20328 0.20249 0.20183 0.20127 0.20085 0.20056 0.20042 0.20048 0.2008 0.20138 0.20232 0.20358 0.20522 0.2072 0.20952 0.2122 0.21505 0.21805 0.22099 0.22381 0.22642 0.22868 0.23066 0.23218 0.23337 0.23427 0.23487 0.23533 0.23566 0.23598 0.2363 0.23667 0.23705 0.23746 0.23785 0.23821 0.23855 0.23883 0.2391 0.2394 0.23978 0.24027 0.24091 0.24166 0.24249 0.24335 0.24416 0.24489 0.24552 0.24603 0.24645 0.24679 0.24708 0.24732 0.24754 0.24773 0.24791 0.24806 0.24818 0.2482 0.24809 0.24778 0.24729 0.24659 0.2457 0.24465 0.24342 0.24208 0.24064 0.23914 0.23762 0.23606 0.23453 0.23304 0.23162 0.23028 0.22901 0.22784 0.22673 0.22569 0.22469 0.22368 0.22267 0.2216 0.22047 0.21928 0.21803 0.2167 0.2153 0.21396 0.21248 0.21101 0.20957 0.2082 0.20698 0.20591 0.20505 0.20443 0.20408 0.204 0.2042 0.20472 0.20555 0.20669 0.20814 0.20994 0.21211 0.21486 0.21814 0.22209 0.2267 0.23201 0.23809 0.24494 0.25291 0.26176 0.27169 0.28265 0.29456 0.30737 0.32076 0.3349 0.34914 0.3636 0.37776 0.39146 0.40469 0.41692 0.42851 0.43909 0.44877 0.45747 0.46521 0.47211 0.47787 0.48267 0.48628 0.48877 0.49009 0.49031 0.48955 0.48781 0.48528 0.48221 0.47862 0.47472 0.47064 0.46634 0.46203 0.45766 0.45333 0.44901 0.44472 0.44054 0.43635 0.43228 0.42817 0.42417 0.42015 0.41617 0.41223 0.4083 0.40447 0.40062 0.39691 0.39325 0.38974 0.38637 0.38318 0.38022 0.37747 0.37502 0.37284 0.37101 0.36949 0.36838 0.36762 0.36724 0.36723 0.36764 0.36844 0.36964 0.37119 0.37317 0.3755 0.37814 0.38112 0.38434 0.38786 0.39152 0.39534 0.39929 0.40331 0.4074 0.41151 0.41566 0.41968 0.42376 0.42765 0.43149 0.43514 0.43866 0.44201 0.44516 0.44825 0.45109 0.45386 0.45649 0.45899 0.46136 0.46357 0.46568 0.46762 0.46948 0.47117 0.47272 0.47413 0.47543 0.47658 0.47762 0.47848 0.47922 0.4798 0.48022 0.4805 0.48063 0.48059 0.48038 0.48 0.47949 0.4788 0.47796 0.47698 0.47579 0.47444 0.47288 0.47119 0.46934 0.46742 0.4654 0.46339 0.4614 0.45939 0.45735 0.45523 0.4531 0.45087 0.44862 0.44626 0.44396 0.44157 0.43922 0.43683 0.43446 0.43211 0.42976 0.42741 0.42503 0.42267 0.42023 0.41785 0.41541 0.41302 0.41065 0.40832 0.40602 0.40377 0.40159 0.39941 0.39733 0.39525 0.39325 0.39126 0.3893 0.38736 0.3855 0.38368 0.38196 0.38031 0.37879 0.37736 0.37611 0.37502 0.37413 0.37352 0.37319 0.37322 0.37364 0.37445 0.37572 0.37742 0.37967 0.38237 0.38565 0.3894 0.3937 0.39839 0.40358 0.40903 0.41484 0.42078 0.42684 0.43285 0.4389 0.44485 0.45076 0.45668 0.46265 0.46877 0.47491 0.48099 0.48661 0.49152 0.49527 0.49774 0.49886 0.499 0.49849 0.49785 0.49749 0.49763 0.49843 0.49988 0.50186 0.5042 0.50651 0.50866 0.51037 0.51162 0.51235 0.51274 0.51282 0.51269 0.51234 0.51177 0.51104 0.51013 0.50911 0.50809 0.50709 0.5062 0.50537 0.50463 0.50391 0.50316 0.50224 0.50114 0.49985 0.49855 0.49738 0.49646 0.49582 0.49545 0.4953 0.4953 0.49533 0.4954 0.49541 0.49536 0.49524 0.49508 0.49484 0.49459 0.49445 0.49443 0.49455 0.49494 0.4956 0.49653 0.49778 0.49937 0.50134 0.50366 0.50632 0.50933 0.51249 0.51586 0.51934 0.52289 0.52651 0.5302 0.53378 0.53748 0.54112 0.54482 0.54847 0.5522 0.55597 0.55995 0.56399 0.56821 0.5725 0.57686 0.58114 0.5854 0.58957 0.59364 0.59751 0.6013 0.60497 0.6086 0.61216 0.61568 0.61904 0.62239 0.62564 0.62878 0.63176 0.63447 0.63696 0.63932 0.64144 0.64324 0.64473 0.646 0.64704 0.64772 0.64811 0.64826 0.64812 0.64779 0.64729
-0.023583 -0.023646 -0.023705 -0.023743 -0.02371 -0.023661 -0.023553 -0.023379 -0.023068 -0.022671 -0.022107 -0.021403 -0.020484 -0.019334 -0.017915 -0.01624 -0.014281 -0.012058 -0.0095113 -0.0067799 -0.0038188 -0.0006319 0.0027059 0.0061907 0.0097229 0.013319 0.016987 0.020551 0.024046 0.027495 0.030789 0.033925 0.036865 0.039629 0.042293 0.04478 0.047163 0.049538 0.051874 0.054219 0.05656 0.058858 0.061165 0.063337 0.065393 0.067295 0.068957 0.070386 0.071599 0.072522 0.073217 0.07361 0.07376 0.073609 0.073171 0.072406 0.071355 0.07001 0.068389 0.066583 0.064638 0.062571 0.060503 0.05845 0.056454 0.054577 0.052781 0.051148 0.049654 0.048276 0.04706 0.045971 0.044997 0.044161 0.043401 0.042757 0.042184 0.04167 0.041218 0.04081 0.04043 0.040076 0.039739 0.039412 0.03908 0.038728 0.038374 0.037985 0.037567 0.037133 0.036667 0.036198 0.035731 0.035265 0.034823 0.034438 0.034088 0.0338 0.033574 0.033444 0.03339 0.033432 0.033567 0.03382 0.034179 0.034657 0.035276 0.036023 0.036909 0.037954 0.039156 0.040531 0.04206 0.043747 0.045658 0.047694 0.049908 0.052272 0.054761 0.057418 0.060149 0.062946 0.06588 0.06881 0.071813 0.074807 0.077762 0.080758 0.083642 0.086454 0.089219 0.091864 0.094462 0.09695 0.099372 0.1018 0.10414 0.10647 0.10883 0.11129 0.11397 0.11691 0.12015 0.12388 0.12792 0.13244 0.13731 0.14256 0.14839 0.15463 0.16141 0.16873 0.17649 0.18481 0.19335 0.20212 0.21125 0.22029 0.22937 0.23827 0.24692 0.25545 0.26346 0.27104 0.2782 0.2847 0.29075 0.29601 0.30072 0.30484 0.30835 0.31135 0.31388 0.316 0.31782 0.31932 0.32058 0.32165 0.32251 0.32324 0.32381 0.32423 0.3245 0.32463 0.3246 0.32439 0.32404 0.32354 0.32293 0.32221 0.32142 0.32057 0.31964 0.31865 0.31761 0.31652 0.31537 0.31415 0.31287 0.31155 0.31015 0.30881 0.3073 0.30583 0.30435 0.30285 0.30136 0.2999 0.29849 0.29714 0.2958 0.29456 0.29336 0.29222 0.29112 0.29015 0.28927 0.28848 0.28776 0.28711 0.28651 0.28599 0.28549 0.28504 0.28462 0.28421 0.28385 0.28351 0.28317 0.28285 0.28253 0.2822 0.28185 0.28146 0.28103 0.28053 0.27997 0.27933 0.27858 0.27774 0.2768 0.27577 0.27464 0.27336 0.27199 0.2705 0.26891 0.26723 0.26541 0.26354 0.2616 0.25961 0.2576 0.25552 0.25347 0.2514 0.24933 0.2473 0.24524 0.24324 0.24125 0.23929 0.23739 0.23549 0.23366 0.23184 0.23008 0.22837 0.22668 0.22506 0.22352 0.22202 0.2206 0.21925 0.21799 0.21684 0.21579 0.21488 0.21409 0.21344 0.21293 0.21252 0.21222 0.21204 0.21201 0.21218 0.2126 0.21331 0.21441 0.21584 0.21769 0.2199 0.22248 0.22547 0.22863 0.23198 0.23527 0.23848 0.24154 0.24429 0.24679 0.24886 0.25059 0.25196 0.25299 0.25381 0.25446 0.25502 0.25554 0.25602 0.25649 0.2569 0.25723 0.25747 0.25755 0.25748 0.25732 0.25714 0.25704 0.2571 0.2574 0.25789 0.25856 0.25934 0.26016 0.26098 0.26171 0.26236 0.26291 0.26334 0.26367 0.26388 0.26399 0.26398 0.26393 0.26381 0.26366 0.26344 0.26311 0.26264 0.26199 0.26117 0.2602 0.25909 0.25782 0.25645 0.25499 0.25348 0.25194 0.25035 0.2488 0.24727 0.24582 0.24443 0.24314 0.24193 0.24077 0.23969 0.23863 0.23758 0.23652 0.23539 0.23421 0.23297 0.23167 0.23032 0.22888 0.22753 0.22601 0.22452 0.22304 0.22165 0.2204 0.2193 0.21842 0.21776 0.21739 0.21727 0.21745 0.21793 0.21874 0.21986 0.22128 0.22305 0.22519 0.22792 0.23122 0.23519 0.23981 0.24515 0.25127 0.25819 0.26623 0.27517 0.28527 0.29642 0.30853 0.32157 0.33521 0.34965 0.36419 0.37896 0.39346 0.4075 0.421 0.43351 0.44536 0.45616 0.46601 0.47488 0.48277 0.48978 0.4956 0.50044 0.5041 0.50658 0.50788 0.50808 0.50729 0.50552 0.50296 0.49983 0.49619 0.49224 0.48804 0.48366 0.47925 0.47479 0.47035 0.46593 0.46157 0.45728 0.45298 0.44881 0.4446 0.4405 0.4364 0.43235 0.42832 0.42431 0.4204 0.41648 0.41271 0.40898 0.4054 0.40198 0.39877 0.39575 0.39295 0.39049 0.38826 0.38639 0.38487 0.38373 0.38297 0.38257 0.38254 0.38294 0.38371 0.38488 0.38646 0.38841 0.39076 0.39345 0.39649 0.39973 0.40332 0.40705 0.41096 0.41497 0.4191 0.42329 0.42751 0.43179 0.43593 0.44011 0.44408 0.44799 0.45166 0.45518 0.45853 0.46168 0.46471 0.46754 0.4703 0.47288 0.47534 0.47766 0.47982 0.48185 0.48373 0.48551 0.48712 0.48862 0.48995 0.49117 0.49223 0.49323 0.49408 0.49476 0.4953 0.4957 0.49596 0.49602 0.49597 0.49573 0.49534 0.4948 0.49416 0.49331 0.49229 0.49111 0.48975 0.48817 0.48645 0.48459 0.48267 0.48071 0.47875 0.47678 0.47483 0.47284 0.47075 0.4686 0.46636 0.46405 0.46163 0.45927 0.45686 0.45446 0.45207 0.44973 0.44738 0.44505 0.44271 0.44035 0.43799 0.43556 0.43314 0.4307 0.42828 0.42586 0.42351 0.42116 0.41887 0.41661 0.41443 0.41232 0.41023 0.40819 0.40618 0.40424 0.40229 0.40043 0.39862 0.39692 0.3953 0.39378 0.39242 0.39121 0.39017 0.38937 0.38889 0.38867 0.38882 0.38939 0.39036 0.39181 0.39372 0.39619 0.39917 0.40266 0.40664 0.41119 0.41609 0.42148 0.42712 0.43309 0.43919 0.44541 0.4516 0.45775 0.46385 0.46998 0.47605 0.48213 0.48832 0.49448 0.50056 0.5062 0.51116 0.51501 0.51766 0.51908 0.51954 0.51941 0.51921 0.51926 0.51986 0.5211 0.52303 0.52539 0.52796 0.53043 0.53251 0.53392 0.53473 0.53501 0.5349 0.5346 0.5342 0.53367 0.53299 0.53224 0.53138 0.53046 0.52956 0.52874 0.52809 0.52759 0.52725 0.5269 0.52641 0.52571 0.52454 0.52313 0.52157 0.52007 0.51884 0.51792 0.51741 0.51717 0.5171 0.51707 0.51714 0.51708 0.51702 0.51688 0.51672 0.51644 0.51619 0.51599 0.51597 0.51607 0.51644 0.51699 0.51781 0.51901 0.5205 0.52234 0.52452 0.52712 0.52991 0.53299 0.53624 0.53958 0.54303 0.54656 0.5501 0.55363 0.55729 0.56084 0.56442 0.56799 0.57169 0.5754 0.57934 0.58329 0.58744 0.59165 0.59593 0.60021 0.60445 0.60854 0.61262 0.61659 0.62043 0.62415 0.62784 0.6315 0.63505 0.63848 0.64182 0.64502 0.64812 0.65112 0.65393 0.65656 0.65892 0.66106 0.66281 0.66437 0.66556 0.66655 0.66722 0.66753 0.66768 0.6675 0.667 0.66636
-0.020366 -0.020432 -0.020489 -0.020516 -0.02049 -0.020437 -0.02033 -0.020132 -0.019826 -0.019405 -0.018802 -0.018058 -0.017065 -0.01582 -0.014297 -0.01245 -0.010298 -0.0078501 -0.0050364 -0.0020099 0.0012697 0.0048027 0.0084884 0.012339 0.016224 0.020159 0.024156 0.028025 0.031811 0.035536 0.039104 0.042513 0.045729 0.048768 0.051734 0.05452 0.057207 0.059876 0.062483 0.065079 0.067647 0.070158 0.072647 0.074981 0.077187 0.079214 0.080988 0.082496 0.083765 0.084705 0.085385 0.085724 0.085799 0.085546 0.084996 0.084125 0.082979 0.08155 0.079865 0.078019 0.076056 0.073975 0.071907 0.069854 0.067848 0.065955 0.064135 0.062481 0.060954 0.059545 0.058303 0.057192 0.056208 0.055362 0.054598 0.053952 0.053382 0.052873 0.052426 0.052018 0.051635 0.051278 0.050935 0.050588 0.050235 0.049866 0.049484 0.049064 0.048613 0.048141 0.04764 0.047131 0.046628 0.046123 0.045652 0.045233 0.044854 0.044547 0.044305 0.044166 0.044117 0.044174 0.044334 0.044627 0.045043 0.04559 0.046298 0.047148 0.048163 0.049349 0.050705 0.052261 0.053981 0.055875 0.058017 0.060293 0.062769 0.065398 0.068166 0.071113 0.074132 0.077216 0.080445 0.083662 0.086934 0.090188 0.093397 0.096637 0.09975 0.10278 0.10576 0.10859 0.11137 0.11404 0.11663 0.11923 0.12174 0.12423 0.12677 0.12939 0.13226 0.1354 0.13887 0.14288 0.1472 0.15206 0.15738 0.16317 0.16961 0.17645 0.18385 0.19179 0.20016 0.20909 0.21824 0.22759 0.23731 0.24692 0.25658 0.26602 0.27517 0.28417 0.29263 0.30058 0.30807 0.31485 0.32115 0.32662 0.3315 0.33579 0.33946 0.34262 0.34526 0.3475 0.34941 0.35099 0.35231 0.35341 0.35431 0.35506 0.35564 0.35606 0.35635 0.35646 0.35642 0.35621 0.35586 0.35534 0.35469 0.35394 0.35309 0.35216 0.35115 0.35007 0.34893 0.34773 0.34647 0.34514 0.34373 0.34232 0.34085 0.33947 0.33796 0.33649 0.33502 0.33352 0.33207 0.33063 0.32923 0.32787 0.32656 0.32532 0.32415 0.32303 0.32195 0.32103 0.32019 0.31942 0.31871 0.31808 0.31748 0.31697 0.31646 0.31602 0.31561 0.31522 0.31486 0.31451 0.31416 0.31383 0.31349 0.31315 0.31278 0.31237 0.3119 0.31137 0.31076 0.31008 0.30929 0.30841 0.30742 0.30633 0.30512 0.30377 0.30232 0.30074 0.29906 0.29728 0.29535 0.29336 0.2913 0.28918 0.28703 0.28482 0.28263 0.28041 0.2782 0.27602 0.27381 0.27167 0.26953 0.26743 0.26538 0.26334 0.26136 0.2594 0.25748 0.25563 0.2538 0.25203 0.25033 0.24868 0.2471 0.24558 0.24416 0.24283 0.24161 0.24051 0.23954 0.23869 0.23799 0.2374 0.23694 0.23662 0.23647 0.23654 0.23689 0.23754 0.23858 0.23998 0.24179 0.24401 0.24659 0.24957 0.25275 0.25609 0.25937 0.26253 0.26548 0.26806 0.27033 0.27211 0.27351 0.27458 0.27532 0.27588 0.27632 0.27671 0.27708 0.27748 0.27792 0.27836 0.27875 0.2791 0.27941 0.27963 0.27982 0.28004 0.28035 0.28081 0.28143 0.28218 0.28307 0.28397 0.28487 0.28571 0.28641 0.28701 0.28749 0.2879 0.28822 0.28848 0.28869 0.28886 0.28901 0.28913 0.2892 0.28919 0.28902 0.28868 0.28811 0.28734 0.28637 0.28523 0.2839 0.28245 0.2809 0.27928 0.27763 0.27594 0.27429 0.27268 0.27114 0.26968 0.26831 0.26703 0.26582 0.26468 0.2636 0.2625 0.2614 0.26024 0.25903 0.25773 0.25637 0.25494 0.25341 0.25196 0.25034 0.24876 0.24721 0.24573 0.24439 0.24323 0.2423 0.24162 0.24126 0.24117 0.2414 0.24197 0.24289 0.24414 0.24573 0.24771 0.25009 0.25312 0.25672 0.26105 0.26607 0.27185 0.27842 0.28586 0.2945 0.30407 0.31482 0.32664 0.33941 0.35312 0.36738 0.38241 0.39751 0.41279 0.42772 0.44212 0.45596 0.46874 0.48082 0.49181 0.50188 0.5109 0.51889 0.52602 0.53192 0.53684 0.54058 0.54313 0.54444 0.54467 0.54386 0.54206 0.53949 0.5363 0.53262 0.52862 0.52437 0.51994 0.51548 0.51092 0.50641 0.50191 0.49749 0.49311 0.48875 0.48448 0.48017 0.47596 0.47174 0.46758 0.46344 0.45929 0.45527 0.45123 0.4473 0.44344 0.43973 0.4362 0.43285 0.42971 0.42681 0.42423 0.4219 0.41994 0.41832 0.41712 0.41631 0.41587 0.41582 0.41619 0.41699 0.41819 0.4198 0.42182 0.42421 0.42694 0.43004 0.43338 0.43704 0.44083 0.44485 0.44895 0.45313 0.45739 0.46164 0.46594 0.47013 0.47436 0.47837 0.48233 0.48609 0.4897 0.49314 0.49637 0.4995 0.50242 0.50526 0.50788 0.5104 0.5128 0.51506 0.51717 0.51916 0.521 0.52268 0.52426 0.52566 0.52697 0.52813 0.52913 0.53002 0.53076 0.53138 0.53183 0.53211 0.5322 0.53216 0.53195 0.53158 0.53104 0.53033 0.52948 0.52848 0.52724 0.52582 0.52425 0.52248 0.52056 0.51857 0.51656 0.51453 0.51244 0.51043 0.50837 0.50623 0.50406 0.50175 0.49942 0.497 0.49461 0.49216 0.48971 0.48727 0.48483 0.48239 0.47999 0.47755 0.47508 0.4726 0.4701 0.46759 0.46505 0.46259 0.4601 0.45769 0.45529 0.45295 0.45068 0.44846 0.44631 0.44417 0.4421 0.44005 0.43807 0.43607 0.43411 0.43223 0.43043 0.42868 0.42708 0.42556 0.42425 0.42311 0.42217 0.42153 0.4212 0.42124 0.4217 0.42261 0.42396 0.4258 0.42821 0.43109 0.4346 0.43858 0.44315 0.44813 0.45361 0.45932 0.46545 0.47167 0.47803 0.48432 0.49065 0.49689 0.50309 0.50927 0.51549 0.52177 0.52813 0.53443 0.54026 0.54536 0.54931 0.552 0.55334 0.55367 0.55334 0.55291 0.55273 0.55311 0.55414 0.55587 0.55811 0.56067 0.56311 0.56524 0.56681 0.56788 0.56839 0.56853 0.56842 0.56813 0.56769 0.56711 0.56635 0.56546 0.56451 0.56355 0.56262 0.5618 0.56113 0.56064 0.56014 0.55954 0.55863 0.5575 0.55612 0.55469 0.55331 0.55225 0.55148 0.55107 0.55091 0.55088 0.55094 0.55102 0.55105 0.55103 0.55093 0.55078 0.55051 0.55026 0.5501 0.55008 0.55023 0.55063 0.55129 0.5522 0.55352 0.55514 0.55717 0.55953 0.56222 0.56525 0.56846 0.57191 0.57542 0.57899 0.58268 0.5864 0.59009 0.59381 0.59746 0.60115 0.60488 0.60862 0.61245 0.61644 0.62047 0.62466 0.62894 0.6334 0.63767 0.6421 0.64625 0.65042 0.65436 0.65819 0.66195 0.66566 0.66926 0.67279 0.67624 0.67958 0.68276 0.68585 0.68892 0.69172 0.6943 0.69668 0.69885 0.70063 0.70226 0.70353 0.70463 0.70526 0.70572 0.70577 0.70561 0.70523 0.70464
-0.014575 -0.014624 -0.014678 -0.014696 -0.014652 -0.014566 -0.014454 -0.014228 -0.013901 -0.01345 -0.012812 -0.012029 -0.010995 -0.0097002 -0.0080983 -0.0061922 -0.0039671 -0.0014325 0.0014677 0.0045859 0.0079658 0.011609 0.015416 0.01939 0.023396 0.027463 0.0316 0.035613 0.039538 0.043408 0.047118 0.050655 0.053987 0.057145 0.060213 0.063096 0.065869 0.068623 0.071318 0.074013 0.076684 0.079286 0.081866 0.084291 0.08658 0.088677 0.090517 0.092076 0.093387 0.094352 0.09505 0.095408 0.095485 0.095211 0.094637 0.093719 0.092496 0.090978 0.08918 0.08721 0.085114 0.082892 0.080685 0.0785 0.076368 0.074358 0.072431 0.070678 0.069067 0.067583 0.06627 0.065095 0.064049 0.06315 0.062339 0.06165 0.061043 0.060497 0.060023 0.05959 0.05919 0.058817 0.058454 0.058096 0.057738 0.057363 0.056974 0.056547 0.056092 0.055613 0.0551 0.054587 0.054066 0.053553 0.053075 0.052646 0.052264 0.051957 0.051721 0.051593 0.051553 0.051631 0.051809 0.052128 0.052565 0.053145 0.053884 0.054781 0.055833 0.057071 0.058484 0.0601 0.061885 0.063856 0.066079 0.068446 0.071004 0.073738 0.076617 0.079673 0.082808 0.086012 0.089376 0.092719 0.096131 0.099526 0.10287 0.10627 0.10952 0.1127 0.11582 0.11881 0.12174 0.12455 0.12729 0.13004 0.1327 0.13536 0.13806 0.14089 0.14397 0.14734 0.15104 0.15534 0.16005 0.16532 0.17104 0.17726 0.18415 0.19146 0.19938 0.20788 0.21682 0.22635 0.23609 0.24604 0.25637 0.26655 0.27676 0.28675 0.2964 0.30589 0.31478 0.32315 0.33103 0.33814 0.34477 0.35053 0.35568 0.36021 0.3641 0.36746 0.37028 0.37266 0.37471 0.37641 0.37782 0.37901 0.37999 0.3808 0.38144 0.38192 0.38222 0.38237 0.38234 0.38214 0.38178 0.38124 0.38058 0.37979 0.3789 0.37795 0.37688 0.37576 0.37455 0.37328 0.37192 0.37054 0.36913 0.36767 0.36613 0.36466 0.36307 0.36151 0.35994 0.35837 0.35683 0.3553 0.35381 0.3524 0.35099 0.34967 0.34841 0.34722 0.34607 0.34505 0.34413 0.34329 0.34252 0.34186 0.34123 0.34066 0.34013 0.33964 0.33917 0.33873 0.33832 0.33794 0.33755 0.33718 0.33681 0.33643 0.33603 0.33559 0.33509 0.33452 0.33386 0.33314 0.33228 0.33134 0.33027 0.32911 0.32782 0.32638 0.32484 0.32317 0.32138 0.31951 0.31747 0.31536 0.31319 0.31096 0.30869 0.30635 0.30402 0.30168 0.29935 0.29704 0.29472 0.29244 0.29018 0.28796 0.2858 0.28363 0.28153 0.27946 0.27742 0.27547 0.27353 0.27166 0.26985 0.26811 0.26644 0.26485 0.26335 0.26195 0.26067 0.25953 0.25852 0.25766 0.25694 0.25634 0.25589 0.25559 0.25547 0.25559 0.25601 0.25675 0.25792 0.25946 0.26147 0.26389 0.26671 0.26996 0.27342 0.27705 0.2806 0.28403 0.28726 0.29009 0.29262 0.29462 0.29623 0.29747 0.29834 0.29903 0.29955 0.30003 0.30048 0.30095 0.30143 0.3019 0.30234 0.3027 0.30298 0.30317 0.30332 0.30347 0.30372 0.30411 0.30472 0.30548 0.30639 0.30736 0.30831 0.3092 0.30997 0.31063 0.31119 0.31163 0.31198 0.31224 0.31245 0.31258 0.31268 0.31275 0.31279 0.31272 0.31251 0.31212 0.31151 0.31068 0.30965 0.30844 0.30706 0.30553 0.3039 0.30221 0.30047 0.2987 0.29695 0.29526 0.29362 0.29208 0.29064 0.28929 0.28803 0.28685 0.28569 0.28454 0.28337 0.28214 0.28085 0.27948 0.27804 0.27653 0.27492 0.2734 0.2717 0.27004 0.26841 0.26685 0.26547 0.26427 0.26331 0.26262 0.26226 0.26221 0.26246 0.26311 0.26413 0.26551 0.26727 0.26946 0.27207 0.27534 0.27926 0.28397 0.28942 0.29572 0.3029 0.31096 0.32031 0.33062 0.34221 0.35491 0.36858 0.38323 0.39846 0.41444 0.4305 0.44666 0.46241 0.47756 0.49212 0.50558 0.51822 0.52971 0.54021 0.5496 0.55792 0.56532 0.57144 0.57654 0.58042 0.58309 0.58451 0.58481 0.58406 0.58228 0.57968 0.57649 0.57277 0.56869 0.56437 0.55984 0.55526 0.55057 0.54593 0.54128 0.5367 0.53217 0.52768 0.52323 0.51877 0.5144 0.51002 0.50568 0.50136 0.49704 0.49283 0.48859 0.48449 0.48041 0.47651 0.47275 0.46918 0.46586 0.46272 0.45994 0.45743 0.45529 0.4535 0.45214 0.45116 0.45059 0.45041 0.45069 0.45138 0.45249 0.45404 0.45601 0.45841 0.46114 0.46425 0.46758 0.47128 0.47511 0.47917 0.48336 0.48761 0.49196 0.49629 0.5007 0.50501 0.50928 0.5134 0.5174 0.52119 0.52479 0.52824 0.53146 0.53458 0.53745 0.54023 0.54283 0.54534 0.54768 0.54988 0.55198 0.5539 0.55573 0.55742 0.55896 0.56034 0.56162 0.56276 0.5638 0.56468 0.56541 0.566 0.56644 0.56674 0.56686 0.56681 0.56662 0.56625 0.56572 0.56504 0.56417 0.56314 0.56189 0.56049 0.55885 0.55704 0.55512 0.55315 0.55111 0.54909 0.54705 0.54504 0.54302 0.54088 0.53872 0.53643 0.53408 0.53165 0.52922 0.52677 0.52433 0.52187 0.51943 0.51697 0.51453 0.51207 0.50958 0.50707 0.50451 0.50196 0.49936 0.49681 0.49425 0.49173 0.48923 0.48682 0.48448 0.48217 0.4799 0.47765 0.47548 0.47331 0.4712 0.46907 0.46706 0.46504 0.46318 0.46135 0.45964 0.45808 0.45668 0.45548 0.45452 0.45389 0.45354 0.4536 0.45411 0.45504 0.45647 0.45843 0.46095 0.464 0.46768 0.47189 0.47665 0.48188 0.48761 0.49366 0.50007 0.50658 0.51326 0.51985 0.52642 0.53289 0.53935 0.54582 0.55227 0.55883 0.56532 0.57183 0.57784 0.58312 0.5872 0.59013 0.5916 0.59207 0.59192 0.59164 0.59168 0.59223 0.59348 0.59541 0.59784 0.60049 0.60302 0.60517 0.60669 0.60757 0.60794 0.60786 0.60756 0.60721 0.60673 0.60612 0.60533 0.60441 0.60351 0.60259 0.60176 0.60108 0.60061 0.60023 0.5999 0.59938 0.59863 0.59748 0.59602 0.59445 0.59293 0.59172 0.59086 0.59041 0.59025 0.59024 0.59033 0.59037 0.5904 0.59042 0.59027 0.59017 0.58995 0.58969 0.58957 0.58959 0.58978 0.59017 0.59087 0.59187 0.59318 0.59486 0.59688 0.59928 0.60205 0.60508 0.6084 0.6118 0.61539 0.619 0.62269 0.6264 0.6301 0.63376 0.63744 0.64116 0.64485 0.64861 0.65245 0.65646 0.6605 0.66478 0.66914 0.67353 0.67785 0.68222 0.68646 0.69059 0.69457 0.69848 0.70224 0.70592 0.70955 0.71301 0.7165 0.71981 0.723 0.72604 0.72905 0.73184 0.73443 0.73682 0.73896 0.74072 0.74226 0.74365 0.74462 0.74526 0.74558 0.74563 0.74553 0.74515 0.74457
-0.014773 -0.01483 -0.014891 -0.01492 -0.014887 -0.014823 -0.014705 -0.014492 -0.014156 -0.013709 -0.013054 -0.012254 -0.011195 -0.0098676 -0.0082233 -0.0062507 -0.0039516 -0.001325 0.0016681 0.0048906 0.0083837 0.012143 0.016068 0.020165 0.024306 0.028504 0.032774 0.036906 0.040947 0.04493 0.048746 0.052388 0.055823 0.059084 0.062247 0.065221 0.068082 0.070911 0.073686 0.076455 0.079197 0.081869 0.084515 0.086998 0.089337 0.091484 0.093359 0.094949 0.096286 0.09728 0.098005 0.098374 0.098452 0.09818 0.097594 0.09666 0.095426 0.093891 0.092073 0.090074 0.087944 0.085687 0.08344 0.081216 0.079046 0.076996 0.075025 0.073225 0.071569 0.070044 0.068688 0.067477 0.066397 0.065467 0.064627 0.063913 0.063283 0.062715 0.062222 0.061772 0.061351 0.060963 0.060585 0.060205 0.059823 0.059426 0.059015 0.058564 0.058082 0.057574 0.057032 0.05648 0.055929 0.05538 0.054873 0.054412 0.053997 0.053665 0.053395 0.053245 0.05318 0.053235 0.053404 0.053708 0.054142 0.054719 0.055457 0.056358 0.057428 0.058684 0.060123 0.061768 0.063583 0.065589 0.067854 0.070275 0.072901 0.075704 0.078646 0.08178 0.084989 0.08828 0.091725 0.095163 0.098656 0.10214 0.10557 0.10902 0.11235 0.11559 0.11877 0.1218 0.12476 0.12758 0.13033 0.13307 0.13571 0.13834 0.14102 0.1438 0.14684 0.15011 0.15375 0.158 0.16262 0.16781 0.17343 0.17953 0.18627 0.19345 0.2012 0.20952 0.21829 0.2276 0.23716 0.24691 0.25704 0.26702 0.27703 0.28685 0.29632 0.30561 0.31435 0.32254 0.33026 0.33724 0.3437 0.34932 0.35434 0.35875 0.36251 0.36576 0.36849 0.37077 0.37273 0.37436 0.37571 0.37684 0.37776 0.37852 0.37911 0.37954 0.37982 0.37993 0.37989 0.37966 0.37929 0.37874 0.37808 0.3773 0.37642 0.37548 0.37444 0.37332 0.37215 0.37091 0.36956 0.3682 0.36679 0.36534 0.36384 0.36242 0.36087 0.35936 0.35785 0.35633 0.35483 0.35336 0.35193 0.35055 0.34919 0.34792 0.34671 0.34556 0.34444 0.34347 0.34258 0.34177 0.34104 0.3404 0.33981 0.33926 0.33874 0.33826 0.33783 0.33741 0.33702 0.33665 0.33628 0.33594 0.33558 0.33524 0.33485 0.3344 0.33393 0.33337 0.33274 0.33204 0.33121 0.3303 0.32927 0.32813 0.32688 0.32549 0.324 0.32237 0.32063 0.3188 0.31682 0.31479 0.31267 0.3105 0.3083 0.30602 0.30378 0.3015 0.29924 0.297 0.29474 0.29254 0.29034 0.28818 0.28609 0.28398 0.28195 0.27994 0.27797 0.27607 0.2742 0.27239 0.27064 0.26895 0.26735 0.2658 0.26436 0.26302 0.26181 0.26072 0.25977 0.25896 0.2583 0.25776 0.25735 0.2571 0.25701 0.25715 0.25758 0.25833 0.2595 0.26103 0.26301 0.26539 0.26815 0.27135 0.27473 0.27828 0.28177 0.28514 0.2883 0.29111 0.2936 0.29561 0.29724 0.29851 0.29941 0.30012 0.30068 0.30118 0.30167 0.30215 0.30263 0.30309 0.3035 0.30384 0.30408 0.3042 0.30427 0.30434 0.30451 0.30483 0.30536 0.30605 0.30689 0.30779 0.30869 0.30954 0.31029 0.31094 0.31145 0.31189 0.31222 0.31247 0.31265 0.31275 0.31282 0.31284 0.31283 0.31274 0.3125 0.31209 0.31148 0.31066 0.30966 0.30848 0.30713 0.30567 0.30408 0.30244 0.30075 0.29902 0.29734 0.29569 0.29411 0.29262 0.29119 0.28987 0.28863 0.28746 0.28633 0.2852 0.28405 0.28284 0.28156 0.28022 0.27882 0.27734 0.27576 0.27424 0.27258 0.27094 0.26934 0.26782 0.26643 0.26525 0.26428 0.26357 0.26318 0.26309 0.26331 0.26387 0.26482 0.26609 0.26772 0.26976 0.27222 0.27529 0.27899 0.28342 0.28859 0.29454 0.30134 0.30899 0.31789 0.32774 0.33878 0.35094 0.36405 0.37811 0.39275 0.40814 0.42365 0.4393 0.45459 0.46929 0.48344 0.49651 0.50883 0.52 0.53026 0.5394 0.54754 0.55475 0.56072 0.56564 0.56942 0.57194 0.57327 0.5735 0.57269 0.57089 0.56826 0.56508 0.56133 0.5573 0.553 0.54853 0.544 0.53938 0.53483 0.53025 0.52578 0.52133 0.51692 0.51261 0.50826 0.50402 0.49975 0.49554 0.49135 0.48718 0.4831 0.47898 0.47502 0.47111 0.46733 0.46373 0.46031 0.45714 0.45418 0.45156 0.44921 0.44723 0.4456 0.44439 0.44358 0.44313 0.4431 0.44354 0.44435 0.44561 0.44725 0.44934 0.45186 0.45467 0.45788 0.46133 0.46509 0.46897 0.4731 0.4773 0.48162 0.486 0.49038 0.4948 0.49914 0.50346 0.50756 0.51158 0.51538 0.51901 0.5225 0.52573 0.52885 0.53176 0.53455 0.53716 0.53969 0.54204 0.54427 0.54636 0.5483 0.55012 0.55178 0.55333 0.55471 0.55599 0.55711 0.55812 0.55899 0.55973 0.5603 0.56072 0.561 0.56109 0.56104 0.56082 0.56044 0.55991 0.55921 0.55832 0.55727 0.55602 0.55459 0.55296 0.55115 0.54924 0.54724 0.54523 0.54317 0.54116 0.53915 0.53712 0.535 0.53283 0.53052 0.52819 0.52574 0.52334 0.52089 0.51844 0.51599 0.5136 0.51117 0.50877 0.50633 0.50384 0.50138 0.49885 0.49631 0.49376 0.49123 0.48872 0.48626 0.48383 0.48141 0.47909 0.47678 0.47455 0.47236 0.4702 0.46804 0.46596 0.46391 0.46191 0.45995 0.4581 0.45637 0.45475 0.45324 0.45192 0.45078 0.44991 0.44934 0.44907 0.44919 0.44974 0.45071 0.45221 0.4542 0.45675 0.4598 0.46349 0.46761 0.47238 0.47751 0.48319 0.48914 0.49545 0.50184 0.50837 0.51484 0.52132 0.52768 0.53401 0.54036 0.54672 0.55317 0.55962 0.56597 0.5719 0.57709 0.58119 0.584 0.58556 0.58609 0.58603 0.58589 0.58599 0.58663 0.58794 0.58997 0.59242 0.59511 0.59762 0.59973 0.60118 0.60198 0.60224 0.60211 0.6018 0.60138 0.60087 0.60025 0.59949 0.59863 0.59768 0.59677 0.59599 0.59534 0.59492 0.5946 0.59426 0.59386 0.59312 0.59196 0.59048 0.58885 0.58733 0.58609 0.5852 0.58472 0.58448 0.58445 0.58452 0.58454 0.58457 0.58449 0.58441 0.58425 0.584 0.5838 0.58364 0.58357 0.58375 0.58413 0.58476 0.5857 0.58699 0.58859 0.59054 0.59287 0.5956 0.59865 0.60186 0.60528 0.60876 0.61236 0.61597 0.61967 0.62339 0.62713 0.63081 0.63446 0.63815 0.64201 0.64581 0.64985 0.65393 0.65822 0.66254 0.66699 0.67142 0.67575 0.68 0.6842 0.68824 0.69226 0.69603 0.69976 0.70344 0.70705 0.71055 0.71398 0.71721 0.72032 0.72347 0.72627 0.72884 0.73123 0.73338 0.73526 0.73688 0.73813 0.73913 0.73994 0.74023 0.74037 0.74022 0.73973 0.73917
-0.024443 -0.024485 -0.024542 -0.024579 -0.024556 -0.024521 -0.024434 -0.024293 -0.024022 -0.023669 -0.023153 -0.022519 -0.021685 -0.020633 -0.019334 -0.017776 -0.015972 -0.0139 -0.011525 -0.0089695 -0.0061998 -0.0032074 -7.96e-005 0.0031908 0.0064922 0.0098521 0.013276 0.016583 0.019824 0.023031 0.026115 0.029053 0.031827 0.03447 0.03705 0.039487 0.04183 0.044155 0.046433 0.048708 0.050961 0.053152 0.055331 0.05738 0.059317 0.061103 0.062673 0.064013 0.065142 0.065985 0.0666 0.066922 0.067011 0.06681 0.066357 0.065618 0.064643 0.063416 0.061972 0.060394 0.058712 0.056929 0.055156 0.053393 0.051666 0.050038 0.048469 0.047042 0.045725 0.044514 0.043452 0.04249 0.041645 0.040922 0.040271 0.039722 0.039234 0.038801 0.038423 0.038077 0.037747 0.037439 0.037146 0.03685 0.036546 0.036224 0.035888 0.035515 0.035124 0.034712 0.034276 0.033827 0.033382 0.03295 0.032538 0.032169 0.031836 0.031566 0.031353 0.031225 0.031179 0.031217 0.031354 0.031598 0.031946 0.032407 0.033008 0.033738 0.034602 0.035616 0.036779 0.038119 0.039599 0.041236 0.043091 0.045065 0.047207 0.049493 0.051908 0.054474 0.057103 0.059791 0.062619 0.065435 0.068289 0.07114 0.073945 0.076782 0.079506 0.082154 0.084764 0.087249 0.089687 0.092019 0.09428 0.096546 0.098728 0.10089 0.10306 0.10534 0.10782 0.11054 0.11356 0.11706 0.12088 0.12519 0.1299 0.13503 0.14072 0.14677 0.15338 0.16052 0.16806 0.17614 0.18444 0.19297 0.20185 0.21068 0.21958 0.22832 0.2368 0.24518 0.25306 0.26051 0.26752 0.27387 0.27979 0.28494 0.28954 0.29359 0.29707 0.30007 0.3026 0.30474 0.30655 0.30806 0.30932 0.31038 0.31123 0.31195 0.31249 0.3129 0.31317 0.31329 0.31326 0.31306 0.31272 0.31224 0.31165 0.31095 0.31017 0.30931 0.30835 0.30734 0.30626 0.30515 0.30398 0.30274 0.30148 0.30017 0.29881 0.29753 0.29611 0.29472 0.29331 0.2919 0.29054 0.2892 0.28791 0.28665 0.28543 0.28428 0.28319 0.28216 0.28116 0.28028 0.2795 0.2788 0.27816 0.27758 0.27705 0.27659 0.27616 0.27578 0.2754 0.27506 0.27475 0.27445 0.27416 0.27387 0.27358 0.27328 0.27294 0.27257 0.27215 0.27167 0.27111 0.27048 0.26974 0.26892 0.26799 0.26697 0.26586 0.26459 0.26324 0.26176 0.26017 0.25851 0.25671 0.25486 0.25292 0.25094 0.24894 0.24686 0.24481 0.24273 0.24067 0.23863 0.23656 0.23456 0.23256 0.2306 0.22869 0.22678 0.22493 0.22311 0.22132 0.2196 0.21789 0.21624 0.21465 0.21311 0.21163 0.21021 0.20887 0.20762 0.20646 0.20542 0.20448 0.20367 0.20296 0.20237 0.20189 0.20154 0.20134 0.20136 0.2016 0.20213 0.20302 0.20422 0.20582 0.20777 0.21005 0.21271 0.21555 0.21856 0.22152 0.22436 0.227 0.22931 0.23132 0.23287 0.23408 0.23497 0.23557 0.236 0.23633 0.23661 0.23689 0.23719 0.23753 0.23789 0.23823 0.23857 0.23887 0.23914 0.23939 0.23968 0.24006 0.24055 0.24121 0.24197 0.24284 0.24371 0.24455 0.24532 0.24598 0.24652 0.24696 0.24732 0.24764 0.2479 0.24815 0.24834 0.24851 0.24868 0.2488 0.24883 0.24873 0.24844 0.24793 0.24723 0.24634 0.24528 0.24406 0.2427 0.24126 0.23975 0.23822 0.23664 0.23512 0.23361 0.23218 0.23084 0.22955 0.22837 0.22725 0.2262 0.22518 0.22416 0.22314 0.22207 0.22095 0.21975 0.21849 0.21717 0.21576 0.21442 0.21292 0.21144 0.20999 0.20862 0.20739 0.20632 0.20545 0.20482 0.20446 0.20435 0.20452 0.20501 0.20582 0.20692 0.20835 0.2101 0.21221 0.21491 0.21815 0.22205 0.22661 0.23185 0.23787 0.24464 0.25251 0.26126 0.27109 0.28196 0.29376 0.30649 0.31977 0.33383 0.348 0.3624 0.37654 0.39019 0.4034 0.41564 0.4272 0.43778 0.44745 0.45618 0.46394 0.47085 0.47661 0.48141 0.48505 0.48752 0.48884 0.48905 0.48826 0.48649 0.48396 0.48082 0.4772 0.47326 0.46912 0.46478 0.46041 0.45597 0.45159 0.44721 0.4429 0.43865 0.43439 0.43022 0.42607 0.42197 0.41787 0.41384 0.40987 0.40587 0.40199 0.39812 0.39437 0.39069 0.38717 0.3838 0.38062 0.37767 0.37493 0.3725 0.37034 0.36853 0.36705 0.36598 0.36526 0.36492 0.36495 0.3654 0.36625 0.36748 0.36912 0.37113 0.37352 0.37622 0.37925 0.38252 0.38609 0.38978 0.39367 0.39765 0.40171 0.40584 0.40998 0.41415 0.41822 0.42235 0.42631 0.43021 0.43391 0.43749 0.44093 0.44415 0.4473 0.45022 0.45308 0.45573 0.4583 0.46073 0.46302 0.46519 0.46722 0.46911 0.47087 0.47248 0.4739 0.47523 0.47641 0.47744 0.47834 0.47908 0.47966 0.48008 0.48038 0.48048 0.48041 0.48019 0.47978 0.47923 0.47852 0.47762 0.47659 0.47538 0.47399 0.47238 0.47064 0.46873 0.46673 0.4647 0.46265 0.46057 0.45848 0.45637 0.45421 0.45199 0.44965 0.44731 0.44484 0.44242 0.43994 0.43747 0.43502 0.43259 0.43014 0.42772 0.42531 0.42284 0.42042 0.41794 0.41546 0.41297 0.41054 0.40809 0.4057 0.40337 0.40106 0.39882 0.39663 0.3945 0.3924 0.39038 0.38834 0.3864 0.38444 0.38254 0.38072 0.379 0.37733 0.37578 0.37433 0.37309 0.37196 0.37107 0.37044 0.37006 0.37006 0.37044 0.3712 0.37242 0.37406 0.37625 0.37891 0.38214 0.38584 0.3901 0.39479 0.39993 0.40538 0.41123 0.41722 0.42337 0.42949 0.4356 0.44166 0.44767 0.4537 0.45977 0.46599 0.47225 0.47846 0.48422 0.48928 0.49318 0.4958 0.49702 0.49717 0.49669 0.49604 0.49559 0.49568 0.49645 0.49789 0.49987 0.50221 0.50452 0.50662 0.50834 0.50954 0.51024 0.51058 0.51065 0.51046 0.51004 0.50949 0.5087 0.50774 0.50671 0.50559 0.50453 0.50357 0.50272 0.50198 0.50127 0.50048 0.4995 0.49838 0.49707 0.49576 0.49453 0.49359 0.4929 0.49253 0.49239 0.4924 0.4924 0.49249 0.49252 0.49246 0.49234 0.49218 0.49191 0.49165 0.49147 0.49146 0.49162 0.492 0.49267 0.49359 0.49489 0.49656 0.49855 0.50091 0.50361 0.50662 0.50986 0.51327 0.51678 0.52039 0.52408 0.52781 0.53151 0.53528 0.53895 0.54272 0.5464 0.55024 0.55411 0.55806 0.56217 0.56644 0.57076 0.57518 0.57949 0.58383 0.58804 0.59212 0.59601 0.59984 0.60351 0.60716 0.61075 0.61424 0.61771 0.62108 0.62434 0.62748 0.63053 0.63331 0.6359 0.63826 0.6404 0.64221 0.64374 0.64504 0.64601 0.64684 0.64719 0.64725 0.64711 0.64679 0.64616
-0.024531 -0.02457 -0.024614 -0.024635 -0.024613 -0.024565 -0.024476 -0.024319 -0.024046 -0.023684 -0.023172 -0.022546 -0.021715 -0.020663 -0.019377 -0.017846 -0.01606 -0.014015 -0.011673 -0.0091528 -0.0064198 -0.0034726 -0.0003932 0.0028231 0.0060755 0.009384 0.012759 0.016026 0.019226 0.022383 0.025415 0.028315 0.031043 0.033627 0.036161 0.03854 0.040823 0.043102 0.045325 0.047547 0.049746 0.051889 0.054023 0.056033 0.057933 0.059687 0.061225 0.062537 0.063647 0.06448 0.065089 0.065412 0.065513 0.065327 0.064887 0.064162 0.06319 0.061986 0.060559 0.058992 0.057318 0.055551 0.053781 0.052028 0.05032 0.048704 0.047152 0.045738 0.044438 0.043238 0.042182 0.041235 0.040395 0.039675 0.039023 0.03847 0.037984 0.037555 0.037176 0.036831 0.036502 0.036197 0.035906 0.035611 0.03531 0.034994 0.034664 0.034308 0.033926 0.033522 0.0331 0.032666 0.032239 0.031812 0.031414 0.031057 0.030735 0.030478 0.030283 0.030167 0.030129 0.030174 0.03031 0.030563 0.030918 0.031387 0.031984 0.032709 0.033569 0.034573 0.035721 0.037048 0.03851 0.040129 0.041957 0.043906 0.046017 0.048267 0.050642 0.053171 0.055763 0.058415 0.061198 0.063976 0.066789 0.069597 0.072362 0.075163 0.077855 0.080478 0.083059 0.085518 0.087938 0.090255 0.092505 0.094751 0.096914 0.099062 0.10123 0.10349 0.10597 0.10868 0.1117 0.1152 0.11902 0.12332 0.128 0.13311 0.13878 0.14478 0.15134 0.15843 0.16593 0.17396 0.1822 0.19067 0.19948 0.20823 0.21704 0.22568 0.23408 0.24235 0.25015 0.25748 0.2644 0.27067 0.2765 0.28158 0.28613 0.29014 0.29357 0.29653 0.29903 0.30114 0.30295 0.30445 0.30569 0.30674 0.30759 0.3083 0.30884 0.30925 0.30952 0.30963 0.30959 0.30939 0.30905 0.30856 0.30796 0.30724 0.30644 0.30559 0.30463 0.30362 0.30255 0.30146 0.30028 0.29905 0.29778 0.29647 0.2951 0.29381 0.29239 0.29096 0.28957 0.28815 0.28677 0.28543 0.28413 0.28285 0.28161 0.28044 0.27934 0.27828 0.27728 0.27639 0.27558 0.27487 0.2742 0.27361 0.27307 0.2726 0.27215 0.27176 0.27137 0.27102 0.27071 0.27039 0.27009 0.2698 0.26948 0.26917 0.26883 0.26846 0.26803 0.26754 0.26698 0.26636 0.26563 0.26482 0.26391 0.26289 0.2618 0.26055 0.25922 0.25777 0.25622 0.25459 0.25282 0.251 0.24911 0.24717 0.2452 0.24317 0.24116 0.23913 0.23711 0.23512 0.2331 0.23113 0.22918 0.22727 0.2254 0.22353 0.22173 0.21995 0.21821 0.21652 0.21486 0.21326 0.21171 0.21021 0.20877 0.2074 0.20611 0.20491 0.20382 0.20284 0.20196 0.20121 0.20057 0.20004 0.19963 0.19934 0.19919 0.19924 0.19953 0.20009 0.201 0.20221 0.20382 0.20576 0.20804 0.21068 0.2135 0.21648 0.21942 0.22225 0.22489 0.22721 0.22925 0.23086 0.23213 0.23309 0.23375 0.23426 0.23465 0.235 0.23534 0.23569 0.23606 0.23643 0.23676 0.23705 0.2373 0.2375 0.23767 0.23787 0.23815 0.23857 0.23914 0.23985 0.24065 0.24149 0.2423 0.24306 0.2437 0.24425 0.2447 0.24508 0.24538 0.24563 0.24584 0.24601 0.24616 0.24627 0.24636 0.24635 0.24621 0.2459 0.24539 0.24469 0.24381 0.24277 0.24157 0.24025 0.23884 0.23737 0.23587 0.23434 0.23284 0.23136 0.22995 0.22862 0.22737 0.22619 0.22508 0.22405 0.22304 0.22204 0.22103 0.21996 0.21884 0.21765 0.21642 0.21511 0.21373 0.21241 0.21095 0.2095 0.20809 0.20675 0.20555 0.20451 0.20366 0.20306 0.20272 0.20263 0.20283 0.20334 0.20414 0.20525 0.20666 0.20841 0.21053 0.21323 0.21645 0.22035 0.22488 0.23013 0.23612 0.24285 0.2507 0.25941 0.26921 0.28002 0.29175 0.30441 0.31766 0.33161 0.34571 0.36004 0.37406 0.38762 0.40071 0.41286 0.42432 0.43479 0.44436 0.45298 0.46064 0.46745 0.47312 0.47786 0.48145 0.4839 0.48519 0.48539 0.4846 0.48286 0.48037 0.47731 0.47375 0.46986 0.46576 0.46149 0.4572 0.4528 0.44848 0.44415 0.43988 0.43567 0.43148 0.42735 0.42321 0.41917 0.41512 0.41113 0.40719 0.40325 0.39941 0.39556 0.39187 0.38823 0.38474 0.38139 0.37825 0.37533 0.37258 0.37015 0.36799 0.36618 0.36469 0.36358 0.36284 0.36245 0.36244 0.36284 0.36362 0.36479 0.36634 0.36829 0.37059 0.37318 0.37613 0.37932 0.3828 0.38638 0.39017 0.39406 0.39803 0.40208 0.40612 0.4102 0.4142 0.4182 0.42207 0.42586 0.42951 0.43299 0.43631 0.43946 0.44252 0.44537 0.44812 0.45071 0.45319 0.45553 0.45774 0.45984 0.46178 0.46359 0.46528 0.46683 0.46823 0.46951 0.47064 0.47166 0.47251 0.47322 0.47379 0.4742 0.47446 0.47457 0.47451 0.4743 0.47395 0.4734 0.4727 0.47184 0.47084 0.46961 0.46826 0.4667 0.46501 0.46313 0.46121 0.45921 0.4572 0.45517 0.45316 0.45109 0.44896 0.44679 0.44452 0.44221 0.43981 0.43747 0.43506 0.43266 0.43024 0.42786 0.42548 0.42313 0.42079 0.41838 0.41601 0.41361 0.41121 0.40878 0.40642 0.40404 0.40172 0.39943 0.39718 0.395 0.39286 0.39081 0.38876 0.38677 0.38481 0.38289 0.38101 0.37919 0.37742 0.37573 0.37413 0.37264 0.37126 0.37006 0.36899 0.36814 0.3676 0.3673 0.36735 0.36779 0.36862 0.36991 0.37164 0.37386 0.37655 0.37981 0.3835 0.38776 0.3924 0.39749 0.40287 0.4086 0.41446 0.42046 0.4264 0.43234 0.43822 0.44406 0.4499 0.45579 0.46181 0.46784 0.47385 0.47943 0.48435 0.48807 0.49059 0.49178 0.49199 0.49154 0.491 0.49063 0.49081 0.49161 0.49306 0.49503 0.49733 0.49965 0.50174 0.50337 0.50452 0.50524 0.50554 0.50559 0.50548 0.50514 0.50457 0.50388 0.503 0.502 0.50095 0.49996 0.49906 0.49833 0.49765 0.49695 0.49623 0.49532 0.49421 0.49296 0.49165 0.49044 0.4895 0.48882 0.48842 0.48828 0.48824 0.4883 0.48836 0.48836 0.48829 0.48818 0.48801 0.48776 0.4875 0.48734 0.48732 0.48748 0.48786 0.4885 0.48941 0.49062 0.49225 0.49415 0.49639 0.49903 0.50195 0.50503 0.50834 0.51177 0.51529 0.51885 0.52248 0.52606 0.52972 0.53335 0.537 0.54063 0.54437 0.54811 0.55206 0.55606 0.5602 0.56442 0.56877 0.57301 0.5773 0.58138 0.58549 0.58929 0.593 0.59665 0.60031 0.60382 0.60728 0.61073 0.61406 0.6173 0.62043 0.62343 0.6262 0.62882 0.63118 0.63325 0.63506 0.63662 0.63785 0.63887 0.6396 0.63996 0.64004 0.63993 0.63961 0.63909
-0.021072 -0.021136 -0.021198 -0.021235 -0.021221 -0.021184 -0.021106 -0.020947 -0.020691 -0.020326 -0.01982 -0.019179 -0.018339 -0.017285 -0.015981 -0.014407 -0.012585 -0.010496 -0.0081077 -0.0055291 -0.0027377 0.0002655 0.003403 0.0066834 0.009999 0.013361 0.016795 0.020119 0.023375 0.026594 0.029687 0.032649 0.035456 0.038115 0.04072 0.043186 0.045557 0.047907 0.050212 0.052513 0.054786 0.056998 0.059192 0.06126 0.063208 0.065 0.066562 0.067901 0.069036 0.069874 0.070489 0.070805 0.070894 0.070683 0.070216 0.069472 0.06848 0.067246 0.065784 0.064175 0.062473 0.060666 0.058861 0.057078 0.055324 0.053679 0.052089 0.05065 0.04932 0.048093 0.047013 0.046043 0.045182 0.044448 0.043786 0.043229 0.042732 0.042295 0.041913 0.041564 0.041235 0.040929 0.040632 0.040332 0.040025 0.039701 0.039367 0.038996 0.038602 0.038181 0.037743 0.037289 0.036832 0.036383 0.035961 0.035578 0.03523 0.03495 0.034725 0.034585 0.034529 0.034559 0.034678 0.03491 0.035243 0.0357 0.036294 0.037006 0.037862 0.038867 0.040019 0.041349 0.042819 0.044449 0.046289 0.048253 0.050389 0.052672 0.055077 0.057641 0.060279 0.062974 0.065807 0.068623 0.071496 0.074361 0.077178 0.08004 0.082772 0.085437 0.088056 0.090553 0.092991 0.095327 0.097596 0.099848 0.10202 0.10416 0.10633 0.10857 0.11102 0.11369 0.11665 0.12008 0.12381 0.12804 0.13262 0.13764 0.14316 0.14907 0.15554 0.16253 0.16992 0.17786 0.18602 0.19441 0.20319 0.21192 0.22073 0.22938 0.2378 0.24611 0.25395 0.26134 0.26833 0.27466 0.28054 0.28567 0.29027 0.2943 0.29777 0.30076 0.30328 0.30542 0.30725 0.30875 0.31001 0.31107 0.31191 0.31263 0.31318 0.3136 0.31387 0.31399 0.31396 0.31377 0.31346 0.31299 0.31241 0.31171 0.31095 0.31013 0.30919 0.30822 0.30719 0.3061 0.30497 0.30376 0.30254 0.30127 0.29995 0.29869 0.2973 0.29592 0.29455 0.29318 0.29184 0.29051 0.28924 0.28802 0.28681 0.28567 0.28459 0.28357 0.28258 0.28171 0.28094 0.28025 0.27961 0.27905 0.27853 0.27808 0.27767 0.27729 0.27692 0.27659 0.27628 0.276 0.27572 0.27544 0.27515 0.27486 0.27454 0.27418 0.27379 0.27332 0.27278 0.27217 0.27146 0.27065 0.26975 0.26875 0.26766 0.26643 0.26511 0.26366 0.26212 0.26049 0.25872 0.2569 0.25501 0.25308 0.25111 0.24908 0.24706 0.24503 0.243 0.24102 0.239 0.23703 0.23508 0.23316 0.2313 0.22942 0.22761 0.22583 0.22408 0.22239 0.22073 0.21912 0.21756 0.21605 0.2146 0.21321 0.21191 0.21069 0.20957 0.20857 0.20766 0.20688 0.20621 0.20565 0.20522 0.20492 0.20476 0.20481 0.20511 0.20568 0.2066 0.20784 0.20946 0.21144 0.21374 0.21643 0.21928 0.2223 0.22526 0.22812 0.23078 0.2331 0.23514 0.23675 0.23801 0.23897 0.23963 0.24013 0.24049 0.24083 0.24115 0.24148 0.24185 0.24222 0.24257 0.24289 0.24316 0.24336 0.24354 0.24375 0.24404 0.24444 0.245 0.2457 0.2465 0.24732 0.24812 0.24887 0.2495 0.25003 0.25047 0.25081 0.25109 0.25132 0.25151 0.25165 0.25177 0.25187 0.25193 0.25191 0.25176 0.25143 0.25091 0.2502 0.24931 0.24826 0.24705 0.24573 0.24431 0.24284 0.24133 0.23979 0.23828 0.23681 0.23539 0.23405 0.23278 0.23161 0.23049 0.22944 0.22844 0.22743 0.22641 0.22534 0.22423 0.22304 0.22181 0.2205 0.2191 0.21778 0.21631 0.21484 0.21341 0.21204 0.21082 0.20975 0.20888 0.20823 0.20787 0.20776 0.2079 0.20836 0.20912 0.21016 0.21152 0.21319 0.21523 0.21781 0.22093 0.22469 0.22907 0.23413 0.23995 0.24649 0.25412 0.26261 0.27216 0.28277 0.2943 0.30672 0.31976 0.33357 0.34755 0.36174 0.37569 0.38918 0.40224 0.41438 0.42582 0.4363 0.4459 0.45452 0.46219 0.46903 0.47475 0.4795 0.48311 0.48556 0.48686 0.48708 0.48634 0.48462 0.48212 0.47907 0.47554 0.47166 0.46758 0.46332 0.45902 0.45465 0.45034 0.44605 0.44181 0.43764 0.43348 0.42941 0.42534 0.42134 0.41734 0.4134 0.40951 0.40561 0.40182 0.39803 0.39436 0.39079 0.38735 0.38404 0.38094 0.37808 0.37541 0.37304 0.37097 0.36923 0.36782 0.36683 0.3662 0.36593 0.36605 0.36658 0.36749 0.36882 0.37055 0.37264 0.37511 0.37789 0.38104 0.3844 0.38805 0.39182 0.3958 0.39985 0.40398 0.4082 0.41239 0.41664 0.42079 0.42496 0.42894 0.43286 0.43661 0.44018 0.4436 0.44683 0.44991 0.45281 0.45564 0.45828 0.46079 0.4632 0.46545 0.46758 0.46955 0.47139 0.4731 0.4747 0.47612 0.47742 0.47859 0.47963 0.48049 0.48124 0.48181 0.48225 0.48251 0.48262 0.48258 0.48234 0.48196 0.48142 0.48071 0.47983 0.4788 0.4776 0.47622 0.47463 0.47291 0.47103 0.46909 0.4671 0.46509 0.46305 0.46102 0.45895 0.45681 0.45463 0.45237 0.45004 0.44765 0.44528 0.44284 0.44044 0.43803 0.43565 0.43327 0.43086 0.4285 0.42612 0.42374 0.42129 0.41887 0.41643 0.414 0.4116 0.40923 0.40692 0.40466 0.40244 0.40027 0.39816 0.39609 0.39408 0.39206 0.39012 0.3882 0.38634 0.38453 0.38281 0.38116 0.37962 0.37819 0.37694 0.37583 0.37497 0.37436 0.37401 0.37404 0.37443 0.3752 0.37646 0.37817 0.3804 0.38311 0.38639 0.39013 0.39445 0.39916 0.40438 0.40989 0.41577 0.42177 0.42792 0.43406 0.44019 0.44622 0.45221 0.45819 0.46423 0.47036 0.47648 0.48257 0.48819 0.49318 0.49702 0.4996 0.50094 0.50121 0.50088 0.50039 0.50013 0.50038 0.50123 0.5028 0.50484 0.50721 0.50954 0.51163 0.51322 0.51427 0.51483 0.51501 0.51502 0.51484 0.51441 0.51382 0.51308 0.51215 0.51116 0.51016 0.50916 0.50829 0.50757 0.50694 0.50631 0.50561 0.50472 0.50357 0.50223 0.50082 0.49953 0.49851 0.49772 0.49725 0.49705 0.49698 0.49697 0.497 0.49696 0.49685 0.4967 0.49653 0.49626 0.49598 0.49579 0.49574 0.49589 0.49626 0.49691 0.49776 0.49902 0.5006 0.5025 0.50481 0.50745 0.5104 0.51353 0.51685 0.52031 0.52382 0.5274 0.53114 0.53478 0.53851 0.54221 0.54591 0.54958 0.55342 0.55725 0.5612 0.56525 0.56951 0.57377 0.57814 0.58244 0.58679 0.59091 0.59494 0.59884 0.60269 0.60642 0.61012 0.6137 0.61726 0.62073 0.62411 0.62737 0.63057 0.63363 0.63643 0.6391 0.64141 0.64355 0.64536 0.64694 0.64818 0.64914 0.64978 0.65022 0.65028 0.65014 0.64979 0.64919
-0.022626 -0.022671 -0.022725 -0.022761 -0.022749 -0.022703 -0.022621 -0.022474 -0.022213 -0.021843 -0.021327 -0.020689 -0.019846 -0.018784 -0.01746 -0.015893 -0.014065 -0.011981 -0.0095967 -0.0070176 -0.004224 -0.0012196 0.0019224 0.0052051 0.0085306 0.01191 0.015361 0.018706 0.021984 0.025232 0.028354 0.031339 0.034159 0.036832 0.039444 0.041906 0.044285 0.046634 0.048944 0.051247 0.053529 0.055756 0.057956 0.060034 0.061997 0.063805 0.065387 0.066736 0.067874 0.068725 0.069352 0.069677 0.069775 0.069571 0.069113 0.068367 0.067369 0.066123 0.064646 0.063023 0.061296 0.059462 0.057636 0.055817 0.054046 0.052372 0.050759 0.049295 0.047943 0.046698 0.045601 0.044614 0.043737 0.042988 0.042313 0.041745 0.041239 0.040789 0.040391 0.040031 0.039691 0.039373 0.039069 0.038762 0.038448 0.038118 0.037779 0.037406 0.037006 0.036586 0.036142 0.035684 0.035227 0.034773 0.034348 0.033967 0.033625 0.033341 0.033113 0.03298 0.032917 0.032955 0.033077 0.033316 0.033654 0.034113 0.034713 0.035431 0.036293 0.037309 0.038469 0.039812 0.041296 0.042934 0.044788 0.046772 0.048925 0.051226 0.053658 0.05624 0.058897 0.061617 0.064478 0.067333 0.07023 0.073124 0.075978 0.078863 0.081641 0.08434 0.086996 0.089527 0.092009 0.09438 0.096688 0.098985 0.10119 0.10338 0.10559 0.10789 0.11038 0.11312 0.11615 0.11964 0.12347 0.12777 0.13245 0.13756 0.14319 0.14924 0.15585 0.16297 0.17053 0.17859 0.18693 0.19549 0.20442 0.2133 0.22225 0.23107 0.23963 0.24809 0.25605 0.26357 0.27066 0.2771 0.28309 0.2883 0.29296 0.29708 0.30061 0.30366 0.30623 0.30841 0.31026 0.3118 0.31309 0.31416 0.31503 0.31576 0.31632 0.31673 0.317 0.31712 0.31711 0.31692 0.31659 0.3161 0.3155 0.31478 0.31398 0.3131 0.31214 0.31114 0.31007 0.30895 0.30779 0.30655 0.30528 0.30397 0.3026 0.3013 0.29984 0.29846 0.29706 0.29566 0.29433 0.29299 0.29169 0.29047 0.28926 0.28811 0.28702 0.28599 0.28501 0.28413 0.28336 0.28266 0.28202 0.28145 0.28093 0.28048 0.28005 0.27966 0.2793 0.27896 0.27865 0.27836 0.27807 0.2778 0.27749 0.2772 0.27687 0.27649 0.27608 0.2756 0.27505 0.27443 0.2737 0.27289 0.27196 0.27094 0.26983 0.26858 0.26724 0.26576 0.26419 0.26253 0.26074 0.2589 0.25698 0.25501 0.25302 0.25095 0.24891 0.24685 0.24479 0.24277 0.24072 0.23873 0.23675 0.2348 0.23289 0.231 0.22917 0.22736 0.22559 0.22388 0.22219 0.22056 0.21898 0.21746 0.216 0.21459 0.21327 0.21204 0.21091 0.20989 0.20898 0.20819 0.20752 0.20696 0.20652 0.20621 0.20605 0.2061 0.20641 0.20698 0.20792 0.20918 0.21082 0.21282 0.21516 0.21787 0.22077 0.22382 0.22683 0.22972 0.2324 0.23476 0.23682 0.23843 0.23972 0.24069 0.24134 0.24185 0.24222 0.24255 0.24288 0.24323 0.2436 0.24398 0.24433 0.24466 0.24493 0.24515 0.24534 0.24556 0.24587 0.24629 0.24689 0.24761 0.24844 0.24929 0.25012 0.25088 0.25154 0.25209 0.25253 0.25289 0.25319 0.25342 0.25362 0.25377 0.25391 0.25402 0.25409 0.25408 0.25392 0.25361 0.25308 0.25237 0.25148 0.25042 0.24918 0.24784 0.2464 0.2449 0.24337 0.24179 0.24026 0.23875 0.2373 0.23594 0.23466 0.23346 0.23233 0.23126 0.23024 0.22921 0.22819 0.22711 0.22596 0.22476 0.2235 0.22216 0.22075 0.2194 0.2179 0.21642 0.21497 0.21359 0.21235 0.21128 0.2104 0.20974 0.20937 0.20927 0.20943 0.20991 0.2107 0.21179 0.21318 0.21489 0.21697 0.21963 0.22282 0.22667 0.23117 0.23636 0.2423 0.249 0.25679 0.26546 0.2752 0.286 0.29773 0.31038 0.32367 0.33768 0.35189 0.36629 0.38045 0.39417 0.40743 0.41972 0.43135 0.442 0.45174 0.46052 0.46834 0.4753 0.48111 0.48595 0.48966 0.49218 0.49357 0.49384 0.49312 0.49141 0.48891 0.48587 0.48232 0.47843 0.47433 0.47002 0.46569 0.46127 0.45693 0.45255 0.44827 0.44406 0.43986 0.43572 0.43158 0.42753 0.42348 0.41949 0.41553 0.41159 0.40775 0.40388 0.40019 0.39654 0.39303 0.38967 0.38651 0.38361 0.38089 0.37848 0.37636 0.37457 0.37312 0.37207 0.37139 0.37109 0.37117 0.37168 0.37257 0.37387 0.37557 0.37766 0.38011 0.38289 0.38603 0.38936 0.39303 0.39681 0.40078 0.40487 0.409 0.4132 0.41739 0.42164 0.42582 0.43 0.43399 0.43792 0.44164 0.44526 0.4487 0.45193 0.45507 0.45799 0.46083 0.4635 0.46606 0.46847 0.47074 0.47289 0.47491 0.47679 0.47851 0.48013 0.48156 0.48292 0.48409 0.48514 0.48602 0.48676 0.48733 0.48777 0.48805 0.48816 0.48811 0.48787 0.4875 0.48694 0.48625 0.48535 0.48432 0.4831 0.48171 0.48012 0.47836 0.47648 0.47452 0.47249 0.47045 0.4684 0.4663 0.46422 0.46207 0.45989 0.45758 0.45524 0.45284 0.45046 0.448 0.44557 0.44314 0.44071 0.4383 0.43591 0.4335 0.4311 0.42867 0.42621 0.42375 0.42129 0.41888 0.41645 0.4141 0.41173 0.40945 0.40725 0.40507 0.40297 0.40089 0.39887 0.39686 0.3949 0.39294 0.39106 0.38924 0.3875 0.38583 0.38427 0.38285 0.3816 0.38049 0.37961 0.379 0.37866 0.37867 0.37906 0.37986 0.38114 0.38285 0.38508 0.3878 0.39109 0.39487 0.39921 0.40398 0.40923 0.41482 0.42077 0.42684 0.43305 0.43924 0.44541 0.4515 0.45754 0.46356 0.46965 0.4758 0.482 0.48812 0.49379 0.49879 0.50268 0.50524 0.5065 0.50674 0.50635 0.50582 0.50553 0.50577 0.50663 0.50817 0.51024 0.51262 0.51496 0.51708 0.5187 0.51982 0.52045 0.52068 0.52069 0.52051 0.52014 0.51955 0.51881 0.5179 0.51691 0.51585 0.51486 0.51399 0.51324 0.51259 0.51196 0.51125 0.51031 0.50919 0.50785 0.50647 0.5052 0.50417 0.5034 0.50299 0.50281 0.50276 0.50277 0.50278 0.50277 0.50266 0.50249 0.5023 0.50204 0.5018 0.50162 0.50158 0.50173 0.50209 0.50274 0.50368 0.50498 0.50661 0.50859 0.5109 0.51358 0.51653 0.51973 0.52313 0.52657 0.53017 0.5338 0.53755 0.54126 0.545 0.54873 0.5525 0.55625 0.56003 0.5639 0.56792 0.57202 0.57628 0.58053 0.58497 0.5893 0.59363 0.5977 0.60181 0.60567 0.60957 0.61332 0.61693 0.62056 0.6241 0.62759 0.63101 0.6343 0.63746 0.64053 0.64336 0.64599 0.64839 0.65053 0.65237 0.65395 0.65527 0.65619 0.65688 0.65724 0.65733 0.65715 0.65677 0.6562
-0.027404 -0.027441 -0.027489 -0.027533 -0.027514 -0.027477 -0.02741 -0.027254 -0.027036 -0.026707 -0.026222 -0.02565 -0.024872 -0.023907 -0.022706 -0.021268 -0.019615 -0.017705 -0.015521 -0.013159 -0.010599 -0.0078378 -0.0049506 -0.001929 0.0011366 0.0042592 0.0074505 0.010541 0.013574 0.016581 0.019475 0.02224 0.024859 0.027354 0.029791 0.032093 0.0343 0.036494 0.038643 0.040783 0.042893 0.044954 0.047 0.048927 0.050747 0.052422 0.053889 0.055137 0.056198 0.056979 0.057551 0.057846 0.057925 0.057733 0.057299 0.056608 0.055684 0.054536 0.053178 0.051687 0.050103 0.048424 0.046752 0.04509 0.04346 0.041927 0.040454 0.039111 0.037875 0.036732 0.03573 0.034827 0.034026 0.033342 0.032726 0.032208 0.031748 0.031339 0.030985 0.030654 0.030344 0.030056 0.029781 0.029498 0.029212 0.028906 0.028591 0.02825 0.027878 0.027493 0.027082 0.026661 0.026239 0.025822 0.025428 0.025075 0.024758 0.024497 0.024288 0.024168 0.024116 0.024152 0.024267 0.024492 0.02481 0.025243 0.025803 0.026481 0.027288 0.028235 0.029327 0.030581 0.03197 0.033507 0.035247 0.037103 0.039124 0.041283 0.04356 0.045985 0.048477 0.051028 0.05371 0.056383 0.059101 0.061811 0.064483 0.067184 0.069789 0.072323 0.074815 0.077201 0.079533 0.081772 0.083942 0.086116 0.088192 0.090254 0.092333 0.094489 0.096835 0.099403 0.10226 0.10558 0.10921 0.11331 0.11778 0.12265 0.1281 0.13393 0.1402 0.147 0.15425 0.16202 0.17003 0.17826 0.18686 0.19542 0.20405 0.21257 0.22085 0.22903 0.23673 0.24403 0.2509 0.25715 0.26297 0.26804 0.27258 0.27659 0.28002 0.28298 0.28548 0.2876 0.28941 0.29093 0.29217 0.29324 0.29408 0.29479 0.29536 0.29578 0.29606 0.29619 0.29618 0.296 0.29568 0.29521 0.29463 0.29394 0.29315 0.29229 0.29135 0.29036 0.28928 0.28819 0.28702 0.28581 0.28458 0.28331 0.28198 0.28075 0.27937 0.27803 0.2767 0.27535 0.27402 0.27272 0.27146 0.27024 0.26905 0.26795 0.26688 0.26588 0.26491 0.26406 0.2633 0.26262 0.26199 0.26143 0.26092 0.26048 0.26006 0.25969 0.25933 0.259 0.25869 0.2584 0.25811 0.25783 0.25753 0.25724 0.25691 0.25655 0.25615 0.25567 0.25513 0.25453 0.25382 0.25303 0.25213 0.25115 0.25006 0.24884 0.24752 0.2461 0.24455 0.24294 0.24118 0.23938 0.2375 0.23558 0.23364 0.23163 0.22963 0.22762 0.22562 0.22366 0.22166 0.21972 0.2178 0.21591 0.21407 0.21223 0.21045 0.2087 0.20699 0.20534 0.2037 0.20213 0.20061 0.19914 0.19773 0.19638 0.19511 0.19393 0.19285 0.19187 0.191 0.19026 0.18962 0.18909 0.18868 0.18838 0.18824 0.18829 0.18858 0.18912 0.19 0.19117 0.19272 0.1946 0.19679 0.19934 0.20207 0.20493 0.20775 0.21045 0.21297 0.21515 0.21704 0.21852 0.21967 0.22052 0.22109 0.22153 0.22184 0.22215 0.22245 0.22279 0.22315 0.22352 0.22387 0.22419 0.22448 0.22474 0.22499 0.22528 0.22563 0.22609 0.22671 0.22742 0.22824 0.22906 0.22984 0.23056 0.23116 0.23166 0.23206 0.2324 0.23268 0.23291 0.23313 0.23331 0.23348 0.23362 0.23374 0.23376 0.23365 0.23337 0.23288 0.2322 0.23133 0.23031 0.22912 0.22781 0.22641 0.22495 0.22348 0.22195 0.22047 0.21901 0.21763 0.21633 0.21509 0.21395 0.21286 0.21184 0.21086 0.2099 0.20891 0.20788 0.2068 0.20565 0.20444 0.20317 0.20182 0.20052 0.19908 0.19766 0.19626 0.19494 0.19375 0.19272 0.19187 0.19126 0.19091 0.1908 0.19097 0.19144 0.19221 0.19327 0.19463 0.1963 0.19834 0.20092 0.20405 0.20779 0.21218 0.21724 0.22304 0.22957 0.23721 0.24567 0.25528 0.26584 0.27733 0.28978 0.30285 0.31664 0.33061 0.34482 0.35877 0.37229 0.38534 0.39745 0.40895 0.41944 0.42905 0.4377 0.4454 0.45226 0.45798 0.46272 0.46631 0.46876 0.47005 0.47026 0.46948 0.46773 0.4652 0.46212 0.45857 0.45467 0.45055 0.4463 0.44201 0.43764 0.43332 0.42899 0.42473 0.42054 0.41636 0.41226 0.40811 0.40408 0.40005 0.39611 0.39219 0.38828 0.38447 0.38066 0.377 0.37338 0.3699 0.36661 0.3635 0.36061 0.35791 0.35555 0.35343 0.35166 0.35023 0.34919 0.34849 0.34818 0.34824 0.34872 0.34957 0.35081 0.35245 0.35447 0.35688 0.35956 0.36261 0.36586 0.36941 0.37308 0.37695 0.38093 0.385 0.38912 0.39324 0.39742 0.40153 0.40562 0.40955 0.41342 0.41716 0.42073 0.42417 0.42739 0.43054 0.43347 0.43634 0.43903 0.4416 0.44401 0.44629 0.44846 0.45047 0.45235 0.45409 0.4557 0.45714 0.45846 0.45968 0.4607 0.46161 0.46237 0.46296 0.46341 0.4637 0.46382 0.46379 0.46359 0.46321 0.46269 0.46202 0.46116 0.46017 0.45898 0.45763 0.45607 0.45436 0.45251 0.45057 0.44856 0.44655 0.44448 0.44241 0.44033 0.43817 0.43598 0.43368 0.43135 0.42892 0.42656 0.42413 0.42169 0.41926 0.41686 0.41444 0.41204 0.40966 0.40725 0.40485 0.40244 0.4 0.39754 0.39516 0.3928 0.39048 0.38818 0.38594 0.38377 0.38167 0.37962 0.3776 0.37562 0.37366 0.37176 0.36988 0.36805 0.36629 0.36458 0.36296 0.36147 0.36009 0.35886 0.3578 0.35696 0.35636 0.35608 0.35613 0.35654 0.35735 0.35863 0.36032 0.36256 0.36527 0.3685 0.37222 0.37648 0.38112 0.38627 0.39169 0.39742 0.40329 0.40934 0.41534 0.42133 0.42723 0.43311 0.43897 0.4449 0.4509 0.457 0.46302 0.46861 0.47346 0.47717 0.4796 0.48074 0.4808 0.48025 0.47954 0.47906 0.47912 0.47983 0.48124 0.48318 0.48547 0.48779 0.48996 0.49168 0.49295 0.49373 0.49419 0.49429 0.49424 0.49392 0.4934 0.49267 0.49175 0.49074 0.48971 0.48867 0.48771 0.48682 0.48605 0.4853 0.48447 0.48355 0.48246 0.4812 0.47993 0.47878 0.47784 0.47719 0.47684 0.4767 0.47668 0.47667 0.47669 0.47671 0.47664 0.47651 0.47631 0.47606 0.47581 0.47564 0.47561 0.47575 0.47613 0.47677 0.47765 0.47893 0.4805 0.48245 0.48481 0.48747 0.49039 0.49359 0.49696 0.50042 0.50403 0.50765 0.51133 0.51502 0.5187 0.52242 0.52614 0.52987 0.53366 0.53746 0.54149 0.54556 0.54984 0.55413 0.55852 0.56288 0.56722 0.57139 0.57547 0.57941 0.58332 0.58697 0.59061 0.59427 0.59779 0.60125 0.60468 0.60796 0.61111 0.61422 0.61706 0.61971 0.62208 0.62419 0.62597 0.62756 0.62878 0.62991 0.63062 0.63106 0.63117 0.63104 0.63073 0.6302
-0.02995 -0.030027 -0.030075 -0.030089 -0.030088 -0.030038 -0.029927 -0.029774 -0.029508 -0.029177 -0.028698 -0.028104 -0.027316 -0.026346 -0.025138 -0.02369 -0.02202 -0.020098 -0.017885 -0.015502 -0.012912 -0.010125 -0.0071899 -0.0041211 -0.0010072 0.002136 0.0053387 0.0084705 0.011523 0.014536 0.017422 0.020188 0.022853 0.02537 0.027814 0.030128 0.032401 0.034642 0.036829 0.038999 0.04115 0.043264 0.045354 0.047308 0.049166 0.050877 0.052406 0.053689 0.054764 0.055585 0.056181 0.056492 0.05657 0.056372 0.055943 0.055245 0.054328 0.053173 0.051822 0.050342 0.048775 0.04711 0.04545 0.043805 0.042204 0.040682 0.039222 0.037887 0.036659 0.035539 0.034533 0.033644 0.032855 0.032183 0.031585 0.031076 0.030634 0.030238 0.029897 0.029592 0.029295 0.029025 0.028765 0.028491 0.028218 0.027928 0.027622 0.02728 0.026912 0.026527 0.026116 0.025703 0.025296 0.024875 0.024488 0.024132 0.023812 0.023557 0.023354 0.023234 0.023183 0.023221 0.023336 0.023564 0.02389 0.024333 0.024905 0.025588 0.026403 0.027375 0.028479 0.029747 0.031172 0.032732 0.034498 0.036374 0.038421 0.040616 0.04293 0.04539 0.047923 0.05053 0.053272 0.05602 0.058806 0.061609 0.064388 0.067209 0.069904 0.072537 0.075107 0.077548 0.079896 0.082138 0.084278 0.086415 0.08846 0.090512 0.092608 0.094801 0.097179 0.09976 0.10262 0.10592 0.10953 0.11361 0.11808 0.12299 0.12848 0.13431 0.14061 0.14744 0.1547 0.16246 0.17047 0.17872 0.18733 0.19587 0.20454 0.21307 0.22139 0.22959 0.23733 0.24465 0.25156 0.25783 0.26369 0.26879 0.27335 0.27738 0.28083 0.28379 0.28629 0.28841 0.29022 0.29172 0.29296 0.29402 0.29488 0.2956 0.29616 0.29659 0.29689 0.29702 0.29703 0.29687 0.29657 0.29612 0.29556 0.29487 0.29411 0.29328 0.29237 0.29141 0.29037 0.2893 0.28816 0.28698 0.28576 0.28451 0.28324 0.28199 0.28066 0.27933 0.27801 0.27666 0.27535 0.27406 0.27283 0.27162 0.27046 0.26937 0.26833 0.26735 0.26638 0.26555 0.26481 0.26414 0.26352 0.26298 0.26249 0.26205 0.26166 0.26131 0.26097 0.26064 0.26035 0.26006 0.25979 0.25953 0.25924 0.25895 0.25864 0.25828 0.25789 0.25741 0.25688 0.25628 0.25558 0.2548 0.2539 0.25291 0.25183 0.2506 0.24929 0.24785 0.24631 0.24468 0.24293 0.24112 0.23924 0.2373 0.23534 0.23332 0.2313 0.22929 0.22726 0.22527 0.22326 0.22129 0.21936 0.21744 0.21559 0.21371 0.21191 0.21014 0.20841 0.20673 0.20506 0.20347 0.20192 0.20043 0.199 0.19761 0.19631 0.19511 0.19398 0.19297 0.19206 0.19125 0.19057 0.18999 0.18953 0.18919 0.189 0.18902 0.18927 0.18979 0.19064 0.19179 0.19334 0.19523 0.19743 0.20001 0.20275 0.20563 0.20848 0.21119 0.21372 0.2159 0.21776 0.2192 0.22031 0.22111 0.22163 0.222 0.22227 0.22252 0.22277 0.22305 0.22337 0.22371 0.22406 0.2244 0.22472 0.22503 0.22533 0.22568 0.22611 0.22663 0.22731 0.22807 0.22892 0.22978 0.23059 0.23132 0.23192 0.23244 0.23283 0.23316 0.23346 0.23369 0.23391 0.23412 0.23431 0.23449 0.23463 0.23467 0.23459 0.23432 0.23385 0.23317 0.2323 0.23125 0.23004 0.22872 0.2273 0.22583 0.22432 0.2228 0.22131 0.21985 0.21847 0.21716 0.21593 0.21479 0.21374 0.21276 0.21182 0.2109 0.20996 0.20894 0.20789 0.20677 0.20558 0.20435 0.20305 0.2018 0.2004 0.19901 0.19762 0.19627 0.19504 0.19395 0.19304 0.19237 0.19197 0.19183 0.19195 0.19239 0.1931 0.19413 0.19553 0.19729 0.19943 0.20212 0.20524 0.20893 0.21315 0.21804 0.22368 0.23009 0.23763 0.24605 0.25557 0.26609 0.27752 0.28993 0.30292 0.31672 0.33065 0.34482 0.35869 0.37211 0.38503 0.39703 0.40843 0.41884 0.42843 0.43705 0.44473 0.45156 0.45722 0.46193 0.46554 0.46799 0.46926 0.46948 0.46869 0.46696 0.46446 0.46136 0.45777 0.45388 0.44979 0.44553 0.44125 0.43688 0.43258 0.42825 0.42401 0.41982 0.41566 0.41159 0.40748 0.40347 0.39948 0.39554 0.39165 0.38776 0.38396 0.38018 0.37653 0.37292 0.3695 0.36622 0.36312 0.36024 0.35758 0.35524 0.35317 0.35143 0.35003 0.34901 0.34837 0.3481 0.34821 0.34871 0.3496 0.3509 0.35256 0.35464 0.35705 0.35979 0.36285 0.36616 0.36976 0.37348 0.37739 0.38138 0.38548 0.38965 0.39382 0.39804 0.40219 0.40631 0.41028 0.4142 0.41795 0.42155 0.425 0.42829 0.43148 0.43446 0.43734 0.44006 0.44266 0.44513 0.44742 0.44962 0.45165 0.45357 0.45533 0.45699 0.45845 0.4598 0.46101 0.46208 0.46297 0.46375 0.46435 0.46481 0.46511 0.46521 0.46517 0.46496 0.46462 0.46409 0.46342 0.46257 0.46158 0.46037 0.45901 0.45744 0.45575 0.45386 0.45194 0.4499 0.44784 0.4458 0.44371 0.4416 0.43943 0.43721 0.43491 0.43258 0.43018 0.42778 0.42529 0.42285 0.42041 0.41798 0.41556 0.41313 0.41071 0.40825 0.40582 0.40337 0.40092 0.39843 0.396 0.39356 0.39123 0.3889 0.38665 0.38445 0.3823 0.38019 0.37816 0.37617 0.37417 0.37222 0.37029 0.36845 0.36664 0.36492 0.36324 0.36171 0.36028 0.35899 0.35788 0.35697 0.35633 0.35597 0.35593 0.35628 0.35703 0.35819 0.35984 0.362 0.36465 0.36785 0.37149 0.37569 0.38031 0.38543 0.39087 0.39664 0.40257 0.40864 0.41472 0.42078 0.42676 0.43271 0.43867 0.44467 0.45083 0.45699 0.46317 0.46886 0.47386 0.4777 0.48018 0.48138 0.48146 0.48089 0.48015 0.47964 0.47966 0.48034 0.48169 0.48362 0.48588 0.48818 0.49031 0.49202 0.49324 0.49399 0.4944 0.49455 0.49442 0.49407 0.49352 0.49279 0.49185 0.4908 0.48972 0.48865 0.48762 0.48672 0.48589 0.48507 0.4842 0.48318 0.482 0.48072 0.4794 0.47824 0.4773 0.47667 0.47635 0.47618 0.47619 0.47625 0.4763 0.47632 0.47629 0.47618 0.47593 0.47565 0.47539 0.47518 0.47513 0.47525 0.47564 0.47626 0.47717 0.47842 0.48008 0.48205 0.4844 0.48707 0.49013 0.49339 0.49683 0.50032 0.50398 0.50767 0.51139 0.5151 0.51879 0.52244 0.52616 0.52988 0.53365 0.53746 0.54146 0.54554 0.54983 0.55414 0.55853 0.5629 0.56724 0.57152 0.57565 0.57959 0.58345 0.58707 0.59068 0.59431 0.59782 0.60123 0.60458 0.60788 0.611 0.61401 0.61681 0.6194 0.6218 0.62391 0.62575 0.62735 0.6286 0.62968 0.63036 0.6308 0.63096 0.63083 0.63046 0.62985
-0.030682 -0.03074 -0.030772 -0.030774 -0.030748 -0.0307 -0.030564 -0.030388 -0.03011 -0.029762 -0.029255 -0.028632 -0.0278 -0.026786 -0.025533 -0.024034 -0.022295 -0.020305 -0.018021 -0.015561 -0.012895 -0.010032 -0.0070145 -0.0038596 -0.0006576 0.0025745 0.0058674 0.0090864 0.012229 0.015328 0.018289 0.021129 0.023847 0.026416 0.028907 0.031255 0.033555 0.035816 0.038035 0.040234 0.042418 0.044566 0.046698 0.048692 0.050591 0.052334 0.0539 0.055219 0.056333 0.057186 0.057822 0.058166 0.05828 0.058114 0.057711 0.057024 0.056108 0.054948 0.053574 0.052063 0.050451 0.048734 0.047021 0.045319 0.043665 0.04209 0.040578 0.039204 0.037938 0.036782 0.035749 0.034839 0.034024 0.033329 0.032712 0.03219 0.031731 0.031319 0.030962 0.030651 0.030342 0.030062 0.029786 0.029512 0.029233 0.028932 0.028618 0.028272 0.027904 0.027514 0.0271 0.026675 0.026263 0.025839 0.025448 0.025091 0.024768 0.024508 0.024299 0.024179 0.024126 0.024165 0.024282 0.024509 0.024838 0.025283 0.025854 0.026541 0.027363 0.02834 0.029452 0.030722 0.032156 0.033728 0.035504 0.037397 0.039458 0.041665 0.043989 0.046465 0.049015 0.051635 0.054393 0.057148 0.059962 0.062787 0.065578 0.068416 0.071132 0.073788 0.076383 0.078843 0.081221 0.083475 0.085636 0.087787 0.089856 0.09192 0.094027 0.096235 0.098638 0.10124 0.10413 0.10745 0.11109 0.11518 0.11967 0.12458 0.13008 0.13588 0.1422 0.14903 0.15629 0.16406 0.17205 0.18029 0.18887 0.1974 0.20602 0.21451 0.22278 0.23094 0.23862 0.24589 0.25275 0.25899 0.26483 0.26991 0.27444 0.27844 0.28186 0.28481 0.28728 0.28939 0.2912 0.29269 0.29394 0.29501 0.29587 0.29662 0.29719 0.29764 0.29795 0.29811 0.29813 0.298 0.29772 0.29729 0.29675 0.29608 0.29534 0.29452 0.29362 0.29267 0.29165 0.29059 0.28948 0.28831 0.28712 0.28589 0.28464 0.2834 0.2821 0.28078 0.27948 0.27816 0.27689 0.27563 0.27441 0.27322 0.27207 0.27099 0.26998 0.26902 0.26808 0.26726 0.26652 0.26587 0.26527 0.26473 0.26425 0.26381 0.26342 0.26306 0.26272 0.2624 0.26213 0.26186 0.26158 0.26131 0.26104 0.26074 0.26043 0.26007 0.25967 0.25921 0.25868 0.25809 0.25738 0.25659 0.25571 0.25472 0.25364 0.25243 0.25113 0.2497 0.24817 0.24657 0.24481 0.24303 0.24115 0.23922 0.23728 0.23527 0.23329 0.23127 0.22927 0.2273 0.22531 0.22334 0.22142 0.21952 0.21766 0.21581 0.21401 0.21226 0.21054 0.20888 0.20722 0.20565 0.20411 0.20263 0.20122 0.19985 0.19856 0.19739 0.19629 0.1953 0.19442 0.19366 0.19301 0.19247 0.19204 0.19173 0.19157 0.19162 0.19189 0.19242 0.19329 0.19447 0.19602 0.19791 0.20012 0.20269 0.20543 0.2083 0.21114 0.21386 0.21638 0.21859 0.2205 0.22199 0.22317 0.22405 0.22465 0.2251 0.22544 0.22576 0.22608 0.22642 0.22678 0.22716 0.22752 0.22786 0.22815 0.22841 0.22864 0.2289 0.22924 0.2297 0.23031 0.23103 0.23185 0.23269 0.23349 0.23422 0.23484 0.23536 0.2358 0.23616 0.23647 0.23673 0.23694 0.23714 0.2373 0.23744 0.23756 0.23756 0.23745 0.23716 0.23668 0.23601 0.23516 0.23413 0.23295 0.23166 0.23027 0.22883 0.22736 0.22587 0.2244 0.22297 0.22161 0.22032 0.21911 0.218 0.21696 0.216 0.21507 0.21416 0.21323 0.21223 0.21117 0.21006 0.20887 0.20764 0.20636 0.2051 0.20373 0.20235 0.20097 0.19965 0.19844 0.19734 0.19646 0.19579 0.1954 0.19525 0.19536 0.1958 0.19652 0.19753 0.19892 0.20066 0.20278 0.20543 0.20852 0.21216 0.21634 0.22118 0.22678 0.23312 0.24058 0.24891 0.25831 0.26869 0.27997 0.29218 0.30498 0.31857 0.33227 0.34621 0.35985 0.37301 0.3857 0.39748 0.40866 0.41888 0.42827 0.43672 0.44424 0.45092 0.45647 0.46107 0.46458 0.467 0.46823 0.46847 0.46771 0.46602 0.46358 0.46058 0.45707 0.45329 0.4493 0.44514 0.44097 0.43672 0.43249 0.42829 0.42414 0.42006 0.41597 0.41199 0.408 0.40408 0.40016 0.39631 0.39251 0.38872 0.385 0.3813 0.37773 0.3742 0.37086 0.36767 0.36462 0.36182 0.35921 0.35692 0.35488 0.35318 0.35181 0.3508 0.35017 0.34988 0.34998 0.35047 0.3513 0.35257 0.35417 0.35615 0.3585 0.36119 0.36417 0.36738 0.37089 0.37451 0.37833 0.38224 0.38623 0.39031 0.39437 0.39851 0.40256 0.40658 0.41048 0.4143 0.41797 0.42149 0.42487 0.42808 0.43121 0.43415 0.43698 0.43962 0.44218 0.44458 0.44683 0.44898 0.45094 0.45279 0.45448 0.45607 0.45745 0.45875 0.45989 0.46091 0.46176 0.46248 0.46308 0.46351 0.46379 0.46388 0.46382 0.4636 0.46322 0.46271 0.46206 0.46122 0.46022 0.45904 0.4577 0.45616 0.45447 0.45262 0.45075 0.44873 0.44673 0.4447 0.44266 0.44062 0.43849 0.43636 0.4341 0.43183 0.42945 0.42711 0.4247 0.42232 0.41991 0.41754 0.41517 0.41279 0.41044 0.40807 0.40572 0.40328 0.4009 0.39849 0.39614 0.3938 0.39153 0.38925 0.38708 0.38494 0.38284 0.38082 0.37881 0.37686 0.37492 0.37304 0.37116 0.36937 0.36762 0.36594 0.36438 0.36292 0.36156 0.36035 0.35932 0.35849 0.35791 0.35762 0.35766 0.35805 0.35886 0.3601 0.3618 0.36399 0.36666 0.36983 0.37348 0.37766 0.38222 0.38724 0.39253 0.39815 0.40394 0.40978 0.41562 0.42147 0.42723 0.43297 0.43872 0.44454 0.45051 0.45644 0.46237 0.46784 0.47265 0.47631 0.47873 0.47988 0.47996 0.47951 0.47884 0.47842 0.47849 0.47922 0.48064 0.48256 0.48479 0.48702 0.48908 0.49074 0.49196 0.49272 0.49312 0.49328 0.49314 0.49279 0.49227 0.49157 0.49072 0.48971 0.48868 0.48765 0.48671 0.48587 0.48509 0.48436 0.48354 0.48259 0.48147 0.48022 0.47896 0.47781 0.47687 0.47627 0.47592 0.4758 0.47581 0.47587 0.47592 0.47593 0.4759 0.4758 0.47556 0.4753 0.475 0.47481 0.47478 0.47492 0.47523 0.4758 0.4767 0.47789 0.47945 0.48132 0.48361 0.48623 0.48911 0.49226 0.49552 0.49892 0.50246 0.50597 0.50954 0.51308 0.5167 0.52018 0.52379 0.52735 0.53099 0.5347 0.53859 0.54257 0.54671 0.5508 0.55503 0.55929 0.56348 0.56757 0.57156 0.5754 0.5791 0.58263 0.58614 0.58964 0.59303 0.59635 0.5996 0.60276 0.60579 0.60872 0.6115 0.61404 0.61629 0.61837 0.62016 0.6217 0.62291 0.62396 0.62464 0.62503 0.62518 0.62502 0.62469 0.62399
-0.032631 -0.032696 -0.032737 -0.032744 -0.032721 -0.032671 -0.032547 -0.032371 -0.032089 -0.03175 -0.031247 -0.030619 -0.029793 -0.02878 -0.027527 -0.026034 -0.024296 -0.022315 -0.020034 -0.017584 -0.01492 -0.012061 -0.009057 -0.0059219 -0.0027384 0.0004611 0.0037219 0.0069102 0.010018 0.013073 0.016003 0.018805 0.0215 0.02404 0.026512 0.028848 0.031141 0.033396 0.035591 0.037778 0.039943 0.042072 0.044178 0.04614 0.04801 0.049726 0.051262 0.052558 0.053639 0.054465 0.055071 0.055377 0.05546 0.055272 0.054849 0.054147 0.053223 0.052063 0.050705 0.049217 0.047639 0.04596 0.044286 0.042627 0.041015 0.039478 0.038009 0.036664 0.035427 0.034298 0.033284 0.032396 0.0316 0.030925 0.030327 0.029822 0.029377 0.028984 0.028632 0.028337 0.028039 0.027765 0.027504 0.02724 0.02697 0.026674 0.026373 0.026036 0.025675 0.025293 0.024889 0.024474 0.024071 0.023658 0.023275 0.02293 0.022615 0.022363 0.022168 0.022049 0.022009 0.022054 0.022182 0.02242 0.022759 0.023214 0.023796 0.024492 0.025319 0.026301 0.027418 0.0287 0.030141 0.031717 0.033498 0.035388 0.037451 0.039658 0.04198 0.044454 0.047 0.049621 0.052372 0.055117 0.057924 0.060738 0.063519 0.066355 0.069063 0.071707 0.074299 0.076753 0.079119 0.081373 0.083522 0.085673 0.087737 0.0898 0.09191 0.094121 0.096515 0.099122 0.10201 0.10533 0.10897 0.11307 0.11757 0.12251 0.12803 0.13389 0.14022 0.14708 0.15438 0.16219 0.17022 0.17849 0.18712 0.19569 0.20436 0.2129 0.22121 0.22942 0.23716 0.24449 0.2514 0.25769 0.26357 0.26869 0.27326 0.27729 0.28074 0.2837 0.28619 0.28831 0.29013 0.29163 0.29286 0.29393 0.2948 0.29552 0.2961 0.29654 0.29684 0.29699 0.297 0.29684 0.29656 0.29612 0.29557 0.29489 0.29413 0.29331 0.29239 0.29142 0.29038 0.2893 0.28818 0.287 0.28579 0.28453 0.28325 0.28201 0.28066 0.27933 0.27802 0.27667 0.27537 0.27409 0.27283 0.27164 0.27047 0.26936 0.26833 0.26734 0.26637 0.26554 0.26479 0.26412 0.26351 0.26296 0.26246 0.26202 0.26162 0.26126 0.26092 0.26061 0.26032 0.26004 0.25977 0.2595 0.25922 0.25894 0.25864 0.25828 0.25788 0.25742 0.25689 0.2563 0.2556 0.25482 0.25394 0.25294 0.25187 0.25065 0.24935 0.24792 0.24638 0.24477 0.24301 0.24121 0.23933 0.23739 0.23544 0.23341 0.2314 0.22937 0.22735 0.22535 0.22334 0.22137 0.21943 0.21751 0.21564 0.21377 0.21195 0.21017 0.20843 0.20675 0.20508 0.20348 0.20192 0.20041 0.19897 0.19758 0.19627 0.19505 0.19392 0.19289 0.19196 0.19114 0.19044 0.18985 0.18937 0.18902 0.18882 0.18883 0.18907 0.18957 0.1904 0.19155 0.19308 0.19496 0.19715 0.1997 0.20242 0.20527 0.20808 0.21076 0.21324 0.21539 0.21721 0.21861 0.21967 0.22043 0.22093 0.22129 0.22154 0.22179 0.22204 0.22233 0.22264 0.22299 0.22334 0.22368 0.22402 0.22434 0.22466 0.22502 0.22547 0.22601 0.2267 0.22748 0.22833 0.22918 0.23 0.23072 0.23131 0.23182 0.23222 0.23255 0.23285 0.23308 0.23331 0.23353 0.23374 0.23393 0.23409 0.23415 0.23408 0.23382 0.23334 0.23267 0.2318 0.23075 0.22953 0.2282 0.22679 0.22531 0.22382 0.22228 0.22079 0.21933 0.21795 0.21663 0.2154 0.21428 0.21323 0.21226 0.21133 0.21041 0.20947 0.20847 0.20742 0.2063 0.20511 0.20388 0.20258 0.20133 0.19994 0.19856 0.19716 0.19581 0.1946 0.1935 0.1926 0.19194 0.19154 0.19141 0.19153 0.19198 0.19272 0.19377 0.19517 0.19694 0.19912 0.20182 0.20499 0.20868 0.21293 0.21784 0.22349 0.22994 0.2375 0.24593 0.25547 0.26597 0.27738 0.28973 0.30269 0.31645 0.33031 0.3444 0.35822 0.37155 0.38443 0.39637 0.40774 0.4181 0.42768 0.4363 0.44397 0.45079 0.45649 0.46122 0.46484 0.46731 0.46863 0.46889 0.46814 0.46644 0.46397 0.46091 0.45736 0.45347 0.44941 0.44516 0.44092 0.43656 0.43227 0.42798 0.42374 0.41958 0.41542 0.41134 0.40724 0.40325 0.39925 0.3953 0.39141 0.38754 0.38373 0.37996 0.37631 0.37272 0.36929 0.366 0.36289 0.36 0.35732 0.35497 0.35288 0.35112 0.34969 0.34865 0.34798 0.34766 0.3477 0.34818 0.34901 0.35023 0.35181 0.35381 0.35616 0.35883 0.36183 0.36506 0.36856 0.37221 0.37606 0.37999 0.38402 0.38813 0.39222 0.39641 0.40047 0.40455 0.40849 0.41236 0.41606 0.41966 0.42312 0.42639 0.42958 0.43256 0.43546 0.43819 0.44079 0.44326 0.44556 0.44778 0.4498 0.45172 0.45346 0.4551 0.45655 0.45787 0.45906 0.46011 0.461 0.46176 0.46236 0.4628 0.4631 0.46319 0.46315 0.46293 0.46256 0.46201 0.46134 0.46049 0.45947 0.45827 0.45692 0.45536 0.45365 0.45173 0.4498 0.44776 0.44568 0.44361 0.44151 0.43939 0.43721 0.43499 0.43268 0.43036 0.42793 0.42552 0.42303 0.42059 0.41811 0.41566 0.41323 0.41079 0.40836 0.40591 0.40348 0.40101 0.39856 0.39608 0.39367 0.39124 0.38893 0.3866 0.38437 0.38219 0.38004 0.37797 0.37592 0.37393 0.37195 0.37003 0.36813 0.36632 0.36449 0.3628 0.36113 0.3596 0.35817 0.35689 0.35578 0.35489 0.35425 0.35387 0.35381 0.35413 0.35487 0.35602 0.35764 0.35974 0.36234 0.36551 0.36911 0.37326 0.37783 0.3829 0.38824 0.39395 0.39979 0.40581 0.41177 0.41777 0.42366 0.42956 0.43547 0.4414 0.44755 0.45368 0.45979 0.46548 0.47045 0.47424 0.47673 0.47784 0.47788 0.47723 0.47646 0.47591 0.47585 0.47645 0.47781 0.47966 0.48188 0.48417 0.48631 0.48809 0.48934 0.49021 0.49068 0.49084 0.49079 0.49045 0.48993 0.48919 0.48826 0.48721 0.48608 0.48499 0.48393 0.48299 0.48211 0.48129 0.48039 0.47937 0.4782 0.47694 0.47564 0.4745 0.47361 0.47301 0.47268 0.47258 0.47261 0.47269 0.47274 0.47277 0.47272 0.47264 0.47241 0.47212 0.47185 0.47165 0.47159 0.47173 0.47205 0.47272 0.47364 0.4749 0.47651 0.47852 0.48088 0.48359 0.48662 0.48988 0.49332 0.49679 0.5005 0.50414 0.50788 0.51155 0.51524 0.51894 0.52258 0.52625 0.52996 0.5338 0.53781 0.54184 0.54607 0.55031 0.55469 0.55899 0.56336 0.56754 0.57161 0.57556 0.57939 0.58298 0.58656 0.59008 0.59359 0.59695 0.60031 0.60363 0.60671 0.60965 0.61246 0.61505 0.61737 0.61948 0.62129 0.62291 0.62417 0.62514 0.62583 0.62627 0.62639 0.62626 0.62587 0.62536
-0.024281 -0.024379 -0.024454 -0.024492 -0.024513 -0.024492 -0.02439 -0.024246 -0.023997 -0.023659 -0.023164 -0.022533 -0.021702 -0.020655 -0.019363 -0.017802 -0.015971 -0.013875 -0.01147 -0.0088695 -0.0060393 -0.0029971 0.0002056 0.0035643 0.0069696 0.010413 0.013924 0.017361 0.020724 0.02404 0.027218 0.030271 0.033199 0.035962 0.038651 0.041192 0.043682 0.046136 0.048532 0.050916 0.053282 0.05561 0.057921 0.06007 0.062111 0.063992 0.065665 0.067072 0.068252 0.069152 0.069808 0.070144 0.070225 0.070006 0.069518 0.068725 0.067684 0.066381 0.064847 0.063165 0.061379 0.059482 0.057587 0.055719 0.053903 0.052175 0.050515 0.049003 0.047612 0.046339 0.045202 0.044196 0.043296 0.042525 0.041843 0.041263 0.040753 0.040295 0.039891 0.039544 0.039199 0.038882 0.038578 0.038273 0.037957 0.037617 0.037269 0.036889 0.036475 0.036043 0.035582 0.035112 0.034644 0.03417 0.033731 0.03333 0.032968 0.032669 0.032434 0.032286 0.032215 0.032241 0.032351 0.032585 0.032931 0.033402 0.034014 0.034752 0.035629 0.036681 0.037879 0.039251 0.040796 0.042497 0.044415 0.046454 0.04869 0.051083 0.05361 0.056298 0.059074 0.06193 0.064927 0.067933 0.070995 0.074077 0.07713 0.080235 0.083208 0.086111 0.088946 0.091633 0.094226 0.096704 0.099069 0.10142 0.10368 0.10595 0.10826 0.11068 0.11331 0.11615 0.11929 0.12289 0.12682 0.13125 0.1361 0.14136 0.14725 0.15355 0.16043 0.16783 0.17567 0.18406 0.1927 0.20159 0.21088 0.22009 0.22939 0.23855 0.24745 0.25623 0.2645 0.27232 0.27969 0.28637 0.2926 0.29802 0.30288 0.30717 0.31086 0.31405 0.31674 0.31904 0.321 0.32263 0.32398 0.32514 0.32606 0.32685 0.32745 0.32793 0.32825 0.32841 0.32845 0.32828 0.32798 0.32752 0.32695 0.32623 0.32544 0.32458 0.32363 0.32262 0.32156 0.32043 0.31927 0.31804 0.31676 0.31547 0.31408 0.31275 0.31135 0.30995 0.30857 0.30717 0.3058 0.30444 0.30313 0.30185 0.30062 0.29951 0.29843 0.29738 0.29635 0.29547 0.29467 0.29396 0.2933 0.29271 0.2922 0.29172 0.2913 0.29089 0.29052 0.29017 0.28986 0.28955 0.28925 0.28895 0.28865 0.28836 0.28804 0.28766 0.28724 0.28674 0.28617 0.28553 0.28477 0.28393 0.28298 0.28193 0.28077 0.27946 0.27805 0.27651 0.27487 0.27313 0.27125 0.26932 0.2673 0.26522 0.26312 0.26095 0.2588 0.25664 0.25448 0.25236 0.25021 0.2481 0.24602 0.24397 0.24198 0.23999 0.23806 0.23616 0.23431 0.23252 0.23073 0.22903 0.22737 0.22577 0.22425 0.22277 0.22139 0.2201 0.21891 0.21784 0.21688 0.21606 0.21536 0.21478 0.21432 0.21399 0.21383 0.21389 0.21422 0.21482 0.21581 0.21713 0.21887 0.22099 0.22345 0.22633 0.22937 0.23257 0.23572 0.23874 0.24155 0.244 0.24612 0.24777 0.24905 0.25002 0.25069 0.25118 0.25155 0.25189 0.25222 0.25259 0.25298 0.25337 0.25375 0.25409 0.25438 0.25463 0.25485 0.2551 0.25544 0.2559 0.25653 0.25729 0.25816 0.25905 0.25992 0.2607 0.26135 0.2619 0.26233 0.26269 0.26299 0.26321 0.2634 0.26357 0.26372 0.26385 0.26393 0.26392 0.26378 0.26345 0.26291 0.26217 0.26122 0.2601 0.25881 0.2574 0.25589 0.25432 0.25272 0.25109 0.2495 0.24794 0.24646 0.24507 0.24375 0.24254 0.24141 0.24037 0.23937 0.23837 0.23737 0.23629 0.23515 0.23395 0.23268 0.23136 0.22998 0.22862 0.22714 0.22565 0.22414 0.2227 0.22139 0.22019 0.21922 0.21849 0.21805 0.21788 0.218 0.21844 0.2192 0.22028 0.22175 0.22361 0.22588 0.22873 0.23204 0.23594 0.24041 0.24559 0.25156 0.25834 0.2663 0.27512 0.28515 0.29624 0.30825 0.32123 0.3348 0.34919 0.36368 0.37841 0.39278 0.40668 0.4201 0.43251 0.44426 0.45503 0.46486 0.47376 0.48168 0.48873 0.49459 0.49944 0.50318 0.50573 0.50707 0.50732 0.50655 0.50483 0.5023 0.49919 0.49557 0.49162 0.48749 0.48317 0.47881 0.47438 0.47002 0.46564 0.46135 0.45711 0.45286 0.44872 0.44459 0.44051 0.43644 0.43242 0.42845 0.42448 0.42058 0.41668 0.41293 0.40921 0.40569 0.4023 0.39909 0.39611 0.39335 0.39091 0.38875 0.38695 0.38548 0.38441 0.38372 0.38341 0.38351 0.38404 0.38496 0.38627 0.38801 0.39016 0.39269 0.39554 0.39873 0.40219 0.40591 0.40979 0.41385 0.418 0.42223 0.42656 0.43088 0.43525 0.43953 0.44381 0.4479 0.45192 0.45575 0.4594 0.46292 0.46624 0.46946 0.47244 0.47532 0.47802 0.48064 0.48309 0.4854 0.4876 0.48963 0.49156 0.49333 0.49496 0.49642 0.49778 0.49899 0.50006 0.50101 0.5018 0.50243 0.5029 0.50325 0.5034 0.5034 0.50322 0.5029 0.50241 0.50177 0.50096 0.49995 0.49879 0.49742 0.49584 0.49412 0.49224 0.49031 0.48827 0.48621 0.48421 0.48213 0.48004 0.47787 0.47567 0.47336 0.47102 0.46857 0.46612 0.46364 0.4612 0.45871 0.45627 0.45383 0.45138 0.44899 0.44648 0.444 0.44149 0.43898 0.43646 0.43399 0.43153 0.42913 0.42672 0.42441 0.42216 0.41996 0.41781 0.4157 0.41363 0.41158 0.4096 0.40761 0.40573 0.40383 0.40204 0.40032 0.39872 0.39724 0.3959 0.39473 0.3938 0.39312 0.39274 0.39272 0.39311 0.3939 0.39517 0.39692 0.39917 0.40195 0.40529 0.40907 0.41349 0.41832 0.42363 0.42929 0.43529 0.44142 0.44772 0.45396 0.46021 0.4664 0.47256 0.4787 0.48486 0.49119 0.49752 0.50381 0.50963 0.51472 0.51871 0.52128 0.52256 0.52275 0.5223 0.5217 0.52134 0.52156 0.52244 0.52401 0.5261 0.52853 0.53088 0.533 0.5346 0.53568 0.53626 0.53646 0.53639 0.53617 0.53576 0.53517 0.53441 0.53349 0.53245 0.53136 0.53034 0.52943 0.52865 0.52797 0.52732 0.52658 0.52563 0.52448 0.52309 0.52162 0.5203 0.51928 0.51855 0.51817 0.51798 0.51795 0.51801 0.51806 0.51802 0.51796 0.51785 0.51759 0.51731 0.51704 0.51682 0.51674 0.51685 0.5172 0.51784 0.51872 0.51999 0.52156 0.52352 0.52591 0.52856 0.5315 0.53472 0.5381 0.54162 0.54524 0.54879 0.55252 0.55622 0.55992 0.56354 0.56722 0.57085 0.57461 0.57842 0.58245 0.58653 0.59075 0.595 0.59945 0.60382 0.60801 0.61224 0.61636 0.62031 0.6241 0.62785 0.63146 0.635 0.63853 0.64193 0.64523 0.6485 0.6516 0.65453 0.65727 0.65993 0.66222 0.6643 0.66612 0.66771 0.66895 0.66994 0.67061 0.67112 0.67117 0.67105 0.67063 0.66996
-0.025312 -0.025412 -0.025487 -0.025525 -0.025547 -0.025517 -0.025412 -0.025277 -0.025013 -0.024673 -0.024175 -0.023547 -0.022716 -0.021676 -0.02039 -0.018845 -0.017032 -0.014966 -0.012597 -0.010043 -0.0072592 -0.0042796 -0.0011394 0.0021443 0.0054895 0.0088656 0.012311 0.015693 0.018999 0.022269 0.0254 0.028406 0.031282 0.033987 0.036618 0.039106 0.041533 0.043925 0.046272 0.048605 0.050931 0.053226 0.055493 0.057611 0.059621 0.061467 0.063106 0.064494 0.065657 0.066538 0.06719 0.067536 0.067639 0.067445 0.066994 0.066234 0.065224 0.063938 0.062419 0.060749 0.058966 0.057065 0.055174 0.05329 0.051465 0.049733 0.048069 0.04656 0.04517 0.043897 0.042758 0.041751 0.040848 0.040073 0.039381 0.038795 0.038281 0.037819 0.037419 0.037067 0.036725 0.03641 0.036111 0.035809 0.035507 0.035182 0.034848 0.034474 0.034071 0.033649 0.033194 0.032728 0.032272 0.031805 0.03137 0.030971 0.030604 0.030306 0.030064 0.029912 0.029835 0.029852 0.02995 0.03017 0.030494 0.030937 0.031522 0.032222 0.033059 0.034071 0.035218 0.036533 0.038017 0.039649 0.041499 0.04347 0.045621 0.047919 0.050362 0.052963 0.055644 0.058405 0.061318 0.064236 0.067216 0.070217 0.073185 0.076214 0.079111 0.081941 0.084714 0.087335 0.089861 0.092266 0.09456 0.096855 0.09905 0.10125 0.10348 0.10582 0.10836 0.11109 0.11411 0.11757 0.12132 0.12556 0.13018 0.13522 0.14083 0.14678 0.15334 0.16041 0.16792 0.17597 0.18428 0.19283 0.20177 0.21066 0.21964 0.22849 0.23711 0.24563 0.25364 0.26123 0.26839 0.27489 0.28097 0.28625 0.29098 0.29517 0.29878 0.3019 0.30455 0.3068 0.30873 0.31034 0.31167 0.31282 0.31376 0.31455 0.31518 0.31568 0.31602 0.31621 0.31627 0.31614 0.31588 0.31546 0.31492 0.31427 0.31354 0.31271 0.31183 0.3109 0.30992 0.3089 0.30782 0.30669 0.30551 0.30428 0.30302 0.30178 0.30041 0.29907 0.29775 0.29639 0.29508 0.29378 0.29252 0.2913 0.29012 0.28899 0.28791 0.28689 0.2859 0.28503 0.28425 0.28355 0.28291 0.28235 0.28183 0.28135 0.28093 0.28053 0.28017 0.27982 0.27949 0.2792 0.27893 0.27864 0.27836 0.27805 0.27773 0.27736 0.27696 0.27649 0.27595 0.27534 0.27461 0.27379 0.27286 0.27183 0.27072 0.26945 0.26809 0.2666 0.26501 0.26332 0.2615 0.25962 0.25766 0.25565 0.25362 0.25153 0.24944 0.24735 0.24526 0.2432 0.24112 0.23909 0.23708 0.23511 0.23318 0.23125 0.22939 0.22756 0.22577 0.22404 0.22233 0.22068 0.21909 0.21755 0.21609 0.21467 0.21335 0.21213 0.211 0.21 0.20911 0.20836 0.20772 0.20722 0.20682 0.20654 0.20643 0.20654 0.2069 0.20754 0.20854 0.20987 0.21161 0.21371 0.21613 0.21896 0.22195 0.2251 0.2282 0.23117 0.23395 0.23638 0.2385 0.24019 0.24152 0.24253 0.24324 0.24378 0.2442 0.24459 0.24496 0.24535 0.24574 0.24615 0.24651 0.24683 0.24707 0.24726 0.2474 0.24755 0.24779 0.24815 0.24869 0.24936 0.25015 0.25096 0.25178 0.25252 0.25315 0.25369 0.2541 0.25445 0.25475 0.25495 0.25511 0.25522 0.2553 0.25536 0.25539 0.25532 0.25515 0.25479 0.25424 0.25351 0.2526 0.25152 0.25028 0.24893 0.24748 0.24598 0.24446 0.2429 0.24137 0.23987 0.23846 0.23711 0.23585 0.23468 0.23359 0.23258 0.23161 0.23064 0.22966 0.22861 0.22751 0.22634 0.22511 0.22383 0.22248 0.22119 0.21975 0.21832 0.21687 0.21547 0.21419 0.21303 0.21208 0.21135 0.2109 0.21072 0.21082 0.21121 0.21191 0.21293 0.2143 0.21605 0.21819 0.22088 0.22401 0.22771 0.23197 0.23689 0.24257 0.24904 0.25667 0.26518 0.27476 0.28545 0.29703 0.30957 0.3227 0.33668 0.35078 0.36511 0.37914 0.39266 0.40578 0.41794 0.42945 0.44 0.44968 0.45839 0.46613 0.47305 0.47881 0.48356 0.48721 0.48971 0.49104 0.49127 0.49054 0.48883 0.48634 0.48328 0.4797 0.47584 0.47178 0.46753 0.46329 0.45896 0.45468 0.45042 0.44623 0.4421 0.43799 0.43397 0.42992 0.42598 0.42204 0.41815 0.41429 0.41044 0.40668 0.40289 0.39925 0.39567 0.39224 0.38898 0.38588 0.38301 0.38035 0.37801 0.37595 0.37422 0.37283 0.37183 0.3712 0.37096 0.3711 0.37166 0.37262 0.37398 0.37573 0.37788 0.38041 0.38325 0.38644 0.38985 0.3936 0.39745 0.4015 0.40566 0.40988 0.41417 0.41847 0.42283 0.42705 0.43129 0.43537 0.43937 0.44314 0.44676 0.45021 0.45346 0.4566 0.45952 0.46237 0.46502 0.46758 0.46997 0.47224 0.47436 0.47635 0.47824 0.47997 0.48157 0.48303 0.48437 0.48556 0.48662 0.48753 0.48831 0.48894 0.48941 0.48973 0.48988 0.48989 0.48971 0.4894 0.48891 0.48825 0.48743 0.48649 0.48532 0.48398 0.48244 0.48078 0.47894 0.47706 0.47507 0.4731 0.4711 0.4691 0.46707 0.46497 0.46281 0.46059 0.4583 0.45594 0.45355 0.45115 0.44875 0.44638 0.44399 0.44161 0.43922 0.43687 0.43447 0.43206 0.42963 0.42719 0.42473 0.42231 0.4199 0.41752 0.41518 0.41294 0.41071 0.40857 0.40647 0.4044 0.40239 0.40039 0.39845 0.39651 0.39465 0.39282 0.3911 0.38943 0.38788 0.38646 0.38515 0.38401 0.38313 0.38249 0.38215 0.38216 0.38256 0.38337 0.38466 0.38641 0.38866 0.39143 0.39476 0.39854 0.40287 0.40761 0.41285 0.41841 0.4243 0.43035 0.43649 0.44265 0.44879 0.45483 0.46086 0.46687 0.47291 0.47908 0.48523 0.49139 0.49708 0.50205 0.50591 0.50846 0.50969 0.50991 0.50947 0.50891 0.50862 0.50885 0.50974 0.5113 0.51338 0.51573 0.51807 0.5201 0.52167 0.52269 0.52324 0.52339 0.52336 0.5231 0.52266 0.52209 0.52132 0.52043 0.51941 0.51838 0.5174 0.5165 0.51577 0.51511 0.51449 0.51381 0.51287 0.5117 0.51035 0.50891 0.5076 0.50653 0.50581 0.50539 0.5052 0.50512 0.50514 0.50515 0.5051 0.505 0.50491 0.50466 0.50437 0.50403 0.50383 0.50375 0.50388 0.50421 0.50477 0.50561 0.50682 0.50836 0.51021 0.51252 0.5151 0.51802 0.52116 0.52442 0.52778 0.53137 0.53491 0.53857 0.54217 0.54582 0.5494 0.55303 0.55669 0.56042 0.56418 0.5681 0.57212 0.57633 0.58059 0.58491 0.58927 0.59356 0.59774 0.6017 0.60568 0.60952 0.6132 0.61682 0.62043 0.62388 0.62726 0.6307 0.63391 0.63702 0.63997 0.64275 0.64526 0.64764 0.64971 0.6515 0.653 0.65429 0.6553 0.65595 0.65641 0.65647 0.65635 0.65596 0.65531
-0.0064006 -0.0065673 -0.0067148 -0.0068302 -0.0069184 -0.0069557 -0.0069274 -0.0068511 -0.0066575 -0.0063935 -0.005973 -0.0054251 -0.0046527 -0.0036849 -0.0024476 -0.0009496 0.0008223 0.0028586 0.0052292 0.0078092 0.010634 0.013683 0.016917 0.020314 0.02378 0.027303 0.03091 0.034454 0.037929 0.041365 0.044666 0.047839 0.050877 0.05375 0.056549 0.059205 0.061803 0.064358 0.066859 0.069362 0.071845 0.074292 0.076719 0.078974 0.081125 0.083102 0.08486 0.08634 0.08757 0.088506 0.089186 0.089528 0.089602 0.089346 0.088814 0.087953 0.086819 0.0854 0.083738 0.081915 0.079976 0.07792 0.075873 0.073839 0.071869 0.069991 0.068191 0.066548 0.065029 0.063638 0.062391 0.061289 0.060298 0.059449 0.058686 0.058041 0.057466 0.056949 0.056492 0.056093 0.055704 0.055338 0.054982 0.054628 0.054265 0.053881 0.053487 0.053053 0.052587 0.052094 0.05158 0.051047 0.050524 0.049995 0.049501 0.049053 0.048638 0.048308 0.048032 0.047858 0.047762 0.047777 0.04788 0.048114 0.048469 0.048959 0.049596 0.050374 0.051299 0.052413 0.053683 0.05514 0.056786 0.058592 0.060644 0.062826 0.065215 0.067774 0.070472 0.073357 0.076327 0.079388 0.082597 0.085813 0.089097 0.092398 0.095665 0.098979 0.10215 0.10525 0.10828 0.11115 0.11392 0.11656 0.11907 0.12158 0.12398 0.1264 0.12886 0.13144 0.13425 0.13728 0.14064 0.14447 0.14865 0.15337 0.15854 0.16421 0.17052 0.17724 0.18455 0.19241 0.20075 0.20966 0.21883 0.22823 0.23806 0.2478 0.25761 0.26725 0.27661 0.28586 0.29453 0.3027 0.31042 0.31739 0.32388 0.32953 0.33459 0.33905 0.34289 0.3462 0.349 0.35138 0.35342 0.35511 0.35649 0.35769 0.35864 0.35946 0.3601 0.36058 0.36091 0.36107 0.36108 0.36091 0.36059 0.3601 0.3595 0.35876 0.35794 0.35703 0.35604 0.35498 0.35387 0.3527 0.35147 0.35017 0.34883 0.34747 0.34608 0.34471 0.34325 0.34179 0.34034 0.33886 0.33741 0.33598 0.33459 0.33324 0.33192 0.33068 0.32953 0.32841 0.32733 0.32641 0.32558 0.32484 0.32414 0.32353 0.32297 0.32247 0.32202 0.32159 0.32119 0.32081 0.32047 0.32015 0.31983 0.31953 0.31921 0.31889 0.31854 0.31814 0.3177 0.31717 0.31658 0.31591 0.31512 0.31425 0.31327 0.31216 0.31096 0.3096 0.30815 0.30655 0.30485 0.30305 0.30109 0.2991 0.297 0.29485 0.29266 0.29042 0.28819 0.28594 0.2837 0.28149 0.27924 0.27706 0.2749 0.27277 0.27069 0.26862 0.2666 0.26463 0.2627 0.26083 0.25898 0.25721 0.25548 0.25382 0.25224 0.25071 0.24928 0.24796 0.24674 0.24566 0.24469 0.24386 0.24317 0.2426 0.24216 0.24186 0.24173 0.24183 0.24219 0.24286 0.24393 0.24535 0.24721 0.24946 0.25208 0.25513 0.25835 0.26174 0.26509 0.2683 0.27131 0.27395 0.27627 0.27809 0.27955 0.28066 0.28142 0.28202 0.28248 0.2829 0.28331 0.28374 0.28418 0.28462 0.28502 0.28536 0.28563 0.28584 0.28597 0.28615 0.28641 0.28681 0.28741 0.28815 0.28903 0.28994 0.29084 0.29166 0.29237 0.29297 0.29346 0.29386 0.2942 0.29444 0.29464 0.29479 0.29489 0.29497 0.29502 0.29496 0.29479 0.29444 0.29387 0.29311 0.29213 0.29099 0.28967 0.28822 0.28667 0.28505 0.2834 0.28173 0.28008 0.27847 0.27694 0.27549 0.27412 0.27287 0.27169 0.27059 0.26954 0.2685 0.26743 0.2663 0.26511 0.26385 0.26253 0.26115 0.25971 0.2583 0.25675 0.2552 0.25364 0.25213 0.25077 0.24951 0.2485 0.24774 0.24729 0.24712 0.24726 0.24772 0.24852 0.24965 0.2512 0.25316 0.25554 0.25853 0.26199 0.26606 0.27072 0.2761 0.2823 0.28939 0.29768 0.30693 0.31737 0.32891 0.34138 0.35485 0.36894 0.38383 0.39882 0.41403 0.4289 0.44319 0.45698 0.4697 0.48173 0.4927 0.50277 0.51181 0.51982 0.52694 0.53284 0.53773 0.54144 0.544 0.54534 0.5456 0.54482 0.54307 0.54054 0.53739 0.53373 0.52971 0.52551 0.52112 0.51672 0.51222 0.50774 0.50329 0.49892 0.49459 0.49029 0.48607 0.48182 0.47767 0.4735 0.46941 0.46534 0.46127 0.4573 0.4533 0.44946 0.44567 0.44205 0.4386 0.43531 0.43226 0.42943 0.42694 0.42472 0.42288 0.42137 0.42025 0.41957 0.41924 0.41932 0.41986 0.42081 0.42219 0.42396 0.42619 0.42878 0.43171 0.43501 0.43854 0.44239 0.44637 0.45054 0.4548 0.45916 0.46358 0.46798 0.47243 0.47678 0.48113 0.4853 0.48938 0.49325 0.49693 0.50046 0.50379 0.50698 0.50997 0.51284 0.51555 0.51814 0.52058 0.52286 0.52503 0.52703 0.52894 0.53069 0.53229 0.53375 0.53508 0.53631 0.53736 0.53825 0.53903 0.53964 0.54011 0.54042 0.54056 0.54053 0.54034 0.53998 0.53944 0.53875 0.53791 0.53689 0.53563 0.53425 0.53264 0.53089 0.52894 0.527 0.52495 0.52293 0.5209 0.51885 0.51674 0.51459 0.51239 0.51008 0.5077 0.50523 0.50279 0.50029 0.49784 0.49534 0.49288 0.49041 0.48794 0.4855 0.48298 0.48049 0.47794 0.47544 0.47289 0.47037 0.46785 0.46541 0.46298 0.46062 0.45831 0.45604 0.45386 0.4517 0.44958 0.44748 0.44547 0.4434 0.44145 0.43953 0.43772 0.43598 0.43438 0.43285 0.43149 0.43036 0.42943 0.42879 0.42843 0.42848 0.42893 0.42981 0.43119 0.43305 0.43547 0.43841 0.44189 0.44588 0.45042 0.45542 0.46091 0.46668 0.4728 0.47908 0.48546 0.49184 0.4982 0.50443 0.51068 0.5169 0.52313 0.52947 0.53585 0.54213 0.54794 0.55308 0.55709 0.55976 0.56117 0.56154 0.56128 0.56087 0.56073 0.56115 0.56224 0.56397 0.56623 0.56873 0.57113 0.5732 0.57471 0.57564 0.57603 0.57615 0.57598 0.57565 0.57517 0.5746 0.57385 0.57296 0.57199 0.57096 0.57006 0.56925 0.56861 0.56806 0.56752 0.56686 0.56598 0.56481 0.56338 0.56186 0.56045 0.5593 0.55848 0.55801 0.55778 0.55774 0.55773 0.55773 0.5577 0.55765 0.55752 0.55727 0.55695 0.55668 0.55649 0.55645 0.55656 0.55689 0.55749 0.55837 0.55956 0.56113 0.56309 0.56538 0.56799 0.57095 0.57413 0.57749 0.58087 0.58452 0.58805 0.59171 0.59535 0.59901 0.60267 0.60633 0.60999 0.61371 0.61755 0.62143 0.62544 0.62969 0.63396 0.63834 0.64268 0.64708 0.65134 0.65545 0.65941 0.66323 0.66692 0.67065 0.67416 0.67771 0.68117 0.68451 0.68775 0.69084 0.69389 0.69663 0.69924 0.70165 0.70373 0.70556 0.70718 0.70846 0.70939 0.71009 0.71047 0.71043 0.71032 0.70993 0.70927
-0.010514 -0.010679 -0.010826 -0.01094 -0.01102 -0.01107 -0.011034 -0.01095 -0.01077 -0.010492 -0.01006 -0.0095057 -0.0087295 -0.0077278 -0.0064635 -0.0049181 -0.0030912 -0.0009854 0.0014546 0.0041158 0.0070309 0.010184 0.013515 0.017013 0.020586 0.024197 0.027902 0.031523 0.035073 0.038583 0.041953 0.045192 0.048315 0.051268 0.054145 0.056879 0.059556 0.062209 0.064794 0.067367 0.069926 0.072429 0.074911 0.077223 0.079421 0.081442 0.083242 0.084751 0.086002 0.086949 0.087626 0.087958 0.08801 0.087729 0.087166 0.086272 0.085105 0.083662 0.081983 0.080152 0.078206 0.076135 0.074085 0.072046 0.070069 0.068188 0.066376 0.064722 0.063195 0.061801 0.060554 0.059449 0.05846 0.05761 0.056854 0.056211 0.055638 0.055128 0.054673 0.054275 0.053886 0.053521 0.053163 0.05281 0.052448 0.052056 0.051654 0.051212 0.050738 0.050242 0.049709 0.049173 0.048641 0.048107 0.047606 0.047149 0.046727 0.046384 0.046108 0.045928 0.045833 0.045848 0.045959 0.046202 0.046565 0.047071 0.047728 0.048526 0.04948 0.050627 0.051938 0.053437 0.055129 0.056985 0.059086 0.061321 0.063771 0.066392 0.06915 0.072102 0.075135 0.07826 0.081534 0.084814 0.088158 0.091519 0.094851 0.098224 0.10146 0.1046 0.10767 0.11059 0.11341 0.11609 0.11864 0.12119 0.12364 0.1261 0.1286 0.13123 0.13407 0.13716 0.14057 0.14445 0.14867 0.15348 0.15876 0.16452 0.17096 0.17781 0.18525 0.19326 0.20173 0.21079 0.22011 0.22967 0.23966 0.24957 0.25955 0.26937 0.27891 0.28832 0.29717 0.30552 0.31338 0.3205 0.32714 0.33291 0.33805 0.34261 0.34653 0.34991 0.35277 0.35519 0.35727 0.35899 0.3604 0.36162 0.3626 0.36342 0.36406 0.36456 0.36491 0.36507 0.3651 0.36492 0.3646 0.3641 0.36349 0.36275 0.36192 0.361 0.35999 0.35894 0.35781 0.35664 0.35539 0.35402 0.35268 0.3513 0.34988 0.34849 0.34699 0.34552 0.34404 0.34254 0.34108 0.33964 0.33823 0.33687 0.33554 0.33429 0.33311 0.332 0.3309 0.32995 0.3291 0.32837 0.32768 0.32706 0.32649 0.32598 0.32554 0.3251 0.32471 0.32433 0.32399 0.32367 0.32336 0.32304 0.32273 0.3224 0.32204 0.32164 0.32119 0.32067 0.32007 0.31939 0.31859 0.3177 0.3167 0.31557 0.31435 0.31298 0.3115 0.30987 0.30813 0.30629 0.3043 0.30227 0.30012 0.29793 0.2957 0.29341 0.29112 0.28883 0.28652 0.28426 0.28197 0.27973 0.27751 0.27534 0.27321 0.27108 0.26902 0.267 0.26502 0.2631 0.2612 0.25938 0.25761 0.25589 0.25427 0.25268 0.2512 0.24983 0.24855 0.2474 0.24636 0.24547 0.24471 0.24407 0.24356 0.24321 0.24303 0.24309 0.24343 0.24408 0.24514 0.24655 0.24842 0.2507 0.25335 0.25643 0.25971 0.26316 0.26656 0.26979 0.27281 0.27543 0.27771 0.27948 0.28087 0.2819 0.28259 0.28312 0.2835 0.28386 0.28422 0.2846 0.28503 0.28545 0.28589 0.28629 0.28663 0.28694 0.28719 0.28748 0.28787 0.28836 0.28906 0.2899 0.29084 0.2918 0.29272 0.29357 0.29428 0.29488 0.29535 0.29576 0.2961 0.29636 0.29657 0.29675 0.2969 0.29703 0.29712 0.29713 0.29698 0.29664 0.29609 0.2953 0.29429 0.29311 0.29174 0.29025 0.28865 0.28698 0.28528 0.28355 0.28185 0.28019 0.27862 0.27712 0.27571 0.27442 0.27322 0.27209 0.27102 0.26996 0.26888 0.26772 0.26651 0.26522 0.26385 0.26244 0.26096 0.25951 0.25792 0.25632 0.25473 0.25318 0.25176 0.2505 0.24946 0.24867 0.24821 0.24804 0.24816 0.24865 0.24946 0.25063 0.2522 0.25422 0.25667 0.25972 0.26327 0.26743 0.2722 0.27769 0.28404 0.29128 0.29974 0.30918 0.31985 0.3316 0.34434 0.35809 0.37245 0.38765 0.40295 0.41848 0.43367 0.4483 0.46239 0.47539 0.48774 0.499 0.50933 0.51865 0.52691 0.53425 0.54036 0.54544 0.54932 0.55198 0.55341 0.55369 0.55297 0.55117 0.54859 0.54539 0.54161 0.53752 0.53321 0.52872 0.52422 0.51962 0.51507 0.5105 0.50601 0.50158 0.49716 0.49282 0.48851 0.48424 0.47996 0.47575 0.47157 0.46741 0.46333 0.45924 0.45529 0.45139 0.44766 0.4441 0.44072 0.4376 0.43467 0.43212 0.42984 0.42791 0.42637 0.42525 0.42452 0.4242 0.42429 0.42484 0.42578 0.42718 0.429 0.43127 0.43392 0.43693 0.44029 0.44388 0.44783 0.45193 0.45619 0.46055 0.46501 0.46952 0.47404 0.47864 0.48308 0.48755 0.49183 0.49601 0.49999 0.50378 0.50738 0.5108 0.51411 0.51719 0.52015 0.52294 0.5256 0.52813 0.53048 0.53272 0.53482 0.53679 0.53861 0.54028 0.54178 0.54317 0.5444 0.54553 0.54646 0.54727 0.54791 0.54842 0.54874 0.54887 0.54886 0.54866 0.54829 0.54778 0.54709 0.5462 0.54516 0.54389 0.54248 0.54083 0.53903 0.53706 0.53504 0.53297 0.53089 0.5288 0.52669 0.52456 0.52235 0.5201 0.51773 0.51533 0.5128 0.5103 0.50773 0.50522 0.50265 0.50014 0.49761 0.49505 0.49253 0.48993 0.48737 0.48472 0.48212 0.47946 0.47689 0.4743 0.47179 0.46928 0.46683 0.46448 0.46216 0.45991 0.45767 0.4555 0.45335 0.45124 0.44914 0.44712 0.44512 0.44322 0.44141 0.4397 0.43811 0.4367 0.43547 0.43444 0.4337 0.43331 0.43327 0.43364 0.43447 0.43579 0.43759 0.44 0.4429 0.44642 0.45043 0.45505 0.46011 0.46568 0.47163 0.478 0.48445 0.49108 0.49763 0.50422 0.51072 0.51719 0.52363 0.53009 0.53672 0.54332 0.54987 0.55595 0.56129 0.56547 0.56827 0.56972 0.57006 0.56968 0.56914 0.56888 0.56923 0.57027 0.57202 0.57428 0.57681 0.57929 0.58142 0.58299 0.584 0.58445 0.58457 0.58442 0.5841 0.58366 0.583 0.58221 0.58126 0.58024 0.57916 0.57817 0.57727 0.57657 0.57594 0.57538 0.57472 0.57376 0.57253 0.57105 0.56951 0.56808 0.56695 0.56615 0.56569 0.56547 0.56542 0.56547 0.56551 0.56549 0.56545 0.56534 0.56509 0.56482 0.56452 0.56429 0.56426 0.56439 0.56474 0.56539 0.56632 0.5676 0.56929 0.57127 0.57373 0.57645 0.57954 0.58285 0.58632 0.58989 0.59368 0.5974 0.60121 0.60499 0.60878 0.61253 0.61633 0.62012 0.62396 0.62776 0.63191 0.63607 0.64046 0.64488 0.64939 0.65386 0.65834 0.66273 0.66693 0.67097 0.67493 0.67878 0.68256 0.68618 0.68976 0.69325 0.69665 0.69995 0.70317 0.70625 0.70907 0.71174 0.71414 0.71635 0.71818 0.71978 0.721 0.72201 0.72269 0.7231 0.72314 0.72299 0.72256 0.72191
-0.022683 -0.022774 -0.022835 -0.022861 -0.022858 -0.02281 -0.022686 -0.022506 -0.022206 -0.021822 -0.021259 -0.020561 -0.019627 -0.018465 -0.017036 -0.0153 -0.01329 -0.011002 -0.0083723 -0.0055546 -0.0025034 0.0007617 0.0041927 0.0077667 0.011388 0.015035 0.018755 0.022392 0.02595 0.029456 0.032821 0.036042 0.039127 0.04203 0.044847 0.047513 0.050112 0.05268 0.055184 0.057686 0.060161 0.062588 0.064987 0.06722 0.069337 0.07127 0.072988 0.074422 0.075618 0.07652 0.077175 0.077506 0.07758 0.077337 0.076829 0.076002 0.074908 0.073538 0.071928 0.07015 0.068265 0.066261 0.064264 0.062288 0.060368 0.058553 0.056811 0.055224 0.053765 0.05243 0.051238 0.050182 0.049239 0.048429 0.047705 0.047092 0.046553 0.046069 0.045649 0.045285 0.044928 0.044604 0.04429 0.043983 0.04367 0.04333 0.042979 0.04259 0.042172 0.041722 0.041244 0.040752 0.040265 0.039768 0.039309 0.038888 0.038505 0.038187 0.037938 0.037778 0.037703 0.037727 0.037839 0.038078 0.038431 0.038919 0.039546 0.04031 0.041213 0.042297 0.043529 0.04494 0.046528 0.048268 0.050245 0.05234 0.054635 0.057088 0.059678 0.062442 0.065285 0.068217 0.071293 0.074385 0.077531 0.080699 0.083839 0.087029 0.090076 0.093053 0.095953 0.098708 0.10136 0.10388 0.10629 0.1087 0.11101 0.11332 0.11569 0.11814 0.12081 0.12369 0.12687 0.13052 0.13448 0.13892 0.14374 0.14899 0.1549 0.16117 0.16798 0.17533 0.18309 0.1914 0.19995 0.20873 0.2179 0.22698 0.23613 0.24514 0.2539 0.26253 0.27066 0.27835 0.28562 0.29222 0.29838 0.30375 0.30852 0.31273 0.31631 0.31938 0.32196 0.32415 0.32602 0.32758 0.32888 0.33 0.33091 0.33169 0.33232 0.33281 0.33316 0.33336 0.33341 0.3333 0.33304 0.33265 0.33212 0.33149 0.33077 0.32999 0.32912 0.3282 0.32724 0.3262 0.32513 0.324 0.32281 0.32156 0.32027 0.31903 0.31769 0.31636 0.31503 0.31367 0.31234 0.31103 0.30975 0.30851 0.30728 0.30612 0.30508 0.30406 0.30305 0.30216 0.30135 0.30063 0.29997 0.29936 0.2988 0.2983 0.29785 0.29743 0.29704 0.29666 0.29632 0.296 0.29569 0.29539 0.29508 0.29477 0.29445 0.2941 0.29367 0.29319 0.29264 0.29201 0.29127 0.29044 0.28951 0.28847 0.28733 0.28604 0.28467 0.28315 0.28154 0.27984 0.27799 0.2761 0.27411 0.27208 0.27002 0.2679 0.26579 0.26367 0.26156 0.25947 0.25736 0.25529 0.25326 0.25126 0.24931 0.24735 0.24546 0.24359 0.24177 0.24002 0.23827 0.2366 0.23498 0.23342 0.23193 0.23048 0.22914 0.2279 0.22676 0.22573 0.22482 0.22406 0.22341 0.2229 0.2225 0.22224 0.22215 0.22229 0.2227 0.22339 0.22447 0.22589 0.22773 0.22995 0.23252 0.23549 0.23862 0.2419 0.2451 0.24817 0.25103 0.25355 0.25577 0.25755 0.25898 0.26007 0.26086 0.26146 0.26193 0.26235 0.26276 0.26318 0.26362 0.26405 0.26443 0.26476 0.265 0.26516 0.26525 0.26534 0.26552 0.26582 0.2663 0.26694 0.2677 0.2685 0.26932 0.27006 0.27069 0.27124 0.27167 0.27202 0.27231 0.27249 0.27259 0.27266 0.27268 0.27267 0.27264 0.27252 0.27228 0.27188 0.27129 0.27052 0.26955 0.26844 0.26715 0.26576 0.26427 0.26274 0.26116 0.25957 0.258 0.25646 0.25501 0.25362 0.25232 0.25112 0.25001 0.24896 0.24796 0.24697 0.24596 0.24488 0.24375 0.24255 0.24126 0.23995 0.23858 0.23723 0.23575 0.23427 0.23278 0.23134 0.23004 0.22884 0.22788 0.22713 0.22668 0.2265 0.22661 0.22704 0.22778 0.22883 0.23025 0.23208 0.23431 0.23711 0.24036 0.24418 0.24855 0.25363 0.25948 0.26611 0.2739 0.28256 0.2924 0.30325 0.31498 0.32764 0.34085 0.35488 0.36898 0.38327 0.39724 0.41071 0.42369 0.43572 0.4471 0.45749 0.46702 0.47561 0.48327 0.49005 0.49573 0.50042 0.50402 0.5065 0.50784 0.50816 0.50748 0.50592 0.50356 0.50065 0.49727 0.49352 0.48962 0.48552 0.48143 0.47721 0.47307 0.46892 0.46484 0.46083 0.45681 0.4529 0.44899 0.44516 0.44131 0.43753 0.43375 0.42998 0.42628 0.42257 0.41899 0.41544 0.41206 0.40881 0.40572 0.40286 0.40019 0.39786 0.39579 0.39405 0.39267 0.39166 0.39103 0.39076 0.39088 0.39139 0.39229 0.3936 0.39526 0.39735 0.3998 0.40259 0.40571 0.40908 0.41275 0.41656 0.42056 0.42469 0.42891 0.43319 0.43748 0.44182 0.44606 0.45026 0.45429 0.45819 0.46188 0.4654 0.46873 0.47189 0.47491 0.47769 0.4804 0.48293 0.48536 0.48762 0.48975 0.49174 0.49361 0.49535 0.49693 0.49842 0.49968 0.5009 0.50199 0.50296 0.5038 0.50451 0.50506 0.50545 0.50571 0.50579 0.50576 0.50555 0.50518 0.5047 0.50408 0.50329 0.50232 0.50118 0.49992 0.49842 0.49682 0.49505 0.49326 0.49137 0.48949 0.48763 0.48578 0.48389 0.48196 0.47995 0.47785 0.47569 0.47345 0.47123 0.46895 0.46668 0.46441 0.46214 0.45988 0.4576 0.45532 0.45299 0.45071 0.44831 0.44595 0.44354 0.44118 0.43883 0.43651 0.43422 0.43198 0.4298 0.42767 0.42555 0.42349 0.42145 0.41942 0.41748 0.41552 0.41364 0.41179 0.41006 0.40836 0.40681 0.40535 0.40407 0.40296 0.40206 0.40144 0.4011 0.40111 0.40152 0.40236 0.40364 0.40541 0.40771 0.4105 0.41382 0.41765 0.42208 0.42686 0.43212 0.43766 0.44355 0.44958 0.45571 0.4618 0.4679 0.4739 0.47991 0.48589 0.49189 0.498 0.50405 0.51006 0.51556 0.52046 0.52426 0.52685 0.52821 0.52861 0.52844 0.52818 0.52815 0.52862 0.52979 0.53157 0.53381 0.53625 0.53856 0.54053 0.54188 0.54262 0.54283 0.54278 0.54244 0.54199 0.54143 0.54079 0.54002 0.53916 0.53822 0.53731 0.5365 0.53581 0.53528 0.53491 0.53456 0.53407 0.53327 0.53214 0.53073 0.52917 0.52769 0.52649 0.52563 0.52517 0.52494 0.52492 0.52491 0.52491 0.52486 0.52479 0.52468 0.52443 0.52412 0.52382 0.5236 0.52352 0.52367 0.52392 0.52452 0.52533 0.52647 0.52796 0.5298 0.53196 0.53439 0.53719 0.54024 0.54338 0.54669 0.55015 0.55354 0.557 0.5604 0.56384 0.56726 0.57073 0.57418 0.57773 0.58127 0.58502 0.58886 0.59284 0.59687 0.60105 0.60509 0.60911 0.61313 0.61706 0.62084 0.62451 0.62804 0.6316 0.63502 0.63839 0.64165 0.64478 0.64787 0.65082 0.65365 0.65626 0.65867 0.66093 0.6629 0.66456 0.66602 0.66724 0.66812 0.66875 0.66905 0.6691 0.66894 0.66853 0.66795
-0.02443 -0.02452 -0.024584 -0.024615 -0.024612 -0.024563 -0.024434 -0.024258 -0.02396 -0.02357 -0.02301 -0.022307 -0.021381 -0.020247 -0.01884 -0.017151 -0.015189 -0.012964 -0.010418 -0.0076801 -0.0047299 -0.0015753 0.001742 0.0051943 0.0086912 0.01222 0.015815 0.019329 0.022764 0.026163 0.02941 0.032522 0.035503 0.038301 0.041016 0.043576 0.046075 0.048544 0.050952 0.053354 0.055739 0.05808 0.060396 0.062547 0.064588 0.06647 0.068127 0.069519 0.070678 0.071559 0.072212 0.072546 0.072635 0.072422 0.071949 0.071164 0.070125 0.068806 0.067268 0.065553 0.063732 0.061792 0.059863 0.05795 0.056094 0.054331 0.052643 0.05111 0.049698 0.048409 0.047252 0.046225 0.045307 0.044523 0.043821 0.043223 0.0427 0.042226 0.041815 0.04146 0.041118 0.040799 0.040499 0.0402 0.039894 0.039568 0.039232 0.038861 0.038455 0.038028 0.037568 0.0371 0.036635 0.036161 0.035723 0.035318 0.034958 0.034658 0.034426 0.034279 0.034213 0.034244 0.03436 0.034597 0.034945 0.035419 0.036033 0.036769 0.037646 0.038695 0.039888 0.041248 0.042782 0.044469 0.046372 0.048399 0.050615 0.052987 0.055492 0.058159 0.060916 0.06375 0.066733 0.069726 0.072783 0.075852 0.0789 0.081999 0.084958 0.087854 0.090685 0.093365 0.095948 0.098408 0.10076 0.10309 0.10534 0.10758 0.10986 0.11227 0.11487 0.11767 0.12077 0.12432 0.1282 0.13253 0.13727 0.14241 0.14815 0.15427 0.16096 0.16818 0.17583 0.18402 0.19247 0.20114 0.21023 0.21924 0.22832 0.23728 0.24599 0.25461 0.26271 0.2704 0.27766 0.28427 0.29045 0.29582 0.30061 0.30483 0.30842 0.31149 0.31407 0.31625 0.31813 0.31969 0.32099 0.3221 0.32303 0.32381 0.32443 0.32492 0.32527 0.32546 0.3255 0.32538 0.32512 0.3247 0.32417 0.32352 0.3228 0.322 0.32116 0.32025 0.31928 0.3183 0.3172 0.31607 0.31489 0.31366 0.31238 0.31111 0.30973 0.30835 0.30698 0.30557 0.3042 0.30283 0.30151 0.30023 0.29899 0.29781 0.29671 0.29564 0.29458 0.29366 0.29283 0.29209 0.29139 0.29078 0.2902 0.28969 0.28922 0.2888 0.28839 0.288 0.28767 0.28733 0.28701 0.28672 0.2864 0.28609 0.28576 0.2854 0.28499 0.2845 0.28395 0.28332 0.28259 0.28178 0.28085 0.27981 0.27869 0.27742 0.27607 0.27457 0.27297 0.27128 0.26944 0.26758 0.26561 0.26359 0.26156 0.25946 0.25737 0.25527 0.25318 0.25111 0.24903 0.247 0.24499 0.24302 0.24109 0.23916 0.23729 0.23546 0.23366 0.23193 0.23021 0.22856 0.22698 0.22544 0.22399 0.22258 0.22127 0.22006 0.21895 0.21798 0.21712 0.21639 0.2158 0.21532 0.21496 0.21474 0.21468 0.21485 0.21526 0.21596 0.21704 0.21844 0.22026 0.22245 0.22499 0.2279 0.23098 0.2342 0.23736 0.24038 0.24321 0.24571 0.24791 0.24969 0.25113 0.25225 0.25304 0.25366 0.25416 0.25462 0.25505 0.2555 0.25594 0.25639 0.25677 0.25709 0.25729 0.2574 0.25744 0.25748 0.25761 0.25786 0.25831 0.2589 0.25962 0.26041 0.26119 0.26192 0.26255 0.26309 0.26352 0.26387 0.26415 0.26433 0.26444 0.26449 0.2645 0.26447 0.26442 0.26429 0.26405 0.26365 0.26306 0.2623 0.26136 0.26025 0.25899 0.25764 0.25617 0.25466 0.25312 0.25154 0.24999 0.24848 0.24704 0.24568 0.24439 0.24321 0.24211 0.24108 0.24009 0.23911 0.2381 0.23703 0.23591 0.23472 0.23346 0.23215 0.23079 0.22947 0.22802 0.22655 0.22509 0.22368 0.22239 0.22122 0.22027 0.21955 0.2191 0.21892 0.21904 0.21945 0.22018 0.22121 0.22262 0.22441 0.22662 0.22938 0.2326 0.23639 0.24074 0.24577 0.25159 0.2582 0.26597 0.27462 0.28443 0.29529 0.30706 0.3198 0.33313 0.34724 0.3615 0.37594 0.39008 0.40373 0.41688 0.42909 0.44064 0.4512 0.46087 0.46958 0.47734 0.48426 0.48996 0.49472 0.49836 0.50087 0.50223 0.50253 0.50185 0.50018 0.49781 0.49483 0.49135 0.48756 0.48356 0.47936 0.47516 0.47088 0.46664 0.4624 0.45823 0.45415 0.45007 0.44608 0.44208 0.43818 0.43426 0.43039 0.42655 0.42272 0.41894 0.41515 0.41151 0.40792 0.40448 0.40117 0.39804 0.39515 0.39244 0.39007 0.38797 0.38623 0.38479 0.38377 0.38311 0.38284 0.38294 0.38347 0.38435 0.38566 0.38734 0.38945 0.39192 0.39475 0.39791 0.40129 0.40501 0.40886 0.41294 0.41709 0.42135 0.42569 0.43001 0.43437 0.43865 0.44291 0.44696 0.45094 0.45466 0.45824 0.46162 0.46477 0.46784 0.4707 0.47344 0.47599 0.47846 0.48079 0.48292 0.48493 0.48679 0.48858 0.49021 0.49167 0.49297 0.49418 0.49528 0.49626 0.49709 0.49784 0.49839 0.49879 0.49903 0.49914 0.49907 0.49886 0.4985 0.49803 0.49737 0.49655 0.49559 0.49446 0.49316 0.49166 0.49004 0.48823 0.48641 0.4845 0.48264 0.48074 0.47886 0.47698 0.47497 0.47291 0.4708 0.4686 0.46632 0.46405 0.46173 0.45943 0.45713 0.45483 0.45254 0.45024 0.44794 0.44558 0.44322 0.44081 0.43845 0.436 0.43362 0.43123 0.42892 0.42659 0.42434 0.42211 0.41996 0.41785 0.41575 0.4137 0.41167 0.40971 0.40774 0.40588 0.40402 0.4023 0.4006 0.39904 0.39759 0.3963 0.39519 0.39433 0.39371 0.39343 0.39349 0.39394 0.39486 0.39622 0.39808 0.40043 0.40333 0.40676 0.41067 0.41513 0.41999 0.42531 0.43095 0.43688 0.44293 0.4491 0.45521 0.46131 0.46736 0.47337 0.47936 0.48539 0.49149 0.49756 0.50354 0.50909 0.51397 0.51776 0.52033 0.52165 0.52205 0.52184 0.52157 0.52152 0.52203 0.52319 0.525 0.52724 0.52973 0.53209 0.53408 0.53547 0.53626 0.53656 0.5365 0.53626 0.53585 0.53533 0.53472 0.53397 0.53308 0.53214 0.5312 0.53038 0.52968 0.52917 0.52876 0.52837 0.52784 0.52702 0.5259 0.52445 0.52288 0.52138 0.52019 0.51934 0.51887 0.51859 0.51848 0.5185 0.51848 0.51842 0.51832 0.5182 0.51794 0.51761 0.51731 0.51713 0.51707 0.51713 0.51743 0.51795 0.51877 0.51991 0.52138 0.52317 0.52536 0.52783 0.53065 0.5337 0.5369 0.54024 0.54368 0.54712 0.55063 0.55417 0.55766 0.56112 0.56463 0.56818 0.57178 0.5754 0.57922 0.58311 0.58717 0.59134 0.59558 0.59973 0.60391 0.608 0.61204 0.61589 0.61968 0.62334 0.62698 0.63053 0.63397 0.63731 0.64052 0.64366 0.64672 0.6496 0.65239 0.65492 0.65712 0.6592 0.661 0.66244 0.66365 0.66458 0.66527 0.6656 0.66565 0.66553 0.66514 0.66451
-0.027838 -0.027913 -0.027967 -0.027978 -0.027972 -0.027915 -0.027777 -0.027607 -0.027295 -0.026913 -0.026354 -0.025654 -0.024736 -0.023595 -0.02219 -0.020512 -0.018555 -0.01632 -0.01377 -0.01103 -0.0080594 -0.0048764 -0.0015393 0.0019447 0.0054778 0.0090386 0.012662 0.016212 0.019679 0.023097 0.026372 0.029512 0.032519 0.035356 0.038109 0.040711 0.043256 0.045764 0.048209 0.050644 0.053063 0.055439 0.057792 0.059978 0.062054 0.063961 0.065655 0.067074 0.068262 0.069166 0.069829 0.070173 0.070254 0.070042 0.06956 0.06877 0.067725 0.066398 0.064841 0.063121 0.06129 0.059345 0.057411 0.055487 0.053627 0.05186 0.050164 0.048624 0.047204 0.045912 0.044756 0.043737 0.04282 0.042035 0.041337 0.040744 0.040226 0.039765 0.039359 0.039007 0.038665 0.038352 0.038052 0.037754 0.037451 0.037122 0.036788 0.036411 0.036007 0.035573 0.035123 0.034658 0.034189 0.033725 0.033289 0.032891 0.032523 0.03223 0.032 0.031859 0.03179 0.031825 0.031942 0.032187 0.032538 0.033022 0.03364 0.034388 0.035273 0.036332 0.03754 0.038921 0.04048 0.042178 0.044107 0.046155 0.048393 0.050796 0.053325 0.05602 0.058798 0.061659 0.064661 0.067671 0.070755 0.073846 0.076907 0.080023 0.083002 0.085911 0.088758 0.09146 0.09406 0.096541 0.098915 0.10128 0.10356 0.10584 0.10817 0.11061 0.11326 0.11612 0.11927 0.12289 0.12682 0.13125 0.13608 0.1413 0.14712 0.15336 0.16014 0.16745 0.1752 0.18346 0.19199 0.20074 0.20989 0.21895 0.22808 0.23706 0.24579 0.2544 0.2625 0.27016 0.27739 0.28395 0.29006 0.29539 0.30014 0.30433 0.30792 0.31101 0.31362 0.31583 0.31773 0.3193 0.32061 0.32172 0.32264 0.32342 0.32401 0.32448 0.3248 0.32498 0.32501 0.32486 0.32459 0.32414 0.32358 0.3229 0.32215 0.32133 0.32042 0.31946 0.31845 0.3174 0.31627 0.31511 0.31388 0.31263 0.31132 0.31004 0.30868 0.30732 0.30597 0.3046 0.30324 0.3019 0.3006 0.29934 0.29812 0.29701 0.29594 0.29489 0.29386 0.29298 0.29218 0.29146 0.2908 0.29021 0.28967 0.28918 0.28873 0.28831 0.28793 0.28756 0.28722 0.2869 0.28659 0.28629 0.28598 0.28567 0.28534 0.28497 0.28456 0.28407 0.2835 0.28285 0.28211 0.28129 0.28034 0.27929 0.27815 0.27686 0.27548 0.27397 0.27236 0.27064 0.26878 0.26689 0.26489 0.26285 0.26079 0.25867 0.25656 0.25445 0.25233 0.25023 0.24812 0.24607 0.24402 0.24202 0.24006 0.2381 0.2362 0.23434 0.23252 0.23075 0.229 0.22732 0.22569 0.22412 0.22263 0.22118 0.21982 0.21858 0.21742 0.21639 0.21547 0.21469 0.21403 0.21351 0.21308 0.2128 0.21268 0.21279 0.21316 0.21381 0.21484 0.2162 0.21799 0.22014 0.22265 0.22554 0.22862 0.23184 0.235 0.23804 0.24088 0.24337 0.24555 0.24729 0.24868 0.24974 0.25047 0.25104 0.25149 0.2519 0.25229 0.25269 0.25311 0.25351 0.25389 0.25422 0.25446 0.25461 0.25473 0.25485 0.25507 0.25542 0.25594 0.2566 0.25739 0.25822 0.25905 0.25982 0.26046 0.26102 0.26146 0.26182 0.2621 0.26231 0.26244 0.26255 0.26262 0.26267 0.26267 0.26259 0.26239 0.26202 0.26145 0.2607 0.25975 0.25863 0.25737 0.25598 0.2545 0.25296 0.2514 0.2498 0.24824 0.24671 0.24526 0.2439 0.2426 0.24141 0.24029 0.23925 0.23827 0.23728 0.23628 0.2352 0.23407 0.23287 0.23161 0.2303 0.22894 0.22761 0.22615 0.22467 0.22321 0.22178 0.22048 0.2193 0.21834 0.21761 0.21718 0.21701 0.21712 0.21755 0.2183 0.21934 0.22079 0.22262 0.22485 0.22767 0.23095 0.2348 0.23921 0.24432 0.2502 0.25691 0.26477 0.27348 0.28338 0.29434 0.30619 0.319 0.33235 0.34655 0.36083 0.37534 0.38952 0.40319 0.41639 0.42863 0.44019 0.45079 0.4605 0.46925 0.47703 0.48396 0.48973 0.49451 0.49816 0.50068 0.50199 0.50224 0.5015 0.49981 0.49731 0.49425 0.49068 0.48682 0.48274 0.47849 0.47422 0.46988 0.46557 0.46127 0.45704 0.4529 0.44875 0.4447 0.44063 0.43666 0.43268 0.42874 0.42485 0.42095 0.41714 0.41332 0.40963 0.40599 0.40251 0.39918 0.39603 0.39308 0.39037 0.38797 0.38584 0.38405 0.38259 0.38155 0.38086 0.38055 0.38063 0.38111 0.382 0.38329 0.38492 0.38702 0.38946 0.39225 0.39535 0.3987 0.40236 0.40615 0.41015 0.41421 0.41837 0.42265 0.42689 0.43122 0.4354 0.4396 0.44362 0.44756 0.45133 0.45488 0.45831 0.46149 0.4646 0.46748 0.47025 0.47286 0.47537 0.47772 0.47995 0.48203 0.48397 0.48581 0.48749 0.48904 0.49044 0.49174 0.4929 0.49391 0.49479 0.49554 0.49614 0.49659 0.4969 0.49702 0.49696 0.4968 0.49647 0.49598 0.49533 0.49453 0.49357 0.49243 0.4911 0.48956 0.48788 0.48602 0.48412 0.48218 0.48022 0.47826 0.47625 0.47425 0.47219 0.47004 0.46784 0.46554 0.46317 0.46081 0.45841 0.45601 0.45362 0.45126 0.44892 0.44654 0.44417 0.44177 0.43938 0.43692 0.43449 0.43201 0.4296 0.42717 0.42484 0.42249 0.42022 0.418 0.41584 0.41371 0.41162 0.40961 0.4076 0.40565 0.40368 0.40182 0.39997 0.39821 0.39653 0.39497 0.3935 0.39218 0.39104 0.39014 0.38952 0.38919 0.38917 0.38956 0.39036 0.39164 0.39342 0.39569 0.39846 0.40179 0.40559 0.40997 0.41478 0.42006 0.42564 0.43157 0.43765 0.44387 0.45006 0.45622 0.4623 0.46837 0.47442 0.48053 0.48674 0.49294 0.49909 0.50478 0.50979 0.51367 0.51627 0.5176 0.51794 0.51762 0.5172 0.51704 0.51743 0.51851 0.52024 0.52247 0.52496 0.52734 0.52941 0.5309 0.53182 0.5322 0.53224 0.53206 0.53172 0.53117 0.53058 0.52982 0.52896 0.52798 0.527 0.52608 0.5253 0.52466 0.52414 0.52365 0.52307 0.52222 0.52105 0.51966 0.51813 0.5167 0.51559 0.5148 0.51432 0.51411 0.51407 0.51409 0.51412 0.5141 0.51404 0.51392 0.51366 0.51337 0.51308 0.51291 0.51284 0.51296 0.51326 0.51388 0.51474 0.51596 0.5175 0.51939 0.52166 0.52427 0.52718 0.53029 0.53358 0.53703 0.54054 0.54414 0.54771 0.55134 0.55495 0.5585 0.56215 0.5657 0.56939 0.5731 0.57703 0.581 0.58511 0.58929 0.59362 0.59793 0.60211 0.60624 0.61025 0.61414 0.61795 0.62158 0.62522 0.6288 0.63226 0.63561 0.63894 0.64208 0.64514 0.64811 0.65088 0.65345 0.65568 0.65777 0.6595 0.66106 0.66226 0.66328 0.66389 0.66428 0.66433 0.66419 0.66376 0.66317
-0.020615 -0.020707 -0.020769 -0.020797 -0.020782 -0.020725 -0.020599 -0.02042 -0.02011 -0.019711 -0.019137 -0.018432 -0.017479 -0.016317 -0.014862 -0.013116 -0.011083 -0.0087729 -0.0061201 -0.0032577 -0.0001619 0.0031532 0.0066309 0.010267 0.013945 0.017647 0.021416 0.025094 0.028689 0.032238 0.035632 0.038893 0.042021 0.044975 0.047858 0.050591 0.053263 0.055891 0.058458 0.061001 0.063522 0.065999 0.068438 0.070701 0.072852 0.074819 0.076566 0.078037 0.079252 0.080167 0.080828 0.081148 0.081201 0.08094 0.08041 0.079561 0.078462 0.077088 0.075489 0.07374 0.07188 0.069917 0.067955 0.066013 0.064124 0.06233 0.060604 0.059037 0.057584 0.05626 0.05508 0.054033 0.053099 0.052301 0.051588 0.050989 0.050457 0.049987 0.049574 0.049222 0.048873 0.048548 0.048235 0.047923 0.047602 0.04726 0.046901 0.046505 0.04608 0.045627 0.045146 0.044651 0.044166 0.043663 0.043204 0.042782 0.042401 0.042092 0.041843 0.041689 0.041617 0.041652 0.041773 0.042031 0.042402 0.042906 0.043553 0.044344 0.045278 0.0464 0.047672 0.049133 0.050772 0.052572 0.054604 0.056765 0.059131 0.061663 0.064333 0.067175 0.070103 0.073121 0.07628 0.07946 0.082691 0.08594 0.089154 0.092418 0.095538 0.09858 0.10155 0.10437 0.10707 0.10966 0.11212 0.11458 0.11694 0.1193 0.12172 0.12423 0.12696 0.12992 0.13318 0.13693 0.14103 0.14558 0.15061 0.15613 0.1623 0.16884 0.17597 0.18362 0.19174 0.2004 0.20931 0.21845 0.228 0.23747 0.24702 0.25642 0.26554 0.27455 0.28301 0.29101 0.29854 0.30536 0.31172 0.31725 0.32218 0.32652 0.33023 0.33342 0.3361 0.33837 0.34031 0.34193 0.34327 0.34441 0.34534 0.34611 0.34672 0.34718 0.3475 0.34765 0.34767 0.34751 0.34721 0.34673 0.34614 0.34543 0.34463 0.34374 0.34278 0.34174 0.34064 0.33952 0.33831 0.33707 0.33574 0.33439 0.33304 0.33171 0.3303 0.32889 0.3275 0.3261 0.32473 0.32335 0.32203 0.32075 0.31949 0.31831 0.31719 0.31612 0.31511 0.31424 0.31342 0.31269 0.31201 0.31142 0.31088 0.31037 0.30991 0.30949 0.30911 0.30873 0.30839 0.30806 0.30773 0.30742 0.30712 0.30679 0.30644 0.30605 0.30561 0.3051 0.30452 0.30387 0.30309 0.30223 0.30126 0.30017 0.29898 0.29764 0.29621 0.29463 0.29294 0.29116 0.28924 0.28727 0.28519 0.28306 0.28092 0.27871 0.27651 0.2743 0.27209 0.26991 0.26771 0.26556 0.26344 0.26135 0.25931 0.25727 0.25529 0.25335 0.25144 0.24959 0.24776 0.24602 0.24432 0.24267 0.2411 0.23957 0.23815 0.23683 0.2356 0.2345 0.23351 0.23265 0.23193 0.23133 0.23087 0.23056 0.23041 0.23051 0.23088 0.23154 0.23259 0.23399 0.23581 0.23803 0.24059 0.24356 0.2467 0.25 0.25323 0.2563 0.25916 0.26164 0.26377 0.26543 0.26671 0.26767 0.26831 0.26878 0.26916 0.26951 0.26986 0.27024 0.27066 0.27108 0.27149 0.27187 0.2722 0.27248 0.27274 0.27302 0.2734 0.27388 0.27453 0.2753 0.27618 0.27706 0.27793 0.27869 0.27932 0.27985 0.28027 0.28061 0.2809 0.28113 0.2813 0.28146 0.28161 0.28173 0.28182 0.2818 0.28165 0.28131 0.28077 0.28001 0.27904 0.27789 0.27657 0.27513 0.27358 0.27197 0.27033 0.26866 0.26702 0.26542 0.2639 0.26247 0.2611 0.25986 0.25871 0.25762 0.25659 0.25557 0.25452 0.25342 0.25225 0.251 0.24968 0.24832 0.24689 0.24549 0.24395 0.24242 0.24088 0.23939 0.23802 0.23679 0.23578 0.23501 0.23455 0.23437 0.23448 0.23493 0.23572 0.23684 0.23836 0.24029 0.24264 0.24557 0.24899 0.25302 0.25764 0.26297 0.2691 0.27605 0.28425 0.2934 0.3037 0.31508 0.3274 0.3407 0.3546 0.36927 0.38406 0.39902 0.41364 0.42773 0.44131 0.45385 0.4657 0.47654 0.48645 0.4954 0.50334 0.51039 0.51622 0.52106 0.52475 0.52731 0.52861 0.52885 0.52807 0.52631 0.52377 0.52062 0.517 0.51304 0.50886 0.50452 0.50018 0.49574 0.49135 0.48698 0.48267 0.47841 0.47418 0.47005 0.46589 0.46181 0.45774 0.45372 0.44972 0.4457 0.44182 0.4379 0.43411 0.43038 0.42681 0.4234 0.42016 0.41714 0.41432 0.41187 0.40969 0.40787 0.4064 0.40535 0.40468 0.40439 0.4045 0.40506 0.40603 0.4074 0.40916 0.41137 0.41395 0.41686 0.42011 0.42362 0.42745 0.4314 0.43557 0.43984 0.44417 0.44861 0.45304 0.45749 0.46185 0.46618 0.47034 0.47442 0.4783 0.48196 0.4855 0.4888 0.49199 0.49495 0.49784 0.50052 0.50311 0.50551 0.50778 0.50993 0.51192 0.51382 0.51552 0.51714 0.51857 0.51991 0.52109 0.52215 0.52306 0.52385 0.52447 0.52494 0.52528 0.52539 0.52537 0.52518 0.52485 0.52436 0.52368 0.52289 0.5219 0.52071 0.51936 0.5178 0.51609 0.5142 0.51229 0.5103 0.50829 0.50627 0.50429 0.50228 0.50015 0.49799 0.49573 0.49342 0.49104 0.48867 0.48623 0.48381 0.48138 0.47898 0.47655 0.47411 0.47169 0.46923 0.46679 0.46426 0.46176 0.4592 0.45674 0.45427 0.45188 0.44949 0.44714 0.44489 0.44266 0.44051 0.43837 0.43628 0.4342 0.43218 0.43014 0.42823 0.42631 0.42446 0.42268 0.42105 0.41951 0.41816 0.41695 0.41599 0.41528 0.41495 0.41492 0.41529 0.41613 0.4174 0.41922 0.42155 0.42441 0.42784 0.43177 0.43629 0.44126 0.44672 0.45247 0.45858 0.46483 0.47118 0.47755 0.48384 0.49007 0.4963 0.50245 0.50868 0.51504 0.52132 0.5276 0.53345 0.53858 0.54255 0.54519 0.54651 0.54679 0.54644 0.54592 0.54569 0.54601 0.54697 0.54866 0.55082 0.55329 0.55565 0.55774 0.55932 0.56034 0.56083 0.56097 0.56089 0.5606 0.56015 0.55952 0.55877 0.55788 0.55685 0.55578 0.55482 0.554 0.55326 0.55265 0.5521 0.55139 0.55047 0.5493 0.54787 0.54638 0.54501 0.54392 0.54318 0.54271 0.54252 0.54248 0.54248 0.54254 0.54251 0.54243 0.54229 0.54203 0.54174 0.54142 0.54123 0.54113 0.54121 0.54157 0.5422 0.54303 0.54428 0.54591 0.54786 0.55021 0.55294 0.55592 0.55908 0.56253 0.56602 0.56968 0.57332 0.57702 0.58069 0.58442 0.58807 0.59175 0.59537 0.59913 0.60298 0.60695 0.61101 0.61527 0.61945 0.6239 0.6282 0.63256 0.63674 0.64086 0.64483 0.64871 0.65238 0.65598 0.6596 0.6631 0.66652 0.66988 0.67316 0.67619 0.67921 0.68196 0.68453 0.68681 0.68895 0.69068 0.69221 0.69348 0.69445 0.69521 0.69561 0.69571 0.6955 0.69508 0.69452
-0.020206 -0.020283 -0.020331 -0.020352 -0.020337 -0.020282 -0.020147 -0.019954 -0.019647 -0.019263 -0.018682 -0.017966 -0.017019 -0.015854 -0.0144 -0.012651 -0.010628 -0.0083127 -0.0056567 -0.0028035 0.0002955 0.0036133 0.007106 0.010757 0.014457 0.018184 0.021983 0.025696 0.02932 0.032899 0.036329 0.039611 0.042761 0.04573 0.048615 0.051338 0.054007 0.056636 0.0592 0.061756 0.064283 0.066775 0.069232 0.071521 0.07369 0.075685 0.077453 0.078939 0.080178 0.081116 0.081802 0.082151 0.082234 0.081997 0.081485 0.080644 0.079545 0.078167 0.076546 0.074767 0.072873 0.070863 0.068867 0.066883 0.064956 0.063122 0.061364 0.059765 0.058291 0.05694 0.055728 0.054664 0.053708 0.05289 0.052163 0.051549 0.051007 0.050526 0.050098 0.049729 0.049371 0.049036 0.048716 0.048395 0.048075 0.047724 0.047363 0.046957 0.046527 0.046071 0.045591 0.045096 0.044602 0.0441 0.043636 0.043208 0.042824 0.042513 0.042262 0.04211 0.04204 0.042076 0.042197 0.042454 0.042825 0.043328 0.043984 0.044773 0.04571 0.046833 0.048106 0.049567 0.051209 0.053009 0.055046 0.057214 0.059583 0.062117 0.064788 0.067632 0.070563 0.073582 0.076749 0.079924 0.083167 0.086413 0.089631 0.092901 0.096025 0.099074 0.10205 0.10486 0.10759 0.11018 0.11266 0.11513 0.11751 0.11989 0.12233 0.12487 0.12762 0.13061 0.13389 0.13766 0.14177 0.14632 0.15136 0.15687 0.16303 0.16955 0.17665 0.1843 0.19238 0.20101 0.2099 0.21903 0.22854 0.23796 0.24747 0.25683 0.26592 0.27488 0.2833 0.29125 0.29873 0.30555 0.31189 0.3174 0.32231 0.32665 0.33036 0.33354 0.33622 0.33849 0.34046 0.34207 0.34341 0.34456 0.34549 0.34627 0.34688 0.34735 0.34766 0.34782 0.34783 0.34767 0.34736 0.3469 0.34632 0.34561 0.34481 0.34394 0.34298 0.34197 0.3409 0.33979 0.33859 0.33735 0.33601 0.33467 0.33331 0.33198 0.33057 0.32915 0.32775 0.32633 0.32495 0.32359 0.32225 0.32097 0.31972 0.31854 0.31742 0.31637 0.31535 0.31449 0.31368 0.31295 0.31228 0.31169 0.31114 0.31064 0.3102 0.30978 0.3094 0.30903 0.3087 0.30838 0.30807 0.30777 0.30746 0.30714 0.3068 0.30641 0.30597 0.30546 0.30489 0.30424 0.30347 0.30262 0.30165 0.30056 0.29938 0.29806 0.29663 0.29507 0.2934 0.29164 0.28973 0.28778 0.28572 0.28361 0.28149 0.2793 0.27712 0.27492 0.27274 0.27057 0.26839 0.26624 0.26413 0.26205 0.26002 0.25799 0.25604 0.2541 0.25221 0.25038 0.24857 0.24683 0.24514 0.24351 0.24196 0.24046 0.23905 0.23775 0.23654 0.23547 0.2345 0.23367 0.23298 0.23241 0.23196 0.23165 0.23152 0.23163 0.232 0.23265 0.2337 0.23509 0.23691 0.23911 0.24167 0.24465 0.24779 0.25109 0.25434 0.25744 0.26034 0.26288 0.26509 0.26683 0.2682 0.26922 0.26994 0.27047 0.27088 0.27125 0.27161 0.272 0.27241 0.27283 0.27322 0.27357 0.27385 0.27408 0.27426 0.27448 0.27478 0.27521 0.27581 0.27655 0.27741 0.2783 0.27917 0.27996 0.28062 0.28118 0.28163 0.282 0.28231 0.28253 0.2827 0.28283 0.28295 0.28305 0.28311 0.28306 0.28289 0.28255 0.28199 0.28124 0.28028 0.27913 0.27781 0.27639 0.27485 0.27326 0.27163 0.26998 0.26835 0.26677 0.26526 0.26382 0.26247 0.26124 0.26009 0.25901 0.25798 0.25695 0.25591 0.25479 0.25363 0.25239 0.25108 0.24971 0.24829 0.2469 0.24536 0.24382 0.24229 0.24081 0.23946 0.23823 0.23723 0.23647 0.23601 0.23583 0.23595 0.2364 0.23717 0.23828 0.2398 0.24171 0.24403 0.24694 0.25034 0.25433 0.25893 0.26421 0.27031 0.2772 0.28536 0.29444 0.30467 0.316 0.32823 0.34146 0.35529 0.36989 0.38464 0.39955 0.41417 0.42823 0.44183 0.45439 0.46624 0.47712 0.4871 0.49608 0.50407 0.51117 0.51707 0.52196 0.5257 0.52827 0.52964 0.5299 0.52916 0.52741 0.52487 0.52174 0.51808 0.5141 0.50991 0.50555 0.50116 0.4967 0.49227 0.48786 0.48352 0.47921 0.47493 0.47076 0.46657 0.46245 0.45835 0.45428 0.45027 0.44625 0.44232 0.43839 0.43459 0.43086 0.42728 0.42385 0.42061 0.41758 0.41477 0.41234 0.41014 0.4083 0.40685 0.40577 0.40508 0.4048 0.4049 0.40543 0.40637 0.40773 0.40948 0.41165 0.41421 0.4171 0.42032 0.42379 0.42759 0.43153 0.43566 0.43986 0.4442 0.4486 0.45296 0.45737 0.4617 0.46603 0.47018 0.47423 0.47807 0.48174 0.48524 0.48857 0.49177 0.49475 0.49762 0.5003 0.50289 0.50533 0.5076 0.50976 0.51178 0.51367 0.51543 0.51704 0.51848 0.5198 0.52099 0.52207 0.52298 0.52375 0.52437 0.52483 0.52516 0.52526 0.52526 0.52506 0.52472 0.52418 0.52353 0.52269 0.52166 0.52046 0.51909 0.51746 0.51574 0.51383 0.5119 0.50985 0.50781 0.50578 0.50375 0.50168 0.49954 0.49733 0.49505 0.49273 0.49029 0.48787 0.48539 0.48295 0.48049 0.47803 0.4756 0.47314 0.4707 0.46824 0.46577 0.46324 0.46071 0.45817 0.45569 0.4532 0.45076 0.44837 0.44604 0.44377 0.44154 0.43938 0.43722 0.43516 0.43307 0.43105 0.42904 0.42713 0.42521 0.42341 0.42166 0.42002 0.4185 0.41717 0.41597 0.41504 0.41436 0.41397 0.41398 0.41437 0.4152 0.4165 0.4183 0.42063 0.42348 0.42691 0.43079 0.43531 0.44024 0.44568 0.45143 0.45751 0.46378 0.47018 0.47652 0.48286 0.4891 0.49534 0.50155 0.50778 0.51417 0.52046 0.5268 0.53264 0.53786 0.54186 0.5446 0.54595 0.54628 0.54593 0.54548 0.54531 0.54565 0.54668 0.54841 0.55061 0.55312 0.55553 0.5576 0.55915 0.5601 0.56057 0.5606 0.5605 0.56012 0.55968 0.55908 0.55826 0.55738 0.55634 0.55531 0.55436 0.55353 0.55282 0.55225 0.55172 0.55106 0.55017 0.549 0.54753 0.54602 0.5446 0.54344 0.54268 0.54225 0.54204 0.542 0.54204 0.54209 0.54205 0.54197 0.54187 0.54159 0.54134 0.54106 0.54085 0.54076 0.54085 0.54121 0.54184 0.54273 0.54397 0.54556 0.54753 0.54993 0.55263 0.55555 0.55881 0.56219 0.56573 0.56942 0.57302 0.57677 0.58043 0.58414 0.58782 0.59155 0.59521 0.599 0.60284 0.60685 0.61094 0.61514 0.61936 0.62378 0.62812 0.63252 0.63684 0.64096 0.64493 0.64883 0.65261 0.65623 0.65985 0.66334 0.66678 0.67014 0.6734 0.67652 0.67954 0.68226 0.68496 0.68729 0.68941 0.69123 0.69277 0.69402 0.69505 0.69569 0.69607 0.69616 0.69598 0.6956 0.69495
-0.021864 -0.02195 -0.022009 -0.02203 -0.022024 -0.021969 -0.021832 -0.021636 -0.021321 -0.02091 -0.02032 -0.019601 -0.01863 -0.017431 -0.015946 -0.014164 -0.012082 -0.0097118 -0.0069964 -0.0040695 -0.0008903 0.0025182 0.0060991 0.0098399 0.013643 0.017471 0.021379 0.025206 0.028939 0.032629 0.036162 0.039561 0.04281 0.045873 0.048851 0.051667 0.054411 0.057124 0.059775 0.062405 0.065017 0.067593 0.070133 0.072501 0.074742 0.076805 0.078637 0.080175 0.081455 0.082434 0.08315 0.083512 0.08361 0.083369 0.082846 0.081984 0.080852 0.079421 0.077743 0.075894 0.073925 0.071828 0.069743 0.067681 0.065672 0.063767 0.06194 0.060272 0.058739 0.057338 0.05609 0.054984 0.053991 0.053147 0.052391 0.051753 0.051191 0.050686 0.050246 0.049867 0.049494 0.049155 0.048833 0.048507 0.048178 0.047817 0.047451 0.047042 0.046599 0.04613 0.04563 0.045119 0.044614 0.044102 0.043628 0.043189 0.042788 0.042465 0.042212 0.042053 0.041982 0.042015 0.042143 0.042405 0.042785 0.043306 0.043984 0.044791 0.045756 0.046903 0.04822 0.049724 0.051411 0.053261 0.055358 0.057585 0.060021 0.062632 0.065379 0.068313 0.071334 0.074443 0.077713 0.080992 0.084337 0.087689 0.091021 0.094399 0.097629 0.10078 0.10386 0.10678 0.10959 0.11227 0.11484 0.11739 0.11984 0.12229 0.12479 0.1274 0.13024 0.13331 0.13669 0.14057 0.14477 0.14949 0.15467 0.16033 0.16665 0.17333 0.18062 0.18846 0.19675 0.2056 0.21471 0.22406 0.2338 0.24344 0.25317 0.26272 0.272 0.28113 0.28972 0.29781 0.30546 0.31238 0.31882 0.32443 0.32943 0.33383 0.3376 0.34086 0.34359 0.34591 0.34789 0.34954 0.35091 0.35208 0.35303 0.35383 0.35446 0.35494 0.35528 0.35544 0.35546 0.3553 0.355 0.35453 0.35396 0.35325 0.35245 0.35158 0.35063 0.34961 0.34853 0.34741 0.34622 0.34496 0.34364 0.34231 0.34094 0.33962 0.33819 0.3368 0.33539 0.33397 0.33259 0.33121 0.32988 0.32859 0.32732 0.32613 0.32502 0.32394 0.32289 0.32201 0.32122 0.32049 0.31981 0.3192 0.31865 0.31816 0.31771 0.3173 0.31691 0.31654 0.31621 0.31589 0.31559 0.31527 0.31497 0.31466 0.31431 0.31393 0.31349 0.31299 0.3124 0.31174 0.31096 0.31011 0.30913 0.30804 0.30686 0.30551 0.30407 0.30249 0.30081 0.29902 0.2971 0.29511 0.29303 0.29091 0.28874 0.28651 0.2843 0.28208 0.27986 0.27766 0.27545 0.27327 0.27112 0.26901 0.26695 0.26488 0.26288 0.26092 0.25899 0.25713 0.25529 0.25352 0.2518 0.25014 0.24856 0.24703 0.2456 0.24428 0.24306 0.24196 0.241 0.24017 0.23948 0.23892 0.23847 0.23819 0.23807 0.23819 0.23858 0.23928 0.24038 0.24181 0.24371 0.24598 0.24863 0.25169 0.25493 0.25834 0.26168 0.26488 0.26787 0.27049 0.27278 0.27461 0.27605 0.27716 0.27792 0.27851 0.27897 0.27939 0.27979 0.28021 0.28064 0.28108 0.28148 0.28183 0.2821 0.28231 0.28245 0.28263 0.28289 0.28329 0.28386 0.28458 0.28542 0.28631 0.28719 0.28799 0.28867 0.28925 0.28971 0.29008 0.2904 0.2906 0.29076 0.29089 0.29098 0.29105 0.29107 0.29101 0.29082 0.29044 0.28986 0.28908 0.28809 0.28694 0.28561 0.28415 0.28261 0.28098 0.27935 0.27767 0.27602 0.27441 0.27288 0.27144 0.27006 0.2688 0.26764 0.26655 0.2655 0.26445 0.26339 0.26225 0.26106 0.2598 0.25846 0.25707 0.25562 0.2542 0.25264 0.25108 0.24952 0.24802 0.24663 0.2454 0.24437 0.2436 0.24313 0.24295 0.24308 0.24353 0.24431 0.24545 0.24697 0.24893 0.2513 0.25426 0.25772 0.26178 0.26644 0.2718 0.27798 0.28503 0.2933 0.3025 0.31289 0.32433 0.33672 0.3501 0.36405 0.37879 0.39364 0.40868 0.42337 0.43751 0.45114 0.46374 0.47566 0.48656 0.49655 0.50552 0.51348 0.52057 0.52647 0.53135 0.53509 0.53763 0.53901 0.53927 0.53853 0.5368 0.53426 0.53114 0.52751 0.52354 0.51937 0.51502 0.51064 0.50618 0.50177 0.49738 0.49302 0.48876 0.48451 0.48035 0.47617 0.47208 0.46799 0.46392 0.45993 0.45592 0.45199 0.44807 0.44426 0.44053 0.43694 0.43354 0.43029 0.42728 0.42447 0.42204 0.41985 0.41803 0.41655 0.41549 0.41481 0.41451 0.41463 0.41518 0.41613 0.41751 0.41928 0.42146 0.42404 0.42698 0.43025 0.43376 0.43757 0.44153 0.44573 0.44999 0.45436 0.45877 0.46318 0.46764 0.472 0.47635 0.48051 0.48458 0.48845 0.49212 0.49565 0.49896 0.50215 0.50512 0.50796 0.51063 0.51322 0.51565 0.51792 0.52005 0.52205 0.52394 0.52566 0.52724 0.5287 0.53004 0.53123 0.53229 0.53321 0.53399 0.53461 0.53509 0.5354 0.53554 0.53551 0.53534 0.535 0.53451 0.53384 0.53301 0.532 0.53082 0.52944 0.52785 0.52612 0.52422 0.52227 0.52027 0.51826 0.51627 0.51425 0.51222 0.51012 0.50794 0.50569 0.50338 0.50099 0.4986 0.49613 0.49371 0.49127 0.48885 0.48643 0.48399 0.48156 0.47909 0.47665 0.47414 0.47162 0.46908 0.46661 0.46412 0.46171 0.4593 0.45696 0.45468 0.45246 0.45027 0.44814 0.44603 0.44396 0.44192 0.43988 0.43793 0.43602 0.43421 0.43244 0.4308 0.42929 0.42796 0.42679 0.42588 0.42523 0.4249 0.42493 0.42539 0.4263 0.42766 0.4295 0.4319 0.43482 0.43832 0.44227 0.44687 0.45184 0.45732 0.46307 0.46924 0.47552 0.48186 0.48824 0.49452 0.5008 0.50701 0.51319 0.51939 0.52575 0.53207 0.53835 0.54416 0.54932 0.55334 0.55603 0.55739 0.55775 0.55755 0.55714 0.55699 0.55742 0.55847 0.56024 0.56248 0.56501 0.56741 0.56945 0.57095 0.57183 0.57225 0.57226 0.57212 0.57185 0.57137 0.57075 0.57001 0.56913 0.56815 0.56713 0.56624 0.56544 0.56478 0.56425 0.5638 0.56319 0.56234 0.56112 0.5597 0.55814 0.55673 0.55554 0.55475 0.55429 0.55411 0.55408 0.5541 0.55415 0.55412 0.55403 0.5539 0.55369 0.55336 0.55307 0.55283 0.55274 0.55283 0.55317 0.55376 0.55462 0.55586 0.55747 0.55938 0.56169 0.56434 0.56733 0.5705 0.5739 0.57734 0.58098 0.58458 0.58824 0.59192 0.5956 0.59919 0.60284 0.60651 0.61027 0.61406 0.61802 0.622 0.6262 0.63046 0.63488 0.63925 0.64364 0.64784 0.65199 0.65595 0.65984 0.66359 0.66731 0.67091 0.67443 0.67778 0.68108 0.68441 0.68748 0.6905 0.69331 0.69581 0.69819 0.70035 0.70219 0.7037 0.705 0.70604 0.70665 0.70703 0.70711 0.70693 0.70651 0.70581
-0.031013 -0.031099 -0.031161 -0.031188 -0.031184 -0.031156 -0.031044 -0.0309 -0.030643 -0.030317 -0.029836 -0.029237 -0.028443 -0.027461 -0.026243 -0.024783 -0.023092 -0.021159 -0.018938 -0.016546 -0.013947 -0.01116 -0.0082314 -0.0051653 -0.0020516 0.0010865 0.0042964 0.0074375 0.010514 0.013559 0.016477 0.019281 0.021978 0.024522 0.026994 0.029331 0.031621 0.033888 0.036101 0.038309 0.0405 0.042668 0.044816 0.046823 0.048729 0.050487 0.052049 0.05337 0.054479 0.055328 0.055957 0.056299 0.056407 0.056237 0.055825 0.055132 0.054201 0.053021 0.051629 0.05009 0.04845 0.046696 0.044953 0.043222 0.041534 0.039939 0.038406 0.037009 0.035726 0.034554 0.033511 0.032585 0.031759 0.031061 0.030436 0.029909 0.029449 0.029038 0.028681 0.028371 0.028069 0.02779 0.02752 0.02725 0.026976 0.026676 0.026366 0.026019 0.025648 0.025253 0.024833 0.024398 0.023971 0.023534 0.023125 0.022746 0.022404 0.022118 0.021885 0.021733 0.021648 0.021655 0.021734 0.021917 0.022205 0.022606 0.023131 0.023766 0.024534 0.025456 0.026511 0.027723 0.029093 0.030597 0.032311 0.034136 0.036133 0.038275 0.040541 0.042962 0.045459 0.048036 0.050755 0.053483 0.056265 0.059076 0.06186 0.064689 0.067401 0.070043 0.072629 0.075075 0.077434 0.079668 0.081806 0.083933 0.08597 0.087995 0.090044 0.092186 0.09449 0.096979 0.099722 0.10287 0.10631 0.11018 0.11441 0.11904 0.12423 0.12976 0.13579 0.14225 0.1492 0.15669 0.1644 0.17238 0.18073 0.18904 0.19748 0.20579 0.21391 0.22195 0.22949 0.23667 0.24343 0.24959 0.25532 0.26032 0.26481 0.26876 0.27215 0.27509 0.27758 0.27969 0.28151 0.28302 0.28427 0.28534 0.2862 0.28694 0.28753 0.28798 0.2883 0.28848 0.28853 0.28841 0.28816 0.28779 0.2873 0.2867 0.28602 0.28527 0.28445 0.28358 0.28263 0.28165 0.28062 0.27955 0.27843 0.27727 0.27611 0.27498 0.27374 0.27252 0.2713 0.27006 0.26885 0.26765 0.26649 0.26536 0.26427 0.26324 0.26226 0.26133 0.26043 0.25966 0.25895 0.25834 0.25777 0.25727 0.2568 0.25639 0.25603 0.2557 0.25539 0.25508 0.25481 0.25456 0.2543 0.25406 0.25381 0.25355 0.25327 0.25296 0.2526 0.25217 0.25167 0.25111 0.25044 0.24969 0.24883 0.24787 0.24682 0.24564 0.24436 0.24296 0.24146 0.23988 0.23816 0.2364 0.23455 0.23266 0.23075 0.22877 0.2268 0.22482 0.22286 0.22091 0.21895 0.21704 0.21514 0.21328 0.21146 0.20964 0.20789 0.20616 0.20448 0.20285 0.20123 0.19969 0.19818 0.19674 0.19535 0.19401 0.19276 0.1916 0.19052 0.18957 0.18871 0.18797 0.18736 0.18686 0.18646 0.18618 0.18605 0.18612 0.18643 0.18698 0.18787 0.18907 0.19065 0.19258 0.19482 0.19743 0.20021 0.20314 0.20604 0.20882 0.21142 0.21369 0.21567 0.21723 0.21845 0.21937 0.22001 0.22047 0.22082 0.22115 0.22146 0.22179 0.22213 0.22248 0.2228 0.22309 0.22332 0.22349 0.22362 0.22377 0.22401 0.22437 0.22488 0.22552 0.22627 0.22705 0.22783 0.22854 0.22913 0.22963 0.23003 0.23035 0.23063 0.23082 0.23095 0.23107 0.23116 0.23123 0.23126 0.23122 0.23105 0.23072 0.23019 0.2295 0.22861 0.22757 0.22638 0.22508 0.22368 0.22223 0.22076 0.21928 0.21782 0.21639 0.21504 0.21376 0.21256 0.21145 0.21042 0.20947 0.20855 0.20764 0.20672 0.20573 0.2047 0.2036 0.20244 0.20124 0.19997 0.19874 0.19737 0.196 0.19461 0.19327 0.19204 0.19091 0.18998 0.18927 0.18881 0.18859 0.18862 0.18896 0.18958 0.19047 0.19171 0.1933 0.19524 0.19767 0.20052 0.20388 0.20775 0.21224 0.21744 0.22335 0.23034 0.23816 0.24705 0.25689 0.26758 0.27917 0.29138 0.30438 0.31753 0.33089 0.34404 0.35674 0.36904 0.38045 0.39129 0.40122 0.41035 0.41859 0.42591 0.43244 0.43784 0.44233 0.44577 0.4481 0.44932 0.44951 0.44873 0.44705 0.44463 0.44166 0.43824 0.43451 0.43061 0.42656 0.42249 0.41836 0.4143 0.41025 0.40626 0.40236 0.39846 0.39467 0.39087 0.38714 0.38342 0.37974 0.37612 0.37249 0.36896 0.36543 0.36202 0.35866 0.35548 0.35245 0.34957 0.34692 0.34447 0.34233 0.34045 0.3389 0.33769 0.33684 0.33636 0.33624 0.3365 0.33715 0.33816 0.33957 0.34135 0.34352 0.34605 0.3489 0.35205 0.35542 0.35908 0.36286 0.36683 0.37089 0.375 0.37921 0.38339 0.38763 0.39177 0.39591 0.39988 0.40376 0.40745 0.41098 0.41439 0.41758 0.42067 0.42356 0.42637 0.429 0.43154 0.43393 0.43617 0.43829 0.44026 0.44214 0.44385 0.44548 0.44693 0.44827 0.44946 0.45054 0.45143 0.45223 0.45287 0.45335 0.4537 0.45386 0.45387 0.45375 0.45347 0.45303 0.45243 0.45168 0.45075 0.44967 0.44841 0.44693 0.44533 0.44354 0.44174 0.4398 0.4379 0.43597 0.43402 0.43204 0.42998 0.42787 0.42565 0.42343 0.42108 0.41878 0.41642 0.4141 0.41175 0.40943 0.40713 0.40482 0.4025 0.40015 0.39784 0.39546 0.39311 0.39073 0.38842 0.3861 0.38384 0.38161 0.37942 0.37731 0.37523 0.3732 0.3712 0.36925 0.36734 0.36548 0.36362 0.36183 0.36007 0.35841 0.35682 0.35534 0.35398 0.35274 0.35166 0.35083 0.3502 0.34988 0.34989 0.35026 0.35102 0.35222 0.3539 0.35603 0.3587 0.36185 0.36545 0.36962 0.37416 0.37918 0.38452 0.3902 0.39599 0.40193 0.40785 0.41378 0.41962 0.42546 0.43122 0.43705 0.44302 0.44895 0.45486 0.46036 0.46517 0.46891 0.4714 0.4726 0.4728 0.47239 0.47185 0.47156 0.4718 0.47267 0.47419 0.4762 0.47848 0.48072 0.48274 0.48427 0.48527 0.48577 0.48597 0.4859 0.48565 0.48523 0.48466 0.48391 0.48304 0.48203 0.48102 0.48003 0.47916 0.47843 0.47779 0.47717 0.47647 0.47556 0.4744 0.47308 0.47164 0.47033 0.46927 0.46851 0.46809 0.46788 0.4678 0.46778 0.46778 0.46773 0.46759 0.46742 0.46713 0.46682 0.46649 0.46623 0.46614 0.46618 0.46642 0.46696 0.46776 0.46885 0.47032 0.47209 0.4743 0.47675 0.47954 0.48255 0.48575 0.48906 0.49251 0.49592 0.49945 0.50299 0.50648 0.50995 0.51343 0.51688 0.52054 0.52415 0.52797 0.53186 0.53598 0.54012 0.54433 0.54853 0.55276 0.55686 0.56082 0.56461 0.56836 0.57197 0.57553 0.5789 0.58227 0.58559 0.58884 0.59197 0.59503 0.59797 0.6006 0.60307 0.60533 0.6074 0.60911 0.6106 0.61181 0.61284 0.61346 0.6138 0.61395 0.6138 0.61345 0.61281
-0.030318 -0.030404 -0.030465 -0.030494 -0.030492 -0.030456 -0.030347 -0.030184 -0.029923 -0.029577 -0.029087 -0.028464 -0.027647 -0.026641 -0.025394 -0.023892 -0.022165 -0.020182 -0.017909 -0.01547 -0.012836 -0.010006 -0.0070358 -0.0039368 -0.0007902 0.0023722 0.0055991 0.0087555 0.011842 0.014886 0.017805 0.020603 0.023292 0.025825 0.028287 0.030616 0.032893 0.035147 0.03735 0.03954 0.041726 0.043873 0.045999 0.047986 0.049876 0.051607 0.053152 0.054455 0.055544 0.056375 0.056997 0.05732 0.057415 0.057245 0.056829 0.056135 0.055212 0.054044 0.052666 0.05114 0.049518 0.047787 0.046058 0.044345 0.042682 0.041097 0.03958 0.038193 0.036918 0.035755 0.034721 0.0338 0.032979 0.032284 0.031665 0.03114 0.030685 0.030274 0.029919 0.029614 0.029317 0.029036 0.028768 0.028503 0.028231 0.027937 0.027633 0.027293 0.026921 0.026535 0.02612 0.025694 0.025274 0.024844 0.024442 0.02407 0.023731 0.023448 0.023221 0.023079 0.022999 0.023003 0.023087 0.023278 0.023573 0.023976 0.024503 0.025145 0.025909 0.026835 0.027894 0.029102 0.030473 0.031975 0.033683 0.0355 0.037491 0.039624 0.041881 0.044292 0.046773 0.049336 0.052036 0.054745 0.057515 0.060296 0.063056 0.065864 0.068554 0.071183 0.073746 0.076176 0.078517 0.080739 0.082859 0.084973 0.086994 0.089005 0.091052 0.093177 0.095469 0.09794 0.10067 0.10379 0.10721 0.11105 0.11525 0.11986 0.12502 0.13052 0.13653 0.14297 0.1499 0.15735 0.16505 0.17301 0.18135 0.18967 0.19809 0.2064 0.21451 0.22256 0.23013 0.23732 0.2441 0.25025 0.256 0.26101 0.26551 0.26947 0.27288 0.27582 0.27832 0.28043 0.28226 0.28376 0.28501 0.28608 0.28696 0.2877 0.28828 0.28873 0.28905 0.28923 0.28928 0.28916 0.28892 0.28854 0.28805 0.28744 0.28676 0.28602 0.2852 0.28432 0.28339 0.28241 0.28139 0.2803 0.27918 0.27802 0.27685 0.2757 0.27446 0.27322 0.27199 0.27075 0.26954 0.26833 0.26716 0.26602 0.26494 0.26391 0.26292 0.26199 0.26108 0.2603 0.2596 0.25898 0.2584 0.25789 0.25742 0.257 0.25663 0.2563 0.25598 0.25567 0.2554 0.25514 0.25489 0.25465 0.2544 0.25413 0.25385 0.25354 0.25317 0.25276 0.25225 0.25169 0.25102 0.25027 0.24941 0.24845 0.2474 0.24622 0.24495 0.24354 0.24205 0.24047 0.23875 0.23699 0.23514 0.23325 0.23133 0.22936 0.22739 0.22541 0.22344 0.2215 0.21954 0.21761 0.21573 0.21386 0.21204 0.21023 0.20846 0.20674 0.20505 0.20342 0.2018 0.20025 0.19875 0.19729 0.19591 0.19456 0.19331 0.19214 0.19107 0.1901 0.18923 0.18849 0.18787 0.18735 0.18694 0.18666 0.18652 0.18659 0.18688 0.18743 0.18832 0.18952 0.1911 0.19301 0.19525 0.19785 0.20062 0.20353 0.20642 0.20918 0.21176 0.21401 0.21595 0.21747 0.21866 0.21955 0.22015 0.2206 0.22092 0.22122 0.22152 0.22183 0.22217 0.22251 0.22284 0.22313 0.22337 0.22357 0.22374 0.22393 0.2242 0.22459 0.22513 0.2258 0.22656 0.22735 0.22812 0.22883 0.22941 0.2299 0.23028 0.23059 0.23085 0.23104 0.23118 0.23131 0.23141 0.23149 0.23155 0.23151 0.23135 0.23103 0.2305 0.2298 0.22892 0.22786 0.22666 0.22536 0.22396 0.22251 0.22103 0.21952 0.21806 0.21663 0.21526 0.21399 0.21277 0.21166 0.21062 0.20965 0.20872 0.20782 0.20689 0.20591 0.20487 0.20377 0.20259 0.20139 0.2001 0.19887 0.1975 0.19611 0.19473 0.19337 0.19214 0.19102 0.19009 0.18937 0.18891 0.1887 0.18875 0.18908 0.1897 0.19059 0.19184 0.19344 0.19539 0.19785 0.20072 0.2041 0.20799 0.2125 0.21772 0.22367 0.23072 0.23858 0.24749 0.25738 0.2681 0.27974 0.29201 0.30504 0.31824 0.33166 0.34485 0.35757 0.36991 0.38135 0.3922 0.40214 0.41127 0.41953 0.42688 0.4334 0.43884 0.44335 0.44679 0.44914 0.45037 0.45059 0.44984 0.44816 0.44578 0.44283 0.43943 0.43573 0.43183 0.42779 0.42374 0.41965 0.4156 0.41154 0.40757 0.40367 0.39979 0.396 0.39219 0.38846 0.38473 0.38105 0.37743 0.37379 0.37028 0.36672 0.36331 0.35993 0.35673 0.35368 0.35079 0.34813 0.34566 0.34351 0.34162 0.34006 0.33882 0.33796 0.33747 0.33734 0.33758 0.33822 0.33922 0.34065 0.34239 0.34456 0.34711 0.34991 0.35307 0.35644 0.36009 0.36386 0.36784 0.37185 0.37599 0.3802 0.38438 0.38859 0.39274 0.39685 0.40084 0.4047 0.40839 0.41191 0.41532 0.41852 0.4216 0.42449 0.42728 0.4299 0.43242 0.43481 0.43702 0.43916 0.44114 0.44299 0.44469 0.44628 0.44772 0.44907 0.45026 0.45134 0.45222 0.45302 0.45366 0.45414 0.45449 0.45465 0.45468 0.45454 0.45423 0.45379 0.4532 0.45245 0.45153 0.45044 0.4492 0.44774 0.44616 0.44438 0.44258 0.44068 0.43876 0.43683 0.4349 0.43292 0.43089 0.42879 0.4266 0.42438 0.42205 0.41975 0.41739 0.41508 0.41276 0.41046 0.40818 0.40587 0.40355 0.40121 0.39889 0.39649 0.39416 0.3918 0.38947 0.38718 0.38491 0.38267 0.38048 0.37835 0.37628 0.37427 0.37228 0.37038 0.36846 0.3666 0.36473 0.36297 0.36121 0.35955 0.35792 0.35645 0.35505 0.35378 0.35272 0.35186 0.35122 0.35087 0.35088 0.35125 0.35201 0.35321 0.35488 0.35699 0.35961 0.36277 0.36638 0.37053 0.37509 0.3801 0.38545 0.39114 0.39695 0.40291 0.40884 0.41474 0.42058 0.42639 0.43217 0.43799 0.44393 0.44986 0.45575 0.46122 0.46604 0.46974 0.47219 0.47337 0.4735 0.4731 0.47254 0.4722 0.4724 0.47324 0.47473 0.47672 0.47897 0.48121 0.48322 0.48472 0.48578 0.48632 0.4865 0.48647 0.48619 0.4858 0.48519 0.48446 0.4836 0.48258 0.48159 0.4806 0.47975 0.47901 0.47835 0.47769 0.47698 0.47607 0.47492 0.47358 0.47221 0.47091 0.46985 0.4691 0.46867 0.46846 0.46838 0.46837 0.46833 0.46826 0.46818 0.46804 0.46772 0.46742 0.4671 0.46686 0.46671 0.46677 0.46708 0.4676 0.46837 0.46946 0.47095 0.47276 0.47494 0.47742 0.48027 0.48328 0.48645 0.48975 0.49319 0.49662 0.50014 0.50366 0.50717 0.51059 0.5141 0.51756 0.52114 0.52476 0.52858 0.53251 0.53657 0.54067 0.54488 0.54903 0.55324 0.5573 0.56128 0.5651 0.56883 0.57236 0.57585 0.57923 0.5826 0.5859 0.58914 0.59225 0.59523 0.59815 0.60072 0.60325 0.60546 0.60748 0.60923 0.61074 0.6119 0.61289 0.61353 0.61393 0.61403 0.61391 0.6135 0.61287
-0.03379 -0.033872 -0.033922 -0.033942 -0.033934 -0.033887 -0.033758 -0.03358 -0.033295 -0.032916 -0.032387 -0.031719 -0.030836 -0.02975 -0.028407 -0.026797 -0.024929 -0.022803 -0.020355 -0.017723 -0.014868 -0.011792 -0.0085642 -0.0051905 -0.0017602 0.0017047 0.0052304 0.0086804 0.012038 0.015344 0.018498 0.021512 0.024389 0.027108 0.029737 0.032218 0.034637 0.037024 0.03936 0.041676 0.043987 0.04625 0.048493 0.050602 0.052608 0.054461 0.056114 0.057521 0.058702 0.05961 0.060284 0.060649 0.060769 0.060587 0.060157 0.059424 0.058444 0.057204 0.055744 0.054126 0.052408 0.050576 0.048752 0.046935 0.045175 0.0435 0.041891 0.040421 0.039067 0.037832 0.036728 0.035745 0.034868 0.034114 0.033443 0.032869 0.032366 0.031918 0.031517 0.031172 0.030832 0.030517 0.030213 0.029902 0.029591 0.029257 0.028911 0.028532 0.02812 0.02769 0.027237 0.026771 0.026319 0.02586 0.025434 0.025046 0.024695 0.024413 0.024188 0.024052 0.02399 0.024029 0.024154 0.024393 0.024744 0.025218 0.025828 0.026564 0.027434 0.028482 0.02967 0.031032 0.032559 0.034236 0.036142 0.038164 0.040366 0.042726 0.045209 0.04786 0.050586 0.05339 0.056332 0.059277 0.062273 0.065281 0.06826 0.071284 0.074173 0.076992 0.079753 0.082359 0.084879 0.087277 0.089563 0.091835 0.09402 0.096206 0.098441 0.10077 0.10333 0.1061 0.10917 0.11271 0.11658 0.12095 0.12574 0.13098 0.13684 0.14299 0.14976 0.15707 0.16483 0.17313 0.18167 0.19047 0.19966 0.2088 0.21803 0.22711 0.23596 0.24468 0.25291 0.26068 0.26805 0.27472 0.28097 0.2864 0.29123 0.29546 0.29907 0.30214 0.30471 0.30688 0.30873 0.31026 0.31151 0.31259 0.31345 0.31419 0.31475 0.31518 0.31545 0.31556 0.31554 0.31532 0.31497 0.31444 0.31379 0.31301 0.31214 0.3112 0.31016 0.3091 0.30796 0.3068 0.30556 0.30428 0.30297 0.30161 0.30024 0.29888 0.2974 0.29594 0.29449 0.29303 0.29163 0.29026 0.28894 0.28764 0.28638 0.28521 0.28407 0.28302 0.28197 0.28107 0.28026 0.27954 0.27888 0.2783 0.27775 0.27726 0.27683 0.27642 0.27606 0.27569 0.27538 0.27508 0.27477 0.27448 0.27417 0.27385 0.2735 0.27311 0.27267 0.27217 0.27158 0.27093 0.27015 0.26932 0.26837 0.2673 0.26615 0.26485 0.26345 0.26192 0.26029 0.25857 0.2567 0.25479 0.25279 0.25074 0.24867 0.24653 0.2444 0.24227 0.24013 0.23803 0.2359 0.23382 0.23177 0.22976 0.22779 0.22581 0.22391 0.22204 0.22021 0.21844 0.21669 0.21501 0.21338 0.21181 0.21032 0.20887 0.20753 0.20629 0.20513 0.20411 0.2032 0.20242 0.20177 0.20122 0.20081 0.2005 0.20036 0.20042 0.20073 0.2013 0.20225 0.20352 0.20519 0.20723 0.2096 0.21237 0.21531 0.2184 0.22147 0.22442 0.22719 0.22963 0.23179 0.23353 0.2349 0.23597 0.23674 0.23733 0.2378 0.23823 0.23863 0.23904 0.23945 0.23984 0.24019 0.24046 0.24067 0.24082 0.24091 0.24103 0.24126 0.24162 0.24217 0.24287 0.24369 0.24456 0.24541 0.24621 0.24691 0.24751 0.248 0.2484 0.24876 0.24903 0.24923 0.2494 0.24953 0.24963 0.24969 0.24966 0.2495 0.24917 0.24862 0.24789 0.24697 0.24587 0.24459 0.24323 0.24174 0.24021 0.23864 0.23703 0.23547 0.23393 0.23247 0.23109 0.22978 0.22857 0.22743 0.22638 0.22536 0.22436 0.22334 0.22225 0.22111 0.21989 0.2186 0.21728 0.2159 0.21457 0.21308 0.21161 0.21015 0.20873 0.20743 0.20627 0.20532 0.2046 0.20417 0.204 0.20412 0.20456 0.20532 0.20638 0.20784 0.2097 0.21195 0.21479 0.21808 0.22197 0.22645 0.23164 0.23762 0.24443 0.25244 0.26138 0.27145 0.28265 0.29483 0.308 0.32183 0.3365 0.35133 0.36639 0.38117 0.39541 0.40917 0.4219 0.43399 0.44501 0.45513 0.4642 0.47228 0.47946 0.4854 0.49031 0.49404 0.49654 0.49782 0.498 0.49711 0.49522 0.49252 0.48924 0.48541 0.48127 0.47692 0.47237 0.46781 0.46317 0.45859 0.45401 0.4495 0.44505 0.44062 0.43628 0.4319 0.42763 0.42335 0.41915 0.41499 0.41086 0.40681 0.40278 0.3989 0.39509 0.39147 0.38801 0.38471 0.38169 0.37884 0.37639 0.37418 0.37235 0.37088 0.36982 0.36915 0.36885 0.36897 0.3695 0.37043 0.37177 0.37352 0.37569 0.37824 0.38113 0.38438 0.38787 0.39167 0.39561 0.39975 0.40398 0.40831 0.41271 0.41711 0.42159 0.42595 0.43033 0.43453 0.43866 0.4426 0.44636 0.44998 0.45342 0.45676 0.45991 0.46293 0.46577 0.46852 0.47106 0.47348 0.47571 0.47779 0.47972 0.48148 0.48313 0.48458 0.48592 0.48711 0.48813 0.48904 0.48976 0.49035 0.49077 0.49101 0.49107 0.49098 0.49073 0.4903 0.48972 0.48899 0.48808 0.487 0.48572 0.48426 0.48258 0.48076 0.47877 0.47674 0.4746 0.47245 0.47031 0.46816 0.46596 0.46371 0.4614 0.45899 0.45655 0.45399 0.45144 0.44883 0.44627 0.44367 0.44111 0.43856 0.43602 0.43347 0.43091 0.42836 0.42576 0.4232 0.4206 0.41808 0.41556 0.41312 0.4107 0.40834 0.40606 0.4038 0.40159 0.39942 0.39732 0.39521 0.39319 0.39114 0.38925 0.38737 0.38561 0.3839 0.38234 0.3809 0.37966 0.37857 0.37774 0.37716 0.37693 0.37708 0.37762 0.37859 0.38003 0.38198 0.38446 0.38748 0.39103 0.39506 0.39967 0.40466 0.41016 0.41591 0.42201 0.4282 0.43455 0.44081 0.4471 0.45331 0.45952 0.4657 0.47198 0.47834 0.48472 0.49101 0.49687 0.50197 0.50594 0.5086 0.50996 0.51024 0.50992 0.50949 0.50931 0.5097 0.51081 0.51263 0.51493 0.5175 0.52002 0.52222 0.52382 0.52489 0.52542 0.52558 0.52552 0.52525 0.52481 0.52419 0.52346 0.52255 0.52151 0.52046 0.51948 0.51858 0.51787 0.5173 0.51673 0.51603 0.5151 0.51388 0.51242 0.51087 0.50945 0.5083 0.50751 0.50707 0.50688 0.50684 0.50683 0.50688 0.50686 0.50677 0.50667 0.50641 0.5061 0.50578 0.50554 0.50546 0.50556 0.50586 0.5065 0.50737 0.50862 0.51024 0.51223 0.5146 0.51731 0.52033 0.52364 0.52709 0.53068 0.53442 0.53814 0.54194 0.54569 0.5495 0.55329 0.55711 0.56088 0.5648 0.56871 0.57286 0.57705 0.58142 0.58581 0.59041 0.59486 0.59938 0.60369 0.60794 0.61206 0.61613 0.62003 0.62385 0.62755 0.63121 0.63482 0.63828 0.64168 0.6449 0.64801 0.65101 0.65373 0.65617 0.65847 0.66044 0.66213 0.66346 0.66446 0.66518 0.66563 0.66573 0.6655 0.66514 0.66447
-0.02583 -0.025928 -0.025997 -0.026024 -0.026021 -0.025976 -0.025835 -0.02567 -0.025349 -0.024956 -0.024381 -0.023655 -0.02271 -0.021534 -0.020079 -0.018342 -0.016309 -0.013995 -0.011349 -0.0084906 -0.0053904 -0.0020621 0.0014448 0.005104 0.008823 0.012578 0.01641 0.02016 0.023828 0.027438 0.030893 0.034196 0.03735 0.040307 0.043173 0.045863 0.04849 0.051086 0.053624 0.056166 0.058698 0.061192 0.063675 0.065992 0.068192 0.07023 0.072046 0.073584 0.074883 0.075879 0.076627 0.077044 0.077189 0.077007 0.076548 0.075741 0.074654 0.073248 0.07159 0.069746 0.067772 0.065666 0.063563 0.061474 0.059452 0.05754 0.0557 0.054021 0.05248 0.051069 0.049809 0.048698 0.047696 0.046839 0.046077 0.045422 0.044848 0.044325 0.043869 0.04347 0.043085 0.04273 0.042393 0.042053 0.041712 0.041345 0.040971 0.040556 0.040113 0.039646 0.039149 0.038641 0.038141 0.037638 0.037175 0.036744 0.036356 0.036043 0.03579 0.035632 0.035556 0.035593 0.035718 0.035968 0.036335 0.036836 0.037484 0.038267 0.039199 0.04032 0.041586 0.043043 0.044681 0.046484 0.048526 0.050698 0.053068 0.055609 0.058289 0.061147 0.064099 0.06713 0.070325 0.07353 0.076794 0.080077 0.083336 0.08664 0.089809 0.092909 0.095935 0.098804 0.10157 0.1042 0.10673 0.10925 0.11168 0.11411 0.1166 0.11921 0.12203 0.1251 0.1285 0.13239 0.13664 0.14139 0.14653 0.15218 0.15851 0.16522 0.17254 0.18045 0.18882 0.19779 0.20704 0.21654 0.22647 0.23632 0.24625 0.25602 0.26553 0.27491 0.28373 0.29206 0.29991 0.30705 0.3137 0.31947 0.3246 0.32911 0.33296 0.33625 0.33902 0.34135 0.34335 0.34499 0.34635 0.3475 0.34844 0.34923 0.34983 0.35029 0.35059 0.35073 0.35072 0.3505 0.35015 0.34962 0.34896 0.34816 0.34727 0.3463 0.34525 0.34412 0.34294 0.34171 0.34042 0.33908 0.33765 0.33621 0.33476 0.33333 0.33182 0.33032 0.32884 0.32734 0.32589 0.32445 0.32305 0.32171 0.32039 0.31915 0.31798 0.31688 0.31583 0.3149 0.31407 0.31331 0.3126 0.31198 0.3114 0.3109 0.31042 0.30999 0.3096 0.30921 0.30888 0.30855 0.30823 0.30791 0.30758 0.30723 0.30687 0.30646 0.306 0.30546 0.30484 0.30416 0.30334 0.30244 0.30143 0.30029 0.29906 0.29767 0.29616 0.29453 0.2928 0.29096 0.28896 0.28691 0.28477 0.28258 0.28037 0.27808 0.27581 0.27353 0.27125 0.269 0.26672 0.26449 0.2623 0.26014 0.25803 0.25592 0.25387 0.25186 0.2499 0.24801 0.24613 0.24433 0.24258 0.2409 0.2393 0.23777 0.23633 0.235 0.23379 0.23271 0.23177 0.23097 0.23033 0.2298 0.22939 0.22913 0.22904 0.22919 0.22962 0.23035 0.23149 0.233 0.23495 0.23731 0.24004 0.2432 0.24656 0.2501 0.25358 0.25695 0.26014 0.26298 0.26551 0.26758 0.26928 0.27061 0.27159 0.27239 0.27302 0.27359 0.27413 0.27466 0.27518 0.27567 0.27609 0.2764 0.27658 0.27663 0.2766 0.27655 0.27661 0.27682 0.27726 0.27789 0.2787 0.27958 0.28049 0.28136 0.28212 0.2828 0.28335 0.28381 0.28418 0.28442 0.28457 0.28465 0.28467 0.28465 0.28461 0.28445 0.28419 0.28375 0.28312 0.28229 0.28125 0.28005 0.27868 0.2772 0.27561 0.27395 0.27226 0.27055 0.26885 0.26719 0.26563 0.26414 0.26273 0.26143 0.26021 0.25908 0.25798 0.25689 0.25578 0.25459 0.25336 0.25203 0.25065 0.24922 0.24774 0.24628 0.24468 0.24309 0.24148 0.23995 0.23854 0.23728 0.23623 0.23543 0.23497 0.23478 0.2349 0.23535 0.23616 0.23732 0.23888 0.24087 0.24329 0.24632 0.24987 0.25407 0.25889 0.26449 0.27093 0.27823 0.28685 0.29646 0.30734 0.31935 0.33239 0.34647 0.36121 0.37679 0.3925 0.40843 0.42398 0.43899 0.45346 0.46679 0.47938 0.4909 0.50141 0.51087 0.51923 0.52666 0.53282 0.53787 0.54173 0.54434 0.54568 0.54587 0.545 0.54308 0.54037 0.53703 0.53311 0.52889 0.52446 0.51979 0.51514 0.51037 0.50569 0.50096 0.49635 0.4918 0.48724 0.48282 0.47834 0.47397 0.46961 0.46529 0.46102 0.45674 0.45256 0.44838 0.44435 0.44038 0.43659 0.43299 0.42955 0.42636 0.4234 0.42081 0.4185 0.41659 0.41502 0.4139 0.41321 0.41289 0.41302 0.41362 0.41461 0.41606 0.41791 0.42021 0.42294 0.42602 0.42947 0.43319 0.43723 0.44142 0.44581 0.45032 0.4549 0.45957 0.46424 0.46895 0.47357 0.47816 0.48256 0.48686 0.49095 0.49485 0.4986 0.50211 0.50547 0.50864 0.5117 0.51454 0.51728 0.51985 0.52227 0.52453 0.52662 0.5286 0.53039 0.53208 0.53357 0.53495 0.53619 0.53727 0.53824 0.53901 0.53967 0.54015 0.54048 0.5406 0.54056 0.54036 0.53998 0.53944 0.53875 0.53787 0.53682 0.53553 0.53409 0.53241 0.53059 0.52859 0.52657 0.52443 0.5223 0.5202 0.51809 0.51597 0.51376 0.51148 0.50908 0.50663 0.50406 0.50152 0.49891 0.49635 0.49377 0.49123 0.48864 0.48608 0.48352 0.48091 0.47834 0.47571 0.47311 0.47043 0.46782 0.46522 0.46268 0.46015 0.4577 0.45531 0.45297 0.45066 0.4484 0.44621 0.44402 0.44189 0.43978 0.43776 0.43578 0.43389 0.4321 0.43045 0.42889 0.42754 0.42639 0.4255 0.42492 0.42468 0.42483 0.42543 0.42652 0.42806 0.43018 0.43286 0.43607 0.43994 0.44429 0.44927 0.45467 0.46058 0.46676 0.47331 0.47997 0.48676 0.49348 0.5002 0.50687 0.51347 0.52003 0.52666 0.53339 0.54004 0.54662 0.55268 0.55809 0.56224 0.56516 0.56669 0.56724 0.56721 0.56707 0.56725 0.56801 0.56952 0.57173 0.57439 0.57726 0.57993 0.58211 0.58358 0.58432 0.58446 0.5842 0.58381 0.58332 0.58278 0.58212 0.58125 0.58037 0.5794 0.57845 0.57761 0.57698 0.57653 0.57617 0.57588 0.57545 0.57464 0.5734 0.57182 0.57007 0.56842 0.56706 0.56607 0.56552 0.56525 0.56522 0.56529 0.5653 0.56531 0.56521 0.5651 0.56487 0.56453 0.56426 0.56402 0.56393 0.56401 0.56435 0.56492 0.56583 0.56707 0.56876 0.5708 0.57318 0.57594 0.579 0.58233 0.58581 0.58944 0.59321 0.5969 0.60076 0.60452 0.60832 0.61211 0.61592 0.61968 0.62361 0.62755 0.63167 0.63592 0.64035 0.64484 0.64945 0.65402 0.65858 0.66304 0.66745 0.67159 0.67569 0.67964 0.68352 0.68729 0.69103 0.69459 0.69807 0.70148 0.70469 0.70784 0.71076 0.71349 0.71592 0.71826 0.7202 0.72186 0.72326 0.72434 0.725 0.72541 0.72551 0.72532 0.72487 0.72422
-0.023874 -0.02397 -0.024033 -0.024051 -0.024046 -0.023983 -0.023843 -0.023652 -0.023325 -0.022913 -0.022328 -0.021576 -0.020605 -0.019397 -0.017908 -0.016108 -0.01401 -0.011625 -0.0088858 -0.0059355 -0.0027356 0.0006982 0.0043043 0.0080618 0.011883 0.01573 0.019648 0.023469 0.027202 0.030871 0.034371 0.037716 0.040902 0.04389 0.046788 0.049511 0.052171 0.054797 0.057367 0.059931 0.062492 0.065016 0.067507 0.069847 0.072075 0.074122 0.075951 0.077502 0.078803 0.079801 0.080539 0.080935 0.081059 0.080852 0.08036 0.079524 0.078411 0.076992 0.07532 0.073469 0.071496 0.069396 0.067299 0.065227 0.063215 0.061303 0.059473 0.057811 0.056284 0.054886 0.053642 0.052538 0.051554 0.050714 0.049962 0.049318 0.048756 0.048254 0.047807 0.04742 0.047042 0.046693 0.046353 0.04602 0.045676 0.045314 0.044945 0.044533 0.044094 0.043623 0.043137 0.04263 0.042136 0.041635 0.041173 0.040748 0.040365 0.040055 0.039814 0.03967 0.03961 0.039655 0.03979 0.040055 0.040441 0.040963 0.041634 0.042438 0.043397 0.04454 0.04584 0.047327 0.048999 0.050836 0.052909 0.055107 0.057502 0.060066 0.062774 0.065648 0.068608 0.071651 0.074849 0.078041 0.08131 0.084591 0.087827 0.091125 0.094277 0.097359 0.10037 0.10322 0.10598 0.10861 0.11113 0.11365 0.11608 0.11852 0.12101 0.12362 0.12644 0.1295 0.13289 0.13676 0.14098 0.14565 0.15079 0.15642 0.16272 0.16938 0.17664 0.18446 0.19273 0.20155 0.21065 0.21998 0.22971 0.23936 0.24907 0.25863 0.2679 0.27706 0.28565 0.29379 0.30146 0.30845 0.31497 0.32062 0.32565 0.33004 0.33375 0.3369 0.33954 0.34175 0.34364 0.34521 0.34651 0.34762 0.34853 0.34929 0.34989 0.35034 0.35066 0.3508 0.3508 0.35061 0.35029 0.34979 0.34917 0.34841 0.34757 0.34666 0.34566 0.34461 0.34349 0.34233 0.34111 0.33983 0.33848 0.33711 0.33573 0.33437 0.3329 0.33144 0.32998 0.3285 0.32705 0.32563 0.32422 0.32289 0.32157 0.32033 0.31917 0.31806 0.31699 0.31607 0.31522 0.31446 0.31375 0.31312 0.31255 0.31203 0.31155 0.3111 0.31072 0.31033 0.30998 0.30965 0.30932 0.309 0.3087 0.30837 0.30802 0.30762 0.30717 0.30666 0.30606 0.3054 0.30462 0.30375 0.30277 0.30167 0.30049 0.29913 0.29769 0.29611 0.29442 0.29264 0.29071 0.28874 0.28666 0.28453 0.28237 0.28015 0.27795 0.27573 0.27352 0.27133 0.26912 0.26696 0.26482 0.26271 0.26066 0.25861 0.25661 0.25466 0.25275 0.2509 0.24907 0.24732 0.24562 0.24398 0.24242 0.24091 0.23951 0.23821 0.23702 0.23594 0.23499 0.23419 0.23351 0.23295 0.23252 0.2322 0.23206 0.23216 0.23253 0.23321 0.23428 0.23572 0.23761 0.23991 0.24259 0.24569 0.24898 0.25244 0.25583 0.25911 0.26221 0.26498 0.26744 0.26943 0.27105 0.27232 0.27323 0.27394 0.27447 0.27495 0.27539 0.27584 0.27628 0.27671 0.27709 0.27738 0.27758 0.27767 0.27767 0.2777 0.27782 0.2781 0.2786 0.27926 0.2801 0.28101 0.28192 0.2828 0.28356 0.28422 0.28477 0.28521 0.28558 0.28581 0.28597 0.28606 0.28609 0.28609 0.28605 0.28592 0.28567 0.28525 0.28462 0.2838 0.28278 0.28158 0.28022 0.27874 0.27717 0.27553 0.27386 0.27216 0.27049 0.26884 0.26729 0.26581 0.26442 0.26313 0.26193 0.26081 0.25974 0.25867 0.25758 0.25641 0.2552 0.25392 0.25256 0.25115 0.24968 0.24826 0.2467 0.24512 0.24357 0.24206 0.24069 0.23945 0.23843 0.23768 0.2372 0.23703 0.23715 0.23763 0.23844 0.23957 0.24111 0.24306 0.24544 0.24842 0.2519 0.25601 0.2607 0.26614 0.27238 0.27947 0.28781 0.29711 0.30756 0.31915 0.33167 0.3452 0.35929 0.37422 0.38923 0.4044 0.41927 0.43356 0.4473 0.46001 0.47201 0.48296 0.49299 0.50201 0.50999 0.51708 0.52296 0.52783 0.53156 0.53408 0.53541 0.53566 0.53489 0.53314 0.53058 0.52744 0.52378 0.51978 0.51558 0.51121 0.50678 0.5023 0.49788 0.49341 0.48904 0.4847 0.48039 0.47617 0.47193 0.46777 0.46361 0.45951 0.45543 0.45139 0.4474 0.44342 0.43961 0.43581 0.4322 0.42875 0.42548 0.42244 0.41961 0.41712 0.41491 0.41308 0.4116 0.41053 0.40985 0.40954 0.40962 0.41015 0.41104 0.41236 0.41407 0.4162 0.41873 0.42158 0.42481 0.4283 0.43211 0.43605 0.4402 0.44446 0.4488 0.45324 0.45765 0.46213 0.46651 0.47088 0.47507 0.47915 0.48302 0.48673 0.49028 0.49361 0.49687 0.4999 0.50282 0.50557 0.50818 0.51065 0.51293 0.51505 0.51704 0.51891 0.52058 0.52212 0.52348 0.52476 0.52587 0.52687 0.52771 0.52846 0.529 0.52939 0.52959 0.52965 0.52955 0.52928 0.52888 0.52833 0.52761 0.52675 0.52572 0.52446 0.52305 0.52146 0.51969 0.51776 0.51579 0.51377 0.51172 0.5097 0.5077 0.50565 0.5035 0.50131 0.49902 0.49665 0.49418 0.49171 0.48921 0.48671 0.48421 0.48177 0.47928 0.47682 0.47436 0.47184 0.46936 0.4668 0.46425 0.46169 0.45918 0.45669 0.45428 0.45184 0.44951 0.44721 0.44495 0.44275 0.44057 0.43847 0.43638 0.43432 0.43229 0.43037 0.42845 0.42664 0.4249 0.4233 0.42183 0.42051 0.41935 0.41848 0.41784 0.41755 0.41762 0.41809 0.41903 0.42047 0.42237 0.42485 0.42783 0.43142 0.43551 0.44018 0.44527 0.45082 0.45664 0.46281 0.46912 0.47558 0.482 0.48838 0.49471 0.50101 0.5073 0.51364 0.52006 0.52648 0.53281 0.53868 0.54387 0.54795 0.5507 0.55216 0.55267 0.55255 0.55234 0.55242 0.55308 0.55438 0.55641 0.55888 0.5616 0.56407 0.56616 0.56758 0.56831 0.56852 0.56834 0.56803 0.56753 0.567 0.56629 0.56548 0.56454 0.56356 0.56258 0.56171 0.56105 0.56053 0.56011 0.55979 0.55931 0.5585 0.55733 0.55584 0.55411 0.55252 0.55126 0.55037 0.54989 0.54968 0.54965 0.54973 0.5498 0.54979 0.54973 0.54962 0.54938 0.54909 0.54883 0.54862 0.54854 0.54862 0.54892 0.54952 0.55044 0.55165 0.55322 0.55521 0.55757 0.56023 0.56318 0.56642 0.56981 0.5733 0.57698 0.58058 0.58427 0.58791 0.59154 0.59511 0.59875 0.60236 0.60609 0.6099 0.61381 0.61782 0.62187 0.62612 0.63044 0.63473 0.63913 0.64328 0.64743 0.65133 0.65529 0.659 0.6627 0.66628 0.66976 0.67319 0.67648 0.67967 0.68275 0.68577 0.68855 0.69119 0.69357 0.69573 0.69753 0.69912 0.70037 0.70135 0.70199 0.70233 0.70243 0.70222 0.70178 0.70115
-0.026043 -0.026135 -0.026201 -0.026226 -0.026225 -0.026166 -0.026037 -0.025855 -0.025533 -0.025125 -0.024529 -0.023782 -0.022805 -0.021589 -0.020081 -0.018267 -0.016159 -0.013756 -0.011004 -0.0080367 -0.0048282 -0.001382 0.0022363 0.0060104 0.0098411 0.013697 0.017622 0.021459 0.025208 0.028905 0.032434 0.035818 0.039055 0.042102 0.045051 0.047837 0.05056 0.053245 0.055867 0.05848 0.061076 0.063633 0.066164 0.06852 0.070767 0.072838 0.074677 0.076228 0.077525 0.07852 0.079249 0.079636 0.07975 0.079531 0.079024 0.078179 0.077058 0.075638 0.073965 0.072121 0.070156 0.068059 0.065971 0.063897 0.061885 0.05998 0.058151 0.056482 0.054949 0.053546 0.052294 0.051187 0.050198 0.049353 0.048606 0.047959 0.047393 0.046886 0.046444 0.046056 0.045681 0.045333 0.045 0.044668 0.044327 0.043963 0.04359 0.043173 0.042726 0.042254 0.04175 0.041236 0.040731 0.040212 0.039736 0.039297 0.038902 0.038577 0.038322 0.038166 0.03809 0.038125 0.038252 0.03851 0.038887 0.039403 0.040074 0.040875 0.041833 0.042979 0.044285 0.045774 0.047454 0.049297 0.051382 0.053602 0.056025 0.058621 0.061361 0.064273 0.067283 0.070372 0.073622 0.076878 0.080195 0.083527 0.086822 0.090172 0.093379 0.096504 0.099555 0.10244 0.10523 0.10788 0.11042 0.11296 0.11539 0.11782 0.12031 0.12291 0.12572 0.12878 0.13214 0.13601 0.14023 0.14492 0.15005 0.15569 0.16201 0.16869 0.17597 0.18382 0.19214 0.20102 0.21018 0.21959 0.22941 0.23916 0.24899 0.25866 0.26807 0.27735 0.28608 0.29434 0.30216 0.30926 0.31588 0.32163 0.32673 0.33116 0.33491 0.33809 0.34075 0.34298 0.34487 0.34644 0.34774 0.34885 0.34975 0.35052 0.35112 0.35157 0.35187 0.35201 0.35202 0.35183 0.35148 0.35098 0.35035 0.34961 0.34876 0.34783 0.34684 0.34577 0.34465 0.34348 0.34223 0.34094 0.33956 0.33817 0.33677 0.33539 0.3339 0.33244 0.33098 0.32951 0.32806 0.32665 0.32527 0.32394 0.32264 0.32143 0.32027 0.31917 0.31811 0.31722 0.31639 0.31565 0.31495 0.31434 0.31379 0.31329 0.31284 0.3124 0.31204 0.31167 0.31134 0.31102 0.31071 0.3104 0.31009 0.30978 0.30944 0.30905 0.30861 0.30809 0.30749 0.30682 0.30604 0.30517 0.30418 0.30308 0.30186 0.3005 0.29904 0.29744 0.29572 0.2939 0.29193 0.28991 0.28779 0.28563 0.28343 0.28116 0.27891 0.27665 0.27439 0.27215 0.26988 0.26768 0.26549 0.26334 0.26124 0.25915 0.2571 0.2551 0.25314 0.25124 0.24937 0.24756 0.24581 0.24412 0.24251 0.24095 0.23949 0.23814 0.23689 0.23576 0.23476 0.23391 0.23317 0.23257 0.2321 0.23178 0.23163 0.23172 0.23209 0.23276 0.23384 0.23529 0.23719 0.2395 0.24219 0.24529 0.24859 0.25203 0.2554 0.25866 0.26169 0.26439 0.26676 0.26868 0.27021 0.27139 0.27224 0.2729 0.2734 0.27386 0.27429 0.27474 0.2752 0.27566 0.27607 0.27641 0.27664 0.27679 0.27686 0.27696 0.27717 0.2775 0.27803 0.27874 0.27957 0.28048 0.28139 0.28224 0.28297 0.2836 0.28411 0.28453 0.28488 0.28512 0.28528 0.2854 0.28547 0.28551 0.28551 0.28541 0.28521 0.2848 0.2842 0.28339 0.28236 0.28117 0.27981 0.27831 0.27671 0.27506 0.27338 0.27166 0.26997 0.26832 0.26676 0.26527 0.26386 0.26258 0.26137 0.26025 0.25917 0.2581 0.25701 0.25584 0.25462 0.25333 0.25196 0.25053 0.24904 0.2476 0.24601 0.24441 0.24283 0.24129 0.23989 0.23864 0.23759 0.2368 0.2363 0.23611 0.23621 0.23667 0.23745 0.23858 0.24013 0.24209 0.24447 0.24745 0.25093 0.25504 0.25975 0.2652 0.27147 0.27857 0.28697 0.29631 0.30687 0.31853 0.33116 0.3448 0.35905 0.37414 0.38932 0.40472 0.41976 0.43425 0.44821 0.46113 0.47329 0.48445 0.49464 0.50385 0.51198 0.51921 0.52522 0.53018 0.53396 0.53653 0.53788 0.53811 0.53729 0.53547 0.53285 0.52963 0.52585 0.52175 0.51742 0.51293 0.50841 0.50378 0.49924 0.49468 0.49021 0.4858 0.48138 0.47709 0.47275 0.46852 0.46428 0.4601 0.45596 0.45182 0.44779 0.44372 0.43983 0.436 0.43234 0.42883 0.42549 0.42243 0.41958 0.41708 0.41487 0.41304 0.41157 0.41053 0.40991 0.40966 0.40983 0.41043 0.41144 0.41286 0.41469 0.41698 0.41964 0.42264 0.42604 0.42968 0.43363 0.43772 0.44205 0.44647 0.45098 0.45559 0.46016 0.46478 0.46933 0.47386 0.47818 0.48243 0.48643 0.49027 0.49394 0.4974 0.50077 0.50392 0.50696 0.50979 0.51253 0.51508 0.51743 0.51964 0.52169 0.52363 0.52538 0.52699 0.52841 0.52973 0.53089 0.53194 0.53285 0.53359 0.53417 0.53457 0.53479 0.53487 0.53477 0.5345 0.53408 0.53353 0.53278 0.53188 0.53081 0.52955 0.52809 0.52643 0.52461 0.52262 0.52058 0.51845 0.51636 0.51427 0.51217 0.51006 0.50788 0.50563 0.50329 0.5009 0.49838 0.49587 0.49329 0.49073 0.4882 0.48565 0.48312 0.48056 0.47802 0.47547 0.47291 0.47027 0.46769 0.46507 0.46251 0.45995 0.45749 0.45504 0.45264 0.45031 0.448 0.44573 0.44351 0.44135 0.43919 0.43707 0.43498 0.43301 0.43104 0.42919 0.42739 0.42576 0.42423 0.42287 0.42171 0.42076 0.42014 0.41982 0.41985 0.42034 0.42128 0.4227 0.42466 0.42715 0.43021 0.43388 0.43803 0.44283 0.44803 0.45376 0.45976 0.46609 0.47256 0.47916 0.48569 0.4922 0.49867 0.50509 0.51152 0.51799 0.52455 0.53108 0.53757 0.54354 0.54883 0.55292 0.5557 0.55719 0.55765 0.5575 0.5572 0.55722 0.5578 0.55905 0.56108 0.56351 0.56621 0.56878 0.57095 0.57244 0.57327 0.57354 0.57349 0.57317 0.57273 0.57214 0.57144 0.57059 0.56967 0.56863 0.5676 0.56667 0.56592 0.56534 0.56489 0.56448 0.56393 0.56311 0.56183 0.56023 0.55854 0.55692 0.55563 0.55472 0.55423 0.55399 0.55396 0.55399 0.55404 0.55402 0.55391 0.5538 0.55351 0.55319 0.55284 0.55263 0.55253 0.55261 0.55289 0.55347 0.55435 0.55565 0.55729 0.55928 0.56165 0.56443 0.56747 0.57077 0.57424 0.57788 0.5816 0.58533 0.58921 0.59291 0.59668 0.60037 0.60418 0.60791 0.61173 0.61563 0.61969 0.62365 0.628 0.63233 0.63677 0.64124 0.64566 0.64999 0.65419 0.65826 0.6622 0.66601 0.66986 0.67348 0.67712 0.68057 0.68398 0.68725 0.69046 0.69354 0.69636 0.69902 0.70139 0.70358 0.70541 0.70702 0.70832 0.70928 0.71 0.71023 0.71029 0.71005 0.70967 0.70895
-0.021187 -0.021291 -0.021365 -0.021406 -0.0214 -0.021353 -0.021217 -0.02103 -0.020715 -0.020313 -0.01973 -0.018988 -0.018013 -0.01681 -0.015311 -0.013507 -0.011416 -0.0090273 -0.0062896 -0.0033442 -0.0001565 0.0032629 0.0068507 0.010601 0.014404 0.018229 0.022136 0.025949 0.02967 0.033347 0.036862 0.040223 0.043443 0.046467 0.049407 0.05218 0.054894 0.057566 0.06018 0.062779 0.065363 0.06791 0.070434 0.072782 0.075019 0.077077 0.078908 0.080445 0.081733 0.082723 0.083453 0.083838 0.083945 0.083731 0.08323 0.082387 0.081269 0.079852 0.078184 0.076342 0.074374 0.072281 0.070198 0.068126 0.066111 0.064201 0.062361 0.060685 0.059146 0.057741 0.056483 0.055367 0.054371 0.053512 0.052749 0.0521 0.051527 0.051016 0.050565 0.050174 0.049793 0.049439 0.0491 0.048762 0.048419 0.048052 0.047672 0.047254 0.0468 0.046322 0.045811 0.045287 0.044766 0.044239 0.043754 0.043305 0.042903 0.042566 0.042298 0.042126 0.042041 0.042062 0.042174 0.042423 0.042786 0.043288 0.043943 0.044729 0.04567 0.046799 0.048085 0.049559 0.051213 0.053035 0.055102 0.057302 0.059702 0.06228 0.064999 0.067904 0.070897 0.073981 0.077219 0.080474 0.083785 0.087121 0.090421 0.093763 0.096964 0.10008 0.10313 0.10602 0.1088 0.11144 0.11396 0.11647 0.11889 0.1213 0.12375 0.12631 0.12908 0.13209 0.13541 0.13922 0.14334 0.14795 0.15303 0.15859 0.16479 0.17136 0.17854 0.18627 0.19447 0.20326 0.2123 0.22162 0.23134 0.24101 0.25077 0.26037 0.26971 0.27894 0.28763 0.29586 0.30364 0.3107 0.31729 0.323 0.32808 0.33248 0.3362 0.33935 0.34198 0.34416 0.34603 0.34756 0.34885 0.34993 0.35082 0.35156 0.35214 0.35258 0.35287 0.35299 0.35298 0.35277 0.35243 0.35193 0.3513 0.35053 0.3497 0.34879 0.3478 0.34674 0.34563 0.34449 0.34325 0.34197 0.34061 0.33924 0.33784 0.33646 0.335 0.33353 0.33207 0.3306 0.32918 0.32776 0.32638 0.32504 0.32376 0.32254 0.32139 0.3203 0.31925 0.31836 0.31753 0.31678 0.31608 0.31546 0.3149 0.3144 0.31393 0.31351 0.31312 0.31276 0.31242 0.31209 0.31179 0.31148 0.31117 0.31086 0.31052 0.31013 0.30968 0.30917 0.30858 0.30791 0.30714 0.30627 0.30529 0.3042 0.303 0.30165 0.3002 0.29861 0.29691 0.29512 0.29318 0.29119 0.2891 0.28695 0.28478 0.28256 0.28032 0.2781 0.27587 0.27366 0.27144 0.26927 0.26712 0.265 0.26294 0.26087 0.25888 0.25691 0.25499 0.25313 0.25128 0.24952 0.2478 0.24614 0.24456 0.24304 0.24163 0.2403 0.23909 0.238 0.23704 0.23622 0.23554 0.23498 0.23455 0.23425 0.23414 0.23427 0.23467 0.23538 0.2365 0.23797 0.23988 0.2422 0.24489 0.24799 0.25127 0.25471 0.25807 0.26131 0.26435 0.26703 0.2694 0.27131 0.27286 0.27405 0.27491 0.27558 0.2761 0.27658 0.27704 0.2775 0.27797 0.27844 0.27886 0.27919 0.27941 0.27954 0.27959 0.27966 0.27983 0.28013 0.28064 0.28129 0.28209 0.28296 0.28381 0.28463 0.28532 0.28593 0.28642 0.28682 0.28714 0.28736 0.2875 0.28758 0.28761 0.28762 0.28759 0.28748 0.28724 0.28683 0.2862 0.2854 0.28438 0.28319 0.28183 0.28035 0.27878 0.27715 0.27547 0.27377 0.27212 0.27047 0.26891 0.26744 0.26604 0.26474 0.26355 0.26241 0.26133 0.26026 0.25917 0.25799 0.25678 0.25549 0.25412 0.2527 0.25122 0.24978 0.24818 0.24659 0.24501 0.24347 0.24206 0.24079 0.23974 0.23894 0.23844 0.23823 0.23831 0.23872 0.23947 0.24053 0.24202 0.24391 0.24621 0.2491 0.25248 0.25646 0.26105 0.26633 0.27243 0.27938 0.28757 0.29672 0.30706 0.3185 0.3309 0.34433 0.35836 0.37324 0.38825 0.40343 0.41832 0.43266 0.44648 0.45929 0.47134 0.48238 0.49249 0.50162 0.50969 0.51683 0.5228 0.5277 0.53147 0.53402 0.53533 0.53554 0.53474 0.5329 0.53029 0.52707 0.52334 0.51925 0.51496 0.51049 0.50601 0.50145 0.49695 0.49244 0.48801 0.48365 0.4793 0.47508 0.47081 0.46664 0.46249 0.45838 0.4543 0.45022 0.44623 0.44226 0.43844 0.43465 0.43104 0.4276 0.42434 0.42133 0.41852 0.41609 0.41395 0.4122 0.41082 0.40987 0.40931 0.40914 0.4094 0.41008 0.41115 0.41266 0.41457 0.41693 0.41969 0.42277 0.42622 0.42994 0.43399 0.43817 0.44254 0.44703 0.4516 0.45627 0.46092 0.4656 0.47018 0.47474 0.47908 0.48334 0.48736 0.49124 0.49492 0.49839 0.50175 0.50488 0.50789 0.51071 0.51341 0.51594 0.51832 0.52051 0.52256 0.52446 0.5262 0.5278 0.52919 0.5305 0.53164 0.53267 0.53356 0.53429 0.53487 0.53526 0.5355 0.53554 0.53539 0.53513 0.53471 0.5341 0.53338 0.53244 0.53135 0.53006 0.52865 0.52697 0.52516 0.5232 0.52119 0.51907 0.51698 0.5149 0.51283 0.51072 0.50857 0.50635 0.50401 0.50162 0.49916 0.49669 0.49415 0.49163 0.48912 0.48663 0.48414 0.48162 0.47911 0.47657 0.47404 0.47143 0.46888 0.46628 0.46373 0.46122 0.45876 0.45629 0.45393 0.45158 0.44926 0.44699 0.44476 0.44261 0.44046 0.43835 0.43626 0.43426 0.4323 0.43044 0.42868 0.42705 0.42554 0.42419 0.42305 0.42215 0.42152 0.42121 0.42128 0.42179 0.42273 0.42418 0.42611 0.42865 0.43172 0.43541 0.43957 0.44436 0.44956 0.45529 0.46124 0.46758 0.47402 0.48062 0.48712 0.49362 0.50008 0.50647 0.51287 0.51927 0.52581 0.53231 0.53874 0.54463 0.5499 0.55395 0.55678 0.55831 0.5588 0.55867 0.55844 0.55848 0.55908 0.56039 0.56237 0.56481 0.56749 0.56998 0.57211 0.57355 0.57434 0.57462 0.57454 0.57422 0.57377 0.57317 0.57246 0.57161 0.57066 0.56961 0.5686 0.56765 0.56693 0.56634 0.56591 0.56552 0.56499 0.56411 0.56285 0.56128 0.55956 0.5579 0.55661 0.55569 0.55513 0.55488 0.55484 0.55486 0.55484 0.5548 0.55469 0.55453 0.55422 0.55388 0.55357 0.55325 0.55314 0.55322 0.5535 0.5541 0.555 0.55621 0.55785 0.5598 0.56217 0.56485 0.56789 0.57122 0.57473 0.57832 0.58204 0.58576 0.58954 0.5933 0.59709 0.60082 0.60459 0.60831 0.6122 0.6161 0.62012 0.62415 0.62851 0.63286 0.63741 0.64182 0.64626 0.65059 0.65484 0.6589 0.66288 0.66674 0.67048 0.67421 0.67782 0.68129 0.68469 0.68805 0.6912 0.69425 0.69713 0.69985 0.70222 0.70439 0.70626 0.70787 0.70911 0.71008 0.71083 0.71108 0.71106 0.71085 0.71045 0.70974
-0.023895 -0.023973 -0.024026 -0.024046 -0.024038 -0.023986 -0.023856 -0.023673 -0.023379 -0.023002 -0.022457 -0.021763 -0.02087 -0.019754 -0.01838 -0.016721 -0.014806 -0.012629 -0.010133 -0.0074467 -0.0045498 -0.0014429 0.0018161 0.005217 0.0086642 0.012145 0.015695 0.019168 0.022561 0.025919 0.029134 0.032204 0.035147 0.037914 0.040594 0.04312 0.045586 0.048029 0.050414 0.052795 0.055168 0.057506 0.059822 0.061983 0.064027 0.065908 0.067577 0.068969 0.070134 0.071022 0.071678 0.072021 0.072112 0.07191 0.071442 0.070663 0.069624 0.068303 0.066753 0.065034 0.0632 0.061254 0.059311 0.05739 0.055524 0.053754 0.05206 0.050517 0.049098 0.047806 0.046652 0.04563 0.044712 0.043921 0.04322 0.042623 0.042097 0.041627 0.041211 0.040857 0.040517 0.040198 0.039897 0.039599 0.039297 0.038976 0.038641 0.03827 0.03787 0.037442 0.036996 0.036531 0.036069 0.035597 0.035166 0.034763 0.034397 0.0341 0.033866 0.033717 0.033642 0.033667 0.033772 0.033996 0.034327 0.034784 0.035376 0.036088 0.036939 0.037958 0.039119 0.040446 0.041945 0.043591 0.045453 0.047436 0.049603 0.051929 0.054385 0.057011 0.059719 0.06251 0.06544 0.068387 0.071402 0.074433 0.07744 0.080496 0.083426 0.086283 0.089078 0.091724 0.094276 0.096708 0.099034 0.10135 0.10357 0.1058 0.10807 0.11044 0.11302 0.1158 0.11886 0.12237 0.12619 0.13047 0.13515 0.14022 0.14584 0.15189 0.1585 0.16563 0.17321 0.18133 0.18972 0.19836 0.20739 0.21637 0.22543 0.23437 0.24309 0.25169 0.25981 0.2675 0.27478 0.28139 0.28756 0.29294 0.29772 0.30192 0.30549 0.30853 0.31106 0.31321 0.31504 0.31656 0.31782 0.3189 0.31978 0.32053 0.32111 0.32156 0.32187 0.32203 0.32205 0.32189 0.3216 0.32115 0.32059 0.31991 0.31915 0.31832 0.31743 0.31648 0.31548 0.31444 0.31331 0.31214 0.31092 0.30966 0.30837 0.30706 0.30567 0.30431 0.30295 0.30157 0.30021 0.29887 0.29757 0.29632 0.2951 0.29394 0.29284 0.2918 0.29076 0.28986 0.28905 0.2883 0.28761 0.28702 0.28646 0.28595 0.28549 0.28507 0.28467 0.28428 0.28394 0.28361 0.2833 0.283 0.2827 0.28239 0.28206 0.28169 0.28127 0.28078 0.28023 0.2796 0.27885 0.27803 0.27709 0.27604 0.2749 0.27362 0.27225 0.27074 0.26915 0.26745 0.26561 0.26374 0.26177 0.25974 0.25771 0.25561 0.25351 0.25142 0.24932 0.24725 0.24516 0.24312 0.24112 0.23914 0.2372 0.23527 0.23341 0.23156 0.22977 0.22803 0.2263 0.22466 0.22306 0.22152 0.22006 0.21865 0.21733 0.21612 0.21501 0.21402 0.21316 0.21243 0.21184 0.21136 0.21099 0.21076 0.2107 0.21085 0.21127 0.21197 0.21306 0.21449 0.21634 0.21858 0.22117 0.22416 0.22731 0.23062 0.23387 0.23699 0.23994 0.24255 0.24487 0.24677 0.24831 0.24951 0.25037 0.25105 0.25156 0.25203 0.25246 0.25288 0.25332 0.25374 0.25409 0.25438 0.25454 0.25461 0.25461 0.2546 0.25469 0.2549 0.25532 0.25589 0.25661 0.25741 0.25821 0.25897 0.25962 0.26019 0.26064 0.261 0.26129 0.26146 0.26155 0.26157 0.26154 0.26148 0.26138 0.26121 0.26094 0.2605 0.25988 0.25909 0.25812 0.25698 0.25569 0.25431 0.25283 0.25129 0.24972 0.24811 0.24655 0.24501 0.24355 0.24215 0.24084 0.23964 0.23851 0.23745 0.23644 0.23544 0.23441 0.23332 0.23217 0.23097 0.22968 0.22837 0.22699 0.22565 0.22418 0.2227 0.22121 0.21979 0.21848 0.2173 0.21631 0.21557 0.21511 0.21491 0.21499 0.21539 0.21609 0.2171 0.21848 0.22025 0.22241 0.22512 0.22829 0.23204 0.23635 0.24133 0.24711 0.25368 0.26141 0.27004 0.27979 0.29063 0.3024 0.31516 0.32845 0.34263 0.35691 0.37139 0.3856 0.3993 0.41253 0.42478 0.43639 0.44699 0.45669 0.46544 0.4732 0.48009 0.48582 0.49058 0.4942 0.49669 0.49801 0.49826 0.49751 0.49582 0.49338 0.49033 0.48678 0.48293 0.47889 0.47464 0.47037 0.46603 0.46176 0.45749 0.45331 0.44918 0.44508 0.44111 0.43711 0.43318 0.42925 0.42535 0.42151 0.41766 0.41388 0.4101 0.40644 0.40284 0.3994 0.39611 0.39297 0.39007 0.38738 0.38501 0.38295 0.38123 0.37984 0.37889 0.37829 0.37807 0.37824 0.37882 0.37978 0.38116 0.38293 0.38511 0.38766 0.39057 0.39383 0.39733 0.40115 0.40511 0.40926 0.41351 0.41785 0.42229 0.4267 0.43118 0.43553 0.43986 0.44399 0.44799 0.45178 0.45537 0.45879 0.46199 0.46509 0.46796 0.47072 0.47333 0.4758 0.47811 0.48028 0.48233 0.4842 0.48598 0.4876 0.48907 0.49041 0.49163 0.49271 0.49368 0.4945 0.49521 0.49576 0.49614 0.49638 0.49644 0.49637 0.49614 0.49576 0.49525 0.49458 0.49376 0.49277 0.49161 0.49029 0.48873 0.4871 0.48528 0.48346 0.48156 0.47964 0.47774 0.47585 0.47394 0.47195 0.46989 0.46774 0.46556 0.46325 0.46099 0.45865 0.45635 0.45405 0.45176 0.44948 0.4472 0.44489 0.44254 0.44022 0.43779 0.4354 0.43295 0.43055 0.42814 0.42584 0.42345 0.42117 0.41893 0.41673 0.41459 0.41246 0.41039 0.40831 0.40631 0.40434 0.40244 0.40058 0.39883 0.39713 0.39554 0.39408 0.39276 0.39165 0.39075 0.39012 0.38984 0.38988 0.39033 0.3912 0.39257 0.39442 0.39681 0.39971 0.40319 0.40718 0.41172 0.4167 0.42215 0.42791 0.43401 0.44023 0.44657 0.45285 0.45913 0.46532 0.47152 0.47764 0.48379 0.49007 0.49622 0.5023 0.50795 0.51291 0.51677 0.51949 0.52094 0.52145 0.5214 0.52125 0.52134 0.52197 0.52324 0.5252 0.52754 0.53013 0.53254 0.53452 0.53583 0.53653 0.5367 0.53648 0.53611 0.53561 0.535 0.53431 0.53354 0.53264 0.53168 0.53074 0.52995 0.52931 0.52888 0.52851 0.52822 0.52775 0.52696 0.52579 0.52428 0.52262 0.52104 0.51977 0.51884 0.51828 0.51802 0.51794 0.51788 0.51787 0.51781 0.51771 0.51758 0.51729 0.51701 0.51671 0.51647 0.51642 0.51653 0.51684 0.51738 0.51822 0.51938 0.5209 0.5227 0.52494 0.52747 0.5303 0.53331 0.5366 0.53995 0.54345 0.54699 0.55054 0.5541 0.55766 0.56117 0.56477 0.56832 0.57197 0.57565 0.5795 0.58342 0.58753 0.5917 0.59602 0.60018 0.6044 0.60847 0.61256 0.61643 0.62031 0.62399 0.6276 0.63119 0.63465 0.63805 0.64128 0.64446 0.64748 0.65041 0.65319 0.65569 0.65792 0.65999 0.66177 0.66326 0.66444 0.66543 0.66601 0.66637 0.66641 0.66616 0.66579 0.66519
-0.019526 -0.019615 -0.019672 -0.019681 -0.019661 -0.019581 -0.019431 -0.019207 -0.018882 -0.018458 -0.017849 -0.017085 -0.01609 -0.014863 -0.01335 -0.011536 -0.009437 -0.0070497 -0.0043365 -0.0014113 0.0017471 0.0051248 0.0086741 0.012379 0.016134 0.019907 0.023761 0.027525 0.031203 0.034834 0.038311 0.041646 0.044833 0.047828 0.050741 0.053483 0.056155 0.0588 0.061377 0.063942 0.066492 0.069002 0.071483 0.073784 0.075969 0.077972 0.079742 0.081226 0.082462 0.083399 0.084079 0.084422 0.084503 0.084265 0.08374 0.082886 0.081765 0.080356 0.0787 0.076872 0.074931 0.072869 0.070814 0.068774 0.066802 0.064917 0.063113 0.061473 0.059959 0.05858 0.057343 0.056243 0.055262 0.054413 0.053659 0.05301 0.052449 0.051942 0.051496 0.051118 0.050747 0.050405 0.050075 0.049755 0.049427 0.049075 0.048717 0.048316 0.047885 0.04742 0.046931 0.046428 0.045925 0.045423 0.044952 0.044519 0.044128 0.043807 0.043559 0.043405 0.043333 0.04337 0.043495 0.043756 0.044134 0.044645 0.045305 0.046102 0.047054 0.048181 0.049467 0.050937 0.052585 0.054404 0.056455 0.058639 0.061024 0.063575 0.066266 0.069136 0.072093 0.075136 0.078338 0.081549 0.084813 0.088092 0.091348 0.09465 0.097808 0.10089 0.1039 0.10675 0.10951 0.11213 0.11464 0.11714 0.11955 0.12196 0.12442 0.12699 0.12979 0.13283 0.13618 0.14002 0.14419 0.14884 0.15396 0.15955 0.16577 0.17237 0.17956 0.18729 0.19547 0.2042 0.21319 0.22241 0.23202 0.24154 0.25113 0.26055 0.2697 0.27872 0.28718 0.29516 0.30271 0.30954 0.3159 0.32144 0.32637 0.33069 0.33437 0.33752 0.34017 0.3424 0.34432 0.34591 0.34723 0.34836 0.34926 0.35004 0.35064 0.3511 0.35141 0.35155 0.35155 0.35138 0.35107 0.35059 0.35 0.34929 0.3485 0.34764 0.34669 0.34569 0.34463 0.34353 0.34234 0.34109 0.33977 0.33845 0.3371 0.33576 0.33432 0.33291 0.33148 0.33004 0.32862 0.32722 0.32585 0.32453 0.32324 0.32202 0.32086 0.31976 0.31869 0.31779 0.31695 0.31618 0.31546 0.31482 0.31425 0.31371 0.31322 0.31276 0.31234 0.31195 0.31157 0.31123 0.31089 0.31056 0.31022 0.30989 0.30953 0.30912 0.30867 0.30814 0.30754 0.30687 0.30608 0.30521 0.30422 0.30311 0.30193 0.30057 0.29913 0.29755 0.29588 0.2941 0.29218 0.29021 0.28814 0.28603 0.28389 0.28169 0.2795 0.2773 0.2751 0.27293 0.27074 0.2686 0.26649 0.26441 0.26238 0.26035 0.25838 0.25645 0.25456 0.25273 0.25092 0.24919 0.24751 0.24589 0.24435 0.24287 0.24149 0.24023 0.23907 0.23805 0.23715 0.23641 0.2358 0.23532 0.23497 0.23475 0.2347 0.23489 0.23536 0.23612 0.23727 0.23877 0.24071 0.24302 0.2457 0.2488 0.25205 0.25548 0.25883 0.26205 0.26507 0.26774 0.27009 0.272 0.27352 0.27471 0.27555 0.27622 0.27675 0.27723 0.27769 0.27816 0.27865 0.2791 0.27952 0.27986 0.2801 0.28024 0.28029 0.28036 0.28052 0.28081 0.28128 0.28192 0.28269 0.28351 0.28434 0.28511 0.28576 0.28634 0.28678 0.28714 0.28744 0.28764 0.28775 0.28782 0.28783 0.28781 0.28777 0.28765 0.28741 0.28701 0.2864 0.28562 0.28464 0.28349 0.28219 0.28078 0.27927 0.27768 0.27608 0.27443 0.27282 0.27124 0.26973 0.26831 0.26696 0.26572 0.26455 0.26346 0.26242 0.26137 0.26031 0.25917 0.25799 0.25673 0.25541 0.25402 0.2526 0.2512 0.24966 0.24813 0.24658 0.2451 0.24374 0.24253 0.24153 0.24078 0.24033 0.24016 0.2403 0.24076 0.24155 0.24268 0.2442 0.24614 0.24849 0.25143 0.25488 0.25896 0.26361 0.269 0.27518 0.28223 0.29051 0.29975 0.31015 0.32165 0.33407 0.34749 0.36144 0.37622 0.3911 0.40613 0.42083 0.43495 0.44853 0.46107 0.47287 0.48364 0.49351 0.50235 0.51017 0.51711 0.52286 0.52761 0.53124 0.53368 0.53497 0.53521 0.53443 0.53271 0.53024 0.52721 0.52366 0.51975 0.51568 0.5114 0.50709 0.50271 0.49836 0.49405 0.4898 0.48559 0.48141 0.47735 0.47327 0.46925 0.46526 0.46129 0.45734 0.45338 0.44952 0.44562 0.44186 0.43813 0.43458 0.43119 0.42793 0.42493 0.42213 0.41963 0.41744 0.4156 0.41411 0.41302 0.41234 0.41199 0.41208 0.41258 0.4135 0.41481 0.41654 0.41866 0.42116 0.42406 0.42728 0.43074 0.43452 0.43843 0.44256 0.44679 0.45109 0.45547 0.45982 0.46423 0.46852 0.47279 0.47685 0.48081 0.48455 0.48808 0.49146 0.4946 0.49762 0.50043 0.50314 0.50564 0.50806 0.51032 0.51242 0.51441 0.51626 0.51801 0.51957 0.52102 0.52232 0.52354 0.52459 0.52558 0.52641 0.52709 0.52763 0.52802 0.52827 0.52833 0.52826 0.52805 0.52768 0.52716 0.5265 0.52569 0.5247 0.52351 0.52219 0.52067 0.51898 0.51718 0.51535 0.51342 0.51154 0.50968 0.50781 0.50592 0.50394 0.50192 0.49978 0.49763 0.49536 0.4931 0.49079 0.48853 0.48626 0.48401 0.48173 0.47943 0.47713 0.47477 0.47245 0.47001 0.46762 0.46514 0.46274 0.46032 0.45796 0.4556 0.45331 0.45105 0.44883 0.44664 0.44451 0.44245 0.44035 0.43836 0.43633 0.43441 0.43251 0.43071 0.42901 0.42737 0.42593 0.42458 0.42347 0.42261 0.422 0.4217 0.42178 0.42229 0.42323 0.42468 0.42665 0.42911 0.43211 0.43567 0.43974 0.44438 0.4494 0.45489 0.46068 0.46676 0.47295 0.4793 0.48558 0.49183 0.49799 0.50412 0.5102 0.51629 0.5225 0.52859 0.53468 0.54029 0.54527 0.54912 0.55179 0.55327 0.55376 0.55372 0.55358 0.55369 0.55436 0.55563 0.55754 0.5599 0.56245 0.56485 0.56685 0.56818 0.56888 0.56908 0.5689 0.56861 0.56816 0.56763 0.56698 0.56629 0.56545 0.56457 0.56368 0.56291 0.56233 0.56191 0.56159 0.56129 0.56086 0.56011 0.55899 0.55754 0.55593 0.55436 0.55314 0.55227 0.55171 0.5515 0.5514 0.55139 0.5514 0.55137 0.55128 0.55121 0.55092 0.55064 0.55037 0.55017 0.55008 0.5502 0.55051 0.55107 0.55188 0.553 0.55451 0.55637 0.55856 0.56106 0.56388 0.56692 0.57015 0.57345 0.5769 0.58032 0.58385 0.58731 0.59085 0.5943 0.59787 0.60132 0.60496 0.60857 0.61239 0.61621 0.62019 0.62429 0.62853 0.63267 0.63679 0.64084 0.64489 0.64869 0.65255 0.65616 0.65973 0.66326 0.66665 0.66992 0.67309 0.6762 0.67921 0.68203 0.68471 0.6872 0.6894 0.69139 0.6931 0.69458 0.69575 0.69667 0.69741 0.69776 0.69782 0.69767 0.69726 0.69666
-0.021477 -0.021566 -0.021621 -0.021634 -0.021613 -0.021537 -0.021396 -0.021189 -0.020854 -0.02043 -0.019821 -0.019063 -0.01807 -0.016852 -0.015329 -0.013515 -0.011414 -0.0090161 -0.0062912 -0.00336 -0.0001872 0.003202 0.006762 0.010471 0.01424 0.018033 0.021901 0.025672 0.029358 0.033 0.036493 0.039836 0.043025 0.046042 0.048958 0.051716 0.054412 0.057067 0.059656 0.062233 0.064792 0.067321 0.069815 0.072127 0.074324 0.076337 0.078121 0.079611 0.080849 0.081797 0.082481 0.08283 0.082907 0.082664 0.08214 0.081284 0.080165 0.078754 0.077095 0.075267 0.073326 0.071263 0.06921 0.067168 0.065186 0.063306 0.061499 0.059854 0.058333 0.056947 0.055702 0.054598 0.053607 0.052757 0.052 0.051352 0.050782 0.05027 0.049827 0.049437 0.049057 0.048716 0.048385 0.048059 0.047727 0.047368 0.047004 0.046597 0.046156 0.045691 0.045192 0.044678 0.044171 0.043656 0.043177 0.04274 0.042337 0.042014 0.041754 0.041596 0.041521 0.041554 0.041678 0.041936 0.042313 0.042822 0.043485 0.044284 0.045238 0.046377 0.047673 0.049158 0.050821 0.052654 0.054723 0.056923 0.059335 0.061916 0.064635 0.067529 0.070524 0.073605 0.076837 0.080083 0.083386 0.086705 0.089992 0.093328 0.096517 0.099629 0.10267 0.10555 0.10834 0.11098 0.11352 0.11604 0.11847 0.1209 0.12338 0.12597 0.1288 0.13186 0.13524 0.13912 0.14334 0.14805 0.15323 0.1589 0.1652 0.17189 0.17917 0.18702 0.1953 0.20416 0.21327 0.22262 0.23236 0.24204 0.25177 0.26132 0.2706 0.27975 0.28833 0.29645 0.30408 0.311 0.31744 0.32304 0.32803 0.33239 0.3361 0.33929 0.34197 0.34422 0.34614 0.34773 0.34905 0.35017 0.35108 0.35184 0.35243 0.35288 0.35318 0.35331 0.35331 0.35312 0.35279 0.3523 0.35169 0.35096 0.35015 0.34927 0.3483 0.34728 0.34619 0.34505 0.34386 0.3426 0.34124 0.33989 0.33852 0.33715 0.3357 0.33425 0.33281 0.33135 0.32992 0.3285 0.3271 0.32576 0.32445 0.32321 0.32204 0.32093 0.31984 0.31893 0.31809 0.31731 0.31659 0.31596 0.31537 0.31484 0.31435 0.31389 0.31347 0.31308 0.31272 0.31236 0.31203 0.31169 0.31135 0.31101 0.31065 0.31024 0.30978 0.30925 0.30865 0.30796 0.30716 0.30628 0.30528 0.30417 0.30297 0.30161 0.30014 0.29854 0.29684 0.29504 0.2931 0.2911 0.28901 0.28686 0.28469 0.28246 0.28024 0.27801 0.27578 0.27358 0.27137 0.26919 0.26705 0.26494 0.26289 0.26083 0.25884 0.25688 0.25497 0.25311 0.25128 0.24953 0.24783 0.24618 0.24463 0.24313 0.24173 0.24044 0.23927 0.23822 0.23731 0.23655 0.23593 0.23544 0.23507 0.23485 0.2348 0.23498 0.23544 0.2362 0.23736 0.23886 0.24081 0.24314 0.24583 0.24893 0.25222 0.25565 0.25901 0.26224 0.26527 0.26794 0.27029 0.27218 0.27369 0.27484 0.27568 0.27633 0.27684 0.27732 0.27777 0.27824 0.27873 0.2792 0.27962 0.27997 0.28021 0.28037 0.28045 0.28056 0.28075 0.28106 0.28156 0.28221 0.28299 0.28382 0.28466 0.28543 0.28608 0.28665 0.28709 0.28746 0.28776 0.28795 0.28808 0.28815 0.28819 0.2882 0.28818 0.28808 0.28785 0.28744 0.28684 0.28607 0.28508 0.28393 0.28262 0.28118 0.27966 0.27806 0.27643 0.27478 0.27315 0.27155 0.27004 0.26861 0.26724 0.26598 0.26481 0.2637 0.26265 0.26159 0.26053 0.25939 0.25819 0.2569 0.25557 0.25419 0.25273 0.25132 0.24976 0.24821 0.24665 0.24514 0.24377 0.24254 0.24153 0.24078 0.24032 0.24015 0.24028 0.24075 0.24155 0.24268 0.24421 0.24615 0.24852 0.25151 0.25499 0.25909 0.26379 0.26924 0.27548 0.28261 0.29097 0.30029 0.3108 0.32241 0.33496 0.34849 0.36259 0.37753 0.39252 0.40769 0.42256 0.43683 0.45052 0.46316 0.47511 0.48599 0.49595 0.50486 0.51278 0.51979 0.52559 0.53038 0.53404 0.53655 0.53782 0.53805 0.53725 0.5355 0.53297 0.52989 0.52627 0.52231 0.51815 0.5138 0.50943 0.505 0.50059 0.49621 0.49189 0.48764 0.48341 0.4793 0.47517 0.4711 0.46705 0.46305 0.45906 0.45505 0.45115 0.44719 0.44339 0.43962 0.43602 0.43258 0.42931 0.42627 0.42344 0.42096 0.41874 0.4169 0.41538 0.41431 0.41364 0.41331 0.41342 0.41395 0.4149 0.41626 0.41802 0.42022 0.42279 0.42571 0.429 0.43253 0.43637 0.44036 0.44455 0.44886 0.45323 0.45768 0.4621 0.46657 0.47093 0.47525 0.47939 0.48342 0.48722 0.49084 0.49427 0.49748 0.50055 0.50343 0.50618 0.50874 0.51121 0.51353 0.51569 0.51772 0.5196 0.52138 0.52298 0.52448 0.52579 0.52702 0.5281 0.52909 0.5299 0.53059 0.53116 0.53155 0.5318 0.53185 0.53178 0.53156 0.53118 0.53063 0.52997 0.52913 0.5281 0.5269 0.52556 0.52399 0.52228 0.52042 0.51858 0.51664 0.51469 0.51281 0.5109 0.50897 0.50694 0.50489 0.50273 0.50054 0.49822 0.49593 0.49358 0.49126 0.48896 0.48666 0.48434 0.48197 0.47963 0.47725 0.47483 0.47239 0.46997 0.46746 0.46502 0.46257 0.46018 0.45779 0.45546 0.45317 0.45096 0.44875 0.4466 0.44448 0.44237 0.44034 0.43829 0.43635 0.4344 0.43256 0.43082 0.42922 0.42769 0.42637 0.42522 0.4243 0.4237 0.42339 0.42349 0.424 0.42496 0.4264 0.42834 0.43086 0.43388 0.4375 0.44157 0.44626 0.45132 0.45688 0.4627 0.46886 0.47513 0.48152 0.48785 0.49418 0.5004 0.50659 0.51277 0.51896 0.52524 0.53148 0.5376 0.5433 0.54833 0.55222 0.55495 0.5564 0.55695 0.55686 0.55668 0.55676 0.55738 0.55868 0.56059 0.56295 0.56553 0.56794 0.56999 0.57138 0.57214 0.57234 0.57222 0.57189 0.57146 0.57096 0.57033 0.56955 0.56871 0.56779 0.5669 0.56612 0.56544 0.56498 0.56462 0.56431 0.56388 0.5631 0.56193 0.56048 0.55882 0.55729 0.55603 0.55515 0.55464 0.55439 0.5543 0.55434 0.55433 0.55432 0.5542 0.55407 0.55381 0.55352 0.55325 0.55306 0.55295 0.55305 0.55339 0.55397 0.55479 0.55595 0.55748 0.5594 0.56163 0.56419 0.56706 0.57012 0.57337 0.5768 0.58029 0.58384 0.58738 0.59097 0.59455 0.59811 0.6017 0.60526 0.60894 0.61267 0.61657 0.62046 0.62453 0.62875 0.633 0.63725 0.64148 0.64564 0.64978 0.65358 0.65753 0.66121 0.66482 0.6684 0.67189 0.67529 0.67848 0.6816 0.68471 0.68756 0.69033 0.69288 0.69519 0.69721 0.699 0.70049 0.70173 0.70267 0.70333 0.70371 0.70378 0.70354 0.7032 0.70255
-0.028119 -0.02821 -0.028266 -0.028275 -0.02826 -0.0282 -0.028059 -0.027866 -0.027569 -0.027174 -0.026626 -0.025941 -0.025027 -0.023907 -0.02252 -0.02087 -0.018933 -0.016736 -0.014215 -0.011508 -0.0085692 -0.0054133 -0.0020977 0.001365 0.004883 0.0084254 0.012039 0.015575 0.019027 0.022429 0.025675 0.028777 0.031737 0.034504 0.037186 0.039716 0.042185 0.044634 0.047027 0.049421 0.051818 0.05418 0.056532 0.058726 0.060818 0.062752 0.064479 0.065945 0.067178 0.068133 0.068853 0.069258 0.069403 0.069244 0.068811 0.068047 0.06702 0.065703 0.06413 0.062385 0.060515 0.05852 0.056533 0.054566 0.052654 0.05084 0.049107 0.047523 0.046073 0.044752 0.043565 0.042519 0.041578 0.040778 0.040061 0.039451 0.038913 0.038434 0.038011 0.037643 0.037288 0.03696 0.036647 0.036331 0.036017 0.035677 0.035331 0.034944 0.034535 0.034102 0.033644 0.033172 0.032706 0.032235 0.031797 0.031395 0.031033 0.030737 0.030505 0.03036 0.030293 0.030324 0.030434 0.030668 0.031014 0.031484 0.032088 0.032817 0.033691 0.034737 0.035925 0.037285 0.038818 0.040502 0.042402 0.044421 0.046634 0.049001 0.051508 0.05417 0.056921 0.059748 0.062718 0.065706 0.068751 0.071812 0.074855 0.077946 0.080896 0.083783 0.086602 0.089276 0.091867 0.094328 0.096682 0.099029 0.10129 0.10355 0.10586 0.10828 0.1109 0.11375 0.11689 0.12048 0.12439 0.12878 0.13357 0.13877 0.14456 0.15075 0.15751 0.16483 0.1726 0.18093 0.18954 0.19839 0.20766 0.21687 0.22617 0.23533 0.24425 0.25308 0.26138 0.26924 0.27668 0.28342 0.28972 0.29519 0.30008 0.30437 0.30803 0.31117 0.31381 0.31603 0.31793 0.31949 0.32078 0.32188 0.32275 0.3235 0.32408 0.32451 0.3248 0.32493 0.32491 0.32473 0.32439 0.3239 0.3233 0.32257 0.32177 0.3209 0.31995 0.31894 0.31788 0.31677 0.31561 0.31435 0.31309 0.31178 0.3104 0.30904 0.3076 0.30616 0.30473 0.30327 0.30186 0.30045 0.29908 0.29778 0.2965 0.29531 0.29419 0.29312 0.29205 0.29114 0.29032 0.28958 0.2889 0.28831 0.28776 0.28728 0.28682 0.2864 0.28603 0.28566 0.28533 0.28502 0.28471 0.28442 0.28413 0.28381 0.28348 0.2831 0.28267 0.28217 0.28159 0.28094 0.28018 0.27934 0.27838 0.27731 0.27615 0.27483 0.27343 0.27189 0.27025 0.26852 0.26664 0.26472 0.2627 0.26064 0.25854 0.25638 0.25424 0.25209 0.24993 0.24781 0.24566 0.24357 0.24149 0.23946 0.23747 0.23549 0.23357 0.23168 0.22984 0.22805 0.22628 0.22458 0.22293 0.22135 0.21984 0.21839 0.21703 0.21578 0.21463 0.21361 0.2127 0.21193 0.21129 0.21077 0.21037 0.21009 0.20997 0.21008 0.21045 0.2111 0.21215 0.21354 0.21536 0.21757 0.22014 0.22313 0.22631 0.22966 0.23297 0.23617 0.23919 0.24189 0.24429 0.24624 0.24782 0.24905 0.24994 0.25062 0.25114 0.2516 0.25203 0.25245 0.25288 0.2533 0.25365 0.25393 0.25411 0.25417 0.25415 0.25413 0.2542 0.25441 0.25485 0.25546 0.25622 0.25707 0.25793 0.25876 0.25946 0.26008 0.26059 0.26101 0.26133 0.26155 0.26166 0.26172 0.26171 0.26169 0.26163 0.26148 0.26122 0.2608 0.26018 0.25939 0.2584 0.25725 0.25593 0.25452 0.253 0.25143 0.24983 0.24819 0.2466 0.24502 0.24353 0.24213 0.2408 0.23957 0.23841 0.23734 0.2363 0.23528 0.23422 0.23311 0.23194 0.2307 0.22941 0.22807 0.22666 0.22529 0.22379 0.22228 0.22077 0.21931 0.21799 0.21678 0.21579 0.21504 0.21457 0.21438 0.21448 0.21488 0.21561 0.21664 0.21809 0.21992 0.22214 0.22493 0.22821 0.23207 0.23652 0.24168 0.24764 0.25441 0.2624 0.27128 0.28137 0.29255 0.3047 0.31786 0.33166 0.34629 0.36106 0.37606 0.39077 0.40499 0.4187 0.43141 0.44343 0.45443 0.46452 0.4736 0.48166 0.48885 0.4948 0.49972 0.50349 0.50605 0.5074 0.50763 0.50682 0.505 0.5024 0.49921 0.49548 0.49142 0.48715 0.48267 0.47817 0.4736 0.46911 0.46459 0.46016 0.4558 0.45146 0.44719 0.44293 0.43877 0.4346 0.43049 0.42642 0.42235 0.41839 0.41439 0.41054 0.40677 0.40315 0.39971 0.39644 0.39341 0.39059 0.38813 0.38595 0.38413 0.38268 0.38164 0.38098 0.38072 0.38087 0.38145 0.38243 0.38383 0.38563 0.38788 0.3905 0.39347 0.3968 0.40037 0.40427 0.40829 0.41252 0.41685 0.42127 0.42575 0.43023 0.43478 0.43919 0.44361 0.44782 0.45196 0.45588 0.45961 0.4632 0.46655 0.4698 0.47281 0.47575 0.47849 0.48113 0.48359 0.48592 0.4881 0.49015 0.49205 0.49379 0.49539 0.49684 0.49816 0.49937 0.50042 0.50131 0.50204 0.50265 0.50309 0.50336 0.50349 0.50342 0.50318 0.50279 0.50227 0.50155 0.50068 0.49961 0.49838 0.49698 0.49536 0.49358 0.49166 0.48972 0.48766 0.4856 0.48356 0.48154 0.47946 0.47735 0.47511 0.47276 0.4704 0.46793 0.46549 0.46298 0.46053 0.45806 0.45559 0.45315 0.45067 0.44823 0.44573 0.44327 0.44072 0.4382 0.43563 0.43311 0.43056 0.4281 0.42562 0.42324 0.42088 0.41859 0.41635 0.41413 0.41198 0.40981 0.40774 0.40568 0.40369 0.40175 0.39991 0.39814 0.39654 0.39504 0.39371 0.39255 0.39166 0.39102 0.39072 0.39075 0.39123 0.39214 0.39352 0.39538 0.39785 0.40081 0.40436 0.40842 0.41308 0.41818 0.42376 0.42969 0.43599 0.44238 0.44893 0.45548 0.46198 0.46844 0.47488 0.48125 0.4877 0.49425 0.50072 0.50714 0.51304 0.51831 0.52237 0.52519 0.52666 0.52717 0.52704 0.5268 0.52684 0.52749 0.5288 0.53082 0.53326 0.536 0.53849 0.54063 0.54204 0.54279 0.54297 0.5428 0.54244 0.54195 0.54132 0.54059 0.53976 0.53882 0.5378 0.53681 0.53593 0.53524 0.53472 0.53433 0.53399 0.53351 0.5327 0.53147 0.52991 0.52821 0.52658 0.52524 0.52432 0.52376 0.52349 0.52345 0.52344 0.52347 0.52343 0.52334 0.52321 0.52293 0.52265 0.52233 0.52213 0.52202 0.5221 0.52241 0.52299 0.52387 0.52509 0.52665 0.52855 0.53086 0.53349 0.53647 0.53968 0.54308 0.54659 0.55021 0.55383 0.55751 0.56124 0.56493 0.56856 0.57233 0.57601 0.57983 0.58366 0.58769 0.59183 0.59614 0.60046 0.60485 0.60921 0.61357 0.61784 0.62205 0.62612 0.63012 0.63391 0.63768 0.64136 0.64495 0.64846 0.65186 0.65512 0.65828 0.66134 0.66408 0.66683 0.66921 0.6713 0.67311 0.67467 0.67588 0.6769 0.67757 0.67795 0.67798 0.6778 0.67738 0.67671
-0.026591 -0.026697 -0.026766 -0.026786 -0.026778 -0.026726 -0.026589 -0.0264 -0.026098 -0.025701 -0.02514 -0.024427 -0.023487 -0.022331 -0.020884 -0.019168 -0.01715 -0.014854 -0.012219 -0.0093848 -0.0063094 -0.0030199 0.000439 0.0040477 0.0077025 0.011384 0.015134 0.018794 0.02236 0.025875 0.029232 0.032437 0.035501 0.038383 0.041171 0.043806 0.046378 0.048922 0.051411 0.053879 0.056344 0.058771 0.061175 0.06342 0.06555 0.067517 0.069258 0.070727 0.071955 0.072904 0.073603 0.073974 0.074085 0.073882 0.073398 0.072593 0.071511 0.07015 0.068544 0.066771 0.064873 0.062857 0.060849 0.058861 0.056929 0.055091 0.053333 0.051732 0.05026 0.048911 0.04771 0.046648 0.045691 0.044872 0.044143 0.043524 0.042976 0.042485 0.042055 0.041682 0.041317 0.04098 0.040659 0.040338 0.040013 0.03966 0.039301 0.038907 0.038483 0.038037 0.037558 0.037073 0.036595 0.036112 0.035661 0.035251 0.034878 0.034577 0.034336 0.03419 0.034128 0.034167 0.034297 0.034552 0.034916 0.035413 0.036055 0.036827 0.037743 0.038839 0.040086 0.041512 0.043115 0.044867 0.046852 0.048963 0.051264 0.053726 0.056326 0.059091 0.061938 0.064869 0.067939 0.071029 0.074167 0.077325 0.080453 0.083624 0.086661 0.089631 0.092537 0.095289 0.097944 0.10048 0.10289 0.1053 0.10763 0.10996 0.11234 0.11484 0.11755 0.12049 0.12374 0.12747 0.13153 0.13608 0.14104 0.14639 0.15243 0.15885 0.16583 0.17337 0.18135 0.18989 0.19867 0.20771 0.21714 0.22649 0.23593 0.24522 0.25425 0.26315 0.27152 0.27945 0.28692 0.29368 0.3 0.30548 0.31038 0.31467 0.31834 0.32149 0.32414 0.32637 0.32827 0.32984 0.33111 0.33221 0.33309 0.33386 0.33443 0.33488 0.33517 0.3353 0.33527 0.33507 0.33473 0.33422 0.33361 0.33288 0.33206 0.33119 0.33024 0.32924 0.32817 0.32705 0.32588 0.32465 0.32338 0.32205 0.32064 0.31931 0.31786 0.3164 0.31495 0.31347 0.31203 0.31058 0.30918 0.30782 0.30648 0.30523 0.30409 0.30299 0.30189 0.30093 0.30007 0.29929 0.29857 0.29793 0.29734 0.29682 0.29635 0.2959 0.2955 0.2951 0.29474 0.2944 0.29408 0.29376 0.29343 0.29309 0.29274 0.29235 0.29191 0.29139 0.29079 0.29013 0.28935 0.28849 0.28752 0.28642 0.28525 0.28392 0.28251 0.28095 0.27929 0.27754 0.27565 0.27371 0.27168 0.26959 0.26749 0.26532 0.26315 0.26098 0.25881 0.25667 0.25451 0.2524 0.25031 0.24826 0.24626 0.24425 0.2423 0.24039 0.23853 0.23672 0.23493 0.23321 0.23155 0.22994 0.22842 0.22694 0.22556 0.22429 0.22312 0.22207 0.22115 0.22036 0.21971 0.21918 0.21877 0.2185 0.21838 0.21851 0.2189 0.21958 0.22065 0.22207 0.22392 0.22617 0.22879 0.23181 0.23502 0.23839 0.24172 0.24493 0.24795 0.25062 0.25301 0.25494 0.25651 0.25772 0.2586 0.25929 0.25982 0.2603 0.26075 0.2612 0.26166 0.26211 0.2625 0.26282 0.26303 0.26314 0.26317 0.26319 0.2633 0.26355 0.264 0.26464 0.26542 0.26626 0.2671 0.2679 0.2686 0.26921 0.26971 0.27011 0.27044 0.27065 0.27078 0.27085 0.27088 0.27087 0.27082 0.27069 0.27044 0.27001 0.26941 0.2686 0.26761 0.26645 0.26513 0.26369 0.26216 0.26056 0.25895 0.2573 0.25568 0.2541 0.25258 0.25115 0.24979 0.24855 0.24738 0.24628 0.24524 0.24419 0.24312 0.24199 0.2408 0.23953 0.23821 0.23684 0.23542 0.23403 0.23251 0.23097 0.22945 0.22798 0.22664 0.22542 0.22442 0.22367 0.22321 0.22303 0.22314 0.22358 0.22433 0.22541 0.22688 0.22877 0.23107 0.23396 0.23734 0.24132 0.24588 0.25116 0.25726 0.26418 0.27229 0.28134 0.29161 0.30295 0.31525 0.32851 0.34241 0.35711 0.37198 0.38697 0.40167 0.41583 0.42946 0.44209 0.45402 0.46491 0.47485 0.48386 0.49183 0.49889 0.50477 0.50959 0.51328 0.51582 0.51714 0.51738 0.5166 0.51484 0.51227 0.50917 0.50549 0.50152 0.49733 0.49295 0.48852 0.48403 0.47957 0.47513 0.47078 0.46648 0.46218 0.45801 0.4538 0.44968 0.44556 0.4415 0.43748 0.43344 0.42951 0.42554 0.42173 0.41796 0.41435 0.41091 0.40762 0.40458 0.40176 0.39929 0.39707 0.39524 0.39376 0.39266 0.39197 0.39166 0.39175 0.39227 0.39318 0.39453 0.39626 0.39842 0.40097 0.40387 0.40712 0.41061 0.4144 0.41832 0.42248 0.42672 0.43105 0.43546 0.43986 0.44429 0.44863 0.45294 0.45705 0.46109 0.4649 0.46852 0.47197 0.47523 0.47838 0.4813 0.48411 0.48676 0.48926 0.49162 0.49386 0.49594 0.49787 0.49971 0.50139 0.5029 0.50429 0.50557 0.50671 0.50772 0.50856 0.50932 0.50987 0.51028 0.51055 0.51062 0.51054 0.51032 0.50995 0.50941 0.50871 0.50784 0.50682 0.50558 0.50419 0.5026 0.50084 0.49892 0.497 0.49502 0.49302 0.49105 0.48907 0.48707 0.48494 0.48282 0.48055 0.47825 0.47586 0.47346 0.47102 0.46859 0.4662 0.46379 0.46142 0.45901 0.45663 0.45418 0.45174 0.44925 0.44678 0.44425 0.44175 0.43924 0.43683 0.4344 0.43202 0.42972 0.42746 0.42522 0.42306 0.42092 0.41878 0.41672 0.41466 0.4127 0.41078 0.40896 0.40721 0.40561 0.40411 0.40279 0.40163 0.40075 0.40013 0.39982 0.3999 0.40036 0.40127 0.40269 0.40461 0.40704 0.40998 0.41355 0.41758 0.42221 0.42727 0.43282 0.43867 0.44486 0.4512 0.45764 0.46407 0.47049 0.4768 0.4831 0.48937 0.49567 0.50209 0.50844 0.51468 0.52047 0.52566 0.52965 0.53245 0.53393 0.53445 0.53438 0.53422 0.5343 0.53497 0.53626 0.53826 0.54069 0.54338 0.54587 0.54789 0.54925 0.54999 0.5501 0.54991 0.5495 0.54898 0.54837 0.54767 0.5469 0.54599 0.54502 0.54409 0.54327 0.54256 0.54212 0.54179 0.5415 0.541 0.54024 0.53907 0.53752 0.53584 0.53421 0.53289 0.53194 0.53143 0.53115 0.53109 0.53107 0.53105 0.53103 0.53094 0.5308 0.53056 0.53024 0.52993 0.52973 0.52965 0.52977 0.53006 0.53062 0.53144 0.53265 0.53421 0.53605 0.53828 0.54089 0.54383 0.54694 0.55024 0.55366 0.55722 0.56076 0.56435 0.568 0.57163 0.57521 0.57884 0.58245 0.58618 0.58993 0.59384 0.59787 0.60205 0.60631 0.61062 0.61486 0.61917 0.6234 0.62744 0.63142 0.63536 0.63908 0.64274 0.64629 0.64985 0.6533 0.65657 0.6598 0.66295 0.6659 0.66864 0.67128 0.67358 0.67558 0.67735 0.67892 0.68011 0.6811 0.68177 0.68206 0.68213 0.68189 0.68143 0.68075
-0.03096 -0.03104 -0.031086 -0.031093 -0.031068 -0.031014 -0.030871 -0.030687 -0.030389 -0.030013 -0.02947 -0.028793 -0.027897 -0.026802 -0.025451 -0.023831 -0.021969 -0.01984 -0.01741 -0.014807 -0.011991 -0.0089814 -0.0058261 -0.0025339 0.0007968 0.004148 0.0075603 0.010887 0.014144 0.017362 0.020428 0.023366 0.026181 0.028831 0.031403 0.033824 0.036184 0.03851 0.040789 0.043055 0.045296 0.047508 0.049694 0.051726 0.05365 0.055414 0.056973 0.058285 0.059369 0.060191 0.060791 0.061092 0.061161 0.060941 0.06048 0.059726 0.058737 0.057498 0.056038 0.054436 0.052726 0.050908 0.049101 0.047311 0.045574 0.043926 0.042342 0.040898 0.039573 0.038358 0.037275 0.036311 0.035444 0.034705 0.034044 0.03348 0.032991 0.032546 0.032159 0.031829 0.031507 0.031211 0.030936 0.030662 0.030386 0.030086 0.029777 0.029429 0.029062 0.028666 0.028243 0.027804 0.02737 0.026934 0.026524 0.026157 0.025818 0.025547 0.025336 0.025209 0.025153 0.025195 0.025314 0.025547 0.025884 0.026344 0.026936 0.027646 0.028483 0.029489 0.030632 0.031932 0.033396 0.034999 0.036817 0.03875 0.040859 0.043115 0.045497 0.048033 0.050654 0.053356 0.056187 0.059028 0.061931 0.064842 0.067727 0.070665 0.073473 0.076216 0.078899 0.081437 0.083895 0.086236 0.088475 0.090714 0.092873 0.095031 0.097246 0.099559 0.10208 0.10482 0.10784 0.11131 0.11509 0.11933 0.12397 0.12903 0.13468 0.14063 0.14715 0.15421 0.16169 0.1697 0.17794 0.18643 0.19528 0.20408 0.21296 0.22171 0.23021 0.23861 0.24652 0.254 0.26107 0.26747 0.27346 0.27866 0.2833 0.28738 0.29087 0.29386 0.29638 0.29851 0.30034 0.30184 0.30309 0.30416 0.30502 0.30575 0.30632 0.30674 0.30703 0.30717 0.30716 0.307 0.30669 0.30622 0.30566 0.30497 0.30421 0.30339 0.30249 0.30152 0.30052 0.29947 0.29836 0.29719 0.29598 0.29473 0.29346 0.29219 0.29083 0.28946 0.28809 0.28669 0.28534 0.28398 0.28267 0.28139 0.28014 0.27895 0.27785 0.27679 0.27574 0.27481 0.27399 0.27325 0.27255 0.27193 0.27137 0.27085 0.27038 0.26993 0.26952 0.26912 0.26877 0.26842 0.26809 0.26777 0.26745 0.26711 0.26676 0.26636 0.26593 0.26542 0.26484 0.26419 0.26343 0.2626 0.26165 0.26059 0.25946 0.25817 0.2568 0.2553 0.2537 0.25201 0.25018 0.24832 0.24637 0.24437 0.24235 0.24027 0.2382 0.23612 0.23406 0.23201 0.22995 0.22794 0.22595 0.224 0.22209 0.22019 0.21834 0.21652 0.21474 0.21302 0.21132 0.20969 0.2081 0.20658 0.20513 0.20372 0.20242 0.20122 0.20011 0.19913 0.19826 0.19752 0.19692 0.19644 0.19608 0.19585 0.19578 0.19593 0.19633 0.19702 0.19806 0.19942 0.20118 0.2033 0.20575 0.20858 0.21157 0.2147 0.21777 0.22072 0.22347 0.22589 0.22801 0.22968 0.23102 0.23204 0.23276 0.23331 0.23374 0.23414 0.23452 0.23492 0.23533 0.23574 0.2361 0.23642 0.23668 0.23686 0.23698 0.23712 0.23735 0.2377 0.23821 0.23883 0.23958 0.24035 0.24111 0.2418 0.24239 0.2429 0.24329 0.24361 0.24388 0.24405 0.24418 0.24428 0.24434 0.24437 0.24438 0.24431 0.2441 0.24374 0.24319 0.24245 0.24153 0.24045 0.23921 0.23787 0.23644 0.23495 0.23342 0.23187 0.23036 0.22887 0.22746 0.22612 0.22485 0.2237 0.2226 0.22158 0.2206 0.21962 0.21862 0.21756 0.21644 0.21527 0.21403 0.21275 0.21141 0.2101 0.20867 0.20723 0.2058 0.20443 0.20317 0.20205 0.20111 0.20041 0.2 0.19984 0.19996 0.2004 0.20113 0.20216 0.20359 0.2054 0.20761 0.21039 0.21363 0.21743 0.22181 0.2269 0.23277 0.23944 0.24728 0.25604 0.26592 0.27684 0.28872 0.30154 0.31499 0.3292 0.34358 0.35815 0.37241 0.38615 0.39943 0.41171 0.42334 0.43397 0.4437 0.45249 0.46028 0.4672 0.47294 0.47769 0.4813 0.48377 0.48507 0.48526 0.48447 0.48269 0.48015 0.47704 0.47341 0.46947 0.46534 0.46101 0.45669 0.45229 0.44796 0.4436 0.43935 0.43516 0.431 0.42696 0.42289 0.41889 0.41492 0.41099 0.40708 0.40317 0.39934 0.39551 0.39178 0.38811 0.3846 0.38123 0.37803 0.37508 0.37229 0.36989 0.36772 0.36591 0.36445 0.36338 0.36269 0.36236 0.36243 0.36292 0.36378 0.36505 0.3667 0.36879 0.37125 0.37403 0.37717 0.38053 0.38422 0.38802 0.39205 0.39615 0.40038 0.40466 0.40893 0.41325 0.41745 0.42162 0.42565 0.42956 0.43325 0.43676 0.44008 0.44323 0.44623 0.44903 0.45172 0.45423 0.45666 0.45894 0.46109 0.46311 0.46497 0.46672 0.46836 0.46985 0.47118 0.47242 0.47356 0.47455 0.4754 0.47609 0.47666 0.47708 0.47733 0.4774 0.47735 0.47713 0.47677 0.47624 0.47559 0.47475 0.47375 0.47257 0.47122 0.46969 0.46803 0.4662 0.46436 0.46244 0.4605 0.45859 0.45666 0.45471 0.45269 0.45064 0.4485 0.4463 0.44402 0.44175 0.43942 0.43716 0.43487 0.43261 0.43035 0.42806 0.42577 0.42342 0.42111 0.41869 0.41629 0.41386 0.41146 0.40908 0.40673 0.40439 0.40213 0.3999 0.39772 0.39558 0.39347 0.39146 0.38942 0.38743 0.38543 0.38357 0.38171 0.37993 0.37823 0.37661 0.37513 0.37381 0.37267 0.37177 0.37111 0.37078 0.37079 0.3712 0.37204 0.37335 0.37514 0.37745 0.38026 0.38365 0.38751 0.39194 0.39681 0.40215 0.40775 0.41373 0.41986 0.42605 0.43224 0.43841 0.44447 0.45053 0.45655 0.46262 0.46883 0.47501 0.48109 0.48672 0.49169 0.49554 0.49815 0.49949 0.49981 0.49959 0.49921 0.49907 0.49947 0.50047 0.50216 0.50433 0.50674 0.5091 0.51116 0.51265 0.51356 0.51399 0.51407 0.5139 0.51353 0.51306 0.51243 0.51168 0.51082 0.50985 0.50885 0.50793 0.50716 0.50653 0.50601 0.5055 0.50486 0.50401 0.50287 0.50146 0.49993 0.49854 0.49739 0.49659 0.49611 0.49586 0.49581 0.49582 0.49578 0.49574 0.49568 0.49555 0.49525 0.49496 0.49467 0.49446 0.49438 0.49449 0.49479 0.49538 0.49626 0.49749 0.49907 0.50096 0.5032 0.50582 0.5087 0.51188 0.51519 0.5186 0.52221 0.52579 0.52937 0.53299 0.53665 0.54025 0.54393 0.54755 0.55122 0.555 0.55897 0.56299 0.56723 0.5715 0.57591 0.58028 0.58458 0.5888 0.59291 0.59688 0.60072 0.60449 0.60817 0.61175 0.61522 0.61866 0.62202 0.62522 0.6283 0.63129 0.63399 0.63657 0.63884 0.64094 0.64271 0.64425 0.64551 0.6465 0.64717 0.64754 0.64765 0.64744 0.6471 0.64646
-0.02662 -0.026728 -0.026813 -0.026857 -0.02686 -0.026829 -0.026712 -0.026549 -0.026254 -0.025878 -0.025318 -0.024633 -0.023728 -0.022596 -0.02119 -0.019518 -0.017572 -0.015349 -0.012809 -0.010078 -0.007125 -0.0039666 -0.0006502 0.0028095 0.0063205 0.0098473 0.013456 0.016979 0.020435 0.023852 0.027139 0.030303 0.033354 0.036249 0.039072 0.041746 0.044375 0.046962 0.049478 0.05197 0.054432 0.05683 0.059201 0.061394 0.063463 0.065351 0.067014 0.068397 0.069537 0.070388 0.070978 0.071249 0.071263 0.070966 0.070416 0.069557 0.06846 0.067114 0.065552 0.063857 0.062059 0.060164 0.058282 0.056414 0.054603 0.052876 0.051217 0.049706 0.048303 0.047023 0.045877 0.044859 0.043945 0.043165 0.042471 0.041883 0.041366 0.040904 0.040509 0.040159 0.039824 0.039516 0.039223 0.038929 0.03863 0.038302 0.037972 0.037593 0.037186 0.036748 0.036285 0.0358 0.035326 0.034838 0.034382 0.033968 0.033587 0.033277 0.033034 0.032879 0.032805 0.032836 0.032952 0.033191 0.03355 0.034043 0.034671 0.03543 0.036336 0.03742 0.038655 0.040065 0.041652 0.04339 0.045372 0.047476 0.049778 0.052245 0.054858 0.057641 0.060511 0.063465 0.066567 0.069682 0.072865 0.076057 0.079215 0.082418 0.085478 0.088479 0.091403 0.09417 0.096844 0.099382 0.10181 0.10422 0.10652 0.10883 0.11119 0.11364 0.11631 0.11919 0.12238 0.12605 0.13006 0.13458 0.13953 0.1449 0.15097 0.15743 0.16446 0.17205 0.18009 0.18869 0.19754 0.20665 0.21618 0.22564 0.2352 0.24461 0.25377 0.26281 0.27131 0.27935 0.28693 0.29379 0.30019 0.30577 0.31075 0.31516 0.31895 0.32222 0.32499 0.32736 0.32938 0.33107 0.33246 0.33366 0.33464 0.33548 0.33613 0.33663 0.33699 0.33719 0.33723 0.33709 0.33681 0.33637 0.33581 0.33515 0.3344 0.33357 0.33267 0.33172 0.33071 0.32965 0.32853 0.32736 0.32613 0.32483 0.32348 0.32219 0.3208 0.3194 0.318 0.31657 0.31517 0.31379 0.31243 0.31112 0.30983 0.30861 0.3075 0.30644 0.30538 0.30445 0.30362 0.30286 0.30218 0.30156 0.301 0.3005 0.30006 0.29964 0.29926 0.29889 0.29855 0.29823 0.29793 0.29764 0.29734 0.29703 0.2967 0.29633 0.29592 0.29543 0.29486 0.29422 0.29346 0.2926 0.29163 0.29055 0.28936 0.28803 0.2866 0.28502 0.28333 0.28154 0.27961 0.27763 0.27555 0.27343 0.27127 0.26906 0.26685 0.26463 0.2624 0.26021 0.25801 0.25584 0.25371 0.25161 0.24956 0.2475 0.24551 0.24357 0.24167 0.23982 0.23799 0.23625 0.23454 0.2329 0.23133 0.22982 0.2284 0.22709 0.22588 0.2248 0.22385 0.22303 0.22235 0.22179 0.22137 0.22111 0.22102 0.22117 0.22159 0.2223 0.22339 0.22482 0.22667 0.22891 0.23149 0.23447 0.23761 0.24089 0.24409 0.24712 0.24991 0.25229 0.25433 0.25588 0.25706 0.25792 0.25848 0.25889 0.2592 0.25953 0.25985 0.26024 0.26065 0.2611 0.26155 0.26198 0.26238 0.26279 0.26316 0.26358 0.26409 0.26469 0.26542 0.26624 0.26712 0.26799 0.2688 0.26949 0.27006 0.27051 0.27087 0.27114 0.27139 0.2716 0.27178 0.27197 0.27215 0.27232 0.27246 0.2725 0.2724 0.27212 0.27161 0.2709 0.26996 0.26886 0.26756 0.26614 0.26464 0.26305 0.26143 0.25981 0.25821 0.25664 0.25517 0.25376 0.25243 0.25122 0.25008 0.24902 0.24801 0.24701 0.24599 0.2449 0.24376 0.24254 0.24124 0.23989 0.23848 0.2371 0.23558 0.23406 0.23255 0.23108 0.22975 0.22855 0.22757 0.22682 0.22637 0.2262 0.22633 0.22677 0.22754 0.22863 0.23012 0.23202 0.23434 0.23724 0.24063 0.2446 0.24916 0.25444 0.26052 0.26744 0.27553 0.28456 0.29482 0.30614 0.31842 0.3317 0.3456 0.3603 0.37516 0.39017 0.40492 0.41912 0.4328 0.44547 0.45744 0.46839 0.47841 0.48746 0.49546 0.50258 0.5085 0.51338 0.51712 0.51968 0.52102 0.52125 0.52047 0.51867 0.51609 0.51291 0.50922 0.50521 0.50102 0.49662 0.49223 0.48774 0.48332 0.4789 0.47457 0.4703 0.46605 0.46192 0.45776 0.4537 0.44962 0.44558 0.44161 0.43761 0.4337 0.42977 0.42595 0.4222 0.41861 0.41517 0.41192 0.40891 0.40609 0.40364 0.40145 0.39965 0.39819 0.39714 0.39649 0.39624 0.39641 0.39702 0.39804 0.39949 0.40133 0.40364 0.40633 0.40935 0.41275 0.41638 0.42034 0.42443 0.42875 0.43312 0.43761 0.44215 0.44668 0.45126 0.45572 0.46015 0.46441 0.46858 0.47252 0.47625 0.47981 0.48314 0.48639 0.48935 0.49223 0.49491 0.49751 0.49994 0.50223 0.50439 0.50642 0.50835 0.51011 0.51176 0.51326 0.51463 0.51587 0.517 0.51792 0.51875 0.51941 0.51988 0.52025 0.52039 0.52044 0.52029 0.51995 0.51949 0.51882 0.51799 0.51701 0.51584 0.51448 0.51292 0.51118 0.50931 0.50739 0.50538 0.50335 0.50135 0.49934 0.49729 0.49517 0.49301 0.49078 0.48848 0.4861 0.48376 0.48133 0.47894 0.47651 0.47412 0.47169 0.46924 0.4668 0.4643 0.4618 0.45924 0.45671 0.45414 0.45162 0.44911 0.44668 0.44427 0.44189 0.4396 0.43736 0.43514 0.43299 0.43087 0.42875 0.42669 0.42463 0.42267 0.42072 0.41886 0.41704 0.41536 0.4138 0.41239 0.41114 0.41014 0.40941 0.40901 0.40894 0.40929 0.4101 0.41137 0.41316 0.41548 0.41832 0.42178 0.42572 0.43026 0.4352 0.44069 0.44649 0.45266 0.45895 0.46538 0.47178 0.47813 0.48438 0.49057 0.49677 0.50303 0.50945 0.51582 0.52217 0.52809 0.53329 0.53728 0.53994 0.54121 0.54142 0.54091 0.54022 0.53976 0.5398 0.54049 0.54186 0.54375 0.54602 0.54827 0.55038 0.55204 0.55329 0.55407 0.55448 0.55461 0.55444 0.55408 0.55351 0.55281 0.5519 0.55077 0.54967 0.54856 0.54753 0.54662 0.54575 0.54495 0.54404 0.54296 0.54171 0.54036 0.53896 0.53772 0.53672 0.53608 0.53572 0.53549 0.53541 0.5354 0.53537 0.53532 0.5352 0.53503 0.53471 0.53438 0.53404 0.53377 0.53365 0.53371 0.53404 0.53463 0.53551 0.53674 0.53836 0.5403 0.5427 0.54544 0.54846 0.55173 0.5552 0.55879 0.5625 0.56621 0.56998 0.57367 0.57745 0.58118 0.58492 0.58868 0.59255 0.5964 0.60052 0.6047 0.60909 0.61343 0.61794 0.62246 0.62697 0.63135 0.6356 0.63972 0.64367 0.64743 0.65119 0.65487 0.6584 0.66187 0.66529 0.66863 0.6718 0.67488 0.67757 0.68021 0.68253 0.6847 0.68652 0.68813 0.6895 0.69054 0.69119 0.69162 0.69173 0.69154 0.69119 0.69055
-0.025491 -0.025598 -0.025675 -0.02571 -0.025729 -0.025677 -0.025575 -0.025404 -0.025121 -0.024741 -0.024204 -0.023527 -0.022635 -0.02153 -0.02016 -0.018531 -0.016627 -0.014467 -0.012006 -0.0093683 -0.0065169 -0.003456 -0.0002487 0.0030915 0.0064829 0.0099081 0.013413 0.01685 0.020215 0.023559 0.026759 0.029845 0.032808 0.035599 0.038311 0.040876 0.043378 0.045849 0.048259 0.050648 0.053019 0.055341 0.057628 0.059752 0.061751 0.063576 0.065181 0.066518 0.06763 0.068456 0.069052 0.069335 0.069379 0.06912 0.068611 0.067803 0.066746 0.065428 0.063882 0.062192 0.060396 0.058486 0.05659 0.054712 0.052888 0.051155 0.049494 0.047977 0.046574 0.045292 0.044142 0.043118 0.042195 0.041396 0.040685 0.040079 0.039546 0.039069 0.038657 0.038298 0.037952 0.037642 0.037345 0.037058 0.036763 0.036445 0.03612 0.035753 0.035355 0.034924 0.034467 0.033992 0.033519 0.033039 0.032586 0.032171 0.031796 0.031483 0.031237 0.031077 0.030998 0.031016 0.031118 0.031342 0.031673 0.032131 0.032721 0.033437 0.034294 0.035318 0.036485 0.037824 0.039334 0.040997 0.042887 0.044895 0.047102 0.049467 0.051972 0.05465 0.057416 0.060267 0.06327 0.066293 0.069375 0.072476 0.075552 0.078671 0.081658 0.084578 0.087429 0.090132 0.092738 0.095214 0.097576 0.099927 0.10218 0.10441 0.1067 0.10907 0.11165 0.11444 0.11752 0.12106 0.12492 0.12924 0.13397 0.1391 0.14485 0.15096 0.15763 0.16484 0.1725 0.1807 0.18915 0.19784 0.20692 0.21594 0.22504 0.23399 0.24271 0.25131 0.25939 0.26703 0.27423 0.28073 0.28683 0.29212 0.29686 0.30106 0.30466 0.30779 0.31044 0.31268 0.31463 0.31625 0.31759 0.31874 0.31969 0.32048 0.3211 0.32159 0.32192 0.32211 0.32214 0.322 0.32173 0.3213 0.32077 0.32011 0.31939 0.31858 0.31771 0.3168 0.31583 0.31482 0.31375 0.31264 0.31148 0.31027 0.30902 0.3078 0.30647 0.30514 0.30381 0.30246 0.30112 0.29979 0.2985 0.29725 0.29602 0.29485 0.29375 0.29271 0.29168 0.29079 0.28999 0.28925 0.28858 0.28799 0.28743 0.28693 0.28649 0.28606 0.28568 0.2853 0.28496 0.28464 0.28434 0.28404 0.28375 0.28344 0.28311 0.28276 0.28236 0.28189 0.28135 0.28074 0.28001 0.2792 0.27827 0.27724 0.27612 0.27486 0.2735 0.27201 0.27042 0.26875 0.26693 0.26508 0.26312 0.26111 0.25909 0.25701 0.25494 0.25287 0.25079 0.24875 0.24668 0.24467 0.24268 0.24071 0.2388 0.2369 0.23506 0.23326 0.23149 0.2298 0.22811 0.2265 0.22494 0.22344 0.22202 0.22066 0.21939 0.21824 0.21719 0.21628 0.21549 0.21485 0.21435 0.21397 0.21371 0.21359 0.21363 0.21389 0.2144 0.21518 0.21632 0.21778 0.21962 0.22182 0.22433 0.22722 0.23026 0.23343 0.23652 0.23948 0.24221 0.24461 0.24669 0.24833 0.24963 0.25062 0.25132 0.25188 0.25234 0.25277 0.2532 0.25365 0.25411 0.25457 0.25498 0.25533 0.2556 0.25582 0.25599 0.25618 0.25644 0.2568 0.25731 0.25793 0.25865 0.25937 0.26008 0.26071 0.26124 0.26167 0.262 0.26227 0.26247 0.26262 0.26273 0.26281 0.26286 0.26289 0.26289 0.26282 0.26263 0.26228 0.26175 0.26104 0.26016 0.25912 0.25792 0.25662 0.25522 0.25376 0.25229 0.25077 0.2493 0.24785 0.24647 0.24517 0.24394 0.2428 0.24173 0.24073 0.23977 0.23882 0.23785 0.23682 0.23574 0.23459 0.23336 0.23211 0.23079 0.22951 0.22809 0.22668 0.22525 0.22389 0.22264 0.22152 0.22059 0.2199 0.21947 0.21931 0.21942 0.21983 0.22053 0.22155 0.22292 0.22468 0.22681 0.22948 0.23262 0.2363 0.24057 0.24549 0.2512 0.25767 0.26529 0.27378 0.2834 0.29408 0.30569 0.31824 0.33142 0.34537 0.35948 0.37382 0.38786 0.40141 0.41448 0.4266 0.43805 0.44851 0.4581 0.46673 0.47436 0.48114 0.48675 0.49142 0.49492 0.49734 0.49858 0.49878 0.49799 0.49626 0.49378 0.49075 0.48721 0.48336 0.47932 0.47511 0.47088 0.46661 0.46237 0.45816 0.45403 0.44997 0.44594 0.44201 0.43806 0.43419 0.43034 0.42652 0.42275 0.41897 0.41528 0.41154 0.40796 0.40442 0.40103 0.39781 0.39474 0.39189 0.38925 0.38694 0.38491 0.3832 0.38182 0.38086 0.38026 0.38003 0.38021 0.38081 0.3818 0.38322 0.38501 0.38721 0.3898 0.39271 0.39599 0.39947 0.40327 0.40721 0.41136 0.41558 0.41986 0.42423 0.42857 0.43299 0.43725 0.44152 0.4456 0.44957 0.45332 0.45687 0.46024 0.4634 0.46642 0.46922 0.47196 0.47447 0.47689 0.47915 0.48132 0.48334 0.48524 0.48703 0.48867 0.4902 0.4916 0.49289 0.49404 0.49508 0.49596 0.49673 0.49738 0.49787 0.4982 0.49833 0.49835 0.4982 0.49793 0.49748 0.49687 0.4961 0.49517 0.49408 0.49283 0.49135 0.48972 0.48794 0.48617 0.48429 0.48242 0.48055 0.47867 0.47677 0.4748 0.47279 0.47068 0.46853 0.46634 0.46412 0.46186 0.45961 0.45736 0.45511 0.45285 0.45061 0.44835 0.44604 0.44373 0.44135 0.43897 0.43658 0.43423 0.43185 0.42956 0.42729 0.42506 0.42289 0.4208 0.41872 0.41668 0.41471 0.41274 0.41083 0.40891 0.40708 0.4053 0.40359 0.40193 0.40041 0.399 0.3977 0.39662 0.39579 0.39519 0.39492 0.39499 0.39545 0.39635 0.39773 0.3996 0.402 0.40487 0.40829 0.41216 0.41658 0.4214 0.42666 0.43219 0.43805 0.44403 0.4501 0.45612 0.46208 0.46802 0.47389 0.47975 0.4856 0.49158 0.49757 0.5035 0.50903 0.51385 0.51757 0.5201 0.52134 0.52162 0.52129 0.52084 0.52057 0.52081 0.52164 0.5231 0.52501 0.52724 0.52946 0.53141 0.53294 0.53401 0.5346 0.53488 0.53488 0.53471 0.53434 0.53386 0.53319 0.53239 0.53147 0.53048 0.52951 0.52866 0.52792 0.52726 0.5266 0.52584 0.52492 0.52375 0.52243 0.52108 0.51984 0.51881 0.5181 0.51766 0.51741 0.51733 0.51728 0.51719 0.5171 0.51697 0.51685 0.51653 0.51619 0.51585 0.51559 0.5155 0.51555 0.51582 0.51637 0.51715 0.51825 0.51972 0.52149 0.52368 0.52619 0.529 0.53203 0.53522 0.53855 0.542 0.54545 0.54899 0.55252 0.5561 0.55965 0.56322 0.56681 0.57049 0.57429 0.57819 0.58226 0.5865 0.59076 0.59517 0.5995 0.60389 0.6081 0.61222 0.61625 0.62019 0.62388 0.62762 0.63124 0.63477 0.63818 0.64151 0.64479 0.64793 0.65092 0.65363 0.6563 0.65862 0.66076 0.66258 0.6642 0.66554 0.66654 0.6673 0.66768 0.66785 0.6677 0.66731 0.66669
-0.025574 -0.025672 -0.025746 -0.025775 -0.025771 -0.025724 -0.025593 -0.025424 -0.02512 -0.02474 -0.024184 -0.023493 -0.022582 -0.021451 -0.020051 -0.018379 -0.016423 -0.014194 -0.011636 -0.0088695 -0.0058677 -0.0026447 0.0007479 0.0043048 0.0079167 0.01156 0.015277 0.018903 0.022441 0.025927 0.029261 0.032448 0.035494 0.038359 0.041143 0.043767 0.04633 0.048863 0.051337 0.053803 0.056252 0.058668 0.061059 0.063291 0.065428 0.06739 0.069148 0.070632 0.071884 0.072845 0.07356 0.073942 0.074067 0.073877 0.073416 0.07263 0.071584 0.070255 0.068692 0.066964 0.065122 0.063158 0.0612 0.059258 0.057365 0.055569 0.053845 0.05227 0.050818 0.049494 0.048313 0.047264 0.046327 0.045522 0.044805 0.044197 0.04366 0.043177 0.042758 0.042389 0.042024 0.041691 0.041365 0.041041 0.040709 0.040349 0.039984 0.039583 0.039154 0.038699 0.038221 0.037732 0.037248 0.036768 0.036322 0.035911 0.035542 0.035244 0.035009 0.034868 0.034802 0.034848 0.034972 0.035231 0.035601 0.0361 0.036742 0.037518 0.038444 0.039544 0.040798 0.042231 0.043844 0.045611 0.047611 0.04974 0.052061 0.054546 0.057161 0.059948 0.062819 0.065768 0.068855 0.071954 0.07511 0.078274 0.081405 0.084582 0.087624 0.090589 0.093492 0.096238 0.098885 0.10141 0.10382 0.10624 0.10856 0.11089 0.11327 0.11577 0.11848 0.12144 0.1247 0.12845 0.13255 0.13714 0.14215 0.14763 0.15374 0.16026 0.16737 0.17502 0.18313 0.1918 0.20072 0.2099 0.21948 0.22898 0.23857 0.24802 0.25719 0.26623 0.27474 0.28277 0.29034 0.29719 0.30359 0.30912 0.31408 0.31844 0.32219 0.32541 0.32812 0.33042 0.33238 0.334 0.33532 0.33644 0.33735 0.3381 0.33868 0.33912 0.33939 0.33951 0.33947 0.33924 0.33887 0.33831 0.33765 0.33687 0.336 0.33506 0.33404 0.33297 0.33183 0.33065 0.32943 0.32814 0.32679 0.32541 0.32399 0.32258 0.32108 0.31959 0.3181 0.31657 0.31509 0.31361 0.31218 0.31081 0.30948 0.3082 0.30703 0.30592 0.30485 0.30391 0.30304 0.30228 0.30158 0.30097 0.30041 0.29991 0.29946 0.29904 0.29867 0.29829 0.29796 0.29765 0.29732 0.29701 0.29671 0.29637 0.29602 0.29561 0.29515 0.29463 0.29403 0.29337 0.29257 0.2917 0.29071 0.28961 0.28842 0.28708 0.28564 0.28407 0.2824 0.28063 0.27871 0.27675 0.27469 0.27259 0.27046 0.26826 0.26608 0.26388 0.26168 0.25951 0.25731 0.25517 0.25304 0.25096 0.24892 0.24687 0.2449 0.24296 0.24106 0.23921 0.23739 0.23563 0.23393 0.23229 0.23073 0.22921 0.2278 0.22649 0.22529 0.22421 0.22324 0.2224 0.2217 0.22112 0.22064 0.22031 0.22014 0.22019 0.22051 0.22111 0.22209 0.22342 0.22517 0.2273 0.22978 0.23269 0.2358 0.23907 0.24232 0.24543 0.24837 0.25097 0.25326 0.25508 0.25654 0.25765 0.25844 0.25902 0.25949 0.25991 0.26031 0.2607 0.2611 0.2615 0.26187 0.26219 0.26243 0.26262 0.26276 0.26292 0.26318 0.26358 0.26417 0.2649 0.26577 0.26669 0.26759 0.26843 0.26916 0.2698 0.27031 0.27074 0.27112 0.2714 0.27162 0.27181 0.27195 0.27207 0.27215 0.27213 0.27198 0.27164 0.27111 0.27036 0.26942 0.26829 0.26699 0.26558 0.26406 0.26247 0.26086 0.25921 0.25759 0.256 0.25448 0.25304 0.25168 0.25042 0.24923 0.24814 0.24708 0.24603 0.24496 0.24383 0.24264 0.24138 0.24005 0.23866 0.23722 0.23582 0.23428 0.23274 0.23121 0.22974 0.2284 0.22719 0.22619 0.22545 0.22499 0.22482 0.22496 0.22541 0.22619 0.2273 0.2288 0.23072 0.23306 0.23599 0.23944 0.24347 0.24812 0.2535 0.25968 0.2667 0.27495 0.28414 0.29457 0.30606 0.31858 0.33206 0.34619 0.36115 0.37626 0.39157 0.40657 0.42102 0.43494 0.44782 0.46002 0.47113 0.48133 0.49052 0.49867 0.50591 0.51191 0.51684 0.52061 0.52319 0.52453 0.52473 0.5239 0.52206 0.5194 0.51614 0.51231 0.50817 0.50381 0.49923 0.49464 0.48997 0.48536 0.48072 0.47617 0.47168 0.4672 0.46282 0.45843 0.45411 0.44981 0.44557 0.44137 0.43718 0.4331 0.42901 0.42507 0.42118 0.41748 0.41396 0.4106 0.4075 0.40462 0.4021 0.39986 0.39796 0.39644 0.39533 0.39461 0.3943 0.39441 0.39494 0.39587 0.39727 0.39906 0.40129 0.4039 0.40686 0.41015 0.41367 0.41752 0.42152 0.42571 0.42999 0.43433 0.43875 0.44317 0.44764 0.45201 0.45636 0.46055 0.46467 0.4686 0.47233 0.47595 0.47935 0.48266 0.48576 0.48872 0.49152 0.4942 0.49669 0.49907 0.50132 0.50339 0.50536 0.50715 0.50881 0.51032 0.51168 0.51291 0.51395 0.51489 0.51563 0.51626 0.5167 0.51697 0.51706 0.51697 0.51673 0.51632 0.51575 0.51499 0.51403 0.51289 0.51156 0.51009 0.50835 0.50648 0.50444 0.50235 0.5002 0.49803 0.49583 0.49364 0.49143 0.48916 0.48682 0.48439 0.48191 0.4793 0.47671 0.47409 0.4715 0.46892 0.46635 0.46379 0.46122 0.45868 0.45612 0.45353 0.45089 0.4483 0.44568 0.4431 0.44055 0.43806 0.43555 0.43315 0.43082 0.42854 0.42632 0.42411 0.42198 0.41988 0.4178 0.41577 0.4138 0.41189 0.41005 0.40829 0.40668 0.40516 0.40383 0.40266 0.40175 0.40112 0.40082 0.40089 0.40133 0.40224 0.40359 0.40548 0.40788 0.41085 0.41436 0.41837 0.42296 0.42798 0.4335 0.43934 0.44554 0.4519 0.45839 0.46481 0.47123 0.47759 0.4839 0.49023 0.49655 0.50304 0.50946 0.51586 0.52184 0.52716 0.53128 0.53411 0.53557 0.53598 0.53572 0.5353 0.53512 0.53548 0.5365 0.53821 0.54043 0.54298 0.54543 0.54761 0.54923 0.55027 0.55081 0.55099 0.55091 0.55066 0.55023 0.54966 0.54889 0.54797 0.54694 0.54585 0.54487 0.54398 0.54329 0.54265 0.54205 0.54134 0.5404 0.53915 0.53772 0.53617 0.53474 0.53358 0.5328 0.53235 0.53212 0.53209 0.53211 0.53216 0.53214 0.53206 0.53193 0.53168 0.53138 0.53108 0.53083 0.5308 0.53089 0.53126 0.53188 0.53279 0.53407 0.53573 0.53779 0.54024 0.54298 0.54608 0.54942 0.55291 0.55653 0.56029 0.564 0.56787 0.57166 0.57556 0.57935 0.58323 0.58711 0.591 0.595 0.59912 0.60333 0.6077 0.61216 0.61669 0.62115 0.62565 0.63004 0.63431 0.63838 0.64242 0.64624 0.64998 0.65372 0.65737 0.66085 0.66436 0.66768 0.6709 0.67407 0.67696 0.6797 0.68207 0.68434 0.68619 0.68788 0.68922 0.69028 0.69103 0.69142 0.69148 0.69129 0.69075 0.69009
-0.024138 -0.024224 -0.024278 -0.024291 -0.024282 -0.024227 -0.024098 -0.023912 -0.023609 -0.023249 -0.022701 -0.022021 -0.021136 -0.020035 -0.018686 -0.017056 -0.015157 -0.012995 -0.010515 -0.0078377 -0.0049344 -0.0018139 0.0014699 0.004903 0.0083971 0.011919 0.015511 0.019024 0.022449 0.025818 0.029031 0.032098 0.035026 0.037776 0.040433 0.042924 0.045365 0.047782 0.050143 0.052487 0.054834 0.057143 0.059441 0.061593 0.063641 0.065528 0.067223 0.068651 0.069859 0.070798 0.07151 0.071901 0.072044 0.071878 0.071454 0.070712 0.069715 0.068437 0.066919 0.065237 0.063439 0.061518 0.059605 0.057699 0.055853 0.054098 0.052418 0.050877 0.049463 0.048175 0.047018 0.045995 0.045073 0.044284 0.043584 0.04298 0.042452 0.041975 0.041553 0.04119 0.040832 0.040503 0.040185 0.039867 0.039545 0.039196 0.03884 0.038453 0.038032 0.037598 0.037134 0.036666 0.036205 0.035743 0.035315 0.03492 0.034567 0.034274 0.034051 0.033917 0.033861 0.0339 0.034027 0.034274 0.034631 0.03511 0.035733 0.036477 0.037363 0.038423 0.039629 0.041007 0.042556 0.044252 0.046172 0.048215 0.050445 0.052829 0.055338 0.058013 0.060772 0.063598 0.066569 0.06955 0.072584 0.075621 0.078639 0.081695 0.084613 0.087471 0.090264 0.092909 0.095459 0.097886 0.10021 0.10252 0.10474 0.10698 0.10926 0.11166 0.11426 0.1171 0.12022 0.12381 0.12773 0.13212 0.13691 0.1421 0.14788 0.15405 0.16079 0.16804 0.17573 0.18394 0.19239 0.20108 0.21014 0.21913 0.22819 0.23711 0.24577 0.25431 0.26235 0.26993 0.27709 0.28358 0.28961 0.29487 0.29956 0.3037 0.30726 0.31033 0.3129 0.31508 0.31695 0.31849 0.31975 0.32082 0.32167 0.32238 0.32294 0.32334 0.32361 0.32372 0.32367 0.32344 0.32308 0.32255 0.32193 0.32117 0.32034 0.31943 0.31846 0.31744 0.31634 0.31522 0.31401 0.31277 0.31147 0.31014 0.30875 0.30737 0.30589 0.30445 0.30301 0.30156 0.30015 0.29874 0.29739 0.29609 0.29485 0.29366 0.29256 0.29148 0.29044 0.28953 0.28872 0.28799 0.28734 0.28676 0.28622 0.28575 0.28533 0.28493 0.28457 0.28422 0.2839 0.28359 0.28329 0.28301 0.28271 0.28239 0.28204 0.28165 0.28123 0.28073 0.28015 0.27951 0.27876 0.27794 0.277 0.27595 0.27483 0.27356 0.2722 0.27072 0.26914 0.26747 0.26566 0.26381 0.26188 0.2599 0.25789 0.25583 0.25377 0.25171 0.24964 0.24759 0.24552 0.24351 0.24151 0.23955 0.23763 0.23572 0.23386 0.23205 0.23027 0.22854 0.22683 0.2252 0.22361 0.22209 0.22063 0.21923 0.21793 0.21672 0.21561 0.21463 0.21376 0.21301 0.21239 0.21189 0.21149 0.21121 0.21108 0.21116 0.21149 0.21208 0.21305 0.21433 0.21602 0.21807 0.22046 0.22323 0.2262 0.22934 0.23244 0.23545 0.2383 0.24083 0.24308 0.24491 0.24639 0.24754 0.24837 0.24902 0.24953 0.24998 0.2504 0.25081 0.25121 0.25159 0.25192 0.25218 0.25234 0.25241 0.25243 0.25246 0.2526 0.25287 0.25333 0.25396 0.25473 0.25558 0.25642 0.25723 0.25793 0.25855 0.25906 0.25948 0.25984 0.26009 0.26026 0.26038 0.26045 0.26049 0.2605 0.26042 0.26023 0.25988 0.25933 0.2586 0.25771 0.25664 0.25542 0.25409 0.25266 0.25116 0.24965 0.2481 0.24657 0.24508 0.24365 0.2423 0.24101 0.23982 0.23871 0.23767 0.23667 0.23567 0.23466 0.23358 0.23245 0.23125 0.23 0.2287 0.22735 0.22604 0.2246 0.22315 0.22171 0.22033 0.21907 0.21793 0.21699 0.21629 0.21587 0.21571 0.21583 0.21626 0.21699 0.21805 0.21947 0.22127 0.22346 0.22623 0.22946 0.23328 0.23766 0.24272 0.24856 0.2552 0.26301 0.27169 0.28152 0.29243 0.30427 0.3171 0.33053 0.34479 0.35919 0.37382 0.38816 0.40201 0.41537 0.42779 0.43953 0.45031 0.46014 0.46901 0.47689 0.48388 0.48972 0.49455 0.49822 0.50071 0.50203 0.50226 0.50146 0.49968 0.49713 0.49398 0.49029 0.48629 0.48207 0.47765 0.4732 0.46869 0.46422 0.45974 0.45536 0.45104 0.44671 0.44249 0.43825 0.43411 0.42996 0.42588 0.42185 0.41783 0.41391 0.40997 0.4062 0.40247 0.39893 0.39555 0.39235 0.3894 0.38664 0.38423 0.38208 0.38029 0.37881 0.37776 0.37708 0.37677 0.37685 0.37737 0.37827 0.37958 0.38128 0.38339 0.38588 0.3887 0.39187 0.39522 0.39891 0.40272 0.40673 0.41082 0.41501 0.41923 0.42346 0.42777 0.43195 0.43616 0.4402 0.44416 0.44791 0.45152 0.45497 0.45824 0.46142 0.46438 0.46727 0.46996 0.47253 0.47492 0.47724 0.47939 0.48138 0.48329 0.48502 0.48661 0.48807 0.48938 0.49054 0.49158 0.49244 0.49317 0.49373 0.49417 0.49443 0.49452 0.49446 0.4942 0.4938 0.49324 0.49249 0.4916 0.49054 0.4893 0.48784 0.48618 0.48439 0.48242 0.48043 0.47835 0.47626 0.47419 0.47209 0.46998 0.46778 0.46555 0.46323 0.46079 0.4583 0.45584 0.45334 0.45083 0.44833 0.44588 0.44346 0.44102 0.4386 0.43616 0.4337 0.4312 0.42873 0.42622 0.42377 0.42133 0.41896 0.41658 0.41427 0.41203 0.40984 0.40772 0.40563 0.40359 0.40157 0.3996 0.39765 0.3958 0.39399 0.39228 0.39062 0.3891 0.38771 0.38647 0.3854 0.38459 0.38405 0.38378 0.38388 0.38438 0.38531 0.38669 0.38854 0.39093 0.3938 0.39722 0.40114 0.40558 0.41042 0.41576 0.4214 0.42741 0.43351 0.43976 0.44596 0.45214 0.45827 0.46437 0.47045 0.47659 0.48282 0.48903 0.49521 0.50096 0.50602 0.50995 0.51272 0.51411 0.51454 0.51438 0.51406 0.51396 0.51443 0.51552 0.51728 0.51952 0.52201 0.52445 0.52653 0.52804 0.52902 0.52941 0.52953 0.52937 0.52909 0.52867 0.52808 0.52737 0.52651 0.52554 0.52455 0.52363 0.52285 0.52222 0.5217 0.52118 0.52055 0.51972 0.51855 0.51708 0.51557 0.51413 0.51295 0.51215 0.51164 0.51141 0.51137 0.51139 0.51141 0.51138 0.51132 0.51119 0.51094 0.51066 0.51038 0.51018 0.51008 0.51022 0.51054 0.51114 0.51205 0.51327 0.51486 0.51684 0.51915 0.52179 0.52475 0.52791 0.53124 0.53472 0.53834 0.54196 0.54563 0.54936 0.55309 0.55675 0.56053 0.5642 0.56808 0.57196 0.57602 0.58012 0.58443 0.58875 0.5932 0.59761 0.60192 0.60615 0.61027 0.61436 0.61828 0.62206 0.62585 0.62953 0.63311 0.63662 0.64001 0.64331 0.64649 0.64955 0.65247 0.6551 0.65758 0.6598 0.66172 0.66335 0.66465 0.66568 0.6664 0.66678 0.66681 0.66659 0.66616 0.6654
[truncated: 56,722 more chars]
