# Supplementary material for: A Comparison of Sparse Partial Least Squares and Elastic Net in Wavelength Selection on NIR Spectroscopy Data
Source: Int J Anal Chem. 2019 Aug 1;2019:7314916. doi: 10.1155/2019/7314916 (PMC6699329; doi:10.1155/2019/7314916)
Supplement: Supplementary Materials — Three real data sets used in Section 4. All the data sets are saved as “.txt” format and can be used freely. [file 7314916.f1.zip › 7314916.f1/propvals.txt]

10.448	3.687	8.746	64.838
10.409	3.72	8.658	64.851
10.313	3.496	9.125	63.567
10.26	3.504	9.389	63.263
10.292	3.661	8.952	64.148
10.253	3.507	8.728	64.287
9.732	3.699	9.41	63.513
9.739	3.716	9.595	63.631
10.335	3.748	9.445	63.021
10.108	3.619	9.334	63.356
9.754	3.556	8.504	66.472
9.407	3.787	8.737	65.386
9.942	3.693	8.268	65.72
9.978	3.677	7.788	65.808
9.911	3.82	8.918	64.544
9.673	3.832	9.018	64.62
10.221	3.524	9.092	63.823
9.857	3.3	9.452	63.913
10.302	3.46	9.333	62.826
9.818	3.446	9.073	64.292
10.169	3.541	9.711	63.099
10.034	3.417	9.694	63.246
9.691	3.645	8.685	65.474
9.78	3.71	8.729	65.427
10.143	3.67	8.842	64.582
10.346	3.479	9.436	63.466
9.748	3.766	9.179	65.107
9.641	3.822	8.823	65.601
10.069	3.449	9.592	63.416
10.723	3.212	8.23	64.261
10.747	3.212	8.412	64.42
10.826	3.519	8.412	64.613
10.626	3.464	8.282	65.104
10.323	3.59	8.716	64.923
10.371	3.569	8.435	65.637
10.817	3.404	8.147	65.022
10.936	3.415	8.375	64.546
10.336	3.583	8.506	64.787
10.451	3.457	8.499	64.656
10.525	3.226	8.271	64.895
10.535	3.264	8.266	65.193
10.882	3.316	8.112	65.217
10.592	3.201	8.112	65.115
10.296	3.28	8.277	65.441
10.311	3.424	8.496	64.67
10.13	3.435	8.445	65.519
9.817	3.363	8.285	65.795
10.273	3.556	8.994	64.253
10.08	3.494	9.286	64.266
10.315	3.584	8.552	64.632
10.126	3.407	8.423	64.915
10.025	3.437	8.467	64.882
9.973	3.451	8.479	64.933
10.146	3.539	8.432	64.806
10.146	3.59	8.54	64.757
10.301	3.306	7.759	65.524
9.776	3.494	8.286	65.646
10.143	3.641	8.381	65.841
9.95	3.505	8.225	65.374
9.95	3.491	8.361	65.294
10.303	3.751	8.986	64.539
10.597	3.595	9.313	64.367
10.413	3.449	8.905	64.574
10.32	3.676	8.338	65.547
10.55	3.652	8.571	65.205
10.993	3.557	9.354	63.247
9.958	3.088	9.021	63.784
10.398	3.163	9.382	62.884
10.509	3.38	7.654	65.903
10.831	3.686	7.908	65.437
9.377	3.497	8.613	64.506
9.43	3.446	8.838	64.131
10.568	3.306	7.873	65.337
10.855	3.55	8.288	64.464
9.872	3.105	8.649	65.371
10.785	3.251	7.876	65.233
10.097	3.49	8.586	65.679
10.442	3.345	8.03	65.144
10.587	3.176	8.132	65.209
10.977	3.328	8.428	64.853
