# Supplementary material for: A Comparison of Sparse Partial Least Squares and Elastic Net in Wavelength Selection on NIR Spectroscopy Data
Source: Int J Anal Chem. 2019 Aug 1;2019:7314916. doi: 10.1155/2019/7314916 (PMC6699329; doi:10.1155/2019/7314916)
Supplement: Supplementary Materials — Three real data sets used in Section 4. All the data sets are saved as “.txt” format and can be used freely. [file 7314916.f1.zip › 7314916.f1/Readme.txt]

three real data sets used in section 4. All the data sets are save as ".txt" format.
The corn  as well as gasoline data sets are two public spectroscopy data sets.
The buckwheat data set is from our lab and can be used freely.


corn data set:

m5spec:  one of the predictor matrice (NIR spectroscopy data)  of corn data set
mp5spec: one of the predictor matrice (NIR spectroscopy data)  of corn data set
mp6spec: one of the predictor matrice (NIR spectroscopy data)  of corn data set
propvals: the response matrix of corn data set
 

gasoline data set:

gasolineX: the predictor matrix (NIR spectroscopy data)  of gasoline data set
gasoliney: the response of gasoline data set

buckwheat  data set:

bwX: the predictor matrix (NIR spectroscopy data)  of buckwheat data set
bwy: the response of buckwheat data set

 for more details, see section 4.1 , 4.2 and 4.3 of the article.
